# Supplementary material for: Extensive transcriptome sex-reversal later in life, after developmental low-dose bisphenol A exposure
Source: Research Square preprint supplement (doi:10.21203/rs.3.rs-2977026/v1), 2023-07-06
Supplement: Supplementary file 1 [file 61ea8620a1e9468d83bb6f5f.xlsx]

## Sheet: Common up
Probe_ID Female	Rank Female	Female BPA(0.5+50) vs Female Control, FC (fold change)	Gene Symbol	Male BPA(0.5+50) vs Male Control, MC (fold change)	Rank Male	Probe_ID Male
17709291	434	1.10858	Adprhl1	1.19822	134	17709281
17609625	320	1.35178	Ap3d1	1.08459	27	17609795
17603153	17	1.0939	Arfgap2	1.29034	687	17603077
17839737	986	1.09066	Atxn10	1.12451	695	17839737
17760451	1179	1.0711	Brd3	1.09918	404	17760451
17608697	638	1.06024	Ccdc17	1.17665	676	17608695
17636806	734	1.13518	Cdr2	1.13921	1074	17636806
17863710	289	1.16587	Cfc1	1.19908	809	17863710
17604993	1190	1.12935	Chmp5	1.11241	670	17604993
17683592	937	1.07468	Clasp1	1.11149	268	17683592
17605419	1260	1.36841	Cnot7	2.53939	164	17605441
17872257	752	1.06001	Ctps2	1.07886	210	17872257
17608727	387	1.13174	Dbndd2	1.23148	554	17608709
17657284	643	1.10357	Dnah9	1.10725	1042	17657302
17670118	845	1.08444	Eif4a2	1.09194	763	17670118
17607967	325	1.14836	Eif4enif1	1.28793	764	17607965
17818965	1144	1.08152	Eif5	1.15389	174	17818965
17607357	268	1.30469	Elp2	1.12585	179	17607307
17751520	932	1.07575	ENSRNOG00000065234	1.08496	1056	17881599
17674844	1165	1.07763	Ep400	1.14575	492	17674844
17722258	572	1.11585	Epb41l4a	1.23885	304	17722258
17785017	313	1.16054	Exoc6b	1.07717	1154	17792709
17611075	1108	1.24005	Eya4	1.20234	221	17611079
17774100	1213	1.08409	Fads2b	1.18498	33	17774100
17606029	592	1.54515	Fbxw8	1.25449	907	17605933
17874930	985	1.0643	Gabra3	1.08067	520	17874930
17739042	978	1.05455	Gda	1.08247	383	17839395
17601899	281	1.20232	Gnb3	1.78946	679	17601935
17725568	640	1.11366	Hspa9	1.16288	627	17725568
17764480	1050	1.14271	Immp1l	1.1617	507	17764480
17700732	392	1.15954	Ipo5	1.0914	516	17705578
17619502	1011	1.1073	Ipo7	1.24264	67	17619502
17789808	665	1.05462	Iqck	1.08202	272	17789808
17840724	62	1.07011	Kansl2	1.13958	202	17840724
17862492	1129	1.31009	Kcnh8	1.35285	269	17862492
17674327	1300	1.0868	Ksr2	1.13265	1212	17674327
17646715	731	1.04868	Lrrc75a	1.10194	623	17646717
17711284	8	1.91463	Marchf1	1.04574	922	17711277
17608579	105	1.08793	Mettl5	2.07257	1286	17608565
17604911	167	4.9087	Ncstn	1.15327	61	17604913
17859645	1137	1.05436	Nop58	1.07406	246	17859645
17801863	437	1.12835	Pabpc4	1.2012	59	17801861
17817269	152	1.12484	Papln	1.08524	1182	17817269
17624523	976	1.05455	Pde8a	1.08247	380	17624523
17765469	935	1.13974	Pdia3	1.22701	98	17765469
17791155	838	1.08548	Pdia4	1.08971	1036	17791155
17668828	440	1.1741	Phldb2	1.21896	590	17668828
17831177	465	1.10416	Poldip3	1.13496	952	17831177
17842354	758	1.06036	Ppan	1.09727	1211	17842356
17602305	1124	1.2487	Prpf8	1.11227	79	17602231
17602165	1246	1.05675	Puf60	1.17141	365	17602131
17607667	493	1.37467	Rabgap1	1.65543	86	17607699
17873757	442	1.12654	Rbm31y	1.17117	595	17873757
17775148	866	1.02925	Rpl17	1.11559	771	17724289
17675697	1114	1.14397	Rpl21	1.26281	68	17675697
17692574	279	1.10458	Rpl5	1.17554	127	17692576
17624595	88	1.06303	Rps12	1.13507	50	17611073
17614858	869	1.19054	Rps16	1.19979	116	17614865
17848896	1111	1.06813	Rpsa	1.2079	44	17848894
17607075	38	1.17599	Slc4a8	1.13857	215	17607139
17796850	246	1.04299	Snrpg	1.09969	156	17849826
17602781	1105	1.10589	Srp14	1.16167	1189	17602785
17604409	557	1.0798	Srp72	1.21339	628	17604307
17757282	707	1.14358	Srsf3	1.2914	335	17757282
17609597	107	1.07585	Suds3	1.14353	159	17609499
17710187	1174	1.09099	Timm23	1.20944	43	17710187
17600221	1363	1.09968	Ube2d3	1.07038	435	17600237
17836105	699	1.21119	Uqcrb	1.35171	1276	17836105
17601743	126	1.11333	Usp5	1.2183	606	17601789
17605345	168	1.27563	Vps35l	2.80069	72	17605083
17604199	1056	1.45467	Ythdf1	1.12801	356	17604187
17685836	830	1.07953	Zbtb37	1.09329	364	17681325
17843424	7	1.0784	Zfp202	1.09386	1226	17843424
17605799	1161	1.0836	Zfp592	1.24669	143	17605795
17604685	6	5.12071	Zfp644	1.09301	317	17604631
17608413	391	1.1486	Zfyve26	1.28871	216	17608269
17609483	1251	1.09027	Zmym2	1.19682	971	17609483
17704830	1352	1.56949	Pcdh20	1.04666	1285	17704825
17808186	478	1.16865	Tle1	1.06865	757	17808188
17603751	340	1.10238	Dnajc8	1.12751	998	17603743

## Sheet: Common down
Probe_ID Female	Rank Female	Female BPA(0.5+50) vs FC (fold change)	Gene Symbol	Male BPA(0.5+50) vs MC (fold change)	Rank Male	Probe_ID Male
17834700	966	-1.05544	Aldh1l2	-1.12746	1298	17827234
17603577	132	-1.15731	Api5	-1.23382	639	17603621
17607829	50	-1.29312	Apip	-1.30243	783	17607905
17609949	1089	-1.12742	Ccz1b	-1.11779	1319	17609949
17800491	214	-1.36235	Dhcr24	-1.40957	1248	17800491
17696898	601	-1.11993	Dlg5	-1.2526	802	17781280
17845789	338	-1.06056	Dnaaf4	-1.07384	341	17845789
17668582	247	-1.07304	Hmgb2l1	-1.30422	286	17668584
17838798	593	-1.0564	Lrrc24	-1.0866	815	17838798
17788897	1116	-1.05473	Magi2	-1.31036	739	17780948
17675050	237	-1.11169	Map2k7	-1.15786	96	17675050
17860813	825	-1.11608	Nyap2	-1.06516	924	17860813
17619053	222	-1.0868	Olr59	-1.44868	572	17619058
17601989	181	-2.97254	P3h3	-1.28367	10	17602041
17606469	490	-1.61836	Pou6f1	-1.22919	378	17606587
17627742	1040	-1.04007	Taar7e	-1.05363	468	17627742
17630489	156	-1.06528	Tex101	-1.14772	577	17630489
17723019	691	-1.10574	Trim36	-2.16508	241	17723022

## Sheet: Common opposite
Probe_ID Female	Rank Female	Female BPA(0.5+50) vs FC (fold change)	Gene Symbol	Male BPA(0.5+50) vs MC (fold change)	Rank Male	Probe_ID Male
17603265	356	-1.05726	Ankrd17	1.38358	189	17603305
17603207	654	-1.0335	B4galt3	1.09508	797	17603173
17604569	608	1.30579	Bcap31	-1.48374	561	17604585
17600327	510	-1.08726	Becn1	1.21634	37	17600299
17728627	948	1.28094	Best2	-1.1245	1269	17728627
17606729	158	-1.12014	Bin2	1.14419	697	17606773
17759240	111	-1.09552	Ccdc162	1.75508	444	17755673
17797464	648	1.26594	Cngb3	-1.09814	465	17797445
17802139	1270	-1.04762	Col8a2	1.08174	578	17802139
17600547	47	-1.04423	Copb1	1.12855	41	17600601
17765071	974	-1.04468	Dll4	1.07878	1301	17765071
17606261	992	-1.08764	Eif4h	1.39392	148	17606227
17794121	1082	1.21286	Eno1	-1.14807	770	17646209
17703427	274	-1.05176	Fgf9	1.10968	222	17703427
17605487	121	-1.08502	Fto	1.2372	329	17605475
17789285	262	-1.04567	Fzd1	1.06936	167	17789285
17606887	288	-1.22055	Galnt6	20.3209	314	17606905
17600465	474	-1.10871	Gdi2	1.12975	349	17600501
17608649	1330	-1.67985	Gpbp1l1	1.07202	253	17608641
17699096	847	1.10521	Gzmbl2	-1.19498	325	17703220
17703186	960	1.18206	Gzmf	-1.25936	1055	17703186
17824855	78	-1.16274	Ig V	1.07114	62	17825043
17682317	999	-1.05582	Kmo	1.09041	801	17682317
17600865	777	-1.02686	Lpcat3	1.11504	551	17600805
17616918	155	1.47628	Luzp2	-1.19261	1300	17633381
17663879	941	-1.03932	Mir338	1.06705	1044	17663879
17824346	1140	1.19675	Mir3592	-1.16869	1261	17824346
17731446	934	-1.05161	Mmp15	1.07904	643	17731446		0.237288
17605917	373	-1.20112	Mrps26	1.17277	1215	17605923
17821091	956	-1.07913	Mycn	1.12153	300	17821089
17644009	496	-1.05485	Nlrc3	1.09522	654	17644009
17880186	127	2.3185	Olr1471	-1.36299	1307	17658477
17618069	942	1.2116	Olr27	-1.55517	598	17634774
17605651	433	-1.07733	Osbpl2	1.36067	162	17605597
17718771	1336	-1.06648	Phactr1	1.09063	141	17718771
17600941	711	-2.00126	Phb2	1.41007	648	17600899
17604061	326	-1.02566	Ptdss1	1.17565	424	17604113
17608859	596	-1.07889	Rnf111	1.07451	212	17608857
17714898	287	-1.16936	Rnf144b	1.01648	454	17714900
17851355	185	-1.17591	Rps2	1.13037	138	17644349
17602537	1250	-1.0535	Sar1a	1.02911	1250	17602545
17839665	92	-1.06881	Shisal1	1.14152	493	17839665
17710343	461	-1.04002	Shld2	1.15599	303	17710346
17883003	1016	-1.10394	Slc22a22	1.23282	203	17829493
17604235	849	-1.08138	Slc35c1	1.08996	1031	17604229
17671409	735	1.2756	Stard13	-1.33194	619	17671409
17606167	344	-1.06954	Stx16	1.32661	427	17606177
17603043	193	-1.10752	Tcea1	1.12233	139	17602983
17615374	1070	-1.02484	Tex14	1.1082	194	17649962
17606363	182	-1.12311	Tfcp2	1.61145	593	17606303
17609909	200	-1.12471	Tm2d1	1.279	19	17609869
17604043	450	-1.11463	Tm9sf2	1.50656	238	17603983
17652674	787	1.95686	Tmem94	-2.18903	320	17652674
17702407	248	-1.07525	Trav6-2	1.02423	1249	17698522
17782860	1332	-1.05632	Trbv13-2	1.09722	545	17782860
17802718	604	1.21369	Trnp1	-1.30111	1217	17802718
17602687	558	1.10501	Uba1	-1.17451	1088	17602687
17631448	1249	-1.04215	Zfp27	1.04576	1019	17631443
17695991	577	-1.04885	Znrf3	1.07324	107	17695991

## Sheet: Female up
Probe_ID	Gene Symbol	Female BPA(0.5+50) vs FC (fold change)	Rank F
17872953	Ar	1.1577	1
17876562	Trpc5	1.34456	2
17839704	Mir1249	1.36958	3
17665185	Col8a1	2.08429	9
17626033	Hps6	1.10147	10
17764621	Olr757	1.28254	11
17702281	Trav12-3	1.12051	14
17787463	Tspan11	1.17385	15
17640302	Gng3	1.16418	24
17869149	Acsbg3	1.09406	26
17810722	Gjb5	1.11205	32
17761755	Olr396	1.14498	34
17825916	Olr1049	1.20203	39
17881739	Nfkb1	1.27622	41
17712710	Defa10	1.07381	43
17880285	Cdc7	1.10401	44
17760106	Kcnt1	1.1151	45
17850594	Dpy19l2	1.07389	49
17763636	Olr546	1.3571	52
17818103	Ppp4r4	1.07992	54
17612416	Vom1r3	1.72463	58
17738332	Arhgap20l	1.18821	59
17662644	Cacng1	1.10757	61
17679279	Cntnap5a	1.22274	64
17604483	Mrpl21	15.9066	70
17664440	Adamts5	2.07701	71
17781965	Impdh1	1.28193	72
17815821	Nubpl	1.07216	74
17877899	Asb12	1.37077	75
17856610	Lyzl4	1.12478	80
17748264	Rbm46	1.16911	85
17863213	Crisp4	1.16855	86
17872106	Egfl6	1.17265	89
17612972	Nlrp9	1.10786	97
17786457	Zfp422	1.32799	99
17620691	Tbx6	1.1163	100
17763041	Evx2	1.09268	102
17764822	Tmco5a	1.10286	108
17806163	Mms22l	1.62445	110
17841793	Msantd4	1.14291	115
17871172	Eras	1.15608	116
17693741	Dzip1-ps1	1.06838	117
17724160	Me2	1.07916	119
17670072	Rtp4	1.11764	120
17854027	Tmod2	1.10607	123
17763192	Nell1	1.38021	124
17725255	Tafa2	1.1138	125
17700158	Gtf2f2	1.03673	134
17876868	Shroom2	1.15501	135
17667230	Ccdc116	1.18914	138
17610855	Aldh8a1	1.12363	140
17622593	Shank2	1.2422	146
17787645	Tas2r120	1.25042	150
17864415	Tmeff2	1.10025	153
17742235	Plppr5	1.27314	157
17624985	Mbl2	1.12022	165
17831126	Septin3	1.08482	170
17669344	Csta	1.19597	173
17842256	Olr1165	1.35599	174
17880351	Ddhd1	1.0717	176
17672685	Pilrb2	1.26968	177
17703439	RGD1563302	1.10699	180
17653713	Atf7ip2	1.11129	190
17666753	Plch1	1.17884	195
17872079	Prps2	1.15375	199
17744392	S100z	1.06363	201
17723744	Piezo2	2.51705	204
17873405	Nexmif	1.21614	205
17831119	Srebf2	1.11726	207
17861793	Ppp1r7	1.74792	210
17790891	Prss37	1.10668	212
17724639	Cbln2	1.09576	215
17726532	Ppargc1b	1.17284	216
17879617	Mir743a	1.16757	225
17880483	Rasa1	1.06195	227
17616249	Tead2	1.13182	228
17644371	Hs3st6	1.15571	229
17843197	Vsig2	1.09695	230
17879340	Mir19b2	1.18291	233
17725351	Rps27a-ps28	1.02397	234
17861862	Farp2	1.82239	240
17763607	Olr475	1.0815	242
17777472	Psmb3	1.68817	243
17655264	Ranbp17	1.11381	245
17882663	Gckr	1.10758	254
17880802	Ttc6	1.13441	255
17849503	Cntn5	1.12433	257
17786036	Jagn1	1.55673	260
17883039	Dlg5-ps1	1.06125	261
17784332	Eif2ak3	1.71628	263
17619421	Olr264	1.08444	264
17882003	Gpr6	1.09073	266
17736124	Rpl37	1.1525	267
17642925	Gucy2g	1.14366	269
17647227	Mfsd6l	1.11296	270
17660303	Itga3	1.12558	273
17837695	Adcy8	1.05535	276
17677988	Myl2	1.29286	278
17720057	Snrpn	1.11687	280
17637632	Fgfr2	1.11434	292
17791413	Evx1	1.05253	296
17746334	Chmp4c	1.07875	299
17678750	Ankrd13a	1.13066	301
17799004	Cox6b1-ps1	1.05979	308
17865434	Cxcr1	1.56677	310
17741796	Kcna10	1.04133	312
17730310	Cntnap4	1.17429	316
17849291	Gria4	3.44433	317
17881557	Scaf8	1.235	318
17724218	Cfap53	1.29584	321
17832714	Hoxc10	1.20399	332
17676538	Mcm7	1.09707	333
17601685	Tpi1	1.14243	334
17780194	Zbtb46	2.86388	335
17635082	B3gnt6	1.08768	355
17711471	Aadat	1.11897	359
17806396	Mir873	1.42468	361
17611410	Zfp273l-ps1	1.03043	367
17762099	Lypd6b	1.15928	368
17766772	Otor	1.08819	370
17604805	Txndc15	1.27638	374
17843365	Olr1271	1.13085	375
17684462	Arl8a	1.09361	377
17871554	Rps9	1.05242	382
17654267	Prss27	2.83078	384
17818430	Mir1188	1.06253	386
17695867	Hormad2	1.23545	389
17842249	Olr1163	1.1351	394
17870901	Ddx3x	1.35347	398
17834277	Zfp871	1.28195	407
17883011	Srgap1	1.36226	408
17689669	Gabra2	1.14442	412
17658498	Olfr394	1.74437	414
17614456	B3gnt8	1.09523	417
17723497	Adamts19	1.11392	418
17808103	Tlr4	1.12531	420
17616728	Nav2	1.07011	424
17805604	Rps20	1.12038	428
17668044	Cldn14	1.05637	429
17707014	Kcnn1	1.13131	432
17843379	Olr1308	1.06877	441
17807281	Olr853	1.09075	443
17666531	Tmem207	1.30224	444
17829929	Psca	1.07442	446
17878568	Sh3bgrl3	1.07435	452
17667697	Cct8	1.14026	453
17640803	Olr325	1.13164	454
17777957	Nkx2-2	1.51554	455
17610966	Tmem200a	1.04723	467
17735454	Cartpt	20.6729	469
17705169	Slitrk5	1.22136	472
17791722	Hpgds	1.12776	476
17667433	Gbe1	1.1426	477
17601643	Lrrc23	1.19655	480
17624333	Olr347	1.21311	482
17664503	Krtap13-2	1.14455	483
17741393	Casq2	1.08285	488
17816066	Fbxo33	1.10995	489
17815471	Agr3	1.16914	491
17687414	Gapdh	1.07225	498
17625288	Cpeb3	1.07095	513
17697502	Atxn7	1.08036	518
17823045	Sipa1l1	1.32167	520
17654238	Zg16b	1.07295	521
17769288	Tfap2c	1.06205	523
17735559	Adamts6	1.09774	524
17719505	Abt1	1.10915	527
17856878	Slc5a7	1.13018	529
17871530	Gucy2f	1.14694	530
17798910	Olr841	1.36306	533
17763760	Olr725	1.20849	535
17624768	Smarca2	1.20387	538
17876731	RragB	1.05489	542
17604759	Gtf2h5	1.063	543
17722461	Slc4a9	1.03448	548
17880497	Tmem258	1.10703	549
17701451	Fam3d	1.06976	553
17645787	Shroom1	1.10973	555
17791727	Prdm5	1.48576	560
17838637	Scrt1	1.09922	562
17737657	Actrt3	1.13508	564
17867031	Mtcl1	1.12448	566
17808373	Frem1	1.10414	569
17737211	Fabp9	1.10081	570
17656473	Olr1422	1.31993	571
17740709	Psmb4	1.12655	575
17712060	Prag1	1.11011	584
17852932	Ppcdc	1.24519	590
17857881	Crisp2	1.20371	597
17745564	Ghr	1.06688	600
17865872	Fam124b	1.09142	605
17626334	Sfr1	1.37507	606
17623368	Cdc42bpg	1.11902	610
17760437	Dbh	1.19261	612
17882597	Vti1a	1.21399	614
17733821	Adamts18	1.11415	618
17812315	Aadac	1.26857	619
17651099	Zfp385c	2.26334	620
17604269	Sem1	1.21659	622
17835302	Rpl31l3	1.08719	623
17790133	Pax4	1.13821	625
17752323	Olr1744	1.14825	630
17689793	Uchl1	1.03336	631
17823538	Gtf2a1	1.03717	634
17734026	Emc8	1.13234	639
17761617	Cuta	1.07446	649
17829203	Abra	1.03725	652
17712094	Mfhas1	1.10938	653
17629072	Zfp665-like	1.41577	664
17666434	Hes1	1.14772	669
17874091	Nrk	1.17446	674
17793995	Rpl32	1.06792	680
17867300	Mt-co2	1.04771	684
17719593	Olr1660	1.19496	693
17635565	Olr104	1.27606	694
17630241	Cd3eap	1.04146	698
17687846	Tmed11	1.355	704
17778058	Cst3	1.37126	716
17722250	Camk4	1.08885	722
17642793	Sorcs3	1.07181	724
17847353	Grm2	1.05766	726
17876548	Htr2c	1.21254	729
17764253	Lrrc4c	1872.2	730
17660859	Wipf2	1.28803	733
17739110	Schip1	1.17618	737
17735635	Zswim6	1.11239	739
17829038	Odf1	1.09618	746
17793700	Cntn6	1.14061	749
17656531	Obscn	1.09833	750
17690531	Wfs1	1.05099	756
17805654	Ptp4a2	1.21992	763
17688647	Ccdc158	1.081	768
17797387	Calb1	1.52048	769
17746435	Bhlhe22	1.06553	773
17797639	Gpr63	1.27262	775
17615597	Tdrd12	1.07374	776
17828153	Nap1l1	1.14107	781
17789272	Tex47	1.14567	784
17880162	Elob	1.15861	794
17638713	Nap1l4	1.05459	796
17863204	Cdh12	1.03965	802
17602747	Cdc42	1.18316	803
17763595	Olr468	1.28148	806
17808681	Mysm1	1.32004	809
17727681	Cdh11	1.09649	810
17685342	Rgsl1	1.44023	811
17819748	Arhgef33	1.18705	816
17715197	Cage1	1.07738	820
17711151	Zfp868	1.16586	824
17675915	Nptx2	1.07106	827
17799873	Fggy	1.23774	829
17791729	RSA-14-44	1.5249	832
17880638	Ptgs1	1.12527	842
17724523	Setbp1	1.08713	848
17689259	Tecrl	1.27729	850
17667474	Robo2	1.11531	851
17844818	Larp6	1.06944	852
17653796	Tmem114	1.02607	853
17774236	Olr604	1.0915	856
17763974	Acp2	1.27811	857
17686894	Olr1592	1.06349	858
17774120	Olr482	1.17786	861
17671901	Spdye4	1.04384	863
17863648	Prim2	1.3421	870
17758137	Ank3	1.09957	873
17659949	Ankfn1	1.10105	875
17700729	Rap2a	1.08934	877
17677535	Atp6v0a2	1.09361	882
17714226	Gkap1	1.1571	888
17799408	Mir3084c	1.10776	894
17737823	Dnajc19	1.20073	895
17779671	Zfp93	1.19198	896
17831219	Mpped1	1.12548	898
17825876	Olr950	1.44922	900
17778053	RGD1563136	1.34241	905
17855794	P4htm	1.27886	913
17664755	Mir802	1.25715	914
17617570	Mrps11	1.06437	916
17812310	Aadacl4	1.12863	918
17804303	Casz1	1.08707	921
17765685	Sema6d	1.08644	922
17690397	Hmga2	1.03294	923
17668348	Nsun3	1.05991	926
17788294	Rps4y2	1.09971	928
17839345	Chadl	1.06556	929
17880220	Lsamp	1.09053	930
17771869	Wdr38	1.05402	936
17846174	Col12a1	1.06799	945
17605731	Trappc2l	1.10652	947
17710348	Fam25a	1.12701	950
17741221	Adam30	1.03609	959
17825894	Olr990	1.13398	965
17843147	Hepacam	1.08013	970
17631210	Ryr1	1.09128	972
17638072	Mir202	1.60706	975
17878870	Zmat1	1.04771	991
17610361	Rrlt	1.04667	1008
17738052	Ankrd50	1.07665	1018
17767250	Nsfl1c	1.12935	1019
17808857	Cachd1	1.1055	1022
17734805	Erap1	1.05017	1023
17850645	Eepd1	1.10441	1035
17640851	Olr343	1.14606	1039
17875518	Lonrf3	1.20674	1042
17661181	Krt33b	1.25261	1043
17629276	Mir294	2.32731	1049
17631334	Spred3	1.07961	1054
17779149	Wfdc5	1.173	1057
17749165	Sprr2h	1.06964	1065
17698236	Trav2	1.10111	1066
17867541	Vom2r76	1.11787	1069
17602195	Dad1	1.24576	1077
17835987	Lyz	1.04234	1079
17793891	Atp2b2	1.11335	1083
17658493	Olr1496	1.07287	1087
17747002	Il2	1.11273	1088
17851407	Bsx	1.06007	1091
17772949	Scn7a	1.09291	1101
17801023	Skint10	1.05874	1102
17714036	Tut7	1.03343	1104
17616926	Siglech	1.08926	1106
17709862	Gnl3	1.08957	1107
17870578	Akap14	1.19437	1115
17723511	Chsy3	1.06066	1126
17817742	Dio2	1.15108	1128
17640636	Ms4a18	1.15526	1131
17634978	Tenm4	1.16129	1133
17619955	Acsm2a	1.0786	1134
17806434	Ndufb6	1.0431	1143
17785904	Lmod1	1.27644	1145
17856249	Stt3b	1.07492	1160
17741423	Sycp1	1.13068	1162
17723396	Ctxn3	1.10458	1167
17764604	Olr748	1.08193	1168
17857965	Gsta2	1.10734	1173
17880418	Amph	1.06587	1181
17689949	Rell1	1.26828	1182
17709056	Defb38	1.20127	1185
17630496	Cd177	1.11649	1186
17720684	Sfmbt2	1.05966	1187
17868539	Nid2	1.41723	1188
17714890	Mirlet7f-1	1.34835	1193
17878615	Satl1	1.11931	1201
17652606	Kctd2	1.0493	1202
17625512	Cyp2c22	1.04383	1207
17664172	Rab40b	1.05639	1211
17811793	Pla2g2a	1.07508	1214
17810192	Mir30c1	1.0953	1215
17611052	Taar8c	1.05094	1217
17876534	Mir1912	1.19095	1218
17778090	Cst4	1.16774	1221
17882581	Emcn	1.20428	1222
17644642	Mslnl	1.13721	1223
17779182	Slpil3	1.34799	1227
17665377	Zpld1	1.13404	1228
17742929	Ppp3ca	1.13605	1236
17818685	Mir300	1.0526	1238
17801684	Guca2b	1.0488	1239
17836828	Fbxo43	1.15034	1240
17754697	Dynlt2b-ps1	1.22801	1245
17737281	Stmn2	1.05572	1253
17842260	Olr1169	1.21269	1255
17735051	Cox7c	1.15024	1259
17756404	Ly6g5c	1.10443	1262
17853515	Parp16	1.28729	1263
17850691	Bin2a	1.08873	1266
17698231	Olr1643	1.05585	1272
17737579	Slc2a2	1.06178	1273
17634958	Rab30	1.10609	1282
17667929	Dnajc28	1.07276	1288
17814960	Odc1	1.10245	1292
17620522	Rps15a	1.46568	1294
17809493	Lurap1	1.17904	1295
17729917	Pkd1l3	1.06558	1297
17881048	Tes	1.13385	1298
17871383	Lrch2	1.12	1302
17827479	Nr1h4	1.04199	1304
17880955	H3-2	1.05253	1306
17766921	Slc24a3	1.13898	1310
17792133	Smyd1	1.09114	1334
17808430	Ccdc171	1.07918	1335
17723641	Pde6a	1.0981	1337
17621282	Plpp4	1.11756	1341
17701826	Ktn1	1.22479	1344
17813079	Ajap1	1.08838	1345
17661238	Krt15	1.06024	1351
17601001	Ptpn6	1.07967	1355
17811325	Catsper4	1.11117	1357
17795746	Tas2r114	1.27067	1361
17851866	Ift46	1.1338	1364
17881817	Amt	1.07648	1367
17647353	Borcs6	1.08988	1368
17677771	Lrrc43	1.10372	1369
17855784	Mir3555	1.12349	1373
17686241	Adcy10	1.18796	1374
17872998	Mir3573	1.89117	1378

## Sheet: Female down
Probe_ID	Gene Symbol	Female BPA(0.5+50) vs FC (fold change)	Rank F
17727712	Got2	-1.43289	4
17626893	Ces2i	-4.79638	5
17879512	Fgf13	-1.08656	16
17814334	Dpysl5	-1.11837	19
17770130	Noxa1	-1.10238	21
17764518	Kcna4	-1.12882	22
17881939	Zfp75-like	-1.07443	23
17840679	Olr287	-1.06294	25
17799810	Elavl2	-1.08146	27
17697622	Fam107a	-1.14936	28
17840689	Zfp641	-1.10004	29
17882261	Krtap24-1	-1.15232	30
17604799	Txndc15	-1.37967	35
17657885	Spem2	-1.10205	36
17778324	Defb29	-1.08034	37
17764288	Pamr1	-1.09609	40
17797213	Chd7	-1.16031	42
17791329	Npvf	-1.11706	46
17670081	Rtp1	-1.05827	53
17862356	Yes1	-1.09409	55
17767047	Pax1	-1.14873	56
17811841	Pax7	-1.07843	57
17623958	Best1	-1.26383	60
17648707	Glod4	-1.08609	63
17853371	Iqch	-1.06886	65
17639613	Ovol1	-1.14606	66
17651595	Eftud2	-1.17502	67
17763172	Pjvk	-1.08472	68
17846985	Amotl2	-1.04576	73
17774148	Olr505	-1.08123	76
17857689	Znrd1as1	-1.19352	77
17633882	Igf1r	-1.14779	79
17728879	Adgrl1	-1.21591	81
17840384	Nell2	-1.05844	82
17878161	Cited1	-1.1132	84
17843707	Kmt2a	-1.09629	87
17754673	Rpp40	-1.0657	90
17762178	Dppa5	-1.13948	91
17842699	Bmper	-1.13808	93
17685434	Mr1	-1.05991	94
17622566	Cars1	-1.15321	95
17705538	Tra29	-1.06805	96
17712292	Rpl36	-1.40392	101
17606611	Dazap2	-1.06368	103
17757333	Ccdc167	-1.06161	106
17807890	Zfp37	-1.07725	109
17766080	Fbln7	-1.25549	112
17875847	Chst7	-1.06898	114
17829856	Ptk2	-1.15213	118
17794908	Lag3	-1.10168	130
17848271	Prss44	-1.11509	131
17796078	Aebp2	-1.07696	133
17610516	Utrn	-1.07403	136
17873704	H2ab3	-1.04977	139
17767085	Cst12	-1.26216	141
17735683	Pde4d	-1.04716	142
17662347	Ace	-1.0812	143
17810714	Gja4	-1.06906	144
17877718	Mageb18	-1.11159	145
17659365	Heatr9	-1.14887	147
17649130	Abhd15	-1.05335	151
17736692	Cdh12	-1.10515	154
17751175	Mettl14	-1.09821	159
17659942	Nog	-1.11622	160
17877649	Il1rapl1	-1.0911	162
17808518	Mllt3	-1.15188	163
17649180	Nsrp1	-1.07857	171
17629290	Mir290	-1.135	172
17838598	Mroh1	-1.07926	178
17873738	Nap1l3	-1.16539	179
17874027	Spcs3	-1.10203	184
17624339	Olr354	-1.08614	186
17774325	Olr690	-1.18061	187
17744705	Cartpt	-1.05708	189
17881771	Ceacam12	-1.1321	192
17686990	Cep170	-1.14548	194
17851813	Upk2	-1.07995	196
17689947	Mir328b	-1.03687	197
17637274	Tlcd3b	-1.27648	198
17690484	Nsg1	-1.0661	202
17842866	Aplp2	-1.33587	203
17846260	Irak1bp1	-1.05332	206
17731182	Ntpcr	-1.07405	213
17601129	Atn1	-2.69471	217
17815742	Atp5mc1	-1.08403	219
17601075	Ptpn6	-1.08516	220
17766023	Spdye4	-1.21933	223
17824656	Mta1	-1.0879	224
17795358	Clec2e	-1.06233	226
17813036	Hes3	-1.09014	235
17654249	Prss30	-1.05751	236
17733825	Dynlrb2	-1.11267	238
17882831	Tctn2	-1.09463	239
17715332	Tubb2a	-1.0865	241
17877638	Mageb3	-1.08834	244
17671144	Dync1i2	-1.09053	249
17642527	Pitx3	-1.06323	250
17788192	Arntl2	-1.0621	252
17634626	Cfap161	-1.15489	253
17841714	Mucl2	-1.06813	258
17676959	Srrm3	-1.04651	259
17806938	Olr833	-1.22917	265
17774863	Lrrc4c	-1.12757	271
17754983	Pcbd1	-1.13141	272
17645017	Mir218-2	-1.2457	275
17818407	Rtl1	-1.16383	277
17877456	Cldn34e	-1.13384	282
17635528	Olr51	-1.10885	283
17643139	Vax1	-1.05947	284
17779078	Jph2	-1.1028	285
17634523	Fsd2	-1.18475	291
17689278	Adgrl3	-1.46875	304
17726735	Rpl31	-1.05272	306
17708049	Fat1	-1.93387	307
17763689	Olr594	-1.1716	311
17680423	Tnni1	-1.1507	315
17639986	Kcnk4	-1.26286	322
17794815	Lrrc23	-1.16785	323
17750735	Amy2a3	-1.03228	324
17801896	Pou3f1	-1.08642	327
17870567	Alx3	-1.0731	328
17702506	Trav12-3	-1.0692	330
17683261	Irf6	-1.05408	331
17707428	Npy5r	-1.10005	336
17685599	Axdnd1	-1.14899	337
17795801	Tas2r103	-1.18028	339
17817338	Dnal1	-1.04581	341
17622119	B4galnt4	-1.06486	343
17830795	Fam83f	-1.12151	345
17724626	Neto1	-1.10965	346
17882207	Tspan7-like	-1.07132	347
17743049	Adh1-ps1	-1.13932	348
17768732	Kcnk15	-1.08439	350
17739843	Mex3a	-1.03625	351
17813301	Mxra8	-1.09994	352
17654396	Dnase1l2	-1.20848	353
17744336	Pde8b	-1.09279	354
17782679	Tas2r137	-1.16441	358
17651028	Krtap31-1	-1.11364	360
17708420	Unc5d	-1.11075	364
17655496	Mat2b	-1.09615	365
17623944	Scgb2a2	-1.09594	366
17703511	Atp8a2	-1.05007	369
17827996	Ppfia2	-1.0684	371
17652017	Ace3	-1.10991	372
17764450	Pax6	-1.13062	376
17831711	Syt10	-1.14969	378
17638177	Cyp2e1	-1.06768	379
17782216	Cpa5	-1.09021	380
17737825	Sox2	-1.24256	381
17672343	Azgp1	-1.03682	383
17845526	Rora	-1.0749	385
17681241	Rabgap1l	-1.07156	390
17874481	Gpc4	-1.05138	393
17824116	Serpina3a	-1.04416	395
17612974	Vom1r37	-1.23847	396
17768497	Dhx35	-1.11432	397
17800635	Glis1	-1.09732	399
17857472	Gnmt	-1.1045	400
17657249	Arhgap44	-1.03853	404
17611421	Iyd	-1.04063	405
17744616	Tmem171	-1.06985	406
17760196	Obp2a	-1.06562	409
17709248	Atp4b	-1.06977	413
17761795	Olr423	-1.09242	415
17602575	Polr2e	-1.10328	419
17754651	Bicc1	-1.0704	421
17835652	Syt1	-1.2008	422
17848898	Mobp	-1.04481	423
17842798	Igsf9b	-1.04342	425
17635673	Olr150	-1.20379	426
17846278	Elovl4	-1.0973	427
17649132	Tp53i13	-1.07401	430
17684169	Nfasc	-1.0902	438
17762220	Fmnl2	-1.12103	439
17768668	Tox2	-1.09059	445
17791704	Ccser1	-1.26616	448
17826812	Cyp4f4	-1.11519	451
17864988	Cd28	-1.0901	456
17613318	Vom1r44	-1.26748	457
17699417	C1qtnf9	-1.24441	458
17624558	Trpm3	-1.14892	459
17720009	Odad2	-1.06876	463
17842292	Zfp846	-1.07315	468
17824049	Serpina1f	-1.17263	470
17685238	Lamc2	-1.1416	471
17747548	Erich6	-1.08131	473
17760312	Abo3	-1.05325	475
17824352	RGD1305298	-1.06993	479
17744314	Bhmt2	-1.07728	481
17723928	Rax	-1.05955	484
17797967	Ifnk	-1.11282	486
17665967	Fbxo40	-1.0779	487
17636421	Calca	-1.10904	492
17880901	Lca5	-1.14233	495
17882705	Mep1b	-1.11237	497
17813704	Plekhh2	-1.04569	499
17619437	Nlrp10	-1.07705	500
17697116	Mss51	-1.05696	502
17600395	Lypla2	-1.13179	503
17821011	Klhl29	-1.07278	504
17803896	Epha2	-1.06533	505
17842847	Adamts8	-1.09548	506
17693376	Sdad1	-1.06755	507
17820421	Clip4	-1.10474	508
17796611	Mapkap1	-1.02724	509
17807538	Txndc8	-1.0545	512
17861671	Olr1349	-1.08285	514
17804058	Vps13d	-1.09404	515
17675597	Uspl1	-1.07067	516
17618059	Olr19	-1.16849	517
17794339	Wnt5b	-1.10598	519
17735842	Mcidas	-1.08459	522
17810194	Mir30e	-1.14239	525
17660702	Cacnb1	-1.03593	526
17810547	Trappc3	-1.07648	532
17754230	Lrrc3	-1.0794	536
17854667	Plscr2	-1.08743	537
17766552	Bmp2	-1.11642	540
17644331	Noxo1	-1.08126	541
17664320	Robo2	-1.10977	544
17679373	Tnfrsf11a	-1.14673	546
17825276	Sp8	-1.03906	547
17863712	Prss40	-1.07173	550
17851823	Cxcr5	-1.0536	552
17633198	Hps5	-1.07972	556
17712437	Sfrp1	-1.09284	561
17746202	Zfp712	-1.04947	565
17804140	Nppa	-1.07236	568
17808538	Ifna16l1	-1.14299	573
17864351	Gls	-1.03617	574
17864155	Pantr1	-1.0936	580
17870833	Ndp	-1.03544	582
17741359	Trim45	-1.03295	583
17825279	Abcb5	-1.11057	587
17672878	Ssc4d	-1.08136	588
17805295	Ncoa2	-1.05953	591
17787797	Gucy2c	-1.04952	607
17787813	Pde6h	-1.03191	609
17763083	Hoxd3	-1.12123	613
17855397	Iqcf4	-1.06149	621
17780265	Bdnf	-1.0657	624
17823003	Adam4l1	-1.06379	627
17792677	Cd207	-1.15273	629
17725943	Grxcr2	-1.08049	632
17774051	P2rx3	-1.04981	635
17725991	Gpr151	-1.12915	636
17876715	Col4a6	-1.08126	644
17689351	Nmu	-1.06138	645
17827113	Fbxo7	-1.07662	646
17646399	Drc3	-1.13312	655
17774283	Olr657	-1.14359	656
17775034	Lmo2	-1.08987	657
17791554	Neurod6	-1.20168	659
17697062	Synpo2l	-1.05576	660
17601181	Eno2	-1.06427	661
17617952	Adamtsl3	-1.06814	663
17734793	Ces5a	-1.08582	666
17629546	Ccdc106	-1.08466	667
17829984	Zc3h3	-1.03521	670
17876870	Shroom2	-1.04204	671
17880505	Tdpoz3	-1.17796	672
17665130	Olr1546	-1.03767	673
17781921	Fscn3	-1.0523	675
17682099	Igsf8	-1.04048	676
17791390	Hoxa7	-1.06425	678
17611785	Acat2	-1.08545	679
17636019	Ric3	-1.10324	686
17734535	Irf2bp2	-1.10661	689
17606647	Smagp	-7.44725	690
17831539	Mov10l1	-1.08914	692
17724855	Tmem241	-1.4563	696
17637493	Stx1b	-1.05218	697
17669860	Pigz	-1.04869	700
17635738	Olr193	-1.11152	701
17738401	Slc7a11	-1.13068	703
17661189	Krt34	-1.08526	705
17704941	Klf12	-1.06044	706
17797004	Npbwr1	-1.04476	710
17785030	Spr	-1.08058	713
17678372	Spring1	-1.08144	714
17602779	Cdc42	-1.05541	721
17632211	Cdc42se2	-1.07247	727
17723923	Cplx4	-1.10202	728
17625488	Cyp2c18	-1.17242	732
17609935	Ccz1b	-1.09545	736
17652951	Mettl23	-1.03966	738
17855546	Lsmem2	-1.10294	740
17718233	Unc5a	-1.06758	741
17689138	Tmprss11g	-1.10053	742
17844098	Arhgap20	-1.07588	745
17690171	Lgi2	-1.0918	747
17839120	Baiap2l2	-1.04098	748
17819850	Slc8a1	-1.20762	751
17851421	Crtam	-1.07715	753
17653798	Tmem114	-1.12224	755
17843235	Olr1203	-1.35982	760
17712678	Defb1	-1.16462	761
17876097	H2ap	-1.05357	762
17837137	Sybu	-1.0702	764
17724174	Mapk4	-2.15126	767
17779825	Phactr3	-1.06849	770
17857172	Foxp4	-1.0462	771
17818835	Zfp839	-1.04722	772
17815747	Atp5a1	-1.06052	774
17824318	Wdr25	-1.0765	780
17650552	Hoxb1	-1.0859	783
17774210	Olr552	-1.05002	785
17619435	Olr276	-1.21583	786
17881435	Zbtb7c	-1.12446	788
17719224	Cdkal1	-1.06429	789
17872065	Msl3	-1.11228	791
17851246	Olr1279	-1.05359	792
17880589	RT1-CE11	-1.04158	793
17813354	Mir429	-1.16265	795
17850316	Ap1m2	-1.16447	799
17613529	Vps13a	-1.08744	800
17721665	Cdh2	-1.08506	801
17723667	Mir3557	-1.49773	804
17613757	Ccdc8	-1.09856	805
17834450	Olr1096	-1.39671	807
17635080	Omp	-1.0873	808
17753402	Ilrun	-1.04193	812
17629867	Vom2r33	-1.22991	813
17745976	Pdzd2	-1.12807	814
17878909	Bex2	-1.1015	817
17705163	Slitrk6	-1.41025	818
17674212	Oas1e	-1.11519	819
17797006	Rgs20	-1.106	822
17674395	Tmem233	-1.0525	823
17828407	Grip1	-1.08811	833
17816841	Sptb	-1.10259	835
17688247	Hsd17b13	-1.06428	836
17742633	Cfi	-1.03231	837
17670580	Olr1569	-1.06321	839
17848689	Mir26a	-1.05396	840
17611503	Ccdc170	-1.07514	841
17666510	Fgf12	-1.19484	843
17809486	Nsun4	-1.10042	844
17781889	Spam1	-1.10729	846
17882473	Or13p8b	-1.08431	855
17615434	Sbsn	-1.10812	860
17715355	Serpinb6	-1.10263	862
17612978	Vom1r38	-1.2032	864
17866346	Iqca1	-1.07588	865
17781529	C1galt1	-1.09052	867
17789144	Sema3d	-1.37166	872
17656988	Rnf112	-1.05723	876
17687254	Lbr	-1.03832	880
17878760	Trmt2b	-1.06883	881
17765325	Stard9	-1.04491	883
17767488	Xkr7	-1.11377	884
17882335	Ces2f	-1.10051	885
17690185	Ccdc149	-1.04463	886
17638074	Spef1	-1.04869	887
17680867	Ivns1abp	-1.07808	891
17878238	Dmap1-ps5	-1.18954	892
17705556	Trav8-3	-1.06188	893
17841318	Krt82	-1.0415	899
17847203	Col6a4	-1.07438	901
17831021	Ndufb11	-1.20468	906
17881601	Macrod2	-1.058	907
17880121	Dmrtc1a	-1.07602	908
17651280	Cntd1	-1.07434	909
17684944	Gapdh-ps17	-1.14502	910
17809798	Artn	-1.12854	912
17763067	Hoxd8	-1.11015	919
17793412	Magi1	-1.07349	920
17777209	Pdyn	-1.08098	927
17874195	Cldn2	-1.05452	931
17780369	Dpp6	-1.05074	938
17660032	Kif2b	-1.09577	943
17760090	Lcn11	-1.23	944
17700468	Tbc1d4	-1.13995	946
17693277	Pramel12	-1.24064	951
17622979	Ccdc87	-1.11648	952
17633780	Tars3	-1.26292	954
17843411	Olr1337	-1.09336	957
17648065	Spns3	-1.03395	958
17775749	Ppp1r14d	-1.17382	961
17843290	Olr1237	-1.09743	962
17840683	Olr1877	-1.1499	963
17674232	Rita1	-1.06075	967
17845663	Aldh1a2	-1.09632	973
17684952	Pla2g4a	-1.63935	981
17682865	Tlr5	-1.02891	982
17872725	Mageb2	-1.05624	983
17749022	Creb3l4	-1.09198	994
17665014	Ripk4	-1.08205	995
17777302	Slc4a11	-1.07055	996
17733582	Exosc6	-1.05274	997
17881821	Iqcm	-1.10054	1000
17702030	Rnase11	-1.09823	1003
17882635	Avil	-1.04639	1004
17681666	Gpa33	-1.11399	1005
17734045	Zcchc14	-1.03616	1006
17610457	Ust	-1.05663	1007
17689771	Bend4	-1.04503	1009
17782095	Smo	-1.06649	1014
17856953	Efhb	-1.11394	1020
17614552	Cyp2b12	-1.05083	1024
17690533	Wfs1	-1.04995	1026
17664328	Rbm11	-1.06446	1029
17738003	Adad1	-1.13398	1030
17882703	Kdr	-1.03584	1031
17862441	Sult1c2	-1.09122	1032
17659584	Ppm1d	-1.07432	1033
17613753	Pnmal1	-1.05919	1034
17742246	Dpyd	-1.09412	1036
17795893	Grin2b	-1.07346	1037
17785460	Iqsec1	-1.14049	1038
17608495	Rad51b	-1.2845	1041
17777985	Cd93	-3.99842	1044
17815439	Prps1l1	-1.15445	1045
17737285	Il7	-1.18051	1046
17695800	Dusp18	-1.04515	1047
17681407	Mir214	-1.02831	1048
17635954	Cdv3	-1.10393	1052
17792762	Rab11fip5	-1.03635	1053
17804305	Casz1	-1.06751	1055
17778982	Ppp1r16b	-1.0363	1060
17783099	Arhgef5	-1.05525	1061
17778123	RGD1565143	-1.05752	1062
17826613	Hcn2	-1.06095	1063
17612556	Vom2r13	-1.08314	1064
17703296	Msantd5-ps1	-1.10193	1067
17880410	Simc1	-1.08219	1068
17802918	Extl1	-1.10545	1071
17654512	Slc9a3r2	-1.06796	1072
17845434	C2cd4b	-1.10262	1075
17674510	Sppl3	-1.0535	1076
17730578	Klhl36	-1.04537	1081
17806133	Nkain3	-1.13555	1084
17659474	Lhx1	-1.10653	1085
17730555	Adad2	-1.03493	1086
17789270	Tex47	-1.11994	1090
17695172	Afap1	-1.08988	1093
17877640	Mageb1l1	-1.07053	1094
17741072	Ankrd35	-1.05764	1095
17815732	Stxbp6	-1.26494	1097
17824104	Serpina3b	-1.11301	1098
17618268	Ccdc90b	-1.11097	1113
17706415	Frmpd2	-1.06161	1118
17675619	Mtus2	-1.05292	1120
17812281	Pramef12	-1.08759	1121
17821260	Taf1b	-1.05097	1125
17693071	Rasgef1b	-1.07641	1127
17792808	Nat8b	-1.14144	1130
17710750	Ccdc194	-1.12696	1138
17678784	Fam222a	-1.05991	1142
17808056	Tex48	-1.09326	1146
17799330	Mir455	-1.06573	1149
17619676	Parva	-1.09712	1151
17717621	Dlat-ps1	-1.30271	1152
17647298	Rpl26	-1.06094	1153
17867772	Acer1	-1.07235	1154
17614698	Prx	-1.04719	1155
17728221	Ces1a	-1.13958	1157
17602405	Iscu	-1.23637	1159
17797244	Ndufaf6	-1.15026	1163
17666560	Lpp	-1.06717	1166
17879490	Hmgb4	-1.28853	1169
17699751	Adra1a	-1.19075	1175
17851266	Olr1295	-1.80884	1177
17649608	Anos1	-1.10059	1180
17709497	Slc10a2	-1.06718	1183
17646050	Larp1	-1.0725	1192
17794664	Vom2r50	-1.17384	1194
17830066	Spatc1	-1.20356	1195
17824344	Mir3576	-1.09455	1197
17877485	Ptges3l1	-1.06687	1198
17702341	Tcrva8	-1.05054	1203
17834018	Fgf22	-1.06136	1204
17684692	Nr5a2	-6.34621	1209
17783858	Kbtbd2	-1.03476	1212
17767091	Cst8	-1.1424	1216
17725450	Nme5	-1.09142	1219
17628646	Ccr6	-1.07332	1224
17801990	RGD1560436	-1.07423	1229
17874224	Mid2	-1.06004	1230
17778331	Defb24	-1.06069	1231
17601681	Tpi1	-1.0774	1233
17849437	Yap1	-1.04127	1235
17819240	Tex22	-1.04713	1242
17774168	Olr522	-1.02257	1244
17715954	Pou6f2	-1.06695	1247
17764784	Zfp770	-1.03937	1248
17775289	Olr760	-1.11971	1252
17679419	Kdsr	-1.03387	1254
17882613	Snai2	-1.05926	1256
17685929	RGD1309106	-1.10608	1261
17659255	Myo1d	-1.06435	1264
17749195	Lce1f	-1.10193	1267
17649499	Unc45b	-1.07558	1268
17696256	Pkd1l1	-1.06153	1274
17703315	Gjb6	-1.13077	1275
17721975	Fhod3	-1.0674	1277
17713211	Col4a1	-1.19329	1280
17851369	Olr1335	-1.15553	1283
17758286	Herc4	-1.08243	1284
17642740	Sfr1	-1.10902	1285
17718644	Id4	-1.0481	1286
17713375	Lamb2	-1.0805	1289
17868552	Tmem37	-1.04794	1293
17823188	Abcd4	-1.07735	1296
17729434	Hsd11b2	-1.07669	1299
17650228	Car10	-1.25031	1301
17725092	Garem1	-1.05061	1307
17627707	Moxd1	-1.06578	1309
17661741	Mpp3	-1.04254	1313
17882507	Ankrd33	-1.08126	1315
17771223	Qrfp	-1.06447	1316
17793691	Chl1	-1.04332	1317
17846431	Mrap2	-1.095	1319
17711144	Zfp964	-1.03511	1320
17626635	Adrb1	-1.03533	1322
17881867	H2bl1	-1.06825	1323
17754684	Fam13c	-1.56588	1326
17676101	Slc29a4	-1.09557	1327
17693348	Fam47e	-1.05111	1328
17747758	Vom2r47	-1.11713	1331
17849448	Cfap300	-1.04595	1333
17730018	Tat	-1.12517	1338
17727796	Ndrg4	-1.07111	1339
17786914	Nanog	-1.06977	1340
17689559	Txk	-1.04562	1342
17856378	Slc22a13	-1.16601	1347
17720497	Akr1c1	-1.05521	1353
17857098	Daam2	-1.07416	1358
17635729	Olr183	-1.17384	1362
17746142	Ropn1l	-1.07868	1365
17741703	Tmigd3	-1.04807	1370
17624453	Trpm6	-1.04248	1371
17870903	Med14	-1.02838	1375
17731090	Capn9	-1.10422	1377

## Sheet: Male up
Probe_ID	Gene Symbol	Male BPA(0.5+50) vs MC (fold change)	Rank M
17622279	Rplp2	1.13306	1
17669396	Hspbap1	1.08299	2
17602873	Vps28	1.23796	4
17754515	Prmt2	1.10524	5
17727794	Cnot1	1.27238	6
17605823	Thrap3	1.23799	7
17665483	Trat1	1.11928	8
17667228	Ube2l3	1.12103	9
17759143	Rpf2	1.22019	11
17678148	Rpl6	1.17162	13
17809652	Rps8	1.25198	15
17660657	Rpl23	1.27627	16
17696200	Tbrg4	1.29382	17
17808471	Haus6	1.06925	20
17739798	Cct3	1.1255	21
17835135	Tmpo	1.2236	22
17665981	Slc15a2	1.03952	23
17798022	Topors	1.15336	24
17766248	Nop56	1.21258	25
17851973	Mpzl3	1.5158	28
17727949	Psme3ip1	1.27074	29
17864386	Stat4	1.05369	30
17792222	Ptcd3	1.15654	32
17623679	Slc3a2	1.19974	34
17808428	Grm8	1.12268	36
17701790	Wdhd1	1.12139	40
17763461	Mir130a	1.61704	45
17698012	Peli2	1.10663	46
17793995	Rpl32	1.17542	47
17825181	Cdca7l	1.17542	48
17706615	Ccser2	1.111	51
17842132	Taf1d	1.12076	53
17844687	Igf2r	1.12076	54
17675730	Cyp3a23-3a1	1.13688	56
17684469	Gpr37l1	1.07775	57
17770731	Dipk1b	1.1241	58
17665753	Qtrt2	1.18207	60
17657789	Eif4a1	1.19724	66
17697861	Gpr137c	1.08155	70
17722610	Mvp	1.14722	73
17803755	Rcc2	1.22239	77
17751177	Prss12	1.23329	80
17848607	Eomes	1.12468	82
17647364	Tmem107	1.28686	85
17665319	Trmt10c	1.1542	90
17725934	Prelid2	1.11144	91
17619462	Trim66	1.08562	92
17629913	Zswim9	1.04076	93
17870751	Rgn	1.16767	95
17795674	Klra5	1.38907	97
17752800	Prrc2a	1.13237	99
17600181	Vcp	1.47302	100
17722383	Matr3	1.12271	101
17782636	Tmem178b	1.14096	102
17878832	Armcx2	1.09257	103
17604311	Paics	1.10716	108
17879977	Irak1	1.14047	110
17766359	Atrn	1.12809	111
17688794	G3bp2	1.22911	112
17769015	Slc13a3	1.13269	113
17638660	Ascl2	1.23236	114
17670116	Atp10b	1.09584	115
17859862	Eef1b2	1.56408	123
17762604	Lrp2	1.71687	124
17754240	Krtap10-7	1.10805	125
17725192	Mocos	1.15586	126
17678168	Oas1f	1.26678	128
17711913	Frg1	9.69068	130
17669608	Tmf1	1.08706	131
17700702	Hs6st3	1.54786	132
17859318	Spats2l	1.10301	133
17616068	Garin5a	1.07469	140
17673387	Cct6a	1.1126	142
17761570	Rpl12	1.14417	144
17793044	Eefsec	1.31426	149
17661796	Lsm12	1.02272	151
17812668	Tardbp	1.11283	152
17630020	Nop53	1.12453	154
17755886	Ascc3	1.26816	155
17778973	Lbp	1.19675	160
17864112	Cnot11	1.12207	161
17835470	Mettl25	1.08513	163
17746778	Zmat3	1.10027	165
17626561	Tcf7l2	1.08966	166
17866175	Ncl	1.17546	169
17712905	Cfap97d2	1.17116	171
17802806	Ppp1r8	1.30457	172
17856201	Cnot10	1.12413	177
17709164	Myom2	1.16325	178
17882621	Tnfrsf9	1.09353	180
17737044	Sirpa	1.08901	183
17644254	Traf7	1.15101	188
17649952	Inca1	1.1082	192
17649960	Pfn1	1.1082	193
17807212	Acnat1	2.56421	195
17761572	Angptl2	1.06111	196
17612350	Rgmb	1.55545	201
17731351	Bean1	1.05849	206
17670276	Ephb3	2.43702	207
17762026	Acvr2a	1.08528	208
17855074	Slco2a1	1.15497	211
17634598	Efl1	1.10774	214
17612506	Zfp52	1.12932	217
17603831	Fcf1	1.12779	219
17671538	Katnal1	1.1748	220
17736456	Prlr	1.09046	224
17706032	Sfmbt1	1.09416	229
17646114	Polr3c	1.10137	230
17670575	B3gnt5	1.03199	231
17830042	Iqank1	1.10051	233
17747682	Mme	1.30437	235
17616002	Fv1	1.13884	236
17695845	Ccdc157	1.12128	247
17787247	Chd4	1.24833	249
17606093	Derl1	1.151	250
17708013	Klkb1	1.11574	251
17724811	Esco1	1.12249	252
17775958	Pla2g4e	1.10057	254
17878822	Armcx6	1.13321	260
17666582	Sst	1.1858	265
17725346	LOC498836	1.09675	267
17678731	Oasl2	1.06495	270
17874422	Arhgap36	1.08809	274
17856974	Satb1	1.03758	276
17636301	Eif4g2	1.04059	279
17789082	Sema3e	1.15251	287
17668572	Zbtb11	1.05807	289
17776979	Fahd2a	1.04775	293
17779161	Wfdc15b	1.05466	294
17768666	Mybl2	1.13606	301
17645038	Rpl30	1.14365	307
17725726	Dnd1	1.15952	309
17706987	Rpl18a	1.14645	312
17813426	Klhl17	1.08018	316
17642210	Entpd7	1.05929	319
17840809	Fkbp11	1.10008	323
17687187	Nvl	1.08053	324
17655700	Itk	1.05544	332
17635898	Gvin1	1.08523	334
17844986	Rpl4	1.11838	336
17730478	Cmip	1.09836	338
17600875	Emg1	1.03873	343
17624899	Pdcd1lg2	1.21682	346
17723951	Gnal	1.09551	347
17632725	Aldh16a1	1.06677	348
17796700	LOC100912291	1.22812	351
17661197	Krt31	2.04267	352
17751221	Ndst4	1.1503	357
17643356	Ercc4l1	1.10589	358
17635207	Neu3	1.0557	360
17882329	Gng4	1.09094	361
17754816	Rufy2	1.08167	363
17865053	Klf7	1.03549	366
17783565	Nfe2l3	1.0941	367
17662959	Map2k6	1.04491	370
17615696	Zfp141	1.05067	373
17641178	RGD1359158	1.34071	374
17702182	Chd8	1.04509	375
17633068	Abcc8	1.12837	385
17843745	Jaml	1.87123	388
17761410	Prrc2b	1.20194	389
17794983	Ncapd2	1.08753	391
17676776	Agfg2	1.08806	393
17816064	Mia2	1.15373	396
17852458	Zc3h12c	1.08901	397
17857996	Gsta6	1.10219	398
17649604	Ccl4	1.36841	399
17880863	Nfic	1.07131	400
17875897	Efhc2	1.25994	401
17881785	Clk2	1.05031	402
17630680	Ceacam1	1.02671	406
17880732	Toporsl	1.14078	407
17752445	RT1-T18	1.14322	408
17746435	Cyp7b1	1.08565	413
17708414	Tti2	1.08125	416
17853338	Map2k5	1.06958	417
17625518	Entpd1	1.05826	418
17619464	Dennd2b	1.06164	421
17831906	Pdzrn4	1.06164	422
17653002	Sec14l1	1.142	425
17866937	Rab31	1.03157	426
17659395	Ccl6	1.05942	428
17882609	Ism2	1.17734	429
17845815	Ccpg1	1.15488	430
17615171	Zfp383	1.11585	433
17871605	Kctd12b	1.04225	436
17747897	Kpna4	1.05497	437
17662513	Tex2	1.11046	438
17866137	Sp100	1.06682	439
17828543	Lrig3	1.0809	443
17827629	Ntn4	1.21832	446
17795684	Ly49i7	1.32261	447
17762108	Lypd6	1.45268	450
17786046	Ttll3	1.09686	455
17657197	Zfp287	1.07558	456
17624245	Kdm2a	1.04628	459
17690621	Sorcs2	1.12103	461
17644404	Igfals	1.2679	462
17730363	Nudt7	1.05767	464
17752747	Tnf	1.1106	466
17874161	Rnf128	1.15868	467
17743875	Mctp1	1.23517	469
17673023	Bud23	1.24303	470
17852677	Sh2d7	1.05631	475
17635186	Rps3	1.17897	476
17749947	Cd2	1.10721	480
17698694	Cmtm5	1.13295	481
17764152	Dgkz	1.13596	483
17803003	Ifnlr1	1.43507	484
17753894	Glp1r	1.10819	486
17661171	Krtap17-1	1.17903	487
17674969	Zfp958	1.31288	494
17723832	Malt1	1.06081	497
17859655	Bmpr2	1.04393	499
17774693	Prdm11	1.09264	500
17700435	Pibf1	1.05216	505
17882677	Impact	1.08205	506
17705115	Obi1	1.24854	509
17772562	Pla2r1	1.10159	510
17795541	Ly49si2	1.07854	515
17793650	Pdzrn3	1.08222	519
17647798	Gltpd2	1.19682	521
17795515	Klra17	1.11302	524
17643104	LOC681006	1.04072	525
17823969	Itpk1	1.17982	526
17652123	Psmc5	1.13213	529
17876849	Tspyl2	1.09632	531
17671285	Fcer2	1.09436	532
17785849	Bhlhe40	1.06865	533
17758543	Fam241b	1.17981	534
17786158	Brk1	1.05671	535
17755554	Gtf3c6	1.20839	536
17755250	Dse	1.13276	537
17879295	Magea5	1.1123	539
17663090	Cd300le	1.08993	542
17715062	Adtrp	1.07263	543
17789192	Crot	1.07285	544
17830985	Tef	1.12258	548
17865955	Dock10	1.07405	550
17870009	Zfp81	1.07261	552
17857704	Runx2	1.18643	558
17706642	Dydc1	1.10839	559
17714849	Phf2	1.02962	560
17858292	Prss39	1.21188	563
17705426	Gpr18	1.05561	567
17652949	St6galnac2	1.45221	568
17881889	Rnf157	1.04562	569
17882041	Adcy9	1.10341	573
17780879	Ptpn12	1.04086	574
17795586	Ly49s6	1.1188	579
17840408	Dbx2	1.3723	581
17640313	Ubxn1	1.13398	587
17651031	Krtap9-1	1.08852	589
17772978	Stk39	1.06021	591
17614147	Zfp235	1.13723	594
17630268	Exoc3l2	1.1146	596
17763560	Aplnr	1.16447	597
17839274	Rpl3	1.08437	601
17681825	Fcgr3a	1.1667	604
17861864	Bok	1.14852	605
17719453	Cmah	1.03737	609
17840701	Olr1106	1.15074	610
17668766	Retnla	1.16442	612
17853768	Foxb1	1.05689	613
17811169	Wasf2	1.03125	614
17882025	Tlr8	1.05507	615
17600021	Jpt1	1.08627	616
17817782	Gpr65	1.03097	617
17782531	Ttc26	1.06868	618
17734841	Pcsk1	1.14605	620
17875310	Sh2d1a	1.14078	621
17817588	Ift43	1.07544	624
17790823	Dennd2a	1.17998	625
17658663	Doc2b	1.09132	626
17635940	Cyb5r2	1.16164	632
17818321	Evl	1.0845	633
17843141	Tmem218	1.0425	634
17661471	Rab5c	1.02353	635
17691637	Vstm2a	1.33995	641
17878133	Itgb1bp2	1.13485	646
17863039	Cyp39a1	1.10813	647
17633143	Sergef	1.07863	652
17781469	Asb4	1.19266	657
17699849	Loxl2	1.0689	660
17856125	Pdcd6ip	1.02897	662
17672731	Fis1	1.06842	664
17610935	L3mbtl3	1.07681	667
17748424	Rps3a	1.11721	669
17635403	Folr2	1.03415	673
17710984	Sugp2	1.06417	674
17672714	Pilrb2	1.07591	675
17713258	Tnfsf13b	1.17831	678
17848650	Itga9	1.0849	680
17754713	Cabcoco1	1.04693	683
17773349	Hoxd4	1.27495	684
17787572	Clec9a	1.08892	686
17644086	Cldn6	1.10111	688
17704935	Ralbp1	1.10194	689
17802783	Xkr8	1.29481	690
17640579	Tmem132a	1.09761	692
17794646	C3ar1	1.10958	694
17790578	Fam180a	1.10589	701
17783745	Mindy4	1.19079	702
17680754	Uchl5	1.10118	705
17791076	Olr804	1.09515	706
17639197	Ankrd13d	1.10673	707
17809625	Plk3	1.1445	708
17649537	Slfn4	1.05817	709
17723195	Ftmt	1.123	711
17795160	Tead4	1.10892	712
17796679	Ube2w	1.37849	713
17804598	Rpl22	1.04464	714
17624393	Prune2	1.0735	718
17839278	Rps19bp1	1.03794	719
17634604	Il16	1.06431	726
17827164	Cry1	1.06032	728
17656451	Lypd9	1.10242	730
17787622	Prr21	1.13662	731
17696324	Ikzf1	1.14196	732
17625123	Ifit1	1.07304	733
17700524	Cln5	1.09974	735
17722380	Mir1949	1.10698	736
17602719	Tomm22	1.08034	743
17629677	Lilrb4	1.06391	747
17668900	Cd200r1l	1.13986	748
17735497	Cd180	1.07605	749
17880160	Slfn1	1.04229	750
17763548	Tnks1bp1	1.10008	751
17635675	Trim5	1.03918	752
17712654	Defb12	1.08448	755
17836123	Irak3	1.0729	756
17659799	Ppm1e	1.10477	767
17668556	Senp7	1.1211	768
17621918	Prap1	1.13925	772
17746481	Crh	1.07273	773
17794657	Clec4e	1.08361	774
17851627	Pou2f3	1.15818	778
17604697	Mrpl11	1.15012	780
17847381	Dock3	2.5668	781
17658370	Slc13a5	1.16058	782
17882475	Ccdc30	1.08302	785
17764753	Fmn1	1.12685	786
17771174	Ptges	1.13172	787
17661049	Krtap1-5	1.09754	788
17861243	Snorc	1.12112	792
17684772	RGD1566099	1.18873	796
17790063	Wasl	1.05786	800
17801997	Rspo1	1.04953	804
17869130	Ak5	1.08364	805
17661091	Krtap4-3	1.06211	806
17843274	Olr1229	1.10676	807
17743645	Negr1	1.0983	810
17702184	Rab2b	1.0623	813
17820661	Trim54	1.11237	814
17883195	Mt rRNA	1.03614	816
17786908	Dppa3	1.06217	821
17602901	Dmac1	1.16846	822
17725088	Trappc8	1.08865	823
17810614	Ago4	1.06169	824
17652978	Mgat5b	1.12107	827
17766558	Plcb1	1.11621	828
17738823	Arhgef26	1.36196	829
17797581	Fbxl4	1.03255	833
17638511	Dusp8	1.09391	835
17772405	Cytip	1.08013	836
17621377	Plekha1	1.0706	841
17630609	Pou2f2	1.10553	845
17648841	Foxn1	1.18615	846
17781204	Steap2	1.07542	852
17722336	Slbp	1.06681	853
17843465	Hspa8	1.08349	856
17717308	Plxdc2	1.02838	857
17726656	Spink13	1.22501	859
17779424	Trp53rkb	1.04723	860
17779695	Zfp217	1.09964	861
17877674	Dcaf8l1	1.07872	863
17704710	Dgkh	1.07018	866
17665624	Cd200	1.03735	867
17874683	Vgll1	1.09272	869
17809258	Zfyve9	1.07149	871
17732027	Cyld	1.13331	873
17602907	Ube2e1	1.26167	874
17616319	Lhb	1.15138	875
17779805	Mir296	1.15103	876
17869056	Sowahc	1.08819	877
17694639	Arap2	7.5091	878
17781957	Thrsp	1.08327	880
17831049	Mei1	1.14111	881
17862587	Treml4	1.07181	889
17666271	Fbxo45	1.0724	891
17672411	Nxpe5	1.0713	892
17806671	Fam205a	1.25063	893
17819983	Prepl	1.05003	894
17636814	Igsf6	1.05882	895
17862007	Fbxl17	1.10665	898
17660362	Ngfr	1.04879	899
17865793	Pax3	1.05711	901
17661785	Pyy	1.12423	902
17874579	RGD1564845	1.0741	906
17731798	Large1	1.11198	912
17836473	Kif5a	1.10929	913
17879352	Mir450a1	8.41453	914
17634766	Olr16	1.12147	915
17780379	Actr3b	1.11692	916
17770406	Tmem141	1.05416	917
17834858	Dram1	1.07384	918
17759530	Ebf3	1.15663	925
17851673	Pdzd3	1.03697	926
17697961	Fbxo34	1.09459	927
17881093	Eid2b	1.05793	928
17715330	Slc22a23	1.07659	929
17875155	Avpr2	1.15265	933
17795659	Ly49s7	1.29324	935
17860505	Cyp27a1	1.12974	940
17730371	Vat1l	1.34648	944
17709647	Cacna2d3	1.15561	945
17844970	Fnbp1	1.13496	953
17846210	Myo6	1.06473	954
17624216	Patl1	1.23124	957
17676796	Pilra	1.06875	961
17785934	Thumpd3	1.18447	964
17692517	Ccdc18	1.03916	966
17825498	Atp5f1b	1.11409	970
17628420	Tagap	1.06125	972
17760196	Lcn4	1.06715	974
17715033	Ranbp9	1.09851	975
17751564	Bank1	1.0465	977
17839104	Sox10	1.1215	978
17749159	Lelp1	1.14694	979
17620391	Prkcb	1.05194	985
17658137	Chrne	1.09108	986
17651323	Psme3	1.09954	987
17861310	Atg16l1	1.09551	988
17875719	Usp11	1.05693	990
17834736	Eid3	1.09659	991
17789488	Samd9l	1.04433	992
17715845	Zkscan8	1.06373	993
17720404	Idi2	1.09936	996
17676012	Usp42	1.09804	999
17806222	Manea	1.01783	1002
17626410	Ins1	1.08966	1010
17612399	Fpr3	1.22331	1012
17629126	Vom1r63	1.11279	1013
17777693	Tasp1	1.0617	1014
17761956	Rpl10	1.0995	1015
17665660	Boc	1.10712	1017
17733318	Tango6	1.15353	1020
17610691	Map3k5	1.06119	1021
17835724	Glipr1	1.04469	1026
17791585	Lsm5	1.04723	1027
17755547	Rev3l	1.07091	1029
17842144	Cartpt	1.03722	1033
17846438	Gabarapl3	1.3075	1034
17664863	Sim2	1.13198	1037
17864547	Ccdc150	1.01834	1039
17871267	Mir362	1.1219	1040
17651653	Fmnl1	1.04836	1041
17876453	Crip2	1.13568	1043
17689697	Gnpda2	1.15925	1046
17837576	Trib1	1.28934	1047
17756346	Ltb	1.09099	1049
17757449	Cbs	1.13644	1050
17844664	Hcn4	1.16918	1052
17668368	Riox2	1.07933	1053
17726157	Ticam2	1.08941	1059
17675682	Gsx1	1.24702	1061
17758929	Ccdc138	1.1259	1063
17834474	RGD1565071	1.12903	1065
17825553	Mip	1.15631	1066
17864163	Mrps9	1.08226	1067
17747418	Ccna1	1.0379	1068
17751632	RGD1309170	1.15954	1069
17818007	Tmem251	1.04509	1071
17774274	Olr652	1.41369	1076
17752139	Tyw3	1.09603	1079
17750608	Elapor1	1.11854	1081
17834307	Cyp4f6	1.11662	1082
17676907	Upk3bl	1.06756	1093
17847555	Camkv	1.04596	1095
17710715	Abhd8	1.10623	1097
17870865	Cask	1.0788	1099
17689943	Tlr10	1.17003	1101
17653953	Hmox2	1.03135	1104
17690272	Lcorl	1.03824	1105
17863770	Neurl3	1.0934	1112
17779331	Ncoa5	1.04388	1115
17855551	Sema3b	1.09536	1116
17610505	Epm2a	1.09239	1121
17774291	Olr663	1.05626	1122
17775329	Olr791	1.1256	1124
17882291	Flvcr1	1.0494	1125
17734990	Pou5f2	1.07595	1127
17676754	Irs3	1.06121	1128
17880477	Gabarapl2	1.04507	1129
17772320	Stam2	1.03949	1130
17644950	Lcp2	1.02571	1132
17750657	Stxbp3	1.04007	1133
17698315	Trav14s2	1.07971	1142
17683259	Hhat	1.19618	1143
17790749	Klrg2	1.10497	1144
17612808	Vstm1	1.01744	1146
17795734	Ybx3	1.0718	1148
17839752	Ttc38	2.54377	1149
17873463	Atp7a	1.0525	1153
17601663	Spsb2	1.17481	1155
17692413	Fgfrl1	1.06341	1158
17744200	Zfyve16	1.06459	1159
17735293	Zbed3	1.17383	1160
17686504	Atf6	1.04224	1161
17832982	Pa2g4	1.02547	1163
17700678	Cldn10	1.07398	1164
17737182	Slc10a5	1.12335	1168
17676296	Elfn1	1.06472	1170
17629660	Fcar	1.08455	1171
17691515	LOC688553	1.06861	1172
17688437	Lin54	1.05611	1174
17772305	Cacnb4	1.16569	1177
17749842	Tbx15	1.19994	1185
17660784	Mien1	1.0367	1191
17851954	Cd3g	1.05768	1192
17733194	Ctrl	1.12541	1199
17873537	P2ry10b	1.06087	1201
17821531	Pik3cg	1.04388	1203
17671916	Olr1572	1.06796	1205
17789982	Cadps2	1.13775	1207
17866724	Pdcd1	1.15378	1209
17882331	Zfp397	1.05016	1210
17768901	Snx21	1.07588	1213
17628511	Map3k4	1.07475	1214
17623683	LOC100912041	1.03554	1216
17840244	Abcd2	1.10475	1219
17729142	Tmem184c	1.23886	1220
17718463	Spata31e1	1.43531	1222
17774266	Olr631	1.0407	1224
17755135	Gopc	1.23222	1227
17750150	Tafa3	1.05887	1230
17744073	Vcan	1.04585	1237
17653639	Snn	1.12102	1238
17794149	Csgalnact2	1.10819	1239
17837767	Tmem71	1.03991	1241
17756337	Ddx39b	1.09483	1242
17882639	Tlr9	1.11061	1251
17669332	Stfa2l1	1.16258	1253
17882239	Card14	1.09856	1256
17828130	Osbpl8	1.06518	1260
17879490	Cd19	1.45716	1274
17692790	Zfp788p	1.624	1279
17650607	Osbpl7	1.05127	1280
17881921	Cdsn	1.21116	1281
17841858	Mmp12	1.11158	1283
17696164	Myo1g	1.07439	1287
17665106	Olr1528	1.07626	1289
17741868	Amigo1	1.07146	1290
17839047	Mfng	1.07329	1292
17827963	Rassf9	1.10431	1294
17688307	Wdfy3	1.07509	1295
17681477	Sele	1.0737	1297
17840277	Gxylt1	1.0399	1299
17723299	Csnk1g3	1.0579	1308
17832893	Slc39a5	1.08544	1311
17800587	Hspb11	1.04567	1314
17882499	Adssl1	1.0555	1315
17710221	Wdfy4	1.05395	1316
17689334	Aasdh	1.05608	1317
17804954	Cdk11b	1.05592	1318
17794572	Klrg1	1.05062	1325
17743103	Tspan5	1.05401	1326
17745289	Gpx8	1.07192	1327
17881879	Cgas	1.12477	1328
17727296	Nfatc1	1.04116	1329
17744731	Bdp1	1.03788	1331
17690143	Sel1l3	1.16454	1336
17787809	LOC500354	1.09065	1337
17816217	Tigar-ps1	1.35759	1339
17813875	Cript	1.03563	1340
17615745	Siglec5	1.06272	1343
17816850	Churc1	1.07496	1345
17764101	Ckap5	1.11372	1346
17644901	Stk10	1.05969	1348
17633870	Synm	1.10744	1349
17668004	Rcan1	1.10088	1352
17731912	Capns2	1.09863	1353
17650515	Hoxb9	1.13195	1354

## Sheet: Male down
Probe_ID	Gene Symbol	Male BPA(0.5+50) vs MC (fold change)	Rank M
17858567	Lyg2	-1.34799	18
17813508	Fez2	-1.56339	26
17723509	Epm2a	-1.23324	31
17635588	Olr121	-1.23096	35
17711787	Pdlim3	-1.14161	39
17633915	Nr2f2	-1.27431	52
17823578	Sel1l	-1.82434	55
17842247	Olr1162	-1.16828	71
17789901	Cttnbp2	-1.09797	75
17865827	Scg2	-1.12581	76
17768777	Svs4	-1.10351	84
17712348	Ddhd2	-1.38608	88
17818435	Mir370	-12.208	89
17874991	Pwwp4	-1.10356	104
17704845	Pcdh9	-1.54737	109
17774816	Ttc17	-1.0711	136
17725233	Pik3c3	-1.30472	150
17711983	Adam20	-1.26988	153
17801679	Guca2a	-1.04685	157
17872580	Pnpla4	-1.14997	170
17758831	Cd46	-1.68374	173
17833196	Olr936	-1.63188	175
17810045	Olr857	-1.11558	176
17783444	Aoc1	-1.14085	181
17664442	N6amt1	-1.2219	182
17741466	Ampd1	-1.12879	184
17788736	Srpk2	-1.22408	185
17866861	Nudt12	-4.62301	186
17822060	Brms1l	-1.91957	191
17880833	Mknk2	-1.21197	197
17749142	Pglyrp3b	-1.11629	198
17654033	Olr1356	-1.07982	199
17755592	Ak9	-1.24127	209
17868867	Ces1d	-1.13004	213
17680226	Fmod	-1.20866	226
17629992	Crx	-1.13562	227
17805450	Vxn	-1.27563	228
17653468	Pla2g10	-1.19466	232
17879625	Slitrk2	-1.26037	239
17683397	Cntnap5b	-1.47924	240
17626408	Sorcs1	-1.16949	242
17667435	Robo1	-1.51199	243
17854660	Zic4	-1.18118	245
17874722	F9	-1.16857	255
17795006	Tuba3b	-1.21386	256
17883207	Mt-nd1	-1.15676	257
17611240	Echdc1	-1.1325	259
17880959	Smim7	-1.11864	261
17726740	St8sia3	-1.16472	264
17744446	Sv2c	-1.63678	266
17753995	Pde9a	-1.15625	275
17881549	Sall3	-1.21328	285
17747131	RGD1563562	-1.11528	292
17751329	Egf	-1.10822	295
17649863	Tbx4	-1.14907	296
17774397	Olr744	-1.24915	297
17843241	Olr1206	-1.31354	298
17863238	Tfap2d	-1.15282	299
17625943	Sema4g	-1.16562	311
17746564	Tbl1xr1	-1.25059	313
17798630	Foxe1	-1.21169	315
17870837	Maob	-1.30287	321
17785391	Vom1r97	-1.13655	326
17787922	Plekha5	-1.15568	327
17719375	RGD1307443	-1.05841	330
17628980	Mir3596c	-1.40248	333
17878660	Dach2	-1.31421	337
17747119	Pcdh10	-1.16582	339
17711987	Adam24	-1.14589	342
17757392	Dnah8	-1.07603	344
17743062	Adh5	-1.13991	345
17723051	Lvrn	-1.13451	350
17729870	Wwp2	-1.13019	353
17813583	Hnrnpll	-1.20414	359
17664326	Lipi	-1.32391	362
17830322	Commd5	-1.20012	368
17808299	Mpdz	-1.39617	371
17739279	Tmem144	-1.34187	377
17679443	Serpinb13	-1.14306	392
17774045	Slc43a3	-1.15675	394
17774182	Olr533	-1.13813	395
17760321	Lcn4	-1.27125	403
17770733	Lcn1	-1.09691	412
17670915	LOC102546862	-1.10914	419
17790019	Slc13a1	-1.17892	431
17878506	Wasf1	-1.16455	434
17707766	Tenm3	-1.12962	441
17842225	Olr1147	-1.2174	445
17613818	Ceacam11	-1.35405	448
17817740	Dio2	-1.40025	457
17737222	Pmp2	-1.18118	472
17797315	Cdh17	-1.14939	473
17682154	Cfap45	-1.09501	477
17865545	Mir375	-1.12824	478
17880744	Rnf223	-1.15468	479
17673401	Zfp11	-1.08922	490
17796833	Slco5a1	-1.26699	495
17818647	Mir379	-1.37769	496
17720059	Wac	-1.17956	498
17876479	Luzp4	-1.19757	501
17746398	Pex2	-1.13828	504
17611384	Slc6a18	-1.11065	512
17876865	LOC685699	-1.14526	513
17664511	Krtap16-5	-1.34839	514
17612471	Vom1r21	-1.1105	517
17798803	Cavin4	-1.08206	522
17688108	Barhl2	-1.15088	527
17819449	Ptprn2	-1.11252	528
17797288	Gem	-1.13638	540
17665258	Lnp1	-1.1127	549
17621989	Olr302	-1.23474	553
17740626	C2cd4d	-1.10547	556
17730306	Terf2ip	-1.24868	564
17694443	Pds5a	-1.25752	565
17838174	Cyp11b1	-1.10583	566
17785915	Cav3	-1.1889	570
17738640	Nbea	-1.55357	575
17700872	Tmtc4	-2.58266	576
17769299	Spo11	-1.21957	582
17832113	Wnt1	-1.06481	592
17674285	Tbx3	-1.1259	599
17617261	Mir211	-1.22015	602
17765785	Slc27a2	-1.08015	603
17676538	Mir25	-1.14481	607
17810057	Olr866	-1.1814	608
17690395	Rps11-ps1	-1.11061	629
17694311	Grxcr1	-1.19467	630
17837275	Ext1	-1.16718	636
17844192	Slc35f2	-1.27011	642
17724615	Fbxo15	-1.10116	644
17872929	Pgr15l	-1.67181	651
17882497	Noxred1	-1.06655	655
17866307	Dnajb3	-1.08419	656
17713941	Ctsr	-1.20412	659
17723017	Ndufb3	-1.37091	663
17718640	Mirlet7f-1	-1.17266	665
17781466	Ppp1r9a	-1.08793	666
17818250	Vrk1	-1.52435	671
17751284	Ank2	-1.66201	677
17880903	Rasgrf1	-1.11487	682
17720295	Ryr2	-2.42471	696
17777537	Cds2	-1.27937	699
17716950	Usp6nl	-1.1074	704
17671298	Pcp2	-1.21147	710
17725423	Set	-1.29742	717
17852119	Cadm1	-1.06434	722
17641707	Htr7	-1.50522	723
17749641	Nudt17	-1.09558	724
17860307	Tnp1	-1.14021	725
17755805	Popdc3	-2.01912	727
17878331	Mir384	-1.33355	740
17862543	Mocs1	-1.37277	744
17624812	Slc1a1	-1.13508	745
17737452	Naaladl2	-1.16089	746
17774270	Olr650	-1.14916	754
17676608	Vom2r61	-1.19516	765
17711322	Spock3	-1.24625	769
17665832	Tmem39a	-1.19871	775
17706458	Rbp3	-1.23637	776
17822984	Slc10a1	-1.08175	777
17635637	Olr129	-1.23356	784
17841243	Scn8a	-1.13442	789
17664918	Kcnj6	-1.14888	791
17739044	Mlf1	-1.02867	793
17676941	Dtx2	-1.36642	798
17842288	Or7h7b	-1.17855	799
17872707	Gk	-1.15813	808
17619140	Olr143	-1.3854	812
17831908	Yaf2	-1.27541	818
17866738	Fam174a	-1.29354	830
17837103	Eif3el1	-1.32813	838
17633641	Slc25a19	-1.49841	847
17846131	Gsta5	-1.17956	851
17641494	Tpd52l3	-1.11983	854
17756731	Btnl3	-1.17424	858
17699518	Defb43	-1.18457	862
17843069	LOC688335	-1.22937	870
17774219	Olr575	-1.17382	872
17722664	Pcdhb11	-1.19603	879
17730701	Mir3564	-1.13911	885
17717823	Mir24-1	-1.1297	896
17825898	Olr995	-1.09913	897
17856301	Rbms3	-1.10443	909
17821649	Dgkb	-1.10664	911
17768369	Ralgapb	-1.11122	921
17861121	Alpg	-1.09171	930
17814060	Srd5a2	-1.54603	934
17658479	Olr1474	-1.22917	937
17707510	Cpe	-1.20247	942
17838768	Foxh1	-1.09177	943
17823470	Gle1-ps1	-1.07773	951
17688569	Gk2	-1.2839	955
17883033	Ackr3	-1.16738	958
17783891	Vom1r72	-1.18372	960
17613521	Cabp5	-1.14472	962
17742537	Arsj	-1.08615	963
17796847	RGD1564053	-1.13521	967
17818295	Cyp46a1	-1.05375	968
17814793	Cyria	-1.1831	969
17709048	Defb12	-1.20127	973
17806664	Ccl21	-1.0578	976
17779178	Slpil2	-1.11623	980
17713758	Prxl2c	-1.50914	983
17767178	Zfp120-like	-1.07153	989
17779556	Kcnb1	-1.07212	1005
17754602	Rsph14	-1.15752	1016
17843250	Olr1214	-1.13868	1018
17826858	Zfp81	-1.15901	1022
17830364	Txn2	-1.19924	1024
17875055	Dusp9	-1.05598	1028
17612863	Zfp418	-1.08597	1045
17692643	Ephx4	-1.30439	1051
17763691	Olr595	-1.21669	1054
17881154	Sgf29	-1.11047	1058
17850788	Tmem45b	-1.1268	1064
17787479	Tead4	-1.3147	1070
17702226	Olr1645	-1.14066	1072
17879629	Mir3551	-1.34313	1077
17757895	Gstt3	-1.06793	1080
17775285	Olr747	-1.18475	1083
17879293	Magea5	-1.41082	1086
17819544	Tmem196	-1.17866	1087
17787545	Klrb1	-1.16069	1091
17880501	Spop	-1.16149	1092
17722302	Fam13b	-1.81351	1094
17731839	Sez6l	-1.13202	1098
17814005	Nrxn1	-1.18682	1100
17844705	Celf6	-1.18036	1102
17771322	Ttc16	-1.08339	1106
17759327	Foxo3	-2.02173	1107
17789165	Mir879	-1.4924	1113
17818649	Mir411	-1.26573	1114
17677021	Trim50	-1.07752	1117
17691728	Spred2	-1.093	1119
17876893	Samt1	-1.32034	1120
17662073	Spata32	-1.21369	1123
17719761	Sugct	-1.1481	1126
17778304	Nrsn2	-1.23298	1138
17844933	Pias1	-1.16574	1140
17642329	Scd1	-1.07567	1147
17807247	Grin3a	-1.10541	1152
17818137	Serpina3n	-1.11945	1157
17764304	Slc1a2	-1.07	1162
17633011	Syngr4	-1.04371	1167
17795787	Tas2r129	-1.1054	1173
17742419	Bcar3	-1.08563	1178
17635717	Olr174	-1.16569	1180
17612661	Vom2r-ps39	-1.34208	1183
17660257	Tmem92	-1.07554	1184
17681000	Shcbp1l	-1.16071	1187
17726649	Spink13	-1.27518	1193
17790970	Try10	-1.05487	1195
17658637	Serpinf2	-1.11562	1204
17742987	LOC102555814	-1.10276	1206
17628459	Mas1	-1.04307	1225
17741928	Sars1	-1.13796	1228
17612797	Oscar	-1.07798	1229
17880310	Csn1s1	-1.12353	1233
17867322	Mt tRNA	-1.06538	1234
17715886	Gpx5	-1.17921	1235
17619110	Olr110	-1.13624	1240
17882659	Pdx1	-1.1147	1245
17766983	Ralgapa2	-1.20284	1246
17848329	Lrrc2	-1.13867	1247
17822614	Six1	-1.17717	1254
17812273	Pramef20	-1.23252	1257
17706552	Ldb3	-1.36387	1258
17657485	Rpl37a-like	-1.07937	1262
17734970	RGD1560883	-1.71075	1264
17823389	Ift43	-1.11793	1266
17668365	Epha6	-1.18491	1267
17837872	Col22a1	-1.0731	1275
17792224	Polr1a	-1.06088	1277
17621587	Cpxm2	-1.15795	1278
17664878	Hlcs	-1.10184	1282
17795882	Gsg1	-1.09619	1304
17839733	Ribc2	-1.29456	1305
17820928	Efr3b	-1.17883	1310
17664495	Cldn17	-1.16833	1322
17770011	Il36g	-1.07999	1324
17629006	Vom1r10	-1.11649	1333
17808901	Oog3-ps1	-1.14684	1334
17828428	Llph	-1.80808	1341
17635920	Olr218	-1.10504	1342
17854449	Snap91	-1.05897	1350
