# Supplementary material for: Extensive transcriptome sex-reversal later in life, after developmental low-dose bisphenol A exposure
Source: Research Square preprint supplement (doi:10.21203/rs.3.rs-2977026/v1), 2023-07-06
Supplement: Supplementary file 2 [file 940e12b692bf453418654207.xlsx]

## Sheet: Sheet1
chemical_name	p-value Male	beta1 Male	beta1 Female	p-value Female
1-(1-enyl-palmitoyl)-2-oleoyl-GPC (P-16:0/18:1)*	0	-0.8727	-1.0398	0
1-(1-enyl-palmitoyl)-2-linoleoyl-GPC (P-16:0/18:2)*	0	-0.8173	-0.9558	0
glutamate	0	0.739	0.8545	0
oleoyl-arachidonoyl-glycerol (18:1/20:4) [1]*	0	0.7464	0.6862	0
glucose	0	0.8248	0.7131	0
oleoyl-linoleoyl-glycerol (18:1/18:2) [2]	0	0.9451	0.728	0
N-stearoyl-sphinganine (d18:0/18:0)*	8e-25	0.64	0.8404	0
4-hydroxyglutamate	7.7e-23	0.6068	0.7304	0
metabolonic lactone sulfate	1.26e-21	0.5984	0.8589	0
1-lignoceroyl-GPC (24:0)	8.64e-13	-0.4946	-0.7069	0
cortolone glucuronide (1)	0	0.6797	0.7341	1e-25
oleoyl-linoleoyl-glycerol (18:1/18:2) [1]	0	0.883	0.7007	1e-25
diacylglycerol (16:1/18:2 [2], 16:0/18:3 [1])*	0	0.7687	0.6225	3e-25
urate	1.67e-09	0.3463	0.6293	4e-25
1-(1-enyl-palmitoyl)-2-palmitoyl-GPC (P-16:0/16:0)*	0	-0.7433	-0.7094	5e-25
1-(1-enyl-palmitoyl)-2-palmitoleoyl-GPC (P-16:0/16:1)*	4e-25	-0.6315	-0.6771	5e-25
gamma-glutamylisoleucine*	1.89e-18	0.4922	0.6625	2e-24
1-linoleoyl-GPC (18:2)	1.6e-24	-0.6755	-0.6688	2.7e-24
N-stearoyl-sphingosine (d18:1/18:0)*	6.2e-24	0.6562	0.6636	1.31e-23
oleoyl-arachidonoyl-glycerol (18:1/20:4) [2]*	0	0.845	0.6296	5.26e-23
1-palmitoyl-2-oleoyl-GPE (16:0/18:1)	0	0.8361	0.668	6.45e-23
1-carboxyethylisoleucine	7.12e-23	0.6042	0.6142	1.67e-22
1-stearoyl-2-oleoyl-GPE (18:0/18:1)	0	0.8756	0.6511	1.89e-22
2-O-methylascorbic acid	3.04e-15	0.5049	0.6265	1.3e-21
1-palmitoleoylglycerol (16:1)*	0	0.7066	0.5802	7.73e-21
gamma-glutamylvaline	1.45e-12	0.4088	0.6255	8.15e-21
1-oleoylglycerol (18:1)	0	0.7874	0.6156	1.03e-20
sphingosine	3.09e-11	0.4272	0.6515	1.46e-20
lactosyl-N-nervonoyl-sphingosine (d18:1/24:1)*	1.6e-24	-0.6907	-0.6263	2.52e-20
carotene diol (2)	1.86e-12	-0.4537	-0.6265	1.23e-19
1-carboxyethylleucine	3.21e-22	0.5967	0.5983	1.37e-19
sphingomyelin (d18:0/18:0, d19:0/17:0)*	2.5e-12	0.4709	0.6009	1.56e-19
gamma-glutamylglutamate	1.3e-15	0.5313	0.5946	2.64e-19
aspartate	6.12e-16	0.513	0.6415	4.1e-19
isoleucine	3.1e-16	0.4603	0.5494	8.61e-19
1-stearoyl-2-arachidonoyl-GPE (18:0/20:4)	0	0.8865	0.5611	1.73e-18
N-acetylglycine	2.39e-16	-0.5059	-0.609	5.96e-18
quinolinate	2.18e-10	0.3853	0.6024	6.38e-18
1-palmitoyl-2-arachidonoyl-GPI (16:0/20:4)*	6.51e-16	0.5389	0.5861	7.37e-18
2,3-dihydroxy-5-methylthio-4-pentenoate (DMTPA)*	2.66e-11	0.3863	0.5631	7.86e-18
campesterol	1.58e-09	-0.378	-0.5688	3.32e-17
1-carboxyethylphenylalanine	6.75e-22	0.5922	0.5724	4.42e-17
pyruvate	8.12e-15	0.5388	0.5644	4.56e-17
1-(1-enyl-palmitoyl)-GPC (P-16:0)*	7.1e-24	-0.6707	-0.5816	7.99e-17
1-palmitoyl-2-dihomo-linolenoyl-GPC (16:0/20:3n3 or 6)*	1.74e-16	0.5381	0.5932	8.26e-17
1-(1-enyl-stearoyl)-GPE (P-18:0)*	3.87e-15	-0.5166	-0.5968	8.56e-17
1-oleoyl-2-docosahexaenoyl-GPC (18:1/22:6)*	1.18e-09	-0.3881	-0.5678	1.04e-16
1-stearoyl-2-docosahexaenoyl-GPE (18:0/22:6)*	0	0.8674	0.5402	1.13e-16
behenoyl dihydrosphingomyelin (d18:0/22:0)*	6.89e-13	0.4918	0.5536	2.25e-16
valine	3.21e-13	0.4392	0.5426	2.68e-16
1-carboxyethylvaline	9.96e-16	0.5183	0.5614	3.02e-16
gamma-glutamylleucine	8.15e-13	0.4089	0.5039	3.24e-16
mannose	2.46e-16	0.54	0.5304	1.33e-15
tetrahydrocortisol glucuronide	6.55e-10	0.3786	0.542	1.42e-15
alanine	6.01e-16	0.5277	0.5627	1.8e-15
hydroxyasparagine**	3.7e-09	0.3299	0.5044	1.9e-15
sphingomyelin (d18:0/20:0, d16:0/22:0)*	4.33e-10	0.4222	0.5383	2.87e-15
1-stearoyl-2-linoleoyl-GPE (18:0/18:2)*	0	0.7775	0.5358	3.34e-15
tetrahydrocortisone glucuronide (5)	1.64e-18	0.5496	0.5251	3.4e-15
4-cholesten-3-one	2.72e-13	0.4829	0.5418	3.58e-15
branched-chain, straight-chain, or cyclopropyl 10:1 fatty acid (1)*	6.08e-07	-0.3252	-0.5354	4.14e-15
1-carboxyethyltyrosine	4.62e-21	0.5523	0.4391	4.25e-15
sphinganine	3.91e-10	0.3988	0.5339	6.8e-15
beta-sitosterol	5.82e-06	-0.2474	-0.4956	9.35e-15
1-oleoyl-GPC (18:1)	4.01e-16	-0.5484	-0.5247	2.11e-14
carotene diol (1)	1.61e-07	-0.3435	-0.5269	2.13e-14
lactosyl-N-behenoyl-sphingosine (d18:1/22:0)*	1.04e-09	-0.3613	-0.5372	3.67e-14
beta-cryptoxanthin	1.96e-09	-0.3811	-0.5298	4.51e-14
5-(galactosylhydroxy)-L-lysine	3.41e-06	0.2953	0.5196	5.04e-14
3beta,7beta-dihydroxy-5-cholestenoate	8.62e-06	0.2632	0.5555	5.2e-14
palmitoyl sphingomyelin (d18:1/16:0)	7e-25	-0.6677	-0.5098	5.56e-14
fructosyllysine	1.87e-13	0.4802	0.541	5.77e-14
1,2-dilinoleoyl-GPC (18:2/18:2)	5.95e-12	-0.4496	-0.5122	1.26e-13
hydroxy-CMPF*	9.95e-10	-0.4071	-0.5083	3.14e-13
N-palmitoyl-sphinganine (d18:0/16:0)	8.94e-16	0.5355	0.5057	4.02e-13
leucine	4.83e-15	0.4335	0.4338	8.22e-13
proline	2.59e-06	0.2755	0.5038	8.51e-13
1-palmitoyl-2-palmitoleoyl-GPC (16:0/16:1)*	3.51e-17	0.5597	0.4699	1.55e-12
alpha-ketoglutarate	1.41e-16	0.5811	0.4615	2.52e-12
glycosyl ceramide (d18:2/24:1, d18:1/24:2)*	2e-25	-0.6828	-0.4637	2.8e-12
1-palmitoyl-GPG (16:0)*	8e-09	0.359	0.5004	2.9e-12
5-methylthioadenosine (MTA)	7.1e-09	0.3784	0.4919	3.22e-12
ribitol	4.81e-07	0.3282	0.4861	3.38e-12
erucate (22:1n9)	4.85e-10	-0.4183	-0.4806	3.54e-12
propionylcarnitine (C3)	1.16e-11	0.4381	0.479	4.19e-12
1-stearoyl-GPG (18:0)	1.53e-09	0.3921	0.4749	7.71e-12
1-(1-enyl-stearoyl)-2-linoleoyl-GPE (P-18:0/18:2)*	2.1e-07	-0.3471	-0.481	1.03e-11
citronellic acid	5e-07	-0.3371	-0.45	1.45e-11
formiminoglutamate	1.58e-22	0.5893	0.4396	1.67e-11
sphingomyelin (d18:2/24:1, d18:1/24:2)*	6.81e-23	-0.5857	-0.4309	2.28e-11
beta-citrylglutamate	3.88e-10	0.4249	0.4511	2.45e-11
2-oleoylglycerol (18:1)	3.1e-21	0.5656	0.3815	4.04e-11
1-cerotoyl-GPC (26:0)*	1.97e-08	-0.306	-0.4319	4.21e-11
hydroxypalmitoyl sphingomyelin (d18:1/16:0(OH))**	8.01e-22	-0.6146	-0.4422	5.64e-11
1-(1-enyl-oleoyl)-GPE (P-18:1)*	1.9e-10	-0.4294	-0.4519	8.01e-11
palmitoyl-sphingosine-phosphoethanolamine (d18:1/16:0)	2.76e-23	-0.6487	-0.4378	1.01e-10
erythronate*	4.28e-05	0.2643	0.4164	1.09e-10
1-linolenoylglycerol (18:3)	2.62e-16	0.5127	0.406	1.26e-10
xanthine	7.29e-05	0.2723	0.435	1.39e-10
1-palmitoyl-2-arachidonoyl-GPE (16:0/20:4)*	3.28e-21	0.66	0.4271	1.48e-10
N-acetylglucosamine/N-acetylgalactosamine	3.82e-10	0.3934	0.4336	2.38e-10
kynurenine	1.8e-06	0.2871	0.4533	2.71e-10
glycosyl-N-behenoyl-sphingadienine (d18:2/22:0)*	9.87e-18	-0.5819	-0.4249	2.82e-10
11beta-hydroxyandrosterone glucuronide	9.27e-08	0.3559	0.4057	3.1e-10
1-palmitoyl-2-oleoyl-GPI (16:0/18:1)*	2.93e-05	0.2805	0.4286	4.18e-10
lactate	3.01e-08	0.3682	0.4321	4.19e-10
asparagine	0.0001331	-0.2427	-0.452	5.73e-10
succinylcarnitine (C4-DC)	2.67e-08	0.3522	0.4174	5.98e-10
9,10-DiHOME	3.67e-08	-0.3564	-0.4123	6.54e-10
serine	0.0001384	-0.2315	-0.4549	6.84e-10
sphingomyelin (d18:2/23:0, d18:1/23:1, d17:1/24:1)*	1.44e-12	-0.4151	-0.384	8.38e-10
deoxycholic acid 12-sulfate*	2.85e-12	0.4551	0.4045	8.39e-10
orotidine	0.0006559	0.2145	0.4056	1.14e-09
2R,3R-dihydroxybutyrate	2.56e-10	0.3926	0.449	1.38e-09
tigloylglycine	2.89e-05	-0.2166	-0.4046	1.56e-09
N2,N2-dimethylguanosine	1.55e-06	0.3002	0.4065	1.85e-09
cholesterol sulfate	0.004736	-0.1878	-0.3709	2.22e-09
indolepropionate	0.0176441	-0.1558	-0.4359	2.22e-09
3-methyladipate	4.22e-06	-0.2984	-0.3953	2.79e-09
pimeloylcarnitine/3-methyladipoylcarnitine (C7-DC)	1.37e-15	-0.5214	-0.4051	2.83e-09
arachidate (20:0)	5.4e-06	-0.3034	-0.4283	2.84e-09
2'-O-methylcytidine	3.29e-12	-0.4637	-0.4113	4.39e-09
gamma-tocopherol/beta-tocopherol	2.73e-11	0.4515	0.4085	4.82e-09
N4-acetylcytidine	3.41e-09	0.372	0.4221	8.13e-09
1-palmitoyl-2-linoleoyl-GPI (16:0/18:2)	0.0001028	0.2619	0.394	9.81e-09
gamma-glutamylglutamine	8.7e-11	-0.465	-0.3743	1.04e-08
caprate (10:0)	0.0003668	-0.2381	-0.3988	1.28e-08
ceramide (d18:1/20:0, d16:1/22:0, d20:1/18:0)*	8.02e-14	0.4966	0.3821	1.7e-08
N-acetylcarnosine	2.77e-06	0.2445	0.3015	1.71e-08
N6-carbamoylthreonyladenosine	0.180456	0.0826	0.3885	1.8e-08
oxalate (ethanedioate)	0.0006171	-0.2106	-0.3878	1.93e-08
sphingomyelin (d18:2/24:2)*	1.49e-22	-0.5794	-0.3554	1.97e-08
cysteine-glutathione disulfide	3.33e-08	-0.3756	-0.3826	1.97e-08
2-oxoarginine*	2.35e-12	0.4539	0.395	2.38e-08
glycerate	3.9e-05	-0.2644	-0.3877	2.72e-08
3-(3-amino-3-carboxypropyl)uridine*	0.109746	0.0975	0.3865	2.72e-08
argininate*	0.0001041	0.2462	0.4	2.98e-08
glycine	4.23e-10	-0.345	-0.4066	3.44e-08
1-(1-enyl-stearoyl)-2-oleoyl-GPE (P-18:0/18:1)	0.0122565	-0.1707	-0.3881	3.46e-08
ribonate	0.0062931	0.1754	0.3904	3.68e-08
nonadecanoate (19:0)	0.0010976	-0.2156	-0.3909	3.91e-08
gamma-glutamylphenylalanine	2.49e-07	0.3092	0.3722	4.06e-08
carotene diol (3)	2.88e-10	-0.3805	-0.3977	5.16e-08
carnitine	5.37e-06	0.2993	0.3791	5.81e-08
C-glycosyltryptophan	0.245506	0.0688	0.3566	6.48e-08
cystine	0.759713	0.0194	0.3673	6.52e-08
arachidoylcarnitine (C20)*	1.59e-10	-0.4228	-0.3716	7.11e-08
pregnenetriol disulfate*	0.0031789	0.1688	0.3487	7.48e-08
16a-hydroxy DHEA 3-sulfate	0.0323115	0.1254	0.3939	7.87e-08
2-butenoylglycine	0.0001169	-0.1945	-0.3566	8.66e-08
1-dihomo-linolenylglycerol (20:3)	2.58e-09	0.3348	0.361	8.86e-08
lactosyl-N-palmitoyl-sphingosine (d18:1/16:0)	7.03e-18	-0.5771	-0.3709	9.54e-08
trans-2-hexenoylglycine	1.76e-05	-0.235	-0.3586	9.64e-08
2-aminoheptanoate	0.0166324	0.1547	0.3815	1.05e-07
suberate (C8-DC)	0.0061343	0.1708	0.3729	1.31e-07
S-adenosylhomocysteine (SAH)	0.0012093	0.191	0.3545	1.53e-07
1-(1-enyl-palmitoyl)-2-arachidonoyl-GPC (P-16:0/20:4)*	0.0001839	-0.2526	-0.3665	1.54e-07
N-stearoyl-sphingadienine (d18:2/18:0)*	3.85e-10	0.4021	0.3508	1.73e-07
1-palmitoyl-2-linoleoyl-GPE (16:0/18:2)	7.08e-15	0.5254	0.3655	1.94e-07
eicosenoylcarnitine (C20:1)*	6.38e-12	-0.4611	-0.3505	1.94e-07
3beta-hydroxy-5-cholestenoate	1.99e-07	-0.3552	-0.3645	2.21e-07
1-stearoyl-2-linoleoyl-GPC (18:0/18:2)*	0.0033558	-0.1863	-0.3646	3.15e-07
3-methyl-2-oxobutyrate	5.58e-05	0.2535	0.3433	3.82e-07
cis-3,4-methyleneheptanoylcarnitine	0.0003095	0.241	0.3536	4.8e-07
5-hydroxylysine	5.25e-05	0.2746	0.3178	5.81e-07
linoleoylcholine*	1.57e-11	-0.4332	-0.3607	5.94e-07
1-stearoyl-2-arachidonoyl-GPI (18:0/20:4)	2.83e-14	0.5128	0.335	6.96e-07
androstenediol (3beta,17beta) disulfate (1)	0.0026254	0.1717	0.33	7.72e-07
1-linoleoyl-GPA (18:2)*	6.7e-07	-0.2618	-0.3297	8.72e-07
N-acetylalanine	0.0105931	0.1647	0.3352	9.44e-07
2-aminoadipate	1.43e-09	0.3911	0.3244	9.89e-07
sphingomyelin (d17:1/16:0, d18:1/15:0, d16:1/17:0)*	2.61e-09	-0.3853	-0.3258	1.21e-06
N-acetylisoleucine	1.17e-10	0.403	0.3147	1.27e-06
N1-methylinosine	0.0097497	0.1626	0.3278	1.42e-06
branched chain 14:0 dicarboxylic acid**	0.0008958	-0.2224	-0.3396	1.62e-06
N-acetylvaline	2.18e-07	0.3376	0.3317	1.68e-06
picolinoylglycine	7.57e-12	0.3999	0.3309	1.7e-06
3,4-dihydroxybutyrate	0.0082884	0.1711	0.3262	1.77e-06
beta-alanine	1.24e-05	0.2916	0.3265	1.93e-06
octadecadienedioate (C18:2-DC)*	2.23e-07	-0.332	-0.3478	1.98e-06
butyrylcarnitine (C4)	2.75e-07	0.3339	0.3387	2.26e-06
(2 or 3)-decenoate (10:1n7 or n8)	0.0005829	-0.2289	-0.3378	2.3e-06
1-myristoyl-2-arachidonoyl-GPC (14:0/20:4)*	8.01e-12	0.4406	0.3355	2.39e-06
N1-methyladenosine	0.0004774	0.227	0.3245	2.51e-06
S-methylcysteine	3.16e-08	-0.3686	-0.3384	2.56e-06
1-linoleoylglycerol (18:2)	6.12e-14	0.5192	0.3126	2.93e-06
N-acetylcitrulline	2.21e-08	0.3566	0.303	3.36e-06
ceramide (d16:1/24:1, d18:1/22:1)*	2.72e-07	0.3419	0.3171	3.41e-06
1-linoleoyl-2-linolenoyl-GPC (18:2/18:3)*	4.5e-05	-0.2668	-0.3307	3.54e-06
tetradecadienoate (14:2)*	6.19e-06	-0.293	-0.3244	3.55e-06
gamma-glutamylcitrulline*	4.79e-09	-0.4066	-0.3142	3.59e-06
S-methylcysteine sulfoxide	0.0005699	-0.228	-0.3311	3.71e-06
docosahexaenoylcholine	5.59e-08	-0.3365	-0.3275	4.01e-06
oxindolylalanine	0.0041865	-0.1953	-0.3251	4.2e-06
andro steroid monosulfate C19H28O6S (1)*	0.598402	0.0316	0.3069	5.53e-06
phosphate	0.0036011	-0.1857	-0.2867	6.4e-06
dihomo-linolenoylcarnitine (C20:3n3 or 6)*	0.701981	0.0251	0.3041	7.16e-06
1,2-dipalmitoyl-GPC (16:0/16:0)	5.01e-06	-0.302	-0.314	9.95e-06
arginine	0.0004576	-0.2343	-0.3139	1.18e-05
1-(1-enyl-palmitoyl)-2-linoleoyl-GPE (P-16:0/18:2)*	1.87e-06	-0.327	-0.3078	1.19e-05
heneicosapentaenoate (21:5n3)	0.0013369	-0.1976	-0.2975	1.22e-05
1-(1-enyl-stearoyl)-2-arachidonoyl-GPE (P-18:0/20:4)*	0.234889	-0.0791	-0.3148	1.24e-05
S-methylmethionine	7.49e-07	-0.2974	-0.28	1.43e-05
3-hydroxybutyrate (BHBA)	0.0004104	-0.2335	-0.3132	1.51e-05
N,N,N-trimethyl-5-aminovalerate	1.13e-05	0.288	0.3052	1.57e-05
1-(1-enyl-palmitoyl)-GPE (P-16:0)*	2.62e-09	-0.4047	-0.2997	1.58e-05
gamma-glutamylglycine	1.25e-08	-0.3295	-0.3198	1.73e-05
N-acetylleucine	1.65e-12	0.4525	0.293	1.83e-05
dodecadienoate (12:2)*	0.0003583	-0.2414	-0.2996	2.17e-05
N-acetylaspartate (NAA)	4.55e-06	-0.2929	-0.309	2.34e-05
3-hydroxydecanoylcarnitine	6.32e-07	-0.3375	-0.2864	2.44e-05
hypotaurine	6.89e-07	-0.3233	-0.2959	2.47e-05
glycoursodeoxycholic acid sulfate (1)	4.46e-08	0.3393	0.2838	2.52e-05
homoarginine	0.0001807	0.2298	0.2898	2.62e-05
3-methyl-2-oxovalerate	3.35e-10	0.3403	0.2582	2.67e-05
azelate (C9-DC)	0.0493739	0.1215	0.298	2.83e-05
sphingadienine	0.0003735	0.1629	0.2341	2.97e-05
glycerophosphorylcholine (GPC)	2.32e-08	-0.3834	-0.2895	3e-05
1-carboxyethylhistidine	4.62e-07	0.2593	0.2179	3.33e-05
3-hydroxyoctanoylcarnitine (1)	5.72e-07	-0.3434	-0.2748	3.63e-05
leucylglycine	0.621969	-0.0277	-0.2785	3.63e-05
1-(1-enyl-palmitoyl)-2-oleoyl-GPE (P-16:0/18:1)*	0.0065237	-0.1876	-0.2869	3.82e-05
pantothenate	0.0002862	0.2253	0.3137	3.88e-05
propionylglycine	0.0002342	-0.2142	-0.2868	4.03e-05
dihydroorotate	1.16e-08	0.3772	0.2949	4.04e-05
gamma-glutamyltyrosine	2.82e-05	0.2697	0.277	4.16e-05
linoleoyl-docosahexaenoyl-glycerol (18:2/22:6) [1]*	1.89e-05	0.2552	0.2307	4.4e-05
N1-Methyl-2-pyridone-5-carboxamide	0.0080635	0.1732	0.2952	4.71e-05
5,6-dihydrouridine	0.972822	0.0021	0.2853	5.87e-05
glycine conjugate of C10H14O2 (1)*	5.25e-05	0.2735	0.2776	6.2e-05
glycocholenate sulfate*	0.0004144	0.2284	0.2894	6.2e-05
glycine conjugate of C10H12O2*	4.78e-06	0.2823	0.2617	6.56e-05
N-acetylphenylalanine	1.14e-12	0.4451	0.2731	7e-05
4-oxo-retinoic acid	0.36691	-0.0595	-0.2774	7.12e-05
isovalerylcarnitine (C5)	2.74e-07	0.3312	0.2761	7.74e-05
branched-chain, straight-chain, or cyclopropyl 12:1 fatty acid*	0.0004645	-0.2266	-0.2813	7.89e-05
9-hydroxystearate	0.002479	-0.1836	-0.264	7.97e-05
hexanoylglycine	0.0001987	-0.1947	-0.2606	8.41e-05
cysteine s-sulfate	4.33e-06	0.298	0.2687	8.63e-05
lithocholate sulfate (1)	3.4e-05	0.2822	0.2696	8.79e-05
5-dodecenoate (12:1n7)	4.61e-07	-0.3137	-0.2571	8.85e-05
methionine sulfoxide	0.750984	0.0214	-0.2788	9.02e-05
guanidinoacetate	0.0163077	-0.1557	-0.2609	9.81e-05
glutamine	2.24e-10	-0.4363	-0.2664	9.91e-05
N-acetylneuraminate	0.197076	0.0833	0.2588	0.0001019
androstenediol (3beta,17beta) disulfate (2)	0.130407	0.0847	0.2517	0.0001028
cortisone	0.91237	0.0068	-0.2949	0.0001038
hydroxy-N6,N6,N6-trimethyllysine*	0.0599504	0.1162	0.279	0.000104
trigonelline (N'-methylnicotinate)	0.0076555	-0.1761	-0.2774	0.000116
1-stearoyl-2-arachidonoyl-GPC (18:0/20:4)	1.54e-10	0.4403	0.2597	0.0001331
deoxycholate	4.45e-10	0.413	0.2574	0.0001347
1-palmitoyl-2-docosahexaenoyl-GPC (16:0/22:6)	0.703201	0.0237	-0.2719	0.0001394
sphingomyelin (d18:1/17:0, d17:1/18:0, d19:1/16:0)	3.71e-06	-0.2911	-0.2567	0.0001434
alpha-ketobutyrate	1.83e-07	0.3496	0.271	0.0001486
eicosenoate (20:1)	0.0202244	-0.1539	-0.2648	0.0001533
sebacate (C10-DC)	0.0310133	0.1334	0.2702	0.0001571
glycohyocholate	1.98e-05	-0.2525	-0.2224	0.0001836
undecanedioate (C11-DC)	0.0340088	0.13	0.2692	0.0001872
lignoceroyl sphingomyelin (d18:1/24:0)	0.0005601	-0.237	-0.2554	0.0001906
5-methyluridine (ribothymidine)	0.167488	-0.0916	-0.2655	0.0001944
adipoylcarnitine (C6-DC)	0.872035	0.0103	0.272	0.0001946
palmitoylcholine	1.82e-08	-0.365	-0.2679	0.0001996
2-hydroxypalmitate	0.0133549	-0.1622	-0.2644	0.0002032
(16 or 17)-methylstearate (a19:0 or i19:0)	0.073444	-0.1177	-0.26	0.0002043
palmitoyl dihydrosphingomyelin (d18:0/16:0)*	1.1e-10	-0.4197	-0.2502	0.0002055
glycerophosphoethanolamine	0.0008309	-0.2292	-0.2566	0.0002446
1-palmitoyl-2-docosahexaenoyl-GPE (16:0/22:6)*	1.21e-17	0.5702	0.2435	0.000251
corticosterone	0.0002541	-0.2245	-0.236	0.0003371
N-acetylglutamate	3.85e-08	0.3627	0.2331	0.0003389
pregnenetriol sulfate*	0.472816	-0.0373	0.223	0.0003505
1-oleoyl-2-arachidonoyl-GPE (18:1/20:4)*	2.14e-12	0.4913	0.2402	0.000368
aconitate [cis or trans]	0.0175391	0.1551	0.2508	0.0003712
isoleucylglycine	0.0017219	-0.1625	-0.2462	0.0003719
succinoyltaurine	0.733953	0.0227	0.2483	0.0003769
oleoylcholine	4.52e-08	-0.3537	-0.2562	0.000382
sphingomyelin (d18:1/20:1, d18:2/20:0)*	9.29e-10	-0.3595	-0.2372	0.0003848
ceramide (d18:1/17:0, d17:1/18:0)*	0.001755	0.1868	0.2413	0.000419
docosahexaenoate (DHA; 22:6n3)	0.0340756	-0.1345	-0.2436	0.0004478
malonylcarnitine	0.325253	0.0668	0.2267	0.0004811
2-linoleoylglycerol (18:2)	0.0044499	0.1669	0.2167	0.0005256
imidazole lactate	0.0002917	-0.2483	-0.2361	0.0005342
octadecenedioate (C18:1-DC)	7.96e-08	-0.3487	-0.2508	0.0005399
indoleacetylglutamine	0.250105	0.0635	0.1863	0.00054
pregnanediol-3-glucuronide	7.26e-08	-0.3352	-0.25	0.0005414
sphingomyelin (d17:1/14:0, d16:1/15:0)*	0.0002701	-0.2217	-0.2227	0.0005634
bilirubin (Z,Z)	0.0007133	-0.2291	-0.2374	0.0006412
imidazole propionate	0.0039944	0.1702	0.2434	0.0006456
(14 or 15)-methylpalmitate (a17:0 or i17:0)	0.140134	-0.0927	-0.2397	0.0006708
alpha-hydroxycaproate	0.0035268	0.1858	0.2456	0.0006906
chenodeoxycholic acid sulfate (1)	3.12e-05	0.2227	0.1907	0.0006911
1-palmitoyl-2-arachidonoyl-GPC (16:0/20:4n6)	2.98e-10	0.4284	0.2359	0.0007177
N-palmitoyl-sphingosine (d18:1/16:0)	0.0022172	0.2033	0.2325	0.0007205
tyrosine	1.47e-11	0.4556	0.233	0.0007385
taurine	0.0001235	-0.2486	-0.2317	0.0007662
N-acetyltyrosine	6.62e-09	0.3813	0.2339	0.0007889
6-bromotryptophan	0.0272397	-0.1491	0.2356	0.0009345
gamma-glutamylalanine	0.024013	0.1527	0.2328	0.0009669
2-hydroxydecanoate	0.000881	-0.2268	-0.2328	0.0009891
13-HODE + 9-HODE	0.908986	-0.0077	-0.2267	0.0010057
3beta,7alpha-dihydroxy-5-cholestenoate	0.026303	-0.1551	-0.2236	0.0010395
androstenediol (3beta,17beta) monosulfate (2)	0.262122	0.0676	0.244	0.0010429
butyrate/isobutyrate (4:0)	0.784365	0.0169	0.2289	0.0010872
threonate	0.0141671	-0.1588	-0.2286	0.0011065
octadecanedioate (C18-DC)	1.64e-07	-0.3419	-0.231	0.0011699
1-palmitoyl-2-stearoyl-GPC (16:0/18:0)	0.0490011	-0.1363	-0.225	0.0011853
1-palmitoyl-GPE (16:0)	0.0060445	-0.1778	-0.2354	0.0011975
5alpha-androstan-3alpha,17beta-diol disulfate	0.803583	-0.0129	0.0806	0.0012978
androstenediol (3beta,17beta) monosulfate (1)	0.50038	-0.0387	0.2072	0.0013114
cystathionine	2.81e-07	0.3264	0.2304	0.0013913
N-oleoylserine	0.0110942	-0.1676	-0.2273	0.0015728
1-stearoyl-GPC (18:0)	7.07e-05	-0.2605	-0.2278	0.0015975
stearoylcholine*	1.11e-07	-0.3336	-0.2257	0.0016479
1-linoleoyl-GPG (18:2)*	0.0001951	0.2305	0.2292	0.0017428
N-acetylglucosaminylasparagine	0.0264362	0.1437	0.219	0.0018566
cysteinylglycine disulfide*	0.228401	0.0787	0.213	0.0019133
N2,N5-diacetylornithine	0.094983	-0.1084	-0.2111	0.0019174
2-hydroxystearate	0.0214646	-0.1514	-0.222	0.0020103
isoursodeoxycholate	1.74e-05	0.285	0.2235	0.0020472
arachidonoylcarnitine (C20:4)	0.517556	0.0436	0.1908	0.0022526
adenine	0.0013617	0.2029	0.2092	0.0022539
3-carboxy-4-methyl-5-propyl-2-furanpropanoate (CMPF)	0.456972	-0.0476	-0.2123	0.0022729
N-acetylkynurenine (2)	1.11e-08	0.3469	0.1761	0.0022743
1-stearoyl-2-oleoyl-GPC (18:0/18:1)	5.96e-06	0.305	0.2108	0.0024625
eicosapentaenoate (EPA; 20:5n3)	0.069468	-0.116	-0.2129	0.0024742
dodecenedioate (C12:1-DC)*	3.3e-06	-0.2992	-0.211	0.0025223
2-hydroxyarachidate*	0.0007946	0.2198	0.2154	0.0025293
phosphoethanolamine	1.25e-05	-0.2917	-0.2119	0.0025717
2-hydroxybutyrate/2-hydroxyisobutyrate	0.0004322	0.2356	0.2131	0.0026092
linoleoyl ethanolamide	0.334209	-0.061	-0.2072	0.0026736
3-hydroxylaurate	0.0509669	-0.1331	-0.2092	0.0027174
3-hydroxydecanoate	0.0452545	-0.1355	-0.2084	0.0027336
nisinate (24:6n3)	7.19e-10	0.3427	0.1896	0.0028176
citrate	5.13e-06	-0.309	-0.2071	0.0029382
N-acetyl-beta-alanine	8.9e-06	0.2968	0.2056	0.0029906
gamma-glutamylhistidine	0.525838	0.0432	0.2068	0.0033054
3-hydroxyoctanoate	0.0346819	-0.1419	-0.205	0.0033778
4-hydroxyphenylpyruvate	9.29e-06	0.2646	0.1839	0.0035171
trans-urocanate	0.0007356	-0.2302	-0.2004	0.0036368
docosadienoate (22:2n6)	0.187016	-0.0878	-0.2048	0.0038138
flavin adenine dinucleotide (FAD)	2.65e-08	0.3512	0.1962	0.0039243
linoleoylcarnitine (C18:2)*	1.05e-05	-0.2915	-0.2037	0.0040664
sphingomyelin (d18:2/23:1)*	1.93e-07	-0.2933	-0.1727	0.0041522
phenol sulfate	2.1e-05	0.2844	0.204	0.0041601
3-indoxyl sulfate	0.0002369	0.2547	0.1975	0.0042044
myristoleoylcarnitine (C14:1)*	1.17e-05	-0.2884	-0.2011	0.0042081
1-methyl-4-imidazoleacetate	0.69124	0.0258	0.195	0.0042253
3-methylcrotonylglycine	0.0451834	-0.1192	-0.2081	0.004256
eicosapentaenoylcholine	7.4e-05	-0.2178	-0.191	0.0044559
phenyllactate (PLA)	0.214451	0.0762	-0.1919	0.0044882
N-acetylserine	0.489202	0.0446	0.1986	0.0044888
tricosanoyl sphingomyelin (d18:1/23:0)*	0.001745	-0.1982	-0.1925	0.0046648
retinol (Vitamin A)	2.37e-05	0.275	0.1952	0.0047551
pregnanolone/allopregnanolone sulfate	0.0868367	0.0858	0.1618	0.004871
indoleacetoylcarnitine*	0.635134	0.031	0.1872	0.0049177
creatine	3.21e-09	0.3518	0.1716	0.0051327
laurylcarnitine (C12)	1.01e-06	-0.3224	-0.1952	0.0052657
laurate (12:0)	0.0042657	-0.1974	-0.1837	0.0052919
nicotinamide	0.21607	0.0839	0.1918	0.0053177
sphingomyelin (d18:1/22:1, d18:2/22:0, d16:1/24:1)*	1.13e-05	-0.2743	-0.196	0.0055951
1-arachidonoyl-GPI (20:4)*	8.31e-05	0.2609	0.1983	0.0056277
xanthurenate	2.55e-08	0.3447	0.1974	0.0056681
androstenediol (3alpha, 17alpha) monosulfate (2)	0.0139379	-0.1327	0.1876	0.0056955
5alpha-androstan-3alpha,17beta-diol monosulfate (1)	0.813091	0.0146	0.1808	0.0056984
pregnenediol disulfate (C21H34O8S2)*	0.698371	0.0217	0.1742	0.0057807
N-acetyl-2-aminoadipate	0.0073569	0.1668	0.188	0.0057974
caprylate (8:0)	0.0870849	-0.1138	-0.2013	0.0058638
cortisol	0.696319	-0.0248	-0.2077	0.0062481
N6,N6,N6-trimethyllysine	0.0196899	0.1416	0.1943	0.0065427
N-stearoylserine*	0.140039	-0.0915	-0.194	0.006688
sphingomyelin (d18:1/25:0, d19:0/24:1, d20:1/23:0, d19:1/24:0)*	0.0115038	-0.1703	-0.1874	0.0068497
gamma-glutamyl-alpha-lysine	0.730022	-0.0225	0.1929	0.0072656
gamma-glutamyltryptophan	0.756963	0.0202	0.1886	0.007567
1-oleoyl-2-linoleoyl-GPE (18:1/18:2)*	8.52e-07	0.3316	0.189	0.0075853
1-arachidonoyl-GPC (20:4n6)*	0.001726	-0.2104	-0.1884	0.0076444
dopamine 3-O-sulfate	0.135348	-0.1016	-0.1872	0.0077348
palmitoylcarnitine (C16)	0.663942	0.0279	0.1848	0.007756
7-methylguanine	0.0665926	0.1166	0.1883	0.0082051
dihomo-linoleoylcarnitine (C20:2)*	2.28e-06	-0.3188	-0.1808	0.008295
cysteine	0.008025	0.1807	0.186	0.0091278
pentose acid*	0.323692	-0.0648	-0.1869	0.0091589
arachidonoylcholine	8.56e-05	-0.2513	-0.1909	0.0092283
glycosyl ceramide (d18:1/20:0, d16:1/22:0)*	1.58e-05	-0.2976	-0.1776	0.0096851
glycochenodeoxycholate glucuronide (1)	2.17e-07	0.3159	0.1851	0.0097142
sphingomyelin (d18:1/22:2, d18:2/22:1, d16:1/24:2)*	1.05e-11	-0.3941	-0.1649	0.0097738
gulonate*	0.207486	0.0811	0.1716	0.0099909
1-palmitoyl-2-oleoyl-GPC (16:0/18:1)	2.19e-06	0.3176	0.1788	0.0100216
10-undecenoate (11:1n1)	0.0104881	-0.1764	-0.1783	0.0100787
1-stearoyl-2-oleoyl-GPS (18:0/18:1)	0.0366243	0.1352	0.1898	0.0101799
succinate	0.0043831	-0.1882	-0.1817	0.0105979
oleoyl ethanolamide	0.584386	-0.0351	-0.1792	0.0106773
5-dodecenoylcarnitine (C12:1)	5.49e-07	-0.3247	-0.1746	0.011005
histidine	0.135009	-0.1007	-0.1798	0.0112569
ceramide (d18:2/24:1, d18:1/24:2)*	0.0011757	0.215	0.1739	0.0113237
alpha-ketoglutaramate*	0.0201265	-0.1492	-0.1764	0.0113489
2-aminooctanoate	6.47e-09	-0.3723	-0.185	0.0115064
methionine sulfone	0.0086041	-0.1661	-0.1734	0.0115338
1-palmitoyl-2-linoleoyl-GPC (16:0/18:2)	0.358107	0.0606	-0.181	0.0116598
tridecenedioate (C13:1-DC)*	0.0008969	-0.2245	-0.1699	0.0117582
glutamine conjugate of C7H12O2*	0.0011905	-0.2035	-0.1824	0.0123329
hydantoin-5-propionate	0.0024634	0.2022	0.1752	0.0127391
acetoacetate	0.0007656	-0.2174	-0.1797	0.0129023
phenylalanylglycine	0.429219	-0.0402	-0.1536	0.0130897
4-methylhexanoylglutamine	0.0001117	-0.2369	-0.1642	0.0137838
N-acetyl-1-methylhistidine*	0.0078997	0.1755	0.1725	0.0138341
N-delta-acetylornithine	0.0012796	-0.2093	-0.1798	0.0141876
mannitol/sorbitol	0.0255888	0.1427	0.1785	0.0145467
2-ketocaprylate	4.38e-05	-0.2635	-0.1812	0.0151207
biliverdin	0.0219409	-0.1545	-0.1668	0.015229
7-alpha-hydroxy-3-oxo-4-cholestenoate (7-Hoca)	0.0530768	0.1297	0.1665	0.0155669
dimethylglycine	0.551872	-0.0354	0.1774	0.0161717
margaroylcarnitine (C17)*	0.001457	-0.2116	-0.1692	0.0162852
stearoylcarnitine (C18)	9.45e-05	-0.258	-0.1698	0.0163691
1-oleoyl-2-docosahexaenoyl-GPE (18:1/22:6)*	4.99e-13	0.4461	0.1628	0.0165205
5alpha-androstan-3beta,17beta-diol disulfate	0.379412	0.0478	0.1386	0.0166755
N6-methyladenosine	0.0990155	0.1098	0.1674	0.0167161
dihomo-linoleate (20:2n6)	0.380972	-0.0584	-0.1668	0.0170643
N,N,N-trimethyl-alanylproline betaine (TMAP)	0.209927	-0.0696	0.1528	0.0170942
beta-hydroxyisovalerate	9.35e-08	0.3416	0.1607	0.0171519
ursodeoxycholate	0.0031583	0.1835	0.1548	0.0174218
1-linolenoyl-GPC (18:3)*	0.0006823	-0.232	-0.1666	0.0178501
myristoleate (14:1n5)	0.0027515	-0.1786	-0.1505	0.0178566
gamma-glutamylthreonine	0.42166	0.0517	0.1742	0.0191717
4-hydroxyphenylacetylglutamine	5.21e-07	0.3253	0.1528	0.019202
N-acetylputrescine	0.0205139	0.1535	0.1616	0.0197899
hexadecadienoate (16:2n6)	0.243693	-0.0717	-0.1542	0.020067
4-hydroxyphenylacetate	1.01e-07	0.3468	0.1605	0.0202696
1-linoleoyl-GPE (18:2)*	0.0028259	-0.1967	-0.1686	0.0203187
linoleate (18:2n6)	0.287542	-0.0706	-0.1585	0.0203611
2'-O-methyluridine	0.0225679	-0.1475	-0.1655	0.0220661
arabitol/xylitol	0.618465	0.0308	0.1624	0.0222477
butyrylglycine	0.0549105	-0.1077	-0.1601	0.0225346
ornithine	0.8244	0.0144	0.1623	0.0231798
4-acetamidobutanoate	0.65605	0.0292	0.1557	0.0234431
undecenoylcarnitine (C11:1)	0.429776	-0.0528	0.1551	0.0243364
5alpha-androstan-3beta,17alpha-diol disulfate	0.0158676	-0.1524	-0.1437	0.0244264
10-nonadecenoate (19:1n9)	0.357411	-0.0596	-0.1561	0.0254584
glycosyl-N-palmitoyl-sphingosine (d18:1/16:0)	5.19e-11	-0.457	-0.1532	0.0255675
1-methylhistidine	0.91682	0.0065	0.1624	0.0262708
1-palmitoyl-GPI (16:0)	0.292418	0.0678	0.1571	0.0268627
picolinate	0.043623	-0.1257	-0.1624	0.0270305
5alpha-pregnan-3beta,20alpha-diol monosulfate (2)	5.86e-05	-0.2457	-0.1612	0.0285858
glutarate (C5-DC)	0.265151	0.0757	0.1507	0.0296705
carboxyethyl-GABA	0.269598	-0.0726	-0.1526	0.0300372
3-hydroxy-3-methylglutarate	0.054919	0.1252	0.1414	0.0302464
3-aminoisobutyrate	0.0121678	-0.1672	-0.1545	0.0303958
sphingomyelin (d18:1/21:0, d17:1/22:0, d16:1/23:0)*	0.0467226	-0.1263	-0.1446	0.0312989
stearate (18:0)	0.88746	0.0094	-0.1536	0.0313882
sphingomyelin (d18:1/18:1, d18:2/18:0)	0.375703	0.0526	0.1423	0.0315138
5alpha-pregnan-diol disulfate	0.159299	0.0785	0.1331	0.0315782
hyocholate	0.108298	-0.1008	-0.1335	0.031761
phenylacetate	0.0080068	-0.18	-0.1483	0.03199
sucrose	0.0023858	0.1793	0.1259	0.0341035
phenol glucuronide	9.11e-06	0.2429	0.1227	0.0344603
taurodeoxycholate	1.32e-07	0.3275	0.1443	0.0351728
betaine	1.3e-05	-0.2667	-0.1512	0.0351974
sphingomyelin (d18:1/24:1, d18:2/24:0)*	1.09e-07	-0.3526	-0.1427	0.0362063
docosahexaenoylcarnitine (C22:6)*	4.63e-05	-0.2558	-0.1409	0.0365404
lysine	0.249804	0.0751	0.1541	0.0373353
5alpha-androstan-3alpha,17beta-diol monosulfate (2)	0.106713	-0.0778	0.0762	0.0380116
2-hydroxyglutarate	0.657589	0.0266	0.1373	0.0385913
choline	0.3486	0.0593	0.1443	0.0396327
3-hydroxyoleate*	0.566311	-0.0414	-0.1364	0.0397986
2-hydroxyphenylacetate	0.0009928	0.2087	0.1395	0.0403966
ximenoylcarnitine (C26:1)*	0.924468	-0.0063	0.1377	0.0411048
glycodeoxycholate	7.51e-05	0.2191	0.1173	0.0411407
1-myristoyl-2-palmitoyl-GPC (14:0/16:0)	2.16e-05	0.2864	0.142	0.0417536
glutamine conjugate of C6H10O2 (1)*	0.0088981	-0.1658	-0.1501	0.0423958
fumarate	0.0754918	-0.1242	-0.1383	0.0430021
nicotinamide riboside	0.970147	0.0025	-0.138	0.0434786
decanoylcarnitine (C10)	8.55e-06	-0.2951	-0.1459	0.0436985
acisoga	0.0038394	0.1933	0.1421	0.0446044
bilirubin degradation product, C17H18N2O4 (3)**	0.0171173	-0.1624	-0.1385	0.0451401
phenylalanine	1.7e-07	0.3474	0.1383	0.0460882
malate	0.273417	-0.0743	-0.1383	0.0467975
1-palmitoleoyl-GPC (16:1)*	0.287182	0.0708	0.1409	0.0471531
3-(4-hydroxyphenyl)lactate	0.0001389	0.2324	0.1287	0.0478839
21-hydroxypregnenolone disulfate	0.125086	-0.0928	0.1361	0.0488764
(12 or 13)-methylmyristate (a15:0 or i15:0)	0.449957	-0.0395	-0.1174	0.050054
hexanoylglutamine	0.0012041	-0.2103	-0.1386	0.0515775
linolenate [alpha or gamma; (18:3n3 or 6)]	0.512872	-0.0433	-0.132	0.0520887
1-stearoyl-2-oleoyl-GPI (18:0/18:1)*	0.875479	-0.0106	0.1358	0.0523866
2-methylserine	0.313702	-0.0661	-0.1418	0.052926
glucuronide of C10H18O2 (1)*	0.0783371	0.1129	0.1344	0.0539482
3-hydroxyhexanoate	0.19331	-0.0842	-0.14	0.0539933
3-ureidopropionate	0.0959955	-0.108	-0.1311	0.0547973
4-hydroxyphenylacetoylcarnitine	8.2e-05	0.2431	0.1222	0.05574
glycodeoxycholate 3-sulfate	0.0008896	0.2227	0.1362	0.056269
taurocholenate sulfate*	0.62344	0.033	0.137	0.0575283
3-methylglutarylcarnitine (2)	0.0124543	0.1563	0.1331	0.057567
ceramide (d18:1/14:0, d16:1/16:0)*	0.0157092	0.1583	0.1348	0.058042
epiandrosterone sulfate	0.0001869	-0.2287	-0.1234	0.0592046
adrenate (22:4n6)	0.0067778	0.1842	0.1301	0.0602867
tryptophan betaine	0.709333	0.0255	-0.1249	0.0613786
N-formylanthranilic acid	0.741154	-0.0218	-0.1326	0.0617516
tetradecadienedioate (C14:2-DC)*	0.0031575	-0.1928	-0.1288	0.0661701
branched-chain, straight-chain, or cyclopropyl 10:1 fatty acid (2)*	0.0178079	0.1519	0.1235	0.0667237
cholic acid glucuronide	0.616963	0.0313	-0.1133	0.0680476
docosapentaenoate (n3 DPA; 22:5n3)	0.578309	-0.0356	-0.1262	0.0693866
4-hydroxy-2-oxoglutaric acid	0.194736	0.0869	0.1285	0.0696211
N6-carboxymethyllysine	0.567189	0.0374	0.1284	0.0702599
glutamine conjugate of C6H10O2 (2)*	0.0231156	-0.1438	-0.1294	0.0746348
myristate (14:0)	0.568003	-0.037	-0.1204	0.0765572
allantoin	0.0774931	-0.1169	-0.1271	0.076837
cis-4-decenoate (10:1n6)*	0.0489271	-0.1309	-0.1282	0.0776698
bilirubin degradation product, C17H18N2O4 (2)**	0.0146346	-0.1663	-0.1212	0.0788442
heptenedioate (C7:1-DC)*	0.364269	-0.0608	-0.1203	0.0795372
kynurenate	1.02e-05	0.2823	0.1235	0.0815865
3-hydroxyoctanoylcarnitine (2)	0.0009457	-0.2311	-0.1089	0.0816816
cis-urocanate	0.117263	-0.0978	-0.1178	0.0832019
glycerol	0.188514	0.081	0.1075	0.0841133
tryptophan	0.0487917	0.1248	0.1153	0.0841282
maleate	0.0473043	0.1358	0.1165	0.0865014
N,N-dimethylalanine	0.0089919	-0.171	-0.1261	0.0890548
pseudouridine	0.115634	-0.0987	0.1184	0.0912835
1-stearoyl-GPE (18:0)	0.557935	-0.0382	-0.1219	0.0915527
citraconate/glutaconate	0.574464	-0.0369	-0.1224	0.0921149
hexadecanedioate (C16-DC)	0.0125939	-0.1594	-0.1207	0.0928316
N-methyltaurine	0.125673	-0.0926	-0.1111	0.0939965
1-arachidonylglycerol (20:4)	0.0011988	0.1953	0.1148	0.0951544
margarate (17:0)	0.882261	0.0098	-0.1182	0.0953255
sphingomyelin (d18:2/18:1)*	3.9e-05	-0.244	-0.1079	0.0993046
2-hydroxy-3-methylvalerate	1.03e-07	0.2986	0.1111	0.103186
L-urobilin	0.206679	0.0677	0.0839	0.103583
N-acetyl-isoputreanine	0.515262	0.0439	-0.1143	0.104456
citrulline	0.0003812	-0.2345	-0.1139	0.105123
pentadecanoate (15:0)	0.461014	-0.0475	-0.1128	0.105211
chiro-inositol	0.548672	-0.0331	-0.094	0.106682
androsterone glucuronide	0.288984	0.0618	0.0963	0.106796
anthranilate	0.945378	-0.0044	0.1151	0.107512
gamma-glutamyl-2-aminobutyrate	0.0146131	-0.1654	-0.1137	0.112555
1-linoleoyl-2-arachidonoyl-GPC (18:2/20:4n6)*	0.3017	-0.0638	-0.1156	0.11328
arabinose	0.0039977	0.1841	0.1023	0.116066
tetradecanedioate (C14-DC)	0.0352429	-0.1359	-0.1132	0.116517
fructose	0.0298816	0.1487	0.1104	0.117557
palmitoleoylcarnitine (C16:1)*	0.0006083	-0.218	-0.1034	0.120971
androstenediol (3alpha, 17alpha) monosulfate (3)	0.0045394	-0.1593	0.0928	0.122717
cytosine	0.709932	-0.0249	-0.1044	0.126227
sphingomyelin (d18:2/16:0, d18:1/16:1)*	8.8e-05	-0.2376	-0.0988	0.127772
trimethylamine N-oxide	0.335942	0.065	0.1082	0.129874
phenylpyruvate	0.0017362	0.2056	0.1044	0.13071
bilirubin (E,Z or Z,E)*	0.0374607	-0.1394	-0.1062	0.133069
3-hydroxydodecanedioate*	0.0022658	-0.1715	-0.0904	0.133856
cis-4-decenoylcarnitine (C10:1)	2.59e-05	-0.2744	-0.1076	0.137259
bilirubin degradation product, C17H18N2O4 (1)**	0.0117832	-0.1717	-0.1029	0.137413
hexadecenedioate (C16:1-DC)*	0.000105	-0.2555	-0.1075	0.138432
N-acetyltryptophan	3.07e-07	0.3193	0.1083	0.140281
xanthosine	0.27521	0.0689	0.0886	0.140406
N-formylphenylalanine	0.005654	0.1839	-0.1043	0.141214
cytidine	0.107385	0.1002	0.1048	0.141691
cys-gly, oxidized	0.185894	-0.0893	-0.0995	0.145332
GlcNAc sulfate conjugate of C21H34O2 steroid**	0.373055	-0.0547	0.0923	0.145462
cerotoylcarnitine (C26)*	0.707255	0.0244	0.0987	0.146073
1-ribosyl-imidazoleacetate*	0.580564	-0.0345	0.1017	0.1461
isovalerylglycine	0.238716	-0.0703	-0.1002	0.147855
beta-hydroxyisovaleroylcarnitine	0.928708	-0.0059	-0.1044	0.148938
taurolithocholate 3-sulfate	0.135277	-0.0995	-0.1045	0.150969
bilirubin (E,E)*	0.0094099	-0.1742	-0.1016	0.154854
isobutyrylglycine	0.513974	-0.0417	-0.1041	0.155062
N6,N6-dimethyllysine	0.393731	0.0567	0.1007	0.161363
alpha-hydroxyisovalerate	0.0005591	0.2018	0.1001	0.161584
1-oleoyl-GPG (18:1)*	0.0349519	0.1121	0.0715	0.161993
17alpha-hydroxypregnanolone glucuronide	0.0413784	-0.1001	0.0766	0.163703
1,5-anhydroglucitol (1,5-AG)	1.82e-07	-0.3606	0.0877	0.164965
phenylacetylglutamine	0.596905	-0.0358	-0.0948	0.166219
nonanoylcarnitine (C9)	4.74e-05	-0.2681	-0.098	0.16918
hexanoylcarnitine (C6)	0.676893	-0.027	0.0975	0.172625
cholate	0.846899	-0.0131	-0.0948	0.176366
3-hydroxyadipate	0.294639	-0.0697	-0.0907	0.181421
methylurea	0.020777	-0.1264	0.0847	0.181996
isovalerate (i5:0)	0.0015361	0.1969	0.0915	0.184796
homovanillate (HVA)	0.30853	0.0677	0.0883	0.187383
1-palmitoleoyl-2-linolenoyl-GPC (16:1/18:3)*	0.0137151	0.1536	0.0906	0.189513
docosadioate (C22-DC)	0.153016	-0.0958	-0.0916	0.190543
4-methyl-2-oxopentanoate	1.17e-06	0.265	0.0797	0.191626
bilirubin degradation product, C16H18N2O5 (4)**	0.0849459	-0.1172	-0.0917	0.192391
octanoylcarnitine (C8)	2.03e-05	-0.2777	-0.0946	0.192548
orotate	0.172648	-0.0919	-0.0905	0.192796
5-hydroxymethyl-2-furoic acid	0.723614	-0.0187	-0.0675	0.198404
gamma-glutamylmethionine	0.0809539	-0.1192	-0.0825	0.205671
stearoyl sphingomyelin (d18:1/18:0)	0.320287	-0.0643	0.0871	0.205955
17alpha-hydroxypregnenolone 3-sulfate	0.0993624	-0.0956	0.07	0.209358
N6-succinyladenosine	0.77932	0.0177	0.0811	0.211017
stearidonate (18:4n3)	0.632602	-0.0313	-0.0818	0.215758
3-hydroxysebacate	0.363177	-0.0554	-0.0793	0.218196
N-palmitoylglycine	0.77917	0.0176	-0.0869	0.219637
methionine	0.123855	0.1022	-0.0793	0.224806
sphingomyelin (d18:1/14:0, d16:1/16:0)*	0.0689951	-0.1187	-0.0819	0.22809
palmitoleate (16:1n7)	0.414824	-0.0496	-0.0786	0.228674
3-hydroxyisobutyrate	0.0004649	0.2237	0.0888	0.229111
sphingomyelin (d18:2/14:0, d18:1/14:1)*	0.292107	-0.056	0.0682	0.234317
bilirubin degradation product, C16H18N2O5 (2)**	0.130712	-0.1032	-0.083	0.235867
deoxycarnitine	0.0003103	-0.2267	-0.0719	0.240709
oleate/vaccenate (18:1)	0.843982	0.0131	-0.0794	0.245988
S-carboxyethylcysteine	0.0028789	0.1945	0.0848	0.249905
1-(1-enyl-palmitoyl)-2-arachidonoyl-GPE (P-16:0/20:4)*	0.6477	0.0303	-0.0831	0.251403
lanthionine	0.203518	-0.0803	-0.077	0.253057
8-methoxykynurenate	7.15e-05	0.2285	0.0647	0.26156
1-palmitoyl-GPC (16:0)	0.0596145	-0.126	-0.0804	0.261871
linolenoylcarnitine (C18:3)*	0.0058248	-0.1776	-0.0794	0.262101
N-acetyl-3-methylhistidine*	0.28517	-0.0671	-0.0725	0.270842
3b-hydroxy-5-cholenoic acid	0.506489	-0.041	-0.0814	0.27169
3-hydroxyhexanoylcarnitine (1)	0.632688	-0.0313	0.0787	0.271772
bilirubin degradation product, C16H18N2O5 (3)**	0.086219	-0.1154	-0.0778	0.272007
(N(1) + N(8))-acetylspermidine	5.6e-05	-0.2643	-0.0764	0.279262
2-palmitoyl-GPC (16:0)*	0.203687	-0.086	-0.0765	0.284245
bilirubin degradation product, C16H18N2O5 (1)**	0.134315	-0.0994	-0.0755	0.286849
N-methylproline	0.590783	-0.0366	-0.0754	0.291004
methylsuccinate	0.0444434	-0.1357	-0.0718	0.295606
phenylacetylcarnitine	0.0696997	0.1196	0.0745	0.299804
(R)-3-hydroxybutyrylcarnitine	0.191811	0.0842	0.0741	0.30457
dihomo-linolenate (20:3n3 or n6)	0.0234364	0.1515	0.0716	0.305074
N2-acetyl,N6-methyllysine	0.446401	0.0515	-0.0701	0.30764
eicosenedioate (C20:1-DC)*	0.0322915	-0.1375	-0.0677	0.313413
5alpha-pregnan-3beta,20alpha-diol disulfate	0.867363	-0.0097	0.0763	0.313839
1-oleoyl-GPE (18:1)	0.14868	-0.0946	-0.0721	0.314128
gamma-CEHC	0.555336	0.0397	0.0721	0.316806
2-hydroxysebacate	0.0123624	-0.1555	-0.0668	0.317655
1-stearoyl-2-linoleoyl-GPI (18:0/18:2)	0.360065	-0.0604	0.0695	0.317717
N-oleoyltaurine	0.136266	-0.0955	-0.0696	0.318894
etiocholanolone glucuronide	2.83e-07	-0.3266	-0.0681	0.322826
lignoceroylcarnitine (C24)*	0.792159	0.018	0.0682	0.329199
ascorbic acid 2-sulfate	0.019439	-0.1533	-0.0687	0.330277
N-acetylhistidine	0.770636	-0.0194	-0.0668	0.336165
6-oxopiperidine-2-carboxylate	0.382534	0.0598	0.0646	0.348366
oleoylcarnitine (C18:1)	0.0271307	-0.1449	-0.0664	0.34947
taurodeoxycholic acid 3-sulfate	0.0020473	0.1926	0.0656	0.350579
1-methyl-5-imidazoleacetate	0.029476	-0.1396	-0.068	0.353971
ascorbic acid 3-sulfate*	0.941093	0.0049	-0.0627	0.357036
N-acetylmethionine	0.0465297	-0.1285	-0.0648	0.357738
arachidonate (20:4n6)	0.401164	0.0557	-0.0653	0.359143
alpha-tocopherol	4.22e-05	0.2838	0.0609	0.363183
5-hydroxyindole sulfate	0.700087	-0.0256	-0.0596	0.363295
p-cresol glucuronide*	0.841383	0.0133	-0.0626	0.365347
glycochenodeoxycholate 3-sulfate	0.851637	0.0121	0.0651	0.368936
sphingomyelin (d18:1/20:0, d16:1/22:0)*	0.675098	-0.0283	-0.061	0.372102
serotonin	0.0032795	-0.1824	-0.0673	0.377455
3-hydroxyoleoylcarnitine	0.0520266	-0.1211	-0.0583	0.388389
deoxycholic acid glucuronide	1.55e-06	0.3129	0.0599	0.390032
3-carboxy-4-methyl-5-pentyl-2-furanpropionate (3-CMPFP)**	0.692559	-0.0256	-0.0618	0.390189
arabonate/xylonate	0.624263	-0.031	0.0599	0.390629
5,6-dihydrothymine	0.0927153	-0.1119	0.0592	0.397481
N-acetylthreonine	0.183927	0.0846	0.06	0.39941
1-stearoyl-GPI (18:0)	0.834253	-0.0137	-0.0593	0.399985
decadienedioic acid (C10:2-DC)**	0.594013	-0.0341	-0.06	0.400222
thyroxine	0.224693	-0.0803	0.0589	0.402309
uracil	0.0001777	-0.2616	-0.0576	0.404298
taurochenodeoxycholic acid 3-sulfate	0.252466	-0.0738	-0.0564	0.405579
creatinine	0.804425	0.0135	-0.0512	0.407354
galactonate	0.475572	0.0459	-0.0573	0.40893
dimethylarginine (SDMA + ADMA)	0.0256062	-0.1449	-0.0561	0.414963
urea	0.498416	-0.0422	0.0575	0.417611
cis-3,4-methyleneheptanoate	0.401107	0.0573	0.0564	0.42382
folate	0.927943	-0.0015	0.0139	0.425415
N2-acetyl,N6,N6-dimethyllysine	0.549653	0.0422	-0.0533	0.427398
bilirubin degradation product, C17H20N2O5 (2)**	0.139332	-0.1021	-0.055	0.427886
5alpha-androstan-3beta,17beta-diol monosulfate (2)	0.258666	-0.068	0.0467	0.430459
10-heptadecenoate (17:1n7)	0.822803	0.0141	-0.0533	0.4366
5-oxoproline	0.0003728	-0.2436	-0.0535	0.441082
pregnenolone sulfate	5.55e-05	-0.2362	-0.053	0.442132
sarcosine	0.922594	0.0066	-0.0529	0.443464
Fibrinopeptide A, phosphono-ser(3)*	0.371055	-0.0172	0.0216	0.44701
behenoyl sphingomyelin (d18:1/22:0)*	0.875371	-0.0107	0.051	0.452401
glucuronide of C10H18O2 (8)*	0.0229051	0.1139	0.0348	0.453204
sphingomyelin (d17:2/16:0, d18:2/15:0)*	0.112295	-0.0905	-0.0451	0.464547
3-methylhistidine	0.0901215	-0.1076	-0.0553	0.467006
2,3-dihydroxy-2-methylbutyrate	0.770431	0.0202	0.0491	0.467129
glutarylcarnitine (C5-DC)	0.0084379	-0.1719	0.05	0.468088
citramalate	0.0159165	0.1492	0.0472	0.470449
adenosine 5'-monophosphate (AMP)	0.930543	-0.006	0.0491	0.47673
retinal	0.0001602	0.2474	0.0501	0.476832
sedoheptulose	0.0021776	0.1836	0.0403	0.484395
isobutyrylcarnitine (C4)	0.593471	0.0347	-0.0517	0.486454
bilirubin degradation product, C17H20N2O5 (1)**	0.139452	-0.1017	-0.0484	0.48748
N-formylmethionine	0.756465	0.0203	-0.048	0.489694
pipecolate	0.338142	-0.0615	-0.0511	0.49042
3-methoxytyrosine	0.0007599	-0.2094	-0.0476	0.49055
dodecanedioate (C12-DC)	0.0316741	-0.1387	-0.0491	0.493358
2'-deoxyuridine	0.17187	0.0925	-0.0451	0.495424
5,6-dihydrouracil	0.0104782	-0.1669	0.0494	0.497663
eicosanedioate (C20-DC)	0.0002691	-0.2396	-0.0457	0.50866
xylose	0.158544	0.088	0.0441	0.5092
Fibrinopeptide A*	0.646016	-0.0166	-0.0329	0.51249
sphingomyelin (d18:1/20:2, d18:2/20:1, d16:1/22:2)*	0.0027517	-0.1802	-0.0419	0.521902
vanillic alcohol sulfate	0.247198	0.0586	-0.0313	0.522659
myo-inositol	0.207303	-0.0835	0.045	0.525748
pro-hydroxy-pro	0.0490796	-0.1239	-0.0459	0.53105
adenosine 3',5'-cyclic monophosphate (cAMP)	0.0016955	-0.212	-0.0418	0.537823
ethylmalonate	0.0390212	0.1387	0.0425	0.544233
N-acetylglutamine	0.117625	0.1078	-0.0414	0.544903
N-palmitoyl-sphingadienine (d18:2/16:0)*	0.570087	-0.0354	0.0436	0.549208
4-methoxyphenol sulfate	0.0337599	-0.1439	-0.0383	0.557712
glycosyl-N-stearoyl-sphingosine (d18:1/18:0)	0.0003435	-0.24	-0.0385	0.563247
ursocholate	0.994032	0.0003	-0.0281	0.566403
chenodeoxycholate	0.500771	0.043	-0.0375	0.569553
octadecenedioylcarnitine (C18:1-DC)*	3.82e-06	-0.3043	-0.0392	0.570474
2-stearoyl-GPE (18:0)*	0.378815	-0.058	-0.0409	0.572827
Fibrinopeptide A, des-ala(1)*	0.624044	-0.0202	-0.0302	0.578674
homocitrulline	0.804363	-0.0162	-0.0393	0.581611
2-aminobutyrate	0.612495	0.0345	-0.0393	0.583696
3-hydroxy-2-ethylpropionate	0.387545	0.0556	-0.0402	0.585004
uridine	0.108304	-0.109	-0.0382	0.586257
glutamine_degradant*	7.96e-07	-0.2598	0.0291	0.607082
threonine	0.509214	-0.0409	-0.0388	0.607854
N-palmitoylserine	0.984852	0.0011	0.0342	0.61452
N-stearoyltaurine	0.917896	0.0067	-0.0355	0.617945
cis-3,4-methyleneheptanoylglycine	0.331998	0.0605	0.0362	0.625439
1-oleoyl-GPI (18:1)	0.421466	-0.0556	-0.0341	0.627087
methylsuccinoylcarnitine	0.466163	-0.0481	0.0338	0.628939
myristoylcarnitine (C14)	0.0088847	-0.1673	-0.0325	0.631425
N2-acetyllysine	0.221427	0.0709	-0.0297	0.632327
spermidine	0.0790287	-0.1152	-0.0334	0.634864
tiglylcarnitine (C5:1-DC)	0.121539	0.1025	-0.0338	0.635206
pantoate	0.928244	-0.0054	-0.0289	0.646475
octadecanedioylcarnitine (C18-DC)*	0.0001379	-0.253	-0.0314	0.650957
N6-acetyllysine	0.262478	-0.0752	-0.031	0.661412
16-hydroxypalmitate	0.786491	0.0179	-0.0303	0.663713
nervonoylcarnitine (C24:1)*	0.0450834	-0.1369	0.0293	0.667517
sphingomyelin (d18:1/19:0, d19:1/18:0)*	0.706786	0.0232	0.0275	0.675301
heptanoate (7:0)	0.980372	-0.0016	-0.028	0.688627
4-imidazoleacetate	0.178384	-0.0897	0.0269	0.689436
indole-3-carboxylate	0.268753	-0.0694	-0.028	0.690221
taurocholate	0.0007577	0.2177	0.0276	0.690924
glycolithocholate	0.0004719	0.1965	0.0254	0.696655
5alpha-androstan-3alpha,17alpha-diol monosulfate	0.0001048	-0.2247	-0.0225	0.707189
glucuronate	0.0306615	0.1396	0.0265	0.707898
3-methylglutaconate	0.0341323	0.1359	0.0263	0.712507
trans-4-hydroxyproline	0.738776	0.022	-0.0254	0.719387
hypoxanthine	0.767933	-0.02	0.0257	0.719798
N-methyl-GABA	0.112248	0.097	0.0226	0.728028
dopamine 4-sulfate	0.862868	-0.0084	-0.0174	0.730224
N6-methyllysine	0.919382	-0.0069	-0.0245	0.731942
1-methylnicotinamide	0.423356	-0.0551	-0.024	0.733041
N-acetyl-aspartyl-glutamate (NAAG)	0.869605	-0.0102	0.0223	0.733695
N-acetyl-2-aminooctanoate*	0.104011	-0.1024	-0.0239	0.738999
glucuronide of C10H18O2 (7)*	0.0870914	0.1073	0.0205	0.740337
2S,3R-dihydroxybutyrate	0.495402	0.0408	-0.0196	0.750982
cysteine sulfinic acid	0.662585	0.0291	0.0218	0.761106
1-methyl-5-imidazolelactate	0.366461	0.0572	-0.0224	0.76352
dihomo-linolenoyl-choline	0.0576225	-0.1168	0.0214	0.764212
glycolithocholate sulfate*	0.360678	0.0606	0.0218	0.766094
pregnenediol sulfate (C21H34O5S)*	3.91e-06	-0.2553	-0.019	0.766884
glyco-beta-muricholate**	0.251546	0.0715	0.0197	0.768289
pyridoxate	0.235203	-0.0754	-0.0209	0.782862
caproate (6:0)	0.301434	-0.0684	0.0195	0.785335
4-guanidinobutanoate	0.0769503	-0.1092	0.0178	0.786029
N-palmitoyl-heptadecasphingosine (d17:1/16:0)*	0.461026	0.0476	-0.0182	0.792905
N,N-dimethyl-pro-pro	0.207312	-0.0724	0.0162	0.796061
pyridoxal	0.0416024	-0.137	0.0185	0.798633
sphingomyelin (d18:2/21:0, d16:2/23:0)*	0.0312552	-0.1212	-0.0154	0.800399
lyxonate	0.86268	-0.0118	-0.017	0.805186
alpha-hydroxyisocaproate	0.0016701	0.1869	-0.0165	0.807155
S-1-pyrroline-5-carboxylate	0.140372	-0.0999	0.0166	0.814274
behenoylcarnitine (C22)*	0.151196	-0.099	0.0156	0.818885
5-hydroxyhexanoate	0.873092	0.0105	0.0162	0.819978
dehydroepiandrosterone sulfate (DHEA-S)	0.0008332	-0.1983	0.0141	0.823192
prolylglycine	0.0020999	0.1988	0.0159	0.823361
3-methylcytidine	0.187227	0.085	0.0154	0.823919
cholesterol	0.984605	0.0013	-0.0147	0.824076
inosine	0.485494	-0.0472	0.0154	0.824203
2-hydroxy-4-(methylthio)butanoic acid	0.0012527	0.2041	-0.0137	0.842162
1-arachidonoyl-GPE (20:4n6)*	0.331206	0.064	0.0141	0.846976
heme	0.0012827	0.2084	0.0139	0.847949
glycocholate	0.0070603	0.1783	0.0139	0.848561
glycerol 3-phosphate	0.77712	0.0194	-0.0134	0.84889
indoleacetate	0.423825	-0.0517	-0.0136	0.855044
N-acetylarginine	0.0215206	0.1538	0.0125	0.859986
2-hydroxyoctanoate	0.630509	-0.0292	-0.0138	0.860421
1-linoleoyl-GPI (18:2)*	0.865918	-0.0115	0.0116	0.869887
5alpha-pregnan-3beta,20beta-diol monosulfate (1)	0.0493982	-0.1172	0.0122	0.870397
acetylcarnitine (C2)	0.354254	-0.0596	-0.0117	0.870886
androsterone sulfate	0.0057869	-0.1715	-0.011	0.870943
glycoursodeoxycholate	0.0268638	0.1452	0.0113	0.875079
1-stearoyl-2-docosahexaenoyl-GPC (18:0/22:6)	0.0040215	0.1822	-0.0097	0.88983
glycochenodeoxycholate	0.0311528	0.1332	0.0089	0.891469
vanillylmandelate (VMA)	0.633399	-0.0299	0.0088	0.891741
myristoyl dihydrosphingomyelin (d18:0/14:0)*	0.0043379	-0.1866	-0.0078	0.908423
sphinganine-1-phosphate	0.87752	0.0101	0.0074	0.91695
phenylacetylglutamate	0.481033	0.0424	0.0056	0.933221
N-methylhydroxyproline**	0.673441	0.0267	0.0057	0.93715
3-methoxytyramine sulfate	0.381576	-0.045	-0.0042	0.940736
3-phosphoglycerate	0.0781462	0.1168	0.0051	0.943467
taurochenodeoxycholate	0.0632241	0.1235	-0.0048	0.947218
indolelactate	0.0569714	0.114	0.0037	0.954373
N-acetyltaurine	0.795055	-0.0172	0.0035	0.958106
N-acetylhomocitrulline	0.162492	0.0823	0.0032	0.960938
sphingosine 1-phosphate	0.153707	-0.0953	0.0034	0.961851
(S)-3-hydroxybutyrylcarnitine	0.512216	-0.0422	-0.0026	0.97173
suberoylcarnitine (C8-DC)	0.0285629	-0.137	0.0017	0.980638
tyramine O-sulfate	0.325494	0.0602	0.0014	0.982467
palmitate (16:0)	0.187889	0.0879	0.0014	0.984082
3-amino-2-piperidone	0.344741	-0.0603	0.0004	0.99567
