# Supplementary material for: Extensive transcriptome sex-reversal later in life, after developmental low-dose bisphenol A exposure
Source: Research Square preprint supplement (doi:10.21203/rs.3.rs-2977026/v1), 2023-07-06
Supplement: Supplementary file 3 [file c046955094c79cf32916c027.xlsx]

## Sheet: Control female vs Control male
Probe_ID	Female Control, FC (avg exp)	Male Control, MC (avg exp)	FC vs MC (fold change)	FC vs MC (adj p-value)	Gene Symbol	mRNA Accession
17601697	0.00381313	2.17686	-570.885	0.035007	---	---
17731267	0.00192691	0.754845	-391.739	0.000563918	snoRNA	ENSRNOT00000081366
17667996	0.0264971	0.721524	-27.2303	0.0351085	---	ENSRNOT00000085153
17603905	0.121478	1.81277	-14.9226	0.019093	---	---
17735454	0.0502371	0.744785	-14.8254	0.0470981	---	ENSRNOT00000086153
17800598	0.136192	1.10493	-8.11303	0.000691081	---	ENSRNOT00000080808
17849291	0.594716	3.04891	-5.12666	0.00191512	---	ENSRNOT00000091366
17882217	1.84874	9.26157	-5.00967	5.37551e-06	Eif2s3y	NM_001167666
17652674	0.572302	2.1791	-3.80761	0.00296773	---	ENSRNOT00000079591
17732252	0.50636	1.89604	-3.74445	0.0355087	---	---
17882215	3.52842	12.2092	-3.46025	1.09854e-07	Ddx3	NM_001167665
17723744	0.844598	2.41431	-2.85853	0.040911	---	---
17602597	1.10206	3.07453	-2.78979	0.0120538	---	---
17608191	1.07698	2.9201	-2.71137	0.0359679	---	---
17605203	1.17493	3.16377	-2.69272	0.00745515	---	---
17607585	1.23913	3.24108	-2.61561	0.0228375	---	---
17609003	1.23913	3.24108	-2.61561	0.0228375	---	---
17829982	1.09226	2.80187	-2.5652	0.0405064	---	ENSRNOT00000082395
17822173	0.428272	1.07207	-2.50325	0.0377563	---	ENSRNOT00000086614
17821556	0.737959	1.83198	-2.4825	0.0260138	---	ENSRNOT00000086139
17862123	0.941063	2.22082	-2.35991	0.0414114	---	---
17734970	2.20679	5.01299	-2.27163	0.0332723	---	---
17882901	2.20679	5.01299	-2.27163	0.0332723	---	---
17858087	1.06433	2.34856	-2.20662	0.00555544	---	ENSRNOT00000090443
17698547	1.24118	2.71862	-2.19035	0.000657161	---	---
17806163	1.55398	3.37157	-2.16964	0.0268956	---	ENSRNOT00000090806
17700580	1.06321	2.2702	-2.13522	0.00351875	---	ENSRNOT00000078293
17612426	1.24283	2.64978	-2.13205	0.0356999	---	GENSCAN00000035964
17778040	1.5946	3.37653	-2.11747	0.0465137	---	GENSCAN00000028817
17720295	1.4928	3.15342	-2.11243	0.040499	---	---
17700466	1.05021	2.18728	-2.08271	0.0461222	---	ENSRNOT00000088912
17607221	1.34097	2.77578	-2.06999	0.010046	---	---
17850830	2.09456	4.32143	-2.06317	0.0275392	---	---
17834483	1.54155	3.17483	-2.05951	0.00397985	LOC103692807	XR_593336
17638072	1.16272	2.38357	-2.04999	0.0344296	Mir202	NR_032736
17711284	1.48425	2.95527	-1.99108	0.0103114	---	ENSRNOT00000070760
17606583	1.14686	2.26027	-1.97083	0.0295918	---	---
17729187	1.54331	3.02783	-1.9619	0.00748787	---	ENSRNOT00000070373
17664440	1.47866	2.88947	-1.95412	0.0123157	---	---
17664252	0.887263	1.69293	-1.90804	0.0116934	---	---
17795345	1.2676	2.39586	-1.89007	0.0201007	---	ENSRNOT00000029183
17780194	0.698411	1.29653	-1.8564	0.024378	---	ENSRNOT00000090607
17638285	1.4039	2.59044	-1.84517	0.0111756	---	ENSRNOT00000080861
17730274	1.35807	2.49604	-1.83793	0.0446438	---	ENSRNOT00000091256
17736710	0.958097	1.69241	-1.76643	0.0342824	---	ENSRNOT00000082727
17791787	1.07385	1.88545	-1.75578	0.0295261	---	ENSRNOT00000082546
17843085	2.16761	3.74837	-1.72926	0.0322288	---	ENSRNOT00000078324
17607029	1.34448	2.31632	-1.72284	0.0275793	---	---
17876040	1.45771	2.4977	-1.71344	0.0193912	---	ENSRNOT00000090349
17825417	2.07721	3.47814	-1.67443	0.00807981	---	ENSRNOT00000078691
17785904	2.17009	3.54261	-1.63247	0.00920063	---	---
17791727	2.3936	3.88982	-1.62509	0.0102625	---	ENSRNOT00000080282
17607015	2.36013	3.82346	-1.62002	0.0492952	---	---
17829843	1.99628	3.19958	-1.60277	0.0496603	---	---
17629072	2.10486	3.33901	-1.58633	0.020953	---	ENSRNOT00000033187
17808229	1.34508	2.13316	-1.5859	0.00133596	---	---
17841800	1.5717	2.47755	-1.57635	0.018195	---	ENSRNOT00000086369
17822668	2.64803	4.13036	-1.55979	0.0358567	---	NONRATT048284
17814060	2.15544	3.36134	-1.55947	0.0316235	---	GENSCAN00000041783
17802718	2.60468	4.04047	-1.55123	0.00613547	Trnp1	XM_001069068
17685893	2.5545	3.956	-1.54864	0.00769178	---	ENSRNOT00000063325
17881739	2.59473	3.94925	-1.52203	0.00386158	---	---
17792083	2.44916	3.71313	-1.51608	0.00966587	---	GENSCAN00000052033
17846821	2.60412	3.93851	-1.51242	0.0210927	---	ENSRNOT00000091673
17778060	2.06704	3.10878	-1.50397	0.0227433	LOC689168	XM_003753802
17707807	1.95394	2.92301	-1.49596	0.00272551	---	---
17671409	2.38038	3.5512	-1.49186	0.0212076	---	---
17881681	3.5038	5.20838	-1.4865	0.0296484	---	GENSCAN00000003110
17837103	2.61222	3.87829	-1.48467	0.00738289	---	---
17634774	2.08345	3.08814	-1.48222	0.0217511	Olr27	NM_001000936
17843076	2.41052	3.55552	-1.475	0.0229769	Rup2	NM_001034950
17605419	2.05311	2.96693	-1.44509	0.0382755	---	---
17839815	1.28416	1.85484	-1.4444	0.0471868	---	---
17741514	1.72337	2.47463	-1.43593	0.0388495	---	---
17634814	1.52225	2.17904	-1.43146	0.0321092	---	---
17821139	2.42578	3.46537	-1.42856	0.0486825	---	GENSCAN00000058747
17824909	2.48357	3.54282	-1.4265	0.0449376	---	ENSRNOT00000073446
17704845	1.65489	2.3576	-1.42462	0.0354047	---	ENSRNOT00000088841
17872279	2.05488	2.92571	-1.42379	0.0348419	---	ENSRNOT00000088031
17665832	3.19812	4.54608	-1.42148	0.0202637	---	---
17702503	0.782044	1.10733	-1.41594	0.0388893	---	NONRATT020335
17881597	2.78876	3.93761	-1.41196	0.0317531	---	---
17791205	2.87348	4.04808	-1.40878	0.0265197	---	GENSCAN00000046122
17837483	3.14392	4.42794	-1.40842	0.0438689	---	ENSRNOT00000082952
17825003	3.6574	5.12891	-1.40234	0.0032646	Ighv12-3	ENSRNOT00000071577
17769299	3.28518	4.60496	-1.40174	0.0268156	Spo11	NM_001108964
17656089	3.04853	4.23886	-1.39046	0.0239412	---	---
17619058	3.12376	4.33544	-1.38789	0.00891695	---	ENSRNOT00000084931
17613818	3.0528	4.23332	-1.3867	0.0223928	Ceacam11	NM_001025404
17605345	2.66568	3.68908	-1.38392	0.0050099	---	---
17824346	3.14291	4.32474	-1.37603	0.0322751	Mir3592	NR_037393
17646209	2.93537	4.03198	-1.37358	0.00188496	---	GENSCAN00000031738
17607021	3.11355	4.25737	-1.36737	0.0444493	---	---
17682285	2.94744	4.02935	-1.36707	0.0427969	Olr1602	NM_001000909
17832371	3.68206	5.01747	-1.36268	0.0431767	---	---
17842245	2.51193	3.42066	-1.36177	0.0254965	Olr1160	NM_001000985
17839704	2.81639	3.83517	-1.36173	0.0179885	Mir1249	NR_037390
17681075	2.53491	3.44635	-1.35956	0.0416886	---	---
17656473	2.26776	3.07626	-1.35652	0.0128069	Olr1422	NM_001000007
17881269	2.90259	3.93592	-1.356	0.00776041	---	RPTR-K01486-1
17679275	2.7063	3.666	-1.35462	0.0169161	---	ENSRNOT00000090135
17683397	1.58981	2.15063	-1.35276	0.0344947	---	ENSRNOT00000091118
17664542	3.00775	4.06509	-1.35154	0.00718718	---	---
17668365	2.94295	3.97008	-1.34901	0.00152144	---	GENSCAN00000038824
17865430	2.90819	3.91226	-1.34526	0.00162173	---	---
17604555	3.24342	4.33491	-1.33653	0.0275478	---	---
17755934	3.39285	4.52563	-1.33387	0.0116361	Olr1693	NM_001000557
17787021	2.25779	3.00581	-1.33131	0.0119246	Vom2r50	NM_001099507
17882675	4.23672	5.63141	-1.32919	8.40608e-05	Sry	NM_012772
17789919	2.44652	3.24921	-1.32809	0.0443963	---	---
17832714	2.83048	3.75861	-1.3279	0.0399632	Hoxc10	NM_001308636
17640636	3.31548	4.40127	-1.32749	0.0124742	Ms4a18	XM_008760254
17688569	2.76298	3.66277	-1.32566	0.00309941	Gk2	NM_001004077
17711906	2.12885	2.81871	-1.32405	0.0196331	---	---
17792853	2.29483	3.03422	-1.3222	0.0243374	---	ENSRNOT00000032477
17812310	3.03327	3.99914	-1.31843	0.00492965	RGD1559644	XM_001074380
17851361	2.65011	3.49035	-1.31706	0.0317243	Olr1331	NM_001000790
17774124	3.03989	3.99985	-1.31579	0.00316854	Olr484	NM_001000306
17817740	2.72337	3.57685	-1.31339	0.0289678	---	ENSRNOT00000053416
17680226	3.81794	5.00602	-1.31118	0.00128389	Fmod	NM_080698
17790891	3.4128	4.46562	-1.30849	0.0144348	Prss37	NM_001108625
17715136	3.24405	4.23259	-1.30472	0.00463323	LOC690971	XM_008771589
17624347	2.99872	3.90218	-1.30128	0.0054775	Olr365	NM_001001046
17850955	3.04833	3.96546	-1.30086	0.0479225	---	ENSRNOT00000078025
17609891	3.8744	5.03526	-1.29962	0.0313473	---	---
17633277	3.60782	4.68863	-1.29958	0.0193995	Mrgprb3	XM_001077174
17834598	3.49921	4.54197	-1.298	0.00387282	Rfx4	XM_006241183
17880162	3.18849	4.13709	-1.29751	0.0101557	---	GENSCAN00000000790
17763595	2.48724	3.2241	-1.29625	0.0133573	Olr468	NM_001001124
17745990	3.35929	4.35024	-1.29499	0.0122555	Cdh6	NM_012927
17602021	3.14751	4.07001	-1.29309	0.00380199	---	---
17860801	2.07927	2.68564	-1.29162	0.0212273	---	---
17726740	2.92575	3.77497	-1.29026	0.00456666	---	---
17725167	2.64472	3.40106	-1.28598	0.0335005	---	---
17717763	2.91744	3.75151	-1.28589	0.0205554	Spata31a5	NM_001008359
17741855	2.50568	3.21807	-1.28431	0.0225294	---	ENSRNOT00000083725
17724649	2.45227	3.14869	-1.28399	0.0422049	---	ENSRNOT00000091700
17839733	3.67221	4.7133	-1.2835	0.00439117	---	ENSRNOT00000078815
17796169	3.18017	4.07922	-1.28271	0.0136581	---	NONRATT042382
17711255	2.14484	2.74987	-1.28208	0.0312603	---	ENSRNOT00000090257
17723948	2.41662	3.09777	-1.28186	0.044639	---	---
17690859	2.54425	3.25403	-1.27898	0.0157203	---	ENSRNOT00000089647
17726532	3.55171	4.54107	-1.27856	0.0327202	Mir378	NR_032139
17774120	3.5577	4.54666	-1.27798	0.00876961	Olr482	NM_001000561
17607905	3.56778	4.55351	-1.27629	0.0158333	---	---
17706458	2.92124	3.72129	-1.27387	0.0490316	Rbp3	NM_001191832
17713941	3.35754	4.27468	-1.27316	0.0182909	Ctsr	NM_175581
17863213	4.09046	5.20706	-1.27298	0.0231647	Crisp4	NM_001039393
17880340	3.12328	3.97398	-1.27237	0.00630088	---	GENSCAN00000049630
17698466	2.31506	2.94444	-1.27186	0.0255221	---	GENSCAN00000019573
17743909	3.15814	4.01455	-1.27118	0.0130468	---	ENSRNOT00000085820
17612607	2.63571	3.34803	-1.27026	0.0299117	Vom2r19	NM_001099492
17725233	3.44169	4.3681	-1.26917	0.0266836	---	GENSCAN00000034589
17680719	2.93984	3.72648	-1.26758	0.042154	---	ENSRNOT00000082431
17842211	3.08741	3.91249	-1.26724	0.0258505	Olr1124	NM_001000426
17715140	3.44431	4.36467	-1.26721	0.0201638	---	ENSRNOT00000079635
17819325	4.20345	5.32648	-1.26717	0.0205981	LOC501426	XM_008758194
17883666	2.68467	3.40177	-1.26711	0.0441979	---	---
17730310	3.69083	4.67475	-1.26659	0.0394915	Cntnap4	NM_001107432
17883207	5.05292	6.39885	-1.26637	0.0202236	---	ENSRNOT00000051008
17859208	2.9128	3.6826	-1.26428	0.0460523	---	ENSRNOT00000087343
17867621	3.35253	4.23694	-1.2638	0.0202656	Cyp2c13	NM_138514
17735918	3.00977	3.79312	-1.26027	0.0150455	---	ENSRNOT00000069349
17876562	3.03936	3.82823	-1.25955	0.0447931	---	---
17641707	2.458	3.09096	-1.25751	0.039951	---	ENSRNOT00000089137
17825916	3.3419	4.19983	-1.25672	0.0355764	---	NM_001001365
17689669	3.88981	4.88242	-1.25518	0.039206	Gabra2	NM_001135779
17841124	2.70014	3.38496	-1.25362	0.0411859	---	ENSRNOT00000080558
17722813	3.50081	4.38226	-1.25179	0.0348839	Pabpc2	NM_001106151
17878331	2.41641	3.02354	-1.25125	0.0396259	Mir384	NR_032273
17605379	3.59499	4.49704	-1.25092	0.0457015	---	---
17880833	3.57912	4.47545	-1.25043	0.0110951	---	---
17774285	2.78624	3.48324	-1.25016	0.0313347	Olr658	NM_001000344
17685123	2.72612	3.40446	-1.24883	0.0490187	---	ENSRNOT00000091631
17760437	3.67061	4.58221	-1.24835	0.0376292	Dbh	NM_013158
17601643	5.02731	6.27205	-1.2476	0.0359377	---	---
17760219	3.27104	4.07408	-1.2455	0.00867329	LOC102547882	XM_008761630
17715704	3.76125	4.67857	-1.24389	0.0285435	Slc17a4	NM_001271214
17645358	3.96272	4.92345	-1.24244	0.0398152	Olr1398	NM_001000002
17763749	3.16114	3.92737	-1.24239	0.0485725	---	ENSRNOT00000064006
17755947	2.22999	2.76466	-1.23976	0.0114666	Olr1697	NM_001001111
17804303	4.63023	5.73604	-1.23883	0.000637932	---	ENSRNOT00000070328
17883776	3.2987	4.08473	-1.23829	0.0343263	---	---
17817308	3.20575	3.9689	-1.23806	0.0230408	Acot1	NM_031315
17790377	3.65173	4.51782	-1.23718	0.0434471	Tsga13	NM_001107851
17833256	4.05638	5.0163	-1.23664	0.0436499	---	NM_001001364
17673477	3.79902	4.69497	-1.23584	0.00759161	---	ENSRNOT00000048690
17694311	4.17546	5.15815	-1.23535	0.0407671	Grxcr1	NM_001191935
17835369	2.93	3.61533	-1.2339	0.04062	---	ENSRNOT00000083789
17680042	2.73626	3.37532	-1.23355	0.00234207	Mir135b	NR_031797
17791862	3.38913	4.17631	-1.23227	0.0342455	---	ENSRNOT00000011067
17848713	3.94448	4.85878	-1.23179	0.045567	Dlec1	XM_006226610
17666502	2.56293	3.15648	-1.23159	0.0490611	---	GENSCAN00000035165
17608539	2.92556	3.60024	-1.23061	0.0478819	---	---
17778304	3.58538	4.39691	-1.22634	0.0488582	Nrsn2	NM_001109561
17606963	3.1105	3.81398	-1.22616	0.0208125	---	---
17821079	4.17797	5.12148	-1.22583	0.043422	Vsnl1	NM_012686
17880646	3.68944	4.52053	-1.22526	0.0156392	Olfr1055	XM_002729195
17829231	3.03265	3.70907	-1.22305	0.0384123	---	ENSRNOT00000084479
17797445	4.12636	5.04572	-1.2228	0.00943238	Cngb3	NM_001271238
17600627	3.49752	4.27649	-1.22272	0.00153364	---	---
17610141	3.49752	4.27649	-1.22272	0.00153364	---	---
17602041	4.28857	5.23201	-1.21999	0.0170751	---	---
17726649	3.36431	4.09717	-1.21783	0.0182068	Spink13	NM_001109539
17863238	3.68713	4.48289	-1.21582	0.0234281	---	ENSRNOT00000078679
17827534	3.27797	3.98518	-1.21575	0.0216446	---	GENSCAN00000017160
17600775	4.60324	5.59278	-1.21497	0.0405768	---	---
17883033	3.3336	4.04845	-1.21444	0.00294346	---	---
17783396	2.08762	2.53331	-1.21349	0.0358357	---	NONRATT039570
17673406	3.9584	4.80058	-1.21276	0.0332709	LOC689271	XM_001070212
17616100	3.43522	4.1651	-1.21247	0.00461367	Izumo2	XM_006223266
17759430	3.69701	4.47995	-1.21178	0.00547594	---	GENSCAN00000024724
17818649	2.19725	2.65855	-1.20995	0.0376405	Mir411	NR_032275
17698709	3.44688	4.16949	-1.20964	0.0433334	---	ENSRNOT00000068212
17880511	3.31892	4.01265	-1.20902	0.0176134	---	---
17818495	4.17207	5.04206	-1.20853	0.0247243	---	Bsr
17762493	4.00464	4.83345	-1.20696	0.0295237	---	ENSRNOT00000058819
17824501	3.24878	3.91994	-1.20659	0.0115699	Mir3545	NR_037319
17817627	3.33169	4.01385	-1.20475	0.0206428	Lrrc74a	NM_001037783
17604931	5.01158	6.03089	-1.20339	0.00479918	---	---
17883744	3.62452	4.35817	-1.20241	0.0337378	---	---
17826858	3.31305	3.98014	-1.20135	0.00866469	---	---
17720160	3.82698	4.59466	-1.2006	0.0214447	---	---
17774350	3.40235	4.08276	-1.19998	0.0391933	Olr707	NM_001001065
17787545	3.95956	4.75049	-1.19975	0.0317425	Klrb1	NM_001085405
17867336	5.25079	6.29951	-1.19973	0.00346068	---	ENSRNOT00000049806
17820101	3.17306	3.80612	-1.19951	0.0309556	---	ENSRNOT00000089684
17808964	2.53202	3.03444	-1.19843	0.00819845	---	---
17637879	3.03439	3.63593	-1.19824	0.0461861	LOC100302465	NM_001163214
17883113	3.16138	3.78781	-1.19815	0.0408903	---	---
17660840	3.06084	3.66525	-1.19746	0.0062954	---	---
17628980	3.39479	4.06448	-1.19727	0.037262	Mir3596c	NR_037379
17801876	3.43464	4.11148	-1.19706	0.0175848	LOC102547626	XM_008764119
17774890	5.50706	6.59208	-1.19702	0.0384401	Rag1	NM_053468
17668584	2.66389	3.18582	-1.19593	0.0385916	---	ENSRNOT00000088826
17663077	3.8731	4.63006	-1.19544	0.0172618	Cd300ld	XM_002727841
17635628	4.17278	4.98346	-1.19428	0.000226469	Hbe2	NM_001024805
17846131	3.12834	3.73437	-1.19372	0.0220664	Gsta5	NM_001010921
17608407	3.81973	4.5565	-1.19289	0.0335505	---	---
17672498	3.48145	4.15074	-1.19225	0.0373773	---	GENSCAN00000016863
17763691	3.96811	4.73055	-1.19214	0.0416394	Olr595	NM_001006596
17683399	3.20667	3.81734	-1.19044	0.0110069	---	---
17633915	4.35039	5.17879	-1.19042	0.00527148	---	---
17872106	3.76468	4.47922	-1.1898	0.0420441	Egfl6	NM_001108254
17753995	3.98779	4.74376	-1.18957	0.00249001	Pde9a	NM_138543
17775480	5.75098	6.83352	-1.18823	0.0160519	Grem1	NM_019282
17696867	2.82589	3.35525	-1.18733	0.0100346	---	---
17667230	4.02987	4.773	-1.1844	0.0297956	Ccdc116	NM_001024740
17822731	2.94564	3.48843	-1.18427	0.0235838	RGD1562381	XM_001080819
17785381	4.03524	4.7758	-1.18352	0.0199262	Vom1r92	NM_001008968
17606377	3.75944	4.449	-1.18342	0.0348679	---	---
17605937	4.49224	5.31342	-1.1828	0.0371866	---	---
17665501	2.52444	2.98571	-1.18272	0.00735662	---	ENSRNOT00000084679
17608147	3.52389	4.16584	-1.18217	0.0252722	---	---
17811325	4.49992	5.30979	-1.17997	0.0484804	Catsper4	XM_002726602
17772686	4.22491	4.97933	-1.17856	0.0431876	Gcg	NM_012707
17749082	3.30999	3.89696	-1.17733	0.0339985	---	GENSCAN00000030925
17712224	4.20407	4.94477	-1.17619	0.0148131	Chrnb3	NM_133597
17711322	3.89178	4.57745	-1.17618	0.0317763	Spock3	NM_001107310
17747317	3.16822	3.71896	-1.17383	0.000635451	---	---
17608365	3.83974	4.50505	-1.17327	0.0490526	---	---
17686071	4.83992	5.67635	-1.17282	0.00809755	Fmo3	NM_053433
17790133	3.84317	4.49912	-1.17068	0.0405128	Pax4	NM_031799
17727441	4.16878	4.87937	-1.17046	0.0191599	LOC100359752	XM_008772227
17633541	3.27416	3.82793	-1.16913	0.00136705	---	ENSRNOT00000083021
17651704	3.74022	4.36879	-1.16806	0.0400289	Crhr1	NM_001301812
17690266	3.58002	4.18029	-1.16767	0.0164707	---	ENSRNOT00000078406
17828757	4.35839	5.0866	-1.16708	0.00076126	Rdh16	NM_199208
17609259	3.83404	4.47322	-1.16671	0.0295054	---	---
17658824	3.3339	3.88488	-1.16526	0.0470423	---	ENSRNOT00000074979
17883704	3.85635	4.49356	-1.16524	0.0151613	---	---
17666905	4.21703	4.91081	-1.16452	0.00766319	Olr1568	NM_001000532
17721729	3.32555	3.87249	-1.16446	0.00263138	---	GENSCAN00000055218
17878279	4.87931	5.68098	-1.1643	0.0470803	---	ENSRNOT00000083986
17667285	5.47737	6.37641	-1.16414	0.0300512	Igll1	NM_001190341
17814793	3.01295	3.50716	-1.16403	0.0215652	---	ENSRNOT00000080164
17842716	4.22866	4.9206	-1.16363	0.0499183	Npsr1	NM_001106808
17653930	4.03666	4.69404	-1.16285	0.0196055	LOC100361104	XM_002727701
17618226	4.02798	4.6821	-1.16239	0.00023922	Ccdc89	NM_001134833
17670582	2.24262	2.60491	-1.16155	0.0163866	---	ENSRNOT00000082068
17627794	4.34894	5.05087	-1.1614	0.0443473	Slc2a12	NM_001107451
17629015	3.59701	4.17464	-1.16058	0.036353	Vom1r15	NM_001008960
17814005	2.68363	3.11323	-1.16008	0.043379	---	ENSRNOT00000072498
17607075	3.48561	4.04312	-1.15994	0.0215456	---	---
17851258	3.49173	4.04897	-1.15959	0.0110812	Olr1291	NM_001000797
17670072	3.80985	4.41685	-1.15932	0.0373049	---	---
17841977	4.20767	4.87786	-1.15928	0.0439437	Pgr	NM_022847
17792028	3.76976	4.37008	-1.15925	0.0251448	---	GENSCAN00000018492
17754036	3.27951	3.80156	-1.15918	0.0378049	---	ENSRNOT00000063363
17848996	4.09617	4.74263	-1.15782	0.0397073	Cyp8b1	NM_031241
17796966	4.72898	5.47496	-1.15775	0.00632791	Sntg1	NM_001191981
17772639	3.96775	4.5936	-1.15773	0.0300703	Tbr1	NM_001191070
17666434	3.72886	4.31682	-1.15768	0.0476952	---	ENSRNOT00000054450
17711987	4.12049	4.77	-1.15763	0.0363863	Adam24	XM_008771287
17725423	3.75825	4.35019	-1.1575	0.00512647	LOC103694185	XM_008772053
17883197	5.92117	6.84872	-1.15665	0.00880165	---	ENSRNOT00000049806
17830364	2.68299	3.09957	-1.15527	0.0464107	---	ENSRNOT00000078365
17880503	4.11946	4.75636	-1.15461	0.0179808	RGD1564313	XM_003749331
17711799	5.35875	6.18605	-1.15438	0.0013572	Sorbs2	NM_053770
17604843	3.69763	4.2655	-1.15357	0.0372412	---	---
17713681	4.20734	4.85231	-1.15329	0.0252021	---	---
17881543	4.87442	5.62149	-1.15326	0.0321821	---	---
17700729	4.5842	5.28586	-1.15306	0.0184766	---	GENSCAN00000010074
17629939	3.59048	4.13836	-1.15259	0.0492701	---	ENSRNOT00000046600
17835177	4.47463	5.15339	-1.15169	0.0353381	Cfap54	XM_006241270
17763684	3.26774	3.76319	-1.15162	0.034389	Olr590	NM_001000658
17842288	3.0684	3.52833	-1.14989	0.0452607	---	ENSRNOT00000080906
17806773	3.67756	4.22495	-1.14885	0.0381776	---	---
17625587	6.19453	7.11387	-1.14841	0.00244059	Dntt	NM_001012461
17676538	4.01501	4.61036	-1.14828	0.0119087	Mir25	NR_031829
17746026	4.1625	4.77915	-1.14814	0.00722862	LOC310177	ENSRNOT00000030328
17646726	3.91786	4.49577	-1.14751	0.0172208	Trim16	NM_001135033
17868867	3.84306	4.40981	-1.14747	0.00260007	LOC291863	NM_001013889
17624959	4.46922	5.12294	-1.14627	0.00251637	Eef1b2l	ENSRNOT00000047024
17730701	4.36186	4.99522	-1.14521	0.00482215	Mir3564	NR_037347
17868049	4.08778	4.68048	-1.14499	0.0447915	---	---
17648339	4.48833	5.13393	-1.14384	0.0112213	---	GENSCAN00000044780
17826881	3.45363	3.94855	-1.1433	0.0116342	Vom2r55	NM_001099495
17815584	3.67384	4.19932	-1.14303	0.0408673	LOC680646	ENSRNOT00000036337
17757810	6.21783	7.1051	-1.1427	0.0214695	Vpreb3	NM_001108930
17766650	4.16873	4.76251	-1.14244	0.0295417	---	ENSRNOT00000080505
17790359	5.04688	5.76457	-1.1422	0.0306085	---	NONRATT056080
17807281	4.49705	5.13646	-1.14219	0.0136737	---	ENSRNOT00000082381
17838637	3.97907	4.54414	-1.14201	0.0241383	Scrt1	NM_001130570
17642793	3.99433	4.56104	-1.14188	0.0245892	---	ENSRNOT00000079294
17642795	3.99433	4.56104	-1.14188	0.0245892	---	ENSRNOT00000079294
17723396	4.52372	5.1639	-1.14152	0.0455382	Ctxn3	NM_001134696
17601001	5.87293	6.70154	-1.14109	0.0107064	---	---
17601335	5.87293	6.70154	-1.14109	0.0107064	---	---
17683532	3.70379	4.22617	-1.14104	0.0496004	---	ENSRNOT00000089317
17843069	4.75437	5.4219	-1.1404	0.00559577	LOC100360143	XM_002729890
17603153	5.08593	5.79631	-1.13967	0.00599502	---	---
17722284	4.69397	5.34806	-1.13935	0.0290757	Pkd2l2	NM_001106156
17653713	4.02461	4.58333	-1.13883	0.00739991	Atf7ip2	NM_001017471
17774078	4.19927	4.77744	-1.13768	0.0211731	Olr439	NM_001000281
17737318	3.83852	4.36294	-1.13662	0.03362	LOC103691513	XR_590990
17774276	4.18292	4.75159	-1.13595	0.0190953	Olr654	NM_001000636
17605747	4.18869	4.7563	-1.13551	0.0387257	---	---
17880669	4.34992	4.9365	-1.13485	0.0198052	---	GENSCAN00000033039
17841793	4.03352	4.57591	-1.13447	0.0235614	---	---
17633331	4.01374	4.55204	-1.13412	0.00733219	---	---
17677137	4.28189	4.85551	-1.13396	0.0429083	Caln1	NM_001077201
17850647	4.81108	5.45243	-1.13331	0.0204397	Glb1l2	NM_001192018
17682486	4.87767	5.52741	-1.13321	0.00140349	---	---
17746432	3.31912	3.75986	-1.13279	0.0185548	---	GENSCAN00000050470
17742515	3.01524	3.41537	-1.1327	0.0459267	---	ENSRNOT00000087258
17697386	4.62472	5.23765	-1.13253	0.0155593	---	---
17634922	4.38065	4.96121	-1.13253	0.00379009	---	---
17707752	4.43373	5.01913	-1.13203	0.00682207	---	---
17880991	6.00927	6.80107	-1.13176	0.0248132	---	GENSCAN00000042901
17761767	3.99822	4.52371	-1.13143	0.0438915	Olr402	NM_001001014
17774270	4.54129	5.13632	-1.13103	0.0455352	Olr650	NM_001000639
17790412	4.48169	5.06857	-1.13095	0.00972467	---	---
17617825	4.56385	5.16028	-1.13069	0.021791	---	---
17671298	4.34666	4.91402	-1.13053	0.0398529	Pcp2	NM_001107116
17724523	4.4016	4.97432	-1.13012	0.0489494	LOC102553808	XR_342049
17874533	4.3718	4.93987	-1.12994	0.03607	---	---
17850594	4.65466	5.25623	-1.12924	0.0121404	Dpy19l2	XM_002727030
17860307	4.48226	5.06069	-1.12905	0.0185857	LOC102548134	XR_349134
17811108	3.5792	4.04086	-1.12898	0.0398593	Fam46b	NM_001107907
17781280	3.99155	4.50438	-1.12848	0.0250909	LOC103692071	XM_008762749
17749142	4.56757	5.15318	-1.12821	0.0131206	---	GENSCAN00000033305
17810192	4.17382	4.70688	-1.12772	0.0468768	Mir30c1	NR_031839
17619421	5.02126	5.6607	-1.12735	0.047945	Olr264	NM_001000999
17715566	3.00193	3.38365	-1.12716	0.0487632	Prl8a3	NM_020079
17619104	3.84668	4.33575	-1.12714	0.0437495	Olr103	NM_001000144
17609783	4.94145	5.56748	-1.12669	0.0318316	---	---
17736428	5.57752	6.28405	-1.12667	0.0314533	Capsl	NM_001106417
17720770	4.73294	5.3313	-1.12642	0.0459952	Ccdc3	XM_001071191
17810051	3.92264	4.41634	-1.12586	0.0243512	LOC679803	XM_006225522
17702546	5.04608	5.67004	-1.12365	0.0305908	---	---
17701379	3.96696	4.45716	-1.12357	0.0491462	---	ENSRNOT00000079748
17883111	3.73095	4.18912	-1.1228	0.0467933	---	---
17774340	4.96519	5.5745	-1.12272	0.0421302	Olr701	NM_001000627
17659942	4.35527	4.88908	-1.12257	0.0453717	Nog	NM_012990
17769349	2.81324	3.15739	-1.12233	0.0229573	---	ENSRNOT00000083648
17603681	5.05822	5.67617	-1.12217	0.038334	---	---
17792360	4.47473	5.02001	-1.12186	0.0224623	Dnah6	XM_008763013
17797988	3.68618	4.13406	-1.1215	0.0132587	RGD1306195	NM_001014062
17610371	6.2352	6.99111	-1.12123	0.00426801	Vom2r-ps10	XR_589890
17723509	3.99132	4.47366	-1.12085	0.0375192	---	---
17731112	4.53439	5.08228	-1.12083	0.0221952	---	GENSCAN00000035115
17657359	3.87706	4.34549	-1.12082	0.00462759	Usp43	NM_001126303
17858653	3.63929	4.07799	-1.12055	0.0232724	---	---
17601729	4.19367	4.69722	-1.12007	0.0079815	---	---
17707766	4.63158	5.18721	-1.11996	0.0464252	---	---
17880277	3.96263	4.43514	-1.11924	0.03497	---	GENSCAN00000042602
17686188	4.35437	4.87307	-1.11912	0.014825	Tbx19	NM_001107193
17625472	4.41052	4.93538	-1.119	0.0058888	---	ENSRNOT00000084334
17870082	5.72085	6.40071	-1.11884	0.0186659	LOC103690786	XR_589624
17809197	3.10934	3.47798	-1.11856	0.0385865	---	ENSRNOT00000083721
17781614	4.8516	5.4251	-1.11821	0.0052885	Tas2r7l	NM_001024319
17636351	4.24116	4.74196	-1.11808	0.037029	Pth	NM_017044
17757392	5.15147	5.75283	-1.11674	0.00391516	---	ENSRNOT00000085192
17883720	5.27303	5.88756	-1.11654	0.0485905	---	---
17846023	5.31093	5.92951	-1.11647	0.0479328	Bmp5	NM_001108168
17612972	4.61025	5.14704	-1.11643	0.0446967	---	ENSRNOT00000053809
17629648	4.61025	5.14704	-1.11643	0.0446967	---	ENSRNOT00000053809
17825907	4.76324	5.3175	-1.11636	0.0157002	Olr1012	NM_001000071
17619214	4.64551	5.1841	-1.11594	0.0202764	Olr199	NM_001001034
17883534	4.38827	4.89673	-1.11587	0.035123	---	---
17880744	4.8967	5.46237	-1.11552	0.0431821	Rnf223	XM_003750095
17634147	5.05479	5.63651	-1.11508	0.0491029	Rhcg	NM_183053
17806400	4.23825	4.72579	-1.11503	0.0335054	---	---
17803181	5.87634	6.55214	-1.115	0.0143123	Wnt4	ENSRNOT00000081893
17630983	4.61925	5.14776	-1.11442	0.0420892	Zfp780b-ps1	XM_008759212
17679724	4.34365	4.83897	-1.11403	0.0321989	Gpr39	NM_001100943
17786453	3.94567	4.39374	-1.11356	0.0210051	Olr829	NM_001000901
17796002	6.11358	6.80698	-1.11342	0.0487517	Eps8	XM_001072957
17822220	4.03571	4.49103	-1.11282	0.0347207	Mdga2	NM_199269
17880542	5.31887	5.91875	-1.11278	0.0468768	LOC100363449	XM_008761278
17692643	3.94914	4.39255	-1.11228	0.0405654	Ephx4	NM_001105994
17785391	3.82157	4.25016	-1.11215	0.000219998	Vom1r97	NM_173297
17681807	4.66749	5.19087	-1.11213	0.00782162	---	ENSRNOT00000048823
17635588	4.44675	4.94451	-1.11194	0.0385425	Olr121	NM_001000155
17755203	6.43639	7.14892	-1.1107	0.0130139	Pkib	NM_001076553
17611240	3.58657	3.9819	-1.11023	0.00350258	---	---
17610855	4.22819	4.68999	-1.10922	0.0227798	---	ENSRNOT00000087422
17656477	3.2992	3.65944	-1.10919	0.00725517	Olr1424	NM_001000779
17814554	4.28885	4.75583	-1.10888	0.0130005	---	---
17755904	4.48501	4.96998	-1.10813	0.0387249	Olr1671	NM_001000266
17704187	5.35005	5.92405	-1.10729	0.0468374	Synb	NM_001024239
17841427	5.71479	6.32362	-1.10654	0.0199373	Krt4	NM_001008806
17690395	4.69929	5.19815	-1.10616	0.0245753	RGD1565560	XM_001060544
17724160	4.54072	5.01955	-1.10545	0.0342101	---	GENSCAN00000034789
17609597	5.44101	6.01212	-1.10496	0.00642573	---	---
17626888	4.73007	5.22593	-1.10483	0.0312547	---	ENSRNOT00000084319
17695005	4.24228	4.68328	-1.10395	0.0416738	---	ENSRNOT00000089195
17841727	3.95169	4.3623	-1.10391	0.0472575	---	GENSCAN00000011455
17818445	4.77288	5.26876	-1.1039	0.00544601	---	ENSRNOT00000088384
17794674	3.85798	4.25519	-1.10296	0.0465941	Vom2r52	NM_001099503
17832113	5.48234	6.04231	-1.10214	0.000379461	Wnt1	NM_001105714
17617129	5.96412	6.57268	-1.10204	0.0249258	---	GENSCAN00000059392
17652357	3.74114	4.12261	-1.10197	0.0115724	Kcnj16	NM_053314
17781874	5.15422	5.6781	-1.10164	0.00809663	Hyal6	NM_001024320
17875942	3.76142	4.14196	-1.10117	0.00581394	---	GENSCAN00000045608
17812285	5.16792	5.68707	-1.10046	0.0111964	LOC691162	NM_001109629
17819328	6.19586	6.79985	-1.09748	0.048722	---	---
17823580	4.27178	4.68485	-1.0967	0.0132929	LOC500702	NM_001047960
17787132	3.59075	3.93737	-1.09653	0.0435669	---	---
17772833	4.70571	5.15837	-1.09619	0.0251712	Scn3a	NM_013119
17667280	4.65277	5.10008	-1.09614	0.0216667	---	NM_001108845
17723086	5.10662	5.59723	-1.09607	0.00124111	---	GENSCAN00000047321
17600639	5.26788	5.77332	-1.09595	0.00194951	---	---
17610153	5.26788	5.77332	-1.09595	0.00194951	---	---
17712710	5.26722	5.772	-1.09583	0.00593921	---	NM_001033074
17700192	4.40677	4.82779	-1.09554	0.0220366	Enox1	XM_008770070
17843379	4.6277	5.06669	-1.09486	0.026487	Olr1308	NM_001000795
17742987	5.03287	5.50902	-1.09461	0.0410478	LOC102555814	XM_006224273
17626033	4.80009	5.2525	-1.09425	0.0222286	Hps6	NM_181432
17709291	4.21758	4.60917	-1.09285	0.0378393	Adprhl1	XM_006253439
17610285	4.68865	5.12052	-1.09211	0.0105363	---	---
17851232	4.59646	5.01886	-1.0919	0.0208722	Olr1254	NM_001001085
17851407	5.00892	5.46833	-1.09172	0.0339359	---	---
17880483	4.9609	5.40923	-1.09037	0.0150634	---	GENSCAN00000046877
17818430	5.80515	6.32817	-1.0901	0.019333	Mir341	NR_031785
17619842	4.01555	4.3749	-1.08949	0.0222156	---	---
17646161	4.53176	4.9372	-1.08947	0.039613	LOC691277	NM_001109633
17635704	5.21558	5.68035	-1.08911	0.0227822	Olr156	NM_001006595
17804578	5.8679	6.38862	-1.08874	0.0457955	Gpr153	NM_001034855
17868030	6.04153	6.57713	-1.08865	0.0120564	---	---
17638634	5.48742	5.96803	-1.08758	0.0317246	Mir483	NR_032112
17882775	5.48742	5.96803	-1.08758	0.0317246	---	NR_032112
17748169	4.53788	4.93342	-1.08716	0.0471105	Gria2	NM_001083811
17610330	6.17502	6.70935	-1.08653	0.046157	Vom2r2	NM_001099457
17880989	6.55496	7.11942	-1.08611	0.0040114	LOC302228	XM_008770440
17882409	4.41641	4.79382	-1.08546	0.0169967	---	XM_008761114
17818283	5.16894	5.60336	-1.08404	0.0103713	Hhipl1	XM_343107
17614917	4.80004	5.20217	-1.08378	0.0351156	Fbxo17	NM_001013064
17760033	4.51802	4.89354	-1.08312	0.0288412	Lcn5	NM_024136
17646752	4.1243	4.46707	-1.08311	0.049519	---	ENSRNOT00000087642
17722963	3.90261	4.22519	-1.08266	0.0416856	LOC103694201	XM_008772077
17724729	4.82552	5.22402	-1.08258	0.0283738	Cetn1	NM_053461
17609361	5.16136	5.58504	-1.08209	0.000540465	---	---
17880998	6.24915	6.76002	-1.08175	0.0154444	LOC100910360	XM_008759475
17847132	4.66031	5.04089	-1.08166	0.0341472	Cpne4	NM_001109003
17736302	5.64504	6.10461	-1.08141	0.0418893	RGD1310081	XM_006232032
17693539	5.53018	5.97321	-1.08011	0.0457833	Alb	NM_134326
17612802	7.06705	7.63271	-1.08004	0.0485161	Tarm1	XM_008758841
17780546	5.60495	6.05015	-1.07943	0.0350577	Asb10	NM_001109216
17880800	6.18779	6.67774	-1.07918	0.00635951	---	ENSRNOT00000078189
17880794	5.3681	5.78249	-1.0772	0.0131505	---	GENSCAN00000021707
17662220	3.9995	4.30793	-1.07711	0.0442429	Lyzl6	NM_001135833
17655482	4.98068	5.36464	-1.07709	0.0358465	---	---
17679728	6.15983	6.63198	-1.07665	0.04029	---	ENSRNOT00000054487
17607931	4.96843	5.34637	-1.07607	0.00940002	---	---
17849822	5.54657	5.96666	-1.07574	0.0499535	LOC102555809	XM_008766004
17793039	5.68929	6.11974	-1.07566	0.0433762	---	ENSRNOT00000046568
17785395	4.81532	5.17687	-1.07508	0.0482733	Vom1r100	NM_173296
17632345	6.03331	6.48151	-1.07429	0.0296367	Acpt	NM_001107510
17780275	5.37897	5.77827	-1.07424	0.0357791	---	GENSCAN00000033810
17881124	5.35583	5.75283	-1.07412	0.0431658	---	ENSRNOT00000087944
17717715	6.33185	6.7992	-1.07381	0.0377289	Zfp748	XM_008774314
17719167	6.29444	6.75674	-1.07345	0.00508461	Foxq1	NM_022858
17807247	5.51283	5.91662	-1.07324	0.0360904	Grin3a	ENSRNOT00000007957
17604263	5.94312	6.37696	-1.073	0.0213613	---	---
17881014	5.84964	6.26747	-1.07143	0.0160507	---	GENSCAN00000024251
17703177	5.46947	5.85488	-1.07047	0.0317663	---	---
17846043	4.25841	4.55702	-1.07012	0.0299617	---	---
17774264	4.96077	5.30771	-1.06994	0.0354866	Olr630	NM_001001059
17874830	6.17564	6.60689	-1.06983	0.041127	Aff2	XM_006229538
17619131	5.94288	6.35701	-1.06969	0.0422093	LOC499219	NM_001047938
17637939	8.04838	8.60201	-1.06879	0.0306824	Ebf3	NM_001108506
17604945	5.09503	5.44268	-1.06823	0.0454924	---	---
17700834	5.24915	5.60224	-1.06727	0.0493691	---	---
17737593	4.95296	5.27772	-1.06557	0.0468085	Eif5a2	NM_001100697
17703132	8.01466	8.53566	-1.06501	0.00223061	Mcpt1l1	NM_001277668
17765501	5.99987	6.3893	-1.06491	0.00211071	Casc4	NM_001271283
17751329	5.55868	5.91867	-1.06476	0.00762591	Egf	NM_012842
17629067	7.19122	7.65268	-1.06417	0.0329363	LOC102555644	XM_008758832
17677021	4.84817	5.15919	-1.06415	0.0133023	Trim50	NM_181080
17799819	8.0427	8.55653	-1.06389	0.0141885	Ift74	NM_001007001
17713887	7.1744	7.62706	-1.06309	0.0130136	---	XM_008773616
17721759	5.43107	5.77102	-1.06259	0.0141662	Dsg2	XM_006222509
17883766	5.15601	5.46728	-1.06037	0.0199336	---	---
17671493	6.84642	7.25209	-1.05925	0.00974364	---	---
17639419	4.82285	5.10775	-1.05907	0.00547961	LOC103691276	XR_590567
17767178	8.15245	8.62374	-1.05781	0.0327164	---	---
17744073	8.46553	8.92687	-1.0545	0.00739047	Vcan	NM_001170558
17718561	9.18898	9.682	-1.05365	0.0494355	Ogn	NM_001106103
17665272	6.17139	6.50219	-1.0536	0.0195528	---	ENSRNOT00000052182
17880667	7.20897	7.59304	-1.05328	0.0294783	---	GENSCAN00000007478
17755755	9.1332	9.61704	-1.05298	0.0393135	Cd24	NM_012752
17745625	6.60614	6.93886	-1.05036	0.0162066	Osmr	NM_001005384
17613531	7.62107	8.00378	-1.05022	0.0363469	LOC100909747	ENSRNOT00000071957
17831126	5.12709	5.38009	-1.04934	0.0265312	43346	NM_019375
17674942	6.17652	6.47626	-1.04853	0.0339433	---	---
17674944	6.17652	6.47626	-1.04853	0.0339433	---	---
17777709	8.44171	8.84001	-1.04718	0.0380932	Esf1	NM_001100771
17800174	5.65186	5.91297	-1.0462	0.00250442	Ak4	NM_017135
17746253	9.21969	9.62981	-1.04448	0.0285208	Lrrcc1	NM_001100645
17708051	7.08474	7.39953	-1.04443	0.0379678	Zfp42	XM_002728408
17679273	5.63993	5.88822	-1.04402	0.0219634	---	---
17619452	8.90305	9.29344	-1.04385	0.0276252	---	GENSCAN00000047385
17705618	5.4841	5.70483	-1.04025	0.00848024	Farp1	NM_001107287
17823590	8.7954	9.14605	-1.03987	0.0144782	---	GENSCAN00000045464
17626511	9.18809	9.55027	-1.03942	0.0219418	Lysmd3	NM_001009698
17819362	6.48636	6.73639	-1.03855	0.0241072	---	---
17794981	7.96682	8.27084	-1.03816	0.0168666	---	NONRATT042205
17882961	7.96682	8.27084	-1.03816	0.0168666	---	NONRATT042205
17766338	5.57198	5.78276	-1.03783	0.0184606	Oxt	NM_012996
17816094	6.02349	6.24488	-1.03676	0.0400263	Cct6a-ps11	XR_593055
17870906	10.1617	10.5073	-1.03401	0.0300866	Med14	NM_001191727
17811774	4.40294	4.5465	-1.0326	0.0188837	Ubxn10	NM_001013093
17821442	9.05731	9.33341	-1.03048	0.0159534	Cbll1	NM_001108018
17813097	5.63781	5.80695	-1.03	0.0441176	Ccdc27	NM_001191063
17806222	10.3273	10.6234	-1.02868	0.00483009	Manea	NM_080785
17746766	9.61222	9.85275	-1.02502	0.0393846	Mynn	NM_001012178
17682999	5.44889	5.55195	-1.01891	0.0282932	---	GENSCAN00000017927
17689533	7.80186	7.66475	1.01789	0.0217452	---	---
17627637	8.75948	8.55657	1.02371	0.0347937	Epb41l2	XM_001053351
17698532	7.39941	7.22746	1.02379	0.0356144	---	ENSRNOT00000080233
17822695	10.0372	9.79824	1.02439	0.0463744	---	ENSRNOT00000082695
17744014	9.47827	9.24782	1.02492	0.0299231	Mef2c	XM_006223955
17802626	6.13779	5.98658	1.02526	0.0253673	---	---
17719453	8.45462	8.24303	1.02567	0.0179002	Cmah	NM_001024273
17668580	9.63863	9.39053	1.02642	0.0428879	---	GENSCAN00000042735
17653953	6.62078	6.43732	1.0285	0.0281839	Hmox2	NM_001277073
17661741	7.50034	7.29005	1.02885	0.0131645	Mpp3	NM_053668
17810304	7.60325	7.38078	1.03014	0.0487601	Bmp8a	NM_001109432
17604631	7.53159	7.29892	1.03188	0.0403392	---	---
17787096	10.4579	10.1309	1.03228	0.0489729	---	---
17648530	11.6143	11.2494	1.03243	0.00657996	---	---
17751599	10.2811	9.95632	1.03262	0.0197246	Dapp1	NM_001108568
17600547	8.93351	8.65047	1.03272	0.021349	---	---
17610061	8.93351	8.65047	1.03272	0.021349	---	---
17700807	9.31497	9.01936	1.03277	0.0336513	---	---
17882025	10.1269	9.80199	1.03315	0.0329546	---	NM_001101009
17880301	10.2835	9.95343	1.03316	0.0141612	LOC102548248	XM_008764471
17780326	6.81004	6.58713	1.03384	0.0465358	Cnpy1	XM_003749650
17869946	7.4933	7.24259	1.03462	0.0334648	---	NONRATT004056
17696859	11.3202	10.94	1.03476	0.0457475	Hpse	NM_022605
17880303	10.6091	10.2497	1.03507	0.0176572	LOC102548248	XM_008764471
17774168	10.9815	10.6064	1.03536	0.02206	Olr522	NM_001000562
17882177	8.47588	8.18229	1.03588	0.0433257	---	NM_138841
17663090	7.14623	6.89831	1.03594	0.00878484	Cd300le	NM_001202463
17759752	8.98545	8.67332	1.03599	0.0482936	---	---
17644106	10.7568	10.3803	1.03627	0.0307507	Srrm2	NM_001277154
17600831	7.17437	6.92241	1.0364	0.0366754	---	---
17782326	7.48302	7.21957	1.03649	0.003412	Akr1b10	NM_001013084
17605377	6.16888	5.95001	1.03679	0.0478521	---	---
17728146	6.56872	6.33351	1.03714	0.038689	LOC102557241	XM_008772245
17845871	5.9147	5.70135	1.03742	0.0123114	Onecut1	NM_022671
17695253	7.59277	7.31865	1.03745	0.0144466	Hgfac	NM_053320
17664544	9.32569	8.98852	1.03751	0.0334275	Scaf4	NM_001037347
17787099	9.0365	8.70963	1.03753	0.00942243	---	---
17661205	6.89536	6.64563	1.03758	0.0415755	Krt32	NM_001008818
17702240	8.06877	7.77259	1.03811	0.00822889	---	GENSCAN00000019612
17674687	7.08729	6.8271	1.03811	0.0222651	Cmklr1	NM_022218
17657180	7.40409	7.13171	1.03819	0.0109756	Cenpv	XM_002724504
17816410	9.2026	8.86214	1.03842	0.0283216	LOC690035	XM_008764722
17600847	7.20869	6.94175	1.03845	0.00392511	---	---
17623719	10.0545	9.68189	1.03849	0.0496018	Nxf1	NM_021579
17800846	6.88435	6.62679	1.03887	0.0445257	Mir761	NR_032765
17625604	9.08117	8.73846	1.03922	0.0488224	Lcor	XM_006223759
17602201	6.06443	5.83388	1.03952	0.0421925	---	---
17801019	6.51646	6.26863	1.03954	0.0348281	LOC100911772	XM_006225515
17875775	10.0764	9.69159	1.0397	0.0395337	---	---
17796611	7.95235	7.64854	1.03972	0.0177652	LOC102551296	XM_006234031
17826267	8.81236	8.47369	1.03997	0.0310979	---	---
17766082	5.75634	5.53383	1.04021	0.0377707	Fbln7	XM_001081124
17792274	7.33706	7.05304	1.04027	0.043768	Vamp5	NM_053555
17698351	6.11199	5.87301	1.04069	0.039791	LOC100359747	ENSRNOT00000064894
17702182	8.53015	8.19619	1.04075	0.00832232	---	ENSRNOT00000078665
17827203	6.50821	6.25333	1.04076	0.00197706	---	GENSCAN00000033022
17678731	8.9801	8.6282	1.04079	0.0247138	Oasl2	NM_001009682
17801819	5.09319	4.89335	1.04084	0.0186661	Oxct2a	NM_001012221
17812947	8.78336	8.43649	1.04111	0.0266237	Camta1	NM_001195559
17648532	9.38279	9.0119	1.04116	0.0488154	---	---
17782478	5.20987	5.00383	1.04118	0.0402978	Akr1d1	NM_138884
17600293	6.2729	6.02438	1.04125	0.0461172	---	---
17604573	6.11408	5.87027	1.04153	0.0417406	---	---
17719631	9.54121	9.1566	1.042	0.0444136	Elmo1	NM_001108415
17856096	6.76701	6.49368	1.04209	0.00377008	Arpp21	NM_001135045
17647946	6.2754	6.0209	1.04227	0.0451061	Zfp3	NM_001109034
17881493	6.77443	6.49852	1.04246	0.00555384	---	---
17881709	6.77443	6.49852	1.04246	0.00555384	---	---
17859773	8.65591	8.30252	1.04256	0.0362558	Abi2	NM_173143
17628098	8.06949	7.73983	1.04259	0.0334719	Rmnd1	NM_001040128
17695426	8.625	8.27233	1.04263	0.038791	Fam193a	XM_002724985
17606805	7.59035	7.27916	1.04275	0.0435875	---	---
17794919	9.11344	8.73954	1.04278	0.019496	Ptms	NM_031975
17875774	9.74738	9.3465	1.04289	0.0386374	---	---
17662664	9.89829	9.48734	1.04332	0.0499346	Prkca	NM_001105713
17609415	6.94002	6.6494	1.04371	0.0449773	---	---
17829240	9.96243	9.54341	1.04391	0.0150487	Pkhd1l1	NM_001034931
17662011	10.3175	9.88307	1.04396	0.0287913	Kif18b	NM_001039019
17845437	8.98547	8.60626	1.04406	0.0447077	Vps13c	XR_594055
17785849	7.86354	7.53138	1.0441	0.0250932	Bhlhe40	NM_053328
17633312	10.3096	9.8736	1.04415	0.038778	E2f8	XM_001080259
17602401	7.48498	7.16828	1.04418	0.047958	---	---
17602521	8.00531	7.66523	1.04437	0.0187456	---	---
17711454	8.57296	8.20766	1.04451	0.00311779	---	ENSRNOT00000082590
17879645	7.63742	7.31147	1.04458	0.00820925	Mir465	NR_032762
17761828	8.47499	8.11209	1.04474	0.0372376	Rabgap1	NM_001107841
17834225	7.48335	7.16234	1.04482	0.0307034	Wiz	NM_001108064
17662515	8.97057	8.58428	1.045	0.00284549	---	NM_031591
17649684	9.54412	9.13222	1.0451	0.0396866	Synrg	NM_053419
17743103	9.5354	9.12323	1.04518	0.0286283	Tspan5	NM_001004090
17614474	10.6941	10.2312	1.04524	0.0465825	Tgfb1	NM_021578
17880238	6.52125	6.2389	1.04526	0.0373311	---	---
17761841	9.16815	8.77065	1.04532	0.0175329	---	---
17646598	7.83238	7.49275	1.04533	0.0155351	---	---
17810315	9.80713	9.38087	1.04544	0.0249746	Macf1	NM_001135758
17700130	6.94221	6.64006	1.0455	0.0317834	---	ENSRNOT00000070257
17748839	9.26639	8.86288	1.04553	0.00258486	Slc50a1	NM_001106445
17822054	11.4571	10.9567	1.04567	0.0327936	LOC100359668	XR_593030
17882205	9.05689	8.65924	1.04592	0.0390731	---	NM_172023
17621377	7.63056	7.29426	1.04611	0.0212528	Plekha1	NM_001079894
17636301	10.6767	10.2049	1.04623	0.026649	---	NONRATT006201
17636302	10.6767	10.2049	1.04623	0.026649	---	---
17883181	7.76251	7.41836	1.04639	0.0448595	---	ENSRNOT00000051860
17623593	6.73711	6.43799	1.04646	0.0462493	Rcor2	NM_001013994
17731351	6.786	6.48207	1.04689	0.0316416	Bean1	XM_006222658
17841635	8.13935	7.77427	1.04696	0.0190939	Zfp385a	NM_001109470
17621188	10.1326	9.67805	1.04697	0.0103716	Tgfb1i1	NM_001191840
17726735	8.03048	7.6695	1.04707	0.0247551	---	GENSCAN00000041981
17611354	6.8599	6.55073	1.0472	0.0306582	Nkd2	NM_001107454
17755483	8.66587	8.27496	1.04724	0.0317621	Fyn	NM_012755
17708921	7.48476	7.14652	1.04733	0.0260474	Smim19	XM_002728416
17733691	6.68609	6.38371	1.04737	0.0199709	Ldhd	NM_001008893
17741359	9.19551	8.77933	1.0474	0.0250456	Trim45	NM_001106453
17636942	9.61001	9.17474	1.04744	0.040118	Arhgap17	NM_001270692
17794469	8.81689	8.41753	1.04744	0.0463542	Mical3	NM_001191085
17687658	6.56755	6.2695	1.04754	0.0300417	---	NONRATT018024
17882681	11.5341	11.0071	1.04788	0.0416699	---	NM_001013062
17650768	6.60563	6.30338	1.04795	0.036253	LOC257650	NM_147142
17706008	8.6643	8.26705	1.04805	0.0410125	Sfmbt1	NM_031647
17794787	7.76544	7.40877	1.04814	0.0300949	Atn1	NM_017228
17794897	10.4244	9.94528	1.04817	0.0267923	Cd4	NM_012705
17857344	6.6913	6.38369	1.04819	0.0272618	Cul9	NM_001191582
17790063	7.95303	7.587	1.04824	0.0469046	Wasl	NM_001110365
17600865	7.58463	7.23382	1.0485	0.0324547	---	---
17880863	6.32177	6.02919	1.04853	0.00666038	Smim24	XM_002726871
17731031	6.61722	6.31029	1.04864	0.0181942	Rab4a	NM_013019
17881042	6.52679	6.22395	1.04866	0.00791968	---	---
17624196	6.64204	6.33342	1.04873	0.0237079	Gif	NM_017162
17768632	7.71784	7.35852	1.04883	0.0349838	Ift52	NM_001177685
17607081	7.58223	7.22882	1.04889	0.023117	---	---
17705568	7.41481	7.06899	1.04892	0.0247165	---	ENSRNOT00000071627
17868742	7.41481	7.06899	1.04892	0.0247165	---	ENSRNOT00000070991
17820182	10.0947	9.62363	1.04895	0.024558	Rasgrp3	NM_001108009
17653043	7.48978	7.13951	1.04906	0.0218156	Tnrc6c	XM_008768441
17759558	7.83445	7.46745	1.04915	0.0273675	Clcn6	NM_001106479
17796582	7.86339	7.49402	1.04929	0.00390309	Bhlhe41	XM_002729454
17677830	7.1932	6.85469	1.04938	0.0491933	LOC100359816	XM_008760883
17706633	8.01716	7.63956	1.04943	0.0160003	LOC683605	XM_006222195
17822913	9.97216	9.5024	1.04944	0.0355299	Actn1	NM_031005
17647885	11.1253	10.5995	1.04961	0.00533661	Gp1ba	NM_001109654
17662959	5.59237	5.32759	1.0497	0.0443393	---	---
17874195	6.62801	6.31415	1.04971	0.0306422	Cldn2	NM_001106846
17784731	8.10269	7.71884	1.04973	0.0200177	Pcgf1	NM_001007000
17699821	6.31516	6.01476	1.04994	0.0194219	Nkx2-6	NM_001127653
17853338	7.29275	6.94544	1.05001	0.0200928	Map2k5	NM_001033987
17853813	9.48388	9.03165	1.05007	0.0381533	---	---
17668830	9.66374	9.20237	1.05014	0.0140648	Gcsam	XM_001064866
17882201	8.8885	8.46264	1.05032	0.0439589	---	NM_172009
17820266	9.82925	9.35663	1.05051	0.0403566	Birc6	NM_001170596
17627071	6.33588	6.03117	1.05052	0.0342849	---	ENSRNOT00000083044
17747418	8.82707	8.40231	1.05055	0.0264693	Ccna1	NM_001011949
17715862	7.78571	7.41071	1.0506	0.0465099	Zscan26	XM_001060246
17659318	9.60055	9.13762	1.05066	0.0286424	Slfn13	NM_001013970
17662317	9.46226	9.0049	1.05079	0.0499432	LOC100912866	ENSRNOT00000043327
17823056	9.17616	8.7323	1.05083	0.0494835	Dpf3	NM_001191818
17881801	8.59559	8.17908	1.05092	0.0286503	---	NM_001007150
17768314	8.30348	7.90009	1.05106	0.0462064	Rprd1b	NM_001098727
17801708	7.80489	7.42516	1.05114	0.0420293	Scmh1	NM_001109669
17862587	8.56413	8.14669	1.05124	0.0398126	Treml4	XM_006226713
17610691	8.23986	7.83822	1.05124	0.040928	Map3k5	NM_001277694
17821484	7.16056	6.81118	1.0513	0.0491162	Dus4l	NM_001135803
17661632	10.0366	9.54688	1.0513	0.049846	Ezh1	NM_001107051
17878974	6.07073	5.77408	1.05138	0.00602851	Rab9b	NM_001109018
17648549	9.91679	9.43097	1.05151	0.0420031	---	---
17828081	8.91288	8.47527	1.05163	0.0303312	E2f7	NM_001108092
17618739	5.97641	5.68284	1.05166	0.00833137	Ucp3	NM_013167
17754887	5.59207	5.31716	1.0517	0.0473729	Dnajc12	NM_001034032
17616529	6.96396	6.62159	1.0517	0.0337792	Ccdc114	NM_001126277
17736177	10.2441	9.73992	1.05177	0.00426533	Fyb	NM_001109176
17810736	6.59134	6.26651	1.05184	0.026793	Zfp362	NM_001191612
17611650	8.98892	8.54585	1.05185	0.0344442	Zdhhc14	NM_001039343
17807457	8.83549	8.39995	1.05185	0.0366437	Frrs1l	XM_006225329
17654057	4.52123	4.29809	1.05192	0.0475384	Olr1368	NM_214825
17838812	7.24053	6.8829	1.05196	0.0269672	Arhgap39	NM_173122
17806543	9.88051	9.39058	1.05217	0.0375165	Ubap2	NM_001107928
17679398	7.90549	7.51292	1.05225	0.0140988	Phlpp1	NM_021657
17882715	8.79903	8.36109	1.05238	0.0472279	---	NM_001010968
17710343	7.55618	7.18008	1.05238	0.0330759	---	GENSCAN00000030970
17703913	9.65151	9.17054	1.05245	0.0486861	Ptk2b	NM_017318
17718970	8.74696	8.31022	1.05255	0.0489045	Rreb1	NM_001107348
17867058	7.42501	7.05377	1.05263	0.0158572	Ptprm	NM_001168632
17777661	6.06307	5.75985	1.05264	0.0378586	Jag1	NM_019147
17684540	8.38297	7.96355	1.05267	0.0410173	Nav1	XM_003751240
17645302	8.11311	7.70675	1.05273	0.0496768	---	ENSRNOT00000078842
17693492	6.52424	6.19742	1.05274	0.0304628	LOC360919	XM_003751340
17841570	9.14842	8.68991	1.05276	0.0169021	Atf7	NM_001108115
17832348	8.24592	7.83224	1.05282	0.0366311	Letmd1	NM_001122781
17808996	8.24899	7.83514	1.05282	0.016588	Prkaa2	NM_023991
17771156	7.15763	6.79822	1.05287	0.0334699	RGD1311084	NM_001100979
17623689	7.5844	7.20335	1.0529	0.0405594	---	ENSRNOT00000079816
17642198	6.82099	6.478	1.05295	0.015506	Cutc	NM_001108525
17723192	7.0244	6.67095	1.05298	0.0117656	Prr16	NM_001108432
17685793	9.09785	8.64003	1.05299	0.0328924	Rabgap1l	NM_001107190
17608465	6.62367	6.28995	1.05306	0.0198651	---	---
17782592	9.47941	9.00179	1.05306	0.0458611	Tbxas1	NM_012687
17696278	8.02135	7.61671	1.05312	0.0469843	Hus1	NM_001109092
17799047	8.0792	7.67128	1.05317	0.048759	Fam206a	XM_002726530
17687699	7.65913	7.2722	1.05321	0.00706489	Traf3ip3	NM_001014132
17600857	7.2091	6.84469	1.05324	0.0189452	---	---
17869688	6.89805	6.54867	1.05335	0.0351496	---	ENSRNOT00000074647
17869690	6.89805	6.54867	1.05335	0.0351496	---	ENSRNOT00000074647
17673423	6.54576	6.21414	1.05336	0.00570541	Rimbp2	NM_001100488
17861938	7.95959	7.5559	1.05343	0.0233354	Pam	NM_013000
17761838	9.66956	9.17908	1.05344	0.0169357	---	---
17723932	5.78277	5.48924	1.05347	0.0346019	---	---
17677785	7.95197	7.54816	1.0535	0.0255209	Mlxip	XM_222162
17652383	7.96218	7.55679	1.05365	0.0378204	Cog1	NM_001107062
17803502	11.4835	10.898	1.05373	0.0398667	Pla2g2a	NM_031598
17785188	9.51765	9.03229	1.05374	0.0287133	Aak1	NM_001173450
17777260	7.69702	7.30444	1.05375	0.0230614	Pced1a	NM_001012348
17807896	7.53779	7.15317	1.05377	0.0494661	Fkbp15	XM_008763840
17848680	8.48547	8.05113	1.05395	0.0228101	Ctdspl	NM_001106865
17857692	8.6601	8.21651	1.05399	0.0364364	Runx2	NM_001278483
17795734	7.92261	7.51603	1.0541	0.0291835	---	ENSRNOT00000087464
17634190	7.16108	6.79336	1.05413	0.0123157	Pex11a	NM_053487
17603811	7.91043	7.50365	1.05421	0.0122442	---	---
17605895	7.19073	6.82094	1.05421	0.0134667	---	---
17628839	8.31876	7.89053	1.05427	0.0277978	Thbs2	NM_001169138
17830018	5.5004	5.21693	1.05434	0.00205686	RGD1311188	NM_001135897
17795541	8.85701	8.40033	1.05436	0.0151125	Ly49si2	NM_001009498
17627604	9.90487	9.39406	1.05438	0.0193782	Arhgap18	NM_001170575
17831430	6.70976	6.36283	1.05452	0.0498035	Trmu	NM_001135876
17608117	7.36192	6.98051	1.05464	0.0480612	---	---
17641983	10.6272	10.0766	1.05464	0.0130729	Pdlim1	NM_017365
17792709	7.34605	6.96501	1.05471	0.0171074	Exoc6b	NM_001109246
17800587	6.39161	6.05923	1.05485	0.0271472	Hspb11	NM_001131002
17656988	7.23562	6.85925	1.05487	0.00464591	Rnf112	NM_138613
17853811	9.3549	8.86794	1.05491	0.0269928	---	---
17670842	6.81683	6.46136	1.05502	0.0358921	Hic2	NM_001105862
17618140	7.23606	6.85854	1.05504	0.0486818	Rab38	NM_145774
17685169	6.48436	6.14495	1.05523	0.0410214	Tsen15	NM_001105958
17715845	6.61788	6.27131	1.05526	0.0113179	Zfp192	NM_001100574
17881799	8.64744	8.19428	1.0553	0.0394736	---	NM_001007150
17797933	7.45111	7.06032	1.05535	0.0298191	Rars2	NM_001106643
17843231	5.91362	5.60195	1.05564	0.0121335	Olr1201	NM_001000818
17603557	6.56354	6.21594	1.05592	0.0399331	---	---
17841209	10.209	9.66771	1.05599	0.0306636	Bin2	NM_001012223
17608619	6.71568	6.35909	1.05608	0.0378123	---	---
17617829	7.69907	7.28955	1.05618	0.00548178	---	---
17659230	8.63682	8.17697	1.05624	0.0430762	Myo1d	NM_012983
17874069	9.92718	9.39846	1.05626	0.0370285	Plp1	NM_030990
17757565	7.55005	7.14753	1.05632	0.00315781	LOC100365646	XM_006256266
17834517	10.5689	10.005	1.05637	0.0263823	Timp3	NM_012886
17669167	5.71602	5.41083	1.0564	0.0344384	Hgd	NM_001012145
17798739	7.43825	7.04025	1.05653	0.0326753	Stx17	NM_145723
17679983	5.68926	5.38478	1.05655	0.00303505	Slc26a9	NM_001107172
17710221	8.4656	8.01146	1.05669	0.0178259	Wdfy4	XM_006222110
17608691	6.43447	6.0891	1.05672	0.0215535	---	---
17666808	8.39161	7.9411	1.05673	0.0313472	Abcc5	NM_053924
17709506	7.36912	6.97325	1.05677	0.0233863	Polr3a	XM_001056048
17791831	5.61383	5.31222	1.05678	0.0340482	---	ENSRNOT00000085160
17807435	9.19497	8.70021	1.05687	0.0405516	Tmem245	XM_001059736
17698625	9.20504	8.70914	1.05694	0.0416237	Mrpl52	NM_001108375
17758769	8.14809	7.70902	1.05696	0.0228339	Mcm9	XM_008773008
17622279	11.7101	11.0787	1.05699	0.0462466	---	ENSRNOT00000078706
17738703	8.44077	7.98493	1.05709	0.0389109	Med12l	NM_001169130
17672376	7.92707	7.49882	1.05711	0.0115847	Ap4m1	NM_001037977
17796396	8.16997	7.72829	1.05715	0.0367127	Itpr2	NM_031046
17762893	10.0074	9.46604	1.05719	0.0489231	Itga6	NM_053725
17771204	8.82475	8.34695	1.05724	0.0306918	Fnbp1	NM_138914
17759134	10.3325	9.77297	1.05725	0.044003	Slc16a10	NM_138831
17883608	7.45917	7.05443	1.05737	0.0479957	---	---
17727304	7.85285	7.42657	1.0574	0.0419641	Atp9b	NM_001106130
17798181	6.21834	5.88077	1.0574	0.0199016	Dnajb5	NM_001108004
17793546	8.90632	8.4223	1.05747	0.0102207	Frmd4b	XM_001077268
17687277	9.77855	9.2466	1.05753	0.0441573	Degs1	NM_053323
17745113	8.52165	8.05794	1.05755	0.0401887	Zswim6	XM_006224011
17882207	6.56483	6.20693	1.05766	0.0153597	---	NR_028365
17692732	8.8122	8.33148	1.0577	0.0365795	Lrrc8c	NM_001037179
17683018	7.0118	6.6292	1.05771	0.0326448	Gpatch2	NM_001011909
17684103	5.99048	5.66316	1.0578	0.0262043	Mfsd4	NM_001109069
17718351	5.95015	5.625	1.0578	0.0309331	Cplx2	NM_053878
17708250	7.79618	7.37006	1.05782	0.0188503	Tnks	NM_001106084
17602683	5.94561	5.62056	1.05783	0.0492261	---	---
17710984	7.15407	6.76239	1.05792	0.00543781	Sugp2	NM_001108397
17721215	7.99736	7.55936	1.05794	0.0371606	Prtfdc1	NM_001106127
17613364	8.10131	7.65677	1.05806	0.0231895	Zfp128	XM_006222989
17707173	6.99019	6.60626	1.05812	0.000847041	Crtc1	NM_001047115
17603161	6.50563	6.14709	1.05833	0.0318586	---	---
17648537	10.2803	9.71352	1.05835	0.0274577	---	---
17702878	7.49388	7.0805	1.05838	0.0455451	Ap1g2	XM_002728280
17763127	7.80601	7.37534	1.05839	0.0222875	Rbm45	NM_153306
17645306	7.43738	7.02699	1.0584	0.0154895	---	ENSRNOT00000090622
17824116	8.20623	7.75338	1.05841	0.0175216	---	ENSRNOT00000085740
17841962	9.05431	8.55406	1.05848	0.0101871	Trpc6	NM_053559
17697472	6.9514	6.56728	1.05849	0.0152558	Oxsm	NM_001100508
17663879	5.89754	5.5713	1.05856	0.0132499	Mir338	NR_031783
17852041	7.03585	6.64654	1.05857	0.023023	Rnf214	XM_003750501
17735497	8.51227	8.04123	1.05858	0.00149462	Cd180	NM_001106405
17774210	6.11218	5.77361	1.05864	0.00468082	Olr552	NM_001001055
17684406	6.88937	6.50683	1.05879	0.0137582	Lgr6	XM_001062538
17742434	10.8143	10.2134	1.05883	0.00734042	Pde5a	NM_133584
17687448	6.73921	6.36294	1.05913	0.0443561	Lyplal1	NM_001105986
17620830	8.71414	8.22755	1.05914	0.0101838	Fbrs	XM_001080034
17698522	6.94408	6.55616	1.05917	0.00849212	---	ENSRNOT00000070991
17624146	6.41066	6.0525	1.05918	0.0311166	Ptgdr2	NM_001012070
17688131	5.95439	5.62165	1.05919	0.044226	---	---
17695957	9.05415	8.54775	1.05924	0.0390013	Emid1	NM_001109467
17699707	10.6777	10.0799	1.05931	0.0111171	Clu	NM_053021
17600835	7.83533	7.39639	1.05934	0.00953383	---	---
17807045	7.37341	6.96005	1.05939	0.0395103	Tstd2	NM_001108663
17608857	7.30794	6.89795	1.05944	0.0228138	---	---
17823391	5.77109	5.44713	1.05947	0.0485969	Angel1	NM_001108717
17814556	6.28253	5.9298	1.05948	0.0395594	RGD1563701	XM_001070724
17754283	7.64164	7.21166	1.05962	0.026818	Fam207a	NM_001008307
17635885	7.58403	7.15717	1.05964	0.00244376	Gvinp1	XM_008759822
17754196	8.14602	7.68746	1.05965	0.0391216	Trpm2	NM_001011559
17670723	8.50474	8.02596	1.05965	0.0404217	Smpd4	NM_001167806
17768821	7.87555	7.43218	1.05966	0.00703377	---	---
17851886	8.45513	7.97864	1.05972	0.0207569	Kmt2a	XM_006226455
17738477	5.39757	5.09338	1.05972	0.0296927	Stoml3	NM_001106431
17881659	8.37227	7.90041	1.05973	0.0109196	---	---
17688247	5.53023	5.21836	1.05976	0.00846533	Hsd17b13	NM_001009684
17836123	8.93098	8.42666	1.05985	0.0477661	Irak3	NM_001108101
17753528	6.871	6.48275	1.05989	0.0426284	Ppard	NM_013141
17676796	9.54114	9.00184	1.05991	0.0228873	LOC100910669	XM_008760835
17617828	8.52088	8.03918	1.05992	0.032015	---	---
17602203	8.74092	8.24658	1.05994	0.0354784	---	---
17623685	9.46427	8.92895	1.05995	0.0206723	LOC100912041	XR_590584
17766437	8.65652	8.16675	1.05997	0.0103864	Mavs	NM_001005556
17662710	8.0944	7.63592	1.06004	0.039418	---	---
17734638	7.11454	6.7114	1.06007	0.0231287	Clasrp	NM_001024294
17624393	7.6484	7.21485	1.06009	0.0192668	Prune2	XM_006231152
17671495	5.32383	5.0216	1.06019	0.0464966	---	---
17627322	9.66873	9.11952	1.06022	0.0439314	Stx11	NM_001025638
17636106	7.81571	7.37106	1.06032	0.0488169	Tmem9b	NM_001106289
17792566	8.10397	7.64291	1.06032	0.0328459	---	---
17628420	8.92974	8.42165	1.06033	0.0481729	Tagap	NM_001309449
17742609	4.88401	4.60603	1.06035	0.0270681	Pitx2	NM_001042505
17774458	7.52693	7.09807	1.06042	0.0124653	Madd	NM_053585
17672609	8.2303	7.76126	1.06043	0.0430096	Lrch4	NM_001127551
17826169	8.18555	7.71885	1.06046	0.0385624	Sgta	NM_022703
17855772	7.95668	7.50295	1.06047	0.0455564	Dag1	NM_053697
17619912	9.03801	8.52225	1.06052	0.028682	---	---
17790319	7.21525	6.80305	1.06059	0.0369668	Cep41	NM_001025770
17739433	7.31695	6.89871	1.06063	0.0186546	Fbxw7	XM_002729089
17709193	10.3902	9.79606	1.06065	0.0417798	Rasa3	NM_031574
17702184	6.79596	6.40677	1.06075	0.0479746	Rab2b	NM_001037645
17610273	5.0322	4.74402	1.06075	0.0162715	---	---
17839571	6.66044	6.27869	1.0608	0.0416783	A4galt	NM_022240
17678001	9.18634	8.65955	1.06083	0.0186948	Atxn2	XM_008760469
17696852	5.91009	5.57117	1.06083	0.0285191	Helq	NM_001014134
17737576	8.64602	8.15002	1.06086	0.0352605	Tnik	XM_008760893
17875765	10.2236	9.6371	1.06086	0.00687651	---	---
17713706	6.19258	5.83717	1.06089	0.0234039	Prss47	XM_006222308
17882495	6.67452	6.29114	1.06094	0.0482666	---	XM_001061720
17648935	6.51077	6.13621	1.06104	0.0495196	Slc46a1	NM_001013969
17762180	7.55099	7.11631	1.06108	0.00666539	RGD1560248	XM_001066238
17633940	7.51811	7.08526	1.06109	0.0136676	LOC102553828	XM_006229376
17753697	6.61065	6.22987	1.06112	0.0471521	Fgd2	NM_001107617
17881433	8.08868	7.62251	1.06116	0.0137187	---	NM_001126289
17713615	8.27333	7.79542	1.06131	0.0136342	Papd7	NM_001107333
17765662	8.54783	8.05324	1.06142	0.0409722	Sema6d	NM_001107768
17697062	6.83754	6.44142	1.0615	0.0204735	Synpo2l	NM_001305138
17689947	7.86917	7.41314	1.06152	0.00721031	Mir328b	NR_037399
17690185	7.07281	6.66292	1.06152	0.0102193	Ccdc149	XM_006221768
17665817	6.28619	5.92159	1.06157	0.0297146	Arhgap31	NM_001105879
17686712	9.12769	8.59786	1.06162	0.0142238	---	---
17822868	8.17858	7.70346	1.06168	0.00245198	---	---
17842051	9.15914	8.6269	1.06169	0.0314716	Sesn3	NM_001108125
17626298	7.5235	7.08631	1.0617	0.0331183	Neurl1	NM_001107605
17708619	8.17319	7.6981	1.06172	0.0311317	Letm2	NM_001012158
17751966	7.17995	6.76239	1.06175	0.00975127	Adgrl2	NM_001190475
17685434	6.73218	6.3405	1.06178	0.00659071	Mr1	NM_001100635
17695929	8.59316	8.09285	1.06182	0.00390479	Gas2l1	NM_001108365
17651355	5.75621	5.42055	1.06192	0.0115801	Rnd2	NM_001010953
17659003	7.85767	7.3993	1.06195	0.0287364	Ksr1	NM_001108284
17660338	8.77938	8.26707	1.06197	0.0222362	Kat7	NM_181081
17759688	8.21933	7.7392	1.06204	0.0207342	LOC680933	XM_006244044
17628303	7.26174	6.83751	1.06204	0.0487394	Cnksr3	NM_001012061
17655017	6.0007	5.65011	1.06205	0.0335006	Rab11fip3	XM_001062691
17856526	6.11301	5.75584	1.06205	0.0183308	Gorasp1	NM_019385
17620907	6.98115	6.57306	1.06208	0.0230065	---	ENSRNOT00000088627
17776701	7.8202	7.36305	1.06209	0.0168362	Cep152	XM_002726171
17837232	8.07159	7.5994	1.06214	0.0478151	Trps1	NM_001134837
17764103	9.11041	8.57739	1.06214	0.0197654	Arhgap1	NM_001107747
17616188	8.55138	8.051	1.06215	0.0107857	Irf3	NM_001006969
17684261	6.73979	6.34534	1.06216	0.00343702	Lax1	NM_001017491
17795712	5.52527	5.20101	1.06234	0.0293686	Styk1	XM_008763441
17622119	7.234	6.80932	1.06237	0.0417318	B4galnt4	NM_001107562
17677940	6.78467	6.38631	1.06238	0.0289142	---	ENSRNOT00000084579
17619902	6.886	6.48156	1.0624	0.0219774	---	---
17832590	7.43576	6.99896	1.06241	0.0496492	Znf740	XM_006226274
17730423	7.43299	6.99634	1.06241	0.0384921	Atmin	NM_001191786
17874631	10.5085	9.8909	1.06244	0.0346647	Fhl1	NM_001033926
17860670	7.42414	6.98763	1.06247	0.0069163	Gmppa	NM_001025056
17768210	10.4985	9.88085	1.06251	0.0398181	Myl9	XM_006235401
17846985	6.42346	6.04439	1.06271	0.0194172	Amotl2	NM_031717
17746202	7.36834	6.93349	1.06272	0.0121424	---	GENSCAN00000045714
17609563	6.32598	5.95219	1.0628	0.00987662	---	---
17832845	8.93986	8.41109	1.06287	0.026992	---	---
17637479	5.67484	5.33916	1.06287	0.0280644	Zfp629	NM_001107551
17703044	8.06984	7.59242	1.06288	0.0277975	Dhrs1	NM_001007621
17641753	5.99179	5.63723	1.06289	0.00732009	Cpeb3	XM_008760379
17688437	6.07837	5.71841	1.06295	0.0303696	---	ENSRNOT00000069193
17787979	8.85016	8.32595	1.06296	0.0441098	Pde3a	NM_017337
17726879	7.20008	6.77357	1.06297	0.0348839	Spire1	NM_001107381
17660199	5.4996	5.17363	1.06301	0.0227593	Mycbpap	NM_001009482
17719224	6.31652	5.94192	1.06304	0.000666571	---	ENSRNOT00000063068
17607045	7.68962	7.2332	1.0631	0.039548	---	---
17882361	7.14095	6.71645	1.0632	0.0408596	---	XM_001077176
17628061	9.10083	8.55973	1.06322	0.0491466	Lpcat1	NM_001100735
17756566	7.32899	6.89302	1.06325	0.0368362	Nelfe	NM_001165901
17783542	11.2895	10.6166	1.06338	0.0122122	Npy	NM_012614
17788833	8.32605	7.82937	1.06344	0.0290069	Gsap	NM_001107845
17882353	10.1235	9.51956	1.06344	0.0209894	---	XM_008759019
17752588	7.57599	7.12353	1.06352	0.0084798	Atat1	NM_212498
17628506	5.79305	5.44697	1.06354	0.014469	---	ENSRNOT00000023387
17631566	7.69983	7.23965	1.06356	0.00662828	Proser3	NM_001127579
17723217	7.2058	6.7745	1.06366	0.00081831	Zfp474	NM_001107380
17851106	10.6687	10.0299	1.06369	0.0179719	Nrgn	NM_024140
17879979	8.51637	8.00644	1.06369	0.0477612	Mecp2	NM_022673
17651181	8.67919	8.15949	1.06369	0.0487652	Mlx	NM_001034112
17761738	10.1109	9.50515	1.06373	0.0319951	Ptgs1	NM_017043
17880477	8.04815	7.56521	1.06384	0.00726601	---	ENSRNOT00000091620
17824629	7.42423	6.97789	1.06397	0.0451268	Nudt14	NM_001106760
17735683	8.42524	7.91849	1.064	0.014787	Pde4d	NM_001113328
17820202	9.26192	8.70478	1.064	0.0175847	Ltbp1	NM_021587
17676396	8.2186	7.72415	1.06401	0.0287668	Fam20c	NM_001012238
17615105	7.55562	7.10083	1.06405	0.0029927	---	---
17839434	8.77207	8.24355	1.06411	0.0499392	Cenpm	NM_001130504
17601147	6.58132	6.18471	1.06413	0.0321264	---	---
17601481	6.58132	6.18471	1.06413	0.0321264	---	---
17811113	8.73721	8.21011	1.0642	0.0118809	Slc9a1	NM_012652
17881975	5.98054	5.61939	1.06427	0.0264088	---	NM_022586
17748240	9.54223	8.96595	1.06427	0.031662	Gucy1a3	NM_017090
17673871	7.92768	7.44832	1.06436	0.00247607	Rhof	XM_001073389
17690963	8.50523	7.99079	1.06438	0.00967545	---	---
17606625	7.99939	7.51499	1.06446	0.036569	---	---
17607269	7.99939	7.51499	1.06446	0.036569	---	---
17707040	7.43238	6.98225	1.06447	0.0166508	Mast3	NM_001134796
17836682	5.92873	5.56966	1.06447	0.0191228	Nab2	NM_001134874
17680149	7.52504	7.069	1.06451	0.0158485	Plekha6	XM_006249816
17780128	6.43047	6.04005	1.06464	0.0434263	Helz2	NM_001305276
17718758	6.93603	6.51474	1.06467	0.0187959	Sirt5	NM_001004256
17714462	6.4987	6.10349	1.06475	0.00573631	Mxd3	NM_145773
17678700	8.7546	8.2217	1.06482	0.0478398	Sppl3	XM_003751200
17817694	5.37559	5.04835	1.06482	0.035437	RGD1565693	XM_001059991
17834833	4.72415	4.43645	1.06485	0.0417875	Ascl1	NM_022384
17867926	8.38648	7.87565	1.06486	0.0411628	Dpp9	NM_001305241
17791208	7.20154	6.76263	1.0649	0.0154378	Gimap6	NM_001011968
17637892	5.60925	5.26728	1.06492	0.0437343	Fam196a	NM_001143803
17715650	6.5965	6.19429	1.06493	0.018605	Lrrc16a	NM_001191692
17622281	9.07064	8.51742	1.06495	0.0473967	Pnpla2	NM_001108509
17831594	8.7316	8.19781	1.06511	0.0463464	Ppp6r2	NM_001106789
17756594	6.37174	5.98218	1.06512	0.029671	Tnxb	BC168181
17840024	8.46919	7.95103	1.06517	0.0491442	Sbf1	NM_001271173
17682489	8.64504	8.11596	1.06519	0.0169601	Cnst	XM_001060344
17845210	6.82934	6.41083	1.06528	0.029622	Ubap1l	XM_006243297
17848650	6.87942	6.45777	1.06529	0.0381236	Itga9	XM_008757902
17606367	7.71938	7.24588	1.06535	0.00291054	---	---
17622759	6.1034	5.72855	1.06544	0.0499909	LOC688778	XM_008758323
17867717	6.93881	6.51185	1.06557	0.0206384	Slc25a23	NM_001106873
17874787	6.92582	6.49929	1.06563	0.0483119	---	ENSRNOT00000083416
17647603	7.94131	7.45147	1.06574	0.0498936	Ybx2	NM_001305212
17750822	7.39219	6.936	1.06577	0.0232804	S1pr1	NM_017301
17805646	5.51597	5.17539	1.06581	0.0498408	Penk	NM_017139
17760081	5.35323	5.02246	1.06586	0.0352862	Obp2b	NM_173148
17643720	5.89935	5.53472	1.06588	0.00732148	Eef2kmt	NM_001106975
17777693	6.53988	6.13554	1.0659	0.047437	Tasp1	NM_001044243
17727473	6.76508	6.34661	1.06594	0.0198732	Chn3	ENSRNOT00000058177
17713817	6.55834	6.1525	1.06596	0.042304	Ptch1	NM_053566
17792989	8.33605	7.81979	1.06602	0.0436816	Aplf	NM_001173382
17803076	8.61274	8.07909	1.06605	0.0442843	Cnr2	NM_001164142
17602423	7.69196	7.21523	1.06607	0.0371743	---	---
17600801	7.52417	7.0575	1.06612	0.0227289	---	---
17798252	6.89471	6.46702	1.06613	0.00951222	Tesk1	NM_031578
17674101	7.77801	7.2954	1.06615	0.0489798	Mapkapk5	NM_001025761
17663823	10.6458	9.98503	1.06618	0.0307521	Lgals3bp	NM_139096
17635685	7.19042	6.74407	1.06618	0.0010323	Trim30c	XM_006223438
17619910	8.43729	7.91311	1.06624	0.0468161	---	---
17824012	7.97193	7.47642	1.06628	0.0226327	Ddx24	NM_199119
17687292	9.43414	8.84754	1.0663	0.048198	Capn2	NM_017116
17690757	6.23891	5.85032	1.06642	0.0385002	Tnip2	NM_001024771
17748225	9.16585	8.59447	1.06648	0.0277602	Gucy1b3	NM_012769
17774623	6.88675	6.45726	1.06651	0.0277399	Creb3l1	NM_001005562
17643921	6.71869	6.29964	1.06652	0.0477233	Adcy9	XM_008767525
17644606	6.42022	6.0195	1.06657	0.015013	Tekt4	NM_001013965
17691639	4.99041	4.67892	1.06657	0.0195105	Vstm2a	XM_006221845
17606019	6.59286	6.18134	1.06657	0.000636246	---	---
17704358	7.07949	6.63708	1.06666	0.0495452	Bmp1	NM_031323
17880432	7.34538	6.88601	1.06671	0.0103613	Igip	XM_006222542
17632466	6.38803	5.98775	1.06685	0.00445104	Myh14	NM_001100690
17786921	8.37323	7.84838	1.06687	0.0138746	Foxj2	NM_001109352
17641320	8.40253	7.87579	1.06688	0.0424051	Fam122a	NM_001014029
17678846	6.8867	6.45413	1.06702	0.0320494	Ung	NM_001013124
17654999	6.48496	6.07687	1.06715	0.0128027	LOC302999	XM_003750793
17831028	9.1916	8.61254	1.06723	0.0477129	Xrcc6	NM_139080
17835470	7.23672	6.78064	1.06726	0.0200357	Mettl25	NM_001108089
17875499	7.38204	6.91675	1.06727	0.0312725	Slc25a43	XM_003752132
17696446	8.67491	8.12767	1.06733	0.0113474	Meis1	NM_001134702
17747284	7.94878	7.44692	1.06739	0.0143442	Setd7	NM_001109558
17610611	8.38428	7.8544	1.06746	0.0307852	Reps1	NM_001106264
17677004	7.68161	7.19535	1.06758	0.0200162	Rhbdd2	NM_001191827
17857454	6.72803	6.30206	1.06759	0.0304625	Pex6	NM_057125
17610600	6.81225	6.38024	1.06771	0.0281855	---	---
17725274	6.73141	6.30368	1.06785	0.0365842	Sft2d3	NM_001108887
17851432	9.26585	8.67648	1.06793	0.0400476	Ubash3b	NM_001191792
17725092	7.42857	6.95547	1.06802	0.0387062	RGD1562080	XM_006254447
17709399	6.35234	5.94776	1.06802	0.0310673	Col4a1	NM_001135009
17644527	8.7003	8.14592	1.06806	0.0419018	---	---
17791118	6.44253	6.03188	1.06808	0.00706063	Tpk1	NM_001134994
17686123	5.44699	5.09976	1.06809	0.0214281	Gorab	NM_001100563
17800578	5.80176	5.43106	1.06825	0.01487	Ldlrad1	XM_006225444
17791329	5.30256	4.96371	1.06827	0.00748148	Npvf	NM_023952
17881939	7.30052	6.83395	1.06827	0.0442403	---	XM_006227052
17870833	6.1644	5.76999	1.06836	0.0447973	---	GENSCAN00000041529
17643139	6.11408	5.72258	1.06841	0.0238021	Vax1	NM_022636
17660276	4.7281	4.42528	1.06843	0.0477367	Sgca	NM_001107039
17674601	5.42512	5.07744	1.06847	0.0444207	Alkbh2	NM_001126273
17735400	6.33427	5.92813	1.06851	0.00516382	Enc1	NM_001003401
17617775	7.41085	6.93543	1.06855	0.0485936	Vps33b	NM_022286
17618702	8.63371	8.07938	1.06861	0.0304063	C2cd3	NM_001191602
17758888	5.26636	4.92764	1.06874	0.0223228	---	NONRATT033356
17760946	8.23565	7.70569	1.06878	0.0362611	Nup188	XM_001077334
17774291	6.20588	5.80635	1.06881	0.0074303	Olr663	NM_001000346
17687187	6.42021	6.00636	1.0689	0.0183245	Nvl	NM_001105980
17732070	6.9332	6.48612	1.06893	0.0492939	Adcy7	NM_053396
17782404	9.38994	8.78443	1.06893	0.0109087	Tmem140	NM_001009709
17772978	7.76434	7.26256	1.06909	0.00928656	Stk39	NM_019362
17686791	4.86701	4.55243	1.0691	0.0413085	Kcnj9	XM_008769730
17847455	6.56672	6.14225	1.06911	0.0244984	Zmynd10	NM_001004284
17753792	6.54046	6.11684	1.06925	0.0131033	---	ENSRNOT00000091250
17790649	7.81782	7.31146	1.06926	0.0161951	Creb3l2	NM_001012188
17875788	8.89838	8.32181	1.06928	0.0245812	---	---
17804840	5.74353	5.37137	1.06929	0.0461947	Morn1	NM_001005544
17689334	7.66495	7.16828	1.06929	0.0120388	Aasdh	XM_006250858
17727004	6.48706	6.06664	1.0693	0.0374606	Poli	NM_001106137
17666423	10.4894	9.80921	1.06935	0.0296318	Gp5	NM_012795
17826986	7.6863	7.1868	1.0695	0.0488417	Zfp414	NM_001009664
17723822	7.43876	6.95525	1.06952	0.0394807	---	---
17629549	7.70637	7.20546	1.06952	0.0474147	Zfp524	NM_001108905
17633169	7.54702	7.05608	1.06958	0.0292131	Saal1	XM_003748860
17723564	11.5622	10.8098	1.0696	0.0199515	Cd74	NM_013069
17653311	7.87983	7.367	1.06961	0.0294691	Hgs	NM_019387
17690744	8.49783	7.94439	1.06966	0.030155	Mfsd10	NM_001191680
17604077	6.9894	6.53416	1.06967	0.00148192	---	---
17649349	6.2024	5.79832	1.06969	0.0381095	Rhbdl3	NM_001105819
17754248	6.80984	6.36604	1.06971	0.00195429	LOC690431	XM_006223844
17754515	6.70136	6.26463	1.06971	0.0176904	Mir678	NR_032769
17631828	6.03217	5.63883	1.06976	0.0488702	Hpn	NM_017112
17883139	6.97244	6.51775	1.06976	0.0169113	---	NONRATT042544
17684677	6.23827	5.83117	1.06981	0.0464131	---	ENSRNOT00000043688
17686582	6.10554	5.70708	1.06982	0.0341283	Tomm40l	NM_001083338
17883133	7.35468	6.87427	1.06988	0.00223642	---	NEAT1
17601979	9.4402	8.82353	1.06989	0.00781311	---	---
17769283	6.33821	5.92411	1.0699	0.0266775	Fam209a	NM_001106548
17813143	9.92477	9.27615	1.06992	0.0164373	Tnfrsf14	NM_001015034
17713065	8.94158	8.35715	1.06993	0.0384943	Atp11a	NM_001107324
17716183	7.90897	7.39179	1.06997	0.016181	Map3k8	NM_053847
17622506	8.23527	7.69668	1.06998	0.0216238	Tspan32	XM_002725757
17602757	7.27058	6.79494	1.07	0.0158133	---	---
17874994	7.87453	7.35886	1.07008	0.038217	Zfp275	NM_001106343
17875860	10.4437	9.75866	1.0702	0.0079047	NEWGENE_1565481	XM_002727525
17785785	8.0207	7.4942	1.07025	0.0291286	Itpr1	NM_001007235
17717829	6.42935	6.00719	1.07028	0.028332	Npepo	NM_001012346
17731766	7.32966	6.84799	1.07034	0.0473426	Ogfod1	NM_001107411
17876325	5.04539	4.71378	1.07035	0.0259882	Cacna1f	NM_053701
17644435	7.73641	7.2276	1.0704	0.0359827	Ift140	XM_002727728
17727893	6.54032	6.10987	1.07045	0.0070573	Ccdc102a	NM_001108437
17653063	5.79814	5.41637	1.07048	0.0138006	Engase	NM_001107070
17619462	7.79969	7.28511	1.07063	0.01283	---	ENSRNOT00000083317
17676754	6.08212	5.68085	1.07064	0.0337054	Irs3	NM_032074
17665683	6.06875	5.66808	1.07069	0.0433592	Sidt1	NM_001100653
17600791	7.7355	7.22476	1.07069	0.00494357	---	---
17688091	7.0209	6.55727	1.07071	0.0485564	---	---
17810808	6.04264	5.64326	1.07077	0.0337278	Zbtb8b	NM_001109265
17603447	6.77546	6.32759	1.07078	0.029565	---	---
17821349	4.99657	4.66607	1.07083	0.0143396	---	NONRATT047977
17822982	4.04721	3.77944	1.07085	0.0168816	Ccdc177	XM_006225839
17820856	5.71188	5.33395	1.07085	0.00152162	Kcnk3	NM_033376
17638074	5.81786	5.4328	1.07088	0.0355418	LOC103691261	XM_008760018
17688433	5.74679	5.36619	1.07092	0.0140468	---	---
17839095	6.96995	6.50777	1.07102	0.00402679	RGD1359634	NM_001007708
17705225	8.85615	8.26874	1.07104	0.0202313	Abcc4	NM_133411
17643381	7.09028	6.61996	1.07105	0.00467839	---	ENSRNOT00000080445
17780911	6.4127	5.98726	1.07106	0.0383156	Phtf2	NM_001106577
17750735	5.76298	5.38054	1.07108	0.0268211	---	ENSRNOT00000080226
17877843	6.2465	5.83177	1.07111	0.0294991	Maged1	NM_053409
17648541	9.87276	9.21693	1.07115	0.00671608	---	---
17729005	7.14612	6.67108	1.07121	0.00975499	Gab1	NM_001108444
17734091	5.8154	5.42861	1.07125	0.00622245	Car5a	NM_019293
17626597	7.71155	7.19852	1.07127	0.0309377	Casp7	NM_022260
17726618	7.91542	7.38834	1.07134	0.0411447	Adrb2	NM_012492
17605889	8.36453	7.80746	1.07135	0.0309556	---	---
17774553	6.24958	5.83305	1.07141	0.028207	Znf408	XM_003749532
17617421	5.39678	5.03704	1.07142	0.044246	Adamts17	XM_001059825
17601029	8.05546	7.51838	1.07144	0.0447954	---	---
17601363	8.05546	7.51838	1.07144	0.0447954	---	---
17710846	5.66518	5.28721	1.07149	0.03993	Rab3a	NM_013018
17686368	7.11613	6.641	1.07154	0.00851796	Pbx1	NM_001100681
17658050	10.2375	9.55388	1.07155	0.0450942	Rnasek	NM_001137561
17759339	5.88791	5.49469	1.07156	0.0301603	Lace1	ENSRNOT00000076620
17702278	5.08443	4.74474	1.07159	0.0368498	---	---
17641660	4.55868	4.25399	1.07162	0.00454556	Ch25h	NM_001025415
17780018	5.78441	5.3977	1.07164	0.0234236	Tcfl5	XM_006224779
17756649	8.92966	8.33256	1.07166	0.0194931	Agpat1	NM_212458
17660371	6.99361	6.52597	1.07166	0.0382563	Abi3	NM_001013118
17850369	5.86916	5.47659	1.07168	0.0408261	Dock6	NM_001108997
17676907	7.24203	6.75747	1.07171	0.0362807	Upk3bl	NM_001109020
17844008	8.20773	7.65823	1.07175	0.0409212	Il18	NM_019165
17620098	4.84059	4.5165	1.07176	0.0397905	Abca16	XM_006223476
17755996	6.74429	6.29246	1.0718	0.0399928	Gabbr1	NM_031028
17753245	5.745	5.3601	1.07181	0.0277889	B3galt4	NM_133553
17791480	7.76928	7.24857	1.07184	0.0382422	Nod1	NM_001109236
17820985	9.43462	8.80211	1.07186	0.0494503	Mfsd2b	XM_002729615
17710898	7.55957	7.05253	1.0719	0.0357404	Lrrc25	XM_001070537
17603337	7.60757	7.09714	1.07192	0.0428772	---	---
17798359	6.57442	6.13298	1.07198	0.0184358	Reck	NM_001107954
17672714	8.05806	7.51682	1.072	0.00251821	RGD1566006	XM_006249195
17622194	6.04795	5.64123	1.0721	0.0142459	Rassf7	NM_001106317
17704266	7.40467	6.90639	1.07215	0.0226789	Sorbs3	NM_001005762
17852898	7.21371	6.72811	1.07217	0.0381712	RGD1305464	NM_001025011
17787678	8.37766	7.81347	1.07221	0.0284557	Etv6	NM_001037353
17653483	7.61284	7.10007	1.07222	0.0154477	---	NONRATT010467
17698579	5.65346	5.27244	1.07227	0.0438135	LOC290071	AY227970
17675525	4.9125	4.58133	1.07229	0.0334355	---	---
17882677	8.02978	7.4882	1.07232	0.0470227	---	NM_001012235
17764218	6.12156	5.7086	1.07234	0.0484225	Tp53i11	NM_001107749
17838576	9.00388	8.39645	1.07234	0.0402469	Sharpin	NM_031153
17677506	7.53872	7.0299	1.07238	0.0237811	Atp6v0a2	ENSRNOT00000087698
17651161	5.88797	5.49053	1.07239	0.0275121	Hsd17b1	NM_012851
17636307	5.41101	5.04574	1.07239	0.0357444	Galnt18	NM_001079884
17673512	8.34148	7.77825	1.07241	0.0416428	Ubc	NM_017314
17770460	7.85626	7.32526	1.07249	0.0421405	Camsap1	NM_001168549
17826927	7.44291	6.93981	1.0725	0.0344204	Adamts10	NM_001271445
17639126	8.22084	7.66502	1.07251	0.0437059	Rps6kb2	NM_001010962
17817897	6.54695	6.10368	1.07262	0.0423189	RGD1311756	NM_001173557
17865725	7.66443	7.14503	1.07269	0.0404225	Dnpep	NM_001024879
17656505	8.48486	7.90915	1.07279	0.044765	Fam183b	XM_006220684
17780369	7.3148	6.81824	1.07283	0.00606045	---	---
17792086	4.78743	4.46235	1.07285	0.0403777	---	GENSCAN00000052046
17732834	8.53818	7.95762	1.07296	0.00812641	Inpp4b	NM_053917
17778405	6.97163	6.49754	1.07296	0.0324947	Commd7	NM_001030029
17802265	6.9127	6.44233	1.07301	0.0213006	Smim12	NM_001276483
17786577	7.72969	7.20349	1.07305	0.0287822	---	---
17813194	8.23702	7.67617	1.07306	0.037543	Ski	XM_006225662
17844990	7.01882	6.5408	1.07308	0.0295626	---	ENSRNOT00000079293
17682168	6.72467	6.26641	1.07313	0.0184815	Vsig8	NM_001105972
17874481	7.67334	7.15024	1.07316	0.0261916	---	---
17644615	6.85447	6.38719	1.07316	0.00591092	Lmf1	XM_001060521
17780176	7.00349	6.52529	1.07328	0.0217	Arfrp1	NM_053980
17793775	7.40064	6.89511	1.07332	0.0412681	Srgap3	NM_001191975
17838866	6.69455	6.23706	1.07335	0.00419522	Apol9a	NM_001025066
17675923	8.14585	7.58868	1.07342	0.0319546	Bri3	NM_001009604
17847732	7.46942	6.95819	1.07347	0.0146172	Dalrd3	NM_001014214
17752407	6.39227	5.9542	1.07357	0.0115697	Trim39	NM_213562
17637186	7.98821	7.44075	1.07358	0.0284063	Cln3	NM_001006971
17646391	6.4908	6.0453	1.07369	0.0373353	Rai1	NM_001271207
17644476	6.80695	6.33971	1.0737	0.0445797	Clcn7	NM_031568
17756177	8.34293	7.77019	1.07371	0.0316264	Dhx16	NM_212496
17661913	10.3824	9.66919	1.07376	0.04695	Itga2b	XM_001063315
17838226	7.74742	7.21479	1.07382	0.00583115	RGD1565410	ENSRNOT00000082405
17799716	7.59281	7.07049	1.07387	0.00836884	---	GENSCAN00000059596
17618362	6.72865	6.26551	1.07392	0.0391655	Nars2	NM_001034921
17658904	6.18621	5.76013	1.07397	0.0383877	Tlcd1	NM_001013858
17859083	7.27015	6.76905	1.07403	0.0166083	LOC685203	XM_006226824
17845272	9.84099	9.16176	1.07414	0.013101	Rbpms2	NM_001173426
17807601	6.00917	5.59417	1.07418	0.0417244	Olr854	NM_001000582
17673111	7.2225	6.7234	1.07423	0.0098184	---	ENSRNOT00000062923
17673112	7.2225	6.7234	1.07423	0.0098184	---	---
17806886	8.53867	7.94855	1.07424	0.0157013	Gba2	NM_001013091
17607957	5.65169	5.26104	1.07425	0.0114693	---	---
17774348	5.79686	5.39581	1.07433	0.0445142	Olr705	NM_001000570
17626410	5.80229	5.40008	1.07448	0.0494315	Ins1	NM_019129
17618317	5.87156	5.46418	1.07456	0.0245794	Fam181b	NM_001109150
17629913	8.1083	7.54525	1.07462	0.00114734	Zswim9	XM_006223077
17649141	6.72431	6.25733	1.07463	0.00405701	Ankrd13b	XM_008768134
17881955	8.30111	7.72462	1.07463	0.0124291	---	NM_001048047
17810860	7.98333	7.42886	1.07464	0.0433774	Tmem39b	NM_001014192
17631448	9.0365	8.40849	1.07469	0.0100647	---	GENSCAN00000029479
17721306	6.71176	6.2448	1.07478	0.01123	Mtcp1	XM_574098
17602723	7.63369	7.10253	1.07478	0.00537277	---	---
17721919	7.89687	7.34733	1.0748	0.0215329	---	---
17811491	6.63452	6.17235	1.07488	0.00252091	---	GENSCAN00000005918
17723951	6.13572	5.70829	1.07488	0.0323015	---	ENSRNOT00000080776
17765325	6.58276	6.12376	1.07495	0.00645271	Stard9	XM_001080099
17706037	8.07848	7.51478	1.07501	0.0427235	Tmem110	NM_198774
17833862	8.60008	7.99995	1.07502	0.0361983	Abca7	NM_207598
17611535	9.47858	8.81672	1.07507	0.00575027	Myct1	NM_001106207
17665355	7.73546	7.19518	1.07509	0.00307663	Nfkbiz	NM_001107095
17877237	5.00914	4.6592	1.07511	0.0312569	Adgrg2	NM_001270871
17825366	5.66192	5.26636	1.07511	0.0212356	Gareml	NM_001191874
17761468	8.34382	7.76041	1.07518	0.0253333	Ciz1	NM_001106568
17881391	7.53065	7.00389	1.07521	0.0233634	---	NM_022251
17614698	7.92173	7.36749	1.07523	0.0133076	Prx	NM_023976
17876870	7.88697	7.33513	1.07523	0.00578408	Shroom2	NM_001047893
17659346	7.22818	6.72231	1.07525	0.0199811	---	ENSRNOT00000082909
17798602	7.29014	6.77977	1.07528	0.019112	---	---
17784686	7.20813	6.70311	1.07534	0.0244367	Loxl3	NM_001107866
17783187	6.17152	5.739	1.07537	0.00425742	Zfp398	NM_001109230
17654406	6.21398	5.77846	1.07537	0.0221733	E4f1	NM_001185046
17770205	8.02425	7.46184	1.07537	0.0349974	Ndor1	NM_001107818
17643262	7.80636	7.25889	1.07542	0.0331915	LOC100912948	XM_006220557
17842798	6.79332	6.31675	1.07544	0.0394727	Igsf9b	XM_001054496
17639167	8.95705	8.32854	1.07546	0.0417038	Rad9a	XM_002725766
17783592	5.25395	4.88507	1.07551	0.0343994	RGD1564419	NR_132628
17831946	9.75926	9.07371	1.07555	0.0113346	Ano6	NM_001108108
17829943	9.16502	8.52104	1.07558	0.0399656	Ly6e	NM_001017467
17808377	5.90121	5.48563	1.07576	0.0110502	---	ENSRNOT00000085032
17686304	7.0464	6.54944	1.07588	0.047489	Pogk	NM_001107194
17793636	6.66089	6.19094	1.07591	0.00527581	Shq1	NM_001134713
17792500	6.61681	6.14988	1.07593	0.0495095	Mrpl19	NM_001029898
17841204	7.67795	7.13585	1.07597	0.019442	Smagp	NM_182817
17878181	7.21415	6.70452	1.07601	0.0221824	Phka1	NM_022626
17881177	6.71135	6.23715	1.07603	0.0476541	---	RPTR-AB076373-2
17881299	6.71135	6.23715	1.07603	0.0476541	---	RPTR-U43284-1
17881311	6.71135	6.23715	1.07603	0.0476541	---	RPTR-U57609-1
17743671	6.7613	6.28356	1.07603	0.0165171	Ptger3	NM_012704
17617874	7.68334	7.14029	1.07605	0.0335281	Pde8a	NM_198767
17692630	8.73653	8.11895	1.07607	0.0291887	---	---
17769474	6.5563	6.09261	1.07611	0.0191219	Cdh4	XM_001061943
17670051	7.71366	7.16793	1.07614	0.0253666	Lpp	NM_001013864
17810648	6.81004	6.32813	1.07615	0.00561985	Ncdn	NM_053543
17843951	8.3344	7.74461	1.07616	0.041122	Zw10	NM_001024801
17769726	8.65585	8.0429	1.07621	0.0297335	Ppdpf	NM_001009316
17733134	8.9199	8.28805	1.07624	0.0132978	Acd	NM_001037193
17702610	7.16022	6.65299	1.07624	0.0258406	Slc7a7	NM_031341
17804162	6.89775	6.40873	1.07631	0.0490968	Mad2l2	NM_001012106
17799330	5.45108	5.06447	1.07634	0.00864888	Mir455	NR_032279
17695215	7.93451	7.37169	1.07635	0.0473669	Acox3	NM_053339
17792293	6.13779	5.70175	1.07647	0.014373	Sh2d6	XM_008763005
17700870	5.54898	5.15477	1.07648	0.0370703	---	NONRATT020924
17711572	6.84647	6.35976	1.07653	0.00259406	LOC365085	XM_008758106
17750295	5.78627	5.37478	1.07656	0.00907314	LOC100912312	NR_131104
17716287	8.7749	8.14947	1.07675	0.0246211	Gpr137b	NM_001105978
17702334	5.6091	5.2091	1.07679	0.0017831	---	ENSRNOT00000060298
17820764	6.84965	6.36106	1.07681	0.034902	Emilin1	NM_001106710
17646142	5.51916	5.12517	1.07687	0.00169549	Sh3bp5l	NM_001127581
17679473	8.91194	8.27562	1.07689	0.0116144	Serpinb2	NM_021696
17827210	6.20311	5.7597	1.07698	0.00518027	Appl2	NM_001108741
17814873	7.98088	7.41027	1.077	0.0374866	E2f6	NM_001100717
17682087	6.98226	6.48273	1.07705	0.0279803	Pex19	NM_001134777
17881093	5.98873	5.55981	1.07715	0.0301218	Eid2b	XR_590109
17609349	6.53647	6.06803	1.0772	0.0426658	---	---
17646924	6.58116	6.10946	1.07721	0.0382393	Myh2	NM_001135157
17870159	7.01863	6.51511	1.07728	0.0255108	---	XR_349441
17629590	7.68436	7.13277	1.07733	0.0395371	Suv420h2	NM_001107475
17642133	8.97683	8.33221	1.07736	0.0345716	Pik3ap1	NM_001106368
17822902	7.5985	7.05269	1.07739	0.0127262	---	---
17718628	8.10862	7.52613	1.0774	0.0475736	Ninj1	NM_012867
17754230	5.70542	5.29548	1.07741	0.00695724	Lrrc3	NM_145679
17731946	8.18557	7.59721	1.07744	0.0255579	---	---
17656010	6.62902	6.15238	1.07747	0.0265684	Jade2	NM_001106998
17791400	6.17532	5.73127	1.07748	0.0180347	LOC100912608	XM_006236522
17675764	7.08339	6.57358	1.07755	0.0444352	Zfp498	NM_001108851
17623292	5.34801	4.9629	1.0776	0.019218	LOC499306	NM_001024291
17835285	7.0638	6.55429	1.07774	0.0117288	Vezt	NM_001006984
17621203	6.203	5.75492	1.07786	0.0320702	Slc5a2	NM_022590
17804352	5.38	4.99131	1.07787	0.0486671	Ctnnbip1	NM_001173388
17808785	7.53275	6.98806	1.07795	0.00967845	Dock7	NM_001191574
17814972	7.8689	7.29982	1.07796	0.0251308	Asap2	XM_008764624
17733052	7.87212	7.30247	1.07801	0.0129245	Fhod1	NM_001191600
17850083	7.03567	6.52627	1.07805	0.0314836	Fbxl12	NM_001025700
17816586	7.20501	6.6832	1.07808	0.0197562	Slc38a6	NM_001013099
17831937	8.80264	8.16496	1.0781	0.0460299	Tmem117	NM_001271239
17609957	6.40431	5.9403	1.07811	0.0395478	---	---
17834210	7.98594	7.40728	1.07812	0.0451019	Akap8l	NM_001013946
17790401	8.22524	7.62922	1.07812	0.000459805	Podxl	NM_138848
17603181	6.36938	5.90747	1.07819	0.0260332	---	---
17849437	7.87273	7.30087	1.07833	0.0156202	Yap1	NM_001034002
17670303	5.26922	4.88646	1.07833	0.0416656	RGD1560559	XM_001058776
17620486	6.11736	5.67273	1.07838	0.0215435	---	---
17761414	8.3567	7.7493	1.07838	0.0432593	Pomt1	NM_053406
17641711	4.69822	4.35671	1.07839	0.0419325	---	ENSRNOT00000083473
17740143	6.14709	5.70018	1.0784	0.0489231	Pmvk	NM_001008352
17643741	6.09331	5.6502	1.07842	0.0063448	Nagpa	NM_001108265
17821373	5.54786	5.14441	1.07843	0.00585665	---	AJ601385
17680051	6.42501	5.95767	1.07844	0.00864729	Klhdc8a	NM_001100683
17648576	6.86748	6.36773	1.07848	0.00881521	Scarf1	NM_001107022
17606117	6.90545	6.40203	1.07863	0.0390232	---	---
17624453	5.79659	5.37396	1.07865	0.0136292	Trpm6	XM_006223666
17671449	6.95163	6.44469	1.07866	0.0192446	N4bp2l1	NM_001035222
17729348	6.97587	6.46704	1.07868	0.00133874	Elmo3	NM_001030028
17792693	5.7496	5.33019	1.07869	0.0276909	Paip2b	XM_001073206
17652560	7.74319	7.17811	1.07872	0.0463136	Tmem104	NM_001191655
17685719	6.16425	5.71402	1.07879	0.0380344	Brinp2	NM_173115
17696224	8.69087	8.05604	1.0788	0.0438798	Tns3	NM_001170459
17851994	7.85184	7.27808	1.07883	0.0142604	Il10ra	NM_057193
17627246	8.93207	8.27855	1.07894	0.0118511	Utrn	NM_013070
17764288	7.2563	6.72535	1.07895	0.0321418	Pamr1	NM_001107755
17770641	7.93149	7.351	1.07897	0.0179283	Sec16a	NM_001276417
17745945	7.21936	6.69093	1.07898	0.0483541	Pdzd2	NM_022940
17847293	8.22809	7.62513	1.07908	0.00480155	Dusp7	NM_001100547
17610961	6.05689	5.61297	1.07909	0.0424555	Tmem200a	NM_001109135
17810910	5.60846	5.19725	1.07912	0.0084517	RGD1562036	XM_001062262
17757976	6.06741	5.62245	1.07914	0.0350274	Rab36	NM_001109589
17784742	7.06633	6.54802	1.07916	0.0314943	Lbx2	NM_001109244
17859318	7.19154	6.664	1.07916	0.0470041	Spats2l	NM_001014102
17699557	4.857	4.5005	1.07922	0.00692461	Sox7	NM_001106045
17653907	9.18334	8.50923	1.07922	0.0294746	Mgrn1	NM_001013964
17783399	6.83067	6.32922	1.07923	0.00214202	Gimap8	NM_001033923
17668323	7.22903	6.6981	1.07927	0.00901886	C2cd2	NM_199391
17755422	7.18453	6.65684	1.07927	0.02968	Lama4	NM_001309447
17627510	7.69475	7.12954	1.07928	0.0333665	Slc35d3	NM_001107522
17784430	7.49337	6.94254	1.07934	0.0452942	Polr1a	NM_031772
17825097	10.8769	10.0771	1.07936	0.0130961	---	ENSRNOT00000078672
17710722	7.10596	6.58306	1.07943	0.0312065	Ano8	XM_006252965
17771225	5.90921	5.47418	1.07947	0.0168579	Fibcd1	NM_001107829
17729308	5.16231	4.78194	1.07954	0.01787	Fbxl8	NM_001109128
17846210	6.41176	5.93922	1.07956	0.0118832	Myo6	XM_001061392
17840809	5.75569	5.33111	1.07964	0.0398484	---	NONRATT060008
17649989	7.92255	7.33777	1.07969	0.0425175	Mtmr4	NM_001105827
17743558	5.76478	5.33915	1.07972	0.033532	---	---
17623580	5.5558	5.14554	1.07973	0.00850517	Macrod1	NM_139337
17709258	6.81582	6.31236	1.07976	0.0331557	Dcun1d2	NM_001134798
17601075	6.87759	6.36936	1.07979	0.0266329	---	---
17601409	6.87759	6.36936	1.07979	0.0266329	---	---
17707810	5.78264	5.35519	1.07982	0.0466427	Wwc2	NM_001109111
17768890	8.34215	7.72492	1.0799	0.0175357	---	NONRATT036298
17730835	6.76301	6.26259	1.07991	0.0291096	Spg7	NM_181388
17800268	6.40975	5.93528	1.07994	0.000601664	Pde4b	NM_017031
17871406	5.6968	5.27509	1.07994	0.0350107	Amot	XM_006227504
17625569	6.46957	5.99023	1.08002	0.0369867	Ccnj	NM_001106369
17639611	5.37905	4.98048	1.08003	0.0160453	LOC102551929	XM_008760200
17706415	5.12604	4.74599	1.08008	0.03981	Frmpd2	XM_008771103
17823726	6.99931	6.48023	1.0801	0.0295135	Nrde2	XM_001064833
17875773	9.90568	9.17036	1.08018	0.0324096	---	---
17671916	6.69525	6.19791	1.08024	0.0320862	Olr1572	XM_008759142
17658054	10.3591	9.58951	1.08025	0.0177014	Alox12	NM_001105798
17883664	4.70842	4.35861	1.08026	0.0235549	---	---
17811090	6.11477	5.66005	1.08034	0.0133732	Gpatch3	XM_001065500
17809614	6.75489	6.25238	1.08037	0.0194388	Btbd19	XM_002726581
17653607	7.37665	6.82786	1.08037	0.0356574	Snx29	NM_001109526
17687788	7.39852	6.84773	1.08043	0.0404174	Cr2	NM_001105989
17785965	8.22187	7.60899	1.08055	0.0389784	Mtmr14	NM_001107880
17878106	6.9059	6.39077	1.08061	0.0300636	Zmym3	NM_001040155
17722336	5.69869	5.27356	1.08062	0.0246285	LOC100363294	NM_001270416
17664786	7.68244	7.10919	1.08064	0.0281447	Dopey2	NM_001191660
17790284	8.39156	7.76495	1.0807	0.035508	N5	NM_022857
17616459	6.35323	5.87842	1.08077	0.044122	Car11	NM_175708
17674315	6.65575	6.15772	1.08088	0.0182756	---	---
17602725	7.37085	6.81876	1.08097	0.0423526	---	---
17777482	6.49118	6.00452	1.08105	0.00548696	LOC103691893	XM_008762243
17733023	7.02788	6.50092	1.08106	0.0460642	Exoc3l1	NM_001106178
17753937	8.56148	7.9195	1.08106	0.00557081	Abcg1	NM_053502
17820861	7.43482	6.87729	1.08107	0.0151192	RGD1559683	NM_001109275
17789452	5.99308	5.54305	1.08119	0.00373219	---	GENSCAN00000002304
17734841	6.0468	5.59257	1.08122	0.0193611	Pcsk1	NM_017091
17721315	6.76709	6.2585	1.08126	0.0496885	F8	NM_183331
17831496	6.0165	5.56431	1.08127	0.0329553	Fam19a5	NM_001191991
17739583	7.83634	7.24698	1.08132	0.0272797	Etv3	NM_001106450
17793829	6.18264	5.71722	1.08141	0.0435023	Rpusd3	NM_001108641
17836083	7.31851	6.76758	1.08141	0.0401892	Dyrk2	NM_001108100
17861249	5.41021	5.0028	1.08144	0.0366608	Neu2	NM_017130
17802816	8.38126	7.74948	1.08153	0.0240783	Smpdl3b	NM_001025737
17834241	7.10306	6.56735	1.08157	0.0373473	Rasal3	NM_001134562
17828407	5.90733	5.46178	1.08158	0.00315143	---	NONRATT049641
17705657	10.1025	9.34006	1.08163	0.00743956	Ppif	NM_172243
17825108	9.62398	8.89755	1.08164	0.0478267	---	GENSCAN00000054392
17764236	4.62396	4.27458	1.08173	0.0367724	---	ENSRNOT00000079321
17856971	5.22354	4.82877	1.08175	0.0350303	RGD1559808	XM_001065275
17780007	5.88788	5.44281	1.08177	0.0100427	Gata5	NM_001024316
17632774	5.38455	4.97749	1.08178	0.0111536	Dkkl1	NM_001109145
17796076	5.08616	4.70148	1.08182	0.027756	---	---
17631853	8.34978	7.718	1.08186	0.0370751	Gramd1a	NM_001014160
17831999	7.14953	6.60821	1.08192	0.0439622	Pced1b	NM_001039454
17822953	6.3645	5.88244	1.08195	0.00686265	RGD1559921	ENSRNOT00000008621
17795302	5.97489	5.52231	1.08195	0.0160107	Klrb1a	NM_001010964
17854322	7.35298	6.79525	1.08208	0.0238189	Hmgn3	NM_001007020
17640072	7.72033	7.13461	1.0821	0.0447963	---	---
17752386	3.30584	3.05502	1.0821	0.0474682	---	ENSRNOT00000087821
17749728	7.74219	7.15469	1.08211	0.033413	Pde4dip	NM_022382
17755038	6.52792	6.03239	1.08214	0.0283541	Tysnd1	NM_001108932
17603083	5.72173	5.28685	1.08226	0.044286	---	---
17694823	6.40528	5.91843	1.08226	0.00437586	Slit2	NM_022632
17724896	6.1168	5.65179	1.08228	0.0379155	Zfp521	NM_001107403
17603969	5.40152	4.99069	1.08232	0.0291776	---	---
17854403	6.23041	5.75633	1.08236	0.0112452	Ube3d	NM_001039610
17698319	6.23249	5.75816	1.08237	0.0174285	---	ENSRNOT00000072888
17641253	7.49004	6.91956	1.08244	0.0363459	Fam189a2	XM_001078764
17684571	7.35747	6.7968	1.08249	0.00338596	Nav1	XM_003751240
17705363	7.33303	6.77384	1.08255	0.00282886	Dock9	NM_001105759
17839248	7.19992	6.65085	1.08256	0.0161432	Pdgfb	NM_031524
17608673	7.50072	6.9287	1.08256	0.0279858	---	---
17603179	7.52981	6.95505	1.08264	0.035045	---	---
17804012	5.66747	5.23484	1.08265	0.00444944	Pramef5	XM_006225654
17613089	6.09042	5.62509	1.08272	0.026691	Hspbp1	NM_139261
17863770	6.25836	5.7798	1.0828	0.0296232	Neurl3	NM_001014100
17855826	7.13796	6.59211	1.0828	0.0459763	Trex1	NM_001024989
17643242	4.63522	4.28073	1.08281	0.0176434	---	ENSRNOT00000077834
17619369	7.18324	6.6338	1.08282	0.038472	Ppfibp2	NM_001100582
17755807	5.32738	4.9197	1.08287	0.0312513	Bves	NM_001077590
17880629	7.15423	6.60671	1.08287	0.0476276	Mcts2	XM_006224707
17705578	5.4424	5.02583	1.08289	0.019153	Ipo5	XM_001075101
17757111	5.75545	5.31491	1.08289	0.00690831	Spdef	NM_001109530
17855912	5.86953	5.41997	1.08295	0.0129288	Ptpn23	NM_057204
17804547	6.14608	5.6753	1.08295	0.00194288	Tnfrsf25	NM_001137644
17606627	7.44763	6.87707	1.08297	0.0105759	---	---
17607271	7.44763	6.87707	1.08297	0.0105759	---	---
17817003	6.13651	5.66631	1.08298	0.0218806	Rad51b	XM_008764870
17604301	6.68	6.16809	1.08299	0.0332706	---	---
17819529	5.14634	4.75158	1.08308	0.0414683	Sp8	NM_001191774
17882257	5.81426	5.36821	1.08309	0.0035703	---	XM_008768498
17732686	6.58078	6.07553	1.08316	0.0297382	Adgrl1	NM_022962
17745616	8.24041	7.60772	1.08316	0.0305745	Ptger4	NM_032076
17629602	5.96018	5.5021	1.08326	0.00250227	Brsk1	NM_001127337
17665865	8.76882	8.0943	1.08333	0.0369359	Pla1a	NM_138882
17626561	8.95845	8.26878	1.08341	0.00129523	Tcf7l2	XM_008760555
17871271	6.92724	6.39359	1.08347	0.023596	Clcn5	NM_017106
17702668	6.66591	6.15212	1.08351	0.0478809	RGD1565222	NM_001109101
17676012	4.94237	4.56132	1.08354	0.00775214	---	GENSCAN00000036104
17820735	5.44437	5.02448	1.08357	0.0466182	Tcf23	XM_001067558
17761258	6.15293	5.67828	1.08359	0.00623101	Prdm12	XM_001067974
17778388	7.64623	7.05624	1.08361	0.0238211	Nol4l	XM_008762397
17791390	6.17476	5.6983	1.08361	0.00896579	Hoxa7	NM_001109233
17757367	6.71273	6.19433	1.08369	0.00315557	Btbd9	NM_001013073
17744450	7.33458	6.7677	1.08376	0.0022334	---	ENSRNOT00000088791
17646017	7.16512	6.61128	1.08377	0.0234022	---	ENSRNOT00000081000
17654185	8.32486	7.68134	1.08378	0.0397273	Paqr4	NM_001017377
17719468	6.17971	5.70183	1.08381	0.00126988	Hist1h2aa	NM_021839
17668426	6.26004	5.77594	1.08381	0.0165163	Dcbld2	NM_130419
17674846	6.92867	6.39257	1.08386	0.0439087	Noc4l	NM_001014129
17708130	6.94216	6.40501	1.08386	0.00115797	Mtmr7	NM_001107312
17851673	8.31391	7.67056	1.08387	0.00900614	Pdzd3	NM_001191996
17812155	6.44962	5.95006	1.08396	0.00404284	Ctrc	NM_001077649
17826402	6.27716	5.79057	1.08403	0.0213013	Mex3d	XM_006225940
17827650	6.67154	6.15433	1.08404	0.0139026	Fgd6	NM_001137645
17602431	7.0882	6.53811	1.08414	0.00806387	---	---
17621115	8.78242	8.10083	1.08414	0.0137084	Itgax	XM_001080404
17601043	5.96353	5.50067	1.08415	0.00996264	---	---
17601377	5.96353	5.50067	1.08415	0.00996264	---	---
17791428	7.59579	7.00601	1.08418	0.00303209	Jazf1	XM_001065610
17881941	5.80619	5.35515	1.08422	0.0402792	---	XM_006227052
17705574	5.03848	4.64677	1.0843	0.0260976	Spert	NM_001017506
17715330	8.25578	7.61371	1.08433	0.0497026	---	NONRATT024133
17600967	6.48445	5.98005	1.08435	0.0418888	---	---
17601301	6.48445	5.98005	1.08435	0.0418888	---	---
17846017	6.46596	5.96273	1.0844	0.0189293	Lysmd2	NM_001106839
17652661	5.32482	4.91036	1.08441	0.0410973	---	ENSRNOT00000080472
17754746	6.80423	6.27462	1.08441	0.0407453	---	NM_001107626
17676884	6.67674	6.15686	1.08444	0.00977427	Rasa4	XM_002724809
17644090	7.49583	6.91181	1.0845	0.0289046	Pkmyt1	NM_001105766
17684052	8.07797	7.44846	1.08452	0.0193237	Ikbke	NM_001108854
17720606	9.71959	8.96212	1.08452	0.00286331	Prkcq	NM_001276721
17882241	6.55254	6.04168	1.08456	0.0308861	---	XM_006221040
17700676	5.65311	5.2122	1.08459	0.0355666	---	ENSRNOT00000088088
17768522	8.04615	7.41853	1.0846	0.0465367	Plcg1	NM_013187
17837642	6.93363	6.3927	1.08462	0.0454058	---	ENSRNOT00000091870
17780385	7.21782	6.65444	1.08466	0.048355	Xrcc2	NM_001109215
17777184	6.57381	6.06066	1.08467	0.0277123	Il1a	NM_017019
17811128	7.18452	6.62354	1.08469	0.0401565	Map3k6	NM_001107909
17605301	8.231	7.58804	1.08473	0.0343592	---	---
17873704	5.91164	5.44984	1.08474	0.0107477	H2afb3	NM_001106969
17605325	6.40762	5.90707	1.08474	0.0201362	---	---
17733947	7.37672	6.80043	1.08474	0.0456149	Hsdl1	NM_001024896
17832932	6.47601	5.97006	1.08475	0.0218075	Myl6b	ENSRNOT00000048453
17636248	8.66331	7.98643	1.08475	0.0350804	Mrvi1	NM_001105210
17725346	6.37881	5.88032	1.08477	0.0388028	LOC498836	NM_001047935
17733042	5.88935	5.42909	1.08478	0.0131769	Lrrc29	NM_001195616
17744118	6.5342	6.02333	1.08482	0.015163	Atg10	NM_001109505
17858512	7.67213	7.07224	1.08482	0.0037129	Inpp4a	NM_031002
17603477	7.21615	6.65051	1.08505	0.002316	---	---
17812893	5.38229	4.9602	1.0851	0.0363304	Slc45a1	NM_144747
17714096	7.32687	6.75223	1.0851	0.0190414	Golm1	XM_001056825
17775102	7.93693	7.31444	1.0851	0.02092	Tcp11l1	NM_001109202
17691019	7.47598	6.88941	1.08514	0.0496285	Morc2	NM_001106016
17666120	8.56685	7.89447	1.08517	0.0152491	Kalrn	NM_032062
17752836	9.38307	8.64576	1.08528	0.00439924	G6b	NM_001003976
17757374	7.28015	6.70774	1.08534	0.0216596	Btbd9	NM_001013073
17744403	6.86444	6.3241	1.08544	0.0266867	---	---
17815220	7.7265	7.11789	1.0855	0.0111539	Pxdn	NM_001271261
17783353	5.18802	4.77936	1.08551	0.0220715	Zfp862	XM_008762932
17698012	6.14765	5.66331	1.08552	0.00982114	Peli2	NM_001107259
17675202	6.94746	6.39995	1.08555	0.0124362	Camsap3	NM_001144840
17798754	6.69672	6.16892	1.08556	0.00331728	---	GENSCAN00000015344
17672677	9.28299	8.55114	1.08559	0.0124929	Pilra	XM_008758270
17748916	7.11649	6.55529	1.08561	0.0429317	Flad1	NM_001110138
17862561	10.0084	9.21891	1.08564	0.0270292	Treml1	ENSRNOT00000018138
17856549	7.77194	7.15885	1.08564	0.0458016	Cx3cr1	NM_133534
17802483	5.66644	5.21943	1.08564	0.034925	Adgrb2	NM_001107914
17683403	6.87737	6.3347	1.08567	0.00583309	Rnf152	NM_001106305
17790525	5.96544	5.49439	1.08573	0.00223487	RGD1565367	NM_001270038
17604123	5.5063	5.07118	1.0858	0.0454375	---	---
17666795	8.74881	8.05732	1.08582	0.0249182	Alg3	NM_001142363
17653390	7.41682	6.83056	1.08583	0.00472117	Hexdc	NM_001142562
17648370	4.85065	4.46716	1.08585	0.012189	Olr1512	NM_001001350
17851813	6.08816	5.6068	1.08585	0.0128597	Upk2	NM_001109523
17819187	8.9577	8.24925	1.08588	0.0412029	Pld4	NM_001126288
17855374	6.30187	5.80346	1.08588	0.0476408	Parp3	NM_001008328
17724296	8.868	8.16659	1.08589	0.0235113	Dym	NM_001106133
17623687	6.96472	6.41342	1.08596	0.0440234	---	ENSRNOT00000082766
17646042	5.52276	5.08506	1.08608	0.0143189	---	ENSRNOT00000053294
17809726	5.24986	4.83362	1.08611	0.0164401	Klf17	XM_001072022
17766899	7.99369	7.35981	1.08613	0.0260258	Slc24a3	NM_053505
17734111	5.98013	5.50575	1.08616	0.00249812	Mvd	NM_031062
17686678	8.0571	7.41708	1.08629	0.0173743	Slamf7	NM_001191550
17602777	7.62876	7.02244	1.08634	0.040412	---	---
17756437	8.46066	7.78808	1.08636	0.0223346	Ly6g6c	NM_001001969
17826650	5.17493	4.76312	1.08646	0.0258529	Mier2	NM_001108737
17764506	6.26158	5.7631	1.0865	0.0423059	Mpped2	NM_198778
17627628	6.55453	6.03252	1.08653	0.0232729	Samd3	NM_001172116
17698658	5.20695	4.79223	1.08654	0.0140782	Rem2	NM_022685
17779773	7.95814	7.32428	1.08654	0.0331697	Zbp1	NM_133564
17882167	7.1679	6.59692	1.08655	0.0443878	---	NM_001100805
17604687	6.08356	5.5985	1.08664	0.00060308	---	---
17867856	8.14747	7.4975	1.08669	0.0152718	Safb2	NM_001303144
17681948	7.88597	7.25667	1.08672	0.0182379	F11r	NM_053796
17600179	5.73279	5.27496	1.08679	0.0275525	---	---
17830985	5.66203	5.20972	1.08682	0.0426001	Tef	NM_019194
17866272	7.78249	7.16071	1.08683	0.00633306	Usp40	NM_001134885
17768194	7.94398	7.30919	1.08685	0.00979453	Dlgap4	NM_173145
17637329	7.10582	6.53792	1.08686	0.0459552	Mvp	NM_022715
17822865	7.59851	6.99122	1.08687	0.00298984	---	---
17609231	5.35597	4.92764	1.08692	0.00654165	---	---
17648700	9.1328	8.40235	1.08693	0.013011	Fam57a	XM_002727796
17791284	7.26313	6.6814	1.08707	0.0474725	Osbpl3	XM_001055606
17642382	6.90928	6.35583	1.08708	0.0458341	Pdzd7	NM_001106362
17666748	6.82548	6.27851	1.08712	0.0445197	RGD1562339	XM_001058431
17661230	5.90141	5.42849	1.08712	0.00276517	Krt13	NM_001004021
17881743	5.17994	4.76479	1.08713	0.0228743	---	---
17611983	7.59524	6.98626	1.08717	0.0152866	Pacrg	NM_001077677
17785298	8.39558	7.72216	1.08721	0.0225685	Gata2	NM_033442
17613753	5.73567	5.27556	1.08722	0.0173039	Pnmal1	NM_001108473
17606533	7.65317	7.03903	1.08725	0.012745	---	---
17881717	8.29727	7.63081	1.08734	0.0238742	---	---
17653825	5.93054	5.45413	1.08735	0.0247761	Alg1	NM_001108264
17603111	6.28519	5.77976	1.08745	0.00301495	---	---
17653093	7.85681	7.22476	1.08748	0.0444513	Rnf213	XM_008768493
17842384	5.30845	4.88138	1.08749	0.0295932	Icam5	NM_001172079
17860569	7.33177	6.74182	1.08751	0.0194458	Ankzf1	NM_001014219
17819214	8.10954	7.45685	1.08753	0.0481144	Pacs2	XM_006225889
17632602	5.07806	4.66931	1.08754	0.0151939	Cpt1c	NM_001034925
17754293	6.84209	6.2908	1.08763	0.0255796	Adarb1	NM_001111055
17753954	7.20798	6.62706	1.08766	0.0183157	Ubash3a	NM_001107620
17731941	8.11135	7.45731	1.0877	0.0345901	Fto	NM_001039713
17842696	4.99092	4.58838	1.08773	0.040311	---	GENSCAN00000017529
17853371	5.57773	5.12774	1.08776	0.00905038	Iqch	NM_001106830
17610448	6.9176	6.35945	1.08777	0.032355	Zc3h12d	NM_001107469
17621590	5.55327	5.10505	1.0878	0.0160523	---	---
17747294	7.54447	6.93541	1.08782	0.0124824	Maml3	NM_001107675
17624893	7.48741	6.88271	1.08786	0.0175154	Cd274	NM_001191954
17874388	6.45251	5.93131	1.08787	0.0385071	Slc25a14	NM_053501
17758784	6.58994	6.05758	1.08788	0.00775287	Fam184a	XM_003753483
17792628	6.61173	6.07729	1.08794	0.0273227	Dguok	NM_001106602
17838659	7.65836	7.03918	1.08796	0.024094	Cpsf1	NM_001130571
17868552	6.9782	6.41371	1.08801	0.00441812	Tmem37	NM_139095
17753426	6.29125	5.7823	1.08802	0.0228812	Uhrf1bp1	XM_002725844
17878089	9.27964	8.52809	1.08813	0.00411313	Il2rg	NM_080889
17882033	4.70316	4.32216	1.08815	0.0448095	---	NM_001101020
17608739	6.66418	6.1243	1.08815	0.0413396	---	---
17837316	7.35967	6.76328	1.08818	0.0300136	Enpp2	NM_057104
17765585	5.23532	4.81061	1.08829	0.0321777	Duox1	NM_153739
17856622	5.3636	4.9284	1.0883	0.0110928	Fam198a	XM_001078210
17600355	5.02685	4.61885	1.08833	0.00809677	---	---
17788587	5.31878	4.88669	1.08842	0.0125444	Slc4a2	NM_017048
17604617	6.24598	5.73848	1.08844	0.0416788	---	---
17697961	6.77075	6.22055	1.08845	0.0416841	---	ENSRNOT00000088547
17748135	8.90556	8.18174	1.08847	0.00606013	Rxfp1	NM_201417
17791192	6.10209	5.60604	1.08848	0.0115811	Zfp467	NM_001024327
17617724	6.80933	6.25574	1.08849	0.0134224	Zfp710	NM_001134563
17843467	6.65364	6.11237	1.08855	0.0315282	Bsx	NM_001191995
17723688	7.68022	7.05516	1.0886	0.0136052	Sh3tc2	XM_001059165
17845217	6.47101	5.94422	1.08862	0.0407239	Rasl12	NM_001108162
17623122	7.75579	7.1239	1.0887	0.0110705	Fibp	XM_006230701
17795515	6.87319	6.31302	1.08873	0.00324462	LOC497796	NM_001111310
17630961	5.59133	5.13555	1.08875	0.00954862	Map3k10	NM_001191621
17832476	7.79108	7.15592	1.08876	0.00415649	Nr4a1	NM_024388
17838879	7.7953	7.15978	1.08876	0.0384739	Apol3	NM_001277359
17868219	5.98682	5.49866	1.08878	0.00996075	---	---
17696597	7.92741	7.2809	1.08879	0.0115261	Ahsa2	NM_001107241
17644331	5.55169	5.0989	1.0888	0.0205816	Noxo1	NM_001106986
17744941	6.25139	5.74129	1.08885	0.00426393	Mast4	XM_008760713
17725090	7.32751	6.72789	1.08912	0.0173637	RGD1562080	XM_006254447
17656817	7.22884	6.63729	1.08912	0.0466529	Atpaf2	NM_001107006
17882347	7.43205	6.82371	1.08915	0.0137602	---	XM_001060914
17624366	5.49745	5.04731	1.08919	0.0249109	---	ENSRNOT00000064835
17769262	7.92032	7.27113	1.08928	0.0162787	Cass4	NM_001191744
17647306	6.6336	6.08979	1.0893	0.0423628	Slc25a35	NM_001109033
17651484	9.3173	8.55336	1.08931	0.0334251	G6pc3	NM_176077
17830218	8.17413	7.50369	1.08935	0.0016851	Hsf1	NM_024393
17618286	6.58719	6.04683	1.08936	0.0385121	Rab30	NM_001015012
17832697	6.97319	6.40077	1.08943	0.0209532	Tarbp2	NM_001034941
17737540	8.91728	8.1848	1.08949	0.019907	Tnik	NM_001106422
17658033	6.24964	5.73624	1.0895	0.0213442	Bcl6b	NM_001108279
17672018	7.64066	7.01294	1.08951	0.0171114	Card11	XM_008758980
17848988	6.08637	5.5863	1.08952	0.020371	Vipr1	NM_012685
17787538	7.84921	7.20403	1.08956	0.0138734	Klrb1c	NM_001085403
17664138	6.90087	6.33318	1.08964	0.0446977	Ogfod3	NM_001013976
17634086	4.27478	3.92304	1.08966	0.0374057	---	---
17877980	8.73016	8.01166	1.08968	0.010816	Ophn1	NM_001107848
17760569	7.01929	6.44157	1.08969	0.0201121	Ralgds	NM_019250
17622904	6.23056	5.71743	1.08975	0.0491263	Pold4	NM_001013195
17744784	7.19125	6.59896	1.08976	0.00318873	Naip5	XM_001070842
17784049	5.22465	4.7942	1.08979	0.041435	Atoh1	NM_001109238
17806451	7.1753	6.58407	1.0898	0.0461758	Aptx	NM_148889
17878998	8.45721	7.7603	1.0898	0.00298173	Morc4	XM_001053814
17732022	7.94884	7.29362	1.08983	0.0169782	LOC100360478	XM_006222684
17828494	6.1874	5.67731	1.08985	0.0237999	RGD1565498	NM_001109287
17808222	5.80933	5.32999	1.08993	0.0350342	---	GENSCAN00000006433
17857086	7.49338	6.87443	1.09004	0.0159581	Rftn1	NM_001135011
17673102	7.43335	6.81929	1.09005	0.0351463	---	---
17621231	8.42474	7.72816	1.09014	0.00910992	Inpp5f	NM_001107554
17636095	5.09823	4.67637	1.09021	0.0439054	LOC499240	NM_001024287
17741788	8.47605	7.7745	1.09024	0.0067453	Kcna3	NM_019270
17668004	7.82304	7.17541	1.09026	0.0313771	Rcan1	NM_153724
17633785	7.01937	6.4382	1.09027	0.00434217	Lrrk1	NM_001191624
17881349	7.80255	7.15652	1.09027	0.0437758	---	NM_001271240
17864700	6.54105	5.99929	1.0903	0.0483664	Satb2	NM_001109306
17656760	6.3876	5.85851	1.09031	0.0332751	---	ENSRNOT00000077811
17704825	6.54997	6.00743	1.09031	0.00969672	Pcdh20	NM_001107280
17679264	6.74194	6.18347	1.09032	0.0395597	Abhd11	NM_001271180
17676622	7.20887	6.61147	1.09036	0.0192222	LOC681341	XM_006249059
17722736	5.69745	5.22481	1.09046	0.0325623	Pcdhgb5	XM_008772070
17810714	6.1137	5.60603	1.09056	0.00754798	Gja4	NM_021654
17680108	7.88308	7.22819	1.0906	0.0247706	Pik3c2b	NM_001105951
17734633	5.58212	5.11807	1.09067	0.0435408	Relb	XM_006223312
17797998	8.23537	7.55043	1.09072	0.00859591	Aco1	NM_017321
17666965	9.86694	9.04524	1.09084	0.00675512	Gp1bb	NM_053930
17675619	6.39782	5.86486	1.09087	0.00297933	Mtus2	NM_001100989
17728836	6.42054	5.88565	1.09088	0.0275322	Dcaf15	NM_001107162
17678383	6.98659	6.40449	1.09089	0.00827803	Tesc	XM_006249426
17871920	8.76353	8.03334	1.09089	0.0388119	Kdm5c	XM_001064297
17774733	7.34067	6.72865	1.09096	0.0375625	Ext2	NM_001107751
17880973	7.09553	6.50343	1.09104	0.0361852	Safb2	XR_589183
17772385	5.5826	5.11669	1.09106	0.0390528	Nr4a2	NM_019328
17611150	6.23515	5.7147	1.09107	0.0393595	Rnf217	NM_001106204
17830359	7.74019	7.09402	1.09109	0.0391515	RGD1309808	NM_001134801
17606161	5.35727	4.90934	1.09124	0.0202027	---	---
17881235	6.83415	6.26266	1.09125	0.0387824	---	RPTR-AY189981-1
17719674	9.00308	8.24907	1.09141	0.00963096	LOC100912942	XR_589462
17779286	9.23155	8.45686	1.09161	0.0176551	Pltp	NM_001168543
17748931	6.70482	6.14216	1.09161	0.0086584	Flad1	NM_001110138
17813036	6.31163	5.78157	1.09168	0.0318909	Hes3	NM_022687
17874468	6.26336	5.73721	1.09171	0.00752511	LOC103690901	XM_008758565
17643476	8.23293	7.54118	1.09173	0.00773837	LOC102550998	XM_006234663
17838937	5.89423	5.39858	1.09181	0.0220886	---	ENSRNOT00000088014
17872942	6.81378	6.24075	1.09182	0.0107116	Ar	NM_012502
17806807	6.71013	6.14552	1.09187	0.0483522	Tpm2	NM_001024345
17654595	6.70582	6.14157	1.09187	0.0232735	Eme2	XM_003750789
17810490	7.06603	6.47127	1.09191	0.00615354	Zc3h12a	NM_001077671
17764968	7.22852	6.61978	1.09196	0.0192357	Bahd1	XM_006224558
17600675	6.5839	6.02926	1.09199	0.00794593	---	---
17610189	6.5839	6.02926	1.09199	0.00794593	---	---
17806729	7.03255	6.44003	1.09201	0.0337751	Pigo	XM_001069442
17676366	6.89209	6.31118	1.09205	0.0290154	Dnaaf5	NM_001134857
17869572	5.47882	5.01683	1.09209	0.0332078	---	---
17706947	6.62773	6.06874	1.09211	0.0257336	Jak3	NM_012855
17683571	7.88715	7.22161	1.09216	0.0237805	LOC100359649	NR_037671
17778827	6.64007	6.0796	1.09219	0.0440424	Soga1	XM_001067659
17729157	8.24622	7.5498	1.09224	0.00807193	Arhgap10	NM_001109501
17819983	7.14868	6.54477	1.09227	0.0016443	Prepl	NM_001010951
17882445	10.3868	9.50873	1.09234	0.0150587	---	XM_001055765
17741919	7.05042	6.454	1.09241	0.042864	Psrc1	NM_001044302
17869355	8.04672	7.3659	1.09243	0.0385926	Ebi3	NM_001109421
17663401	7.07502	6.4764	1.09243	0.038423	Mrpl38	NM_001009369
17879692	6.80846	6.23225	1.09246	0.0473794	RGD1561481	XM_001067099
17627369	6.95916	6.37017	1.09246	0.0310167	Aig1	NM_001134425
17600109	6.6133	6.05342	1.09249	0.0381193	---	---
17779825	5.87664	5.3791	1.09249	0.0136813	---	ENSRNOT00000075547
17874446	6.3489	5.81088	1.09259	0.0154934	LOC103690902	XM_008758567
17765071	7.04831	6.45096	1.0926	0.00633886	Dll4	NM_001107760
17809971	8.87699	8.12416	1.09267	0.0227243	Mpl	XM_001072502
17604067	6.41313	5.86805	1.09289	0.0222976	---	---
17754422	4.85439	4.44176	1.0929	0.0491545	Ybey	NM_001108529
17769653	5.7703	5.27964	1.09294	0.0173482	Birc7	XM_008762598
17772632	6.14788	5.62508	1.09294	0.0278744	---	ENSRNOT00000091995
17767309	7.14208	6.53472	1.09294	0.035216	Slc52a3	NM_001037198
17812094	7.19477	6.58289	1.09295	0.0402727	Plekhm2	NM_001191767
17678658	4.77994	4.37342	1.09295	0.0296388	Msi1	NM_148890
17703114	5.71702	5.23073	1.09297	0.0375036	Sdr39u1	NM_001108378
17743645	6.30132	5.76533	1.09297	0.0128442	Negr1	NM_021682
17703064	6.17889	5.653	1.09303	0.00660267	Adcy4	NM_019285
17608685	6.49019	5.93769	1.09305	0.030061	---	---
17785264	11.0553	10.1142	1.09305	0.0104148	Gp9	NM_001031825
17673030	5.99293	5.48265	1.09307	0.016591	Cldn4	NM_001012022
17698694	4.86456	4.45013	1.09313	0.0201868	Cmtm5	NM_001106034
17602831	6.6565	6.08935	1.09314	0.0029044	---	---
17779669	5.91832	5.41402	1.09315	0.000895935	---	ENSRNOT00000086372
17813015	5.42737	4.96421	1.0933	0.0169759	Espn	NM_019622
17734724	6.30996	5.77134	1.09333	0.0163919	---	---
17665319	5.72028	5.23195	1.09334	0.0348253	---	ENSRNOT00000091706
17674897	6.2191	5.68786	1.0934	0.0104679	Pxmp2	NM_031587
17793125	7.59309	6.94431	1.09343	0.016805	Plxna1	XM_001072622
17870637	5.87299	5.37113	1.09344	0.0206937	Akap17b	XM_002730183
17673693	7.71667	7.05667	1.09353	0.0396761	Pitpnm2	NM_001107139
17760233	7.15091	6.53847	1.09367	0.0291894	Dph7	XR_344802
17881995	5.97861	5.46642	1.0937	0.0318153	---	NM_031063
17690533	6.62889	6.0603	1.09382	0.00092756	Wfs1	NM_031823
17681500	8.98357	8.21294	1.09383	0.0317687	Selp	NM_013114
17693376	5.94851	5.43804	1.09387	0.0436383	---	ENSRNOT00000077515
17604087	6.16628	5.63697	1.0939	0.0393664	---	---
17792569	7.58537	6.9339	1.09395	0.0277817	---	---
17701233	5.80556	5.30656	1.09403	0.0127775	Nkiras1	NM_001107252
17647775	5.514	5.04004	1.09404	0.00133839	Zmynd15	NM_001105800
17767328	7.73663	7.07154	1.09405	0.0193563	Tcf15	NM_001168579
17770806	6.51487	5.95459	1.09409	0.00324934	Surf4	ENSRNOT00000071754
17757344	5.42548	4.95884	1.0941	0.0108822	Mdga1	NM_001107618
17851448	6.41372	5.862	1.09412	0.0358472	---	---
17779457	8.11844	7.42001	1.09413	0.0359244	Sulf2	NM_001034927
17786063	5.3064	4.84988	1.09413	0.015871	Il17re	NM_001004091
17698315	6.56572	6.00082	1.09414	0.0288519	---	AB036696
17696484	6.41731	5.86516	1.09414	0.0237711	Cep68	XM_001059836
17731943	7.56135	6.91074	1.09415	0.0330567	---	---
17761038	5.91324	5.40421	1.09419	0.00228302	Ntmt1	NM_001025019
17882169	7.29555	6.66748	1.0942	0.0084521	---	NM_001100806
17860366	9.16673	8.37707	1.09426	0.00936293	Slc11a1	NM_001031658
17779303	7.21754	6.59549	1.09431	0.0241525	Zfp335	XM_008762559
17838727	7.71182	7.04682	1.09437	0.00903737	Tonsl	NM_001130572
17603265	6.01066	5.49188	1.09446	0.0121611	---	---
17718710	8.50174	7.76795	1.09446	0.00955634	Gmpr	NM_057188
17608679	7.05056	6.44133	1.09458	0.0254971	---	---
17861308	6.85506	6.26192	1.09472	0.0280858	---	ENSRNOT00000079897
17691403	7.73139	7.06229	1.09474	0.0118989	Zmiz2	NM_001100507
17611692	6.35808	5.80762	1.09478	0.0105914	Tulp4	NM_001109137
17822940	7.61973	6.95991	1.0948	0.0364739	Dcaf5	NM_001100718
17778890	7.30574	6.67307	1.09481	0.033044	Mroh8	XM_003753822
17830165	7.04292	6.43243	1.09491	0.0175483	Mroh1	NM_001103364
17709285	5.07196	4.63226	1.09492	0.0161855	---	ENSRNOT00000057740
17826613	5.72184	5.22534	1.09502	0.047481	---	---
17844512	5.82999	5.32387	1.09507	0.0203438	Rpp25	NM_001012124
17836451	6.9338	6.33085	1.09524	0.0310624	Dtx3	NM_001191989
17794580	7.99023	7.29469	1.09535	0.00302888	Phc1	NM_001107886
17870723	6.43299	5.87299	1.09535	0.038867	Syn1	NM_001110782
17817208	7.62352	6.95985	1.09536	0.0163543	Rgs6	NM_019342
17618514	5.14117	4.6936	1.09536	0.0385644	Gucy2d	NM_130737
17762755	4.97815	4.54445	1.09544	0.0406229	Sp5	NM_001106552
17660659	5.24966	4.79182	1.09555	0.00677181	Fbxo47	XM_008768201
17672539	8.58342	7.83431	1.09562	0.0249292	LOC103693629	XM_008769090
17714356	6.86389	6.26479	1.09563	0.0424405	Fam193b	NM_001170408
17628078	6.11999	5.58569	1.09566	0.00024049	LOC102556805	XR_598630
17681583	6.36928	5.81321	1.09566	0.0233312	Dpt	NM_001105965
17840950	7.81019	7.12736	1.0958	0.0328022	Tuba1a	NM_022298
17631385	8.44189	7.70361	1.09584	0.0248208	Kcnk6	NM_053806
17650686	6.64579	6.06452	1.09585	0.00666387	Mllt6	XM_006221022
17740192	7.1845	6.55603	1.09586	0.0221717	She	XM_001062249
17663172	5.77014	5.26525	1.09589	0.0308454	Hid1	NM_001304290
17615989	7.1178	6.49495	1.0959	0.0332392	Fv1	NM_001014018
17816328	7.1891	6.55962	1.09596	0.029995	Frmd6	NM_001271054
17600859	7.22907	6.59598	1.09598	0.0236791	---	---
17755499	6.05301	5.52291	1.09598	0.0187147	Traf3ip2	NM_001044248
17874224	6.25428	5.70641	1.09601	0.0382141	Mid2	NM_001191889
17850501	6.07212	5.54001	1.09605	0.00388854	Ecsit	NM_001006986
17874683	5.22147	4.76389	1.09605	0.0138857	Vgll1	XM_008758585
17619899	7.39129	6.74355	1.09605	0.00203032	---	---
17759401	6.67927	6.09361	1.09611	0.00481701	Prdm1	NM_001107639
17748526	6.89725	6.29237	1.09613	0.034236	Pear1	NM_001134959
17609485	4.25672	3.88339	1.09614	0.0272419	---	---
17755250	7.34987	6.70518	1.09615	0.025109	Dse	NM_001108933
17770315	7.26931	6.63144	1.09619	0.0299519	Traf2	NM_001107815
17656762	6.24281	5.69494	1.0962	0.032634	Rasd1	NM_001270954
17865068	7.77942	7.0958	1.09634	0.00535777	Plekhm3	XM_006226853
17790424	8.05246	7.34458	1.09638	0.000416719	Plxna4	XM_008762859
17771296	5.60454	5.11175	1.0964	0.0454572	Slc25a25	NM_145677
17743570	3.94442	3.59748	1.09644	0.0314947	---	ENSRNOT00000080764
17836999	8.10309	7.39037	1.09644	0.0240135	Klf10	NM_031135
17697355	5.33443	4.8652	1.09645	0.0204366	Cd99l2	NM_134459
17643819	6.7778	6.18128	1.0965	0.00607196	Anks3	NM_001009676
17727641	5.72828	5.2241	1.09651	0.00828007	Cmtm4	NM_001172151
17684738	5.27022	4.80607	1.09658	0.0131006	---	---
17670341	5.90108	5.3812	1.09661	0.0184059	Fam131a	XM_002727913
17630609	7.07871	6.45447	1.09671	0.00753492	Pou2f2	NM_001271204
17802685	6.85065	6.24646	1.09673	0.020946	Pigv	NM_001010966
17620655	5.24685	4.78403	1.09674	0.0419202	RGD1565363	XM_001079962
17802830	6.59923	6.01707	1.09675	0.00948192	Xkr8	NM_001012099
17833399	7.36358	6.71365	1.09681	0.0405405	Tbxa2r	NM_017054
17838872	8.08515	7.3709	1.0969	0.00934401	RGD1565356	XM_008765649
17875090	5.98134	5.45167	1.09716	0.00514396	---	ENSRNOT00000088324
17789285	7.20545	6.56725	1.09718	0.00139335	---	GENSCAN00000010705
17698159	5.56265	5.06992	1.09719	0.0447074	Slc39a2	NM_001107260
17732734	7.43406	6.77517	1.09725	0.0476523	Gipc1	NM_053341
17680270	5.53923	5.04783	1.09735	0.0497649	Myog	NM_017115
17811662	6.28046	5.72304	1.0974	0.02617	Zbtb40	NM_001191871
17731182	6.16212	5.61482	1.09748	0.0128732	Ntpcr	NM_001134573
17849010	5.04843	4.59996	1.09749	0.0223714	Ccdc13	XM_006226658
17840072	8.60092	7.83641	1.09756	0.0429196	Lmf2	NM_001079939
17635898	7.55116	6.87957	1.09762	0.00377663	LOC499229	XM_001075550
17854667	5.39342	4.91341	1.09769	0.0227697	LOC102550510	XR_348670
17643985	6.318	5.75505	1.09782	0.0362411	Slx4	XM_006220566
17839133	6.26971	5.71101	1.09783	0.00497665	Pla2g6	NM_001005560
17602713	6.56045	5.97502	1.09798	0.0236663	---	---
17829495	6.39902	5.82722	1.09813	0.00294462	Zhx2	NM_001271056
17754673	8.03355	7.31547	1.09816	0.00925942	---	ENSRNOT00000085952
17600827	6.23197	5.67448	1.09825	0.0472097	---	---
17698022	7.69035	7.00215	1.09828	0.0167919	Tmem260	NM_001170475
17768594	6.60567	6.01443	1.0983	0.0373616	L3mbtl1	XM_006224736
17787203	7.60124	6.92085	1.09831	0.0261352	Lpar5	XM_001063300
17640157	5.60117	5.09957	1.09836	0.0471809	RGD1308106	NM_001134575
17851954	6.6562	6.05925	1.09852	0.0258424	Cd3g	NM_001077646
17650607	6.44833	5.86994	1.09853	0.00222907	Osbpl7	NM_001107044
17677059	5.50269	5.00894	1.09857	0.013887	Stx1a	NM_053788
17844042	6.61892	6.02497	1.09858	0.00137553	Alg9	NM_001109000
17603527	6.42383	5.84732	1.09859	0.0111553	---	---
17604367	6.58654	5.99493	1.09868	0.0204905	---	---
17739798	6.50557	5.92109	1.09871	0.00460999	---	ENSRNOT00000079068
17857172	7.16807	6.52373	1.09877	0.00774605	Foxp4	NM_001108788
17633198	8.07642	7.35026	1.09879	0.0457822	---	ENSRNOT00000078692
17601077	7.54699	6.86834	1.09881	0.0164556	---	---
17601411	7.54699	6.86834	1.09881	0.0164556	---	---
17840136	7.18332	6.53712	1.09885	0.0129101	Chkb	NM_017177
17777579	6.38112	5.80697	1.09887	0.00516713	Lrrn4	XM_001081242
17756688	6.15662	5.60261	1.09888	0.0245642	Notch4	NM_001002827
17812547	7.54902	6.86876	1.09904	0.00698449	Clcn6	NM_001106479
17750476	7.00122	6.36996	1.0991	0.00940813	Ampd2	NM_001101681
17657885	5.10519	4.64465	1.09916	0.0433549	LOC497938	NM_001017475
17702438	5.81363	5.28918	1.09916	0.0125876	---	GENSCAN00000058645
17605985	5.12838	4.66566	1.09918	0.0410074	---	---
17600799	7.20477	6.55453	1.0992	0.00476791	---	---
17753610	7.39848	6.73059	1.09923	0.0247239	Brpf3	NM_001107615
17637507	5.16832	4.7016	1.09927	0.0305418	---	---
17868389	6.24729	5.68302	1.09929	0.0294121	LOC103690237	XR_594263
17710498	7.42875	6.75752	1.09933	0.0327092	LOC290595	NM_001106063
17882653	5.662	5.15012	1.09939	0.0238586	---	NM_183333
17879216	6.20374	5.64264	1.09944	0.0106565	LOC103690902	XM_008758567
17786100	7.28419	6.62527	1.09946	0.0298343	Creld1	NM_001024783
17788480	7.40308	6.73326	1.09948	0.0155677	LOC100910079	XM_006235966
17765931	9.64121	8.76882	1.09949	0.0187346	Dusp2	NM_001012089
17638382	6.88501	6.26197	1.0995	0.0313568	Slc25a22	NM_001014027
17882035	5.75058	5.23012	1.09951	0.0332246	---	NM_001101021
17663144	5.42329	4.93215	1.09958	0.0219712	Fdxr	NM_024153
17798022	5.74644	5.22577	1.09964	0.0114161	---	ENSRNOT00000091691
17753145	9.36459	8.51574	1.09968	0.0479017	RT1-Ba	NM_001008831
17864386	7.26819	6.60919	1.09971	0.0279015	Stat4	NM_001012226
17608351	5.69212	5.17598	1.09972	0.015674	---	---
17794985	6.95655	6.32569	1.09973	0.0434969	Tapbpl	NM_001106622
17703511	6.81678	6.19858	1.09973	0.00081842	Atp8a2	XM_003751492
17805429	5.17047	4.70154	1.09974	0.0339376	Mcmdc2	NM_001024340
17882629	5.98689	5.44363	1.0998	0.000898096	---	NM_001128193
17672304	6.87983	6.2555	1.0998	0.0331637	Dhrsx	NM_001105914
17765687	8.25232	7.50306	1.09986	0.0136202	Slc24a5	NM_001107769
17731830	5.40815	4.91709	1.09987	0.0380554	LOC102556781	XM_008760734
17683261	6.33782	5.76222	1.09989	0.00293947	Irf6	NM_001108859
17660565	4.74914	4.31765	1.09994	0.00904468	Gpr179	XM_008768197
17678723	7.30668	6.64211	1.10005	0.0363208	Oasl	NM_001009681
17614403	6.57408	5.97563	1.10015	0.018569	Megf8	NM_053628
17787306	9.32277	8.4741	1.10015	0.0237788	Vwf	NM_053889
17708013	6.06527	5.51294	1.10019	0.00631761	Klkb1	NM_012725
17695056	7.15143	6.49939	1.10032	0.00865686	Evc2	NM_001106012
17619907	8.27484	7.52016	1.10035	0.0350052	---	---
17670667	5.69923	5.17928	1.10039	0.0207906	Rtn4r	NM_053613
17608889	6.58368	5.98302	1.10039	0.0469416	---	---
17638514	6.28193	5.70877	1.1004	0.00345214	Dusp8	NM_001108510
17606097	5.54739	5.04125	1.1004	0.0251728	---	---
17768046	6.70715	6.09488	1.10046	0.0294045	Cep250	XM_008762449
17767902	5.69661	5.17604	1.10057	0.0400019	Asip	NM_052979
17798193	6.72463	6.10982	1.10063	0.00225573	Unc13b	NM_001042579
17787604	6.74412	6.12737	1.10065	0.037097	Klrd1	NM_012745
17847843	7.41341	6.73522	1.10069	0.0383127	Slc26a6	NM_001143817
17604357	6.48121	5.88811	1.10073	0.0309533	---	---
17616518	5.62139	5.10689	1.10075	0.0464754	Tmem143	NM_001107513
17795328	4.9577	4.50379	1.10078	0.0420996	LOC689757	NM_001101019
17882229	5.91043	5.36926	1.10079	0.0493701	---	NM_001271211
17806608	5.39897	4.9044	1.10084	0.0177631	Fam219a	NM_001109616
17609915	5.79148	5.26083	1.10087	0.0432221	---	---
17882183	6.83804	6.21086	1.10098	0.0377153	---	NM_001139492
17781998	7.82966	7.11131	1.10102	0.0121332	Ccdc136	XM_006224849
17866446	5.6057	5.09135	1.10103	0.032212	Hes6	NM_001013179
17727409	6.34267	5.7605	1.10106	0.0116385	Cndp1	NM_001007687
17655044	6.20739	5.63738	1.10111	0.0193752	Decr2	NM_171996
17605069	6.18831	5.61939	1.10124	0.0421207	---	---
17600099	7.13359	6.4775	1.10129	0.00772425	---	---
17617093	5.31975	4.83043	1.1013	0.0216297	LOC100365773	NM_001271493
17835345	7.79304	7.07581	1.10136	0.0218327	Socs2	NM_058208
17877004	6.40128	5.81186	1.10142	0.0233398	Piga	NM_001108816
17818321	8.76221	7.95515	1.10145	0.0203677	Evl	NM_024147
17608865	6.41811	5.8268	1.10148	0.0195143	---	---
17731949	8.14106	7.39064	1.10154	0.0186118	---	---
17821051	6.38933	5.80017	1.10158	0.0283661	Kcns3	NM_031778
17837036	5.56085	5.04786	1.10163	0.00940343	Dpys	NM_031705
17654204	5.72119	5.19292	1.10173	0.00983221	Flywch1	XM_001056224
17639006	6.90829	6.27023	1.10176	0.0125901	Lrp5	NM_001106321
17834736	5.99084	5.43731	1.1018	0.0399415	Eid3	NM_001044304
17847383	5.74489	5.21393	1.10183	0.0250818	Cish	NM_031804
17644881	6.71918	6.09769	1.10192	0.0323839	Sh3pxd2b	XM_006220627
17803723	6.03346	5.4746	1.10208	0.0244519	Iffo2	NM_001134703
17684505	5.71821	5.18826	1.10215	0.0210158	Shisa4	NM_001077826
17606725	6.15077	5.58026	1.10224	0.0163399	---	---
17798757	5.7467	5.21357	1.10226	0.0326448	Invs	NM_001107932
17833071	8.23673	7.47236	1.10229	0.00278699	Dgka	NM_080787
17857098	5.66023	5.13463	1.10236	0.0303016	Daam2	XM_006226766
17666218	7.47928	6.78473	1.10237	0.00588655	Rubcn	XM_001065343
17824403	7.01738	6.36541	1.10242	0.00457539	Cdc42bpb	NM_053620
17740956	6.09414	5.52735	1.10254	0.0278152	Sv2a	NM_057210
17691455	6.94288	6.29689	1.10259	0.0245305	Adcy1	NM_001107239
17604009	5.79641	5.25695	1.10262	0.0396811	---	---
17866195	6.13292	5.5617	1.10271	0.0179677	Nppc	NM_053750
17712437	5.01016	4.54327	1.10277	0.000120581	snRNA	ENSRNOT00000081241
17600021	6.6896	6.06618	1.10277	0.0242746	---	---
17607331	5.85358	5.30806	1.10277	0.01274	---	---
17828543	5.55785	5.0395	1.10286	0.0426198	Lrig3	XM_001055013
17695657	6.68007	6.05697	1.10287	0.0254048	Sfi1	NM_001191682
17879302	6.21481	5.63502	1.10289	0.00560741	LOC103694517	XM_008773575
17775597	5.37792	4.8762	1.10289	0.0268461	---	NONRATT037866
17811503	6.75974	6.12885	1.10294	0.0282886	Nipal3	XM_006239277
17809577	6.91436	6.26898	1.10295	0.0249988	Mmachc	NM_001107962
17749481	5.69746	5.16558	1.10297	0.0181637	Ecm1	NM_053882
17827113	5.87886	5.33003	1.10297	0.0236799	---	ENSRNOT00000090020
17760245	8.23953	7.47001	1.10301	0.0221378	Pnpla7	NM_144738
17621327	5.44112	4.93287	1.10303	0.0215361	Tacc2	NM_001004415
17779798	5.46312	4.9528	1.10304	0.0427375	Apcdd1l	XM_006224760
17880121	6.37626	5.78031	1.1031	0.0177968	Dmrtc1a	ENSRNOT00000074259
17838253	6.45842	5.85434	1.10318	0.0443716	Top1mt	NM_001002798
17766359	5.33686	4.83759	1.10321	0.0203145	---	ENSRNOT00000086857
17674510	5.47786	4.96526	1.10324	0.00132667	---	GENSCAN00000018884
17630188	6.67946	6.0542	1.10328	0.00918237	Qpctl	NM_001106230
17741483	7.99005	7.24209	1.10328	0.00850589	Dennd2c	NM_001191569
17623115	5.86527	5.31599	1.10333	0.0405674	Fosl1	NM_012953
17719076	6.37045	5.77384	1.10333	0.0217639	---	---
17622657	6.16492	5.58741	1.10336	0.00807309	Mrgprf	NM_153722
17864988	6.09946	5.52807	1.10336	0.0146934	---	ENSRNOT00000087417
17643356	5.12535	4.64499	1.10341	0.0456514	---	GENSCAN00000016959
17736724	4.17995	3.788	1.10347	0.00774358	---	GENSCAN00000017874
17797004	5.93022	5.37397	1.10351	0.0102137	Npbwr1	NM_001014784
17861833	7.72787	7.00297	1.10351	0.00259364	Farp2	NM_001108233
17602955	5.74613	5.20708	1.10352	0.0116144	---	---
17658826	6.34484	5.74952	1.10354	0.0420875	Sgk494	XM_006220734
17704951	7.10163	6.43528	1.10355	0.0061182	Tbc1d4	XM_003752837
17850232	6.74461	6.11152	1.10359	0.0133678	S1pr2	NM_017192
17742752	5.48044	4.96581	1.10364	0.0350205	---	NONRATT030354
17842750	6.30315	5.71104	1.10368	0.0491063	Eepd1	NM_001014088
17609571	6.39922	5.79808	1.10368	0.00346622	---	---
17841515	5.51757	4.99797	1.10396	0.0231938	Rarg	NM_001135249
17780480	7.00494	6.34508	1.104	0.0369402	Wdr86	NM_001110489
17703421	4.82757	4.37262	1.10404	0.00802061	LOC102550095	XR_595163
17606135	6.09535	5.52074	1.10408	0.0493465	---	---
17706032	7.22125	6.53997	1.10417	0.0344111	---	GENSCAN00000017132
17630332	9.55964	8.65773	1.10417	0.0378152	Apoe	NM_001270681
17707493	4.73744	4.29023	1.10424	0.0394056	Cpe	NM_013128
17876538	4.82588	4.36985	1.10436	0.0463454	Mir3552	NR_037329
17808587	4.85111	4.39256	1.10439	0.0314624	Elavl2	NM_001302217
17606075	5.47635	4.95863	1.10441	0.0126671	---	---
17744314	5.19216	4.70117	1.10444	0.042413	Bhmt2	NM_001014256
17731644	7.84755	7.10545	1.10444	0.0265943	Nlrc5	XM_001062196
17850719	5.23631	4.74071	1.10454	0.0152721	Jam3	NM_001004269
17600853	6.38162	5.77755	1.10456	0.0144099	---	---
17654292	6.01927	5.44916	1.10462	0.0451175	Amdhd2	NM_001024990
17631846	6.29663	5.70008	1.10466	0.00645015	Scn1b	NM_001271045
17824172	6.81639	6.17021	1.10472	0.0400382	Syne3	NM_001106762
17666765	7.09362	6.42107	1.10474	0.0351331	Clcn2	NM_017137
17633360	6.73765	6.09884	1.10474	0.0366345	LOC102552287	XR_350353
17604229	5.34967	4.84239	1.10476	0.0305023	---	---
17882685	5.53952	5.01406	1.1048	0.020506	---	NM_001015036
17706642	5.41196	4.89826	1.10487	0.00338352	Dydc1	XM_006222160
17720404	4.13965	3.74665	1.10489	0.00784185	LOC102550988	XM_008771799
17832070	5.99034	5.42117	1.10499	0.0338364	Olr1107	NM_001000424
17609795	6.33682	5.73415	1.1051	0.0348862	---	---
17763172	5.95116	5.38515	1.1051	0.0185532	Dfnb59	XM_006224498
17661171	4.79146	4.3354	1.10519	0.0382992	LOC102554371	XM_006220838
17605611	7.14047	6.46001	1.10533	0.00968911	---	---
17661049	5.42389	4.90675	1.10539	0.0123083	Krtap1-5	NM_001025135
17611421	5.16123	4.6687	1.1055	0.0051889	Iyd	NM_001025000
17697861	7.01142	6.34232	1.1055	0.00693674	Gpr137c	NM_001134541
17761716	6.52934	5.90568	1.1056	0.0336943	Avpi1	NM_134373
17635431	7.40869	6.70089	1.10563	0.0353294	Il18bp	NM_053374
17673587	7.55409	6.83179	1.10573	0.00768511	Ccdc92	NM_001083898
17753500	6.4634	5.84512	1.10578	0.0180831	Zfp523	NM_001134755
17806512	6.51262	5.88936	1.10583	0.0195855	Nol6	XM_006225241
17861624	6.7427	6.0971	1.10589	0.0302323	Fam132b	XM_001060107
17853768	5.74589	5.19536	1.10597	0.000433375	Foxb1	NM_001013248
17798143	6.14264	5.55396	1.10599	0.0211751	Galt	NM_001013089
[truncated: 1,188 more rows]

## Sheet: Female BPA0.5 vs Control female
Probe_ID	Female Control, FC (avg exp)	female BPA0.5, fBPA0.5 (avg exp)	fBPA0.5 vs FC (fold change)	fBPA0.5 vs FC (adj p-value)	Gene Symbol	mRNA Accession
17606647	0.893507	0.00350718	-254.765	0.0463861	---	---
17601129	3.29588	0.490965	-6.71306	0.000648974	---	---
17601463	3.29588	0.490965	-6.71306	0.000648974	---	---
17787085	1.59359	0.239222	-6.66158	0.0236752	---	---
17787084	1.62236	0.252729	-6.41936	0.0257108	---	---
17626893	2.06013	0.48827	-4.21924	0.00394509	Ces2i	XM_001074128
17816070	3.06638	0.911199	-3.36521	0.00931608	---	ENSRNOT00000077870
17761759	2.18743	0.796362	-2.74678	0.0211196	Olr398	NM_001000830
17851266	3.21269	1.23457	-2.60227	0.00798073	Olr1295	NM_001000598
17600951	3.44807	1.35505	-2.5446	0.046633	---	---
17601285	3.44807	1.35505	-2.5446	0.046633	---	---
17784277	2.36853	0.99982	-2.36895	0.00413646	---	ENSRNOT00000091902
17783183	1.75388	0.749941	-2.33869	0.018216	---	---
17846338	2.35013	1.01731	-2.31015	0.0215198	---	---
17875052	2.58111	1.12785	-2.28852	0.0309944	---	ENSRNOT00000087364
17607589	1.76114	0.799548	-2.20266	0.0259268	---	---
17609007	1.76114	0.799548	-2.20266	0.0259268	---	---
17754684	2.53529	1.15589	-2.19337	0.0217177	---	---
17879069	3.07797	1.44715	-2.12692	0.0101451	---	ENSRNOT00000089249
17602355	3.59623	1.73535	-2.07234	0.0453341	---	---
17713779	2.7266	1.33319	-2.04517	0.0487709	---	ENSRNOT00000078339
17600943	3.43137	1.68783	-2.033	0.0476903	---	---
17601277	3.43137	1.68783	-2.033	0.0476903	---	---
17602159	2.79743	1.38127	-2.02525	0.0451613	---	---
17607671	2.07634	1.03819	-1.99997	0.00992649	---	---
17609089	2.07634	1.03819	-1.99997	0.00992649	---	---
17602079	3.4472	1.76398	-1.95422	0.0214329	---	---
17608543	2.76387	1.50365	-1.83811	0.0248392	---	---
17615723	3.09974	1.68831	-1.836	0.0280456	Vom2r37	NM_001099487
17726146	2.20615	1.21492	-1.81587	0.0177356	---	ENSRNOT00000083944
17603723	5.11596	2.84578	-1.79773	0.0252731	---	---
17605299	3.6072	2.02571	-1.78071	0.0210637	---	---
17708049	2.58973	1.4637	-1.76931	0.0368196	---	ENSRNOT00000063768
17774262	2.53326	1.43526	-1.76502	0.0455937	Olr629	NM_001001058
17601167	2.37978	1.36749	-1.74025	0.0238981	---	---
17601501	2.37978	1.36749	-1.74025	0.0238981	---	---
17774146	2.91083	1.67928	-1.73338	0.0497179	Olr502	NM_001000311
17634810	2.27554	1.31467	-1.73088	0.02146	---	ENSRNOT00000081615
17653599	2.48635	1.46862	-1.69298	0.0198403	---	---
17606333	2.50445	1.55051	-1.61524	0.0218205	---	---
17834450	3.46704	2.15364	-1.60985	0.026864	Olr1096	NM_001000485
17602081	4.5048	2.82651	-1.59377	0.0132699	---	---
17801036	3.27334	2.06152	-1.58783	0.0338665	---	---
17608563	4.74483	3.08026	-1.5404	0.00907682	---	---
17610386	3.01021	1.95901	-1.5366	0.0453686	---	---
17723667	3.70524	2.41592	-1.53368	0.0104517	Mir3557	NR_037335
17816879	2.42214	1.58933	-1.524	0.0186946	---	ENSRNOT00000091438
17818447	2.75055	1.80635	-1.52271	0.0369594	---	ENSRNOT00000078011
17724855	3.25048	2.13763	-1.5206	0.0278086	---	ENSRNOT00000078301
17689278	2.45612	1.62908	-1.50768	0.0348579	---	ENSRNOT00000054495
17800491	3.32479	2.22018	-1.49753	6.42649e-05	Dhcr24	ENSRNOT00000081041
17606469	3.86547	2.60302	-1.48499	0.0164521	---	---
17620502	3.46491	2.33824	-1.48185	0.0380809	Aqp8	NM_019158
17730997	2.32724	1.57456	-1.47803	0.0254302	---	ENSRNOT00000087915
17609183	3.24678	2.2073	-1.47093	0.0318337	---	---
17604799	4.17888	2.84926	-1.46666	0.00338035	---	---
17655103	2.8524	1.95891	-1.45612	0.0485357	---	ENSRNOT00000092055
17731393	3.45222	2.3891	-1.44499	0.038527	---	ENSRNOT00000078411
17727712	2.93617	2.08444	-1.40862	0.00963855	LOC100910721	XM_003751828
17608495	4.25778	3.02566	-1.40722	0.0338396	---	---
17606589	2.48067	1.76779	-1.40327	0.0458197	---	---
17843235	3.71974	2.6621	-1.3973	0.0193641	Olr1203	NM_001001082
17617119	3.42271	2.47792	-1.38128	0.0185842	LOC308670	XR_590193
17608241	4.70715	3.42636	-1.37381	0.0101234	---	---
17609553	4.3176	3.14301	-1.37372	0.00920125	---	---
17737825	4.06304	2.96144	-1.37198	0.00520168	Sox2	XR_591019
17650228	3.86149	2.84362	-1.35795	0.0473814	---	GENSCAN00000010450
17623958	4.31782	3.18096	-1.35739	0.00212118	Best1	---
17639986	3.8954	2.87746	-1.35376	0.0214639	Tex40	XM_006223630
17712292	3.54071	2.61987	-1.35148	0.000508262	---	ENSRNOT00000090682
17607759	4.2583	3.15167	-1.35113	0.0397008	---	---
17609177	4.2583	3.15167	-1.35113	0.0397008	---	---
17742150	3.79985	2.82057	-1.3472	0.00104272	---	ENSRNOT00000078452
17606423	3.56593	2.64864	-1.34633	0.0282859	---	---
17705163	3.4615	2.57123	-1.34624	0.0499102	---	ENSRNOT00000077540
17626769	3.9116	2.93987	-1.33053	0.0336359	Pnliprp1	NM_032081
17806214	3.87363	2.91403	-1.3293	0.00595578	---	ENSRNOT00000086741
17766080	4.05214	3.05421	-1.32674	0.00246001	---	ENSRNOT00000079467
17827582	4.48166	3.37929	-1.32622	0.0132303	Hal	NM_017159
17842866	3.81956	2.88012	-1.32618	0.0239446	---	ENSRNOT00000078181
17881327	3.83813	2.90056	-1.32324	0.0267763	---	RPTR-X58791-1
17881275	3.83749	2.90232	-1.32221	0.027049	---	RPTR-M10961-2
17637274	3.88475	2.94136	-1.32073	0.00315842	RGD1563217	NM_001109155
17872523	3.64524	2.76029	-1.3206	0.0290186	---	ENSRNOT00000088455
17635594	4.03807	3.0674	-1.31645	0.0395188	Olr126	NM_001000158
17608591	4.65974	3.5494	-1.31283	0.0366367	---	---
17822571	2.97414	2.26569	-1.31268	0.0350471	---	ENSRNOT00000082651
17814399	3.30258	2.51691	-1.31216	0.0152883	---	---
17759824	2.7339	2.08729	-1.30978	0.0478016	---	ENSRNOT00000083940
17602873	4.73212	3.61481	-1.30909	0.0113708	---	---
17723779	4.01768	3.07602	-1.30613	0.0301704	St8sia3	ENSRNOT00000024752
17665384	3.08257	2.36306	-1.30449	0.0337826	---	---
17767085	4.41064	3.39449	-1.29935	0.0100775	Cst12	ENSRNOT00000006608
17607829	3.64526	2.80779	-1.29826	0.0137259	---	---
17607881	3.64526	2.80779	-1.29826	0.0137259	---	---
17799775	3.83679	2.96094	-1.2958	0.0395931	Mir3554	NR_037332
17792241	3.28333	2.54371	-1.29077	0.0435955	---	ENSRNOT00000090308
17702290	2.83839	2.2028	-1.28854	0.0129097	---	ENSRNOT00000084028
17602023	4.73815	3.69186	-1.2834	0.00703075	---	---
17645017	3.0935	2.41048	-1.28336	0.0374826	Mir218-2	NR_031930
17607645	4.10896	3.21342	-1.27869	0.0296467	---	---
17609063	4.10896	3.21342	-1.27869	0.0296467	---	---
17762013	2.82025	2.20611	-1.27838	0.0434946	---	ENSRNOT00000085498
17699417	4.10019	3.21239	-1.27637	0.0161453	C1qtnf9	NM_001191891
17648343	3.47581	2.74094	-1.26811	0.0432894	Olr1493	NM_001006609
17605427	3.55661	2.80794	-1.26663	0.0376225	---	---
17711142	3.5368	2.79614	-1.26489	0.0320869	---	ENSRNOT00000089247
17687925	3.13534	2.47943	-1.26454	0.0391596	Cplx1	NM_022864
17817130	3.99032	3.15654	-1.26414	0.028344	Ttc9	NM_001134731
17604579	5.4278	4.29974	-1.26236	0.0102196	---	---
17832370	5.82845	4.6304	-1.25874	0.00496546	---	---
17806938	4.07093	3.24661	-1.2539	0.00473335	Olr833	NM_001000408
17715242	4.32762	3.45342	-1.25314	0.0134236	---	---
17711206	3.48002	2.77761	-1.25288	0.0149146	---	ENSRNOT00000082168
17648488	4.05242	3.23486	-1.25273	0.0143121	Mir212	NR_031925
17602405	4.90171	3.9151	-1.252	0.046026	---	---
17878972	3.29007	2.63696	-1.24767	0.032623	---	ENSRNOT00000078141
17856378	4.15057	3.33136	-1.24591	0.0372583	Slc22a13	NM_001126285
17872922	4.44236	3.57146	-1.24385	0.0421404	Pgr15l	NM_001106583
17850316	4.50767	3.62498	-1.2435	0.00456343	Ap1m2	NM_001108996
17835652	4.52298	3.63886	-1.24297	0.0289487	---	---
17635673	4.49146	3.6172	-1.24169	0.0408875	Olr150	NM_001000739
17843294	3.65649	2.94902	-1.2399	0.0364927	Olr1239	NM_001000811
17831482	4.72338	3.81437	-1.23831	0.0338567	RGD1560617	ENSRNOT00000038168
17614763	3.9414	3.18822	-1.23624	0.0325124	---	---
17602013	5.28563	4.28554	-1.23336	0.0158118	---	---
17718732	3.14506	2.55328	-1.23177	0.0398339	---	GENSCAN00000054668
17628551	3.54702	2.88624	-1.22894	0.040312	---	---
17782679	4.5973	3.74138	-1.22877	0.00836953	Tas2r137	NM_001025149
17850020	3.34743	2.72781	-1.22715	0.0245979	---	ENSRNOT00000080890
17795801	4.1121	3.35122	-1.22705	0.0222706	Tas2r103	NM_001166690
17601737	4.76363	3.88474	-1.22624	0.0363701	---	---
17791554	4.05922	3.3155	-1.22432	0.0189689	Neurod6	NM_001109237
17830066	4.51953	3.69505	-1.22313	0.0471205	Spatc1	NM_001115026
17600419	3.62902	2.97329	-1.22054	0.0347721	---	---
17707651	4.26722	3.50501	-1.21746	0.0482107	---	ENSRNOT00000088567
17880505	3.89526	3.21011	-1.21343	0.0492266	RGD1565369	XM_001053809
17785460	3.86189	3.18398	-1.21291	0.00120542	---	ENSRNOT00000082834
17612978	3.98757	3.289	-1.2124	0.0398862	Vom1r38	NM_001008964
17877013	4.48751	3.70473	-1.21129	0.0117991	Figf	NM_031761
17700468	4.33607	3.58176	-1.2106	0.0140246	---	ENSRNOT00000087480
17831711	5.7036	4.72428	-1.2073	0.00121974	---	---
17622566	4.78026	3.95949	-1.20729	0.00237301	---	ENSRNOT00000087467
17702446	3.52984	2.92657	-1.20614	0.0483835	---	---
17626240	3.89925	3.23308	-1.20605	0.041846	Ina	NM_019128
17842262	4.4665	3.70436	-1.20574	0.00188045	Olr1174	NM_001001016
17763712	3.45352	2.86507	-1.20539	0.0445445	Olr624	NM_001000650
17829856	4.2456	3.52649	-1.20392	0.000942616	Mir3586	NR_037381
17863328	3.73708	3.10615	-1.20312	0.0439808	---	ENSRNOT00000070299
17747758	4.02135	3.34534	-1.20207	0.0150985	Vom2r47	NM_001099506
17660981	4.84873	4.0346	-1.20179	0.0274175	Krt10	NM_001008804
17722958	4.63525	3.86001	-1.20084	0.0426331	Spink6	NM_001008874
17833243	4.21816	3.5145	-1.20022	0.0359346	Olr1016	NM_001000070
17600391	5.23881	4.36548	-1.20005	0.0328411	---	---
17852193	3.819	3.18574	-1.19878	0.0428383	Ankk1	XM_008766198
17702472	3.373	2.81438	-1.19849	0.0496027	---	---
17752400	3.49567	2.91934	-1.19742	0.0375864	RT1-M10-1	NM_001008851
17878710	3.73528	3.12022	-1.19712	0.041357	---	ENSRNOT00000082854
17624558	5.04985	4.21919	-1.19688	0.0248604	Trpm3	NM_001191562
17608705	4.69102	3.92091	-1.19641	0.000512171	---	---
17602047	4.75524	3.97536	-1.19618	0.0210239	---	---
17646399	5.0374	4.21567	-1.19492	0.00256379	Drc3	NM_001013857
17689582	4.03237	3.37559	-1.19457	0.035338	Cnga1	NM_053497
17763570	3.78288	3.16941	-1.19356	0.0200215	Olr446	NM_001001050
17683488	3.6176	3.03193	-1.19317	0.0251471	Serpinb3	NM_001008887
17703435	4.48508	3.76017	-1.19279	0.0065183	RGD1563302	NM_001162899
17791813	2.33912	1.96113	-1.19274	0.0190568	---	---
17673846	4.02685	3.37749	-1.19226	0.0252847	Il31	XM_008760389
17653798	4.18415	3.50989	-1.1921	0.00362786	---	ENSRNOT00000081563
17686990	4.29205	3.60118	-1.19184	0.00446727	Mir350	NR_031794
17728879	3.56876	2.99588	-1.19122	0.0246951	---	ENSRNOT00000080045
17684944	4.69769	3.94395	-1.19111	0.0452007	---	ENSRNOT00000089834
17703315	4.7653	4.00318	-1.19038	0.0272197	Gjb6	NM_053388
17707537	4.30017	3.61251	-1.19035	0.0140015	Anxa10	NM_001109110
17799516	4.07045	3.42104	-1.18983	0.0435015	---	ENSRNOT00000077209
17696898	4.93535	4.1545	-1.18795	0.00318875	Dlg5	XM_003751423
17634523	4.96187	4.17874	-1.18741	0.0368854	---	---
17608425	4.55866	3.84105	-1.18683	0.0343817	---	---
17877783	3.96894	3.3466	-1.18596	0.0282397	---	ENSRNOT00000072905
17800994	4.62122	3.89827	-1.18546	0.0158124	Skint1	NM_001135916
17690722	3.90932	3.3	-1.18464	0.0208873	LOC102554167	ENSRNOT00000043609
17631136	4.6427	3.92068	-1.18416	0.0403852	Nccrp1	NM_001134506
17882261	5.3677	4.53591	-1.18338	0.00260833	---	XM_002724675
17698510	3.97919	3.36417	-1.18281	0.0253711	---	ENSRNOT00000084141
17702224	4.73516	4.00571	-1.1821	0.0166699	Olr1644	NM_001000101
17634626	5.30737	4.49681	-1.18025	0.0191669	Cfap161	NM_001100581
17625353	4.59421	3.89528	-1.17943	0.0139246	Pde6c	NM_001108522
17732832	3.83261	3.24961	-1.17941	0.0204837	---	GENSCAN00000031234
17659365	4.92918	4.18043	-1.17911	0.0119192	Heatr9	XM_006220751
17654396	4.91473	4.16914	-1.17884	0.0138331	Dnase1l2	XM_001057412
17824855	8.30674	7.04667	-1.17882	0.00834773	LOC100359684	XM_008764999
17743049	4.50506	3.82192	-1.17874	0.0130112	---	ENSRNOT00000084992
17619200	3.70074	3.14238	-1.17769	0.0489125	Olr178	NM_001000179
17693722	4.47289	3.79809	-1.17767	0.0316429	LOC494224	NM_001009505
17606323	5.55488	4.7191	-1.1771	0.026877	---	---
17867729	4.61144	3.91899	-1.17669	0.034581	Slc25a41	NM_001106874
17618059	4.98906	4.24196	-1.17612	0.037624	---	---
17863638	4.4585	3.79151	-1.17592	0.0128207	---	ENSRNOT00000077326
17792808	4.41122	3.75603	-1.17444	0.0221831	Cml2	NM_001173449
17609775	4.97031	4.23483	-1.17367	0.0250999	---	---
17634489	3.96494	3.38128	-1.17261	0.0397773	Ap3b2	XM_003748891
17762178	4.98941	4.26154	-1.1708	0.0082893	RGD1564306	XM_001066066
17700612	4.02145	3.43973	-1.16912	0.0136152	Slitrk5	NM_001107284
17767488	4.75758	4.07224	-1.1683	0.014946	Xkr7	NM_001012092
17725991	5.55938	4.75872	-1.16825	0.0337233	Gpr151	NM_181633
17685238	4.67044	3.99867	-1.168	0.0353412	Lamc2	NM_001100640
17755928	4.47606	3.83496	-1.16717	0.0165505	Olr1690	NM_001000274
17759539	5.23857	4.48991	-1.16674	0.00855843	Adamtsl4	NM_001034012
17601721	5.10688	4.37805	-1.16647	0.029625	---	---
17640692	4.21111	3.61117	-1.16614	0.00311496	Ms4a14	NM_181082
17824342	2.78722	2.39014	-1.16613	0.0487479	Mir3595	NR_037398
17703273	4.25521	3.64996	-1.16582	0.0288332	---	ENSRNOT00000079856
17842699	5.38123	4.61737	-1.16543	0.00660696	---	---
17807740	4.79395	4.11672	-1.16451	0.00197079	Slc46a2	NM_001106652
17702222	3.79423	3.2673	-1.16127	0.00765383	Olr1642	NM_001000832
17838832	4.31129	3.71494	-1.16053	0.0203767	Zfp647	XM_001075536
17646445	4.02683	3.47304	-1.15945	0.04812	Myo15a	XM_001077498
17808853	3.8015	3.27912	-1.15931	0.00293743	---	ENSRNOT00000083503
17605923	5.29388	4.56723	-1.1591	0.0301021	---	---
17738213	5.01335	4.32523	-1.15909	0.00508962	---	ENSRNOT00000077891
17610868	5.18691	4.47519	-1.15904	0.00395377	Lama2	XM_008758643
17629290	4.94189	4.2667	-1.15825	0.0301446	Mir290	NR_031937
17605609	5.40024	4.6627	-1.15818	0.0357833	---	---
17797213	4.74584	4.09814	-1.15805	0.00491802	---	---
17762495	4.15667	3.59003	-1.15784	0.0391744	---	GENSCAN00000035549
17779812	3.53564	3.05511	-1.15729	0.00378509	---	ENSRNOT00000051082
17823588	4.21306	3.64126	-1.15703	0.0453106	---	ENSRNOT00000069927
17640325	4.87068	4.20972	-1.15701	0.0374824	Scgb1a1	NM_013051
17702257	4.73244	4.09441	-1.15583	0.0412635	---	GENSCAN00000008873
17881771	4.78312	4.13856	-1.15574	0.0078209	---	---
17822080	4.74223	4.10353	-1.15565	0.0279782	Nkx2-8	NM_001106732
17841778	4.37337	3.78447	-1.15561	0.0118663	Zdhhc25	NM_001039333
17824049	4.06723	3.52224	-1.15473	0.0180982	Serpina1f	NM_001108054
17735855	3.9652	3.43449	-1.15452	0.0137544	Mir449a	NR_031950
17603577	5.55189	4.81213	-1.15373	0.0385185	---	---
17719153	5.39037	4.67369	-1.15334	0.00952488	---	ENSRNOT00000087511
17616176	5.44083	4.71879	-1.15301	0.0230357	Tsks	NM_199088
17763083	5.20083	4.51085	-1.15296	0.023927	Hoxd3	NM_001271038
17639613	4.46127	3.86957	-1.15291	0.021093	Ovol1	NM_001107572
17635622	4.49927	3.9038	-1.15254	0.0481053	Hbg1	NM_172093
17751213	4.24918	3.6869	-1.15251	0.0120377	---	NONRATT029449
17730018	4.37966	3.80028	-1.15246	0.0210283	Tat	NM_012668
17700532	4.29138	3.72542	-1.15192	0.0470957	Scel	NM_001108388
17636019	4.87446	4.23188	-1.15184	0.0175213	Ric3	NM_001115045
17697622	4.47304	3.88408	-1.15163	0.00422132	Fam107a	NM_001025129
17651595	4.62068	4.01242	-1.15159	0.0268557	Higd1b	NM_001105844
17845415	4.29216	3.72772	-1.15142	0.0482585	Car12	NM_001080756
17797967	4.49111	3.90085	-1.15132	0.0231999	---	GENSCAN00000040114
17724513	3.8889	3.37852	-1.15107	0.0296002	---	ENSRNOT00000079653
17644152	5.47916	4.76144	-1.15074	0.0053061	---	---
17740475	5.14105	4.46796	-1.15065	0.0297741	LOC102554691	XM_006232846
17781889	4.68147	4.07025	-1.15017	0.00423981	Spam1	NM_053967
17834496	5.00645	4.35307	-1.1501	0.016903	RGD1566251	XM_008765268
17718696	4.72492	4.11012	-1.14958	0.0225191	Cap2	NM_053874
17724626	4.88951	4.25342	-1.14955	0.0108455	Neto1	NM_001107371
17879722	3.85169	3.35112	-1.14937	0.0239989	Gabra3	NM_017069
17845434	4.57411	3.97971	-1.14936	0.0207536	C2cd4b	XM_001056441
17825279	4.91506	4.27654	-1.14931	0.00613337	Abcb5	XM_006225905
17604015	5.32195	4.63065	-1.14929	0.0440012	---	---
17604043	5.58058	4.85737	-1.14889	0.00258268	---	---
17605501	5.61572	4.88894	-1.14866	0.00382939	---	---
17608863	4.90303	4.26944	-1.1484	0.0433688	---	---
17748071	4.25269	3.70501	-1.14782	0.0398331	---	---
17873743	6.47001	5.63819	-1.14753	0.0347818	---	ENSRNOT00000079188
17726840	5.32293	4.63888	-1.14746	0.0331648	Mc4r	NM_013099
17665540	4.85629	4.23223	-1.14745	0.00347795	Plcxd2	NM_001134481
17881383	4.93968	4.30592	-1.14718	0.0321335	---	NM_001080936
17880540	4.44321	3.87376	-1.147	0.0279423	RGD1564513	XM_001054217
17605181	5.40456	4.71481	-1.14629	0.0400851	---	---
17794598	4.05416	3.53677	-1.14629	0.0313839	Rimklb	XM_001060530
17711605	3.87179	3.37794	-1.1462	0.014209	---	---
17745976	5.41564	4.72523	-1.14611	0.0225418	---	ENSRNOT00000085314
17625488	4.17516	3.64308	-1.14605	0.0491315	LOC100361547	XM_008759635
17880509	5.14787	4.49366	-1.14558	0.00895469	---	GENSCAN00000007783
17710577	4.55481	3.97622	-1.14551	0.0214107	Dydc2	NM_001134797
17604135	5.19692	4.53821	-1.14515	0.02726	---	---
17728416	5.10595	4.4596	-1.14493	0.0263591	---	NONRATT027169
17667361	4.59742	4.02066	-1.14345	0.0380435	---	ENSRNOT00000080642
17702490	5.2039	4.55137	-1.14337	0.00295839	---	GENSCAN00000008861
17673251	4.27965	3.74394	-1.14309	0.012994	---	GENSCAN00000019765
17847002	5.17597	4.52845	-1.14299	0.0356024	---	---
17745923	4.27561	3.74387	-1.14203	0.0335716	LOC499542	NM_001047943
17791329	5.30256	4.64598	-1.14132	0.00332724	Npvf	NM_023952
17774863	4.7868	4.19416	-1.1413	0.0146426	---	ENSRNOT00000080214
17881821	5.46061	4.78599	-1.14096	0.0358471	---	NM_001014271
17601131	4.26671	3.74072	-1.14061	0.0316573	---	---
17601465	4.26671	3.74072	-1.14061	0.0316573	---	---
17633360	6.73765	5.90717	-1.14059	0.00128926	LOC102552287	XR_350353
17602627	6.17389	5.41471	-1.14021	0.0176791	---	---
17788981	4.59118	4.02949	-1.13939	0.0385835	Cacna2d1	NM_001110847
17605917	3.76262	3.30286	-1.1392	0.0163636	---	---
17609867	5.36902	4.71299	-1.1392	0.0467786	---	---
17775317	4.26396	3.74358	-1.139	0.00944937	Olr783	NM_001000376
17607405	4.72706	4.15096	-1.13879	0.0377921	---	---
17605595	4.93558	4.3343	-1.13873	0.0455406	---	---
17708420	5.43705	4.77517	-1.13861	0.0154056	Unc5d	NM_001107319
17689138	4.7484	4.1712	-1.13838	0.00750466	Tmprss11g	NM_001008554
17711299	4.05529	3.56433	-1.13774	0.0183207	---	GENSCAN00000014289
17810194	5.25984	4.62637	-1.13693	0.0221678	Mir30e	NR_031840
17733825	4.68383	4.11983	-1.1369	0.00896016	Dynlrb2	NM_001108451
17860813	5.16034	4.53954	-1.13675	0.042539	Nyap2	XR_589287
17775580	5.06928	4.45996	-1.13662	0.00761033	Meis2	NM_001107758
17676816	4.68395	4.12112	-1.13657	0.0436698	RGD1560262	XM_008758333
17608487	4.97118	4.37388	-1.13656	0.0356083	---	---
17627560	3.97086	3.49433	-1.13637	0.0468981	---	GENSCAN00000014449
17665778	4.73311	4.16705	-1.13584	0.0451857	---	ENSRNOT00000069715
17786441	4.57975	4.03236	-1.13575	0.0448772	Olr825	NM_001000904
17818407	4.3157	3.79995	-1.13573	0.0197681	Mir433	NR_031954
17882705	4.62437	4.07246	-1.13552	0.0213511	---	NM_013183
17655546	4.05454	3.57119	-1.13535	0.0137933	---	GENSCAN00000030299
17868846	5.64551	4.97449	-1.13489	0.0163821	LOC689679	XM_008766797
17829702	4.6289	4.07883	-1.13486	0.0335529	---	ENSRNOT00000079246
17878909	4.41321	3.8899	-1.13453	0.0187032	Bex2	NM_001077435
17854779	4.73237	4.17387	-1.13381	0.0489375	LOC102551788	XM_008757843
17664320	6.03761	5.32682	-1.13344	0.0238165	---	ENSRNOT00000062574
17808518	4.21377	3.71806	-1.13332	0.0124428	LOC103692403	XR_592584
17808056	4.53069	3.99776	-1.13331	0.0413771	LOC688893	XM_008763818
17830369	5.28977	4.668	-1.1332	0.0380061	---	ENSRNOT00000054626
17843290	5.07666	4.48015	-1.13314	0.0211243	Olr1237	NM_001000963
17813301	4.76211	4.20482	-1.13254	0.00157797	---	---
17728965	4.34425	3.83705	-1.13218	0.0168392	---	ENSRNOT00000054527
17755361	4.93757	4.36179	-1.13201	0.00635939	Tspyl4	NM_001012075
17666899	3.26294	2.88299	-1.13179	0.0362551	Olr1565	NM_001000908
17764518	4.97508	4.39651	-1.1316	0.0159976	Kcna4	NM_012971
17723355	4.83257	4.27077	-1.13154	0.0282137	Megf10	NM_001100657
17828407	5.90733	5.224	-1.13081	0.0072512	---	NONRATT049641
17600351	5.41059	4.78603	-1.1305	0.0499089	---	---
17804603	4.53046	4.0079	-1.13038	0.0407678	Chd5	NM_001271226
17880776	4.88182	4.32124	-1.12973	0.0400954	---	GENSCAN00000033061
17664967	4.50983	3.99264	-1.12954	0.0138121	Igsf5	NM_001006990
17603043	5.84311	5.17462	-1.12919	0.0134668	---	---
17608459	4.87991	4.32303	-1.12882	0.0268694	---	---
17647406	5.23342	4.6364	-1.12877	0.0235548	Aloxe3	NM_001105793
17871949	2.37445	2.10369	-1.12871	0.0181891	---	ENSRNOT00000082556
17833251	5.19746	4.60511	-1.12863	0.00304821	Olr1029	NM_001001366
17826812	4.17572	3.70285	-1.1277	0.0183029	Cyp4f4	NM_173123
17867793	4.94398	4.38529	-1.1274	0.00453554	Acsbg2	NM_001080096
17808328	4.45327	3.95015	-1.12737	0.0140522	Cer1	NM_001115031
17809798	4.70326	4.17342	-1.12696	0.0389184	Artn	NM_053397
17867296	4.6794	4.15246	-1.1269	0.0331103	---	FQ211281
17636104	4.79516	4.2564	-1.12658	0.02413	Ascl3	NM_001271234
17835418	4.43356	3.93714	-1.12609	0.0353283	Lrriq1	XM_008765345
17729434	5.16836	4.59012	-1.12598	0.00924096	Hsd11b2	NM_017081
17843707	5.69133	5.05496	-1.12589	0.00546671	---	ENSRNOT00000089208
17883648	4.6828	4.15987	-1.12571	0.0481979	---	---
17879397	4.46536	3.96743	-1.1255	0.0248838	LOC102549487	XM_006257131
17803994	4.29606	3.81777	-1.12528	0.0356515	Pramel1	NM_001109617
17659474	4.76823	4.23757	-1.12523	0.0392912	Lhx1	NM_145880
17749195	4.58728	4.07711	-1.12513	0.0237122	Lce1f	NM_001109188
17797596	4.77382	4.24548	-1.12445	0.00349854	---	---
17619902	6.886	6.12443	-1.12435	0.00815709	---	---
17819539	3.82881	3.40785	-1.12352	0.0136599	---	GENSCAN00000045059
17733326	2.75285	2.4502	-1.12352	0.027248	---	ENSRNOT00000084234
17813463	5.37286	4.78234	-1.12348	0.00197438	---	---
17798098	4.87011	4.33756	-1.12278	0.0308677	---	ENSRNOT00000085335
17633882	4.08785	3.64228	-1.12233	0.0449254	---	GENSCAN00000031039
17873738	5.13744	4.57815	-1.12216	0.0366901	---	---
17814334	5.5433	4.94133	-1.12182	0.00174805	---	GENSCAN00000018776
17869474	4.58312	4.08816	-1.12107	0.0332525	---	---
17735945	5.47967	4.88889	-1.12084	0.00575374	Fgf10	NM_012951
17805606	4.11312	3.67028	-1.12066	0.0421962	---	ENSRNOT00000085093
17879250	4.73477	4.22596	-1.1204	0.00705321	Frmd7	XM_006227560
17660032	4.42593	3.95142	-1.12009	0.0221894	Kif2b	NM_001005874
17613529	4.88998	4.36631	-1.11993	0.00273851	---	ENSRNOT00000085100
17619401	4.85712	4.33719	-1.11988	0.0294116	Olr240	XM_006223447
17641090	4.33	3.86694	-1.11975	0.0381284	---	---
17784786	4.3768	3.90877	-1.11974	0.0134344	LOC500227	NM_001024330
17694801	4.21763	3.76695	-1.11964	0.00933156	Gba3	NM_001106010
17685759	4.34682	3.88304	-1.11944	0.00480925	Tnn	NM_001107189
17764450	7.82762	6.99292	-1.11936	0.00405082	Pax6	NM_013001
17666113	4.5764	4.08869	-1.11928	0.0186133	---	ENSRNOT00000088128
17839044	5.74409	5.13348	-1.11895	0.022555	Elfn2	XM_006242041
17787581	4.88341	4.36526	-1.1187	0.0276955	Tmem52b	NM_001109560
17636421	4.54313	4.06187	-1.11848	0.0158531	Calca	NM_001033955
17610799	4.54765	4.06599	-1.11846	0.00810174	---	ENSRNOT00000089467
17872707	4.32925	3.87175	-1.11817	0.0469137	LOC100363193	NM_001177824
17651028	6.73393	6.0228	-1.11807	0.0202083	Krtap31-1	NM_001109409
17872065	4.50203	4.02708	-1.11794	0.0100159	---	ENSRNOT00000081857
17751175	4.90108	4.38688	-1.11721	0.0111725	---	ENSRNOT00000086024
17629551	4.72688	4.23175	-1.11701	0.0147232	Ssc5d	NM_001134545
17606729	5.55064	4.96925	-1.117	0.0338481	---	---
17657885	5.10519	4.57133	-1.11678	0.00828642	LOC497938	NM_001017475
17781529	4.43791	3.97395	-1.11675	0.0376442	---	ENSRNOT00000079946
17600985	7.96738	7.13726	-1.11631	0.00262153	---	---
17601319	7.96738	7.13726	-1.11631	0.00262153	---	---
17877649	4.69708	4.21088	-1.11546	0.00230989	---	ENSRNOT00000050742
17607367	5.46077	4.89571	-1.11542	0.0457077	---	---
17744336	5.26093	4.71691	-1.11534	0.0318583	Pde8b	NM_199268
17838598	5.8366	5.23359	-1.11522	0.000694252	---	ENSRNOT00000080508
17702821	3.99837	3.58552	-1.11514	0.014899	Mir208a	NR_031922
17745068	4.77165	4.27961	-1.11497	0.0127196	Rnf180	NM_001134986
17606839	5.66187	5.07827	-1.11492	0.0295836	---	---
17619066	4.17375	3.74386	-1.11482	0.0169846	Olr67	NM_001001279
17655496	5.17605	4.64323	-1.11475	0.0270566	---	---
17820421	5.44416	4.88427	-1.11463	0.0378663	Clip4	NM_001013942
17759240	5.13069	4.60448	-1.11428	0.0120419	RGD1561147	OTTRNOT00000001670
17713972	5.57371	5.00215	-1.11426	0.0172989	Ctsql2	NM_001002813
17642788	4.00094	3.59103	-1.11415	0.0190186	Mir3584	NR_037378
17882777	4.00094	3.59103	-1.11415	0.0190186	---	NR_037378
17631487	4.6531	4.17683	-1.11403	0.0447962	Lrfn3	NM_001107502
17612937	4.37043	3.92792	-1.11266	0.045017	Olr6	NM_001000539
17635954	5.12834	4.61088	-1.11223	0.0317412	LOC499235	XM_001076383
17830795	4.50035	4.04655	-1.11214	0.0119658	Fam83f	NM_001130502
17613757	5.17755	4.65604	-1.11201	0.0475168	Ccdc8	NM_001009533
17600395	5.36669	4.82883	-1.11138	0.0336701	---	---
17620632	4.51486	4.06288	-1.11125	0.00333398	---	---
17801896	5.22779	4.70561	-1.11097	0.0199684	Pou3f1	NM_138838
17798988	4.78075	4.30368	-1.11085	0.0382728	Tal2	NM_001109462
17606363	5.47793	4.93319	-1.11042	0.0472514	---	---
17715355	5.93752	5.34717	-1.1104	0.0347107	RGD1564786	XM_003754666
17716950	4.80479	4.32719	-1.11037	0.0192832	---	ENSRNOT00000085036
17824104	4.23864	3.81761	-1.11029	0.0202139	LOC299277	XM_008764902
17643583	4.82	4.34316	-1.10979	0.022184	Tnp2	NM_017057
17661722	4.53728	4.08849	-1.10977	0.0269678	Meox1	NM_001108837
17703992	4.87959	4.39724	-1.10969	0.026757	---	---
17848419	5.26437	4.7444	-1.1096	0.019382	Dclk3	NM_001191800
17665014	5.26944	4.7505	-1.10924	0.0350718	---	---
17692634	5.40001	4.86854	-1.10916	0.0268566	---	---
17601039	5.99595	5.40697	-1.10893	0.0321002	---	---
17601373	5.99595	5.40697	-1.10893	0.0321002	---	---
17605029	4.98268	4.49364	-1.10883	0.019851	---	---
17737688	5.23376	4.72047	-1.10874	0.043241	---	ENSRNOT00000079431
17775034	4.76256	4.29584	-1.10864	0.00449629	---	GENSCAN00000041200
17881941	5.80619	5.2372	-1.10864	0.00680346	---	XM_006227052
17869572	5.47882	4.94194	-1.10864	0.0262479	---	---
17675586	5.26469	4.7502	-1.10831	0.0237308	---	ENSRNOT00000078541
17680867	4.60873	4.15854	-1.10826	0.0194588	---	---
17675050	5.10452	4.60592	-1.10825	0.0382646	Tgfbr3l	XM_001067872
17877456	4.46468	4.02887	-1.10817	0.0395628	Cldn34e	NM_001109415
17720410	5.49842	4.9627	-1.10795	0.00983922	LOC100911936	XM_008771800
17723923	4.59889	4.15124	-1.10783	0.0446429	Cplx4	NM_001191835
17883610	4.18141	3.77611	-1.10733	0.0427791	---	---
17719553	4.5379	4.09917	-1.10703	0.0187359	Olr1657	NM_001000536
17691740	4.57689	4.13736	-1.10623	0.0313223	---	ENSRNOT00000088356
17821656	6.48168	5.85968	-1.10615	0.0132958	Smarce1l	XM_001077473
17663446	4.90062	4.43113	-1.10595	0.0432832	---	ENSRNOT00000080079
17725450	5.42562	4.90645	-1.10581	0.0108171	Nme5	XM_003751760
17848691	5.08161	4.59627	-1.10559	0.0416957	Vill	NM_001191617
17703296	4.7996	4.34165	-1.10548	0.0465468	LOC100912477	XM_008770811
17623944	4.94317	4.47194	-1.10537	0.00744323	Scgb2a2	NM_203333
17846278	4.76035	4.30739	-1.10516	0.0237169	---	GENSCAN00000044420
17854667	5.39342	4.88309	-1.10451	0.0282551	LOC102550510	XR_348670
17747666	4.72654	4.27985	-1.10437	0.0276871	Gpr149	NM_138891
17869709	6.22345	5.63558	-1.10431	0.00204035	Trav6	GENSCAN00000058631
17868119	6.32549	5.73116	-1.1037	0.00485483	---	GENSCAN00000047086
17855546	4.70559	4.2638	-1.10361	0.0398627	Lsmem2	XM_001071401
17689363	4.8408	4.38672	-1.10351	0.0433272	Pdcl2	XM_001076368
17867362	6.32377	5.73077	-1.10348	0.0041028	---	GENSCAN00000047086
17878161	6.04498	5.47877	-1.10335	0.0444518	Cited1	NM_172055
17721826	4.88214	4.4258	-1.10311	0.0111988	Asxl3	XR_361246
17877718	5.38148	4.87848	-1.10311	0.0152816	RGD1561382	XM_001064013
17817776	6.44327	5.84109	-1.10309	0.0298719	---	GENSCAN00000025590
17880104	5.55565	5.03726	-1.10291	0.00587591	Olr1768	NM_001000264
17861671	5.61994	5.09582	-1.10285	0.0207502	Olr1349	NM_001000484
17611503	5.51325	4.99963	-1.10273	0.0183494	Ccdc170	XM_001065531
17762220	4.52155	4.10097	-1.10256	0.0344746	---	ENSRNOT00000083238
17802918	5.23712	4.7529	-1.10188	0.00205851	---	---
17720202	4.62503	4.19753	-1.10185	0.00981086	---	---
17873647	4.35199	3.95015	-1.10173	0.0487753	RGD1561958	NM_001108819
17611785	5.31136	4.82146	-1.10161	0.0435448	Acat2	NM_001006995
17629546	5.95792	5.40872	-1.10154	0.0253867	Ccdc106	XM_008759011
17768497	5.17587	4.69879	-1.10153	0.0213606	---	ENSRNOT00000087538
17862441	5.6838	5.16031	-1.10145	0.00589139	LOC100910172	XM_003750615
17624339	5.32746	4.84039	-1.10063	0.0101166	Olr354	NM_001001045
17851559	4.82423	4.38374	-1.10048	0.017021	Grik4	NM_012572
17844098	5.99057	5.44596	-1.1	0.000387502	Arhgap20	NM_213629
17603261	5.51824	5.01666	-1.09998	0.0421705	---	---
17736162	4.34068	3.94674	-1.09981	0.0287098	C9	NM_057146
17607991	5.65322	5.14145	-1.09954	0.046753	---	---
17604873	5.25026	4.77528	-1.09947	0.0246981	---	---
17723932	5.78277	5.25995	-1.0994	0.0440359	---	---
17736694	5.30587	4.82696	-1.09922	0.0262601	Cdh12	XM_008760817
17799810	6.32581	5.75561	-1.09907	0.000539083	---	---
17840689	4.94177	4.49636	-1.09906	0.00341232	Zfp641	NM_001106792
17606263	5.70555	5.19229	-1.09885	0.027611	---	---
17786914	5.10425	4.64508	-1.09885	0.00367392	Nanog	NM_001100781
17613764	4.44181	4.04234	-1.09882	0.047213	Cgm4	NM_012525
17684169	4.73014	4.30527	-1.09869	0.0312973	Nfasc	NM_001160313
17880331	5.04712	4.59467	-1.09847	0.00572702	LOC102552603	XR_340664
17609935	6.0938	5.55014	-1.09795	0.047738	---	---
17693232	4.84227	4.4104	-1.09792	0.044265	---	---
17821011	5.70117	5.19313	-1.09783	0.00418242	Klhl29	NM_001106713
17647775	5.514	5.02281	-1.09779	0.0318977	Zmynd15	NM_001105800
17841714	5.10137	4.64724	-1.09772	0.000319701	LOC102555445	XM_006242468
17720009	5.21163	4.74805	-1.09764	0.00923034	Armc4	XM_006222441
17789619	5.0071	4.56211	-1.09754	0.0476708	Dlx5	NM_012943
17697482	5.83769	5.31923	-1.09747	0.00573726	Lrrc3b	XM_002725036
17866034	4.84069	4.41159	-1.09727	0.0308421	Sphkap	NM_001127492
17720871	5.09809	4.64665	-1.09715	0.0114829	---	---
17877638	5.12635	4.67263	-1.0971	0.0289762	Mageb3	NM_001106965
17864988	6.09946	5.56044	-1.09694	0.0039561	---	ENSRNOT00000087417
17843322	4.7328	4.3147	-1.0969	0.0472801	LOC100909501	XM_008762441
17657206	5.49332	5.00883	-1.09673	0.0397747	Zfp286a	NM_001191921
17660251	5.03656	4.59371	-1.0964	0.0288004	LOC103693451	XM_008768247
17601181	6.61723	6.03587	-1.09632	0.0123457	---	---
17601515	6.61723	6.03587	-1.09632	0.0123457	---	---
17746044	5.21105	4.75481	-1.09595	0.0324544	---	ENSRNOT00000087318
17847979	5.16164	4.7102	-1.09584	0.00621119	Ucn2	NM_133385
17712422	5.50262	5.02142	-1.09583	0.0335885	---	ENSRNOT00000079994
17707312	5.62615	5.13432	-1.09579	0.0417102	Cilp2	NM_001107307
17600327	6.29357	5.74372	-1.09573	0.0259748	---	---
17880557	4.88376	4.45761	-1.0956	0.0371878	RGD1564386	XM_006232801
17648348	5.60891	5.11961	-1.09557	0.043552	---	GENSCAN00000044774
17617952	6.09007	5.5599	-1.09536	0.00221528	Adamtsl3	NM_001107533
17879485	5.83475	5.32729	-1.09526	0.0183732	Gpr101	NM_001108258
17879512	4.76298	4.34877	-1.09525	0.00324377	Fgf13	ENSRNOT00000091330
17874027	5.52338	5.04377	-1.09509	0.0148111	Arxes2	XM_006227467
17859089	4.78534	4.37018	-1.095	0.00755655	LOC100912473	XR_349035
17602593	6.04103	5.51749	-1.09489	0.036448	---	---
17667363	6.98537	6.38066	-1.09477	0.0435299	Epha3	NM_031564
17815742	6.01875	5.49898	-1.09452	0.0165688	---	ENSRNOT00000080886
17635528	5.61368	5.12896	-1.09451	0.0451441	Olr51	NM_001001021
17606635	5.3035	4.84605	-1.0944	0.0435189	---	---
17798915	4.39743	4.01874	-1.09423	0.0370991	Olr844	XM_008763721
17782216	4.4808	4.09579	-1.094	0.0474831	Cpa5	NM_001002808
17763172	5.95116	5.4401	-1.09394	0.0096661	Dfnb59	XM_006224498
17735842	4.85797	4.44092	-1.09391	0.0231114	Mcidas	XM_001068366
17758286	6.00128	5.48653	-1.09382	0.0269989	---	GENSCAN00000028760
17688247	5.53023	5.05617	-1.09376	0.00467472	Hsd17b13	NM_001009684
17606859	5.03587	4.60444	-1.0937	0.0258534	---	---
17624370	4.25802	3.89356	-1.0936	0.0262987	---	ENSRNOT00000091307
17688272	3.67999	3.36507	-1.09358	0.0281039	LOC498330	NM_001017495
17869682	6.31176	5.77164	-1.09358	0.00595933	LOC102557241	XM_006227142
17725943	4.82612	4.41333	-1.09353	0.0447753	Grxcr2	NM_001191078
17749022	4.78212	4.37371	-1.09338	0.0478936	Creb3l4	NM_001007093
17666560	6.14999	5.62477	-1.09338	0.0359473	---	GENSCAN00000003864
17688200	4.84834	4.43551	-1.09307	0.0272259	Znf442	XM_006221658
17863459	4.84578	4.43395	-1.09288	0.0179477	RGD1309049	NM_001013956
17601077	7.54699	6.90647	-1.09274	0.0307587	---	---
17601411	7.54699	6.90647	-1.09274	0.0307587	---	---
17880121	6.37626	5.83625	-1.09253	0.0302335	Dmrtc1a	ENSRNOT00000074259
17659942	4.35527	3.98668	-1.09245	0.0250944	Nog	NM_012990
17865795	4.19458	3.83968	-1.09243	0.0128079	Pax3	NM_053710
17779825	5.87664	5.38093	-1.09212	0.0155044	---	ENSRNOT00000075547
17755115	5.04604	4.62178	-1.0918	0.0300911	---	ENSRNOT00000092124
17808953	4.81545	4.41233	-1.09136	0.0115478	RGD1562532	XM_001063526
17851813	6.08816	5.58101	-1.09087	0.00689149	Upk2	NM_001109523
17640341	4.46647	4.09475	-1.09078	0.0408177	RGD1566289	XM_008760251
17726144	5.92949	5.43642	-1.0907	0.0148897	Mospd4	NM_001108241
17711787	4.72611	4.33319	-1.09068	0.0402105	Pdlim3	NM_053650
17675131	5.30132	4.86078	-1.09063	0.0348118	---	XM_003752548
17851205	5.54778	5.08751	-1.09047	0.00574597	LOC102550797	XM_008766081
17778324	7.07748	6.49079	-1.09039	0.0081159	Defb29	NM_001037368
17842847	4.44017	4.07295	-1.09016	0.0254529	Adamts8	XM_003750455
17882207	6.56483	6.02251	-1.09005	0.0117781	---	NR_028365
17881717	8.29727	7.61184	-1.09005	0.00928263	---	---
17858017	4.70225	4.31507	-1.08973	0.0210213	---	GENSCAN00000049595
17799635	4.60544	4.22871	-1.08909	0.0427026	Adamtsl1	XM_008763845
17863712	5.57759	5.12204	-1.08894	0.0390695	Prss40	NM_001108209
17662347	5.00769	4.59884	-1.0889	0.0325436	---	---
17779823	4.93751	4.5349	-1.08878	0.00963467	---	XM_008758222
17881279	4.69612	4.31365	-1.08867	0.042202	---	RPTR-M10961-4
17764288	7.2563	6.66615	-1.08853	0.0198438	Pamr1	NM_001107755
17870195	6.08538	5.59049	-1.08852	0.0462213	---	---
17711204	4.68528	4.30438	-1.08849	0.0461978	RGD1559708	ENSRNOT00000016204
17783152	4.99653	4.59168	-1.08817	0.0393326	---	---
17650552	5.13593	4.71992	-1.08814	0.0345542	Hoxb1	XM_001081344
17659665	5.35954	4.92548	-1.08813	0.032822	---	---
17794908	5.077	4.66762	-1.08771	0.0118372	Lag3	NM_212513
17633868	4.77722	4.39241	-1.08761	0.0470279	---	ENSRNOT00000090056
17795265	4.58723	4.21805	-1.08752	0.0426795	A2ml1	XM_001066684
17736920	5.45138	5.01318	-1.08741	0.0256515	Ctnnd2	NM_001271502
17831539	5.0684	4.6611	-1.08738	0.0368075	Mov10l1	XM_006226211
17693657	5.5572	5.11082	-1.08734	0.00594111	Ambn	NM_012900
17882035	5.75058	5.28919	-1.08723	0.0207857	---	NM_001101021
17752439	4.82972	4.44347	-1.08692	0.0248535	---	ENSRNOT00000061411
17632211	6.00208	5.52322	-1.0867	0.0342679	---	GENSCAN00000021695
17844619	5.31524	4.89158	-1.08661	0.0456994	Stra6	NM_001029924
17763597	5.01709	4.61835	-1.08634	0.0337098	Olr469	NM_001000299
17767047	4.52826	4.16842	-1.08633	0.0465916	---	ENSRNOT00000066588
17707428	4.80062	4.41956	-1.08622	0.0405086	Npy5r	XM_006253013
17783592	5.25395	4.83716	-1.08616	0.0479368	RGD1564419	NR_132628
17744314	5.19216	4.78054	-1.0861	0.0423813	Bhmt2	NM_001014256
17770130	5.37706	4.95289	-1.08564	0.0291146	Noxa1	NM_001100171
17698315	6.56572	6.04802	-1.0856	0.00464037	---	AB036696
17815528	6.85128	6.31187	-1.08546	0.0121127	---	---
17792005	5.70251	5.25357	-1.08545	0.0170035	---	GENSCAN00000018562
17659584	4.56657	4.20772	-1.08528	0.0165274	---	---
17700900	5.49521	5.06363	-1.08523	0.0131996	---	GENSCAN00000048955
17870350	6.5538	6.03915	-1.08522	0.00529353	LOC102557241	XM_006227142
17605197	5.79977	5.34573	-1.08494	0.0308308	---	---
17805295	6.28259	5.79096	-1.0849	0.00290692	---	---
17602655	6.7404	6.21336	-1.08482	0.00155711	---	---
17665165	6.21064	5.7253	-1.08477	0.033584	LOC680528	ENSRNOT00000060861
17603265	6.01066	5.54116	-1.08473	0.00461544	---	---
17854510	7.37032	6.79547	-1.08459	0.0487875	Tbx18	NM_001108173
17747408	4.90453	4.52214	-1.08456	0.0453814	---	GENSCAN00000054092
17679209	4.51408	4.16256	-1.08445	0.0419181	Cyp3a85-ps	XM_008759136
17647444	4.5449	4.19114	-1.08441	0.0130438	Kcnab3	NM_031652
17873966	5.52021	5.09208	-1.08408	0.0385707	Nxf7	NM_001037216
17842288	3.0684	2.83128	-1.08375	0.0302144	---	ENSRNOT00000080906
17803896	5.5267	5.10161	-1.08333	0.000569963	Epha2	NM_001108977
17719224	6.31652	5.83124	-1.08322	0.0307458	---	ENSRNOT00000063068
17661230	5.90141	5.44936	-1.08295	0.0445701	Krt13	NM_001004021
17852434	5.4012	4.98789	-1.08286	0.0423291	RGD1562914	XM_008766355
17720419	5.19837	4.80112	-1.08274	0.000840343	Idi2/RGD1564999	XM_001072335
17670580	5.42403	5.00962	-1.08272	0.00569298	Olr1569	NM_001000042
17868197	6.84666	6.3237	-1.0827	0.0050886	LOC679711	XM_008758655
17869485	6.84666	6.3237	-1.0827	0.0050886	LOC679711	XM_008758655
17870285	6.84666	6.3237	-1.0827	0.0050886	---	GENSCAN00000047086
17665967	4.8747	4.50271	-1.08262	0.0258854	Fbxo40	XM_006248404
17760196	5.59381	5.16888	-1.08221	0.0213786	LOC681186	XM_001060674
17879348	6.16225	5.69478	-1.08209	0.000852023	RGD1561558	XM_008758130
17644331	5.55169	5.1309	-1.08201	0.017618	Noxo1	NM_001106986
17776404	5.62943	5.20279	-1.082	0.0324847	Serinc4	NM_001110811
17746038	5.36671	4.96189	-1.08159	0.0345029	Fbxl7	NM_001108545
17638177	6.28921	5.81517	-1.08152	0.0225257	Syce1	NM_001025058
17804140	4.73967	4.38313	-1.08134	0.00698599	Nppa	NM_012612
17610516	5.99928	5.54841	-1.08126	0.011274	---	---
17625478	6.01094	5.55925	-1.08125	0.0345705	Cyp2c6v1	XM_008759612
17857098	5.66023	5.23516	-1.0812	0.0320305	Daam2	XM_006226766
17698897	5.74319	5.3131	-1.08095	0.0237801	---	GENSCAN00000019186
17702334	5.6091	5.18949	-1.08086	0.00981868	---	ENSRNOT00000060298
17869695	5.57498	5.15819	-1.0808	0.0284467	RGD1564212	XM_002725076
17829421	5.67032	5.24652	-1.08078	0.00633596	Col14a1	NM_001130548
17816099	5.81494	5.38036	-1.08077	0.000887323	---	ENSRNOT00000089568
17701208	6.00273	5.55426	-1.08074	0.0318925	---	---
17607695	5.32045	4.92349	-1.08063	0.0349384	---	---
17609113	5.32045	4.92349	-1.08063	0.0349384	---	---
17648707	5.75444	5.32557	-1.08053	0.00817374	Dbil5	NM_021596
17709497	5.85503	5.42128	-1.08001	0.0189006	Slc10a2	XM_006227219
17687351	5.6503	5.23181	-1.07999	0.0191525	---	NONRATT017945
17779070	6.08714	5.63638	-1.07997	0.049787	---	GENSCAN00000017106
17718233	5.73276	5.3084	-1.07994	0.049499	Unc5a	NM_022206
17824656	6.12644	5.67451	-1.07964	0.0468876	---	ENSRNOT00000079301
17810751	5.20454	4.82078	-1.07961	0.0298819	Hpca	NM_017122
17669287	5.49822	5.093	-1.07956	0.0441472	---	GENSCAN00000033906
17712628	5.27753	4.88889	-1.0795	0.0235023	---	---
17665587	4.7527	4.40291	-1.07944	0.0124676	Tmprss7	NM_001105882
17796078	5.29822	4.90829	-1.07944	0.00602305	---	GENSCAN00000019540
17693376	5.94851	5.51072	-1.07944	0.0322394	---	ENSRNOT00000077515
17785351	4.987	4.62357	-1.0786	0.0368353	Prr20e	XM_008763118
17880336	5.49064	5.09249	-1.07818	0.0101612	LOC103693702	XR_595655
17869453	6.71066	6.22536	-1.07796	0.0318335	---	GENSCAN00000047063
17773945	6.29744	5.84276	-1.07782	0.00200808	---	GENSCAN00000033610
17869706	3.45318	3.20409	-1.07774	0.0252521	---	ENSRNOT00000073133
17873834	5.62416	5.21876	-1.07768	0.0360095	Tmem35	NM_001001799
17862356	5.80962	5.39106	-1.07764	0.011772	Yes1	NM_033298
17882555	5.53417	5.13592	-1.07754	0.00642145	---	XM_006227192
17881601	5.5434	5.14488	-1.07746	0.0320038	---	XR_600372
17601123	6.21045	5.76532	-1.07721	0.00470665	---	---
17601457	6.21045	5.76532	-1.07721	0.00470665	---	---
17871552	4.30254	3.99426	-1.07718	0.0319478	---	ENSRNOT00000077183
17807538	6.15258	5.71239	-1.07706	0.0148119	Txndc8	NM_001004092
17712200	5.75373	5.34224	-1.07703	0.0232205	---	GENSCAN00000057995
17842195	5.64366	5.24019	-1.077	0.0358118	mbd3l2l	XM_002727003
17642527	6.03632	5.605	-1.07695	0.0183411	Pitx3	NM_019247
17810714	6.1137	5.67779	-1.07678	0.019041	Gja4	NM_021654
17607735	5.79139	5.38014	-1.07644	0.0300252	---	---
17609153	5.79139	5.38014	-1.07644	0.0300252	---	---
17807890	4.72067	4.38715	-1.07602	0.026408	---	GENSCAN00000031394
17827996	6.53273	6.07135	-1.07599	0.0179536	Ppfia2	NM_001108745
17734724	6.30996	5.86445	-1.07597	0.0469938	---	---
17868060	5.78034	5.37304	-1.07581	0.0113933	---	---
17879063	5.17779	4.8134	-1.0757	0.0474452	LOC681067	XM_006227528
17608175	8.4291	7.83665	-1.0756	0.00760808	---	---
17660780	5.75704	5.35269	-1.07554	0.0321013	Neurod2	NM_019326
17605487	6.70403	6.23352	-1.07548	0.0397627	---	---
17879695	5.99717	5.57645	-1.07545	0.00437117	---	ENSRNOT00000035638
17780018	5.78441	5.37987	-1.0752	0.0425302	Tcfl5	XM_006224779
17609909	5.07962	4.72446	-1.07517	0.0139016	---	---
17622119	7.234	6.72901	-1.07505	0.0214237	B4galnt4	NM_001107562
17881667	5.42496	5.04703	-1.07488	0.0472408	---	NM_001276440
17705538	5.59669	5.20777	-1.07468	0.0105314	LOC290071	BC091273
17726735	8.03048	7.47372	-1.0745	0.00378419	---	GENSCAN00000041981
17656988	7.23562	6.73414	-1.07447	0.0474114	Rnf112	NM_138613
17608249	6.08222	5.66077	-1.07445	0.00965158	---	---
17688977	4.92518	4.58436	-1.07434	0.038041	Csn2	NM_017120
17754651	6.04114	5.62347	-1.07427	0.0409362	Bicc1	NM_001108531
17704550	5.61755	5.22919	-1.07427	0.0302209	---	ENSRNOT00000085791
17826613	5.72184	5.32634	-1.07425	0.0309111	---	---
17638514	6.28193	5.8482	-1.07416	0.00751153	Dusp8	NM_001108510
17845789	5.66834	5.27731	-1.0741	0.00792216	Dyx1c1	NM_001007010
17668582	5.34718	4.97831	-1.0741	0.0305687	---	ENSRNOT00000080645
17872516	4.06706	3.78686	-1.07399	0.0310421	LOC100362173	XM_002730241
17822968	6.18825	5.76258	-1.07387	0.0378356	---	GENSCAN00000002002
17785030	5.08265	4.73335	-1.0738	0.0339019	---	ENSRNOT00000080196
17867662	5.53789	5.15822	-1.0736	0.0461058	---	GENSCAN00000005032
17732027	5.65659	5.26961	-1.07344	0.0372964	Cyld	ENSRNOT00000091626
17840679	6.21709	5.79367	-1.07308	0.00584583	---	---
17702407	5.33995	4.9767	-1.07299	0.0321652	---	GENSCAN00000058629
17605069	6.18831	5.76758	-1.07295	0.0371214	---	---
17856622	5.3636	4.9999	-1.07274	0.00625151	Fam198a	XM_001078210
17809460	4.77905	4.45519	-1.07269	0.0474326	---	GENSCAN00000006657
17722736	5.69745	5.31216	-1.07253	0.034226	Pcdhgb5	XM_008772070
17648358	5.10243	4.75788	-1.07242	0.0309803	Olfr390	ENSRNOT00000081152
17610457	4.82393	4.49842	-1.07236	0.0450055	---	GENSCAN00000004972
17774148	5.89282	5.49581	-1.07224	0.00168578	Olr505	NM_001000679
17808188	5.71022	5.32553	-1.07223	0.0330301	Tle1	NM_001173433
17745313	6.05904	5.65138	-1.07213	0.0411813	Hspb3	NM_031750
17732261	6.32432	5.89912	-1.07208	0.0358904	---	---
17821318	5.85152	5.46003	-1.0717	0.0287481	Dcdc2c	NM_001195807
17614259	5.23545	4.88602	-1.07152	0.0381741	Lypd3	NM_021759
17869630	6.97238	6.50747	-1.07144	0.00936652	---	ENSRNOT00000086313
17720059	3.30422	3.08452	-1.07123	0.0254528	---	ENSRNOT00000069761
17760312	7.65329	7.14591	-1.071	0.0147947	Gbgt1	NM_023094
17618893	3.72744	3.4807	-1.07089	0.0024752	---	ENSRNOT00000076834
17786689	5.33119	4.97843	-1.07086	0.0174451	Slc6a13	NM_133623
17749203	5.69166	5.31598	-1.07067	0.0363003	LOC102549724	XM_006224186
17881939	7.30052	6.819	-1.07061	0.0148797	---	XM_006227052
17723928	7.43324	6.94303	-1.0706	0.0283199	Rax	NM_053678
17728146	6.56872	6.13701	-1.07035	0.00345605	LOC102557241	XM_008772245
17607299	6.15111	5.74688	-1.07034	0.0485115	---	---
17718771	6.6208	6.18679	-1.07015	0.00582021	Phactr1	NM_214457
17883576	5.95287	5.5634	-1.07001	0.0286879	---	---
17880827	5.57061	5.2067	-1.06989	0.0175554	---	ENSRNOT00000071785
17633279	6.22918	5.82342	-1.06968	0.0413677	Mrgprx1	NM_172158
17874712	6.17901	5.77723	-1.06955	0.0143687	RGD1560585	XM_006257604
17747907	6.01807	5.62739	-1.06942	0.0409061	Sptssb	NM_001271299
17868239	6.66779	6.2351	-1.0694	0.0333582	---	---
17798355	5.42227	5.07216	-1.06903	0.0353515	Hrct1	XM_002729475
17820132	6.47549	6.06073	-1.06843	0.0275172	Nrxn1	NM_021767
17731182	6.16212	5.76765	-1.06839	0.009415	Ntpcr	NM_001134573
17690484	6.94732	6.50341	-1.06826	0.0496082	Nsg1	NM_024128
17690185	7.07281	6.62201	-1.06808	0.000840182	Ccdc149	XM_006221768
17837290	5.51057	5.15941	-1.06806	0.042515	Samd12	NM_001130562
17603743	6.02129	5.63801	-1.06798	0.0219538	---	---
17780369	7.3148	6.8495	-1.06793	0.0351583	---	---
17791581	4.89351	4.58249	-1.06787	0.0288204	---	ENSRNOT00000085685
17878760	6.6328	6.21215	-1.06771	0.0243443	LOC102555917	XM_008758509
17793691	7.39994	6.93103	-1.06765	0.0115563	---	---
17868057	6.9225	6.4843	-1.06758	0.0132715	LOC102547811	XM_008758202
17868324	6.9225	6.4843	-1.06758	0.0132715	LOC102547811	XM_008758202
17610302	6.00466	5.62629	-1.06725	0.0122054	---	---
17715332	5.27297	4.94133	-1.06711	0.016151	Tubb2b	NM_001013886
17643476	8.23293	7.71603	-1.06699	0.00630447	LOC102550998	XM_006234663
17811841	5.9404	5.5691	-1.06667	0.0421191	Pax7	NM_001191984
17882831	5.56615	5.21908	-1.0665	0.00439648	---	NONRATT015812
17736515	5.37109	5.03658	-1.06642	0.0448452	Adamts12	NM_001106420
17797004	5.93022	5.56115	-1.06637	0.00901821	Npbwr1	NM_001014784
17838798	5.33535	5.00348	-1.06633	0.010043	Lrrc24	NM_001135896
17874481	7.67334	7.20205	-1.06544	0.0072557	---	---
17761854	5.79077	5.43556	-1.06535	0.0370975	---	---
17740490	5.70611	5.35654	-1.06526	0.0375667	LOC102550598	XM_006232816
17804305	5.50037	5.1647	-1.06499	0.040128	Casz1	XM_006225624
17845526	6.25602	5.87432	-1.06498	0.00891076	Rora	XM_008766408
17882007	5.68971	5.34283	-1.06493	0.0464145	---	NM_001085381
17675597	5.64706	5.3028	-1.06492	0.0381523	---	---
17747925	5.13628	4.82374	-1.06479	0.0378837	Si	ENSRNOT00000046681
17881381	5.30696	4.98488	-1.06461	0.0479293	---	NM_001079838
17701993	6.39908	6.01331	-1.06415	0.0425609	Klhl33	XM_002725067
17628815	6.45457	6.06773	-1.06375	0.00338723	---	---
17744705	6.30837	5.93061	-1.0637	0.0145758	Cartpt	NM_017110
17770545	5.31405	4.99647	-1.06356	0.0237795	LOC102551235	ENSRNOT00000036231
17869418	6.944	6.53031	-1.06335	0.00551579	LOC103690177	XM_008758658
17870751	4.32253	4.06579	-1.06315	0.0383819	---	GENSCAN00000032848
17832876	5.73746	5.39699	-1.06309	0.0462009	Il23a	NM_130410
17674395	6.47816	6.09512	-1.06284	0.0306773	---	---
17879302	6.21481	5.84742	-1.06283	0.00541302	LOC103694517	XM_008773575
17836079	7.04818	6.63236	-1.0627	0.0311189	RGD1306282	XM_001080995
17726987	4.82489	4.54036	-1.06267	0.00139808	---	ENSRNOT00000058894
17867707	5.99479	5.64127	-1.06267	0.0228526	---	NONRATT028202
17723996	5.2532	4.94399	-1.06254	0.0467379	---	ENSRNOT00000090528
17783099	5.4198	5.10364	-1.06195	0.0397506	Arhgef5	XM_001073085
17875847	6.28447	5.91972	-1.06162	0.0404174	Chst7	NM_207600
17644943	5.63051	5.30383	-1.06159	0.0421601	Kcnmb1	NM_019273
17749184	5.66108	5.33276	-1.06157	0.0142689	Ivl	NM_022195
17759719	6.16401	5.80677	-1.06152	0.00783015	LOC103693255	XR_594539
17864066	5.52824	5.20789	-1.06151	0.0369681	Lonrf2	XM_006226810
17600873	9.05384	8.53517	-1.06077	0.0474297	---	---
17873704	5.91164	5.57517	-1.06035	0.0101802	H2afb3	NM_001106969
17601997	6.75159	6.36741	-1.06034	0.0072493	---	---
17761856	7.16968	6.7621	-1.06027	0.034519	---	---
17692722	7.90012	7.45389	-1.05987	0.0132173	---	---
17654249	5.31801	5.01866	-1.05965	0.0402927	Prss30	NM_199371
17635422	5.76734	5.44272	-1.05964	0.0453158	Lrrc51	NM_001106284
17685434	6.73218	6.35329	-1.05964	0.00146918	Mr1	NM_001100635
17846260	6.57649	6.20864	-1.05925	0.00842914	Irak1bp1	NM_001277283
17870279	7.23888	6.83465	-1.05914	0.0107858	---	GENSCAN00000015517
17757333	6.39392	6.03925	-1.05873	0.0088929	Ccdc167	NM_001109548
17743558	5.76478	5.44556	-1.05862	0.04635	---	---
17842798	6.79332	6.41861	-1.05838	0.0117263	Igsf9b	XM_001054496
17600675	6.5839	6.22087	-1.05836	0.0203804	---	---
17610189	6.5839	6.22087	-1.05836	0.0203804	---	---
17746202	7.36834	6.96422	-1.05803	0.0421306	---	GENSCAN00000045714
17697355	5.33443	5.04191	-1.05802	0.0334488	Cd99l2	NM_134459
17799278	5.59971	5.29331	-1.05788	0.00786534	Col27a1	NM_198747
17630776	5.52344	5.22134	-1.05786	0.0143907	Cyp2s1	BC082047
17767383	5.87353	5.55302	-1.05772	0.0345596	Defb21	NM_001037512
17868123	6.95615	6.57679	-1.05768	0.0277915	LOC102547811	XM_008758202
17831723	4.76134	4.50205	-1.05759	0.0112735	LOC690142	XM_006226232
17698012	6.14765	5.81418	-1.05735	0.0433229	Peli2	NM_001107259
17868099	6.30264	5.96165	-1.0572	0.00429147	---	---
17695991	6.92144	6.54712	-1.05717	0.0398589	---	---
17839665	4.80992	4.54994	-1.05714	0.0435777	RGD1566029	XM_006226181
17606261	5.76894	5.45723	-1.05712	0.0349529	---	---
17754673	8.03355	7.60114	-1.05689	0.036728	---	ENSRNOT00000085952
17881191	6.33825	5.99726	-1.05686	0.0498576	---	RPTR-AF292560-1
17880589	6.7784	6.41449	-1.05673	0.00417577	---	NONRATT032537
17614698	7.92173	7.49789	-1.05653	0.00876986	Prx	NM_023976
17689771	9.25073	8.75584	-1.05652	0.0316669	Bend4	XM_006221735
17744450	7.33458	6.94353	-1.05632	0.0221901	---	ENSRNOT00000088791
17853371	5.57773	5.28101	-1.05619	0.00165952	Iqch	NM_001106830
17746376	6.74737	6.38952	-1.05601	0.00517511	Zc2hc1a	NM_001107661
17827113	5.87886	5.56732	-1.05596	0.0462231	---	ENSRNOT00000090020
17628681	5.67285	5.37278	-1.05585	0.0391017	---	---
17637493	5.31478	5.03367	-1.05585	0.0470999	Stx1b	NM_012700
17870159	7.01863	6.6474	-1.05585	0.012083	---	XR_349441
17606611	6.58418	6.23671	-1.05571	0.029147	---	---
17607255	6.58418	6.23671	-1.05571	0.029147	---	---
17608889	6.58368	6.23637	-1.05569	0.0346279	---	---
17608351	5.69212	5.39203	-1.05565	0.0395412	---	---
17818835	6.96007	6.5939	-1.05553	0.0217512	Zfp839	XM_006225878
17631477	6.14852	5.82575	-1.0554	0.0487956	---	---
17697062	6.83754	6.47876	-1.05538	0.00518936	Synpo2l	NM_001305138
17820856	5.71188	5.41234	-1.05535	0.0188842	Kcnk3	NM_033376
17624453	5.79659	5.49261	-1.05534	0.0274734	Trpm6	XM_006223666
17670081	6.73507	6.38216	-1.0553	0.0063516	Rtp1	NM_001105870
17870273	8.19548	7.76759	-1.05509	0.0346811	LOC685989	XM_001066079
17715650	6.5965	6.25211	-1.05508	0.0346672	Lrrc16a	NM_001191692
17757976	6.06741	5.75237	-1.05477	0.031317	Rab36	NM_001109589
17607571	6.58082	6.24008	-1.05461	0.0249743	---	---
17608989	6.58082	6.24008	-1.05461	0.0249743	---	---
17649611	4.45288	4.22241	-1.05458	0.00776629	Wfdc18	NM_133537
17697376	7.11561	6.74738	-1.05457	0.0225745	---	---
17840384	5.79719	5.49741	-1.05453	0.0230666	Nell2	NM_031070
17620486	6.11736	5.80118	-1.0545	0.0320289	---	---
17862623	5.71642	5.42123	-1.05445	0.0432214	Pgc	NM_133284
17635727	6.20753	5.8872	-1.05441	0.0274236	Olr181	NM_001001030
17833760	7.30638	6.92999	-1.05431	0.0481928	Mum1	NM_001108736
17824116	8.20623	7.78376	-1.05428	0.0356511	---	ENSRNOT00000085740
17867695	6.8041	6.45437	-1.05419	0.0161062	---	---
17796087	6.15646	5.84158	-1.0539	0.0439517	---	GENSCAN00000019543
17883091	6.98741	6.63044	-1.05384	0.00165246	---	---
17818463	7.37776	7.00413	-1.05334	0.00162918	---	ENSRNOT00000077218
17818485	7.37776	7.00413	-1.05334	0.00162918	---	ENSRNOT00000082656
17818493	7.37776	7.00413	-1.05334	0.00162918	---	ENSRNOT00000077218
17818583	7.37776	7.00413	-1.05334	0.00162918	---	ENSRNOT00000077218
17818601	7.37776	7.00413	-1.05334	0.00162918	---	ENSRNOT00000077147
17818607	7.37776	7.00413	-1.05334	0.00162918	---	ENSRNOT00000077218
17818605	7.1576	6.79517	-1.05334	0.00223289	---	ENSRNOT00000077218
17774210	6.11218	5.80373	-1.05315	0.00982461	Olr552	NM_001001055
17723019	5.17452	4.91411	-1.05299	0.0445018	---	GENSCAN00000049718
17675619	6.39782	6.07606	-1.05296	0.0321827	Mtus2	NM_001100989
17697369	6.24733	5.93319	-1.05295	0.0163841	LOC498465	XM_006227064
17687254	6.51477	6.18738	-1.05291	0.0133396	LOC103693700	XM_008769901
17876935	5.96734	5.6675	-1.0529	0.047958	LOC686031	NM_001109490
17856637	5.7247	5.43707	-1.0529	0.0474628	Ackr2	NM_078621
17759016	8.63861	8.20663	-1.05264	0.0138267	---	---
17868170	7.1692	6.81088	-1.05261	0.0290718	---	---
17818475	7.09884	6.74404	-1.05261	0.00498821	---	ENSRNOT00000091615
17818535	7.09884	6.74404	-1.05261	0.00498821	---	ENSRNOT00000077218
17747495	6.63396	6.30276	-1.05255	0.0207534	Tm4sf1	NM_001106434
17818471	7.48423	7.11109	-1.05247	0.00483214	---	ENSRNOT00000080943
17818477	7.48423	7.11109	-1.05247	0.00483214	---	ENSRNOT00000091854
17818481	7.48423	7.11109	-1.05247	0.00483214	---	ENSRNOT00000083076
17818503	7.48423	7.11109	-1.05247	0.00483214	---	ENSRNOT00000077218
17818505	7.48423	7.11109	-1.05247	0.00483214	---	ENSRNOT00000077218
17818509	7.48423	7.11109	-1.05247	0.00483214	---	ENSRNOT00000077218
17818511	7.48423	7.11109	-1.05247	0.00483214	---	ENSRNOT00000077218
17818515	7.48423	7.11109	-1.05247	0.00483214	---	ENSRNOT00000077218
17818521	7.48423	7.11109	-1.05247	0.00483214	---	ENSRNOT00000077218
17818523	7.48423	7.11109	-1.05247	0.00483214	---	ENSRNOT00000077218
17818529	7.48423	7.11109	-1.05247	0.00483214	---	ENSRNOT00000077218
17818533	7.48423	7.11109	-1.05247	0.00483214	---	ENSRNOT00000091854
17818539	7.48423	7.11109	-1.05247	0.00483214	---	ENSRNOT00000077218
17818541	7.48423	7.11109	-1.05247	0.00483214	---	ENSRNOT00000077218
17818545	7.48423	7.11109	-1.05247	0.00483214	---	ENSRNOT00000077218
17818549	7.48423	7.11109	-1.05247	0.00483214	---	ENSRNOT00000077218
17818551	7.48423	7.11109	-1.05247	0.00483214	---	ENSRNOT00000077218
17818559	7.48423	7.11109	-1.05247	0.00483214	---	ENSRNOT00000077218
17818565	7.48423	7.11109	-1.05247	0.00483214	---	ENSRNOT00000077218
17818567	7.48423	7.11109	-1.05247	0.00483214	---	ENSRNOT00000077218
17818569	7.48423	7.11109	-1.05247	0.00483214	---	ENSRNOT00000077218
17818573	7.48423	7.11109	-1.05247	0.00483214	---	ENSRNOT00000082656
17818579	7.48423	7.11109	-1.05247	0.00483214	---	ENSRNOT00000077218
17818595	7.48423	7.11109	-1.05247	0.00483214	---	ENSRNOT00000088785
17818597	7.48423	7.11109	-1.05247	0.00483214	---	ENSRNOT00000077218
17743900	7.89664	7.50341	-1.05241	0.0321399	---	NONRATT030631
17743645	6.30132	5.98808	-1.05231	0.0157947	Negr1	NM_021682
17799164	6.50825	6.18608	-1.05208	0.0186094	---	---
17601979	9.4402	8.97678	-1.05162	0.0022207	---	---
17626635	8.38594	7.97496	-1.05153	0.0128777	Adrb1	NM_012701
17624366	5.49745	5.22846	-1.05145	0.0249315	---	ENSRNOT00000064835
17649130	7.50094	7.13436	-1.05138	0.0162889	---	---
17823188	5.78997	5.50806	-1.05118	0.02988	Abcd4	NM_001013100
17674510	5.47786	5.21131	-1.05115	0.0285251	---	GENSCAN00000018884
17728592	6.63773	6.31551	-1.05102	0.0198932	LOC100359748	XR_597199
17841318	7.63285	7.26395	-1.05078	0.0314796	Krt82	NM_001008803
17600547	8.93351	8.50269	-1.05067	0.00452853	---	---
17610061	8.93351	8.50269	-1.05067	0.00452853	---	---
17870567	5.3638	5.10618	-1.05045	0.0318064	RGD1560927	NM_001109315
17707754	5.18627	4.93719	-1.05045	0.0436138	---	---
17818465	7.1417	6.79878	-1.05044	0.00149055	---	ENSRNOT00000082575
17818487	7.09053	6.75095	-1.0503	0.0134469	---	ENSRNOT00000088785
17673423	6.54576	6.23294	-1.05019	0.032752	Rimbp2	NM_001100488
17765325	6.58276	6.26889	-1.05007	0.0212724	Stard9	XM_001080099
17614552	5.511	5.24828	-1.05006	0.019589	LOC100910127	XM_006231301
17783399	6.83067	6.50604	-1.0499	0.0344588	Gimap8	NM_001033923
17878974	6.07073	5.78312	-1.04973	0.00862959	Rab9b	NM_001109018
17818499	7.5702	7.213	-1.04952	0.00834525	---	ENSRNOT00000077218
17818575	7.5702	7.213	-1.04952	0.00834525	---	ENSRNOT00000077218
17765071	7.04831	6.71632	-1.04943	0.0150543	Dll4	NM_001107760
17846985	6.42346	6.12165	-1.0493	0.0128586	Amotl2	NM_031717
17881479	5.90359	5.62681	-1.04919	0.0388835	---	---
17881707	5.90359	5.62681	-1.04919	0.0388835	---	---
17669869	6.91331	6.59017	-1.04903	0.00426162	Mfi2	NM_001105872
17661741	7.50034	7.15	-1.049	0.0144954	Mpp3	NM_053668
17870248	7.59427	7.23979	-1.04896	0.042559	---	---
17753402	6.42289	6.12354	-1.04889	0.0117965	LOC499407	NM_001047939
17657249	6.07594	5.79343	-1.04876	0.00769906	---	GENSCAN00000016912
17818469	7.18296	6.85002	-1.0486	0.00459229	---	ENSRNOT00000077147
17818525	6.34874	6.05512	-1.04849	0.0142193	---	Bsr
17771225	5.90921	5.63617	-1.04844	0.0248688	Fibcd1	NM_001107829
17603957	6.06731	5.78721	-1.0484	0.0489676	---	---
17853768	5.74589	5.48099	-1.04833	0.0482649	Foxb1	NM_001013248
17643262	7.80636	7.44802	-1.04811	0.0274376	LOC100912948	XM_006220557
17803920	5.77944	5.51479	-1.04799	0.0217322	Fam131c	XM_006225588
17818543	7.42895	7.09067	-1.04771	0.0308433	---	ENSRNOT00000077218
17851359	6.21065	5.92945	-1.04742	0.0337263	Olr1330	NM_001000476
17881116	5.15744	4.924	-1.04741	0.0336421	---	---
17703427	4.92062	4.6985	-1.04728	0.0325444	---	ENSRNOT00000090169
17735683	8.42524	8.04524	-1.04723	0.0473615	Pde4d	NM_001113328
17661120	6.93658	6.62425	-1.04715	0.0333782	---	GENSCAN00000034862
17661122	6.93658	6.62425	-1.04715	0.0333782	---	GENSCAN00000034862
17872155	4.92214	4.70059	-1.04713	0.0196635	---	---
17818457	7.42458	7.0911	-1.04703	0.0184163	---	ENSRNOT00000082946
17781921	6.29539	6.01299	-1.04697	0.0188033	Fscn3	NM_001004232
17764784	5.66151	5.4078	-1.04692	0.0478994	---	GENSCAN00000044393
17868890	7.88048	7.52766	-1.04687	0.0298082	LOC691712	XM_006255384
17818555	7.55332	7.21531	-1.04685	0.0221516	---	ENSRNOT00000077218
17612204	7.03903	6.72474	-1.04674	0.0144903	---	---
17703511	6.81678	6.51254	-1.04672	0.0468101	Atp8a2	XM_003751492
17644009	7.07344	6.75838	-1.04662	0.0426677	Nlrc3	XM_006220565
17606367	7.71938	7.37703	-1.04641	0.00280452	---	---
17852869	6.55758	6.26696	-1.04637	0.0301899	Snx33	NM_001127488
17608465	6.62367	6.33036	-1.04633	0.0271782	---	---
17788532	6.74063	6.44239	-1.04629	0.0307327	---	ENSRNOT00000081923
17868054	8.39556	8.02434	-1.04626	0.0136493	LOC363337	NM_001014221
17764228	7.86694	7.51918	-1.04625	0.0256861	Alx4	NM_001106553
17655236	4.75722	4.54721	-1.04618	0.0478453	Smim23	NM_001108271
17801894	8.29036	7.92503	-1.0461	0.0264324	---	---
17867711	6.64103	6.35089	-1.04569	0.015477	LOC102556572	XM_006227087
17870281	6.64103	6.35089	-1.04569	0.015477	LOC102556572	XM_006227087
17797275	6.74507	6.4507	-1.04563	0.0442179	RGD1559441	XM_006225209
17867521	8.4404	8.07228	-1.0456	0.0300497	LOC363337	NM_001014221
17883085	7.09047	6.78214	-1.04546	0.0189024	---	---
17862473	7.38261	7.0653	-1.04491	0.00493144	Kcnh8	NM_145095
17864351	5.44884	5.21508	-1.04483	0.0354582	---	GENSCAN00000010653
17628793	8.03973	7.69519	-1.04477	0.0171946	---	---
17789285	7.20545	6.90111	-1.0441	0.0289521	---	GENSCAN00000010705
17623660	7.91682	7.58326	-1.04399	0.0156094	Slc22a6	NM_017224
17672343	6.93355	6.64152	-1.04397	0.0269894	Azgp1	NM_012826
17602917	6.21479	5.95321	-1.04394	0.0412769	---	---
17868091	8.83338	8.46172	-1.04392	0.0485872	LOC501346	XR_597211
17869444	7.19873	6.89586	-1.04392	0.0455887	---	NONRATT004056
17879768	5.86947	5.62505	-1.04345	0.0220602	RGD1559982	XM_006223395
17829984	7.12648	6.83026	-1.04337	0.0245461	---	ENSRNOT00000078728
17849437	7.87273	7.54645	-1.04324	0.0283232	Yap1	NM_001034002
17736014	6.90057	6.61459	-1.04324	0.00372289	---	GENSCAN00000025107
17869457	7.01724	6.72852	-1.04291	0.0485234	---	---
17868961	7.83024	7.51283	-1.04225	0.0113317	---	---
17868212	9.20349	8.8305	-1.04224	0.0264806	LOC689453	XM_006255043
17665130	7.78436	7.47027	-1.04205	0.025602	Olr1546	NM_001001106
17612199	7.20132	6.91399	-1.04156	0.0342352	---	---
17661124	7.57743	7.2757	-1.04147	0.037147	---	GENSCAN00000034862
17668442	6.39828	6.14517	-1.04119	0.0266023	Filip1l	XM_006221096
17705217	8.36679	8.03651	-1.0411	0.0231426	Sox21	XM_006222076
17787813	7.6366	7.33777	-1.04073	0.017148	Pde6h	NM_053688
17679419	7.29404	7.00877	-1.0407	0.0353918	---	---
17669860	7.38227	7.09386	-1.04066	0.014062	Pigz	XM_008768781
17813704	6.04918	5.81478	-1.04031	0.00999467	Plekhh2	NM_001191770
17710343	7.55618	7.26437	-1.04017	0.0347056	---	GENSCAN00000030970
17612228	8.82836	8.48959	-1.0399	0.0222594	---	---
17625649	5.2044	5.00548	-1.03974	0.0301076	Hpse2	NM_001135762
17879645	7.63742	7.34642	-1.03961	0.0426516	Mir465	NR_032762
17787975	6.46471	6.21982	-1.03937	0.0481688	---	---
17626561	8.95845	8.62468	-1.0387	0.0243401	Tcf7l2	XM_008760555
17615374	8.19785	7.89249	-1.03869	0.00452303	RGD1560986	XM_008759244
17869617	7.27066	7.0015	-1.03844	0.00995263	LOC102556572	XM_006227087
17606337	7.49318	7.21688	-1.03829	0.0424177	---	---
17660702	7.46189	7.18715	-1.03823	0.0382306	Cacnb1	NM_017346
17883191	8.57866	8.26383	-1.0381	0.0021144	---	ENSRNOT00000045499
17800846	6.88435	6.6319	-1.03807	0.0173439	Mir761	NR_032765
17689947	7.86917	7.5808	-1.03804	0.0131367	Mir328b	NR_037399
17698233	6.74601	6.50174	-1.03757	0.0475795	---	GENSCAN00000058642
17869398	7.20084	6.94175	-1.03732	0.0449915	LOC103690993	XR_589988
17715843	5.37172	5.18077	-1.03686	0.0490043	Olr1658	NM_001000105
17681407	7.20375	6.94854	-1.03673	0.00124932	Mir214	NR_031927
17683261	6.33782	6.11869	-1.03581	0.0493122	Irf6	NM_001108859
17681943	6.10278	5.89264	-1.03566	0.0492406	Tstd1	XM_002728028
17739843	9.02057	8.71396	-1.03519	0.0287864	Mex3a	XM_006224180
17868566	7.7605	7.49705	-1.03514	0.0127211	---	GENSCAN00000052431
17797848	7.24301	6.99948	-1.03479	0.0363348	Rragd	NM_001106641
17604061	8.48311	8.19797	-1.03478	0.00482016	---	---
17732022	7.94884	7.68215	-1.03472	0.000911522	LOC100360478	XM_006222684
17867524	7.48479	7.23579	-1.03441	0.0485743	LOC501421	XM_008758253
17697815	7.16887	6.93324	-1.03399	0.0117736	LOC498465	XM_006251668
17798817	7.15388	6.91923	-1.03391	0.0449888	---	ENSRNOT00000087500
17869436	7.53687	7.2906	-1.03378	0.037027	LOC501297	XM_008772246
17616529	6.96396	6.73924	-1.03334	0.0395029	Ccdc114	NM_001126277
17730555	6.69892	6.48467	-1.03304	0.0227077	Adad2	XM_002725395
17603185	8.89167	8.61071	-1.03263	0.0255558	---	---
17603935	7.10496	6.88087	-1.03257	0.038592	---	---
17755324	6.45674	6.25437	-1.03236	0.0212915	---	---
17702240	8.06877	7.81725	-1.03218	0.0126049	---	GENSCAN00000019612
17850566	7.97453	7.72749	-1.03197	0.0149582	---	---
17600799	7.20477	6.98284	-1.03178	0.0358484	---	---
17774168	10.9815	10.6467	-1.03145	0.0406485	Olr522	NM_001000562
17600343	9.53709	9.24802	-1.03126	0.0394963	---	---
17705599	7.42707	7.21	-1.03011	0.0261887	---	---
17870294	8.10336	7.86887	-1.0298	0.0274658	---	---
17796611	7.95235	7.72305	-1.02969	0.00417486	LOC102551296	XM_006234031
17790401	8.22524	7.99597	-1.02867	0.0285979	Podxl	NM_138848
17868954	8.3782	8.14595	-1.02851	0.0338511	---	---
17643381	7.09028	6.89532	-1.02827	0.0497291	---	ENSRNOT00000080445
17868159	8.17962	7.95758	-1.0279	0.0483913	LOC363337	NM_001014221
17883189	8.99526	8.75633	-1.02729	0.0297756	---	ENSRNOT00000047162
17868311	8.7065	8.47733	-1.02703	0.0186623	LOC102557302	ENSRNOT00000040545
17868457	7.36225	7.16862	-1.02701	0.0234151	---	---
17870903	8.94772	8.71429	-1.02679	0.0144794	LOC307727	NM_001047882
17863475	5.90465	5.75147	-1.02663	0.0334387	Fam135a	NM_001134597
17689970	9.16858	8.93559	-1.02607	0.0221462	RGD1564665	XM_008758247
17868967	9.49651	9.25519	-1.02607	0.0467057	LOC100912852	XM_006227129
17867518	9.91603	9.67323	-1.0251	0.0215994	---	NONRATT028202
17870166	6.92244	6.75713	-1.02446	0.0398914	LOC501349	XM_008772459
17628078	6.11999	5.97447	-1.02436	0.0332477	LOC102556805	XR_598630
17790335	7.76436	7.58136	-1.02414	0.0427631	---	---
17697338	8.27667	8.08385	-1.02385	0.0480428	LOC102547212	XM_006221886
17810522	9.81949	9.59181	-1.02374	0.00659507	---	---
17697415	7.92319	7.74304	-1.02327	0.042119	LOC102547212	XM_006221886
17869798	9.1963	8.99193	-1.02273	0.0397521	MGC116197	NM_001025755
17682865	8.6579	8.46882	-1.02233	0.0267971	Tlr5	NM_001145828
17869635	8.47746	8.293	-1.02224	0.0223335	---	---
17784234	8.84675	8.67712	-1.01955	0.0181465	---	ENSRNOT00000086526
17851159	7.11863	6.98668	-1.01889	0.0474887	---	---
17857041	9.23277	9.06548	-1.01845	0.0409057	RGD1564665	XM_008758247
17761838	9.66956	9.501	-1.01774	0.0437613	---	---
17882639	7.713	7.59458	-1.01559	0.0326635	---	NM_198131
17780051	9.7779	9.64324	-1.01396	0.0304023	---	---
17655949	11.3108	11.4265	1.01023	0.0473023	Hnrnpab	NM_031330
17866937	9.70071	9.80408	1.01066	0.0378081	Rab31	NM_145094
17818867	9.68661	9.79234	1.01092	0.0499523	Rcor1	NM_001305463
17625216	9.67244	9.77814	1.01093	0.0399158	Tnks2	NM_001107607
17856125	10.4819	10.5987	1.01114	0.0226337	Pdcd6ip	NM_001029910
17686353	9.83019	9.94931	1.01212	0.0495562	Mgst3	NM_001191594
17743680	9.31934	9.43958	1.0129	0.045685	Ankrd13c	NM_001191570
17721159	10.6477	10.7875	1.01313	0.0260563	Pip4k2a	NM_053926
17738875	9.93497	10.0662	1.01321	0.0358045	Gmps	NM_001024754
17790274	10.185	10.3197	1.01323	0.0473418	Ube2h	NM_001172127
17761026	11.0632	11.2167	1.01388	0.0325048	Ppp2r4	NM_001108577
17675646	9.61923	9.75312	1.01392	0.0158109	Pan3	XM_001068449
17684362	10.3769	10.5227	1.01405	0.0398557	Tmem183a	NM_001013871
17726620	8.39791	8.51656	1.01413	0.037203	Fbxo38	XM_006222582
17681333	9.40947	9.54329	1.01422	0.0370977	Cenpl	NM_001033061
17680295	11.1797	11.3411	1.01443	0.0362517	Adipor1	NM_207587
17745609	8.61956	8.74513	1.01457	0.0416752	Card6	NM_001106413
17831195	9.18345	9.31993	1.01486	0.0365062	Pacsin2	NM_130740
17664014	11.1511	11.3183	1.01499	0.0185209	Arhgdia	NM_001007005
17779587	10.307	10.4634	1.01518	0.0195429	Ube2v1	NM_001110345
17626005	9.9618	10.114	1.01528	0.0198816	Btrc	NM_001007148
17622327	10.1062	10.2607	1.01529	0.0353937	Ap2a2	NM_031008
17880710	11.0654	11.2365	1.01546	0.0186442	---	NM_172036
17736034	9.55919	9.70863	1.01563	0.0469562	Oxct1	NM_001127580
17700812	9.94043	10.0973	1.01578	0.0394368	---	---
17686220	9.81669	9.97294	1.01592	0.039361	Dcaf6	NM_001305159
17624222	9.30124	9.45038	1.01604	0.00452676	Patl1	NM_001108520
17786674	9.61041	9.76518	1.0161	0.0259864	Bcl2l13	NM_001107885
17832394	10.4968	10.6669	1.01621	0.04845	---	---
17750591	9.60616	9.76282	1.01631	0.0333144	Sars	NM_001007606
17801842	10.202	10.3688	1.01635	0.03053	Pabpc4	NM_001100538
17719628	9.53297	9.69033	1.01651	0.0406865	---	ENSRNOT00000089746
17780993	10.6227	10.7984	1.01654	0.0278683	LOC103690020	XM_006235962
17787095	10.8236	11.0029	1.01656	0.0102434	---	---
17813889	10.96	11.1436	1.01675	0.0107814	Kpna2	NM_053483
17847355	8.18433	8.32287	1.01693	0.0091396	Timm8a1	ENSRNOT00000067683
17720794	9.07217	9.22605	1.01696	0.0489997	Sephs1	NM_001104630
17742873	10.5128	10.6915	1.017	0.00863733	---	---
17825446	10.11	10.283	1.01711	0.0188675	Prim1	NM_001008768
17830732	10.2385	10.4139	1.01714	0.0159665	Atf4	NM_024403
17673101	9.47319	9.63577	1.01716	0.0472568	Eif4h	NM_001006957
17662569	10.7415	10.9272	1.01729	0.0112278	Kpna2	NM_053483
17774846	10.0716	10.2466	1.01738	0.0395268	Api5	NM_001127379
17648519	9.61539	9.78694	1.01784	0.0444166	Prpf8	NM_001191590
17844444	8.90197	9.06129	1.0179	0.0351518	Sin3a	NM_001108761
17877111	9.5652	9.74081	1.01836	0.0496432	Rbbp7	NM_031816
17847712	10.3055	10.4955	1.01843	0.043433	Impdh2	NM_199099
17674442	9.44421	9.61853	1.01846	0.0418837	Dynll1	ENSRNOT00000014910
17817427	9.20159	9.37147	1.01846	0.0397415	Isca2	NM_001109278
17698682	9.19812	9.36801	1.01847	0.011574	Pabpn1	NM_001135008
17714600	8.16208	8.31284	1.01847	0.00386141	Sptlc1	NM_001108406
17801167	10.142	10.3295	1.0185	0.0363085	Uqcrh	NM_001009480
17821442	9.05731	9.22488	1.0185	0.0153896	Cbll1	NM_001108018
17627802	9.79759	9.98214	1.01884	0.0106671	Sgk1	NM_001193568
17742972	8.70586	8.86988	1.01884	0.0385759	Lamtor3	NM_001008375
17870602	10.5888	10.7884	1.01885	0.0427709	---	FQ221172
17617375	8.81769	8.98427	1.01889	0.0490385	Snrpa1	NM_001271323
17784411	9.45879	9.63898	1.01905	0.0257601	Immt	NM_001034928
17809656	9.23112	9.40742	1.0191	0.0489794	Kif2c	NM_001085369
17618702	8.63371	8.79894	1.01914	0.0200344	C2cd3	NM_001191602
17695569	10.4596	10.662	1.01935	0.0415564	Ctbp1	NM_019201
17760561	7.9055	8.05874	1.01938	0.0123921	Mrps2	NM_001108576
17880677	9.82814	10.0187	1.01939	0.0126088	---	GENSCAN00000041304
17757020	9.20328	9.38177	1.01939	0.00981825	Bak1	NM_053812
17795067	9.15519	9.33305	1.01943	0.029623	Ndufa9	NM_001100752
17643505	9.75591	9.94547	1.01943	0.0205845	Rsl1d1	NM_001008876
17719969	9.37034	9.55274	1.01946	0.0215551	Epc1	NM_001309462
17878786	8.0415	8.1981	1.01947	0.0489681	Timm8a1	NM_053370
17787484	8.52456	8.69059	1.01948	0.0362957	Foxm1	NM_031633
17861781	9.46498	9.64951	1.0195	0.0083043	Ppp1r7	NM_001009825
17772646	9.25596	9.43667	1.01952	0.0381859	Psmd14	NM_001025689
17801108	7.97295	8.13024	1.01973	0.0433636	Atpaf1	NM_001107959
17710636	10.1784	10.3801	1.01981	0.0102333	Rab8a	NM_053998
17832397	10.3362	10.5428	1.01999	0.0336643	---	---
17704895	8.63945	8.81388	1.02019	0.0482281	Dis3	NM_001127483
17746504	9.66731	9.86353	1.0203	0.0389787	Gyg1	NM_031043
17880947	8.44279	8.61455	1.02034	0.0498119	---	ENSRNOT00000051828
17651251	9.36224	9.55273	1.02035	0.0474016	Vps25	NM_001173451
17712930	9.77865	9.97789	1.02038	0.0251089	Tfdp1	NM_001025718
17648071	9.02685	9.21194	1.02051	0.0388329	Ube2g1	NM_022690
17787848	9.34922	9.5416	1.02058	0.0269187	Strap	NM_001011969
17685636	8.69012	8.869	1.02058	0.0442013	Fam20b	NM_001107187
17645655	9.77854	9.97992	1.02059	0.0121631	Sar1b	NM_001009622
17726859	8.89355	9.07763	1.0207	0.0336245	Afg3l2	NM_001134864
17881623	10.2619	10.4744	1.02071	0.0298473	---	XM_001059949
17792864	8.22794	8.399	1.02079	0.0475481	Snrnp27	NM_001108636
17880996	8.51201	8.68948	1.02085	0.0481444	Tnfaip8l1	XM_006226692
17733489	9.45635	9.65401	1.0209	0.0160974	Sf3b3	NM_001106187
17628896	8.97843	9.16733	1.02104	0.0294796	Phf10	NM_001024747
17691757	9.05679	9.24747	1.02105	0.0245676	Sertad2	NM_001024903
17836191	8.38927	8.56676	1.02116	0.0152069	Rassf3	NM_001108747
17727983	9.64832	9.8527	1.02118	0.0490977	Amfr	XM_006222665
17661517	8.86212	9.04999	1.0212	0.0233076	Stat5b	NM_022380
17795115	9.60228	9.80691	1.02131	0.0374645	Ccnd2	NM_022267
17761845	8.92584	9.11607	1.02131	0.0422342	---	---
17856428	9.09497	9.28962	1.0214	0.0389909	Myd88	NM_198130
17644193	9.25633	9.45473	1.02143	0.0362914	Rnps1	NM_001011890
17648607	10.107	10.3237	1.02144	0.0127806	Pitpna	NM_017231
17675773	8.4151	8.59636	1.02154	0.0367868	Zfp655	NM_001008362
17703977	8.988	9.18201	1.02159	0.0134389	Ppp2r2a	NM_053999
17813952	8.33496	8.51509	1.02161	0.0319028	Msh6	XM_006225670
17840441	9.1364	9.33451	1.02168	0.0416356	Slc38a1	NM_138832
17856558	9.53547	9.74229	1.02169	0.0267326	Snrpe	NM_001271237
17806462	8.81361	9.00593	1.02182	0.0300423	Smu1	NM_057195
17643443	8.07893	8.25594	1.02191	0.0310726	Parn	NM_001270415
17648443	8.53553	8.72258	1.02191	0.023593	Tsr1	XM_002724518
17678040	8.36286	8.54626	1.02193	0.0187631	Naa25	NM_001047900
17880740	9.06778	9.26718	1.02199	0.0477313	---	ENSRNOT00000057772
17818265	8.85337	9.04876	1.02207	0.0265279	Ccnk	NM_001109672
17756409	8.34022	8.52521	1.02218	0.0469827	Abhd16a	NM_212531
17715602	7.52665	7.69403	1.02224	0.0446218	Mrs2	NM_024001
17739846	8.97671	9.17634	1.02224	0.0398921	Ubqln4	NM_001107688
17669270	7.64075	7.81088	1.02227	0.0218394	Iqcb1	NM_001107092
17774852	10.0557	10.2808	1.02239	0.0106324	---	---
17773206	9.03	9.23257	1.02243	0.0401959	Ola1	NM_001033927
17695453	9.91999	10.1429	1.02247	0.016788	Rnf4	NM_019182
17880952	9.94965	10.1738	1.02253	0.025749	---	ENSRNOT00000080060
17881020	8.76698	8.96475	1.02256	0.032793	LOC313310	XR_005465
17785314	8.27266	8.45961	1.0226	0.0499064	Ruvbl1	NM_147177
17657776	10.5651	10.8044	1.02265	0.0426525	Eif4a1	NM_199372
17766853	8.81368	9.01388	1.02271	0.0267895	Sec23b	NM_001277235
17810783	8.98622	9.19094	1.02278	0.0103054	Rbbp4	NM_001107912
17844719	7.89669	8.07696	1.02283	0.0420666	Parp6	NM_001106828
17836087	9.01856	9.22528	1.02292	0.0227695	Cand1	NM_054004
17881651	8.94733	9.15251	1.02293	0.0313545	---	XM_006241502
17739358	8.93438	9.13965	1.02298	0.0174972	Plrg1	NM_021757
17718061	9.33539	9.55091	1.02309	0.0323805	Ddx46	NM_139098
17645712	9.58135	9.80269	1.0231	0.00940695	Vdac1	XM_006246346
17882285	7.97992	8.16428	1.0231	0.0252329	---	NM_001271194
17690952	9.52165	9.74198	1.02314	0.0301024	---	---
17875780	10.11	10.3441	1.02315	0.0492233	---	---
17710661	8.04215	8.22856	1.02318	0.0336635	Zfp617	XM_006222163
17701751	9.89067	10.1207	1.02326	0.0275166	LOC103693375	XM_008768019
17877129	9.89067	10.1207	1.02326	0.0275166	LOC103690821	XM_008758398
17802931	9.96577	10.1979	1.0233	0.0415684	Stmn1	NM_017166
17749651	8.29661	8.49151	1.02349	0.0311941	Polr3c	NM_001012081
17880184	9.65033	9.87709	1.0235	0.00901348	---	ENSRNOT00000086471
17756066	6.95707	7.12152	1.02364	0.0364422	Trim26	NM_001011665
17865825	8.79297	9.00127	1.02369	0.0450942	Hdac1l	NM_053446
17676709	8.80904	9.01788	1.02371	0.0423047	Gnb2	NM_031037
17778148	8.71021	8.91701	1.02374	0.0295482	Acss1	NM_001106524
17699046	10.6198	10.872	1.02375	0.0308485	Mcpt8l2	NM_001135010
17844231	9.34109	9.56341	1.0238	0.011446	Idh3a	NM_053638
17757383	9.53034	9.75744	1.02383	0.0287613	Glo1	NM_207594
17695024	8.71332	8.92122	1.02386	0.0398846	Lyar	NM_001011911
17667934	8.87706	9.08949	1.02393	0.0163393	Gart	NM_001011899
17842073	8.50186	8.70534	1.02393	0.0318089	Mre11a	NM_022279
17841529	8.72164	8.93069	1.02397	0.0439123	Aaas	NM_001106795
17813333	6.85571	7.02024	1.024	0.032421	B3galt6	NM_001106699
17618669	8.49487	8.69913	1.02405	0.0364653	Pgm2l1	NM_001109454
17818342	9.30561	9.52943	1.02405	0.0355134	Yy1	NM_173290
17784562	8.48573	8.69011	1.02409	0.024362	Suclg1	NM_053752
17862452	9.32771	9.55269	1.02412	0.045903	Rab5a	NM_022692
17681065	7.22158	7.39617	1.02418	0.0483289	Acbd6	NM_001011906
17690970	8.20921	8.40869	1.0243	0.0490716	Patz1	NM_001107231
17882395	8.17429	8.37319	1.02433	0.0196031	---	XM_001054866
17814041	9.12062	9.34304	1.02439	0.02796	Dpy30	NM_001170545
17767891	9.41223	9.64229	1.02444	0.0437093	Raly	ENSRNOT00000023429
17880804	10.6439	10.9041	1.02445	0.0489731	---	GENSCAN00000039222
17600863	7.21223	7.38907	1.02452	0.0280592	---	---
17858107	7.31577	7.49565	1.02459	0.0171935	---	GENSCAN00000013610
17678561	8.5755	8.7864	1.02459	0.0359285	Rab35	NM_001013046
17826264	9.33299	9.56257	1.0246	0.0128253	---	---
17716029	7.82532	8.01821	1.02465	0.0145655	Gabpb1l	NM_001135015
17863340	9.1478	9.37411	1.02474	0.0492919	Mcm3	NM_001191805
17684237	9.33542	9.56655	1.02476	0.0356901	---	GENSCAN00000026696
17641812	8.41172	8.62077	1.02485	0.0335024	Exoc6	NM_019277
17739259	8.42885	8.63855	1.02488	0.0276183	Ppid	NM_001004279
17755788	8.82961	9.04977	1.02493	0.0278557	Prep	NM_031324
17676301	8.3861	8.59552	1.02497	0.0299971	Mafk	NM_145673
17823590	8.7954	9.01558	1.02503	0.0377183	---	GENSCAN00000045464
17670196	8.60222	8.81803	1.02509	0.0462396	Senp2	NM_023989
17879813	9.18674	9.4175	1.02512	0.0416074	---	---
17635086	9.45281	9.69048	1.02514	0.030739	Acer3	XM_001065019
17811689	10.694	10.963	1.02515	0.0448268	---	---
17792739	8.34451	8.55466	1.02518	0.0496164	Spr	NM_019181
17714914	8.62042	8.83912	1.02537	0.0243435	Tpmt	NM_001079531
17708637	9.41374	9.65265	1.02538	0.0431121	Rps28	FQ222594
17773353	9.52287	9.7649	1.02542	0.0217629	Nfe2l2	NM_031789
17728080	9.5998	9.844	1.02544	0.00806982	Mcm5	NM_001106170
17712704	10.9248	11.2036	1.02553	0.0468369	RatNP-3b	NM_001079898
17740110	9.15045	9.38606	1.02575	0.025379	Shc1	NM_001164060
17658088	10.0039	10.2617	1.02577	0.0432359	Alox15	NM_031010
17718422	8.36626	8.58224	1.02582	0.0464986	Secisbp2	NM_024002
17635241	8.53305	8.75359	1.02585	0.0293938	Ppme1	NM_001191838
17670348	9.37384	9.61711	1.02595	0.0485132	LOC100912571	XM_006248555
17704075	8.81767	9.04702	1.02601	0.0388892	RGD1563220	ENSRNOT00000048783
17692547	8.52144	8.74321	1.02602	0.049108	Mtf2	NM_001100898
17829860	7.30993	7.50071	1.0261	0.0454121	Dennd3	XM_001072997
17861254	8.70556	8.93304	1.02613	0.048769	Inpp5d	NM_019311
17646073	8.32325	8.54139	1.02621	0.0273929	Cnot8	NM_001008382
17794626	9.8848	10.1446	1.02629	0.0308548	Slc2a3	NM_017102
17767400	9.8055	10.0634	1.0263	0.0326197	Hm13	NM_001107789
17880197	8.98668	9.22342	1.02634	0.0428588	---	ENSRNOT00000034515
17699035	10.2668	10.5375	1.02637	0.00775253	Mcpt8	NM_021598
17668447	8.51515	8.74006	1.02641	0.044739	Tomm70a	NM_212519
17700917	8.79499	9.02784	1.02648	0.0393391	Vdac2	NM_031354
17827299	6.98277	7.16834	1.02658	0.0337906	LOC691921	NM_001135566
17663217	10.3752	10.6512	1.0266	0.0147759	Sumo2	ENSRNOT00000004867
17674355	8.41138	8.63516	1.0266	0.0150191	---	---
17640125	8.03571	8.24972	1.02663	0.0197228	Naa40	NM_001108518
17611493	7.19512	7.38677	1.02663	0.0277259	Armt1	NM_001017447
17611410	7.38664	7.58394	1.02671	0.0302016	---	XM_008758139
17787249	8.51714	8.7447	1.02672	0.0136312	Nop2	NM_001191785
17874214	7.94265	8.15565	1.02682	0.0105001	Prps1	NM_017243
17713271	7.56098	7.76432	1.02689	0.0379624	Abhd13	NM_001271072
17882397	7.40043	7.59956	1.02691	0.0464726	---	NM_001271596
17808937	8.41003	8.63652	1.02693	0.0486063	Slc35d1	NM_001106668
17809473	8.11566	8.33465	1.02698	0.0186475	Lrrc41	NM_001009710
17627328	7.89795	8.11178	1.02707	0.035891	Ltv1	NM_001014157
17703146	10.358	10.6386	1.02709	0.0481815	Ctsg	NM_001106041
17624845	8.05562	8.27413	1.02712	0.0161427	Rcl1	NM_001013152
17788530	9.94695	10.2168	1.02713	0.035446	RGD1565588	XR_591997
17702195	7.8729	8.08693	1.02719	0.0269146	Mettl3	NM_001024794
17817438	8.89417	9.13701	1.0273	0.0137799	---	---
17806710	10.0498	10.3247	1.02735	0.0250357	---	---
17799173	7.79111	8.00425	1.02736	0.0476217	Slc31a2	NM_001033693
17662418	9.05396	9.30256	1.02746	0.0181196	Smarcd2	NM_031983
17855106	8.40038	8.63136	1.0275	0.0439935	RGD1310507	NM_001047891
17734484	7.30343	7.50448	1.02753	0.019618	Exoc8	NM_139043
17809280	7.82327	8.04007	1.02771	0.0180916	Btf3l4	XM_003754075
17796627	10.0557	10.3344	1.02772	0.0285945	Rpn1	NM_013067
17622069	9.55075	9.81598	1.02777	0.0083998	Psmd13	NM_001108925
17837437	9.40522	9.66933	1.02808	0.0277203	---	---
17771839	9.86085	10.1384	1.02814	0.0257485	Psmb7	NM_053532
17826513	8.47399	8.71256	1.02815	0.0375965	---	---
17767063	7.41773	7.6274	1.02827	0.0419859	Gzf1	NM_001107788
17747388	8.19774	8.43008	1.02834	0.0097866	Exosc8	NM_001106432
17709313	7.99831	8.22543	1.0284	0.0163956	Pcid2	NM_001169144
17841591	8.86691	9.11888	1.02842	0.0159629	Calcoco1	NM_139190
17855805	9.24607	9.50934	1.02847	0.00220479	Arih2	NM_001012275
17612693	8.83449	9.08605	1.02847	0.0431605	Lilrb3a	NM_001313924
17725351	8.83216	9.08452	1.02857	0.014958	---	GENSCAN00000008246
17859277	8.5669	8.8117	1.02858	0.032952	Hspe1	NM_012966
17766344	8.61427	8.86062	1.0286	0.0103359	Itpa	NM_001107774
17837849	9.38017	9.6486	1.02862	0.00396738	---	---
17811546	7.46611	7.68042	1.0287	0.0300288	---	---
17873337	8.29822	8.53644	1.02871	0.0177621	Pin4	XM_003752069
17748771	7.73639	7.95912	1.02879	0.0314604	Dap3	NM_001011950
17774801	8.96178	9.21988	1.0288	0.0353579	Hsd17b12	NM_032066
17683704	8.41623	8.65945	1.0289	0.0461377	Ddx18	NM_001006996
17741572	7.59393	7.81351	1.02892	0.0247538	Ptpn22	NM_001106460
17774944	7.59879	7.81875	1.02895	0.0442413	Pdhx	NM_001044242
17810524	10.3607	10.6608	1.02897	0.00526284	---	---
17651036	8.58101	8.83027	1.02905	0.0327893	Eif1	NM_001105837
17709842	8.5569	8.8058	1.02909	0.0194745	Gnl3	NM_175580
17721922	7.56507	7.78553	1.02914	0.0427405	---	---
17787589	8.19637	8.43536	1.02916	0.0236256	Gabarapl1	NM_001044294
17798497	7.62223	7.84551	1.02929	0.0187302	Dcaf10	NM_001107935
17664422	7.7227	7.94896	1.0293	0.0451368	Jam2	NM_001034004
17806705	9.84837	10.1371	1.02932	0.00429438	---	---
17811063	7.91225	8.14561	1.02949	0.0131675	Ythdf2	NM_001047099
17791693	8.7669	9.02567	1.02952	0.0115584	Snca	NM_019169
17804509	8.15874	8.39957	1.02952	0.0254391	Nol9	XM_001076353
17845285	8.08935	8.32819	1.02952	0.0241296	Csnk1g1	NM_022288
17773117	8.34937	8.59631	1.02958	0.00627116	Mettl5	NM_001114181
17839408	8.26569	8.51036	1.0296	0.0427448	Desi1	NM_001025703
17834717	8.20775	8.45108	1.02965	0.0314432	Txnrd1	NM_031614
17819943	8.32321	8.57075	1.02974	0.0251795	Lrpprc	NM_001008519
17882483	8.39607	8.64579	1.02974	0.00889025	---	XM_001070398
17688866	9.736	10.0273	1.02992	0.00391215	---	---
17881142	7.99178	8.23193	1.03005	0.0400373	---	ENSRNOT00000046787
17765918	8.70967	8.97202	1.03012	0.0469559	Stard7	NM_001106503
17673103	9.26508	9.54426	1.03013	0.00404695	---	---
17861208	7.92817	8.16743	1.03018	0.0162779	Gigyf2	XM_003754543
17702990	8.08325	8.32738	1.0302	0.004555	Nedd8	NM_138878
17824592	8.02412	8.26691	1.03026	0.0480674	Cdca4	NM_001037214
17683539	9.78781	10.084	1.03026	0.0398258	LOC680491	XR_146567
17816852	7.52515	7.75307	1.03029	0.0418975	Fntb	NM_172034
17714621	7.0675	7.28167	1.0303	0.0151606	Nfil3	NM_053727
17687472	6.88804	7.09707	1.03035	0.0160689	Rrp15	NM_001009702
17857344	6.6913	6.89463	1.03039	0.0260874	Cul9	NM_001191582
17787705	6.4739	6.67063	1.03039	0.041064	Crebl2	NM_001015027
17691436	8.13604	8.38368	1.03044	0.0406922	Ccm2	NM_001126275
17732381	8.37261	8.62789	1.03049	0.00707794	Tnpo2	NM_001107166
17882149	7.40734	7.63348	1.03053	0.0423935	---	NM_001131014
17777215	8.47812	8.7373	1.03057	0.047574	Snrpb	NM_134358
17828791	8.27392	8.5275	1.03065	0.0213174	---	---
17690711	8.06038	8.30809	1.03073	0.0218661	Lrpap1	NM_001169113
17708572	8.45715	8.71726	1.03076	0.00939594	Ash2l	NM_001106089
17876788	6.84383	7.05455	1.03079	0.0498379	Maged2	NM_001271109
17636894	7.85202	8.09386	1.0308	0.0380567	Ndufab1	NM_001106294
17687357	7.49648	7.72765	1.03084	0.0259898	Hlx	NM_001077674
17845202	8.67662	8.9442	1.03084	0.0458187	Pdcd7	NM_001108768
17669971	8.57118	8.83611	1.03091	0.0139538	Il13ra1	NM_145789
17602513	5.86003	6.04153	1.03097	0.0472174	---	---
17688417	7.20578	7.42941	1.03103	0.0476911	Coq2	NM_001044255
17870621	7.24282	7.46798	1.03109	0.0258343	Nkrf	XM_233308
17848927	8.75883	9.03246	1.03124	0.0365995	Eif1b	NM_001106867
17882665	8.20373	8.46042	1.03129	0.0178249	---	NM_001003710
17720758	8.24451	8.50345	1.03141	0.0490758	Nudt5	NM_001007733
17612327	8.94735	9.2286	1.03143	0.0426372	LOC102551889	XR_590005
17837820	7.75016	7.9941	1.03148	0.0323245	Zfat	NM_001134957
17693966	8.95192	9.23388	1.0315	0.0212675	Paics	NM_080910
17755031	9.7368	10.0441	1.03156	0.0353515	---	---
17743546	7.46601	7.70187	1.03159	0.0391835	Pigk	NM_001011953
17775817	9.08855	9.37586	1.03161	0.0097677	Oip5	XR_085783
17670512	8.53854	8.80924	1.0317	0.0238776	Eif2b5	NM_138866
17620218	8.31621	8.57993	1.03171	0.0215517	Eef2k	NM_012947
17677148	7.19561	7.42433	1.03179	0.0493795	Tyw1	NM_001107137
17797383	7.53703	7.77838	1.03202	0.0226338	Tmem64	XM_003749909
17712756	8.26894	8.5339	1.03204	0.0480623	LOC100359928	XR_596529
17676271	9.33737	9.63662	1.03205	0.0267414	Eif3b	NM_001031640
17704222	7.8434	8.09488	1.03206	0.0193966	Ccar2	NM_001170472
17881439	8.11236	8.37283	1.03211	0.0314971	---	NM_001128189
17667059	6.77039	6.98789	1.03213	0.00962265	Slc25a1	NM_017307
17629208	8.24265	8.508	1.03219	0.0384719	Prpf31	NM_001106219
17636721	7.24433	7.47776	1.03222	0.04389	Thumpd1	NM_001009688
17625886	8.08918	8.35026	1.03227	0.0442922	Hif1an	NM_001113749
17882627	9.18867	9.48563	1.03232	0.0389971	---	NM_001100158
17644038	7.45247	7.69458	1.03249	0.0492266	Mefv	NM_031634
17718688	8.42969	8.70388	1.03253	0.047642	Fam8a1	NM_001305175
17626858	8.2967	8.56672	1.03254	0.0434637	Fam45a	NM_001127681
17703140	10.2737	10.6089	1.03263	0.0390358	---	XM_003752804
17721066	7.34393	7.58427	1.03273	0.0404463	Hacd1	XM_006254292
17654132	7.71322	7.96574	1.03274	0.0422721	Thoc6	NM_024384
17773911	9.36491	9.67161	1.03275	0.038979	---	GENSCAN00000033609
17881875	8.25753	8.52835	1.0328	0.00823325	---	NM_001271249
17763319	8.49028	8.76935	1.03287	0.0398936	Nup35	NM_001004229
17766693	8.42692	8.70455	1.03295	0.0213877	---	NONRATT035857
17727918	8.05692	8.32254	1.03297	0.0059594	Ciapin1	NM_001007689
17661362	7.7314	7.98668	1.03302	0.0378536	Nt5c3b	NM_001007723
17765014	8.25477	8.5274	1.03303	0.0431232	Rad51	NM_001109204
17733876	7.95833	8.22127	1.03304	0.0187683	Plcg2	NM_017168
17639077	8.66647	8.95359	1.03313	0.013021	Ndufv1	NM_001006972
17792262	7.5518	7.80213	1.03315	0.0282275	Rnf181	NM_001007647
17700820	9.54188	9.85838	1.03317	0.00904031	---	---
17787104	9.0485	9.34995	1.03332	0.0163309	---	---
17636393	9.0086	9.30997	1.03345	0.0237795	---	---
17824737	10.7648	11.1261	1.03356	0.0268263	---	AJ286166
17674342	8.89497	9.19374	1.03359	0.0324686	Pebp1	NM_017236
17714559	8.05973	8.33126	1.03369	0.0343697	Nop16	NM_001047095
17844062	8.42736	8.71144	1.03371	0.0193025	Ppp2r1b	NM_001025418
17666305	7.84688	8.1117	1.03375	0.00677469	Senp5	XM_008768807
17667325	6.74478	6.97256	1.03377	0.0487739	Yars2	NM_001009627
17673512	8.34148	8.62328	1.03378	0.0187082	Ubc	NM_017314
17682563	7.57144	7.82729	1.03379	0.0424477	Itpkb	NM_019312
17787107	8.89667	9.19746	1.03381	0.0361628	---	---
17653796	7.95082	8.22048	1.03392	0.0132251	---	---
17606151	8.50004	8.78857	1.03394	0.0291045	---	---
17691057	8.35674	8.64115	1.03403	0.0373962	Pes1	NM_001044228
17630338	8.61943	8.91298	1.03406	0.0430527	Tomm40	NM_212520
17767722	7.91988	8.18963	1.03406	0.0101428	Bpifa6	XM_006224716
17732044	6.40913	6.62818	1.03418	0.0426917	Nod2	NM_001106172
17708216	7.63151	7.89353	1.03433	0.0101793	Lonrf1	XM_008771313
17674357	6.64263	6.87088	1.03436	0.040114	---	---
17676331	7.49709	7.75578	1.03451	0.0101389	Get4	NM_001163320
17645647	8.32374	8.61109	1.03452	0.0121721	Nhp2	NM_001105779
17734370	7.84195	8.11296	1.03456	0.0346875	Nup133	XM_001053507
17664738	7.14959	7.39683	1.03458	0.0269088	Smim11	NM_001131000
17709551	7.29142	7.54376	1.03461	0.0346215	Fam213a	NM_001008297
17727278	7.85686	8.12913	1.03465	0.0251772	Ctdp1	NM_001106131
17827059	8.59399	8.89238	1.03472	0.0306938	---	---
17648542	9.55697	9.88905	1.03475	0.0169395	---	---
17690967	8.73451	9.03831	1.03478	0.0396271	---	---
17646083	8.06991	8.35071	1.0348	0.0124387	Mrpl22	NM_001105781
17773125	8.29551	8.58528	1.03493	0.03426	---	---
17691049	7.44919	7.71064	1.0351	0.00220651	Dusp18	NM_001013128
17850971	7.97591	8.2559	1.0351	0.0354178	Chek1	NM_080400
17677415	6.51196	6.74073	1.03513	0.0367659	Fam101a	NM_001109547
17806704	9.52479	9.85991	1.03518	0.0372699	---	---
17682626	7.82758	8.1035	1.03525	0.0223112	Sde2	NM_001024970
17659339	6.73329	6.9713	1.03535	0.0470638	Pex12	NM_053921
17644941	8.48505	8.78517	1.03537	0.0232788	---	ENSRNOT00000039882
17778971	11.0159	11.4056	1.03538	0.0321658	---	ENSRNOT00000077983
17641492	7.70591	7.97875	1.03541	0.0345737	Ranbp6	NM_001107584
17793858	8.16926	8.459	1.03547	0.0434306	Emc3	NM_001008355
17706179	7.88473	8.16485	1.03553	0.0485422	Bap1	NM_001107292
17671818	8.80308	9.1166	1.03562	0.04619	---	---
17646391	6.4908	6.72296	1.03577	0.0132171	Rai1	NM_001271207
17686614	8.67871	8.98919	1.03578	0.0451708	Ppox	NM_001105968
17874036	8.45786	8.76116	1.03586	0.0353288	Bex4	ENSRNOT00000091999
17830106	8.6533	8.96394	1.0359	0.0140529	Cyc1	NM_001277194
17737735	8.53084	8.83712	1.0359	0.00960511	Actl6a	NM_001039033
17876288	7.87037	8.15295	1.0359	0.01158	Gpkow	NM_001109381
17832932	6.47601	6.70862	1.03592	0.0449125	Myl6b	ENSRNOT00000048453
17732904	8.3463	8.64615	1.03593	0.00176644	Otud4	NM_001191700
17793931	7.38433	7.65059	1.03606	0.0304546	Tamm41	NM_001108642
17717113	10.1213	10.4864	1.03607	0.0332223	Rpl34-ps1	ENSRNOT00000057895
17601957	4.99445	5.17467	1.03608	0.0371154	---	---
17760453	8.22956	8.52699	1.03614	0.0059876	Wdr5	NM_001039034
17742868	8.36238	8.66469	1.03615	0.0262145	---	---
17618918	7.59919	7.87441	1.03622	0.0364042	Anapc15	NM_001170435
17667579	8.40327	8.70808	1.03627	0.0149913	Atp5j	M73030
17644586	9.30077	9.63816	1.03628	0.045328	RGD1559662	XM_008767614
17868345	7.96522	8.25452	1.03632	0.0185298	Micu1	NM_199412
17774854	9.43608	9.77962	1.03641	0.00254727	---	---
17709065	8.4917	8.80192	1.03653	0.0279653	LOC100364062	XM_002727444
17724291	8.40876	8.71673	1.03662	0.0391671	RGD1562987	NM_001173472
17648524	9.87926	10.2414	1.03665	0.0105145	---	---
17766336	6.89697	7.14976	1.03665	0.0136113	---	---
17690617	7.41325	7.6862	1.03682	0.0195173	Tada2b	NM_001170455
17667850	6.74126	6.9897	1.03685	0.0103178	RGD1306954	NM_001008288
17776263	6.46643	6.70525	1.03693	0.01844	Tp53bp1	XM_006234865
17880577	9.0126	9.34555	1.03694	0.0148091	LOC691736	XR_085737
17641362	7.0218	7.28183	1.03703	0.0449808	Pum3	NM_001025036
17679597	8.60649	8.9276	1.03731	0.0235245	Nifk	NM_139186
17704290	7.52351	7.80508	1.03743	0.00742305	Ppp3cc	XM_008770815
17671811	9.08431	9.42485	1.03749	0.0451208	---	---
17682414	5.53093	5.73844	1.03752	0.0365993	Rpl30l1	XM_001059720
17647139	7.01733	7.2809	1.03756	0.013541	Gas7	NM_053484
17882109	8.37206	8.68742	1.03767	0.0160854	---	NM_001127570
17721912	9.45249	9.80879	1.03769	0.00837601	---	---
17735439	7.78035	8.07381	1.03772	0.0425772	Mrps27	NM_001108543
17781780	7.76933	8.06241	1.03772	0.00949217	Ing3	NM_001034107
17787105	10.1311	10.5136	1.03776	0.00202416	---	---
17658251	6.78611	7.04275	1.03782	0.0279887	Dhx33	NM_001105802
17863778	7.55086	7.83652	1.03783	0.0223525	Kansl3	NM_001034835
17881881	7.27296	7.54813	1.03783	0.0350383	---	XM_008757949
17748289	7.13307	7.40314	1.03786	0.0497688	Tlr2	NM_198769
17797843	7.11476	7.38416	1.03786	0.0188079	Lyrm2	NM_001126096
17834704	7.20991	7.48482	1.03813	0.0334188	RGD1563365	NM_001271340
17806744	8.52396	8.84904	1.03814	0.0190987	Stoml2	NM_001031646
17769382	7.85864	8.15987	1.03833	0.030945	Stx16	NM_001108610
17850302	8.04757	8.35672	1.03842	0.0119206	Keap1	NM_057152
17613658	8.90971	9.25241	1.03846	0.0468574	Gng5	ENSRNOT00000058172
17636389	8.25842	8.5762	1.03848	0.0446104	---	---
17677410	7.99716	8.3049	1.03848	0.0429689	Bri3bp	NM_001017487
17800800	7.72144	8.0189	1.03852	0.0328339	Kti12	NM_001044288
17675053	7.07858	7.35134	1.03853	0.0495251	Map2k7	NM_001025425
17850293	7.93483	8.24189	1.0387	0.027733	---	---
17718317	7.47825	7.76801	1.03875	0.0266174	Higd2a	NM_001106102
17627881	8.17873	8.49605	1.0388	0.021491	Echdc1	NM_001007734
17881991	6.70713	6.96757	1.03883	0.0271167	---	NM_024488
17751413	6.8844	7.15246	1.03894	0.0479806	Ostc	NM_001108566
17826257	8.62697	8.96352	1.03901	0.00326648	---	---
17872821	6.88191	7.15044	1.03902	0.0428349	Klhl15	NM_001108021
17721905	8.76078	9.10274	1.03903	0.00298748	---	---
17760692	7.74263	8.0449	1.03904	0.0481004	Med27	NM_001106565
17624207	7.59799	7.89486	1.03907	0.00670195	Mrpl16	NM_001009647
17734035	7.40586	7.69625	1.03921	0.0319351	Emc8	NM_001012165
17653352	7.45948	7.75292	1.03934	0.0486549	Anapc11	NM_001126082
17663202	8.59827	8.93763	1.03947	0.0365416	Nt5c	NM_001271189
17807972	6.86816	7.1404	1.03964	0.00561673	Pole3	NM_001007652
17867251	9.3708	9.7428	1.0397	0.0485128	Rpl5l1	ENSRNOT00000056238
17796683	6.89902	7.17391	1.03984	0.0271526	Tmem70	NM_001109258
17744460	6.83758	7.11005	1.03985	0.0364624	Ankdd1b	XM_008760686
17732723	8.47426	8.81203	1.03986	0.0367183	---	---
17676790	7.13123	7.41573	1.03989	0.0112129	Mepce	NM_001100678
17679273	5.63993	5.86518	1.03994	0.00683777	---	---
17716043	7.25936	7.55035	1.04008	0.0387133	Mrpl32	NM_001106116
17782524	6.56087	6.82439	1.04017	0.046324	Ttc26	NM_001025045
17881957	6.97753	7.25819	1.04022	0.0292727	---	NM_001048180
17640498	7.03797	7.32107	1.04023	0.019104	Tmem216	NM_001271039
17631921	6.96599	7.24627	1.04024	0.0390655	Pdcd2l	NM_001109544
17763373	5.45736	5.67761	1.04036	0.00665858	---	ENSRNOT00000081350
17659201	7.01323	7.29634	1.04037	0.00716005	Timm22	NM_032618
17734997	7.16824	7.45836	1.04047	0.0191098	Faim	NM_080895
17846848	7.16824	7.45836	1.04047	0.0191098	Faim	NM_080895
17600551	6.73012	7.00287	1.04053	0.0489694	---	---
17610065	6.73012	7.00287	1.04053	0.0489694	---	---
17648528	10.5801	11.0101	1.04064	0.00407138	---	---
17722461	7.3652	7.66515	1.04072	0.015117	Slc4a9	NM_152938
17732113	7.37123	7.67143	1.04073	0.0336631	Heatr3	XM_001067127
17659971	7.98719	8.31266	1.04075	0.0474577	Pctp	NM_017225
17615824	7.00589	7.29139	1.04075	0.0362876	LOC102556967	XM_006223240
17774857	9.08154	9.45326	1.04093	0.0276806	---	---
17751762	7.51175	7.81927	1.04094	0.0193053	Hs2st1	NM_001100518
17838409	7.87995	8.20273	1.04096	0.0257714	---	---
17881082	7.8785	8.20172	1.04103	0.0304502	Fpr2l	XM_001058050
17787091	9.92184	10.3293	1.04107	0.00781741	---	---
17753249	7.65238	7.96723	1.04114	0.0114156	Pfdn6	NM_001164718
17602761	7.34471	7.64816	1.04132	0.0493461	---	---
17826256	8.51848	8.87052	1.04133	0.046496	---	---
17652361	6.58491	6.8591	1.04164	0.0338907	Kcnj2	NM_017296
17839569	8.86359	9.23319	1.0417	0.0266826	---	GENSCAN00000032248
17664150	8.12115	8.46087	1.04183	0.0277242	LOC619574	NM_001034959
17843642	6.41855	6.68707	1.04184	0.047733	Bcl9l	NM_001106817
17623894	6.96409	7.25588	1.0419	0.0450782	Tut1	NM_001033901
17600825	6.8772	7.16762	1.04223	0.0439552	---	---
17774856	9.20738	9.59649	1.04226	0.019252	---	---
17686713	8.14139	8.48548	1.04227	0.0443523	---	---
17787137	8.99792	9.37838	1.04228	0.000788854	---	---
17858689	8.19195	8.53836	1.04229	0.0446709	Il1r2	NM_053953
17811548	8.01984	8.3591	1.0423	0.00679629	---	---
17646608	6.8054	7.0937	1.04236	0.0379018	B9d1	NM_001105786
17742458	5.71866	5.9616	1.04248	0.036838	Fabp2	NM_013068
17618362	6.72865	7.015	1.04256	0.0369136	Nars2	NM_001034921
17838648	6.44181	6.71596	1.04256	0.0259738	Fbxl6	NM_001005563
17787101	9.12058	9.509	1.04259	0.00920316	Phb2	NM_001013035
17602435	7.32262	7.63492	1.04265	0.0201908	---	---
17818921	6.85331	7.14595	1.0427	0.0197229	Exoc3l4	NM_001106759
17665328	7.76159	8.0936	1.04278	0.0458031	LOC100360499	ENSRNOT00000060645
17623408	6.8011	7.09238	1.04283	0.0361922	Men1	NM_019208
17622622	6.97177	7.27082	1.04289	0.0267575	LOC100364769	NM_001177828
17623767	6.81686	7.10946	1.04292	0.0246938	Bscl2	NM_001012171
17606213	5.82557	6.07628	1.04304	0.00216978	---	---
17722057	7.60807	7.93693	1.04323	0.0416462	Ammecr1l	NM_001107399
17693056	6.25252	6.5232	1.04329	0.0400698	---	GENSCAN00000025669
17600385	7.07592	7.38238	1.04331	0.0335606	---	---
17836571	8.68724	9.06451	1.04343	0.0466268	Shmt2	NM_001008322
17758324	5.56224	5.80407	1.04348	0.0230619	---	ENSRNOT00000000700
17614210	5.44299	5.68012	1.04357	0.0323606	Irgq	NM_001135742
17755902	5.42342	5.6601	1.04364	0.0160423	---	NM_001000267
17845225	6.32386	6.59983	1.04364	0.0441933	Mtfmt	NM_001009697
17874884	7.72245	8.06036	1.04376	0.0065427	Tmem185a	NM_001135712
17745766	7.77343	8.11387	1.0438	0.0219612	Skp2	NM_001106416
17648038	8.13619	8.49284	1.04384	0.0324945	Mybbp1a	NM_031668
17786877	8.14963	8.50719	1.04388	0.0211859	M6pr	NM_001007700
17826210	6.90049	7.2041	1.044	0.0391633	Timm13	NM_145781
17832883	6.1332	6.40337	1.04405	0.0471849	Coq10a	NM_001108727
17849158	7.40762	7.73454	1.04413	0.00732976	Exosc7	NM_001100725
17881325	6.01043	6.27644	1.04426	0.0398602	---	RPTR-X17220-1
17881769	5.45819	5.70002	1.04431	0.0483856	---	GENSCAN00000049744
17775148	8.14014	8.50084	1.04431	0.00361253	RGD1560017	ENSRNOT00000049695
17649349	6.2024	6.47801	1.04444	0.0221549	Rhbdl3	NM_001105819
17740203	7.14938	7.46724	1.04446	0.0208868	LOC361985	NM_001014174
17694813	6.16887	6.4433	1.04449	0.0220044	Pacrgl	XM_001057772
17816766	7.54568	7.88196	1.04457	0.0338815	Mthfd1	NM_022508
17760727	6.39216	6.67771	1.04467	0.0339233	Slc27a4	NM_001100706
17699080	9.3198	9.73686	1.04475	0.00421789	---	ENSRNOT00000091167
17700158	8.28273	8.65353	1.04477	0.0132277	---	---
17810521	8.77979	9.17318	1.04481	0.0181692	---	---
17836042	7.86446	8.21699	1.04483	0.0226812	Nup107	NM_053830
17647205	6.45988	6.75003	1.04492	0.0270661	Pik3r6	NM_001081444
17716626	7.31823	7.64817	1.04508	0.0102078	LOC102551641	XR_362389
17604539	5.72693	5.98593	1.04522	0.0127181	---	---
17672229	7.22063	7.54766	1.04529	0.0372622	Zfand2a	NM_001008363
17648712	6.37266	6.66246	1.04547	0.0136397	Rnmtl1	NM_001108282
17659769	6.00874	6.28226	1.04552	0.026212	Smg8	XM_001081151
17688883	7.99214	8.3564	1.04558	0.0164492	---	---
17672248	6.20513	6.48866	1.04569	0.0013742	Cox19	NM_001107126
17628084	8.53493	8.92534	1.04574	0.034928	LOC679731	XR_597617
17838161	4.91288	5.13807	1.04584	0.0444575	D730001G18Rik	ENSRNOT00000076047
17677577	6.79926	7.11115	1.04587	0.0372971	Ddx55	NM_001271326
17878572	7.08705	7.41259	1.04593	0.0429749	---	GENSCAN00000031969
17623009	6.73901	7.0486	1.04594	0.0306448	---	---
17707228	7.24162	7.57484	1.04601	0.0188505	Rfxank	NM_001013136
17791413	6.60613	6.9105	1.04607	0.0377816	---	ENSRNOT00000035078
17860486	7.25107	7.58526	1.04609	0.0253255	Ttll4	XM_001074653
17640331	7.34375	7.68243	1.04612	0.0493023	Asrgl1	NM_145089
17709868	6.84083	7.15638	1.04613	0.0118309	Smim4	XM_001062546
17807008	8.13334	8.50924	1.04622	0.0332946	Tomm5	XM_001055588
17812757	5.04473	5.27845	1.04633	0.0405451	Cort	NM_012835
17788708	6.25532	6.54513	1.04633	0.0369734	---	ENSRNOT00000063234
17691265	6.45508	6.75583	1.04659	0.0287657	Rasl10a	NM_001108862
17695725	7.34538	7.68868	1.04674	0.0208505	Rnf185	NM_001024271
17646781	6.80669	7.12513	1.04678	0.0439897	Elac2	NM_172326
17881062	6.90342	7.22675	1.04684	0.00148578	---	GENSCAN00000030019
17660199	5.4996	5.75757	1.04691	0.0425664	Mycbpap	NM_001009482
17841727	3.95169	4.13723	1.04695	0.0414763	---	GENSCAN00000011455
17809712	5.85966	6.13497	1.04698	0.0247847	Dmap1	NM_001015006
17882001	6.15708	6.4476	1.04719	0.0415057	---	NM_031690
17636654	7.10558	7.44115	1.04723	0.0209156	Knop1	NM_001134611
17756992	6.73529	7.05447	1.04739	0.0427979	Daxx	NM_080891
17839835	7.34619	7.69498	1.04748	0.0194018	Alg12	NM_001108104
17625627	6.69527	7.01321	1.04749	0.0254936	Slc25a28	NM_001109515
17654541	6.79898	7.12277	1.04762	0.0367035	Tbl3	NM_001008277
17609503	6.46108	6.76889	1.04764	0.0457357	---	---
17663218	9.18322	9.62084	1.04766	0.0208674	---	---
17741221	7.81814	8.19096	1.04769	0.0317981	---	ENSRNOT00000054534
17808227	6.88629	7.21476	1.0477	0.00666154	---	---
17665315	7.19056	7.53362	1.04771	0.0374962	Trmt10c	NM_001008337
17880463	6.24923	6.54752	1.04773	0.0211194	---	---
17838411	8.76114	9.17942	1.04774	0.0344173	---	---
17771789	6.34528	6.64827	1.04775	0.0132917	Zbtb26	NM_001107840
17671814	9.06737	9.50049	1.04777	0.0324777	---	---
17642265	6.93564	7.26747	1.04785	0.032562	Zfyve27	NM_199104
17697044	6.79693	7.12222	1.04786	0.00989426	Ndst2	NM_001105740
17658961	7.58053	7.94502	1.04808	0.0297194	Tmem97	NM_001008334
17710118	6.43925	6.75001	1.04826	0.0432108	Hacl1	NM_053493
17880635	8.58359	9.00159	1.0487	0.0134326	---	---
17830940	7.17583	7.52533	1.0487	0.0245323	L3mbtl2	NM_001033695
17828798	7.45202	7.81753	1.04905	0.0309623	---	---
17789452	5.99308	6.28778	1.04917	0.00649568	---	GENSCAN00000002304
17602165	5.47394	5.74475	1.04947	0.0318016	---	---
17626851	6.83084	7.17037	1.04971	0.036414	LOC100359574	XM_008760591
17710996	6.32276	6.63745	1.04977	0.0192116	Tmem161a	NM_001108874
17685969	7.40451	7.77678	1.05028	0.0166976	Mettl13	NM_001134501
17882155	5.57769	5.85969	1.05056	0.0497316	---	NM_134405
17787103	8.01911	8.42458	1.05056	0.0271135	---	---
17701925	6.64983	6.98658	1.05064	0.00389093	Ccnb1ip1	NM_001025141
17806712	8.18106	8.59691	1.05083	0.0499672	---	---
17656378	5.29965	5.56999	1.05101	0.0257608	Hand1	NM_021592
17639720	7.42074	7.79954	1.05105	0.0454444	Sssca1	NM_001109537
17876731	5.83825	6.13675	1.05113	0.0056996	RragB	NM_053972
17821040	5.18549	5.45096	1.0512	0.0301026	Slc7a15	NM_001106714
17622904	6.23056	6.54968	1.05122	0.0200065	Pold4	NM_001013195
17658826	6.34484	6.67009	1.05126	0.00650372	Sgk494	XM_006220734
17749548	7.77903	8.17857	1.05136	0.0056428	Mrps21	NM_001126094
17699328	5.65273	5.94376	1.05149	0.0203335	---	GENSCAN00000020679
17620596	6.33643	6.66413	1.05172	0.0468403	Sbk1	NM_147135
17741796	6.45074	6.78601	1.05197	0.0109097	Kcna10	NM_001191713
17829203	8.4085	8.84843	1.05232	0.00320596	---	ENSRNOT00000089710
17644564	6.176	6.49915	1.05232	0.0308402	Prss34	NM_001105772
17824075	5.50143	5.7902	1.05249	0.0415623	Serpina11	NM_001008776
17668030	6.718	7.07075	1.05251	0.0444297	Setd4	NM_001113747
17799004	7.11543	7.48948	1.05257	0.0486102	---	---
17811615	4.98213	5.24459	1.05268	0.00525975	Ephb2	NM_001127319
17641187	5.8868	6.19765	1.0528	0.0355527	---	ENSRNOT00000029774
17764369	5.62046	5.91729	1.05281	0.0250549	RGD1563222	NM_001108585
17865436	7.30701	7.69424	1.05299	0.00555372	Aamp	NM_001106920
17712693	7.71464	8.12354	1.053	0.0229085	Np4	ENSRNOT00000029297
17673150	5.54108	5.83569	1.05317	0.0126378	Gtf2ird1	NM_001001504
17755581	6.29132	6.62686	1.05333	0.0422814	Mettl24	NM_001025038
17671901	5.16462	5.4401	1.05334	0.0483056	---	NM_001034153
17797978	9.58136	10.0947	1.05357	0.0192843	---	---
17611551	7.91253	8.33715	1.05366	0.0317602	---	ENSRNOT00000082714
17849723	7.91253	8.33715	1.05366	0.0317602	---	ENSRNOT00000082714
17879737	7.27779	7.66938	1.05381	0.0196405	---	ENSRNOT00000007487
17607205	6.28899	6.62751	1.05383	0.0229121	---	---
17880263	6.78434	7.14969	1.05385	0.00307439	Dnajc30	NM_001109024
17880269	6.78434	7.14969	1.05385	0.00307439	Dnajc30	NM_001109024
17839535	7.24481	7.63596	1.05399	0.0162661	Rrp7a	NM_001130568
17814680	7.27738	7.67055	1.05403	0.0445616	Sdc1	NM_013026
17817298	6.48494	6.83638	1.05419	0.0380341	RGD1307704	NM_001108040
17769515	6.4072	6.75539	1.05434	0.027513	Mtg2	NM_001013924
17610541	6.90305	7.27826	1.05435	0.0294477	Fuca2	NM_001004218
17883045	4.61249	4.86345	1.05441	0.00967361	---	XM_006227087
17686716	8.27108	8.72164	1.05447	0.024404	---	---
17822836	7.23356	7.62792	1.05452	0.00313195	Vti1b	XM_003750196
17661790	6.85245	7.22689	1.05464	0.0279776	Tmem101	NM_001191650
17671816	7.31106	7.71129	1.05474	0.0300933	---	---
17674306	5.85882	6.17965	1.05476	0.0197191	Fbxw8	NM_001107145
17636382	7.38302	7.78834	1.0549	0.0116215	---	---
17625285	7.32873	7.73236	1.05507	0.0161526	---	ENSRNOT00000031545
17826514	7.58688	8.00768	1.05546	0.0256468	---	---
17872770	8.66043	9.14102	1.05549	0.0263368	LOC680959	XR_597612
17604907	6.29229	6.64222	1.05561	0.0218556	---	---
17615098	5.04375	5.32444	1.05565	0.0433622	Ggn	NM_001013065
17718585	6.99212	7.3818	1.05573	0.0295847	---	ENSRNOT00000087206
17734018	5.62833	5.94322	1.05595	0.0427803	Gins2	NM_001106190
17838720	7.46062	7.87901	1.05608	0.0395627	---	---
17796850	6.69398	7.07081	1.05629	0.00683522	---	ENSRNOT00000078457
17787112	5.66728	5.98635	1.0563	0.0458705	---	---
17713887	7.1744	7.57845	1.05632	0.00314318	Zfp845	XM_008773616
17795328	4.9577	5.23735	1.05641	0.0264755	LOC689757	NM_001101019
17610966	7.51848	7.9434	1.05652	0.0150891	---	ENSRNOT00000081762
17871740	7.12194	7.52634	1.05678	0.0274033	LOC100362724	XM_003752027
17698102	7.12876	7.53561	1.05707	0.0471026	Apex1	NM_024148
17792565	6.63679	7.0163	1.05718	0.0162666	---	---
17774321	5.00827	5.29587	1.05742	0.0303611	Olr687	NM_001000356
17734042	6.21999	6.57799	1.05756	0.0316714	Fbxo31	NM_001044259
17637482	6.27404	6.63518	1.05756	0.039277	Bcl7c	NM_001106298
17610361	4.3497	4.6011	1.0578	0.0472924	---	---
17826516	5.87571	6.21581	1.05788	0.0393943	---	---
17663660	6.34716	6.71514	1.05798	0.0444968	Jmjd6	NM_001012143
17826196	5.90393	6.24689	1.05809	0.0361755	Lmnb2	NM_001305235
17802578	6.72133	7.11319	1.0583	0.0252179	Pef1	NM_001007651
17603927	4.96019	5.24988	1.0584	0.0498771	---	---
17875778	9.06488	9.59486	1.05846	0.0149109	---	---
17674775	6.58382	6.96929	1.05855	0.0390761	Pus1	NM_001025563
17700724	6.39675	6.77276	1.05878	0.0245658	Rap2a	NM_053741
17617281	5.59921	5.92968	1.05902	0.0283662	Mcee	NM_001106341
17836725	5.09531	5.39707	1.05922	0.0315317	Tspyl5	XM_006226056
17843465	8.2174	8.70758	1.05965	0.0358382	---	ENSRNOT00000080953
17832602	6.49002	6.87878	1.0599	0.0373135	Mfsd5	NM_001126282
17614071	6.11542	6.48335	1.06016	0.045291	Trappc6a	NM_001109410
17638713	6.20393	6.57915	1.06048	0.0312146	---	ENSRNOT00000090108
17699053	5.52677	5.86114	1.0605	0.0222869	---	XM_008768879
17801684	6.04785	6.41499	1.06071	0.00471233	---	NONRATT043531
17739166	7.50675	7.96252	1.06071	0.00487798	RGD1563620	XM_001062166
17880794	5.3681	5.69417	1.06074	0.00277611	---	GENSCAN00000021707
17730701	4.36186	4.6279	1.06099	0.0446671	Mir3564	NR_037347
17883057	4.27085	4.53142	1.06101	0.0112152	---	XM_006227142
17883065	4.27085	4.53142	1.06101	0.0112152	---	XM_006227142
17813633	6.37848	6.76834	1.06112	0.0114661	LOC102551744	ENSRNOT00000045349
17783874	7.60625	8.07165	1.06119	0.00522367	---	ENSRNOT00000090943
17861749	5.51281	5.85074	1.0613	0.0433321	Sned1	NM_001167842
17699234	5.48073	5.8171	1.06137	0.0493122	---	---
17670151	7.40262	7.85707	1.06139	0.0436432	Fetub	NM_001309522
17780215	5.87023	6.23094	1.06145	0.0435063	Zfp512b	NM_001107809
17602255	6.18135	6.56165	1.06152	0.0470984	---	---
17648562	7.4035	7.86085	1.06177	0.0390824	---	---
17649604	5.28116	5.60871	1.06202	0.0463511	Ccl4	NM_053858
17778591	5.83094	6.19324	1.06213	0.0429539	Gss	NM_012962
17841427	5.71479	6.07043	1.06223	0.0308668	Krt4	NM_001008806
17776252	6.08593	6.46546	1.06236	0.046102	Lcmt2	NM_001011956
17749154	5.18587	5.50995	1.06249	0.0286244	Lor	XM_008761253
17878327	6.63053	7.04506	1.06252	0.00613778	---	GENSCAN00000013427
17711252	7.60251	8.07848	1.06261	0.0414165	---	GENSCAN00000031685
17603991	5.54645	5.89433	1.06272	0.00894587	---	---
17803520	6.22225	6.61287	1.06278	0.0192726	Tmco4	NM_001034949
17856320	5.97072	6.34647	1.06293	0.043495	Cmc1	NM_001135259
17787110	7.55726	8.03513	1.06323	0.0378899	---	---
17754123	6.83813	7.2711	1.06332	0.00160133	Pwp2	NM_001168653
17715792	6.38118	6.78556	1.06337	0.0403466	Zfp322a	NM_001135084
17880673	7.34063	7.8067	1.06349	0.00037182	---	GENSCAN00000023061
17881555	6.34132	6.74472	1.06361	0.00348292	---	XM_002725441
17850594	4.65466	4.95267	1.06402	0.0279566	Dpy19l2	XM_002727030
17634225	6.77271	7.20776	1.06423	0.0384942	Ap3s2	NM_001115039
17603481	6.29086	6.69882	1.06485	0.0317745	---	---
17837695	6.18217	6.58312	1.06486	0.0121779	---	GENSCAN00000055264
17869255	6.41499	6.8333	1.06521	0.0120825	Kdm4b	NM_001044236
17652606	5.40017	5.75262	1.06527	0.0160164	Kctd2	XM_006221035
17611052	4.52767	4.82336	1.06531	0.0255825	Taar8c	NM_175600
17655940	4.62599	4.92834	1.06536	0.0263613	LOC497899	NM_001017472
17806434	6.98347	7.43995	1.06537	0.00731282	Ndufb6	NM_001106646
17637433	5.26967	5.61678	1.06587	0.00852675	Znf768	XM_006223512
17770011	5.66816	6.04201	1.06596	0.0411572	---	ENSRNOT00000054562
17683537	4.46651	4.76236	1.06624	0.0146548	---	ENSRNOT00000082541
17880483	4.9609	5.28989	1.06632	0.0200887	---	GENSCAN00000046877
17716034	6.38699	6.81069	1.06634	0.0241747	Hax1	NM_181627
17632675	5.45693	5.81905	1.06636	0.0102388	Prrg2	NM_001108482
17734805	8.61048	9.18228	1.06641	0.0377879	---	---
17600643	5.66533	6.04611	1.06721	0.0195944	---	---
17610157	5.66533	6.04611	1.06721	0.0195944	---	---
17604759	6.57525	7.02103	1.0678	0.0243217	---	---
17670701	5.85647	6.25467	1.06799	0.0280213	Klhl22	NM_001107079
17787114	5.74332	6.13469	1.06814	0.00977435	---	---
17733845	6.92525	7.39795	1.06826	0.0077741	Gcsh	NM_133598
17769288	5.05663	5.40422	1.06874	0.0233428	Tfap2c	NM_201420
17625058	7.45386	7.97245	1.06957	0.0399739	---	ENSRNOT00000073369
17695170	5.48055	5.86233	1.06966	0.0458421	Psapl1	NM_001144850
17655641	6.13628	6.5648	1.06983	0.00896781	Lsm11	NM_001173384
17773126	5.70097	6.09945	1.0699	0.0114499	---	---
17656681	7.01297	7.50342	1.06993	0.0322076	---	---
17848144	4.57904	4.89999	1.07009	0.0292662	Cspg5	NM_019284
17879599	5.03768	5.39092	1.07012	0.0480362	---	GENSCAN00000026244
17818103	5.30411	5.67631	1.07017	0.0094879	Ppp4r4	NM_001134632
17668572	5.63232	6.02997	1.0706	0.00488922	---	ENSRNOT00000084952
17624595	5.94022	6.3612	1.07087	0.02144	---	ENSRNOT00000049732
17620954	5.90443	6.32302	1.07089	0.048333	Fbxl19	NM_001107552
17847325	5.3694	5.75198	1.07125	0.0389165	Rrp9	NM_001108778
17881847	4.79761	5.14264	1.07192	0.0311835	---	XM_001063879
17873991	3.81931	4.09413	1.07196	0.0495296	Nxf5	XM_008758524
17625999	5.02278	5.38662	1.07244	0.0333172	Tlx1	NM_001109166
17871554	6.6276	7.11318	1.07327	0.0070364	---	ENSRNOT00000060001
17840382	7.02012	7.53497	1.07334	0.0423238	---	GENSCAN00000010293
17716083	6.37146	6.83973	1.07349	0.00341945	---	NONRATT024279
17609751	5.32124	5.71247	1.07352	0.00323075	---	---
17632721	8.99265	9.65429	1.07357	0.0488934	---	ENSRNOT00000086598
17830074	5.15709	5.53655	1.07358	0.039146	Smpd5	NM_001304747
17825855	4.81402	5.16877	1.07369	0.0471978	---	---
17608687	5.56459	5.97486	1.07373	0.0415955	---	---
17843260	4.81495	5.17208	1.07417	0.00443196	LOC685016	XM_006226992
17844984	7.26954	7.8105	1.07441	0.0199238	---	ENSRNOT00000087484
17869137	4.99943	5.37282	1.07469	0.0320731	Alkbh7	NM_001109384
17879988	4.95359	5.32388	1.07475	0.022801	Plxna3	NM_001107581
17721916	7.49049	8.05343	1.07515	0.0259765	---	---
17635928	4.1594	4.47206	1.07517	0.0347431	Olr223	NM_001000202
17843424	5.47267	5.88425	1.07521	0.00678769	Zfp202	NM_001109290
17818430	5.80515	6.24255	1.07535	0.0333697	Mir341	NR_031785
17646717	8.26733	8.89402	1.0758	0.0325775	---	ENSRNOT00000085658
17842354	5.57636	6.00422	1.07673	0.036251	---	ENSRNOT00000077761
17607535	5.43305	5.85015	1.07677	0.0208533	---	---
17608953	5.43305	5.85015	1.07677	0.0208533	---	---
17883704	3.85635	4.15334	1.07701	0.0333847	---	---
17649544	5.57394	6.00332	1.07703	0.0364451	Slfn3	XM_008768151
17686816	5.20672	5.61149	1.07774	0.0308721	Dusp23	NM_001191830
17609597	5.44101	5.86402	1.07774	0.0126834	---	---
17609781	4.89803	5.27904	1.07779	0.0084918	---	---
17822830	5.82831	6.28204	1.07785	0.0254673	Pigh	NM_001108714
17843379	4.6277	4.98823	1.07791	0.00850894	Olr1308	NM_001000795
17604611	5.7632	6.21293	1.07804	0.0172061	---	---
17626033	4.80009	5.17526	1.07816	0.0205108	Hps6	NM_181432
17744392	5.14264	5.54495	1.07823	0.0125522	S100z	NM_001191701
17681287	6.16422	6.64748	1.0784	0.00867381	Rc3h1	XM_002724882
17802442	6.87134	7.41016	1.07842	0.00610985	---	ENSRNOT00000043325
17851451	4.49762	4.85077	1.07852	0.0479651	Mir3596a	NR_037385
17854847	4.361	4.70381	1.07861	0.0350229	Clstn2	NM_134377
17835867	4.63382	4.99821	1.07864	0.0457802	Kcnmb4	NM_023960
17625288	4.83228	5.21342	1.07887	0.0166789	---	ENSRNOT00000018878
17605499	4.66555	5.03463	1.07911	0.0281027	---	---
17717411	5.62557	6.07215	1.07938	0.0423649	Msrb2	NM_001031660
17816552	5.67212	6.12247	1.0794	0.0470115	LOC100361944	XM_006225795
17834011	5.77685	6.23562	1.07942	0.0142499	Fstl3	NM_053629
17704544	5.10976	5.51664	1.07963	0.0200382	Nudt15	NM_001106049
17881945	5.95292	6.42955	1.08007	0.0184933	---	NM_021849
17681321	7.57282	8.18203	1.08045	0.0327378	---	ENSRNOT00000082103
17630278	5.71867	6.18124	1.08089	0.0043679	Klc3	NM_138520
17873940	6.84842	7.40255	1.08091	0.012401	---	GENSCAN00000051480
17629172	4.93008	5.3297	1.08106	0.0390481	Rps9	NM_031108
17672508	5.09368	5.50863	1.08146	0.00306105	LOC100909556	ENSRNOT00000072097
17724160	4.54072	4.91173	1.08171	0.0228902	---	GENSCAN00000034789
17745564	8.42282	9.11263	1.0819	0.0437444	---	---
17677356	4.99914	5.40918	1.08202	0.0322077	Glt1d1	XM_001073476
17693741	4.93422	5.33936	1.08211	0.00160341	Dzip1-ps1	NR_003527
17866946	4.88318	5.28498	1.08228	0.0427744	---	---
17748624	6.83059	7.39392	1.08247	0.0133757	---	---
17642793	3.99433	4.32402	1.08254	0.0479172	---	ENSRNOT00000079294
17642795	3.99433	4.32402	1.08254	0.0479172	---	ENSRNOT00000079294
17833117	4.16525	4.50948	1.08264	0.0290064	Rdh5	XM_002726857
17617129	5.96412	6.45775	1.08277	0.0120336	---	GENSCAN00000059392
17810985	6.14457	6.65414	1.08293	0.0457831	Nkain1	XM_008764183
17616728	5.8438	6.32894	1.08302	0.0315672	Nav2	NM_138529
17662513	7.83325	8.48368	1.08303	0.0337487	---	ENSRNOT00000079258
17600263	5.89246	6.38269	1.0832	0.026806	---	---
17772365	6.19931	6.71856	1.08376	0.0292321	---	GENSCAN00000012179
17877145	4.65158	5.04132	1.08379	0.0101932	Rai2	NM_001109316
17872525	3.21737	3.48726	1.08389	0.0188247	---	GENSCAN00000032666
17668348	5.61211	6.08332	1.08396	0.00708726	---	---
17844521	5.96304	6.46424	1.08405	0.0112681	Fam219b	NM_001108764
17795787	4.39852	4.76978	1.0844	0.022368	Tas2r129	NM_001166683
17742274	4.98443	5.40562	1.0845	0.0337051	---	ENSRNOT00000036228
17840724	6.3408	6.87749	1.08464	0.00292819	---	ENSRNOT00000079851
17645356	4.33667	4.70415	1.08474	0.0295497	Olr1397	NM_001001094
17815821	5.76817	6.25776	1.08488	0.00758742	Nubpl	NM_001185025
17638231	5.22531	5.66898	1.08491	0.0381046	Sigirr	NM_001024887
17802419	5.13478	5.57133	1.08502	0.0152814	Sync	NM_001108683
17707465	4.7398	5.14281	1.08503	0.0455018	---	GENSCAN00000054291
17617825	4.56385	4.95368	1.08542	0.0345948	---	---
17766772	4.70435	5.10732	1.08566	0.00586532	Otor	NM_001108960
17608697	5.76087	6.25534	1.08583	0.00280239	---	---
17880351	6.82992	7.4166	1.0859	0.0104449	LOC103693442	XM_008768233
17849136	5.76381	6.26199	1.08643	0.00427474	Tmem42	NM_001191886
17803181	5.87634	6.38565	1.08667	0.0299682	Wnt4	ENSRNOT00000081893
17788868	4.86117	5.28265	1.0867	0.0208806	Magi2	NM_053621
17712710	5.26722	5.72613	1.08713	0.000120862	Defa10	NM_001033074
17600029	5.6885	6.18462	1.08721	0.0300406	---	---
17602357	4.79235	5.21036	1.08722	0.0427127	---	---
17797130	5.85158	6.3628	1.08736	0.0423019	Fam110b	NM_001024341
17784327	8.83686	9.61303	1.08783	0.00899845	---	ENSRNOT00000048493
17699262	5.56964	6.05971	1.08799	0.00976738	---	---
17760451	7.16662	7.79816	1.08812	0.0458228	---	ENSRNOT00000077431
17681062	4.9476	5.38505	1.08842	0.00523589	RGD1561635	XM_006221502
17881529	5.55283	6.04615	1.08884	0.0430231	---	---
17662644	4.62215	5.03345	1.08898	0.00614418	Cacng1	NM_019255
17746334	5.849	6.37298	1.08958	0.0168991	Chmp4c	NM_001017466
17727441	4.16878	4.5424	1.08962	0.0326747	LOC100359752	XM_008772227
17883744	3.62452	3.95119	1.09013	0.0219071	---	---
17833676	5.71494	6.23072	1.09025	0.018735	Scamp4	NM_031725
17653713	4.02461	4.39098	1.09103	0.00631942	Atf7ip2	NM_001017471
17680556	5.01335	5.46998	1.09108	0.045077	---	ENSRNOT00000054485
17668282	4.75181	5.18648	1.09147	0.00868018	---	GENSCAN00000011702
17607181	4.62046	5.04453	1.09178	0.00466933	---	---
17843371	7.32272	7.99547	1.09187	0.0402384	---	---
17604315	5.40061	5.8968	1.09188	0.0155954	---	---
17714682	5.28625	5.77388	1.09224	0.0252574	Fbxw17	NM_001082409
17828757	4.35839	4.76203	1.09261	0.00557233	Rdh16	NM_199208
17648985	7.01298	7.6626	1.09263	0.0221307	Nos2	NM_012611
17619421	5.02126	5.48816	1.09298	0.0465467	Olr264	NM_001000999
17644895	5.01322	5.47981	1.09307	0.0204689	Ubtd2	XM_006220990
17798510	4.87157	5.32837	1.09377	0.0487218	RGD1305807	NM_001025276
17604211	5.40288	5.91064	1.09398	0.0414031	---	---
17880387	4.9681	5.43635	1.09425	0.00156081	---	ENSRNOT00000041833
17605931	4.89353	5.35726	1.09476	0.018893	---	---
17602221	5.44466	5.96239	1.09509	0.0331059	---	---
17764822	4.55307	4.98744	1.0954	0.0401344	---	---
17652375	4.75771	5.21167	1.09542	0.0264427	Sstr2	NM_019348
17825055	4.46805	4.89516	1.09559	0.0446141	---	GENSCAN00000028823
17771710	4.38874	4.81059	1.09612	0.0280273	Lhx6	NM_001107837
17616960	4.5776	5.02112	1.09689	0.0443562	---	GENSCAN00000022225
17751520	4.69714	5.15226	1.09689	0.0347494	---	ENSRNOT00000080251
17603189	5.957	6.53544	1.0971	0.00258873	---	---
17839498	4.0142	4.40431	1.09718	0.0464584	Cyp2d3	NM_173093
17856249	6.63563	7.28269	1.09751	0.0375614	---	ENSRNOT00000089261
17688094	5.18757	5.69518	1.09785	0.0229318	---	---
17715566	3.00193	3.29663	1.09817	0.0497945	Prl8a3	NM_020079
17763607	4.6139	5.06834	1.09849	0.00300325	Olr475	NM_001000686
17667929	5.53646	6.0829	1.0987	0.011332	Dnajc28	NM_001014124
17717973	4.92523	5.41287	1.09901	0.00442957	Idnk	NM_001037362
17869149	4.44877	4.88928	1.09902	0.00357033	LOC316124	NM_001134566
17788294	4.93146	5.41983	1.09903	0.0368146	Rps4y2	NM_001109612
17873629	3.41344	3.75188	1.09915	0.0482265	LOC100911639	XM_003754801
17721946	4.75613	5.22884	1.09939	0.0351726	Fhod3	NM_001271332
17608579	5.46709	6.02013	1.10116	0.00534223	---	---
17632708	6.66743	7.34653	1.10185	0.0464917	---	ENSRNOT00000080046
17880285	4.42871	4.88172	1.10229	0.019166	LOC690138	XR_592743
17811793	5.44107	5.99899	1.10254	0.0205033	---	ENSRNOT00000085021
17603153	5.08593	5.6113	1.1033	0.00386974	---	---
17761617	4.33992	4.78972	1.10364	1.99736e-05	Cuta	NM_001109341
17669076	4.80288	5.30081	1.10367	0.00200073	B4galt4	NM_001012018
17839754	4.91702	5.42884	1.10409	0.0331448	Celsr1	XM_006226188
17672137	4.9741	5.49441	1.1046	0.0481228	Psmg3	XM_002727941
17700729	4.5842	5.06568	1.10503	0.0378186	---	GENSCAN00000010074
17810722	4.536	5.01246	1.10504	0.01469	Gjb5	NM_019241
17617206	4.19602	4.63733	1.10517	0.0187569	Magel2	XM_001054803
17805996	4.22715	4.67286	1.10544	0.0140714	Necab1	NM_022302
17615597	6.68774	7.39309	1.10547	0.00863214	---	GENSCAN00000050015
17882003	4.71615	5.21395	1.10555	0.0222362	---	NM_031806
17638171	5.1131	5.65423	1.10583	0.0469619	---	NM_001000235
17646227	3.51368	3.88568	1.10587	0.0398024	Olr1453	NM_001000772
17881241	4.72795	5.2287	1.10591	0.039377	---	RPTR-CVE247372-1
17779789	4.74456	5.24874	1.10627	0.0416982	Ankrd60	XM_008762615
17652482	3.72719	4.12397	1.10645	0.0102524	Gpr142	XM_006221032
17877579	3.83562	4.24606	1.10701	0.0143388	Mageb16	NM_001025013
17818715	3.02071	3.34619	1.10775	0.0431929	Mir369	NR_032134
17802269	4.76316	5.27651	1.10777	0.0490657	Csmd2	XM_006225533
17610855	4.22819	4.68492	1.10802	0.0189111	---	ENSRNOT00000087422
17724639	6.77911	7.51139	1.10802	0.0370019	---	ENSRNOT00000081363
17784186	6.94806	7.70354	1.10873	0.0306905	---	ENSRNOT00000087773
17722380	5.46391	6.05859	1.10884	0.0256115	Mir1949	NR_037361
17807281	4.49705	4.9879	1.10915	0.0375637	---	ENSRNOT00000082381
17604605	3.94447e-05	4.37525e-05	1.10921	0.0102213	---	---
17763041	5.4137	6.00515	1.10925	0.0155687	---	---
17790891	3.4128	3.7868	1.10959	0.0173136	Prss37	NM_001108625
17604859	4.55778	5.05741	1.10962	0.0326678	---	---
17791722	3.89543	4.32487	1.11024	0.0272949	---	---
17769388	6.05055	6.72019	1.11067	0.0175274	---	---
17715722	4.03067	4.47697	1.11072	0.047623	Hist1h1t	NM_012579
17635082	5.45945	6.0657	1.11105	0.00707964	B3gnt6	NM_001106211
17709862	7.6103	8.45745	1.11132	0.0488002	---	ENSRNOT00000077419
17721468	4.32588	4.81045	1.11202	0.0225671	Mir3571	NR_037360
17804303	4.63023	5.14912	1.11207	0.00709817	---	ENSRNOT00000070328
17864415	4.15239	4.61881	1.11233	0.0227199	Tmeff2	NM_001108795
17865872	4.26483	4.74498	1.11258	0.0447046	Fam124b	XM_001076121
17612972	4.61025	5.13195	1.11316	0.0225185	---	ENSRNOT00000053809
17629648	4.61025	5.13195	1.11316	0.0225185	---	ENSRNOT00000053809
17605799	4.78987	5.33194	1.11317	0.0106589	---	---
17686742	4.08011	4.5424	1.1133	0.0174267	Atp1a4	NM_001271030
17871172	3.74062	4.16819	1.11431	0.0475765	Eras	NM_001109375
17745371	4.97073	5.53917	1.11436	0.00472048	---	ENSRNOT00000085913
17702546	5.04608	5.6243	1.11459	0.0231487	---	---
17622041	3.68151	4.10639	1.11541	0.0291039	Scgb1c1	NM_001107561
17810192	4.17382	4.65604	1.11553	0.03819	Mir30c1	NR_031839
17738052	4.08583	4.55855	1.1157	0.000473584	RGD1564378	ENSRNOT00000040470
17692574	7.38584	8.24242	1.11598	0.0460707	---	ENSRNOT00000082867
17600453	5.95661	6.6485	1.11615	0.00250656	---	---
17712094	4.26457	4.76156	1.11654	0.0151532	---	ENSRNOT00000077407
17609483	4.3527	4.86001	1.11655	0.0336004	---	---
17724289	7.29397	8.14477	1.11664	0.0469562	---	ENSRNOT00000078900
17760106	4.58819	5.12538	1.11708	0.0181139	Kcnt1	NM_021853
17743823	3.84766	4.30053	1.1177	0.0262254	---	ENSRNOT00000082932
17799942	7.32222	8.18473	1.11779	0.0458873	---	ENSRNOT00000078595
17665264	4.45781	4.98456	1.11816	0.0459127	Tmem45al	XM_003751037
17707424	3.55548	3.9784	1.11895	0.0219307	---	ENSRNOT00000082777
17605435	4.36186	4.88247	1.11936	0.043054	---	---
17839058	4.84435	5.42503	1.11987	0.0242283	Card10	NM_001130554
17702281	3.98989	4.4709	1.12056	0.0105599	---	GENSCAN00000019563
17871187	4.40328	4.93766	1.12136	0.0478985	---	ENSRNOT00000091939
17615410	3.87749	4.3515	1.12225	0.0469877	Atp4a	NM_012509
17816066	3.86508	4.3377	1.12228	0.0218115	---	GENSCAN00000051684
17635628	4.17278	4.68785	1.12343	0.0167681	Hbe2	NM_001024805
17881249	3.25512	3.65794	1.12375	0.0187362	---	RPTR-J01347-1
17620691	4.52158	5.08134	1.1238	0.0323233	Tbx6	NM_001108920
17709287	4.66537	5.24547	1.12434	0.0416854	---	ENSRNOT00000057740
17721670	4.92131	5.5351	1.12472	0.0362086	---	---
17882885	4.92131	5.5351	1.12472	0.0362086	---	---
17698236	3.98605	4.48402	1.12493	0.0293924	---	GENSCAN00000058642
17692360	4.8616	5.47229	1.12562	0.0150763	---	GENSCAN00000021500
17609583	4.6118	5.1928	1.12598	0.0270739	---	---
17715142	4.69848	5.29076	1.12606	0.0174711	---	GENSCAN00000056693
17720057	4.87958	5.50076	1.1273	0.0405242	LOC100362965	XM_002725291
17880220	4.09414	4.6183	1.12803	0.0239041	---	---
17601895	4.89451	5.52151	1.1281	0.0400809	---	---
17723497	5.39861	6.09181	1.1284	0.0328782	---	GENSCAN00000027368
17707900	4.12276	4.65625	1.1294	0.0415102	---	ENSRNOT00000084135
17778030	3.78717	4.27773	1.12953	0.0252169	---	ENSRNOT00000046355
17645787	3.88099	4.38427	1.12968	0.0408446	Shroom1	XM_006220672
17747031	4.45032	5.02802	1.12981	0.0155213	---	ENSRNOT00000085327
17838637	3.97907	4.49634	1.13	0.00834574	Scrt1	NM_001130570
17863607	3.31815	3.74969	1.13005	0.0326125	---	GENSCAN00000008441
17647227	4.72827	5.34423	1.13027	0.00326075	Mfsd6l	NM_001105787
17792133	4.24174	4.79499	1.13043	0.01687	Smyd1	NM_001106595
17719505	7.40685	8.37386	1.13056	0.0461169	---	ENSRNOT00000081299
17610327	4.29433	4.86126	1.13202	0.0177169	---	GENSCAN00000022727
17726318	4.80344	5.43809	1.13212	0.0190939	---	---
17746342	3.74102	4.23571	1.13223	0.0291082	---	---
17817269	4.4179	5.00692	1.13333	0.0165936	Papln	XM_006225840
17854027	4.58466	5.20015	1.13425	0.00136679	Tmod2	NM_031613
17866256	4.37576	4.96543	1.13476	0.0125342	Ngef	NM_001136241
17604931	5.01158	5.69005	1.13538	0.0194503	---	---
17603751	4.87158	5.53534	1.13625	0.006993	---	---
17871859	3.43795	3.908	1.13672	0.0295954	Mirlet7f-2	NR_031807
17604457	4.42909	5.03592	1.13701	0.025472	---	---
17708246	4.6461	5.28276	1.13703	0.0185454	---	---
17703572	3.38125	3.84677	1.13768	0.0165273	---	---
17635417	3.57591	4.06831	1.1377	0.0285871	Lrtomt	NM_001139494
17624985	4.85623	5.52561	1.13784	0.016317	Mbl2	NM_022704
17604349	4.46886	5.08609	1.13812	0.0244499	---	---
17607075	3.48561	3.97056	1.13913	0.022528	---	---
17600041	4.11227	4.68505	1.13928	0.0446912	---	---
17781033	4.70035	5.35612	1.13952	0.0404272	---	---
17799408	5.28637	6.02416	1.13956	0.020448	Mir3084c	NR_128676
17634578	3.57031	4.06866	1.13958	0.0253396	Bnc1	NM_001108916
17761755	3.60498	4.11302	1.14093	0.00804423	Olr396	NM_001000831
17880802	3.67352	4.1922	1.14119	0.0383082	---	---
17831119	3.93473	4.49258	1.14178	0.0101043	Mir33	NR_031847
17685625	3.72617	4.2569	1.14243	0.0395302	---	ENSRNOT00000077104
17670072	3.80985	4.35337	1.14266	0.00334912	---	---
17882111	4.61271	5.27134	1.14278	0.0318955	---	NM_001127591
17646726	3.91786	4.47778	1.14291	0.0195091	Trim16	NM_001135033
17751193	3.61671	4.13966	1.14459	0.0428005	RGD1306519	XR_344653
17856610	4.34298	4.97396	1.14529	0.0155054	Lyzl4	NM_001246183
17622674	5.32753	6.10732	1.14637	0.00496817	---	---
17857131	4.07398	4.67548	1.14765	0.0106075	Apobec2	NM_001106883
17616249	4.05326	4.65357	1.14811	0.0151101	Tead2	NM_001107512
17865430	2.90819	3.33962	1.14835	0.00515211	---	---
[truncated: 226 more rows]

## Sheet: female BPA50 vs Control female
Probe_ID	Female Control, FC (avg exp)	female BPA50, fBPA50 (avg exp)	fBPA50 vs FC (fold change)	fBPA50 vs FC (adj p-value)	Gene Symbol	mRNA Accession
17626893	2.06013	0.370765	-5.55643	0.00450478	Ces2i	XM_001074128
17601989	2.85553	0.548657	-5.20459	0.00988171	---	---
17784060	1.54732	0.304195	-5.08662	0.0411387	---	ENSRNOT00000082621
17645053	1.80522	0.506438	-3.56455	0.0112957	---	---
17728026	2.93868	1.19235	-2.46461	0.022512	---	ENSRNOT00000082018
17600941	3.69079	1.58599	-2.32712	0.0428051	---	---
17601275	3.69079	1.58599	-2.32712	0.0428051	---	---
17787050	2.58644	1.11912	-2.31115	0.0102735	---	---
17614006	2.96672	1.29109	-2.29785	0.0329016	---	ENSRNOT00000084949
17708049	2.58973	1.2146	-2.13217	0.0242625	---	ENSRNOT00000063768
17609183	3.24678	1.61913	-2.00526	0.02652	---	---
17791616	2.66346	1.33033	-2.00211	0.0258333	Vom1r77	NM_001008926
17606659	4.42474	2.23985	-1.97547	0.0175467	---	---
17607185	3.54506	1.87427	-1.89144	0.0349087	---	---
17607047	3.39337	1.80864	-1.8762	0.0404421	---	---
17606469	3.86547	2.174	-1.77804	0.0397102	---	---
17860177	1.51596	0.866994	-1.74853	0.00746355	---	ENSRNOT00000091516
17600413	4.94541	2.91258	-1.69795	0.0222894	---	---
17833262	3.3876	2.05607	-1.64761	0.0420597	Olr1058	NM_001000066
17602055	3.58606	2.22433	-1.6122	0.0280723	---	---
17606303	4.24764	2.77387	-1.5313	0.0413096	---	---
17609833	4.23474	2.8844	-1.46815	0.0254483	---	---
17712292	3.54071	2.42416	-1.46059	0.0255803	---	ENSRNOT00000090682
17727712	2.93617	2.01381	-1.45802	0.00268893	LOC100910721	XM_003751828
17818447	2.75055	1.91925	-1.43314	0.0328389	---	ENSRNOT00000078011
17689278	2.45612	1.71543	-1.43179	0.0114208	---	ENSRNOT00000054495
17607079	3.71458	2.60115	-1.42805	0.0466445	---	---
17608755	3.60266	2.52483	-1.4269	0.0403371	---	---
17602987	3.61833	2.54496	-1.42177	0.0431708	---	---
17702041	2.7523	1.95798	-1.40568	0.0317623	---	---
17763124	2.6209	1.86645	-1.40422	0.0411806	---	---
17782245	3.64756	2.60212	-1.40177	0.0488877	Mir3587	NR_037383
17760090	3.36301	2.40816	-1.3965	0.0119626	LOC100359989	XM_002726069
17600051	3.71286	2.66981	-1.39068	0.0401249	---	---
17633780	3.89999	2.81234	-1.38674	0.0371508	LOC103691155	XM_008759570
17824947	5.19867	3.76068	-1.38237	0.0104351	---	ENSRNOT00000048010
17842866	3.81956	2.83835	-1.3457	0.0149819	---	ENSRNOT00000078181
17601995	3.40956	2.54311	-1.3407	0.0155593	---	---
17633277	3.60782	2.70576	-1.33338	0.0204754	Mrgprb3	XM_001077174
17619435	3.86046	2.90707	-1.32796	0.012677	Olr276	NM_001000227
17791704	3.39483	2.58326	-1.31417	0.0424115	---	ENSRNOT00000086788
17656445	3.95311	3.01307	-1.31199	0.0245205	---	GENSCAN00000022788
17766023	4.69289	3.58057	-1.31066	0.00361227	Spdye18	NM_001024312
17693277	2.9435	2.2584	-1.30335	0.0334076	LOC685667	XM_006227207
17604799	4.17888	3.20856	-1.30242	0.00690551	---	---
17607651	4.8863	3.75915	-1.29984	0.0195445	---	---
17609069	4.8863	3.75915	-1.29984	0.0195445	---	---
17607829	3.64526	2.83015	-1.28801	0.00272772	Apip	---
17607881	3.64526	2.83015	-1.28801	0.00272772	Apip	---
17605853	4.7858	3.72657	-1.28424	0.0310299	---	---
17851369	3.44196	2.68882	-1.2801	0.00727216	Olr1335	NM_001000479
17607301	5.06505	3.95859	-1.27951	0.0288983	---	---
17601017	4.2437	3.33107	-1.27398	0.0403095	---	---
17601351	4.2437	3.33107	-1.27398	0.0403095	---	---
17605917	3.76262	2.96231	-1.27017	0.0180142	---	---
17606887	4.69969	3.7052	-1.2684	0.0105201	---	---
17755328	3.86135	3.04636	-1.26753	0.0401879	---	---
17644304	3.76925	2.98367	-1.2633	0.0299484	---	ENSRNOT00000063374
17882779	3.76925	2.98367	-1.2633	0.0299484	---	ENSRNOT00000063374
17606279	4.27544	3.40224	-1.25665	0.0371135	---	---
17718732	3.14506	2.50338	-1.25633	0.0403241	---	GENSCAN00000054668
17666510	4.05791	3.2399	-1.25248	0.0289943	---	ENSRNOT00000054449
17701231	3.99846	3.19659	-1.25085	0.0469434	---	ENSRNOT00000089330
17857689	4.36301	3.50379	-1.24522	0.00900035	Znrd1-as1	NM_001109479
17669071	3.34894	2.68982	-1.24504	0.0346637	---	ENSRNOT00000078654
17728879	3.56876	2.87419	-1.24166	0.0129977	---	ENSRNOT00000080045
17600429	5.37456	4.33361	-1.2402	0.0216758	---	---
17612974	4.28027	3.45188	-1.23998	0.00262872	Vom1r37	NM_001008923
17654396	4.91473	3.96459	-1.23965	0.035507	Dnase1l2	XM_001057412
17752311	4.22711	3.41286	-1.23859	0.0468221	Olr1737	NM_001001422
17799406	2.99733	2.43032	-1.23331	0.0360535	---	ENSRNOT00000078618
17819850	3.6846	2.99192	-1.23152	0.0400092	---	ENSRNOT00000087571
17754529	4.31875	3.51098	-1.23007	0.025541	Slc5a4b	XM_008772932
17767085	4.41064	3.59451	-1.22705	0.0281633	Cst12	ENSRNOT00000006608
17605019	4.53891	3.71452	-1.22194	0.00929878	---	---
17808538	4.12973	3.38477	-1.22009	0.00280634	Ifna16l1	XM_575856
17767047	4.52826	3.71554	-1.21874	7.81027e-05	Foxa2	ENSRNOT00000066588
17714898	4.43615	3.64007	-1.2187	0.0108598	---	---
17608355	3.78852	3.11315	-1.21694	0.0438059	---	---
17606417	4.53811	3.72936	-1.21686	0.0302534	---	---
17797244	3.76236	3.1014	-1.21311	0.0266644	---	GENSCAN00000052469
17815372	4.00815	3.30598	-1.21239	0.0396174	---	---
17882985	4.00815	3.30598	-1.21239	0.0396174	---	---
17873738	5.13744	4.23852	-1.21208	0.00495098	Nap1l3	---
17609439	5.72047	4.71981	-1.21201	0.0312583	---	---
17645017	3.0935	2.5562	-1.2102	0.0397514	Mir218-2	NR_031930
17813562	4.7804	3.95968	-1.20727	0.0368212	---	GENSCAN00000049249
17613537	4.07977	3.38259	-1.20611	0.0486464	Obox1	XM_003753255
17883137	4.12096	3.42256	-1.20406	0.00066675	---	RNCR3
17774268	3.51889	2.92404	-1.20344	0.0418722	Olr641	NM_001000643
17635729	3.26562	2.71398	-1.20326	0.0444491	Olr183	NM_001000181
17881435	4.93663	4.10644	-1.20217	0.00506095	Zbtb7c	NM_001127375
17774325	3.96437	3.29778	-1.20213	0.00930437	Olr690	NM_001000569
17607521	4.40499	3.6706	-1.20007	0.0432546	---	---
17608939	4.40499	3.6706	-1.20007	0.0432546	---	---
17625488	4.17516	3.47918	-1.20004	0.0488224	LOC100361547	XM_008759635
17617900	4.77636	3.98085	-1.19984	0.0400898	---	ENSRNOT00000082229
17651595	4.62068	3.85244	-1.19942	0.00219481	Higd1b	NM_001105844
17794815	5.56527	4.647	-1.19761	0.00858048	Lrrc23	NM_001013165
17809583	4.27144	3.56703	-1.19748	0.0177168	---	ENSRNOT00000079236
17603965	5.39857	4.51434	-1.19587	0.00783746	---	---
17702209	4.13907	3.46675	-1.19393	0.0249809	Sall2	NM_001107262
17851355	4.49618	3.76693	-1.19359	0.00878614	RGD1560789	ENSRNOT00000035386
17818407	4.3157	3.61639	-1.19337	0.0284591	Mir433	NR_031954
17608227	4.84417	4.06381	-1.19203	0.0171898	---	---
17748203	3.9468	3.31405	-1.19093	0.0435633	---	---
17853483	5.38711	4.52781	-1.18978	0.0356461	---	ENSRNOT00000077608
17606007	5.08659	4.27958	-1.18857	0.0123697	---	---
17609451	5.13585	4.32475	-1.18755	0.0347296	---	---
17603555	5.5726	4.70138	-1.18531	0.0153383	---	---
17824940	6.82519	5.76051	-1.18482	0.00172976	---	ENSRNOT00000040523
17742150	3.79985	3.20977	-1.18384	0.0145299	---	ENSRNOT00000078452
17629867	3.01441	2.54668	-1.18366	0.0194548	Vom2r33	NM_001099497
17623958	4.31782	3.65193	-1.18234	0.0387771	---	---
17634523	4.96187	4.19748	-1.18211	0.0224595	---	---
17602047	4.75524	4.02721	-1.18078	0.042751	---	---
17843657	4.2033	3.56101	-1.18037	0.043246	---	ENSRNOT00000078659
17710750	4.53971	3.84713	-1.18003	0.0226477	---	GENSCAN00000047978
17685599	4.54776	3.85479	-1.17977	0.0332205	Axdnd1	XM_008762896
17609909	5.07962	4.3083	-1.17903	0.005153	Tm2d1	---
17680423	5.13548	4.36819	-1.17565	0.0284	---	NONRATT016430
17609915	5.79148	4.92655	-1.17556	0.0120931	---	---
17603759	5.10998	4.34914	-1.17494	0.04337	---	---
17606933	5.48295	4.66745	-1.17472	0.0111552	---	---
17633882	4.08785	3.48073	-1.17443	0.0104666	---	GENSCAN00000031039
17633665	4.65294	3.96205	-1.17438	0.0427527	Mkrn3	XM_001057262
17780379	4.50039	3.8324	-1.1743	0.0247633	---	---
17878685	4.78827	4.08058	-1.17343	0.0276596	Nap1l3	NM_133402
17796700	4.55829	3.88608	-1.17298	0.0359305	LOC100912291	XR_346305
17808518	4.21377	3.59824	-1.17106	0.0240596	LOC103692403	XR_592584
17609875	4.0448	3.45871	-1.16945	0.0476234	---	---
17883644	4.22195	3.61169	-1.16897	0.0179567	---	---
17605397	5.32444	4.55653	-1.16853	0.0056423	Cnot7	---
17635673	4.49146	3.84499	-1.16813	0.0191888	Olr150	NM_001000739
17679373	4.49222	3.84614	-1.16798	0.0324502	---	---
17608825	4.28789	3.67453	-1.16692	0.0395343	---	---
17852857	3.9855	3.41614	-1.16667	0.0305815	---	ENSRNOT00000087436
17806786	5.21134	4.46969	-1.16593	0.0414107	Sit1	NM_001024344
17600465	5.69777	4.88721	-1.16585	0.00556934	Gdi2	---
17723019	5.17452	4.44531	-1.16404	0.0104038	---	GENSCAN00000049718
17609237	4.24187	3.64491	-1.16378	0.0138849	---	---
17601917	5.01517	4.30946	-1.16376	0.0447633	---	---
17633202	3.78266	3.25182	-1.16324	0.0394514	---	ENSRNOT00000078692
17797213	4.74584	4.08217	-1.16258	0.013671	---	---
17835652	4.52298	3.89439	-1.16141	0.0304472	---	---
17881279	4.69612	4.04435	-1.16116	0.0196999	---	RPTR-M10961-4
17618059	4.98906	4.29741	-1.16095	0.0463779	---	---
17603577	5.55189	4.78232	-1.16092	0.00610786	Api5	---
17877456	4.46468	3.84647	-1.16072	0.0286372	Cldn34e	NM_001109415
17836781	4.65609	4.0132	-1.16019	0.00835314	---	GENSCAN00000045530
17734470	4.27904	3.68828	-1.16017	0.030514	Fam89a	NM_001011711
17664495	4.33449	3.73621	-1.16013	0.0426551	---	GENSCAN00000019990
17754983	4.84119	4.17343	-1.16	0.011232	Pcbd1	NM_001007601
17881030	4.83046	4.16877	-1.15873	0.00277979	---	---
17616100	3.43522	2.96483	-1.15866	0.0486782	Izumo2	XM_006223266
17763689	3.74821	3.24181	-1.15621	0.0363982	Olr594	NM_001000657
17813354	4.75471	4.11374	-1.15581	0.0364697	Mir429	NR_031949
17614808	3.69097	3.19613	-1.15483	0.0113439	---	ENSRNOT00000090995
17623158	4.29263	3.71814	-1.15451	0.0242006	---	NONRATT002972
17711153	4.78041	4.14342	-1.15373	0.0466804	---	ENSRNOT00000085777
17681666	5.11945	4.43962	-1.15313	0.0448747	Gpa33	NM_001191829
17880901	3.80738	3.30181	-1.15312	0.0255456	---	GENSCAN00000044451
17778164	4.58733	3.97857	-1.15301	0.0420586	Vsx1	NM_001109546
17609883	5.04209	4.37379	-1.1528	0.0392559	---	---
17652017	4.86222	4.21846	-1.1526	0.00117478	Ace3	NM_001258237
17615434	5.08914	4.42803	-1.1493	0.0249695	Sbsn	NM_001044231
17604783	4.86382	4.23369	-1.14884	0.0218266	---	---
17746854	3.9475	3.43631	-1.14876	0.0257664	---	---
17797440	4.30502	3.74759	-1.14874	0.0436596	---	GENSCAN00000009492
17766552	5.58701	4.86461	-1.1485	0.023914	Bmp2	NM_017178
17824855	8.30674	7.24149	-1.1471	0.0302896	LOC100359684	XM_008764999
17697622	4.47304	3.89945	-1.1471	0.00898642	Fam107a	NM_001025129
17604173	4.9706	4.3344	-1.14678	0.020486	---	---
17881313	4.57714	3.99301	-1.14629	0.0304528	---	RPTR-U57609-2
17878662	4.33331	3.78052	-1.14622	0.0192291	---	---
17600037	5.36654	4.68237	-1.14612	0.0301367	---	---
17739152	4.63254	4.04221	-1.14604	0.0114818	Mir16	NR_031817
17737285	3.96703	3.46472	-1.14498	0.0241589	---	---
17763067	4.60143	4.01955	-1.14476	0.0491621	---	XM_006224627
17880505	3.89526	3.40346	-1.1445	0.0315385	RGD1565369	XM_001053809
17722740	4.05905	3.54696	-1.14437	0.0397417	Rell2	NM_001014149
17702608	4.2558	3.7214	-1.1436	0.0346881	Olr1646	NM_001000103
17736692	5.15097	4.50501	-1.14339	0.000111576	snoRNA	ENSRNOT00000080526
17738401	3.60949	3.1584	-1.14282	0.00983213	---	---
17633636	3.98499	3.48747	-1.14266	0.0472089	---	GENSCAN00000057058
17774283	3.50292	3.06883	-1.14145	0.0216827	Olr657	NM_001000343
17605589	4.79517	4.20096	-1.14145	0.0342842	---	---
17838196	4.54496	3.98295	-1.14111	0.0329489	Cyp11b3	NM_181824
17659942	4.35527	3.81692	-1.14104	0.0091307	Nog	NM_012990
17609549	5.91908	5.18771	-1.14098	0.00342688	Suds3	---
17606259	6.06653	5.31886	-1.14057	0.0316793	---	---
17762220	4.52155	3.96582	-1.14013	0.0386357	---	ENSRNOT00000083238
17841062	4.76226	4.17851	-1.1397	0.0253192	---	---
17842209	3.43103	3.01141	-1.13934	0.043754	---	---
17639613	4.46127	3.91582	-1.13929	0.0239473	Ovol1	NM_001107572
17819160	5.40817	4.75047	-1.13845	0.0446387	Zbtb42	NM_001126302
17804058	4.07472	3.58012	-1.13815	0.00260571	---	GENSCAN00000043371
17880937	4.78751	4.20862	-1.13755	0.0359362	---	GENSCAN00000029528
17609867	5.36902	4.72286	-1.13682	0.0255679	---	---
17690171	4.67644	4.11434	-1.13662	0.0197678	Lgi2	NM_001107219
17601721	5.10688	4.49496	-1.13614	0.0370356	---	---
17606363	5.47793	4.82172	-1.13609	0.0212902	---	---
17708820	4.68047	4.12785	-1.13388	0.02332	---	ENSRNOT00000086129
17604235	5.02044	4.43557	-1.13186	0.00220522	Slc35c1	---
17609269	5.57938	4.93173	-1.13132	0.016957	---	---
17635738	4.74884	4.20212	-1.13011	0.0394052	Olr193	NM_001000186
17699755	4.77	4.22157	-1.12991	0.0224191	Pnma2	NM_001107272
17848271	4.5748	4.04904	-1.12985	0.0180465	Prss44	NM_001109298
17634776	4.44673	3.93705	-1.12946	0.0119365	Olr29	NM_001000691
17668696	4.794	4.24543	-1.12921	0.0215738	Myh15	XM_008757815
17606975	5.30661	4.70147	-1.12871	0.0334154	---	---
17850757	5.34195	4.7331	-1.12864	0.0419812	St14	NM_053635
17602061	5.27671	4.67697	-1.12823	0.00611491	Gpr162	---
17748431	4.64587	4.11848	-1.12805	0.0036254	Mab21l2	NM_001109391
17846431	4.90104	4.34639	-1.12761	0.0418648	Mrap2	NM_001108774
17768497	5.17587	4.59093	-1.12741	0.0297164	---	ENSRNOT00000087538
17742949	4.61945	4.09784	-1.12729	0.0350352	Ddit4l	XM_002729121
17827966	4.98088	4.41945	-1.12704	0.044065	---	ENSRNOT00000090516
17698448	5.0366	4.47073	-1.12657	0.00889391	---	---
17882473	4.84571	4.3023	-1.12631	0.017226	---	XM_001072891
17881401	5.57151	4.94703	-1.12623	0.0181968	---	NM_001101015
17609815	5.18313	4.60236	-1.12619	0.018865	---	---
17764518	4.97508	4.41814	-1.12606	0.00279448	Kcna4	NM_012971
17787691	4.64112	4.12229	-1.12586	0.0382201	Bcl2l14	NM_001024338
17676012	4.94237	4.39187	-1.12534	0.0137456	---	GENSCAN00000036104
17660257	5.01241	4.45422	-1.12532	0.0332082	Tmem92	XM_008768249
17732725	6.15827	5.47553	-1.12469	0.0365864	---	---
17714079	4.21294	3.74601	-1.12465	0.0317389	Spata31d1d	NM_001134606
17882831	5.56615	4.95084	-1.12428	0.0168174	---	NONRATT015812
17791916	7.61858	6.77841	-1.12395	0.0212974	---	ENSRNOT00000074445
17635528	5.61368	4.99628	-1.12357	0.0252875	Olr51	NM_001001021
17606729	5.55064	4.94138	-1.1233	0.0290408	---	---
17878161	6.04498	5.38181	-1.12323	0.0011687	Cited1	NM_172055
17688092	5.45665	4.85879	-1.12305	0.0290618	---	---
17658370	5.15298	4.5889	-1.12292	0.0166435	Slc13a5	NM_170668
17882261	5.3677	4.78045	-1.12284	0.00967506	---	XM_002724675
17761854	5.79077	5.16207	-1.12179	0.00644549	no hit	---
17794339	4.79643	4.27693	-1.12146	0.0457324	Wnt5b	NM_001100489
17881935	5.70819	5.09013	-1.12142	0.0394251	---	ENSRNOT00000072063
17799870	5.33425	4.7595	-1.12076	0.034238	---	---
17600817	6.22431	5.55566	-1.12035	0.0146184	---	---
17877718	5.38148	4.80397	-1.12021	0.0299136	RGD1561382	XM_001064013
17659365	4.92918	4.40046	-1.12015	0.0321135	Heatr9	XM_006220751
17606261	5.76894	5.15094	-1.11998	0.0488734	---	---
17603249	5.58295	4.98568	-1.1198	0.0436227	---	---
17770130	5.37706	4.80248	-1.11964	0.00471037	Noxa1	NM_001100171
17654714	4.76386	4.25484	-1.11963	0.00852749	Mir3547	NR_037321
17816841	5.1634	4.61382	-1.11912	0.0431233	---	NONRATT046973
17768668	5.50923	4.92293	-1.1191	0.0133236	Tox2	NM_199392
17648012	4.26952	3.81628	-1.11877	0.0181354	---	ENSRNOT00000069768
17882335	4.58598	4.09914	-1.11876	0.0391898	---	XM_008774194
17603155	5.87488	5.25578	-1.1178	0.0277094	---	---
17685929	4.79395	4.28925	-1.11767	0.0368702	RGD1309106	NM_001014130
17780057	4.80268	4.2979	-1.11745	0.0268054	Nkain4	NM_001106550
17779078	5.04505	4.51525	-1.11734	0.0291888	Jph2	NM_001037974
17619053	4.81015	4.30502	-1.11733	0.000428852	Olr59	NM_173293
17627574	4.33122	3.87673	-1.11724	0.0389733	---	GENSCAN00000014476
17672878	5.92324	5.30174	-1.11723	0.00507304	Ssc4d	XM_001077242
17812281	4.51768	4.04474	-1.11693	0.0359707	Pramef12	XM_006225597
17882577	5.03332	4.50661	-1.11688	0.0240192	---	XM_006227553
17834496	5.00645	4.48401	-1.11651	0.0380338	RGD1566251	XM_008765268
17787128	5.89015	5.27554	-1.1165	0.0218457	---	---
17794908	5.077	4.5492	-1.11602	0.0212124	Lag3	NM_212513
17857472	4.84022	4.33725	-1.11597	0.0426517	Gnmt	NM_017084
17605443	5.58359	5.00375	-1.11588	0.0360321	---	---
17675050	5.10452	4.57742	-1.11515	0.0373565	Tgfbr3l	XM_001067872
17814334	5.5433	4.97187	-1.11493	0.00726669	---	GENSCAN00000018776
17707428	4.80062	4.30845	-1.11423	0.0304486	Npy5r	XM_006253013
17860356	4.92988	4.42681	-1.11364	0.0171708	Catip	XM_001074457
17608885	6.46965	5.81085	-1.11337	0.0339756	---	---
17711009	4.86324	4.36816	-1.11334	0.00932892	Mef2b	NM_001017507
17840175	4.88152	4.38505	-1.11322	0.0318368	Syt10	NM_031666
17629290	4.94189	4.44149	-1.11266	0.00464556	Mir290	NR_031937
17712437	5.01016	4.50305	-1.11261	0.000961745	snRNA	ENSRNOT00000081241
17743669	4.959	4.45814	-1.11235	0.0126564	Mir186	NR_031904
17842699	5.38123	4.83935	-1.11197	0.0214611	---	---
17649132	5.69001	5.11803	-1.11176	0.000774955	Tp53i13	NM_001105818
17824318	5.6778	5.10709	-1.11175	0.0144697	Wdr25	NM_001135894
17862356	5.80962	5.22897	-1.11104	0.00366722	Yes1	NM_033298
17789270	4.97154	4.47615	-1.11067	0.0379037	---	ENSRNOT00000091433
17845663	4.7462	4.2744	-1.11038	0.0370303	Aldh1a2	NM_053896
17846176	4.08679	3.68125	-1.11016	0.0242605	---	GENSCAN00000014656
17762178	4.98941	4.49577	-1.1098	0.0300789	RGD1564306	XM_001066066
17607681	5.68198	5.12079	-1.10959	0.034467	---	---
17609099	5.68198	5.12079	-1.10959	0.034467	---	---
17881771	4.78312	4.31143	-1.10941	0.0474827	---	---
17651028	6.73393	6.0707	-1.10925	0.0358378	Krtap31-1	NM_001109409
17881371	5.58733	5.03707	-1.10924	0.0337394	---	XM_006223932
17874027	5.52338	4.98028	-1.10905	0.0428836	Arxes2	XM_006227467
17853965	5.40893	4.87787	-1.10887	0.0346874	---	ENSRNOT00000091386
17604877	5.32017	4.79943	-1.1085	0.0460588	---	---
17695172	5.41724	4.8884	-1.10818	0.0429414	Afap1	XM_008770245
17734535	5.16601	4.66179	-1.10816	0.0446748	LOC102547637	XR_342447
17674212	4.43409	4.00168	-1.10806	0.0476635	Oas1e	NM_001009492
17606871	5.07671	4.58204	-1.10796	0.00537667	Galnt6	---
17862752	5.81685	5.25303	-1.10733	0.0438053	Klc4	NM_001009601
17613890	5.15779	4.65885	-1.10709	0.0180821	---	---
17715332	5.27297	4.76504	-1.1066	0.0244545	Tubb2b	NM_001013886
17602013	5.28563	4.77858	-1.10611	0.0400003	---	---
17619437	6.34027	5.73297	-1.10593	0.015655	Nlrp10	NM_001106291
17678372	5.17087	4.68059	-1.10475	0.00960128	RGD1562310	NM_001109066
17624558	5.04985	4.5714	-1.10466	0.0435683	Trpm3	NM_001191562
17686515	4.5457	4.11572	-1.10447	0.0382762	Fcrlb	NM_001191931
17866346	4.99646	4.52447	-1.10432	0.0320462	Iqca1	XM_001066515
17764288	7.2563	6.57417	-1.10376	0.00240317	Pamr1	NM_001107755
17820861	7.43482	6.74044	-1.10302	0.0483715	RGD1559683	NM_001109275
17608833	6.08266	5.51571	-1.10279	0.01995	---	---
17686990	4.29205	3.89268	-1.10259	0.0437535	Mir350	NR_031794
17671144	4.9908	4.52685	-1.10249	0.0332449	---	GENSCAN00000010332
17693694	4.22516	3.83271	-1.10239	0.0494725	Vcsa2	NM_198729
17786661	5.47607	4.96751	-1.10238	0.00815	Slc25a18	NM_001044280
17747823	5.21061	4.7299	-1.10163	0.0458093	Shox2	NM_013028
17855615	5.59587	5.08014	-1.10152	0.00258028	Sema3f	NM_001108185
17603041	5.80798	5.27288	-1.10148	0.0396725	---	---
17841232	5.69523	5.17073	-1.10144	0.00546253	Galnt6	NM_001172063
17661189	5.66527	5.14416	-1.1013	0.00320347	Krt34	NM_001008758
17777209	6.06915	5.51137	-1.10121	0.0142662	Pdyn	NM_019374
17840689	4.94177	4.4884	-1.10101	0.0170185	Zfp641	NM_001106792
17646050	5.33075	4.84218	-1.1009	0.0460419	---	---
17601075	6.87759	6.25394	-1.09972	0.00657564	---	---
17601409	6.87759	6.25394	-1.09972	0.00657564	---	---
17674357	6.64263	6.0424	-1.09934	0.0494531	---	---
17713107	5.09556	4.63756	-1.09876	0.0061884	misc RNA	---
17603537	4.64432	4.22729	-1.09865	0.0305663	---	---
17681254	5.19377	4.72818	-1.09847	0.0355173	---	NONRATT016633
17706302	5.32969	4.85209	-1.09843	0.0300148	Ogdhl	NM_001106062
17654512	5.77119	5.25466	-1.0983	0.00851794	Slc9a3r2	NM_053811
17827113	5.87886	5.3536	-1.09811	0.0457874	---	ENSRNOT00000090020
17602575	5.73678	5.22814	-1.09729	0.0215019	---	---
17870567	5.3638	4.89065	-1.09675	0.0152723	RGD1560927	NM_001109315
17864155	5.05976	4.61465	-1.09646	0.0356846	LOC102547353	NR_132639
17824656	6.12644	5.58841	-1.09628	0.023957	---	ENSRNOT00000079301
17764619	5.28769	4.8243	-1.09605	0.0362632	Olr756	NM_001000614
17813036	6.31163	5.75851	-1.09605	0.0124928	Hes3	NM_022687
17660939	4.89925	4.47018	-1.09599	0.0323635	Krt24	NM_001004131
17628982	4.68197	4.27288	-1.09574	0.0399669	Has1	NM_172323
17764202	5.19554	4.74225	-1.09559	0.0484915	Chst1	NM_001011955
17607675	4.9616	4.5296	-1.09537	0.0454465	---	---
17609093	4.9616	4.5296	-1.09537	0.0454465	---	---
17600485	5.13492	4.68906	-1.09509	0.0123271	---	---
17611655	6.2223	5.68223	-1.09505	0.0404546	Synj2	NM_001113371
17856353	4.98118	4.54902	-1.095	0.0306323	Plcd1	NM_017035
17881191	6.33825	5.78934	-1.09481	0.00343089	no hit	RPTR-AF292560-1
17605487	6.70403	6.12387	-1.09474	0.0208016	---	---
17627707	5.68562	5.19418	-1.09461	0.0231266	Moxd1	XM_001054130
17655907	5.02278	4.58939	-1.09444	0.0358987	Znf454	XM_006220658
17604411	5.71341	5.22079	-1.09436	0.0345512	---	---
17702761	5.77607	5.27931	-1.0941	0.0163484	Slc22a17	NM_177421
17843017	5.99551	5.48029	-1.09401	0.0150523	Rpusd4	NM_001025284
17791329	5.30256	4.84776	-1.09382	0.00983393	Npvf	NM_023952
17698254	5.57188	5.0947	-1.09366	0.0209443	---	ENSRNOT00000073533
17681241	5.50247	5.03252	-1.09338	0.00819814	---	---
17606167	6.61843	6.05409	-1.09322	0.0163524	---	---
17763877	4.95394	4.53195	-1.09311	0.00929454	C1qtnf4	NM_001107745
17754281	5.53661	5.06551	-1.093	0.023027	LOC690478	NM_001109595
17831494	4.23875	3.87808	-1.093	0.0490783	---	ENSRNOT00000052473
17709285	5.07196	4.64049	-1.09298	0.0155353	---	ENSRNOT00000057740
17609935	6.0938	5.5755	-1.09296	0.0484663	---	---
17839926	5.73746	5.24964	-1.09292	0.0158178	Mapk12	NM_021746
17725991	5.55938	5.08832	-1.09258	0.0295283	Gpr151	NM_181633
17755739	4.87141	4.4593	-1.09242	0.0459988	---	GENSCAN00000055553
17866320	5.57366	5.10232	-1.09238	0.033897	---	NM_001306054
17804042	4.4846	4.10641	-1.0921	0.0329542	---	GENSCAN00000059327
17609835	5.75112	5.26665	-1.09199	0.0393021	---	---
17796225	5.97166	5.46919	-1.09187	0.00626369	Kcnj8	NM_017099
17649180	4.80164	4.39828	-1.09171	0.0153071	Mir423	NR_032276
17648707	5.75444	5.27107	-1.0917	0.0196735	Dbil5	NM_021596
17800635	6.27907	5.75219	-1.0916	0.0151163	Glis1	XM_006225448
17810547	4.49914	4.12215	-1.09145	0.0108408	---	---
17604551	5.187	4.75564	-1.09071	0.0338	---	---
17811841	5.9404	5.44769	-1.09044	0.00109272	Pax7	NM_001191984
17774148	5.89282	5.40444	-1.09037	0.0188328	Olr505	NM_001000679
17606739	6.34982	5.82378	-1.09033	0.0443311	---	---
17795358	5.62626	5.16042	-1.09027	0.000803832	Clec2e	NM_001177689
17825118	4.94048	4.53238	-1.09004	0.043748	LOC691950	XM_008765008
17633198	8.07642	7.40992	-1.08995	0.0298965	---	ENSRNOT00000078692
17608435	6.40931	5.88123	-1.08979	0.0290786	---	---
17841013	5.31189	4.87442	-1.08975	0.0377925	Nckap5l	NM_001271369
17761795	4.47932	4.11042	-1.08975	0.0369558	Olr423	NM_001000391
17767984	5.90708	5.42071	-1.08972	0.0197512	Myh7b	NM_001107794
17831121	4.47021	4.10228	-1.08969	0.0420313	LOC688613	NM_001134845
17651280	5.62414	5.16536	-1.08882	0.0233904	Cntd1	NM_001197217
17770806	6.51487	5.98358	-1.08879	0.0314418	Surf4	ENSRNOT00000071754
17730286	5.46183	5.01645	-1.08878	0.0357679	---	GENSCAN00000001150
17747548	6.75874	6.2082	-1.08868	0.00914395	Erich6	NM_001024300
17614203	5.36149	4.92644	-1.08831	0.0410196	Zfp428	NM_001108476
17837137	5.30012	4.87034	-1.08824	0.0354198	Sybu	XM_006226063
17657885	5.10519	4.69354	-1.0877	0.002469	Spem2	NM_001017475
17737479	6.62645	6.09239	-1.08766	0.0460289	Tnfsf10	NM_145681
17747270	4.89443	4.50031	-1.08757	0.0416772	Mgarp	NM_001109556
17626150	4.63342	4.26254	-1.08701	0.022387	Mir146b	NR_032311
17635080	6.83178	6.28688	-1.08667	0.0055504	Omp	NM_012616
17782216	4.4808	4.12429	-1.08644	0.0431931	Cpa5	NM_001002808
17865793	4.9737	4.5782	-1.08639	0.0201439	---	ENSRNOT00000085842
17764218	6.12156	5.63515	-1.08632	0.00765593	Tp53i11	NM_001107749
17756307	4.65811	4.28937	-1.08597	0.0172631	RT1-CE2	NM_001008840
17790019	4.93849	4.54795	-1.08587	0.0387941	---	---
17644218	5.67154	5.22335	-1.0858	0.0404728	---	ENSRNOT00000012794
17667774	4.96623	4.57483	-1.08555	0.0492154	Krtap11-1	XM_003751014
17793412	5.66206	5.21766	-1.08517	0.0353272	Magi1	NM_001030045
17799392	5.77066	5.32032	-1.08465	0.0437155	Trim32	NM_001012103
17735224	5.7986	5.34772	-1.08431	0.0361575	Lhfpl2	NM_001106402
17850949	3.93393	3.6285	-1.08417	0.0407117	---	ENSRNOT00000086819
17777302	6.2672	5.78364	-1.08361	0.0369119	Slc4a11	NM_001107775
17858300	4.77759	4.40977	-1.08341	0.0205949	Cfc1	ENSRNOT00000066284
17754230	5.70542	5.26815	-1.083	0.0219888	Lrrc3	NM_145679
17709248	5.32911	4.92165	-1.08279	0.0384789	Atp4b	NM_012510
17768408	6.09529	5.63101	-1.08245	0.0336517	Adig	XM_002729246
17791390	6.17476	5.70546	-1.08225	0.0164059	Hoxa7	NM_001109233
17704825	6.54997	6.05336	-1.08204	0.0081448	Pcdh20	NM_001107280
17853371	5.57773	5.15577	-1.08184	0.0136958	Iqch	NM_001106830
17812648	5.43661	5.02597	-1.0817	0.0306727	LOC102552055	XM_006225622
17689791	5.36362	4.96003	-1.08137	0.03861	---	---
17752623	6.3212	5.84582	-1.08132	0.0418003	Ddr1	NM_001166022
17609861	5.65423	5.22915	-1.08129	0.0296833	---	---
17869332	4.69093	4.33903	-1.0811	0.0386117	Fsd1	NM_001106918
17764009	7.10364	6.57093	-1.08107	0.0137928	---	---
17663881	5.61764	5.19664	-1.08101	0.00958727	Cep131	NM_001108310
17839665	4.80992	4.45061	-1.08073	0.0174205	RGD1566029	XM_006226181
17663144	5.42329	5.01853	-1.08065	0.0479687	Fdxr	NM_024153
17744450	7.33458	6.78741	-1.08062	0.0143376	---	ENSRNOT00000088791
17619331	4.40281	4.07501	-1.08044	0.0339997	Olr227	NM_001000203
17799203	5.72874	5.30282	-1.08032	0.000927862	Bspry	NM_022261
17600675	6.5839	6.09449	-1.0803	0.0159272	---	---
17610189	6.5839	6.09449	-1.0803	0.0159272	---	---
17696372	6.24423	5.78202	-1.07994	0.04716	Cobl	NM_001107236
17698369	5.00251	4.63252	-1.07987	0.0189351	---	ENSRNOT00000078887
17679097	6.54675	6.06299	-1.07979	0.0338276	Golga3	NM_001107847
17731182	6.16212	5.70695	-1.07976	0.0354746	Ntpcr	NM_001134573
17867717	6.93881	6.42627	-1.07976	0.0473187	Slc25a23	NM_001106873
17656760	6.3876	5.91578	-1.07976	0.0456588	---	ENSRNOT00000077811
17874195	6.62801	6.13902	-1.07965	0.0102583	Cldn2	NM_001106846
17640830	5.93552	5.49932	-1.07932	0.0429644	Cntf	NM_013166
17677262	5.00968	4.64199	-1.07921	0.0308858	Mmp17	NM_001105925
17758833	5.79005	5.36597	-1.07903	0.011725	Tbc1d32	XM_003753484
17768732	6.36565	5.8995	-1.07902	0.00132321	Kcnk15	NM_130813
17860533	5.77507	5.35218	-1.07901	0.0332844	LOC102549322	XR_349145
17635926	5.04627	4.6771	-1.07893	0.0439572	Olr222	NM_001000201
17600327	6.29357	5.83325	-1.07891	0.047242	---	---
17805663	5.22962	4.84726	-1.07888	0.0400553	---	ENSRNOT00000088129
17627529	6.30543	5.84642	-1.07851	0.0179503	Pde7b	NM_080894
17807890	4.72067	4.37712	-1.07849	0.0152564	---	GENSCAN00000031394
17881867	4.62608	4.29006	-1.07832	0.0400677	---	XM_001070426
17881939	7.30052	6.77054	-1.07828	0.0062124	no hit	XM_006227052
17879512	4.76298	4.4183	-1.07801	0.00572227	Fgf13	ENSRNOT00000091330
17605651	5.85909	5.43552	-1.07792	0.0049403	Osbpl2	---
17702407	5.33995	4.95575	-1.07753	0.0439158	---	GENSCAN00000058629
17759240	5.13069	4.7622	-1.07738	0.0202349	RGD1561147	OTTRNOT00000001670
17812760	6.76371	6.28007	-1.07701	0.0342215	Kif1b	ENSRNOT00000077784
17602705	5.27279	4.89606	-1.07695	0.0416581	---	---
17780265	5.29456	4.917	-1.07679	0.049062	Bdnf	NM_001270630
17876715	4.87671	4.52958	-1.07664	0.0250269	LOC103690888	XM_008758533
17875847	6.28447	5.83811	-1.07646	0.0081308	Chst7	NM_207600
17725092	7.42857	6.90215	-1.07627	0.0207358	RGD1562080	XM_006254447
17741072	5.46781	5.0816	-1.076	0.0421427	Ankrd35	XM_001063190
17763172	5.95116	5.53262	-1.07565	0.0206182	Dfnb59	XM_006224498
17704941	5.64495	5.24865	-1.07551	0.0232642	---	---
17630489	4.81522	4.47725	-1.07549	0.00146386	Tex101	XM_006228381
17601725	6.52275	6.06552	-1.07538	0.0194625	---	---
17760569	7.01929	6.52928	-1.07505	0.033786	Ralgds	NM_019250
17602749	6.55208	6.09524	-1.07495	0.041803	---	---
17754673	8.03355	7.47548	-1.07465	0.00849044	---	ENSRNOT00000085952
17693348	5.08056	4.72794	-1.07458	0.0230295	Fam47e	XM_006221696
17796078	5.29822	4.93097	-1.07448	0.0488617	---	GENSCAN00000019540
17851823	6.29139	5.85616	-1.07432	0.00665646	Cxcr5	NM_053303
17605609	5.40024	5.02667	-1.07432	0.0258644	---	---
17603105	5.98096	5.5679	-1.07419	0.022316	---	---
17815742	6.01875	5.60539	-1.07374	0.0369874	---	ENSRNOT00000080886
17728726	5.72024	5.32767	-1.07369	0.0238119	Dand5	XM_001064979
17662347	5.00769	4.66441	-1.0736	0.039276	---	---
17831083	6.00056	5.58933	-1.07358	0.0209449	Ccdc134	NM_001024355
17683261	6.33782	5.90668	-1.07299	0.00916064	Irf6	NM_001108859
17604287	6.61599	6.16904	-1.07245	0.0147084	---	---
17698319	6.23249	5.81186	-1.07237	0.0402192	---	ENSRNOT00000072888
17883576	5.95287	5.55132	-1.07233	0.0335129	---	---
17824352	5.4213	5.05579	-1.0723	0.0289831	RGD1305298	NM_001134526
17733582	6.26429	5.84348	-1.07201	0.00448974	Exosc6	---
17696256	5.93696	5.53861	-1.07192	0.047416	Pkd1l1	XM_008766676
17606611	6.58418	6.14333	-1.07176	0.0105751	---	---
17607255	6.58418	6.14333	-1.07176	0.0105751	---	---
17640010	6.34307	5.91849	-1.07174	0.0348775	Plcb3	NM_033350
17678784	6.20098	5.78701	-1.07153	0.0171833	Fam222a	NM_001109067
17825029	7.20495	6.72483	-1.07139	0.0460558	LOC102551959	XM_006240683
17744336	5.26093	4.91151	-1.07114	0.00206097	Pde8b	NM_199268
17854667	5.39342	5.0365	-1.07087	0.0431243	LOC102550510	XR_348670
17702506	5.81752	5.43355	-1.07067	0.0357883	LOC290071	BC091273
17778324	7.07748	6.61148	-1.07048	0.0214533	Defb29	NM_001037368
17788192	6.95112	6.49391	-1.07041	0.00700089	Arntl2	NM_133391
17744616	5.1933	4.85204	-1.07033	0.0220021	Tmem171	NM_001013903
17734956	6.30907	5.89596	-1.07007	0.030022	RGD1560883	XM_006223951
17842292	5.83207	5.45064	-1.06998	0.0228027	Zfp846	NM_001134585
17635654	5.15207	4.81524	-1.06995	0.0410473	RGD1562433	NM_001077678
17774919	5.41038	5.057	-1.06988	0.0133971	Fjx1	NM_001108955
17776254	5.63303	5.26591	-1.06972	0.0312462	Zscan29	XM_006224578
17764724	5.61277	5.24733	-1.06964	0.042763	Aven	NM_001107757
17865432	5.12775	4.79459	-1.06949	0.0101685	Cxcr1	NM_019310
17851421	6.10622	5.71122	-1.06916	0.0455308	Crtam	NM_001106813
17788925	5.66034	5.29542	-1.06891	0.0468675	---	ENSRNOT00000054573
17882947	5.66034	5.29542	-1.06891	0.0468675	---	ENSRNOT00000054573
17744314	5.19216	4.85881	-1.06861	0.0458149	Bhmt2	NM_001014256
17849448	6.37992	5.97038	-1.06859	0.0339547	LOC654482	NM_001039174
17671125	5.4503	5.10095	-1.06849	0.0446461	LOC498122	NM_001109058
17801990	5.65679	5.29475	-1.06838	0.037174	RGD1560436	NM_001109264
17643139	6.11408	5.72296	-1.06834	0.0147606	Vax1	NM_022636
17843707	5.69133	5.32789	-1.06821	0.0148808	---	ENSRNOT00000089208
17693071	6.48915	6.07505	-1.06816	0.0201115	---	---
17823003	5.16301	4.83378	-1.06811	0.0149457	Adam4l1	NM_001109277
17638440	6.3452	5.94177	-1.0679	0.0478272	---	---
17652032	4.72853	4.4312	-1.0671	0.0240311	Kcnh6	NM_053937
17610516	5.99928	5.62315	-1.06689	0.0363858	---	---
17697116	6.56291	6.1532	-1.06659	0.0364239	Mss51	NM_001106025
17754651	6.04114	5.66413	-1.06656	0.0310849	Bicc1	NM_001108531
17693342	5.85237	5.4877	-1.06645	0.0428952	Stbd1	NM_001013988
17750404	7.19001	6.74242	-1.06638	0.047387	Gstm7	NM_031154
17601077	7.54699	7.07826	-1.06622	0.0487547	---	---
17601411	7.54699	7.07826	-1.06622	0.0487547	---	---
17813477	5.88863	5.52293	-1.06621	0.0429313	Tmco4	NM_001034949
17880353	6.05324	5.67771	-1.06614	0.0484671	---	GENSCAN00000008986
17608045	6.64147	6.23115	-1.06585	0.0257795	---	---
17672833	5.65152	5.30415	-1.06549	0.0247821	Sh2b2	NM_053669
17640068	5.76915	5.4164	-1.06512	0.0483963	---	---
17603771	6.26655	5.8841	-1.065	0.0103955	---	---
17625708	5.85566	5.49833	-1.06499	0.0325885	Loxl4	NM_001107592
17757333	6.39392	6.00649	-1.0645	0.0133691	Ccdc167	NM_001109548
17799810	6.32581	5.943	-1.06441	0.0238403	---	---
17603111	6.28519	5.90512	-1.06436	0.0333373	---	---
17702336	5.75362	5.40781	-1.06395	0.0458007	---	ENSRNOT00000073533
17854693	6.45851	6.07088	-1.06385	0.0426558	Chst2	XM_006226524
17882635	5.53999	5.20869	-1.0636	0.0311181	---	NM_024401
17697472	6.9514	6.53628	-1.06351	0.0369751	Oxsm	NM_001100508
17644009	7.07344	6.65292	-1.06321	0.0359601	Nlrc3	XM_006220565
17690282	6.5566	6.16727	-1.06313	0.0227529	---	GENSCAN00000027501
17881821	5.46061	5.1375	-1.06289	0.0475855	---	NM_001014271
17792958	5.96814	5.61515	-1.06286	0.01376	Prokr1	NM_138977
17868552	6.9782	6.5657	-1.06283	0.0379637	Tmem37	NM_139095
17840384	5.79719	5.45685	-1.06237	0.0115253	Nell2	NM_031070
17641339	5.78174	5.44372	-1.06209	0.0186745	Cbwd1	NM_133535
17676959	6.22371	5.86146	-1.0618	0.00389883	Srrm3	NM_001277394
17705538	5.59669	5.27239	-1.06151	0.040334	LOC290071	BC091273
17810714	6.1137	5.75971	-1.06146	0.0121545	Gja4	NM_021654
17798754	6.69672	6.30932	-1.0614	0.0323867	---	GENSCAN00000015344
17670081	6.73507	6.34627	-1.06127	0.00912178	Rtp1	NM_001105870
17723786	5.03504	4.74541	-1.06103	0.0474923	Onecut2	XM_002725360
17631448	9.0365	8.51724	-1.06097	0.0312488	---	GENSCAN00000029479
17846325	5.2053	4.90879	-1.0604	0.0339526	---	ENSRNOT00000079145
17822899	7.13101	6.72504	-1.06037	0.0349161	---	---
17777482	6.49118	6.12202	-1.0603	0.0208236	LOC103691893	XM_008762243
17685434	6.73218	6.34999	-1.06019	0.0335458	Mr1	NM_001100635
17608619	6.71568	6.33554	-1.06	0.0327945	---	---
17642533	6.08939	5.74497	-1.05995	0.0119162	Psd	NM_134370
17834700	5.10813	4.81929	-1.05993	0.0487991	---	GENSCAN00000010935
17602779	6.30251	5.9462	-1.05992	0.0222368	---	---
17646019	4.86513	4.59324	-1.05919	0.036051	Gria1	NM_031608
17821260	5.52099	5.2138	-1.05892	0.0111068	---	GENSCAN00000027160
17761258	6.15293	5.81183	-1.05869	0.0394537	Prdm12	XM_001067974
17828362	5.36715	5.07019	-1.05857	0.0437805	Il22	NM_001191988
17668049	6.09205	5.75743	-1.05812	0.0331341	Hlcs	XM_001054618
17779266	6.79607	6.42299	-1.05809	0.0341753	Acot8	NM_130756
17727241	5.9486	5.62309	-1.05789	0.0360278	Setbp1	XM_006222642
17603511	5.42589	5.12992	-1.0577	0.0430015	---	---
17834736	5.99084	5.66434	-1.05764	0.040856	Eid3	NM_001044304
17604679	5.95119	5.62687	-1.05764	0.000244405	Zfp644	---
17643844	6.26193	5.92154	-1.05748	0.038938	Cdip1	NM_001008360
17600831	7.17437	6.78661	-1.05714	0.0142327	---	---
17814282	6.36298	6.01919	-1.05711	0.0252097	Slc5a6	NM_130746
17682317	6.49785	6.14711	-1.05706	0.00501766	Kmo	NM_021593
17848689	5.30856	5.02224	-1.05701	0.0400843	Mir26a	NR_031830
17703320	6.1911	5.85774	-1.05691	0.0455915	Cryl1	NM_175757
17787797	5.41176	5.12112	-1.05675	0.0373179	Gucy2c	NM_013170
17674366	7.28289	6.89202	-1.05671	0.0261225	Srrm4	XR_590801
17730899	5.13997	4.86592	-1.05632	0.0322787	Spata33	NM_001106195
17703427	4.92062	4.65841	-1.05629	0.0397442	---	ENSRNOT00000090169
17855397	5.97258	5.65516	-1.05613	0.0139924	LOC102550160	XM_006226556
17652951	7.06337	6.68804	-1.05612	0.0204957	Mettl23	NM_001008283
17880591	6.59384	6.2439	-1.05605	0.0275287	LOC100361664	XM_008772836
17803953	6.15888	5.83332	-1.05581	0.0329317	Agmat	NM_001048185
17629602	5.96018	5.64519	-1.0558	0.0316024	Brsk1	NM_001127337
17785312	5.19578	4.92183	-1.05566	0.0290368	---	---
17769283	6.33821	6.00415	-1.05564	0.0400832	Fam209a	NM_001106548
17882613	7.63875	7.23681	-1.05554	0.0267694	---	NM_013035
17602401	7.48498	7.09178	-1.05544	0.027897	---	---
17788861	6.26786	5.93886	-1.0554	0.0419586	---	---
17649130	7.50094	7.10775	-1.05532	0.0457085	---	---
17839120	6.92307	6.56066	-1.05524	0.00957569	Baiap2l2	NM_001271220
17863712	5.57759	5.28656	-1.05505	0.0124803	Prss40	NM_001108209
17613753	5.73567	5.43729	-1.05488	0.0188446	Pnmal1	NM_001108473
17622119	7.234	6.85778	-1.05486	0.0316421	B4galnt4	NM_001107562
17604687	6.08356	5.76803	-1.0547	0.0230644	---	---
17684261	6.73979	6.3906	-1.05464	0.00594618	Lax1	NM_001017491
17645131	4.49398	4.26195	-1.05444	0.0314395	---	GENSCAN00000028640
17638177	6.28921	5.96592	-1.05419	0.0465701	Syce1	NM_001025058
17827006	5.75247	5.45709	-1.05413	0.00484579	Kank3	NM_001108989
17607423	6.51285	6.17882	-1.05406	0.0384191	---	---
17673111	7.2225	6.85269	-1.05396	0.0380812	---	ENSRNOT00000062923
17673112	7.2225	6.85269	-1.05396	0.0380812	---	---
17660498	6.20091	5.88352	-1.05395	0.0384809	Tbkbp1	NM_172021
17600801	7.52417	7.13919	-1.05392	0.0358016	---	---
17710887	8.71002	8.26666	-1.05363	0.041768	Jund	NM_001286966
17703511	6.81678	6.47096	-1.05344	0.016755	Atp8a2	XM_003751492
17774623	6.88675	6.53798	-1.05335	0.0346619	Creb3l1	NM_001005562
17882207	6.56483	6.23305	-1.05323	0.0359457	---	NR_028365
17840679	6.21709	5.90425	-1.05299	0.0233623	---	---
17601659	6.33434	6.01653	-1.05282	0.0479889	---	---
17701937	6.84464	6.50229	-1.05265	0.0408414	Tep1	NM_022591
17792762	6.48919	6.16639	-1.05235	0.0198794	Rab11fip5	XM_003753914
17703365	6.4189	6.1015	-1.05202	0.0201384	Lats2	NM_001107267
17734045	6.32988	6.01795	-1.05183	0.018716	Zcchc14	XM_001079169
17876870	7.88697	7.49855	-1.0518	0.0168281	Shroom2	NM_001047893
17627742	7.27614	6.91812	-1.05175	0.0413087	Taar7e	NM_175590
17801019	6.51646	6.19669	-1.0516	0.0441589	LOC100911772	XM_006225515
17625749	6.27168	5.96411	-1.05157	0.0463289	Avpi1	NM_134373
17757052	5.92446	5.63485	-1.0514	0.0341084	Lemd2	NM_001039032
17807413	7.58073	7.21302	-1.05098	0.0406758	Ctnnal1	NM_001106649
17643741	6.09331	5.79781	-1.05097	0.04365	Nagpa	NM_001108265
17725274	6.73141	6.4075	-1.05055	0.0177297	Sft2d3	NM_001108887
17744705	6.30837	6.00484	-1.05055	0.0167772	Cartpt	NM_017110
17816099	5.81494	5.53605	-1.05038	0.0192283	---	ENSRNOT00000089568
17854403	6.23041	5.93231	-1.05025	0.0479119	Ube3d	NM_001039610
17655747	6.91912	6.58916	-1.05008	0.00711988	---	GENSCAN00000003992
17617559	6.91113	6.58321	-1.04981	0.0211561	Klhl25	NM_001039006
17760196	5.59381	5.3298	-1.04954	0.0367889	LOC681186	XM_001060674
17829495	6.39902	6.09709	-1.04952	0.0400804	Zhx2	NM_001271056
17608179	7.49761	7.14434	-1.04945	0.0461818	---	---
17768522	8.04615	7.66956	-1.0491	0.0305702	Plcg1	NM_013187
17816605	7.07771	6.74673	-1.04906	0.0136738	Prkch	NM_031085
17723928	7.43324	7.08797	-1.04871	0.0464284	Rax	NM_053678
17873797	5.13066	4.89285	-1.0486	0.0420263	Tnmd	NM_022290
17811250	7.56829	7.22062	-1.04815	0.0491421	---	---
17823604	6.0593	5.78219	-1.04792	0.0345884	---	GENSCAN00000024111
17881347	6.12391	5.84441	-1.04782	0.0478262	---	---
17846260	6.57649	6.27852	-1.04746	0.0384957	Irak1bp1	NM_001277283
17817338	6.00451	5.73286	-1.04738	0.0482786	Dnal1	NM_001109477
17674897	6.2191	5.93844	-1.04726	0.0483412	Pxmp2	NM_031587
17789285	7.20545	6.88038	-1.04725	0.0370738	---	GENSCAN00000010705
17603889	6.3584	6.07232	-1.04711	0.0409241	---	---
17735683	8.42524	8.0464	-1.04708	0.00641123	Pde4d	NM_001113328
17604437	6.27326	5.99285	-1.04679	0.0147168	---	---
17848898	6.62163	6.32592	-1.04675	0.0191459	Mobp	NM_012720
17605611	7.14047	6.82184	-1.04671	0.0407344	---	---
17780326	6.81004	6.50634	-1.04668	0.0348567	Cnpy1	XM_003749650
17607373	6.33005	6.04804	-1.04663	0.0113809	---	---
17837952	6.97773	6.66724	-1.04657	0.043102	Trappc9	ENSRNOT00000038172
17611421	5.16123	4.93223	-1.04643	0.0495686	Iyd	NM_001025000
17629549	7.70637	7.36469	-1.04639	0.042226	Zfp524	NM_001108905
17825276	8.42163	8.04909	-1.04628	0.0211451	---	GENSCAN00000007165
17719224	6.31652	6.03873	-1.046	0.0458146	---	ENSRNOT00000063068
17711881	6.34825	6.07226	-1.04545	0.0178863	Atp5hl1	ENSRNOT00000059185
17741359	9.19551	8.80272	-1.04462	0.0114388	Trim45	NM_001106453
17691138	6.59349	6.31366	-1.04432	0.0341068	Tbc1d10a	NM_001015022
17702684	6.02522	5.7697	-1.04429	0.0299579	Cdh24	XM_008768682
17750735	5.76298	5.51897	-1.04421	0.00222515	snoRNA	ENSRNOT00000080226
17755123	6.13519	5.87678	-1.04397	0.0274959	Dcbld1	XM_001058071
17823417	5.82015	5.57539	-1.0439	0.0232551	Pomt2	NM_001047114
17617835	7.52226	7.20663	-1.0438	0.0252782	---	---
17610600	6.81225	6.5313	-1.04302	0.0269172	---	---
17616427	5.2897	5.07177	-1.04297	0.0111693	Rasip1	NM_001106261
17858347	6.43494	6.17048	-1.04286	0.0204646	Arid5a	NM_001034934
17643476	8.23293	7.89641	-1.04262	0.0365612	LOC102550998	XM_006234663
17846985	6.42346	6.16312	-1.04224	0.0147558	Amotl2	NM_031717
17825764	6.73742	6.46502	-1.04213	0.0433614	Mmp19	NM_001107159
17720898	6.37511	6.11867	-1.04191	0.0429681	Fam171a1	XM_006222463
17754283	7.64164	7.33468	-1.04185	0.021114	Fam207a	NM_001008307
17710629	6.69986	6.43096	-1.04181	0.0491589	Hsh2d	NM_001271328
17816072	6.53033	6.27119	-1.04132	0.0429208	---	ENSRNOT00000078460
17816074	6.53033	6.27119	-1.04132	0.0429208	---	ENSRNOT00000078460
17795793	5.23041	5.02347	-1.0412	0.0386299	Tas2r113	NM_001166689
17746202	7.36834	7.07784	-1.04104	0.0400132	---	GENSCAN00000045714
17695991	6.92144	6.65104	-1.04066	0.036451	---	---
17656988	7.23562	6.95375	-1.04053	0.0199861	Rnf112	NM_138613
17617834	7.47292	7.18243	-1.04044	0.0471188	---	---
17822940	7.61973	7.32364	-1.04043	0.0341862	Dcaf5	NM_001100718
17710343	7.55618	7.26643	-1.03988	0.0467548	---	GENSCAN00000030970
17838414	9.10496	8.75816	-1.0396	0.00541982	no hit	---
17873704	5.91164	5.68755	-1.0394	0.0332969	H2afb3	NM_001106969
17821342	6.1176	5.8883	-1.03894	0.0199382	Colec11	XM_006225735
17628790	7.74696	7.45928	-1.03857	0.0308371	---	---
17653221	7.86065	7.56964	-1.03845	0.0427326	Chmp6	NM_001105856
17831664	5.08595	4.89954	-1.03805	0.0248796	Mapk8ip2	XM_001055248
17600547	8.93351	8.60759	-1.03786	0.0190636	---	---
17610061	8.93351	8.60759	-1.03786	0.0190636	---	---
17739843	9.02057	8.69605	-1.03732	0.0344199	Mex3a	XM_006224180
17837513	7.56834	7.30042	-1.0367	0.0460622	Tmem65	NM_001100995
17718628	8.10862	7.8253	-1.03621	0.0242408	Ninj1	NM_012867
17689947	7.86917	7.59795	-1.0357	0.0476748	Mir328b	NR_037399
17645093	7.80004	7.53224	-1.03555	0.0472033	---	ENSRNOT00000082053
17608689	6.27966	6.06412	-1.03554	0.0373269	---	---
17706633	8.01716	7.75077	-1.03437	0.0369126	LOC683605	XM_006222195
17824116	8.20623	7.93454	-1.03424	0.0052333	Snorna	ENSRNOT00000085740
17643720	5.89935	5.71125	-1.03293	0.0448151	Eef2kmt	NM_001106975
17610011	8.60688	8.33911	-1.03211	0.00433501	Ccz1b	---
17870833	6.1644	5.97269	-1.0321	0.0434369	---	GENSCAN00000041529
17683018	7.0118	6.79437	-1.032	0.019005	Gpatch2	NM_001011909
17875788	8.89838	8.62789	-1.03135	0.0319932	---	---
17600865	7.58463	7.35515	-1.0312	0.0365536	---	---
17825097	10.8769	10.5558	-1.03041	0.0430996	---	ENSRNOT00000078672
17792566	8.10397	7.87018	-1.02971	0.0430166	---	---
17870184	6.8365	6.6502	-1.02801	0.0324451	---	NONRATT028202
17636300	9.22959	8.98241	-1.02752	0.0424636	---	---
17875826	8.43709	8.21189	-1.02742	0.0347477	Jade3	NM_001271265
17602351	6.81309	6.63742	-1.02647	0.0358331	---	---
17697660	10.1898	9.94925	-1.02418	0.0493094	Dnase1l3	NM_053907
17784234	8.84675	8.64936	-1.02282	0.025	---	ENSRNOT00000086526
17802626	6.13779	6.00959	-1.02133	0.0422764	---	---
17663860	6.75466	6.63366	-1.01824	0.0416465	Polr2h-ps1	XR_594959
17601041	9.30636	9.43892	1.01424	0.0479155	---	---
17601375	9.30636	9.43892	1.01424	0.0479155	---	---
17611410	7.38664	7.6389	1.03415	0.0277602	---	XM_008758139
17878716	6.43425	6.68773	1.03939	0.0125895	---	ENSRNOT00000050903
17773120	6.82474	7.11501	1.04253	0.0337334	---	---
17689793	7.25212	7.57961	1.04516	0.0190738	---	ENSRNOT00000078801
17793470	6.02845	6.30643	1.04611	0.0420531	Fam19a4	NM_001134700
17834129	5.4898	5.75963	1.04915	0.0199142	---	ENSRNOT00000063488
17600357	5.4983	5.78439	1.05203	0.040692	---	---
17774882	5.94768	6.25763	1.05211	0.0360846	RGD1309730	NM_001106491
17737836	4.75966	5.0121	1.05304	0.0440059	---	ENSRNOT00000062193
17702384	5.38378	5.67227	1.05358	0.034294	---	GENSCAN00000058635
17624595	5.94022	6.26802	1.05518	0.0384768	---	ENSRNOT00000049732
17724729	4.82552	5.0953	1.05591	0.00983195	Cetn1	NM_053461
17717017	6.94549	7.33549	1.05615	0.0114456	---	GENSCAN00000007255
17668044	4.40049	4.65123	1.05698	0.0259029	Cldn14	NM_001013429
17880483	4.9609	5.24658	1.05759	0.0461216	---	GENSCAN00000046877
17705618	5.4841	5.80339	1.05822	0.00908775	Farp1	NM_001107287
17723304	5.38976	5.70536	1.05855	0.032366	---	---
17791413	6.60613	6.9958	1.05899	0.0217636	---	ENSRNOT00000035078
17754847	4.83693	5.12288	1.05912	0.0288117	Pbld1	NM_138530
17815821	5.76817	6.11102	1.05944	0.0155728	Nubpl	NM_001185025
17712710	5.26722	5.58581	1.06049	0.0423886	---	NM_001033074
17604935	4.43793	4.7088	1.06104	0.0337023	---	---
17878870	6.64972	7.05665	1.06119	0.0314201	Zmat1	XM_002727625
17874767	4.09298	4.34355	1.06122	0.0440365	MGC114427	NM_001024893
17817028	5.61316	5.96491	1.06267	0.00878979	---	---
17705562	5.13204	5.45431	1.0628	0.0369659	LOC100359766	ENSRNOT00000060380
17703506	6.00712	6.38796	1.0634	0.0142548	---	---
17810558	4.44686	4.73442	1.06467	0.0432604	Tekt2	NM_001011977
17766506	4.61438	4.91597	1.06536	0.0454802	---	ENSRNOT00000085976
17737635	4.84152	5.16158	1.06611	0.00264873	Lrrc31	XM_006224099
17690531	5.34931	5.70526	1.06654	0.0293761	---	ENSRNOT00000069124
17799004	7.11543	7.59226	1.06701	0.0250446	---	---
17818685	5.2434	5.5996	1.06793	0.0465772	Mir300	NR_031944
17615469	4.53297	4.84205	1.06818	0.0439901	Lgi4	NM_199499
17612259	4.77298	5.10088	1.0687	0.0193246	Smoc2	NM_001106215
17609779	5.11397	5.46591	1.06882	0.041588	---	---
17676321	4.52095	4.83347	1.06913	0.0490153	Cyp2w1	XM_006221282
17604295	5.45222	5.83176	1.06961	0.0105215	---	---
17607559	4.5731	4.89275	1.0699	0.014319	---	---
17608977	4.5731	4.89275	1.0699	0.014319	---	---
17682486	4.87767	5.22324	1.07085	0.037085	---	---
17604409	5.71177	6.12115	1.07167	0.0444767	---	---
17847353	4.86267	5.21324	1.07209	0.049155	---	---
17807281	4.49705	4.82237	1.07234	0.0444804	---	ENSRNOT00000082381
17749670	5.2682	5.65245	1.07294	0.0337822	Cd160	XM_008761347
17873891	5.26792	5.65271	1.07304	0.0358683	Rpl36a	NM_001128065
17609597	5.44101	5.84339	1.07395	0.023123	---	---
17608579	5.46709	5.87553	1.07471	0.0411531	---	---
17785395	4.81532	5.17733	1.07518	0.0326187	Vom1r100	NM_173296
17826674	4.83816	5.20293	1.0754	0.00271339	Vom2r53	ENSRNOT00000010203
17881105	5.17768	5.56836	1.07546	0.00675339	---	---
17861009	4.75421	5.11498	1.07588	0.0393709	---	---
17619421	5.02126	5.40234	1.07589	0.0140321	Olr264	NM_001000999
17882003	4.71615	5.07412	1.0759	0.0288728	---	NM_031806
17797166	5.37233	5.78066	1.07601	0.0383612	---	GENSCAN00000019664
17733466	4.31498	4.64333	1.0761	0.0433733	Calb2	NM_053988
17763041	5.4137	5.82573	1.07611	0.0162778	---	---
17711609	4.59258	4.94212	1.07611	0.0170584	---	ENSRNOT00000078334
17883045	4.61249	4.96508	1.07644	0.000636105	LOC108348293	XM_006227087
17724160	4.54072	4.88858	1.07661	0.00800475	---	GENSCAN00000034789
17825907	4.76324	5.1301	1.07702	0.0314979	Olr1012	NM_001000071
17844555	4.4925	4.84717	1.07895	0.0426442	Cyp1a1	NM_012540
17723511	5.59531	6.03778	1.07908	0.0251939	Chsy3	XM_003753051
17729378	4.79429	5.17592	1.0796	0.0478312	Slc9a5	NM_138858
17626797	4.26128	4.60087	1.07969	0.029053	LOC103691386	XR_590755
17851407	5.00892	5.41029	1.08013	0.0126158	---	---
17602605	4.77142	5.15923	1.08128	0.0426604	---	---
17684462	5.9083	6.38992	1.08152	0.0238995	---	ENSRNOT00000069877
17843424	5.47267	5.91918	1.08159	0.00261628	Zfp202	NM_001109290
17848541	5.1127	5.53585	1.08276	0.0249341	Osbpl10	XM_006244025
17850594	4.65466	5.04451	1.08376	0.0052329	Dpy19l2	XM_002727030
17603153	5.08593	5.51565	1.08449	0.0134064	---	---
17661238	4.50409	4.88727	1.08507	0.0156346	Krt15	NM_001004022
17698231	4.99112	5.41666	1.08526	0.0183572	Olr1643	NM_001000535
17850647	4.81108	5.22431	1.08589	0.0368239	Glb1l2	NM_001192018
17883039	4.56972	4.9629	1.08604	0.00403296	---	XM_006227142
17619204	4.45385	4.83774	1.08619	0.0240651	Olr186	NM_001001031
17643467	4.70009	5.10692	1.08656	0.0232257	A630010A05Rik	ENSRNOT00000072296
17653538	4.70009	5.10692	1.08656	0.0232257	A630010A05Rik	ENSRNOT00000072296
17833208	5.32482	5.79122	1.08759	0.0453741	---	GENSCAN00000053914
17808540	5.50537	5.98767	1.0876	0.0118634	LOC100912356	XM_003749975
17605151	4.50192	4.89778	1.08793	0.0222119	---	---
17620309	4.35605	4.7397	1.08807	0.0332942	Hs3st2	NM_181370
17864415	4.15239	4.51854	1.08818	0.049845	Tmeff2	NM_001108795
17829929	5.54382	6.0336	1.08835	0.0381356	Psca	NM_001172106
17869149	4.44877	4.84513	1.08909	0.0108935	LOC316124	NM_001134566
17632151	4.04121	4.40224	1.08934	0.0335747	Zfp536	XM_008759267
17818103	5.30411	5.77973	1.08967	0.0118015	Ppp4r4	NM_001134632
17609261	5.82603	6.34966	1.08988	0.0216142	---	---
17691076	4.49459	4.89896	1.08997	0.0055444	Sec14l4	NM_001109090
17772949	4.67929	5.10196	1.09033	0.0139782	Scn7a	NM_031686
17612164	4.44972	4.85345	1.09073	0.0164705	Vom2r9	NM_001099465
17608295	4.40442	4.80477	1.0909	0.0350413	---	---
17654238	4.54265	4.95857	1.09156	0.0135908	---	NM_001108823
17688861	5.9058	6.44933	1.09203	0.00273115	no hit	---
17659421	4.46895	4.88447	1.09298	0.0292901	Ac1576	NM_001287624
17735559	4.83415	5.28817	1.09392	0.0466553	Adamts6	XM_008760707
17721729	3.32555	3.63998	1.09455	0.0473142	---	GENSCAN00000055218
17864846	4.14702	4.53996	1.09475	0.0457677	Als2cr11	NM_001024363
17606057	4.76423	5.21783	1.09521	0.0274737	---	---
17792360	4.47473	4.90168	1.09541	0.04913	Dnah6	XM_008763013
17871021	4.658	5.10849	1.09671	0.0412163	---	---
17872956	4.39193	4.82038	1.09755	0.0249992	---	ENSRNOT00000076465
17680446	4.06355	4.46104	1.09782	0.0267605	Tnnt2	NM_012676
17715197	4.16506	4.57249	1.09782	0.0133378	Cage1	NM_001012052
17688647	4.46388	4.90108	1.09794	0.0347455	Ccdc158	XM_006221687
17631210	5.28019	5.79836	1.09814	0.0475948	Ryr1	XM_008759293
17619798	4.374	4.80456	1.09844	0.00306691	Insc	NM_001106285
17878568	4.83634	5.31252	1.09846	0.00353572	Sh3bgrl3	XM_008758487
17874901	4.23818	4.65721	1.09887	0.0361316	Gpr50	NM_001191915
17652829	4.54192	4.99291	1.09929	0.0336965	LOC102552551	XM_006220906
17876984	4.60713	5.07401	1.10134	0.0433215	Asb9	NM_001191913
17883057	4.27085	4.70399	1.10142	4.98737e-05	Dlg5-ps1	XM_006227142
17883065	4.27085	4.70399	1.10142	4.98737e-05	Dlg5-ps1	XM_006227142
17823486	4.41963	4.87023	1.10196	0.020912	---	---
17880642	4.25937	4.69506	1.10229	0.0293822	Ccdc141	XM_003749494
17612972	4.61025	5.08309	1.10256	0.0153172	---	ENSRNOT00000053809
17629648	4.61025	5.08309	1.10256	0.0153172	---	ENSRNOT00000053809
17618226	4.02798	4.44242	1.10289	0.0143209	Ccdc89	NM_001134833
17856610	4.34298	4.7958	1.10426	0.0393517	Lyzl4	NM_001246183
17701156	4.42541	4.89239	1.10552	0.0134945	---	---
17880285	4.42871	4.89699	1.10574	0.0203064	LOC690138	XR_592743
17720057	4.87958	5.39895	1.10644	0.0457181	LOC100362965	XM_002725291
17831126	5.12709	5.6731	1.10649	0.000806725	Septin3	NM_019375
17660026	3.85048	4.26286	1.1071	0.038885	LOC303448	NM_001037190
17621531	4.21653	4.67007	1.10756	0.00560578	Dmbt1	XM_008759948
17843197	4.98191	5.51872	1.10775	0.0449301	Vsig2	NM_001106812
17733972	4.48019	4.96698	1.10865	0.0389637	Kcng4	NM_001107435
17620691	4.52158	5.01358	1.10881	0.0379651	Tbx6	NM_001108920
17650535	4.13327	4.58405	1.10906	0.0171893	Hoxb4	NM_001100787
17703439	5.00396	5.5532	1.10976	0.00132413	snRNA	ENSRNOT00000084279
17863364	4.23193	4.69764	1.11005	0.0321279	LOC102549795	XR_348952
17764822	4.55307	5.05533	1.11031	0.00671459	---	---
17699267	5.52317	6.1335	1.1105	0.0099932	---	---
17843239	3.48442	3.86986	1.11062	0.0365936	Olr1206	NM_001000816
17808964	2.53202	2.81409	1.1114	0.0357525	---	---
17607393	6.26647	6.96784	1.11193	0.027554	---	---
17659949	3.91323	4.35132	1.11195	0.0449728	LOC102551403	XM_006220779
17864191	4.17981	4.64959	1.11239	0.0498013	---	ENSRNOT00000079117
17760106	4.58819	5.10719	1.11312	0.00520659	Kcnt1	NM_021853
17741393	4.51213	5.02388	1.11342	0.0161058	Casq2	NM_017131
17863213	4.09046	4.55714	1.11409	0.00950796	Crisp4	NM_001039393
17791862	3.38913	3.77628	1.11423	0.0194302	---	ENSRNOT00000011067
17682108	4.16153	4.63793	1.11448	0.0197759	Kcnj10	NM_031602
17676538	4.01501	4.47574	1.11475	0.0176574	Mir25	NR_031829
17868049	4.08778	4.55769	1.11496	0.027379	---	---
17883127	4.08979	4.56379	1.1159	0.0436245	---	HOTAIRM1
17608177	4.20723	4.69539	1.11603	0.0105545	---	---
17880497	4.42787	4.94402	1.11657	0.0218173	---	---
17768697	3.9261	4.38502	1.11689	0.0455748	Hnf4a	NM_001270931
17679724	4.34365	4.8542	1.11754	0.00740937	Gpr39	NM_001100943
17670681	4.1295	4.616	1.11781	0.0325521	Tssk2	NM_001012019
17782183	4.51103	5.04347	1.11803	0.0393051	Ssmem1	NM_001109228
17829038	3.7304	4.17172	1.1183	0.0208206	Odf1	NM_024126
17810722	4.536	5.07607	1.11906	0.0151751	Gjb5	NM_019241
17677771	4.82959	5.40839	1.11985	0.0285092	Lrrc43	NM_001170396
17702281	3.98989	4.47051	1.12046	0.0143062	---	GENSCAN00000019563
17810051	3.92264	4.40233	1.12229	0.015721	LOC679803	XM_006225522
17737211	3.99471	4.48543	1.12284	0.0332121	Fabp9	NM_022854
17657284	4.33882	4.87295	1.1231	0.0152016	Dnah9	XM_002724507
17882663	4.16681	4.68072	1.12333	0.0376255	---	NM_013120
17817627	3.33169	3.74272	1.12337	0.0185238	Lrrc74a	NM_001037783
17690266	3.58002	4.02399	1.12401	0.0451164	---	ENSRNOT00000078406
17614456	4.76108	5.35309	1.12434	0.00625046	B3gnt8	NM_001107492
17626033	4.80009	5.39905	1.12478	0.000686214	Hps6	NM_181432
17601743	4.25548	4.78717	1.12494	0.00904252	---	---
17831219	3.55311	3.99826	1.12528	0.0421044	Mpped1	NM_001130569
17728312	4.08294	4.59502	1.12542	0.0188239	Sall1	NM_001107415
17608095	4.67209	5.25983	1.1258	0.0253927	---	---
17662644	4.62215	5.20522	1.12615	0.00594535	Cacng1	NM_019255
17683379	3.6228	4.0801	1.12623	0.0113377	---	GENSCAN00000028171
17796054	3.92708	4.42427	1.12661	0.00542665	Rergl	NM_001191979
17695781	3.81504	4.30043	1.12723	0.0354242	Osbp2	NM_001107232
17773008	4.10422	4.62725	1.12744	0.0265118	Lrp2	NM_030827
17880802	3.67352	4.1424	1.12764	0.0172856	---	---
17667474	4.74055	5.34983	1.12852	0.0313965	---	---
17603841	4.52966	5.11453	1.12912	0.0456077	---	---
17707014	4.45177	5.02972	1.12982	0.0377212	Kcnn1	NM_019313
17706463	4.13314	4.67198	1.13037	0.0152622	LOC681303	XM_006252713
17725255	3.96388	4.48486	1.13143	0.0173203	---	GENSCAN00000055442
17653713	4.02461	4.55404	1.13155	0.0250407	Atf7ip2	NM_001017471
17606455	3.71543	4.20472	1.13169	0.0416249	---	---
17709291	4.21758	4.78243	1.13393	0.0120783	Adprhl1	XM_006253439
17760219	3.27104	3.71266	1.13501	0.0167722	LOC102547882	XM_008761630
17601145	5.06021	5.74347	1.13503	0.0302903	---	---
17601479	5.06021	5.74347	1.13503	0.0302903	---	---
17642925	4.4172	5.01652	1.13568	0.0376345	Gucy2g	NM_139042
17867031	4.20079	4.77117	1.13578	0.0483638	Mtcl1	XM_002727262
17878615	3.74365	4.25401	1.13633	0.0384479	Satl1	NM_001163543
17820101	3.17306	3.60569	1.13635	0.0464177	---	ENSRNOT00000089684
17699761	3.95752	4.49967	1.13699	0.0417138	---	GENSCAN00000055459
17808857	4.68331	5.32713	1.13747	0.0301814	---	---
17875942	3.76142	4.28081	1.13808	0.0291053	---	GENSCAN00000045608
17665898	4.01202	4.56861	1.13873	0.0229643	Nr1i2	NM_052980
17640803	4.00667	4.5631	1.13888	0.0371811	Olr325	NM_001000247
17610855	4.22819	4.81693	1.13924	0.0131123	---	ENSRNOT00000087422
17880646	3.68944	4.20733	1.14037	0.00986025	Olfr1055	XM_002729195
17696519	4.01501	4.57916	1.14051	0.0284966	LOC689821	ENSRNOT00000067365
17711471	3.91393	4.46469	1.14072	0.0293641	Aadat	NM_017193
17867541	4.71531	5.38188	1.14136	0.0423914	Vom2r76	NM_001099505
17876868	5.36595	6.12924	1.14225	0.0266168	---	---
17797445	4.12636	4.71752	1.14326	0.0431349	Cngb3	NM_001271238
17656531	4.7576	5.44664	1.14483	0.00119471	Obscn	XM_008767886
17791722	3.89543	4.46137	1.14528	0.0423579	---	---
17737657	3.80471	4.35811	1.14545	0.0314694	Actrt3	NM_001108942
17742929	3.35022	3.83792	1.14557	0.0296917	---	GENSCAN00000019329
17766357	2.65489	3.04142	1.14559	0.0365197	---	ENSRNOT00000079927
17658496	3.31761	3.80366	1.14651	0.0326415	Olr1496	NM_001000716
17801876	3.43464	3.94064	1.14732	0.013404	LOC102547626	XM_008764119
17714318	4.09536	4.70073	1.14782	0.0413209	---	ENSRNOT00000085755
17601617	4.6366	5.32351	1.14815	0.0165078	---	---
17640302	5.28285	6.06705	1.14844	0.0104332	Gng3	NM_053658
17757282	3.38378	3.88608	1.14844	0.0496774	---	ENSRNOT00000089280
17609259	3.83404	4.40381	1.14861	0.0268719	---	---
17761755	3.60498	4.14222	1.14902	0.0150886	Olr396	NM_001000831
17700732	3.55291	4.08331	1.14928	0.0317221	---	GENSCAN00000010065
17699096	3.84089	4.41657	1.14988	0.0116883	---	---
17767250	3.44731	3.96463	1.15006	0.0361248	---	GENSCAN00000040644
17655264	4.56787	5.25469	1.15036	0.00795553	Ranbp17	NM_001106994
17763579	4.14897	4.77364	1.15056	0.0278545	Olr454	NM_001000290
17708635	4.17431	4.80741	1.15167	0.0357104	---	ENSRNOT00000086906
17872953	4.06642	4.68892	1.15308	0.000171375	processed pseudo	ENSRNOT00000036763
17882547	3.91529	4.51474	1.15311	0.01027	---	XM_008758166
17605731	5.0982	5.88155	1.15365	0.00711003	---	---
17785017	2.97549	3.43398	1.15409	0.0204984	---	---
17872783	3.72	4.29438	1.1544	0.0118589	LOC100364596	ENSRNOT00000039568
17668828	5.32435	6.14648	1.15441	0.0456222	---	---
17692372	3.5777	4.13031	1.15446	0.032723	---	ENSRNOT00000039993
17607967	4.75883	5.49476	1.15464	0.0494603	---	---
17812310	3.03327	3.50263	1.15474	0.0357295	RGD1559644	XM_001074380
17601103	3.69232	4.26939	1.15629	0.00802781	---	---
17601437	3.69232	4.26939	1.15629	0.00802781	---	---
17740447	3.89765	4.50962	1.15701	0.0258623	RGD1562234	NM_001109187
17881179	3.75119	4.34213	1.15753	0.0451109	---	RPTR-AE009032-1
17606283	3.41935	3.96266	1.15889	0.0318931	---	---
17774333	4.18706	4.85263	1.15896	0.0157588	Olr696	NM_001001063
17642081	3.96104	4.59337	1.15964	0.030196	Opalin	NM_001017386
17866370	3.36645	3.91091	1.16173	0.0090784	---	---
17612377	3.13167	3.6411	1.16267	0.0487067	---	---
17834089	3.54129	4.12233	1.16407	0.0346515	Olr1081	NM_001000592
17879340	3.36461	3.91892	1.16475	0.0431958	Mir19b2	NR_031821
17850955	3.04833	3.55141	1.16503	0.0213438	---	ENSRNOT00000078025
17710348	3.78837	4.41706	1.16595	0.0214417	---	NM_001134849
17843365	3.81605	4.45986	1.16871	0.0189397	Olr1271	NM_173300
17633299	3.34368	3.91368	1.17047	0.0367251	Mrgprx2l	NM_001002285
17602185	3.91005	4.58227	1.17192	0.0418634	---	---
17749217	3.26216	3.82348	1.17207	0.0340844	---	ENSRNOT00000079076
17608727	4.32376	5.07829	1.17451	0.00818278	---	---
17851313	3.56163	4.18633	1.1754	0.0418953	Olr1303	NM_001000796
17856878	3.95893	4.65968	1.177	0.0181154	Slc5a7	NM_053521
17871530	4.02536	4.74982	1.17997	0.035661	Gucy2f	NM_053831
17763036	4.51546	5.33219	1.18087	0.0376775	---	GENSCAN00000049529
17872079	3.65564	4.31707	1.18093	0.0133868	---	ENSRNOT00000088318
17879617	3.44291	4.06736	1.18137	0.0446496	Mir743a	NR_032293
17754836	3.52973	4.17331	1.18233	0.0162659	Pbld2	XM_002728946
17748264	4.23681	5.01135	1.18281	0.0297132	Rbm46	NM_001135717
17826700	3.55276	4.20823	1.18449	0.00594766	Ccdc105	NM_001025774
17667230	4.02987	4.7768	1.18535	0.0267588	Ccdc116	NM_001024740
17872106	3.76468	4.46257	1.18538	0.0235494	Egfl6	NM_001108254
17682285	2.94744	3.49419	1.1855	0.0458212	Olr1602	NM_001000909
17677767	3.2752	3.88462	1.18607	0.0160503	---	ENSRNOT00000077668
17741423	2.53713	3.01209	1.1872	0.0108398	---	ENSRNOT00000087315
17862462	3.48856	4.14488	1.18814	0.0493251	---	ENSRNOT00000092033
17789272	3.43384	4.08277	1.18898	0.0273398	RGD1564345	NM_001077681
17826243	4.82	5.73233	1.18928	0.0350538	---	---
17763568	3.45562	4.11737	1.1915	0.039686	Olr445	NM_001001049
17808186	3.42827	4.08873	1.19265	0.0161308	---	ENSRNOT00000085105
17787463	3.3232	3.96375	1.19275	0.00106122	misc RNA	NONRATT042292
17771669	3.13106	3.73495	1.19287	0.0459622	LOC502618	NM_001037366
17872759	2.92515	3.49244	1.19393	0.0323756	Smek3	XM_006227387
17726532	3.55171	4.24299	1.19463	0.0148934	Mir378	NR_032139
17675002	3.54842	4.24381	1.19597	0.033151	Vom2r58	NM_001099479
17835369	2.93	3.50723	1.19701	0.0317205	---	ENSRNOT00000083789
17811998	3.79892	4.55046	1.19783	0.0162021	Clcnka	NM_053327
17871172	3.74062	4.48072	1.19785	0.00967145	Eras	NM_001109375
17668365	2.94295	3.53465	1.20106	0.0113733	---	GENSCAN00000038824
17605379	3.59499	4.32129	1.20203	0.0412837	---	---
17627756	2.79398	3.36192	1.20327	0.0263434	Taar2	NM_001008512
17806010	2.94131	3.54209	1.20426	0.0296639	---	ENSRNOT00000070117
17600627	3.49752	4.21326	1.20464	0.0264314	---	---
17610141	3.49752	4.21326	1.20464	0.0264314	---	---
17669344	2.72873	3.29149	1.20623	0.0156387	---	ENSRNOT00000090043
17632012	3.42177	4.12817	1.20644	0.0251518	Lrp3	NM_053541
17601643	5.02731	6.09125	1.21163	0.0297161	---	---
17735918	3.00977	3.6486	1.21225	0.017331	---	ENSRNOT00000069349
17607075	3.48561	4.22752	1.21285	0.00311067	Slc4a8	---
17874554	3.52611	4.2828	1.2146	0.0445853	LOC100363769	XM_006227396
17640851	3.10091	3.76705	1.21482	0.0199682	Olr343	NM_001000254
17615534	2.53121	3.07734	1.21576	0.0176496	---	ENSRNOT00000084890
17760437	3.67061	4.46643	1.21681	0.0364274	Dbh	NM_013158
17763749	3.16114	3.84896	1.21759	0.0199522	---	ENSRNOT00000064006
17875518	2.67748	3.27147	1.22185	0.0330123	---	ENSRNOT00000087693
17679279	3.82334	4.67503	1.22276	0.00890286	---	---
17825916	3.3419	4.09304	1.22476	0.00821008	---	NM_001001365
17738332	3.44054	4.22372	1.22763	0.00190797	Tagap	---
17781965	2.57849	3.16639	1.228	0.0123377	---	ENSRNOT00000091563
17743909	3.15814	3.88055	1.22874	0.0201102	---	ENSRNOT00000085820
17739110	3.51314	4.31744	1.22894	0.0207974	---	GENSCAN00000052555
17624349	3.07456	3.77975	1.22936	0.0323527	---	ENSRNOT00000089664
17680719	2.93984	3.61995	1.23134	0.0282177	---	ENSRNOT00000082431
17774120	3.5577	4.39221	1.23456	0.0264062	Olr482	NM_001000561
17741853	2.76618	3.4214	1.23686	0.0200798	---	ENSRNOT00000080814
17705654	3.11805	3.86291	1.23889	0.0495267	LOC102553140	XM_006222080
17662880	3.59849	4.45923	1.23919	0.0476067	Abca6	XM_001081607
17664542	3.00775	3.73113	1.2405	0.0224358	---	---
17607581	3.32376	4.12432	1.24086	0.0397712	---	---
17608999	3.32376	4.12432	1.24086	0.0397712	---	---
17679275	2.7063	3.37458	1.24694	0.0117788	---	ENSRNOT00000090135
17716541	3.9525	4.93829	1.24941	0.0446009	---	ENSRNOT00000089039
17787645	2.72422	3.41079	1.25202	0.0416424	Tas2r120	NM_001080937
17717763	2.91744	3.66236	1.25533	0.0260536	Spata31a5	NM_001008359
17763760	3.37487	4.24844	1.25885	0.0189525	Olr725	NM_001000514
17784629	2.249	2.83645	1.26121	0.0292765	---	ENSRNOT00000089096
17607365	2.99235	3.79345	1.26772	0.0469271	---	---
17882597	2.9718	3.78076	1.27221	0.0381062	---	---
17881739	2.59473	3.30123	1.27228	0.00838393	---	---
17737823	2.53112	3.22827	1.27543	0.0233447	---	ENSRNOT00000081740
17604805	3.52889	4.50879	1.27768	0.0380203	---	---
17622593	3.46874	4.4325	1.27784	0.0266377	Shank2	NM_001004133
17697477	2.44343	3.12721	1.27984	0.0123111	---	---
17608539	2.92556	3.74997	1.28179	0.0170064	---	---
17656089	3.04853	3.90896	1.28225	0.0415881	---	---
17611075	2.03114	2.60459	1.28233	0.00859703	---	---
17823484	2.66771	3.43767	1.28862	0.0488991	---	ENSRNOT00000054609
17882993	2.66771	3.43767	1.28862	0.0488991	---	ENSRNOT00000054609
17877983	2.5111	3.24042	1.29044	0.0106134	---	GENSCAN00000020325
17792083	2.44916	3.17118	1.2948	0.0106955	---	GENSCAN00000052033
17695584	2.95997	3.83796	1.29662	0.044472	Nkx1-1	XM_001065657
17791990	5.54765	7.23436	1.30404	0.0302203	---	ENSRNOT00000078895
17715365	2.71822	3.56475	1.31143	0.0345701	Serpinb6e	XM_001066281
17777892	2.79079	3.6617	1.31206	0.0121002	---	ENSRNOT00000036834
17608595	4.36926	5.73867	1.31342	0.0468531	---	---
17881625	2.63684	3.46665	1.3147	0.0223834	---	GENSCAN00000055543
17881749	2.63684	3.46665	1.3147	0.0223834	---	GENSCAN00000055543
17786457	3.16989	4.17652	1.31756	0.0293293	---	ENSRNOT00000083862
17794121	2.92479	3.86286	1.32073	0.00796402	Eno1	XR_346076
17666607	2.00582	2.66603	1.32915	0.0488269	---	ENSRNOT00000079289
17784261	2.10215	2.79732	1.3307	0.0260956	---	ENSRNOT00000090117
17839704	2.81639	3.75547	1.33343	0.00682122	Mir1249	NR_037390
17764621	2.81856	3.76675	1.33641	0.000457983	Olr757	NM_001000613
17742235	3.32644	4.44999	1.33776	0.0147207	Plppr5	NM_001107720
17745315	2.46753	3.31631	1.34398	0.0309546	---	GENSCAN00000038580
17626334	2.69772	3.64306	1.35042	0.0474238	---	ENSRNOT00000080375
17656473	2.26776	3.06993	1.35373	0.0267577	Olr1422	NM_001000007
17672685	3.25138	4.426	1.36127	0.00118954	no hit	---
17876562	3.03936	4.15262	1.36628	0.0022035	misc RNA	---
17872279	2.05488	2.81582	1.37031	0.0214593	---	ENSRNOT00000088031
17874448	2.58755	3.5608	1.37613	0.0191348	LOC317588	XR_147211
17814597	1.93842	2.66932	1.37706	0.0318153	---	ENSRNOT00000069652
17763636	2.65966	3.677	1.38251	0.0229598	---	ENSRNOT00000078527
17677988	3.40904	4.71414	1.38283	0.0131834	---	---
17671409	2.38038	3.29213	1.38303	0.0169204	---	---
17778058	1.65826	2.32	1.39906	0.035513	---	---
17863552	2.7994	3.92224	1.4011	0.0173903	Adgrb3	NM_001106898
17842256	2.87724	4.03825	1.40352	0.027116	Olr1165	NM_001000868
17880100	2.73007	3.84471	1.40828	0.0392883	LOC690348	XM_001074179
17600567	1.76179	2.49142	1.41415	0.0277425	---	---
17610081	1.76179	2.49142	1.41415	0.0277425	---	---
17714890	1.60044	2.26473	1.41507	0.037655	Mirlet7f-1	NR_031806
17763192	1.65255	2.35304	1.42388	0.0153578	---	---
17833196	2.21437	3.15385	1.42427	0.0296547	---	NM_001001367
17778060	2.06704	2.98923	1.44614	0.000364447	Cystatin S like	XM_003753802
17843245	2.07279	3.00804	1.4512	0.0314296	---	---
17779182	1.47927	2.1535	1.45579	0.0155099	Slpil3	NM_001008873
17877899	2.69523	3.92779	1.45731	0.00304792	Asb12	NM_001037367
17814060	2.15544	3.16063	1.46635	0.0306879	---	GENSCAN00000041783
17737220	3.36715	4.98887	1.48163	0.0322456	---	ENSRNOT00000077558
17798910	1.71561	2.54303	1.48229	0.0167897	LOC500460	XM_003749941
17800014	2.16567	3.28769	1.51809	0.0354115	---	---
17806396	2.40329	3.68091	1.53161	0.0153633	Mir873	NR_032297
17606285	2.26543	3.47325	1.53315	0.0222137	---	---
17628290	1.63333	2.5055	1.53398	0.0172407	LOC103690975	XM_008758743
17697318	1.65904	2.61393	1.57557	0.0266733	---	ENSRNOT00000049746
17605321	2.1822	3.50716	1.60717	0.0438468	---	---
17752298	1.56117	2.54467	1.62998	0.0488841	Olr1710	NM_001000886
17806163	1.55398	2.54139	1.63541	0.0345381	---	ENSRNOT00000090806
17786036	1.88745	3.12422	1.65526	0.0113574	---	ENSRNOT00000077907
17704830	1.1965	1.98805	1.66156	0.0347129	---	---
17640071	1.80282	3.08616	1.71184	0.041708	---	---
17833212	1.49347	2.56694	1.71877	0.0299622	Olr962	NM_001000487
17638072	1.16272	2.00288	1.72258	0.0173437	Mir202	NR_032736
17612416	1.64937	2.87721	1.74443	0.0312146	Vom1r3	NM_001009517
17858087	1.06433	1.91398	1.79831	0.00677132	---	ENSRNOT00000090443
17784332	1.40473	2.63524	1.87598	0.00631085	---	---
17658498	1.74176	3.26817	1.87636	0.0395693	Olr1498	NM_001000030
17711284	1.48425	2.85082	1.92071	0.0064553	rRNA	ENSRNOT00000070760
17861793	1.61502	3.11271	1.92735	0.00778219	---	ENSRNOT00000085771
17778040	1.5946	3.16161	1.98269	0.0396032	---	GENSCAN00000028817
17872998	0.985847	2.11444	2.14479	0.0221399	Mir3573	NR_037364
17689442	1.27554	2.7467	2.15337	0.0462575	LOC100363494	XM_002728110
17865102	1.16733	2.55499	2.18874	0.0251869	Crygb	NM_001109875
17664440	1.47866	3.32879	2.25122	0.00454696	---	---
17665185	0.944845	2.13984	2.26476	0.000518033	snoRNA	ENSRNOT00000089069
17880186	0.963152	2.25248	2.33866	0.0336213	Olr1471	NM_001000722
17880691	0.963152	2.25248	2.33866	0.0336213	---	NM_001000722
17602075	1.04127	2.47225	2.37427	0.0447208	---	---
17878702	0.477408	1.14045	2.38883	0.0208341	---	ENSRNOT00000090969
17832385	1.57921	3.7917	2.40102	0.0399092	---	---
17822173	0.428272	1.1211	2.61773	0.0291355	---	ENSRNOT00000086614
17824832	0.788012	2.13172	2.70518	0.0300491	---	GENSCAN00000014518
17640853	0.860058	2.34057	2.72141	0.0468641	Olr349	NM_001001019
17723744	0.844598	2.30853	2.73329	0.02355	---	---
17654267	0.259524	0.875784	3.37458	0.0170753	---	ENSRNOT00000090974
17821647	0.594846	2.14534	3.60655	0.0418641	---	ENSRNOT00000087929
17602839	0.579408	2.49877	4.31262	0.0115102	---	---
17604911	0.413148	2.04409	4.9476	0.0344171	---	---
17604685	0.409492	2.44657	5.97466	0.000683834	Zfp644	---
17606369	0.343182	2.16007	6.29422	0.0440766	---	---
17667996	0.0264971	0.305862	11.5432	0.0467924	---	ENSRNOT00000085153
17604483	0.162217	2.6258	16.187	0.00986794	---	---
17764253	0.000520964	1.03112	1979.26	0.0417537	---	---

## Sheet: male BPA0.5 vs Control male
Probe_ID	Male Control, MC (avg exp)	male BPA0.5, mBPA0.5 (avg exp)	mBPA0.5 vs MC (fold change)	mBPA0.5 vs MC (adj p-value)	Gene Symbol	mRNA Accession
17604765	1.87395	0.00327345	-572.47	0.000266586	---	---
17606477	2.65326	0.0348182	-76.2032	0.00273366	---	---
17604473	2.58101	0.0494645	-52.179	0.00202796	---	---
17818435	1.7341	0.0638096	-27.1762	0.0235344	Mir370	NR_032113
17734807	1.4843	0.0975158	-15.2211	0.0460125	---	---
17784060	1.60546	0.146134	-10.9862	0.00590686	---	ENSRNOT00000082621
17732252	1.89604	0.201424	-9.4132	0.0218968	---	---
17600097	3.19058	0.431412	-7.39566	0.0025767	---	---
17696686	1.59418	0.241596	-6.59852	0.0170036	---	ENSRNOT00000063328
17604599	2.70985	0.508155	-5.33272	0.0396423	---	---
17832383	2.47669	0.482479	-5.13325	0.0183069	---	---
17838416	3.16761	0.633349	-5.00137	0.0165895	---	---
17866861	1.73381	0.36879	-4.70135	0.0199183	---	ENSRNOT00000080255
17758222	2.16686	0.467825	-4.63176	0.0261514	---	GENSCAN00000018573
17602049	2.72168	0.640584	-4.24875	0.0360568	---	---
17821556	1.83198	0.461793	-3.96711	0.0272567	---	ENSRNOT00000086139
17605203	3.16377	0.837117	-3.77937	0.0133173	---	---
17676821	2.48568	0.6745	-3.68521	0.010031	---	XM_002727483
17654084	1.27542	0.357908	-3.56354	0.0476342	Olr1382	NM_214831
17692768	1.87242	0.533383	-3.51046	0.0104489	---	ENSRNOT00000089700
17784055	0.743472	0.217866	-3.41251	0.00110194	---	ENSRNOT00000078795
17605101	2.24885	0.691628	-3.25153	0.0488743	---	---
17721097	1.44692	0.463841	-3.11943	0.038217	---	ENSRNOT00000082162
17821733	2.88409	1.10755	-2.60402	0.0397242	---	ENSRNOT00000078501
17602055	3.45022	1.39095	-2.48048	0.0257371	---	---
17751284	2.67889	1.13759	-2.35488	0.00358572	---	GENSCAN00000028253
17607833	3.96206	1.72987	-2.29037	0.0119936	---	---
17607885	3.96206	1.72987	-2.29037	0.0119936	---	---
17652674	2.1791	0.980441	-2.22257	0.0366892	---	ENSRNOT00000079591
17821309	2.4586	1.14346	-2.15015	0.033732	---	ENSRNOT00000069531
17601143	3.0692	1.44542	-2.1234	0.0115968	---	---
17601477	3.0692	1.44542	-2.1234	0.0115968	---	---
17839735	1.3081	0.626249	-2.08878	0.0405864	---	ENSRNOT00000080369
17872929	3.38617	1.71276	-1.97702	0.0250699	---	ENSRNOT00000085184
17758831	2.09443	1.08324	-1.93349	0.00456259	---	---
17698547	2.71862	1.42092	-1.91328	0.00505502	---	---
17755805	3.02844	1.60713	-1.88438	0.0059575	---	ENSRNOT00000081975
17823578	3.0779	1.65957	-1.85463	0.00109451	---	ENSRNOT00000054608
17634774	3.08814	1.69723	-1.81952	0.0195135	Olr27	NM_001000936
17604587	4.2625	2.34785	-1.81549	0.0447395	---	---
17819311	3.30891	1.86754	-1.77181	0.00740903	---	---
17692037	3.29133	1.86186	-1.76776	0.0273911	Mir217	NR_031929
17705174	3.35283	1.93378	-1.73382	0.0357845	---	GENSCAN00000015076
17822060	1.60475	0.943751	-1.7004	0.0441528	---	---
17746449	3.01761	1.81881	-1.65912	0.0292434	---	GENSCAN00000037521
17791074	3.30743	2.01509	-1.64133	0.0489073	Olr803	NM_001000853
17604585	3.28145	2.03031	-1.61623	0.0422027	---	---
17726957	2.2565	1.39977	-1.61205	0.0399616	---	ENSRNOT00000089623
17723017	3.16236	1.96447	-1.60978	0.0058072	---	ENSRNOT00000079804
17818647	2.7868	1.73174	-1.60925	0.0101698	Mir379	NR_032124
17612426	2.64978	1.66504	-1.59143	0.0275217	---	GENSCAN00000035964
17704845	2.3576	1.48404	-1.58863	0.0333785	---	ENSRNOT00000088841
17658477	3.97874	2.5223	-1.57742	0.0337602	Olr1471	NM_001000722
17605755	4.00476	2.54812	-1.57166	0.0165287	---	---
17824501	3.91994	2.5141	-1.55919	0.00109479	Mir3545	NR_037319
17693128	3.12296	2.04267	-1.52886	0.0220575	---	ENSRNOT00000089796
17683397	2.15063	1.40713	-1.52837	0.031027	---	ENSRNOT00000091118
17839733	4.7133	3.10748	-1.51676	7.70602e-05	Ribc2	ENSRNOT00000078815
17628980	4.06448	2.72411	-1.49204	0.0421177	Mir3596c	NR_037379
17633641	2.5347	1.69906	-1.49182	0.0136685	RGD1561206	ENSRNOT00000021855
17712348	4.14432	2.77927	-1.49115	0.010214	---	ENSRNOT00000079003
17813508	3.46766	2.33985	-1.482	0.00555208	---	ENSRNOT00000087435
17747774	2.99611	2.04235	-1.46699	0.015195	---	ENSRNOT00000078742
17780948	4.4438	3.07304	-1.44606	0.00461394	---	---
17824340	2.77521	1.9196	-1.44573	0.0257275	Mir3579	NR_037372
17851321	2.9563	2.06291	-1.43307	0.0183232	Olr1307	NM_001000519
17714898	4.0842	2.86152	-1.42728	0.0344443	---	---
17791704	3.75348	2.63325	-1.42541	0.0101208	---	ENSRNOT00000086788
17667435	2.66277	1.88147	-1.41526	0.043515	---	ENSRNOT00000090829
17602095	4.93316	3.48817	-1.41426	0.00579827	---	---
17602975	4.2947	3.06486	-1.40127	0.0387811	---	---
17831908	3.26907	2.34721	-1.39275	0.00784329	---	ENSRNOT00000086801
17818687	2.38621	1.728	-1.3809	0.0316765	Mir381	NR_032129
17610263	5.02568	3.66142	-1.3726	0.000379467	---	---
17878660	2.57751	1.88055	-1.37062	0.049356	---	ENSRNOT00000088990
17607773	4.30134	3.1594	-1.36144	0.00562157	---	---
17607581	3.85115	2.85739	-1.34779	0.0405344	---	---
17608999	3.85115	2.85739	-1.34779	0.0405344	---	---
17717263	3.11293	2.31372	-1.34542	0.0241948	---	---
17858012	3.60097	2.68437	-1.34146	0.0163544	---	GENSCAN00000049601
17605207	2.7149	2.02694	-1.33941	0.0187536	---	---
17668584	3.18582	2.38731	-1.33448	0.00648336	---	ENSRNOT00000088826
17843241	4.34045	3.25732	-1.33252	0.0228325	---	GENSCAN00000041658
17831021	3.56286	2.67735	-1.33075	0.0124981	RGD1306782	XM_006226169
17711983	4.06993	3.06799	-1.32658	0.0135378	LOC100910977	XM_003751603
17725423	4.35019	3.2893	-1.32253	0.0160556	LOC103694185	XM_008772053
17746564	3.51956	2.6712	-1.31759	0.00633283	---	---
17665501	2.98571	2.26942	-1.31563	0.00548606	---	ENSRNOT00000084679
17607799	4.49697	3.43874	-1.30774	0.0403957	---	---
17607851	4.49697	3.43874	-1.30774	0.0403957	---	---
17879625	3.27127	2.50229	-1.30731	0.000804099	---	ENSRNOT00000063060
17858567	3.56715	2.72886	-1.3072	0.0139224	---	ENSRNOT00000069857
17815894	3.13907	2.40147	-1.30714	0.0432448	---	ENSRNOT00000077276
17613818	4.23332	3.23883	-1.30705	0.0357919	Ceacam11	NM_001025404
17818649	2.65855	2.03928	-1.30367	0.0287021	Mir411	NR_032275
17863211	4.29342	3.30574	-1.29878	0.0238052	---	XM_008758000
17810547	4.46653	3.45059	-1.29443	0.0434763	---	---
17608427	4.06155	3.13943	-1.29372	0.0402707	---	---
17721635	3.58315	2.77235	-1.29246	0.0396449	Psma8	NM_001108884
17865430	3.91226	3.02891	-1.29164	0.0468853	---	---
17873795	2.90516	2.25453	-1.28859	0.0273554	---	ENSRNOT00000078876
17604283	5.74617	4.47117	-1.28516	0.0447467	---	---
17629818	3.70455	2.88335	-1.28481	0.0116893	Vom1r48	NM_001008931
17790133	4.49912	3.50969	-1.28191	0.0337103	Pax4	NM_031799
17788736	3.9915	3.11515	-1.28132	0.00507857	---	---
17833162	3.06807	2.40957	-1.27329	0.0481874	Olr896	NM_001000059
17745151	4.05699	3.19305	-1.27057	0.0493733	Rab3c	NM_133536
17851258	4.04897	3.18752	-1.27026	0.042292	Olr1291	NM_001000797
17830364	3.09957	2.4516	-1.26431	0.0275959	---	ENSRNOT00000078365
17874493	3.80783	3.01304	-1.26379	0.0213099	---	ENSRNOT00000069022
17602041	5.23201	4.14928	-1.26094	0.00510308	---	---
17883742	4.90481	3.8909	-1.26058	0.0115192	---	---
17870837	2.77059	2.19787	-1.26058	0.0427114	---	ENSRNOT00000078060
17711142	3.01117	2.39087	-1.25944	0.0389677	---	ENSRNOT00000089247
17607667	4.55586	3.61875	-1.25896	0.0435535	---	---
17609085	4.55586	3.61875	-1.25896	0.0435535	---	---
17726649	4.09717	3.25763	-1.25771	0.0337757	Spink13	NM_001109539
17604027	4.67504	3.71824	-1.25732	0.028083	---	---
17810057	4.28386	3.42238	-1.25172	0.0302523	Olr866	NM_001000411
17795006	3.1741	2.53617	-1.25153	0.00783598	Tuba3a	NM_001040008
17869465	2.68543	2.14785	-1.25028	0.0375456	---	---
17606209	3.62521	2.9011	-1.2496	0.0392932	---	---
17716278	3.85379	3.08731	-1.24827	0.0215863	---	GENSCAN00000057733
17751732	3.73636	2.99465	-1.24768	0.0373691	---	ENSRNOT00000080968
17835248	5.0243	4.02867	-1.24714	0.0254702	Amdhd1	NM_001191781
17814793	3.50716	2.81324	-1.24666	0.0135561	---	ENSRNOT00000080164
17602697	4.44554	3.57099	-1.2449	0.0397561	---	---
17815372	4.37993	3.5186	-1.24479	0.0161712	---	---
17882985	4.37993	3.5186	-1.24479	0.0161712	---	---
17725233	4.3681	3.51272	-1.24351	0.0498391	---	GENSCAN00000034589
17617261	4.05355	3.26374	-1.242	0.026152	Mir211	NR_031924
17850733	3.23508	2.60575	-1.24151	0.0467331	---	---
17640636	4.40127	3.54535	-1.24142	0.0441299	Ms4a18	XM_008760254
17842225	3.58313	2.88767	-1.24084	0.0109933	---	ENSRNOT00000089268
17762720	4.02968	3.24851	-1.24047	0.0150425	Myo3b	NM_001191901
17805450	5.17616	4.17576	-1.23957	0.0444153	RGD1561849	NM_001109260
17681091	4.31943	3.48649	-1.23891	0.014335	Nphs2	NM_130828
17876479	4.42543	3.57218	-1.23886	0.0426445	Ott	XM_006257440
17787126	4.96046	4.00711	-1.23791	0.0375004	---	---
17881549	4.37016	3.53256	-1.23711	0.0047157	---	---
17715140	4.36467	3.53253	-1.23556	0.0384904	---	ENSRNOT00000079635
17718270	4.42073	3.57897	-1.2352	0.00445922	Cdhr2	XM_001070261
17635588	4.94451	4.00832	-1.23356	0.00262228	Olr121	NM_001000155
17730306	4.10534	3.33059	-1.23262	0.00202525	---	ENSRNOT00000086376
17653930	4.69404	3.81053	-1.23186	0.0233687	LOC100361104	XM_002727701
17606377	4.449	3.61689	-1.23006	0.00650399	---	---
17700648	4.00877	3.26514	-1.22775	0.00920883	---	ENSRNOT00000078641
17664233	4.16589	3.39667	-1.22646	0.00360662	---	GENSCAN00000019294
17633915	5.17879	4.22396	-1.22605	0.0102652	---	---
17690113	4.04769	3.30686	-1.22403	0.022101	---	GENSCAN00000046386
17703220	4.65984	3.81536	-1.22134	0.030265	---	---
17820928	5.11107	4.18693	-1.22072	0.0164666	Efr3b	XM_006225717
17679432	4.53858	3.72483	-1.21847	0.0343893	Serpinb12	NM_001135867
17829831	3.21985	2.64574	-1.21699	0.0458631	---	---
17880340	3.97398	3.27247	-1.21437	0.0395827	---	GENSCAN00000049630
17819544	4.83644	3.98666	-1.21315	0.0141011	Tmem196	NM_001044269
17629372	4.11162	3.39303	-1.21178	0.0242047	Apeg3	NR_130955
17791951	3.25814	2.69225	-1.2102	0.0352543	---	---
17692002	3.21356	2.65591	-1.20997	0.00739215	---	---
17600725	4.9625	4.10712	-1.20827	0.0370643	---	---
17610239	4.9625	4.10712	-1.20827	0.0370643	---	---
17681000	4.07362	3.37164	-1.2082	0.0453948	Shcbp1l	NM_001105961
17796638	4.26423	3.52952	-1.20816	0.0126874	Lix1	NM_001106214
17703186	3.48248	2.88522	-1.20701	0.0325386	Gzmf	NM_153466
17658479	4.38498	3.63372	-1.20675	0.0262613	Olr1474	NM_001000943
17837483	4.42794	3.67049	-1.20636	0.0209944	---	ENSRNOT00000082952
17843250	3.68757	3.06168	-1.20443	0.00840334	Olr1214	NM_001000438
17808901	4.31168	3.58002	-1.20438	0.02053	RGD1561212	XM_006225404
17878506	4.05616	3.36854	-1.20413	0.00739849	RGD1561552	NM_001126271
17606637	5.24197	4.35444	-1.20382	0.0466539	---	---
17796833	3.40855	2.83695	-1.20148	0.0332109	---	ENSRNOT00000087024
17615948	4.11526	3.42889	-1.20017	0.0425636	Klk5l	XM_008759478
17723509	4.47366	3.73111	-1.19902	0.00925815	---	---
17604931	6.03089	5.03469	-1.19787	0.0187207	---	---
17857689	4.56351	3.81401	-1.19651	0.0209285	Znrd1-as1	NM_001109479
17826858	3.98014	3.32689	-1.19635	0.0499934	---	---
17842247	3.26836	2.73468	-1.19515	0.00709915	Olr1162	NM_001000870
17768867	4.2187	3.53504	-1.19339	0.0422071	Spint5p	NM_001008881
17607037	4.77922	4.00564	-1.19312	0.0436761	---	---
17819539	4.11971	3.46027	-1.19058	0.0352178	---	GENSCAN00000045059
17809197	3.47798	2.92379	-1.18955	0.013	---	ENSRNOT00000083721
17617131	4.41946	3.71618	-1.18925	0.0101908	Gabrb3	NM_017065
17651608	3.51033	2.95224	-1.18904	0.0470802	FAM187A	NM_001013861
17880833	4.47545	3.76572	-1.18847	0.00728514	---	---
17778359	4.33967	3.65383	-1.1877	0.0321158	Foxs1	NM_001012091
17754036	3.80156	3.20321	-1.1868	0.0366658	---	ENSRNOT00000063363
17633331	4.55204	3.83844	-1.18591	0.0422759	---	---
17664442	3.54716	2.99456	-1.18454	0.0434817	---	ENSRNOT00000089032
17629992	4.82579	4.07741	-1.18354	0.000322478	Crx	NM_021855
17680673	5.33007	4.50398	-1.18341	0.0277776	---	GENSCAN00000028121
17603937	5.96281	5.04266	-1.18247	0.0308305	---	---
17743825	5.24689	4.44624	-1.18007	0.0398359	Rhobtb3	NM_001107645
17877145	4.93912	4.18582	-1.17997	0.0280869	Rai2	NM_001109316
17731839	4.44416	3.76816	-1.1794	0.0388203	Sez6l	NM_001134538
17854660	4.06307	3.4476	-1.17852	0.0435867	---	GENSCAN00000014350
17728243	4.74816	4.02964	-1.17831	0.036905	Irx3	NM_001107413
17866200	3.40202	2.88757	-1.17816	0.0232296	Alpp	XM_002727239
17880289	5.24401	4.45817	-1.17627	0.0132834	---	---
17777477	4.41969	3.75787	-1.17611	0.0289816	Adra1d	NM_024483
17651870	3.18134	2.70528	-1.17598	0.0150614	---	---
17651744	5.10741	4.35287	-1.17334	0.0352777	LOC100362422	XM_008768298
17707766	5.18721	4.42652	-1.17185	0.02797	---	---
17600525	5.04491	4.30617	-1.17155	0.0255368	---	---
17730701	4.99522	4.26702	-1.17066	0.0149065	Mir3564	NR_037347
17755592	4.9992	4.27458	-1.16952	0.031184	Ak9	XM_003753496
17711987	4.77	4.08054	-1.16896	0.0466894	Adam24	XM_008771287
17605493	4.02934	3.44695	-1.16896	0.0394892	---	---
17674882	5.1871	4.43791	-1.16882	0.047419	P2rx2	NM_053656
17674285	4.45239	3.8136	-1.1675	0.0246605	---	---
17729870	4.74805	4.07141	-1.16619	0.0318832	Mir140	NR_031779
17646209	4.03198	3.45876	-1.16573	0.0382692	---	GENSCAN00000031738
17698666	4.70178	4.03552	-1.1651	0.0269921	Psmb11	NM_001106032
17860307	5.06069	4.34433	-1.16489	0.0114479	LOC102548134	XR_349134
17783444	4.03089	3.46121	-1.16459	0.0119845	Aoc1	NM_022935
17757910	4.3265	3.71531	-1.16451	0.042698	---	---
17626408	4.7722	4.10006	-1.16393	0.005137	---	ENSRNOT00000063723
17848329	4.9053	4.21815	-1.1629	0.0399509	Lrrc2	NM_001012001
17872707	4.4724	3.84656	-1.1627	0.0433152	LOC100363193	NM_001177824
17878235	4.03254	3.4706	-1.16191	0.0372463	---	ENSRNOT00000029178
17753995	4.74376	4.08507	-1.16124	0.00391715	Pde9a	NM_138543
17605937	5.31342	4.57862	-1.16049	0.0423585	---	---
17834855	4.25176	3.66468	-1.1602	0.00472107	---	---
17813301	4.90891	4.23171	-1.16003	0.0460747	---	---
17666793	4.09701	3.53183	-1.16003	0.00245762	Camk2n2	NM_021678
17877407	3.43183	2.96071	-1.15912	0.0338453	---	GENSCAN00000055465
17737452	5.39274	4.65789	-1.15777	0.0341823	---	---
17619445	4.34172	3.75203	-1.15717	0.0373207	Olr282	NM_001000224
17774182	5.21355	4.50693	-1.15678	0.017502	Olr533	NM_001000673
17740626	4.11004	3.55493	-1.15615	0.00513863	C2cd4d	XM_006224209
17680226	5.00602	4.33109	-1.15583	0.0355578	Fmod	NM_080698
17881893	6.21223	5.37566	-1.15562	0.0278624	---	XM_006220950
17746010	4.73184	4.10043	-1.15399	0.0472869	LOC681117	XM_008775101
17675050	4.61371	3.99928	-1.15363	0.0272915	Tgfbr3l	XM_001067872
17880493	4.54576	3.94223	-1.15309	0.0179875	LOC100361313	XR_145838
17881867	4.62587	4.01389	-1.15247	0.0379959	---	XM_001070426
17757063	4.74725	4.12166	-1.15178	0.0281794	Mln	NM_001110056
17796026	4.84401	4.20808	-1.15112	0.0197412	Slc15a5	NM_001192015
17601975	4.85616	4.22178	-1.15026	0.0234775	---	---
17779178	4.31796	3.75612	-1.14958	0.00707604	Slpil2	NM_001008872
17635530	4.85565	4.22701	-1.14872	0.0296578	Olr56	NM_001000130
17807341	5.43005	4.72793	-1.14851	0.0395706	---	---
17883712	3.63018	3.16141	-1.14828	0.034139	---	---
17621989	4.0375	3.5199	-1.14705	0.0447077	Olr302	NM_001000238
17667778	4.34143	3.78556	-1.14684	0.00188589	Hunk	NM_001191662
17636071	5.42106	4.72909	-1.14632	0.0271432	St5	NM_001107547
17809243	4.28947	3.74397	-1.1457	0.0265843	---	ENSRNOT00000087881
17882409	4.79382	4.18449	-1.14562	0.0437338	---	XM_008761114
17607343	4.5801	3.99984	-1.14507	0.0399465	---	---
17645040	3.67794	3.21332	-1.14459	0.0119791	---	---
17611240	3.9819	3.47896	-1.14457	0.0393567	---	---
17665898	4.52292	3.95333	-1.14408	0.0314088	Nr1i2	NM_052980
17774919	5.31393	4.64601	-1.14376	0.049645	Fjx1	NM_001108955
17881251	3.29101	2.87915	-1.14305	0.049614	---	RPTR-J01347-2
17807247	5.91662	5.1766	-1.14295	0.0272349	Grin3a	ENSRNOT00000007957
17875442	4.37512	3.82936	-1.14252	0.0431811	Rhox13	XM_001077350
17668084	4.44367	3.89332	-1.14136	0.00447684	---	GENSCAN00000013707
17842218	5.07491	4.4545	-1.13928	0.0351609	---	---
17635592	4.49045	3.94438	-1.13844	0.0409327	Olr125	NM_001000740
17837066	4.32792	3.80469	-1.13752	0.0214973	---	GENSCAN00000050964
17741466	4.30916	3.7892	-1.13722	0.0339755	Ampd1	NM_138876
17863238	4.48289	3.94437	-1.13653	0.0292776	---	ENSRNOT00000078679
17680355	4.5618	4.01566	-1.136	0.0225948	Syt2	NM_012665
17621667	4.36562	3.84342	-1.13587	0.0367171	Fank1	NM_001008347
17726740	3.77497	3.32738	-1.13452	0.00601427	---	---
17876963	3.78207	3.33502	-1.13405	0.015733	---	GENSCAN00000041179
17785915	4.45141	3.9257	-1.13391	0.0270279	Cav3	NM_019155
17653468	4.25941	3.7572	-1.13367	0.0146477	Pla2g10	NM_017176
17875153	4.0581	3.58473	-1.13205	0.0204022	---	---
17821761	3.88203	3.4305	-1.13162	0.040638	---	ENSRNOT00000053560
17881048	4.42613	3.91327	-1.13106	0.0180838	RGD1566387	XM_006227517
17707849	4.90279	4.33507	-1.13096	0.0439849	---	GENSCAN00000022549
17834598	4.54197	4.01798	-1.13041	0.01538	Rfx4	XM_006241183
17880408	5.13007	4.54169	-1.12955	0.044496	---	---
17838174	4.65317	4.12156	-1.12898	0.0252532	LOC680316	XM_008765639
17711787	4.71316	4.17478	-1.12896	0.018255	Pdlim3	NM_053650
17825898	3.58838	3.17948	-1.1286	0.0328537	---	---
17611384	6.6974	5.9415	-1.12722	0.0256636	Slc6a18	NM_017163
17613881	5.16488	4.58433	-1.12664	0.0330411	Mypop	NM_001109139
17858653	4.07799	3.62007	-1.12649	0.0234	---	---
17747131	5.09323	4.52162	-1.12642	0.0283236	RGD1563562	XM_008760965
17866780	4.94147	4.38799	-1.12614	0.0292322	---	ENSRNOT00000034533
17771322	5.3048	4.71135	-1.12596	0.0214426	Ttc16	XM_003749453
17745668	5.08252	4.51635	-1.12536	0.0330013	---	NONRATT029036
17883722	4.06235	3.61007	-1.12528	0.0283363	---	---
17605563	4.56062	4.05305	-1.12523	0.0495059	---	---
17653743	4.62228	4.10834	-1.1251	0.0267794	RGD1564086	XM_001078704
17755954	4.68633	4.16661	-1.12473	0.0257499	Olr1700	NM_001001113
17618226	4.6821	4.16564	-1.12398	0.0195204	Ccdc89	NM_001134833
17848996	4.74263	4.22474	-1.12259	0.0333233	Cyp8b1	NM_031241
17755229	4.6512	4.1447	-1.1222	0.00197401	---	---
17824857	4.48736	3.99885	-1.12216	0.0263383	LOC100359684	XM_008764999
17600677	4.95032	4.42255	-1.11934	0.0022389	---	---
17610191	4.95032	4.42255	-1.11934	0.0022389	---	---
17682154	5.2778	4.71922	-1.11836	0.0294041	Cfap45	NM_001024882
17685893	3.956	3.54069	-1.1173	0.0394008	---	ENSRNOT00000063325
17764794	4.15147	3.71945	-1.11615	0.0346809	---	ENSRNOT00000083339
17824528	5.46651	4.90166	-1.11524	0.0380046	Ahnak2	XM_008776340
17621736	4.87992	4.37639	-1.11505	0.0245663	Nps	NM_001271113
17741853	2.9921	2.68366	-1.11493	0.0469971	---	ENSRNOT00000080814
17780106	4.62926	4.1593	-1.11299	0.0300017	Ptk6	NM_001108968
17812987	4.98995	4.48541	-1.11249	0.00736107	Phf13	NM_001107995
17629362	4.35375	3.91396	-1.11236	0.0334213	Usp29	NM_001108465
17880959	4.80697	4.32899	-1.11041	0.0177743	LOC103690545	XM_008758039
17807875	3.20763	2.88975	-1.11	0.0126191	---	---
17714085	3.57622	3.2224	-1.1098	0.0353148	Spata31d3	XM_008771468
17606959	5.2519	4.73265	-1.10971	0.0104128	---	---
17762222	2.55277	2.30083	-1.1095	0.0043187	---	---
17796702	4.95546	4.46736	-1.10926	0.0437448	Sbspon	XM_001063197
17607559	4.73234	4.26667	-1.10914	0.0106782	---	---
17608977	4.73234	4.26667	-1.10914	0.0106782	---	---
17626997	3.2045	2.88965	-1.10896	0.00524391	---	---
17865827	5.06904	4.57281	-1.10852	0.0384131	Scg2	NM_022669
17838798	5.1175	4.63651	-1.10374	0.0227434	Lrrc24	NM_001135896
17628622	4.53078	4.10551	-1.10359	0.0223698	Prr18	NM_001108464
17690395	5.19815	4.71193	-1.10319	0.043404	RGD1565560	XM_001060544
17883207	6.39885	5.81113	-1.10114	0.0352275	---	ENSRNOT00000051008
17774222	4.53612	4.12054	-1.10086	0.0499256	Olr576	NM_001000328
17768777	4.83252	4.39018	-1.10076	0.00253609	Svs4	NM_012662
17691728	4.58837	4.1707	-1.10014	0.0056303	---	GENSCAN00000058185
17880744	5.46237	4.96568	-1.10002	0.0185639	Rnf223	XM_003750095
17633495	3.88727	3.53421	-1.0999	0.0312385	---	---
17649863	4.71741	4.28988	-1.09966	0.0457145	Tbx4	NM_001107034
17754155	5.3135	4.83648	-1.09863	0.0122541	Aire	NM_001106379
17670915	4.85143	4.41773	-1.09817	0.0203563	LOC102546862	XM_008758295
17724615	4.84265	4.4161	-1.09659	0.0188374	Fbxo15	NM_001108436
17812857	4.84262	4.41885	-1.0959	0.0415783	Slc25a33	NM_001127574
17837303	4.5507	4.1544	-1.09539	0.0274886	Tnfrsf11b	NM_012870
17843069	5.4219	4.95451	-1.09434	0.0394409	LOC100360143	XM_002729890
17810045	5.56896	5.10597	-1.09068	0.0314205	Olr857	NM_001000583
17872499	5.14555	4.72324	-1.08941	0.0225326	LOC102557137	XM_006227331
17874991	5.30581	4.87184	-1.08908	0.0340736	LOC690082	XM_006227237
17734277	4.88242	4.48391	-1.08888	0.0130409	Spata2L	NM_001109133
17749142	5.15318	4.73633	-1.08801	0.00441718	---	GENSCAN00000033305
17881563	4.21607	3.87531	-1.08793	0.0204767	---	XM_001058772
17781466	4.76399	4.37981	-1.08772	0.0420305	---	GENSCAN00000003524
17630151	4.12639	3.79384	-1.08766	0.00662893	Psg19	NM_001270654
17699830	4.50623	4.14783	-1.08641	0.0489357	---	GENSCAN00000007817
17718926	4.99316	4.59748	-1.08607	0.038906	Dsp	XM_001058477
17679273	5.88822	5.42332	-1.08572	0.0420599	---	---
17628348	4.53163	4.17526	-1.08535	0.0437215	---	---
17823470	5.10425	4.70622	-1.08458	0.0403458	Gle1-ps1	XR_593191
17610669	5.04126	4.65234	-1.0836	0.0291295	Il22ra2	NM_001003404
17803832	5.55917	5.13089	-1.08347	0.0165616	---	ENSRNOT00000081393
17789901	6.24828	5.76731	-1.0834	0.01024	---	GENSCAN00000004108
17868867	4.40981	4.0717	-1.08304	0.00809616	LOC291863	NM_001013889
17604521	6.31331	5.83487	-1.082	0.0152636	---	---
17728345	6.50064	6.01024	-1.08159	0.0488845	Zfp423	NM_053583
17718493	4.41617	4.08396	-1.08135	0.0470513	RGD1565598	XM_008771566
17765785	5.7832	5.35009	-1.08095	0.0430753	Slc27a2	NM_031736
17806664	4.67723	4.33022	-1.08014	0.0129157	Ccl21	NM_001008513
17757895	6.14322	5.68898	-1.07984	0.0327525	Gstt3	NM_001137643
17711799	6.18605	5.73359	-1.07891	0.031101	Sorbs2	NM_053770
17683302	5.30809	4.92126	-1.0786	0.0499434	Plxna2	NM_001105988
17681887	8.25803	7.6678	-1.07697	0.0469162	---	---
17749641	5.50171	5.10866	-1.07694	0.0285951	Nudt17	NM_001109340
17881018	4.38544	4.07245	-1.07686	0.0465458	LOC102554287	XM_006227557
17774816	5.32768	4.94819	-1.07669	0.0114844	LOC103695174	XR_600271
17771045	4.63718	4.31157	-1.07552	0.0435909	---	ENSRNOT00000090574
17606779	5.51356	5.1297	-1.07483	0.0490517	---	---
17632098	5.41092	5.03678	-1.07428	0.00705836	---	AF145794
17605921	4.13061	3.84612	-1.07397	0.0475375	---	---
17751329	5.91867	5.51115	-1.07394	0.00769725	Egf	NM_012842
17654033	5.38657	5.03121	-1.07063	0.0491887	Olr1356	NM_001000493
17770733	5.14181	4.80515	-1.07006	0.0249402	Vegp2	NM_053574
17798119	7.28432	6.81352	-1.0691	0.040992	Dnai1	NM_001024342
17880903	5.4915	5.13774	-1.06885	0.0238977	---	---
17655482	5.36464	5.02845	-1.06686	0.0368388	---	---
17695800	7.05527	6.63196	-1.06383	0.0192776	RGD1308775	NM_001107233
17742987	5.50902	5.18563	-1.06236	0.00585283	LOC102555814	XM_006224273
17716193	5.98458	5.64935	-1.05934	0.0362258	RGD1564129	XM_001057382
17684680	5.81596	5.51705	-1.05418	0.0274789	Nr5a2	NM_021742
17625587	7.11387	6.75936	-1.05245	0.0380407	Dntt	NM_001012461
17742458	5.92073	5.62769	-1.05207	0.00465887	Fabp2	NM_013068
17720316	5.7365	5.46484	-1.04971	0.0291657	Dip2c	NM_001107360
17614529	4.14782	3.95319	-1.04923	0.0403049	LOC100360011	XM_006223314
17801679	5.59045	5.33222	-1.04843	0.048918	Guca2a	NM_013118
17608721	6.10126	5.82624	-1.0472	0.00305766	---	---
17883143	6.97384	6.67677	-1.04449	0.0454095	---	TUG1
17631022	5.77024	5.53249	-1.04297	0.0360917	LOC102549879	XR_342823
17719486	5.26863	5.05955	-1.04132	0.0376471	Hfe	NM_001173434
17657345	5.98449	5.76178	-1.03865	0.0274799	Glp2r	NM_021848
17816094	6.24488	6.01612	-1.03803	0.0406146	Cct6a-ps11	XR_593055
17759702	5.55986	5.36535	-1.03625	0.0382777	---	---
17631900	6.40206	6.18395	-1.03527	0.0462468	---	ENSRNOT00000086360
17627043	4.8825	4.72112	-1.03418	0.00993395	---	GENSCAN00000030727
17771148	7.29101	7.08889	-1.02851	0.0467311	Ier5l	NM_001025041
17731502	7.6512	7.44727	-1.02738	0.0140337	Drc7	NM_001106169
17616579	5.25183	5.12037	-1.02567	0.0461585	Ncr3lg1	XM_006223294
17780315	7.02104	6.85268	-1.02457	0.0338123	---	---
17689533	7.66475	7.48918	-1.02344	0.00931437	---	---
17649130	7.30076	7.18774	-1.01572	0.0380816	---	---
17714900	8.23912	8.38398	1.01758	0.0374588	---	---
17661796	11.3473	11.5777	1.02031	0.0493325	Lsm12	NM_001105843
17635628	4.98346	5.09204	1.02179	0.00774	Hbe2	NM_001024805
17831126	5.38009	5.51514	1.0251	0.0382708	43346	NM_019375
17811169	10.2693	10.528	1.02519	0.0345594	Wasf2	NM_001013167
17856096	6.49368	6.65818	1.02533	0.0139335	Arpp21	NM_001135045
17661100	6.79044	6.97156	1.02667	0.0304464	---	GENSCAN00000034873
17661102	6.79044	6.97156	1.02667	0.0304464	---	GENSCAN00000034862
17797130	5.46711	5.62848	1.02952	0.0396315	Fam110b	NM_001024341
17797345	6.04443	6.22593	1.03003	0.0458308	Triqk	NM_001171802
17602545	7.53134	7.77774	1.03272	0.0226196	---	---
17674388	5.68452	5.87141	1.03288	0.0354143	Ccdc60	NM_001034945
17835987	5.81168	6.00537	1.03333	0.0271864	RGD1306474	NM_001108746
17843231	5.60195	5.79003	1.03357	0.00454712	Olr1201	NM_001000818
17662959	5.32759	5.51347	1.03489	0.0378093	---	---
17605399	7.42392	7.68431	1.03507	0.0470317	---	---
17865053	9.52868	9.86854	1.03567	0.0187549	Klf7	NM_001108800
17665981	7.23781	7.50012	1.03624	0.0106629	Slc15a2	NM_031672
17720225	5.91499	6.13068	1.03647	0.0436876	---	---
17670575	8.27367	8.57909	1.03691	0.0329417	B3gnt5	NM_053932
17629913	7.54525	7.82685	1.03732	0.0332425	RGD1310257	XM_006223077
17765949	5.63984	5.85422	1.03801	0.0331586	Adra2b	NM_138505
17729875	6.03924	6.26967	1.03815	0.0294803	Zfhx3	XM_008772567
17712437	4.54327	4.71726	1.0383	0.0136603	---	ENSRNOT00000081241
17874383	5.0197	5.2132	1.03855	0.0157215	Rab33a	NM_001108257
17883195	10.7699	11.1932	1.03931	0.039408	---	ENSRNOT00000045072
17867282	10.7451	11.1682	1.03938	0.0487215	---	ENSRNOT00000045072
17646598	7.49275	7.79057	1.03975	0.0215681	---	---
17859789	5.75628	5.98548	1.03982	0.0133669	Cd28	NM_013121
17636301	10.2049	10.6225	1.04093	0.0182756	---	NONRATT006201
17636302	10.2049	10.6225	1.04093	0.0182756	---	---
17702182	8.19619	8.53227	1.041	0.0383011	---	ENSRNOT00000078665
17720390	7.11695	7.41213	1.04148	0.0282496	---	---
17843141	5.91189	6.15839	1.0417	0.0473169	Tmem218	NM_001008325
17770228	4.6212	4.81393	1.04171	0.045789	Grin1	NM_001270602
17850041	5.52939	5.76968	1.04346	0.00185568	Zfp560	XM_003750447
17728146	6.33351	6.61152	1.04389	0.0338474	LOC102557241	XM_008772245
17635403	9.37072	9.79402	1.04517	0.0161272	Folr2	NM_001106283
17605615	6.47945	6.77561	1.04571	0.0390717	---	---
17630961	5.13555	5.37327	1.04629	0.0334466	Map3k10	NM_001191621
17856604	5.14191	5.38422	1.04712	0.0494098	Cck	NM_012829
17806913	7.4035	7.75762	1.04783	0.015241	Spag8	NM_001173555
17757565	7.14753	7.49057	1.04799	0.000939384	LOC100365646	XM_006256266
17600875	7.95619	8.34013	1.04826	0.0290463	---	---
17723044	6.89553	7.22869	1.04832	0.0442443	LOC317165	ENSRNOT00000091759
17731468	5.92905	6.22095	1.04923	0.00453614	Tepp	NM_201655
17864386	6.60919	6.93554	1.04938	0.00707694	Stat4	NM_001012226
17822868	7.70346	8.087	1.04979	0.0123367	---	---
17776979	6.18011	6.4885	1.0499	0.0452881	Fahd2a	NM_001134834
17699255	8.78483	9.22393	1.04998	0.018711	---	---
17789285	6.56725	6.89612	1.05008	0.00522051	---	GENSCAN00000010705
17819983	6.54477	6.88372	1.05179	0.0265647	Prepl	NM_001010951
17600695	6.56339	6.90656	1.05229	0.0366709	---	---
17610209	6.56339	6.90656	1.05229	0.0366709	---	---
17688437	5.71841	6.01876	1.05252	0.0287407	---	ENSRNOT00000069193
17763583	4.79868	5.05393	1.05319	0.0271305	Olr458	NM_001000292
17802767	5.72356	6.03057	1.05364	0.00258103	Gpr3	NM_153727
17787099	8.70963	9.17966	1.05397	0.028151	---	---
17603633	5.89182	6.21173	1.0543	0.0257691	---	---
17731351	6.48207	6.83409	1.05431	0.0243502	Bean1	XM_006222658
17880477	7.56521	7.98548	1.05555	0.0169824	---	ENSRNOT00000091620
17609729	5.08891	5.37315	1.05585	0.0302911	---	---
17601853	6.15558	6.49966	1.0559	0.0218494	---	---
17781829	6.8736	7.26	1.05622	0.0362741	---	---
17761801	4.35714	4.60511	1.05691	0.037784	Olr429	NM_001000395
17760196	5.02882	5.31816	1.05754	0.0382292	LOC681186	XM_001060674
17827164	6.02615	6.37492	1.05788	0.013425	Cry1	NM_198750
17623689	7.20335	7.62216	1.05814	0.016741	---	ENSRNOT00000079816
17783246	4.43156	4.6914	1.05863	0.0187255	Sspo	NM_001007016
17779161	5.48764	5.81078	1.05889	0.0205615	Wfdc15b	NM_001009179
17850501	5.54001	5.86685	1.059	0.00760705	Ecsit	NM_001006986
17825880	4.76842	5.05178	1.05943	0.00999147	Olr954	NM_001000703
17600835	7.39639	7.83622	1.05947	0.0320266	---	---
17853338	6.94544	7.35853	1.05948	0.0460276	Map2k5	NM_001033987
17869946	7.24259	7.67516	1.05973	0.0128658	---	NONRATT004056
17879295	4.58828	4.86883	1.06114	0.0278335	MGC114492	NM_001024895
17853768	5.19536	5.51345	1.06122	0.0409833	Foxb1	NM_001013248
17835994	4.97877	5.28636	1.06178	0.00624348	---	---
17881785	5.55075	5.89512	1.06204	0.0318718	---	NR_037315
17655700	6.03678	6.41141	1.06206	0.0117263	Itk	NM_001108825
17710788	4.55382	4.83751	1.0623	0.0426573	B3gnt3	NM_001106068
17607465	5.94144	6.31234	1.06243	0.0260036	---	---
17642231	5.26782	5.59691	1.06247	0.0409677	Cnnm1	NM_001107593
17791428	7.00601	7.44595	1.0628	0.0272522	Jazf1	XM_001065610
17772416	5.2994	5.63456	1.06324	0.0422345	Acvr1c	NM_139090
17613250	5.09459	5.41857	1.06359	0.0400261	Lair1	NM_001029928
17796835	4.96666	5.28504	1.0641	0.0390687	Slco5a1	NM_001107898
17656932	6.66214	7.0931	1.06469	0.017374	---	ENSRNOT00000077141
17661091	4.58523	4.89251	1.06701	0.0294703	Krtap4-3	ENSRNOT00000066758
17797880	4.26788	4.55465	1.06719	0.000795411	Gabrr1	NM_017291
17602683	5.62056	5.99848	1.06724	0.0488341	---	---
17660362	6.29696	6.72339	1.06772	0.0173373	Ngfr	NM_012610
17651323	3.94078	4.20934	1.06815	0.0189624	---	ENSRNOT00000077603
17825043	6.10596	6.52248	1.06822	0.0133529	---	ENSRNOT00000065808
17600825	6.8393	7.30812	1.06855	0.0447939	---	---
17780007	5.44281	5.81657	1.06867	0.0031066	Gata5	NM_001024316
17850719	4.74071	5.06709	1.06885	0.0467466	Jam3	NM_001004269
17711396	6.06688	6.48667	1.06919	0.03831	Cbr4	NM_182672
17823147	4.87509	5.21383	1.06948	0.0482284	Fam161b	XR_593121
17651309	5.59914	5.99258	1.07027	0.0439309	---	ENSRNOT00000077603
17619464	8.08033	8.64914	1.07039	0.0426239	---	ENSRNOT00000088044
17831906	8.08033	8.64914	1.07039	0.0426239	---	ENSRNOT00000091986
17619333	3.44787	3.69091	1.07049	0.0237218	Olr230	NM_001000205
17613337	5.84805	6.26028	1.07049	0.0342126	Zfp606	XM_001063437
17669098	6.19578	6.63714	1.07124	0.0227414	Cd80	NM_012926
17634718	6.3254	6.77878	1.07168	0.0166609	---	ENSRNOT00000079387
17852677	5.36337	5.74783	1.07168	0.0288548	Cib2	NM_001015010
17609991	5.21416	5.5884	1.07177	0.0263609	---	---
17681962	4.3723	4.68718	1.07202	0.0382322	Itln1	ENSRNOT00000006196
17697861	6.34232	6.80507	1.07296	0.00989206	Gpr137c	NM_001134541
17808471	7.12969	7.65102	1.07312	0.0078377	Fam29a	FQ230383
17771113	4.50817	4.83872	1.07332	0.0273822	Sh3glb2	NM_001009692
17684469	5.45341	5.8537	1.0734	0.00604797	---	---
17681477	5.28827	5.67694	1.0735	0.0302266	Sele	NM_138879
17751231	4.76734	5.11787	1.07353	0.0155084	---	ENSRNOT00000086162
17708414	8.79276	9.44266	1.07391	0.0130658	---	---
17622534	4.92523	5.28989	1.07404	0.00871279	Kcnq1	NM_032073
17632723	10.6798	11.4745	1.07441	0.0449744	---	ENSRNOT00000087746
17651421	4.33877	4.66245	1.0746	0.0133485	Arl4d	NM_001107052
17642833	4.35746	4.68261	1.07462	0.0204829	LOC102550155	XM_008774860
17730478	5.45965	5.86745	1.07469	0.0170644	---	GENSCAN00000007883
17619191	4.64437	4.99337	1.07515	0.001072	LOC689730	XM_008773797
17764931	6.60368	7.10096	1.0753	0.0180958	Disp2	NM_001107759
17774693	4.22022	4.53843	1.0754	0.019338	Prdm11	NM_001271530
17609795	5.73415	6.16668	1.07543	0.00940532	---	---
17761968	5.40072	5.8083	1.07547	0.0225947	Kynu	NM_053902
17740451	5.22554	5.6199	1.07547	0.0091363	---	---
17782874	4.71607	5.07241	1.07556	0.0366006	---	ENSRNOT00000051964
17773982	5.36033	5.76546	1.07558	0.00376917	RGD1563348	NM_001114939
17695991	6.19115	6.6594	1.07563	0.0362295	---	---
17636637	5.09121	5.47677	1.07573	0.00711384	Tmc7	NM_001191950
17756750	5.60016	6.02577	1.076	0.035395	RT1-Db2	NM_001164826
17716920	5.26066	5.66074	1.07605	0.0303612	Gata3	NM_133293
17743715	5.64086	6.07456	1.07689	0.026683	---	ENSRNOT00000085731
17607293	5.37401	5.78749	1.07694	0.0223853	---	---
17826409	5.08342	5.47487	1.07701	0.0401528	Adamtsl5	NM_001108071
17797426	5.09331	5.48584	1.07707	0.0245169	Mmp16	NM_080776
17874691	5.66568	6.10481	1.07751	0.0417739	Cd40lg	NM_053353
17761856	6.467	6.96875	1.07759	0.0322662	---	---
17822865	6.99122	7.53412	1.07766	0.0369505	---	---
17695970	5.3321	5.74668	1.07775	0.03783	Kremen1	NM_053649
17623687	6.41342	6.91289	1.07788	0.0434801	---	ENSRNOT00000082766
17669396	7.34767	7.92064	1.07798	0.00167338	---	ENSRNOT00000080344
17791831	5.31222	5.72723	1.07812	0.0287988	---	ENSRNOT00000085160
17865955	5.53393	5.96672	1.07821	0.0351158	---	NONRATT058201
17609231	4.92764	5.31687	1.07899	0.0291545	---	---
17865793	4.82369	5.20529	1.07911	0.00430969	---	ENSRNOT00000085842
17687187	6.00636	6.48688	1.08	0.0482967	Nvl	NM_001105980
17605661	5.30178	5.72675	1.08016	0.0491325	---	---
17759826	5.41657	5.85166	1.08033	0.0306349	Fam166a	NM_001025694
17679983	5.38478	5.81912	1.08066	0.00642714	Slc26a9	NM_001107172
17766196	3.38353	3.65681	1.08077	0.0302488	---	ENSRNOT00000084288
17603477	6.65051	7.18836	1.08087	0.046624	---	---
17723274	4.83336	5.22582	1.0812	0.0430742	Prdm6	XM_001058066
17608857	6.89795	7.45817	1.08122	0.037558	---	---
17859645	10.6878	11.5618	1.08178	0.0393751	---	ENSRNOT00000083445
17878832	5.15206	5.57821	1.08272	0.0483772	Armcx2	NM_001014274
17604077	6.53416	7.07596	1.08292	0.00651168	---	---
17843415	4.33532	4.69534	1.08304	0.0452802	Tmem225	NM_001024359
17632774	4.97749	5.39104	1.08309	0.00641643	Dkkl1	NM_001109145
17746437	4.99126	5.40763	1.08342	0.0176507	Cyp7b1	NM_019138
17818103	5.49815	5.95811	1.08366	0.0471297	Ppp4r4	NM_001134632
17648341	5.75492	6.23728	1.08382	0.0270505	Olr1481	NM_001000527
17610003	5.91139	6.40778	1.08397	0.00844177	---	---
17736515	4.8489	5.25638	1.08404	0.0150108	Adamts12	NM_001106420
17608005	5.12796	5.55976	1.08421	0.0457858	---	---
17624523	9.76764	10.5957	1.08478	0.0363957	---	ENSRNOT00000079288
17736690	9.76764	10.5957	1.08478	0.0363957	---	ENSRNOT00000079288
17739042	9.76764	10.5957	1.08478	0.0363957	---	ENSRNOT00000079288
17839395	9.76764	10.5957	1.08478	0.0363957	LOC102549144	XR_593658
17856988	9.76764	10.5957	1.08478	0.0363957	---	ENSRNOT00000079288
17602523	7.00222	7.5966	1.08488	0.000313379	---	---
17645569	4.08848	4.43662	1.08515	0.00600404	Olr1407	NM_001000005
17789808	10.1558	11.0228	1.08537	0.0284722	---	ENSRNOT00000087755
17657197	4.82082	5.23346	1.08559	0.0482683	Zfp287	NM_001107008
17695292	4.83171	5.24704	1.08596	0.0165195	Msantd1	NM_001109089
17616068	4.79448	5.20749	1.08614	0.0208021	Fam71e1	XM_001077811
17882329	5.34894	5.81097	1.08638	0.0153006	---	XM_001053747
17794995	6.56782	7.13681	1.08663	0.0495249	Cd27	NM_001024335
17718771	5.71957	6.21593	1.08678	0.0245781	Phactr1	NM_214457
17872257	10.3474	11.2524	1.08747	0.0354839	---	ENSRNOT00000091839
17603085	4.02927	4.38293	1.08777	0.037468	---	---
17700130	6.64006	7.22565	1.08819	0.0374219	---	ENSRNOT00000070257
17715062	7.42581	8.08165	1.08832	0.0436132	Adtrp	NM_001014144
17609503	6.13143	6.67392	1.08848	0.0227312	---	---
17702438	5.28918	5.75779	1.0886	0.0464218	---	GENSCAN00000058645
17880863	6.02919	6.56495	1.08886	0.00458934	Smim24	XM_002726871
17866337	4.73986	5.16206	1.08908	0.0241455	Asb18	NM_001108231
17854027	4.53987	4.94569	1.08939	0.0279592	Tmod2	NM_031613
17793650	5.09643	5.55432	1.08984	0.0198505	---	GENSCAN00000045049
17627579	5.35655	5.84057	1.09036	0.0433756	Themis	XM_008758640
17602837	5.31367	5.79486	1.09056	0.00616209	---	---
17710308	4.63503	5.0586	1.09138	0.0310054	LOC100910026	XM_008771091
17840809	5.33111	5.8213	1.09195	0.00382276	---	NONRATT060008
17603429	5.94255	6.48947	1.09204	0.0282408	---	---
17607629	5.50079	6.00806	1.09222	0.00964773	---	---
17609047	5.50079	6.00806	1.09222	0.00964773	---	---
17821705	4.47807	4.89123	1.09226	0.0488489	Ndufa10l1	AY260163
17608163	3.71945	4.0638	1.09258	0.0425862	---	---
17609837	5.33616	5.8302	1.09258	0.0496889	---	---
17687318	5.97326	6.52713	1.09272	0.0470193	Disp1	NM_001105983
17619462	7.28511	7.96162	1.09286	0.0211998	---	ENSRNOT00000083317
17604311	5.36546	5.86423	1.09296	0.0243193	---	---
17745289	6.05692	6.62158	1.09322	0.048007	Gpx8	NM_001106411
17808188	4.84543	5.2973	1.09326	0.0193623	Tle1	NM_001173433
17834107	5.38767	5.89019	1.09327	0.0356266	Ilvbl	NM_001108738
17837385	4.23198	4.62702	1.09335	0.021188	---	---
17746435	9.08412	9.93964	1.09418	0.0492578	---	ENSRNOT00000086840
17743250	5.20334	5.69491	1.09447	0.0422579	---	---
17600815	5.67683	6.21684	1.09512	0.0301119	---	---
17637892	5.26728	5.76847	1.09515	0.0138231	Fam196a	NM_001143803
17878909	3.9588	4.33563	1.09519	0.0424406	Bex2	NM_001077435
17747408	4.63054	5.07162	1.09525	0.00417761	---	GENSCAN00000054092
17602231	5.02694	5.50716	1.09553	0.0256301	---	---
17633143	5.38959	5.90527	1.09568	0.0126302	Sergef	XM_001080802
17609229	5.35726	5.8699	1.09569	0.0133918	---	---
17754515	6.26463	6.86612	1.09601	0.0015611	Mir678	NR_032769
17810192	4.70688	5.1603	1.09633	0.0165618	Mir30c1	NR_031839
17830042	4.98962	5.47052	1.09638	0.0390709	RGD1563870	XM_006226132
17613921	4.16228	4.56354	1.0964	0.0206504	Rsph6a	NM_001024748
17634598	8.8568	9.71253	1.09662	0.0461637	---	ENSRNOT00000078695
17736456	4.27615	4.68937	1.09663	0.00950022	---	NONRATT031100
17670300	4.25518	4.6666	1.09669	0.0307739	---	---
17807740	3.96054	4.34382	1.09677	0.036786	Slc46a2	NM_001106652
17698012	5.66331	6.21196	1.09688	0.000757327	Peli2	NM_001107259
17755310	3.90645	4.28562	1.09706	0.0113914	---	---
17604317	5.22365	5.73216	1.09735	0.00163699	---	---
17658663	4.38859	4.81625	1.09745	0.0080369	Doc2b	NM_031142
17683012	5.28968	5.8076	1.09791	0.0406467	---	ENSRNOT00000090487
17601033	4.32479	4.74861	1.098	0.0317366	---	---
17601367	4.32479	4.74861	1.098	0.0317366	---	---
17708289	6.19025	6.79734	1.09807	0.00175488	---	ENSRNOT00000081731
17882621	4.49542	4.93696	1.09822	0.0409213	---	NM_181384
17725934	4.87458	5.35374	1.0983	0.033014	Prelid2	NM_001271333
17821876	4.67351	5.13558	1.09887	0.0401469	Gpr33	NM_001031823
17602285	5.02489	5.52212	1.09895	0.0323219	---	---
17604079	5.57806	6.13077	1.09909	0.0348509	---	---
17722661	4.72186	5.19007	1.09916	0.0144569	Pcdhb10	NM_001114603
17671285	6.34819	6.97875	1.09933	0.0470533	Fcer2	NM_001033924
17857482	6.05912	6.66199	1.0995	0.0472726	Abcc10	NM_001108201
17608641	5.97801	6.57395	1.09969	1.94209e-05	Gpbp1l1	---
17609491	5.57632	6.13381	1.09998	0.00609331	---	---
17862611	5.99573	6.597	1.10028	0.0456451	Tfeb	NM_001025707
17626410	5.40008	5.9438	1.10069	0.0205062	Ins1	NM_019129
17836732	4.87501	5.36752	1.10103	0.00273527	---	ENSRNOT00000077674
17815867	6.46741	7.12179	1.10118	0.0306539	---	ENSRNOT00000085819
17602483	5.95559	6.55886	1.10129	0.0197096	---	---
17603399	6.30686	6.94786	1.10164	0.0237044	---	---
17637963	4.10056	4.51855	1.10194	0.0199283	Tcerg1l	NM_001130077
17830985	5.20972	5.74224	1.10222	0.012025	Tef	NM_019194
17869572	5.01683	5.52983	1.10226	0.016468	---	---
17670116	7.8811	8.68904	1.10252	0.0213015	---	ENSRNOT00000078004
17868219	5.49866	6.06349	1.10272	0.0239266	---	---
17603831	5.79855	6.39573	1.10299	0.0338617	---	---
17600843	5.82245	6.42481	1.10345	0.0368408	---	---
17700678	5.06798	5.59305	1.10361	0.0123508	Cldn10	NM_001106058
17812668	8.35904	9.22894	1.10407	0.0259228	---	ENSRNOT00000086923
17614648	4.80084	5.30057	1.10409	0.0184831	RGD1560854	XR_590105
17770731	8.5263	9.4159	1.10434	0.0122641	---	ENSRNOT00000078426
17749668	6.35652	7.02005	1.10439	0.00126129	---	ENSRNOT00000082817
17600643	5.58255	6.16663	1.10463	0.0275509	---	---
17610157	5.58255	6.16663	1.10463	0.0275509	---	---
17678658	4.37342	4.83103	1.10463	0.0192501	Msi1	NM_148890
17808505	4.41225	4.8741	1.10467	0.0463778	---	GENSCAN00000019754
17691294	5.00724	5.53221	1.10484	0.00147748	Frg2	XM_006221826
17782636	5.30361	5.86138	1.10517	0.0266327	Tmem178b	NM_001195277
17813203	4.26067	4.7106	1.1056	0.0336049	Prkcz	NM_022507
17646717	8.16804	9.03491	1.10613	0.0390216	---	ENSRNOT00000085658
17705578	5.02583	5.55954	1.10619	0.0273322	Ipo5	XM_001075101
17602763	5.90176	6.52905	1.10629	0.0270749	---	---
17848541	5.13825	5.68606	1.10661	0.00432149	Osbpl10	XM_006244025
17852458	5.97577	6.61414	1.10683	0.014051	---	GENSCAN00000001647
17861308	6.26192	6.93108	1.10686	0.029596	---	ENSRNOT00000079897
17646114	6.3943	7.08122	1.10743	0.00434166	---	ENSRNOT00000085028
17808428	9.66089	10.6998	1.10753	0.00700337	---	ENSRNOT00000077459
17844986	8.45081	9.36204	1.10783	0.032651	---	ENSRNOT00000083337
17712654	4.18718	4.63896	1.1079	0.0394556	---	XM_008771371
17867689	5.09044	5.64196	1.10834	0.025468	---	NONRATT028202
17882115	5.11924	5.67431	1.10843	0.0475637	---	NM_001127609
17626665	4.15094	4.60196	1.10866	0.0294607	Vwa2	XM_003749146
17778324	6.36569	7.0577	1.10871	0.0295005	Defb29	NM_001037368
17702034	4.70962	5.22169	1.10873	0.0338953	Rnase12	NM_001012209
17655769	6.5491	7.26202	1.10886	0.0104384	---	ENSRNOT00000081230
17655771	6.5491	7.26202	1.10886	0.0104384	---	ENSRNOT00000081230
17822982	3.77944	4.19127	1.10896	0.0492141	Ccdc177	XM_006225839
17849826	6.3877	7.08688	1.10946	0.0208804	---	ENSRNOT00000091276
17706615	7.32751	8.13082	1.10963	0.00415634	---	ENSRNOT00000089356
17629290	4.12423	4.57965	1.11043	0.0315232	Mir290	NR_031937
17610460	7.47353	8.30068	1.11068	0.0303191	---	ENSRNOT00000080492
17775958	6.43131	7.14946	1.11167	0.0429207	Pla2g4e	XM_001080884
17698526	5.46631	6.07782	1.11187	0.0102927	---	NONRATT020335
17760451	7.04899	7.83868	1.11203	0.000236911	---	ENSRNOT00000077431
17723951	5.70829	6.34843	1.11214	0.0468672	---	ENSRNOT00000080776
17626561	8.26878	9.19748	1.11231	0.00788308	Tcf7l2	XM_008760555
17662220	4.30793	4.79362	1.11275	0.0250618	Lyzl6	NM_001135833
17744301	3.99721	4.44823	1.11283	0.0433952	Bhmt	NM_030850
17783565	4.80575	5.34818	1.11287	0.0430282	Nfe2l3	NM_001305047
17602719	5.17777	5.76406	1.11323	0.0177284	---	---
17656948	4.72065	5.25644	1.1135	0.0235538	Slc47a2	NM_001191920
17673387	10.483	11.6732	1.11354	0.0342611	---	ENSRNOT00000089881
17855551	4.65373	5.18258	1.11364	0.0396154	Sema3b	NM_001079942
17644009	6.18589	6.89034	1.11388	0.0356689	Nlrc3	XM_006220565
17769243	3.87966	4.32188	1.11398	0.00591659	Mc3r	ENSRNOT00000005871
17607747	5.28861	5.89194	1.11408	0.0401134	---	---
17609165	5.28861	5.89194	1.11408	0.0401134	---	---
17725088	4.66626	5.20062	1.11451	0.0284264	---	ENSRNOT00000086227
17746778	4.83636	5.39029	1.11454	0.0269717	---	ENSRNOT00000077191
17667228	5.63205	6.27864	1.11481	0.00698962	---	ENSRNOT00000079151
17641529	4.84855	5.40532	1.11483	0.0396601	---	---
17703427	4.37857	4.88143	1.11485	0.0334638	---	ENSRNOT00000090169
17724811	4.77199	5.32065	1.11497	0.00840517	---	GENSCAN00000041273
17711888	3.15381	3.51785	1.11543	0.0340567	Adam34	NM_001135090
17676012	4.56132	5.08809	1.11549	0.0337393	---	GENSCAN00000036104
17860202	4.15468	4.63564	1.11576	0.0122701	Spag16	NM_001134728
17842132	8.33648	9.30503	1.11618	0.00189367	Taf1d	XM_008765941
17844687	8.33648	9.30503	1.11618	0.00189367	---	ENSRNOT00000082211
17805293	4.7265	5.28143	1.11741	0.0165024	---	---
17622566	3.78853	4.23837	1.11874	0.00712734	---	ENSRNOT00000087467
17840722	5.70081	6.38031	1.11919	0.0119448	---	ENSRNOT00000081038
17619129	4.87726	5.45871	1.11922	0.0384506	Olr136	NM_001000160
17757127	6.01182	6.73256	1.11989	0.0469382	---	ENSRNOT00000087296
17602419	4.93702	5.52964	1.12004	0.00620507	---	---
17782860	5.24432	5.87557	1.12037	0.0311243	Trbv13-2	ENSRNOT00000091655
17722250	6.95606	7.79748	1.12096	0.00290817	---	ENSRNOT00000091913
17629072	3.33901	3.74548	1.12173	0.0471166	---	ENSRNOT00000033187
17603475	6.09066	6.83238	1.12178	0.044253	---	---
17766359	4.83759	5.42709	1.12186	0.0280923	---	ENSRNOT00000086857
17848896	9.10978	10.2214	1.12202	0.0464213	---	ENSRNOT00000090176
17714728	3.40354	3.82017	1.12241	0.0456013	LOC689526	XM_002725258
17827262	5.43504	6.1015	1.12262	0.00745572	Slc41a2	NM_001108742
17609731	5.13027	5.76648	1.12401	0.048827	---	---
17837735	4.55843	5.12557	1.12442	0.0190369	Kcnq3	NM_031597
17637563	5.10896	5.74602	1.1247	0.0275813	Cox6a2	NM_012812
17606359	4.84383	5.44946	1.12503	0.0263662	---	---
17878822	4.39276	4.94211	1.12506	0.00670205	Armcx6	NM_001007757
17752800	9.56423	10.7659	1.12564	0.0292926	---	ENSRNOT00000083081
17754240	4.23523	4.76942	1.12613	0.00957961	LOC690415	NM_001109590
17722383	10.7731	12.1323	1.12617	0.031606	---	ENSRNOT00000077339
17772780	5.49439	6.18832	1.1263	0.00121657	Cobll1	XM_006224464
17843424	5.27261	5.93862	1.12631	0.0341897	Zfp202	NM_001109290
17607307	5.20942	5.8679	1.1264	0.0347487	---	---
17739798	5.92109	6.67057	1.12658	0.000760939	---	ENSRNOT00000079068
17600931	3.57145	4.02517	1.12704	0.0127297	---	---
17601251	3.57145	4.02517	1.12704	0.0127297	---	---
17601265	3.57145	4.02517	1.12704	0.0127297	---	---
17706642	4.89826	5.52147	1.12723	0.0154963	Dydc1	XM_006222160
17674934	9.32959	10.5182	1.12741	0.012267	---	ENSRNOT00000053446
17674936	9.32959	10.5182	1.12741	0.012267	---	ENSRNOT00000053446
17674938	9.32959	10.5182	1.12741	0.012267	---	ENSRNOT00000053446
17882811	9.32959	10.5182	1.12741	0.012267	---	ENSRNOT00000053446
17882813	9.32959	10.5182	1.12741	0.012267	---	ENSRNOT00000053446
17882815	9.32959	10.5182	1.12741	0.012267	---	ENSRNOT00000053446
17602983	5.35222	6.03621	1.1278	0.0100104	---	---
17854623	3.72287	4.19889	1.12787	0.015316	Mir184	NR_031902
17790749	5.13614	5.79325	1.12794	0.0475024	Klrg2	XM_001072378
17862007	4.17638	4.71128	1.12808	0.0494429	---	ENSRNOT00000092057
17701790	4.68358	5.28475	1.12836	0.00341239	---	ENSRNOT00000090523
17612506	5.138	5.7989	1.12863	0.0305193	Zfp52	NM_001014158
17622279	11.0787	12.5038	1.12864	0.000679551	---	ENSRNOT00000078706
17709164	3.73782	4.21976	1.12894	0.0487894	---	GENSCAN00000047943
17644349	4.93633	5.57628	1.12964	0.0453728	---	ENSRNOT00000081773
17817527	4.52841	5.11611	1.12978	0.0119972	Flvcr2	NM_199109
17752747	5.25525	5.93751	1.12983	0.040598	Tnf	NM_012675
17633068	5.25415	5.93728	1.13002	0.0356614	Abcc8	NM_013039
17602605	4.32515	4.88822	1.13019	0.0369696	---	---
17769015	9.06561	10.2479	1.13041	0.011251	---	ENSRNOT00000053446
17706871	5.01031	5.66494	1.13066	0.00537471	Gtpbp3	NM_001011919
17707450	4.76738	5.39238	1.1311	0.0385189	---	ENSRNOT00000079119
17795640	4.69236	5.30763	1.13112	0.0246459	Klra2	NM_001009718
17665483	5.62878	6.37005	1.13169	0.00031304	Trat1	NM_001037981
17660582	4.58139	5.18823	1.13246	0.00759203	Srcin1	NM_019378
17831297	5.13952	5.82602	1.13357	0.0350344	Arhgap8	NM_001004242
17608477	5.38101	6.10111	1.13382	0.0394552	---	---
17628333	4.65875	5.28507	1.13444	0.0490021	Nox3	NM_001004216
17842284	4.22736	4.79744	1.13486	0.00418231	Olr1191	NM_001000981
17602333	6.18915	7.02394	1.13488	0.0463297	---	---
17860610	4.86796	5.52663	1.13531	0.0441094	Des	NM_022531
17603421	5.64489	6.41012	1.13556	0.0240617	---	---
17879977	6.08864	6.91726	1.13609	0.0281858	---	ENSRNOT00000077572
17861509	4.66532	5.30177	1.13642	0.0175902	Mlph	NM_001012135
17602263	5.22077	5.93417	1.13665	0.0410794	---	---
17609499	5.37517	6.11159	1.137	0.0444241	---	---
17785255	4.94869	5.62885	1.13744	0.0298889	Efcc1	NM_001163921
17856201	4.66875	5.31094	1.13755	0.00222581	---	ENSRNOT00000088307
17773418	5.48697	6.24865	1.13882	0.00622573	Ttn	XM_008761978
17605171	5.01084	5.70713	1.13896	0.0428545	---	---
17793041	3.66061	4.1694	1.13899	0.0108495	---	NONRATT041720
17866827	3.94432	4.49301	1.13911	0.0232727	RGD1560925	XR_349259
17868535	3.81505	4.34628	1.13925	0.0340873	---	---
17611421	4.6687	5.31886	1.13926	0.0399852	Iyd	NM_001025000
17675730	4.43887	5.05962	1.13984	0.0169625	Cyp3a2	NM_153312
17864112	7.73069	8.81432	1.14017	0.0175214	---	ENSRNOT00000085682
17883774	3.00118	3.42221	1.14029	0.0154788	---	---
17604445	5.30372	6.05192	1.14107	0.0427159	---	---
17848607	5.53965	6.32142	1.14112	0.00406883	Eomes	XM_006226608
17655783	4.54642	5.18844	1.14122	0.0140634	Olr1383	NM_214832
17600495	4.59038	5.24039	1.1416	0.0332334	---	---
17627770	4.94073	5.6475	1.14305	0.0177396	Vnn3	NM_001109136
17761861	4.81878	5.51024	1.14349	0.0281914	---	---
17839665	4.01404	4.59035	1.14357	0.0224508	RGD1566029	XM_006226181
17623647	3.84451	4.39651	1.14358	0.00740246	Slc22a8	NM_031332
17602829	5.00091	5.71977	1.14375	0.0254061	---	---
17603413	5.51073	6.30416	1.14398	0.0312256	---	---
17600827	5.67448	6.49252	1.14416	0.0139113	---	---
17607383	4.81809	5.51704	1.14507	2.95683e-05	Elp2	---
17632602	4.66931	5.34712	1.14516	0.0317172	Cpt1c	NM_001034925
17875323	3.88463	4.44864	1.14519	0.0444118	---	GENSCAN00000042974
17611073	8.02395	9.19107	1.14545	0.00950916	---	ENSRNOT00000084929
17789082	7.28685	8.35021	1.14593	0.0243689	---	ENSRNOT00000053977
17605331	5.15869	5.91182	1.14599	0.0303645	---	---
17795160	4.39451	5.0368	1.14616	0.0152674	LOC689519	XM_006225063
17674312	4.27804	4.9038	1.14627	0.0397466	---	---
17604913	4.4575	5.10969	1.14631	0.0285351	---	---
17657302	4.23694	4.85985	1.14702	0.02901	Dnah9	XM_002724507
17635257	4.79324	5.50031	1.14751	0.0481119	Dnajb13	NM_001005885
17607619	4.81021	5.52031	1.14762	0.0230198	---	---
17609037	4.81021	5.52031	1.14762	0.0230198	---	---
17600601	5.02641	5.7731	1.14855	0.00568797	---	---
17610115	5.02641	5.7731	1.14855	0.00568797	---	---
17733462	3.8806	4.45808	1.14881	0.00915262	Chst4	NM_001107427
17653002	6.03668	6.9352	1.14884	0.0153262	---	ENSRNOT00000081692
17861243	4.66613	5.36439	1.14965	0.0458061	RGD1311447	NM_001134587
17698694	4.45013	5.11891	1.15028	0.0382252	Cmtm5	NM_001106034
17864430	4.13392	4.75956	1.15134	0.00905689	---	ENSRNOT00000083077
17816196	3.96296	4.56444	1.15177	0.0117597	---	GENSCAN00000034593
17605849	4.68247	5.39548	1.15227	0.0203122	---	---
17605439	4.05109	4.669	1.15253	0.016644	---	---
17798022	5.22577	6.02608	1.15315	0.0095475	---	ENSRNOT00000091691
17630020	4.63584	5.34601	1.15319	0.00971563	---	ENSRNOT00000084625
17706987	8.7195	10.056	1.15328	0.0396261	---	ENSRNOT00000085683
17615462	3.96934	4.57874	1.15352	0.0230285	---	---
17809353	4.2589	4.91312	1.15361	0.00032625	Slc5a9	NM_001108974
17604255	4.70115	5.4311	1.15527	0.0267625	---	---
17712905	3.47988	4.02083	1.15545	0.0433637	LOC688801	XR_146347
17876198	4.67537	5.4054	1.15614	0.0257705	Pim2	NM_001172103
17883786	3.33978	3.86233	1.15646	0.0440486	---	---
17850784	4.35701	5.04204	1.15722	0.0262583	---	ENSRNOT00000087292
17611071	7.21852	8.35434	1.15735	0.0163844	---	ENSRNOT00000077255
17665319	5.23195	6.06979	1.16014	0.0299349	---	ENSRNOT00000091706
17645038	6.25802	7.26249	1.16051	0.0233047	---	ENSRNOT00000080287
17836741	6.25802	7.26249	1.16051	0.0233047	---	ENSRNOT00000080287
17673385	9.12401	10.5918	1.16087	0.0328332	---	ENSRNOT00000083071
17679501	4.17082	4.84388	1.16138	0.0309773	---	ENSRNOT00000078587
17661785	3.42812	3.98195	1.16156	0.0436782	Pyy	NM_001034080
17876144	3.87242	4.49907	1.16183	0.0205089	Ssx1	XM_008758338
17818965	7.39205	8.58974	1.16202	0.0217266	---	ENSRNOT00000088162
17779169	3.86254	4.49083	1.16266	0.0202336	Svs3b	NM_001102417
17743678	3.44986	4.0115	1.1628	0.0129235	---	ENSRNOT00000082326
17761570	5.86104	6.8198	1.16358	0.000829019	---	ENSRNOT00000090384
17638131	4.36142	5.07658	1.16397	0.0211989	Msx3	NM_053712
17610001	5.24566	6.1081	1.16441	0.00212383	Ccz1b	---
17722610	7.16669	8.34571	1.16451	0.00712676	---	NONRATT025802
17854179	3.85713	4.49267	1.16477	0.00790842	LOC367117	NM_001047919
17690143	3.51692	4.09653	1.16481	0.0461662	Sel1l3	XM_006251033
17652123	5.0394	5.87434	1.16568	0.0324235	---	ENSRNOT00000081749
17809650	6.52843	7.61412	1.1663	0.0448321	---	ENSRNOT00000086480
17678148	7.49617	8.74439	1.16651	0.0120575	---	ENSRNOT00000087390
17840724	5.96753	6.96155	1.16657	0.011844	---	ENSRNOT00000079851
17658370	4.30195	5.01894	1.16667	0.0335431	Slc13a5	NM_170668
17880732	4.29446	5.01426	1.16761	0.0286911	RGD1309291	XR_145981
17602945	4.80418	5.61066	1.16787	0.0240759	---	---
17751221	7.43347	8.68228	1.168	0.0499977	---	ENSRNOT00000086241
17865716	3.92672	4.58684	1.16811	0.0470836	Resp18	NM_019278
17725192	4.34702	5.08186	1.16905	0.0269059	---	ENSRNOT00000069481
17602809	4.49571	5.25664	1.16926	0.00366546	---	---
17845815	4.65784	5.44787	1.16961	0.0298271	Mir628	NR_032749
17606523	1.85323	2.16945	1.17063	0.0347543	---	---
17603597	4.83674	5.66286	1.1708	0.0420618	---	---
17694643	3.12806	3.66352	1.17118	0.0395297	---	---
17775329	3.63625	4.25919	1.17131	0.048809	Olr791	NM_001000580
17671538	5.90456	6.91893	1.1718	0.0251713	---	ENSRNOT00000052581
17851963	5.43907	6.37419	1.17193	0.0132949	Cd3e	NM_001108140
17604869	5.4237	6.3584	1.17234	0.00878611	---	---
17793995	6.58479	7.73036	1.17397	0.0151377	---	ENSRNOT00000079576
17825181	6.58479	7.73036	1.17397	0.0151377	---	ENSRNOT00000079576
17607563	5.47698	6.43266	1.17449	0.0223978	---	---
17608981	5.47698	6.43266	1.17449	0.0223978	---	---
17721629	4.21376	4.95005	1.17474	0.0422138	Hrh4	NM_131909
17729194	2.66648	3.13252	1.17478	0.041085	---	ENSRNOT00000081481
17795742	3.88502	4.56456	1.17491	0.0394319	Tas2r104	NM_001166681
17604955	4.74311	5.57475	1.17534	0.00551595	---	---
17677765	3.97768	4.67601	1.17556	0.0427789	LOC100359550	ENSRNOT00000001672
17608415	4.53664	5.33498	1.17598	0.0303879	---	---
17828680	4.14292	4.87395	1.17645	0.0303916	Stac3	NM_001130558
17764152	4.39408	5.16943	1.17645	0.00546438	---	---
17600897	5.68563	6.69022	1.17669	0.0309982	---	---
17601217	5.68563	6.69022	1.17669	0.0309982	---	---
17752147	4.44408	5.2347	1.1779	0.000387001	Tnni3k	NM_181769
17673258	3.84071	4.52958	1.17936	0.0345245	---	ENSRNOT00000070530
17792222	5.62371	6.63308	1.17948	0.000891317	Ptcd3	ENSRNOT00000078991
17774100	7.82822	9.23367	1.17954	0.000217206	---	ENSRNOT00000077267
17623679	9.38824	11.0985	1.18217	0.0121536	---	ENSRNOT00000088786
17626637	4.36676	5.16327	1.1824	0.0413934	Tdrd1	NM_001106202
17609387	3.80882	4.5046	1.18267	0.0342861	---	---
17605033	3.83954	4.5446	1.18363	0.0388825	---	---
17772814	3.73418	4.42537	1.1851	0.0153078	---	ENSRNOT00000052876
17848894	6.5733	7.79406	1.18572	0.00476093	---	ENSRNOT00000083758
17866175	5.55546	6.59151	1.18649	0.00171909	---	ENSRNOT00000080697
17725726	3.74301	4.44127	1.18655	0.0211495	Dnd1	NM_001109379
17692576	7.23105	8.58445	1.18716	0.0236996	---	ENSRNOT00000085510
17882549	3.51873	4.18319	1.18884	0.0405466	---	XM_008758216
17603107	3.85525	4.59094	1.19083	0.0207877	---	---
17607005	4.43124	5.27978	1.19149	0.037811	---	---
17690210	4.07568	4.8565	1.19158	0.00166485	Ppargc1a	NM_031347
17613307	3.08252	3.67442	1.19202	0.0333105	Vom1r42	NM_001008959
17823658	4.15105	4.95328	1.19326	0.0335523	Eml5	NM_001003402
17692574	7.15696	8.54885	1.19448	0.0369159	---	ENSRNOT00000082867
17870751	3.45344	4.12595	1.19474	0.00922198	---	GENSCAN00000032848
17751177	5.39366	6.44749	1.19538	0.0251181	---	ENSRNOT00000084360
17604243	3.89427	4.6564	1.19571	0.00474462	Slc35c1	---
17709281	4.08073	4.88124	1.19617	0.0207886	---	ENSRNOT00000057740
17668766	3.46299	4.14477	1.19687	0.0328773	Retnla	NM_053333
17873519	3.00663	3.59982	1.19729	0.0101599	---	GENSCAN00000051073
17665753	6.55229	7.84962	1.198	0.0108109	---	ENSRNOT00000084982
17600157	5.30988	6.36233	1.19821	0.0387048	---	---
17656333	3.42296	4.10192	1.19835	0.00560107	Glra1	NM_013133
17784270	4.58086	5.49202	1.19891	0.000902843	---	ENSRNOT00000077772
17766248	6.2924	7.54546	1.19914	0.0149804	---	ENSRNOT00000082756
17614147	4.1013	4.91812	1.19916	0.00259857	LOC102548600	XM_008759057
17801861	9.31516	11.1835	1.20057	0.0173466	---	ENSRNOT00000088888
17710187	6.1571	7.39488	1.20103	0.00692102	---	ENSRNOT00000081926
17657789	8.28301	9.94848	1.20107	0.0132347	---	ENSRNOT00000079842
17787622	4.69168	5.65053	1.20437	0.000154897	Prb3	NM_139184
17755135	2.84719	3.43205	1.20542	0.0456905	---	---
17866724	4.20372	5.06788	1.20557	0.0253044	Pdcd1	NM_001106927
17609243	3.28918	3.97049	1.20714	0.011031	---	---
17716952	4.18621	5.06144	1.20907	0.0138241	Dhtkd1	NM_001025720
17806617	3.25179	3.93237	1.2093	0.04309	Enho	NM_001282336
17646600	3.55668	4.30263	1.20973	0.0119251	Mfap4	NM_001034124
17778973	5.26364	6.36776	1.20976	0.0441529	---	ENSRNOT00000084801
17851021	3.7366	4.52652	1.2114	0.0462106	---	GENSCAN00000039175
17881088	3.15897	3.82685	1.21142	0.0364475	---	---
17606655	3.55082	4.30196	1.21154	0.0304154	---	---
17607823	3.81707	4.62887	1.21268	0.0101856	---	---
17607875	3.81707	4.62887	1.21268	0.0101856	---	---
17809652	7.91303	9.60135	1.21336	0.00459691	---	ENSRNOT00000082779
17609591	4.31649	5.23769	1.21341	0.0306491	---	---
17797594	3.70893	4.50777	1.21538	0.0175141	---	ENSRNOT00000088690
17633659	3.64737	4.43457	1.21583	0.0239886	---	---
17608709	4.22177	5.14347	1.21832	0.00306357	---	---
17881255	2.89909	3.5371	1.22008	0.0365664	---	RPTR-J01347-4
17637987	3.40649	4.15805	1.22063	0.0472268	Stk32c	NM_001108922
17846276	4.24452	5.18166	1.22079	0.00868848	---	---
17614865	6.49177	7.93697	1.22262	0.0144712	---	ENSRNOT00000080795
17801863	7.78596	9.52362	1.22318	0.0340832	---	ENSRNOT00000083798
17835135	8.20435	10.0393	1.22366	0.0129031	---	ENSRNOT00000080363
17605191	4.00672	4.90382	1.2239	0.0101897	---	---
17765469	4.77053	5.84168	1.22454	0.0271907	---	ENSRNOT00000079001
17605475	4.03917	4.95342	1.22635	0.0401775	---	---
17803755	6.79976	8.34193	1.2268	0.00754818	---	ENSRNOT00000080569
17735293	5.17807	6.35758	1.22779	0.0125394	---	ENSRNOT00000069461
17600299	4.20118	5.15996	1.22822	0.010511	---	---
17759143	7.36099	9.0774	1.23318	0.00470709	---	ENSRNOT00000091170
17870607	7.36099	9.0774	1.23318	0.00470709	---	ENSRNOT00000083166
17651521	3.52173	4.34351	1.23334	0.0456183	Rundc3a	NM_198758
17638660	3.59428	4.43982	1.23524	0.000145616	Ascl2	NM_031503
17762620	3.90056	4.82428	1.23682	0.0148615	Klhl41	NM_057191
17826696	3.35767	4.15616	1.23781	0.0048605	Olr1085	NM_001000420
17790823	3.80276	4.70891	1.23829	0.00734771	Dennd2a	XM_006224879
17713280	3.60181	4.4619	1.23879	0.0236235	---	GENSCAN00000034646
17603387	4.10367	5.08381	1.23884	0.0456386	---	---
17617898	3.63532	4.50741	1.23989	0.0478643	---	ENSRNOT00000087677
17688794	5.33014	6.60882	1.2399	0.0145977	---	ENSRNOT00000090415
17829493	3.58597	4.45067	1.24114	0.0202567	---	ENSRNOT00000054629
17883003	3.58597	4.45067	1.24114	0.0202567	---	ENSRNOT00000054629
17727794	7.65551	9.50249	1.24126	0.00329427	---	ENSRNOT00000080595
17602873	4.11747	5.11648	1.24263	0.00334317	---	---
17870218	4.02589	5.00623	1.24351	0.0340405	---	NONRATT048877
17781469	3.34436	4.16426	1.24516	0.0473445	Asb4	NM_001024318
17604121	4.21763	5.25597	1.24619	0.0183051	---	---
17605823	4.54784	5.66926	1.24658	0.00188687	---	---
17619502	8.43166	10.5136	1.24692	0.0236948	---	ENSRNOT00000087551
17601789	3.38371	4.24609	1.25486	0.0302927	---	---
17761755	3.47734	4.3694	1.25653	0.0286913	Olr396	NM_001000831
17600133	4.47971	5.6294	1.25665	0.00942677	---	---
17609383	4.86394	6.11394	1.25699	0.037053	---	---
17742696	3.40646	4.28521	1.25796	0.00476853	Gimd1	NM_001113782
17705438	3.33751	4.19936	1.25823	0.00617665	Zic5	NM_001108391
17608811	4.36189	5.49103	1.25887	0.0449988	---	---
17727949	5.19343	6.54196	1.25966	0.00300418	---	ENSRNOT00000087539
17602609	4.03196	5.07892	1.25966	0.0230682	---	---
17604851	4.47566	5.64144	1.26047	0.0227827	---	---
17603723	4.46495	5.63096	1.26115	0.0105338	---	---
17665436	3.50676	4.42607	1.26215	0.0305789	LOC100909977	XM_006221121
17827629	3.29609	4.16189	1.26267	0.0303946	Ntn4	NM_001106780
17796700	3.38697	4.27973	1.26359	0.00649371	LOC100912291	XR_346305
17605821	4.19566	5.30956	1.26549	0.0101345	---	---
17605795	3.91966	4.97044	1.26808	0.0266026	---	---
17660657	7.70898	9.79017	1.26997	0.00815289	---	ENSRNOT00000087314
17701283	3.0747	3.90951	1.27151	0.0321216	---	GENSCAN00000042571
17675697	7.40362	9.42216	1.27264	0.0166365	---	ENSRNOT00000081251
17755886	3.92062	4.99067	1.27293	0.0400148	---	ENSRNOT00000069704
17619216	2.24212	2.85762	1.27452	0.0358675	Olr200	NM_001000189
17609287	4.67051	5.95623	1.27528	0.00125407	---	---
17833185	2.9405	3.74996	1.27528	0.00529672	Olr922	NM_001000705
17856890	3.88966	4.96494	1.27645	0.0149131	Sult1c3	NM_031732
17766357	3.03753	3.8778	1.27663	0.0120427	---	ENSRNOT00000079927
17624216	4.69841	6.0137	1.27995	0.0492323	---	ENSRNOT00000080847
17848806	2.52576	3.23311	1.28005	0.00458412	---	ENSRNOT00000086832
17627860	3.04309	3.91169	1.28543	0.041644	---	ENSRNOT00000088262
17608881	4.19336	5.39209	1.28586	0.0083225	---	---
17787247	6.2751	8.07094	1.28619	0.0192496	---	ENSRNOT00000081653
17692926	2.59146	3.34116	1.2893	0.0312709	---	---
17609869	3.299	4.27159	1.29481	0.0090504	---	---
17877689	2.86779	3.71337	1.29485	0.0258957	---	ENSRNOT00000082581
17604181	3.4257	4.44145	1.29651	0.0289306	---	---
17743875	3.35606	4.35255	1.29692	0.0291729	---	ENSRNOT00000090582
17696200	5.88964	7.66877	1.30208	0.00204185	---	ENSRNOT00000092149
17605413	3.76388	4.90913	1.30427	0.00182024	---	---
17802806	4.89746	6.38809	1.30437	0.0311163	---	ENSRNOT00000087842
17666929	2.06351	2.69465	1.30586	0.00997397	---	---
17779174	3.08036	4.03062	1.30849	0.00252703	RGD1563818	XM_006235625
17605639	4.31148	5.65269	1.31108	0.0475922	---	---
17609599	3.74372	4.90943	1.31138	0.0305655	---	---
17717437	3.5333	4.63969	1.31313	0.0366312	Etl4	XM_006222481
17747682	3.32804	4.37142	1.31351	0.0232307	---	ENSRNOT00000083113
17806228	2.80903	3.69832	1.31659	0.0119223	---	---
17606177	3.51429	4.65252	1.32389	0.00126276	---	---
17647364	5.30953	7.04667	1.32717	0.00429917	---	ENSRNOT00000083120
17604845	3.64395	4.83732	1.32749	0.0182283	---	---
17602907	3.2895	4.37023	1.32854	0.0301569	---	---
17678168	3.21174	4.26918	1.32924	0.0011649	Oas1f	NM_001009490
17822238	2.9306	3.90295	1.33179	0.0269728	---	ENSRNOT00000083883
17615770	3.11087	4.14344	1.33192	0.0448811	Lim2	NM_053771
17651872	2.69117	3.62988	1.34881	0.0482945	Efcab3	NM_001013972
17837576	3.05174	4.13269	1.35421	0.0240156	LOC690120	NR_131067
17605703	3.18505	4.31379	1.35439	0.00508921	---	---
17606227	3.8455	5.21413	1.35591	0.0489303	---	---
17605597	3.80427	5.16915	1.35878	0.00792686	---	---
17603077	3.50295	4.76633	1.36066	0.0202256	---	---
17609255	3.42848	4.70177	1.37138	0.00160828	---	---
17763710	1.93713	2.66333	1.37488	0.0224702	Olr623	ENSRNOT00000071021
17732273	3.04689	4.19573	1.37705	0.0419003	---	---
17691637	3.5488	4.91011	1.3836	0.0274597	---	---
17862492	2.89285	4.03516	1.39487	0.00318405	---	ENSRNOT00000080225
17601057	3.05467	4.32366	1.41542	0.00790468	---	---
17601391	3.05467	4.32366	1.41542	0.00790468	---	---
17795674	4.53527	6.42919	1.4176	0.0302045	Klra5	XM_008763341
17600181	3.06432	4.39061	1.43282	0.0480028	---	---
17726842	1.58868	2.3011	1.44844	0.00435601	LOC291543	ENSRNOT00000039569
17603305	3.19645	4.63023	1.44856	0.0177041	---	---
17612350	1.92418	2.81692	1.46396	0.0334128	---	ENSRNOT00000081154
17603845	2.72567	4.00572	1.46963	0.0110458	---	---
17739380	2.82006	4.16436	1.47669	0.0238527	Dchs2	XM_006224153
17880891	3.05108	4.61685	1.51319	0.0345259	Olr1146	XM_001075891
17851973	3.33896	5.09166	1.52492	0.0126293	---	ENSRNOT00000079343
17860606	2.94028	4.49103	1.52742	0.0329942	---	GENSCAN00000058984
17774274	2.82285	4.39813	1.55805	0.0381198	---	NM_001000638
17615905	2.92434	4.58935	1.56936	0.0260278	Klk7	NM_001106254
17763461	3.0727	4.85606	1.58039	0.000751801	Mir3590	NR_037388
17609265	2.9053	4.59468	1.58148	0.00629825	---	---
17700702	2.37566	3.77817	1.59037	0.0350852	---	ENSRNOT00000063238
17859862	4.42935	7.0933	1.60143	0.0233868	---	ENSRNOT00000091608
17652949	2.42011	3.88741	1.60629	0.0109027	---	ENSRNOT00000084995
17603983	2.90225	4.68176	1.61315	0.000578342	---	---
17816457	1.6849	2.72512	1.61737	0.0289502	---	---
17762604	1.89439	3.10708	1.64015	0.0403457	---	ENSRNOT00000069354
17607699	2.63991	4.41512	1.67245	0.0191157	---	---
17609117	2.63991	4.41512	1.67245	0.0191157	---	---
17600145	2.1953	3.72051	1.69476	0.0240238	---	---
17607561	2.64877	4.50742	1.70171	0.020833	---	---
17608979	2.64877	4.50742	1.70171	0.020833	---	---
17606303	2.20769	3.82763	1.73377	0.0134195	---	---
17711336	1.72225	3.07432	1.78506	0.0424683	---	ENSRNOT00000079673
17601805	1.41745	2.58113	1.82096	0.00443907	---	---
17805652	1.54837	3.01336	1.94615	0.0419471	---	ENSRNOT00000054592
17882981	1.54837	3.01336	1.94615	0.0419471	---	ENSRNOT00000054592
17692790	2.16769	4.23844	1.95528	0.000677298	---	NONRATT019077
17791912	1.54424	3.10307	2.00945	0.0433261	---	---
17601631	1.5302	3.09742	2.02419	0.0270058	---	---
17601205	1.56501	3.28792	2.10089	0.0233902	---	---
17601539	1.56501	3.28792	2.10089	0.0233902	---	---
17604063	1.87744	4.12747	2.19846	0.00520204	---	---
17871032	1.32694	3.1101	2.34382	0.00944338	---	ENSRNOT00000078465
17605441	1.03429	2.43513	2.3544	0.0432823	---	---
17670276	1.04825	2.637	2.51563	0.0476543	---	ENSRNOT00000084380
17606369	1.14864	3.12318	2.71903	0.0307933	---	---
17605083	1.37635	3.88291	2.82115	0.0306798	---	---
17600925	1.07128	3.38135	3.15637	0.0123278	---	---
17601245	1.07128	3.38135	3.15637	0.0123278	---	---
17601259	1.07128	3.38135	3.15637	0.0123278	---	---
17606661	1.04326	3.33276	3.19457	0.0330209	---	---
17606707	1.02634	4.16286	4.05603	0.032162	---	---
17604595	0.609056	2.60288	4.27363	0.0337028	---	---
17676824	0.402618	2.09202	5.19605	0.00938174	---	---
17603209	0.327732	2.07839	6.34174	0.0109638	---	---
17608155	0.230493	2.22819	9.66707	0.0046194	---	---
17711913	0.174809	1.86229	10.6533	0.0204454	---	ENSRNOT00000085656
17606905	0.102718	2.33723	22.7538	0.0462445	---	---
17635711	0.0945252	2.34389	24.7965	0.0205308	Olr167	NM_001000173
17783459	0.000273949	1.45156	5298.65	0.0250674	---	ENSRNOT00000079803

## Sheet: male BPA50 vs Control male
Probe_ID	Male Control, MC (avg exp)	male BPA50, mBPA50 (avg exp)	mBPA50 vs MC (fold change)	mBPA50 vs MC (adj p-value)	Gene Symbol	mRNA Accession
17825844	1.81205	0.0767345	-23.6146	0.045854	---	GENSCAN00000053921
17843266	2.44624	0.225219	-10.8616	0.0263653	Olr1225	NM_001001083
17607325	3.04406	0.352059	-8.64646	0.0195461	---	---
17818435	1.7341	0.220283	-7.87216	0.0420796	Mir370	NR_032113
17829982	2.80187	0.357582	-7.8356	0.00713415	---	ENSRNOT00000082395
17601667	2.6975	0.406148	-6.64167	0.00872227	---	---
17601805	1.41745	0.222503	-6.37051	0.00863395	---	---
17774346	2.79235	0.445894	-6.26237	0.0156449	Olr704	NM_001000626
17606385	1.7254	0.283979	-6.07579	0.0211824	---	---
17843900	2.95301	0.511846	-5.76934	0.000341822	Snorna	ENSRNOT00000081352
17723744	2.41431	0.437323	-5.52065	0.0258163	---	---
17833200	2.27025	0.473977	-4.78979	0.040943	Olr943	NM_001001368
17837062	2.38412	0.49829	-4.7846	0.0252927	---	---
17619399	2.68662	0.561736	-4.78271	0.0163484	Olr235	NM_001000209
17774166	3.5111	0.762328	-4.60576	0.00547154	Olr520	NM_001000930
17873622	2.21799	0.482788	-4.59414	0.0211049	LOC100363993	XM_008773370
17726211	2.89751	0.665492	-4.35394	0.00991438	---	ENSRNOT00000081911
17815734	2.89009	0.725027	-3.98619	0.0178729	---	ENSRNOT00000091425
17700872	1.84101	0.466996	-3.94224	0.0052797	---	ENSRNOT00000089058
17844810	2.36083	0.651154	-3.62562	0.0276386	---	ENSRNOT00000077769
17606469	3.35218	1.03924	-3.2256	0.0217554	---	---
17603199	4.74818	1.50021	-3.16501	0.0190139	---	---
17876564	3.25987	1.19939	-2.71793	0.0432874	Trpc5os	XM_006227496
17604871	3.58937	1.37132	-2.61745	0.0490111	---	---
17797969	2.05926	0.787603	-2.61459	0.0169581	---	ENSRNOT00000078759
17834483	3.17483	1.21901	-2.60442	0.00547107	LOC103692807	XR_593336
17723022	2.85076	1.10648	-2.57643	0.0019324	Snorna	ENSRNOT00000091214
17774957	3.24501	1.30294	-2.49054	0.0290978	---	ENSRNOT00000086826
17690132	2.06629	0.862109	-2.39678	0.0373433	---	ENSRNOT00000052489
17711303	2.96765	1.30443	-2.27506	0.0121883	---	ENSRNOT00000063634
17747677	3.1987	1.4325	-2.23295	0.0335227	---	GENSCAN00000028042
17606523	1.85323	0.83952	-2.20749	0.0286135	---	---
17822060	1.60475	0.728242	-2.2036	0.021831	---	---
17604555	4.33491	1.96956	-2.20096	0.00353377	Bcap31	---
17676821	2.48568	1.19629	-2.07782	0.00342084	---	XM_002727483
17854082	2.29855	1.10815	-2.07422	0.00990222	---	ENSRNOT00000088994
17713758	1.95864	1.06042	-1.84704	0.0232191	---	ENSRNOT00000085604
17734970	5.01299	2.72159	-1.84194	0.0124566	---	---
17882901	5.01299	2.72159	-1.84194	0.0124566	---	---
17785186	3.13484	1.70355	-1.84017	0.0364047	---	ENSRNOT00000089976
17814060	3.36134	1.83411	-1.83268	0.0294817	---	GENSCAN00000041783
17602233	4.18753	2.33081	-1.7966	0.04025	---	---
17823578	3.0779	1.71469	-1.79502	0.0240205	---	ENSRNOT00000054608
17651336	3.64793	2.04658	-1.78245	0.0398126	---	ENSRNOT00000077603
17744446	3.60459	2.02838	-1.77707	0.0376348	---	ENSRNOT00000063717
17739238	3.81273	2.1486	-1.77452	0.0209358	---	GENSCAN00000049206
17769411	1.59622	0.904804	-1.76416	0.039577	---	---
17685893	3.956	2.25388	-1.7552	0.00217354	miRNA	ENSRNOT00000063325
17845008	4.03358	2.30884	-1.74702	0.0369935	Megf11	XM_006226431
17664252	1.69293	0.972495	-1.74081	0.0407854	---	---
17647314	2.9996	1.73253	-1.73135	0.0121197	---	ENSRNOT00000085369
17714626	3.05175	1.78012	-1.71436	0.0311863	---	ENSRNOT00000063760
17833196	3.21228	1.88688	-1.70243	0.0143639	---	NM_001001367
17601715	2.5256	1.49532	-1.689	0.0173497	---	---
17774019	3.4744	2.07561	-1.67392	0.0316054	Mir130a	NR_031876
17694280	3.76018	2.24934	-1.67168	0.0143831	---	---
17867464	3.8273	2.29347	-1.66878	0.0384924	Cesl1	NM_001024365
17605533	3.11817	1.874	-1.66391	0.0363017	---	---
17841990	3.68687	2.22067	-1.66025	0.0366707	---	---
17763974	3.79256	2.28493	-1.65982	0.0173607	---	ENSRNOT00000091926
17813508	3.46766	2.09622	-1.65425	0.007148	---	ENSRNOT00000087435
17613328	3.49104	2.11256	-1.65252	0.0262936	Vom1r51	NM_001008933
17774365	3.93173	2.3906	-1.64466	0.0370276	Olr715	NM_001000623
17747758	4.18791	2.55275	-1.64055	0.000485987	Vom2r47	NM_001099506
17619160	3.98304	2.4456	-1.62866	0.0463063	Olr152	NM_001000546
17667435	2.66277	1.64074	-1.62291	0.0417883	---	ENSRNOT00000090829
17605027	3.39944	2.10817	-1.61251	0.0455823	---	---
17606989	4.04029	2.52721	-1.59871	0.041612	---	---
17619140	4.37796	2.74752	-1.59342	0.00485857	Olr143	NM_001000163
17815143	3.85502	2.43307	-1.58442	0.0450108	---	ENSRNOT00000063587
17734588	3.93807	2.50021	-1.5751	0.0369048	---	ENSRNOT00000091947
17723355	4.62491	2.94231	-1.57187	0.0211502	Megf10	NM_001100657
17851238	3.58385	2.28347	-1.56948	0.0368971	Olr1274	NM_001000801
17827953	3.7853	2.42983	-1.55784	0.0220045	Rsrc1	ENSRNOT00000030321
17817925	4.42636	2.84207	-1.55744	0.033492	---	ENSRNOT00000078253
17862543	3.05167	1.96408	-1.55374	0.0351285	---	ENSRNOT00000080718
17684809	2.9921	1.94049	-1.54193	0.0220014	Cfh	BC089845
17604119	4.68154	3.05584	-1.532	0.0332	---	---
17810059	2.39948	1.56738	-1.53089	0.031519	Olr867	NM_001000412
17635995	3.80176	2.49512	-1.52368	0.00166173	Olr262	NM_001000221
17702325	3.09875	2.04578	-1.5147	0.0403293	---	ENSRNOT00000060386
17817740	3.57685	2.37053	-1.50888	0.0455896	---	ENSRNOT00000053416
17683488	3.72207	2.46707	-1.5087	0.023714	Serpinb3	NM_001008887
17704845	2.3576	1.56318	-1.5082	0.0289433	---	ENSRNOT00000088841
17612547	3.05493	2.04412	-1.4945	0.00853104	---	GENSCAN00000038835
17787479	2.32268	1.55535	-1.49335	0.0349136	LOC103692234	XM_008763347
17837103	3.87829	2.60417	-1.48926	0.0232295	---	---
17740670	4.45347	2.9923	-1.48831	0.0164014	Celf3	NM_001109190
17621542	4.80586	3.24314	-1.48186	0.0130101	RGD1559891	XM_001053430
17720221	4.58738	3.0985	-1.48052	0.00731241	---	---
17607021	4.25737	2.88572	-1.47533	0.00604873	---	---
17676941	3.36708	2.28699	-1.47228	0.040694	---	ENSRNOT00000082811
17641707	3.09096	2.10093	-1.47124	0.0333928	---	ENSRNOT00000089137
17827065	4.18711	2.84781	-1.47029	0.0376296	---	---
17780832	4.65227	3.1789	-1.46349	0.0414467	Fbxl13	NM_001103355
17782909	3.77457	2.58727	-1.4589	0.00276853	Prss1	NM_012635
17866738	4.4606	3.0632	-1.45619	0.0223277	---	NONRATT058390
17646237	3.87805	2.66333	-1.45609	0.0202776	Olr1459	NM_001000770
17792439	3.7316	2.57701	-1.44804	0.0238355	---	---
17879577	3.85828	2.68415	-1.43743	0.0474782	LOC688842	XM_001068529
17824722	4.25685	2.97352	-1.43159	0.00916158	---	GENSCAN00000049819
17602875	3.73618	2.61387	-1.42937	0.000968227	Vps28	---
17698547	2.71862	1.9022	-1.4292	0.0255145	---	---
17619058	4.33544	3.03385	-1.42902	0.0235117	---	ENSRNOT00000084931
17751906	3.02337	2.11607	-1.42877	0.00403783	snRNA	ENSRNOT00000080827
17808299	2.62499	1.84693	-1.42128	0.0297629	---	ENSRNOT00000063530
17862393	4.07417	2.87014	-1.4195	0.0422986	---	NONRATT057420
17708214	3.61299	2.54792	-1.41801	0.0194565	---	ENSRNOT00000086846
17614898	1.97362	1.39592	-1.41385	0.00713797	---	---
17642742	3.94159	2.79257	-1.41146	0.0236293	Cfap43	XM_006231588
17656503	3.63444	2.57536	-1.41124	0.00692783	Eno1	ENSRNOT00000002064
17671409	3.5512	2.51869	-1.40994	0.0266963	---	---
17736435	3.3699	2.39786	-1.40538	0.0369081	---	---
17843069	5.4219	3.86607	-1.40243	0.00127753	LOC100360143	XM_002729890
17850020	3.50082	2.5058	-1.39709	0.0492056	---	ENSRNOT00000080890
17858567	3.56715	2.56368	-1.39142	1.48281e-05	Lyg2	ENSRNOT00000069857
17795703	2.78532	2.00249	-1.39093	0.0427146	---	ENSRNOT00000083483
17690109	3.54941	2.55612	-1.3886	0.0302277	---	ENSRNOT00000088663
17607905	4.55351	3.29061	-1.38379	0.0147012	---	---
17604027	4.67504	3.38462	-1.38126	0.0263182	---	---
17725233	4.3681	3.18312	-1.37227	0.00654414	---	GENSCAN00000034589
17604585	3.28145	2.39291	-1.37132	0.0451494	---	---
17692643	4.39255	3.20478	-1.37063	0.00350388	Ephx4	NM_001105994
17844192	4.66737	3.40557	-1.37051	0.0238832	Slc35f2	NM_001106822
17818619	3.88344	2.8405	-1.36717	0.000300265	Snorna	ENSRNOT00000080249
17818635	3.88344	2.8405	-1.36717	0.000300265	Snorna	ENSRNOT00000080249
17841800	2.47755	1.81221	-1.36715	0.0466198	---	ENSRNOT00000086369
17796852	5.05603	3.70177	-1.36584	0.0384564	Cpa6	NM_001107900
17711322	4.57745	3.35598	-1.36397	0.00508911	Spock3	NM_001107310
17683532	4.22617	3.10384	-1.36159	0.0390844	---	ENSRNOT00000089317
17725373	4.09813	3.0249	-1.3548	0.00864338	---	GENSCAN00000033601
17876806	3.74904	2.77232	-1.35231	0.047208	---	ENSRNOT00000088136
17797996	2.4494	1.81139	-1.35222	0.00644774	---	---
17739301	3.41522	2.52655	-1.35173	0.0394284	---	ENSRNOT00000082104
17876893	3.38108	2.50334	-1.35063	0.0177975	LOC685789	XM_006227313
17863328	3.85931	2.86578	-1.34669	0.0189795	---	ENSRNOT00000070299
17774158	3.45003	2.56244	-1.34638	0.0197696	Olr510	NM_001000312
17632004	4.23959	3.15326	-1.34451	0.0379406	---	ENSRNOT00000083816
17685238	4.37467	3.25543	-1.34381	0.0429043	Lamc2	NM_001100640
17604843	4.2655	3.18029	-1.34123	0.0142081	---	---
17761767	4.52371	3.37494	-1.34038	0.0293129	Olr402	NM_001001014
17662073	4.13304	3.08608	-1.33925	0.0289741	Spata32	NM_001005531
17621989	4.0375	3.01991	-1.33696	0.0223676	Olr302	NM_001000238
17877950	4.64743	3.47854	-1.33603	0.0162911	LOC100360790	XM_003752067
17664501	4.1848	3.13353	-1.33549	0.00887307	LOC100363287	XM_002727853
17763603	4.10475	3.07399	-1.33532	0.0384956	Olr472	NM_001000301
17819105	3.21301	2.41	-1.3332	0.0120138	Mir203	NR_031918
17653930	4.69404	3.52795	-1.33053	0.0446678	LOC100361104	XM_002727701
17698064	4.6845	3.52363	-1.32945	0.0257659	Olr1614	NM_001000841
17633915	5.17879	3.904	-1.32653	0.00437378	---	---
17781280	4.50438	3.39986	-1.32487	0.0233984	LOC103692071	XM_008762749
17666905	4.91081	3.71044	-1.32351	0.0396696	Olr1568	NM_001000532
17628980	4.06448	3.07201	-1.32307	0.0213254	Mir3596c	NR_037379
17755592	4.9992	3.7804	-1.3224	0.00561455	Ak9	XM_003753496
17616908	2.53972	1.92177	-1.32155	0.0405431	---	---
17661160	4.46945	3.38629	-1.31986	0.0184151	Krtap4-3	XM_001081433
17778304	4.39691	3.33689	-1.31766	0.00672641	Nrsn2	NM_001109561
17748743	4.26799	3.24401	-1.31565	0.0440468	---	ENSRNOT00000079276
17635699	4.23857	3.22592	-1.31391	0.0295067	---	GENSCAN00000000752
17805450	5.17616	3.93972	-1.31384	0.0104787	RGD1561849	NM_001109260
17607219	4.04534	3.08685	-1.31051	0.0324586	---	---
17618330	4.00336	3.0554	-1.31026	0.0101195	Tenm4	NM_001191628
17711174	5.34847	4.0825	-1.3101	0.0314772	---	GENSCAN00000004174
17602041	5.23201	4.00234	-1.30724	0.000883783	---	---
17854084	4.56745	3.49687	-1.30615	0.0469651	Mlip	XM_008757820
17625072	4.15405	3.19861	-1.2987	0.0498867	Lipk	NM_001106374
17849469	4.08135	3.14365	-1.29828	0.0456969	---	GENSCAN00000010864
17843788	4.62405	3.5649	-1.29711	0.0290285	Dscaml1	NM_001108141
17712348	4.14432	3.20063	-1.29485	0.000936371	snRNA	ENSRNOT00000079003
17668365	3.97008	3.06668	-1.29459	0.000951851	---	GENSCAN00000038824
17784189	7.70048	5.96372	-1.29122	0.0457892	LOC103690612	XM_008758116
17728171	4.20337	3.25604	-1.29095	0.00422013	Ces1	ENSRNOT00000020775
17787423	4.74784	3.67903	-1.29051	0.0447703	Fgf6	NM_131908
17666502	3.15648	2.44807	-1.28938	0.04278	---	GENSCAN00000035165
17603621	4.60799	3.57886	-1.28756	0.0353769	---	---
17607067	5.36121	4.16479	-1.28727	0.0247834	---	---
17774367	4.87254	3.78577	-1.28707	0.0356094	Olr716	NM_001000622
17606587	4.75016	3.69578	-1.28529	0.0145411	---	---
17602021	4.07001	3.17446	-1.28211	0.0373722	---	---
17669992	4.70213	3.66975	-1.28132	0.0241132	Ostn	NM_207612
17600743	3.97748	3.10595	-1.2806	0.0315109	---	---
17716278	3.85379	3.02322	-1.27473	0.00520479	---	GENSCAN00000057733
17703989	5.3203	4.17881	-1.27316	0.04959	---	---
17661024	4.23376	3.32548	-1.27313	0.0383992	Krt39	NM_001004130
17713941	4.27468	3.35803	-1.27297	0.0207662	Ctsr	NM_175581
17699518	4.64996	3.65322	-1.27284	0.0197725	Defb43	NM_001037528
17641643	4.46941	3.51775	-1.27053	0.0431409	LOC100360690	XM_006223720
17694311	5.15815	4.0609	-1.2702	0.0325146	Grxcr1	NM_001191935
17723509	4.47366	3.524	-1.26948	0.00227927	---	---
17879065	3.22965	2.54408	-1.26948	0.036739	---	ENSRNOT00000078611
17758185	4.21785	3.32334	-1.26916	0.0129413	---	GENSCAN00000008334
17834095	5.14955	4.06289	-1.26746	0.0490008	Slc1a6	XM_008765182
17680226	5.00602	3.95247	-1.26655	0.00895732	Fmod	NM_080698
17881783	3.56457	2.81553	-1.26604	0.0114252	---	NR_032771
17750124	4.9551	3.91753	-1.26485	0.0387771	---	ENSRNOT00000086252
17856700	4.73392	3.74636	-1.26361	0.00395467	Cdcp1	NM_001106869
17653468	4.25941	3.37357	-1.26258	0.00995059	Pla2g10	NM_017176
17625868	4.28235	3.39242	-1.26233	0.0123695	Scd4	XM_001057317
17878660	2.57751	2.04199	-1.26225	0.0494675	---	ENSRNOT00000088990
17742929	3.89098	3.08283	-1.26215	0.025093	---	GENSCAN00000019329
17664442	3.54716	2.8114	-1.2617	0.0155254	---	ENSRNOT00000089032
17714735	3.72415	2.9566	-1.25961	0.0183031	LOC689569	XM_001071227
17697386	5.23765	4.15977	-1.25912	0.034338	---	---
17608591	4.89559	3.88814	-1.25911	0.0209946	---	---
17822064	4.06634	3.22957	-1.2591	0.00893488	---	---
17746331	3.65715	2.9053	-1.25879	0.0463546	---	GENSCAN00000039558
17698709	4.16949	3.31369	-1.25826	0.0316463	---	ENSRNOT00000068212
17881048	4.42613	3.51951	-1.2576	0.00565374	RGD1566387	XM_006227517
17706617	3.93306	3.12763	-1.25752	0.0234998	Lrit1	NM_139331
17844933	4.45157	3.54415	-1.25603	0.0220656	---	ENSRNOT00000083313
17659273	4.14669	3.3029	-1.25547	0.0410006	---	NONRATT011684
17602155	5.62821	4.49105	-1.25321	0.0490429	---	---
17785915	4.45141	3.56256	-1.2495	0.0346135	Cav3	NM_019155
17619206	4.27653	3.42283	-1.24941	0.0499115	Olr188	NM_001001032
17816092	4.18306	3.35659	-1.24622	0.0354814	---	ENSRNOT00000077468
17680680	4.98163	4.00979	-1.24237	0.0382761	Kcnt2	NM_198762
17769733	4.08295	3.28821	-1.24169	0.0493315	RGD1564340	NM_001134620
17659925	4.53054	3.64911	-1.24155	0.0343612	RGD1561118	ENSRNOT00000040561
17774397	3.91099	3.15451	-1.23981	0.0256186	Olr744	NM_001000577
17877407	3.43183	2.77376	-1.23725	0.040014	---	GENSCAN00000055465
17777847	5.19115	4.19749	-1.23673	0.0199357	Ovol2	NM_001106519
17880833	4.47545	3.6197	-1.23641	0.0428989	---	---
17635717	4.23046	3.42195	-1.23627	0.0111089	Olr174	NM_001001028
17635645	4.14295	3.35204	-1.23595	0.0488646	Olr142	NM_001000544
17693874	4.49966	3.64381	-1.23488	0.0205471	---	ENSRNOT00000083534
17773368	4.65989	3.77495	-1.23442	0.00447448	Pde11a	NM_001127480
17813583	3.43518	2.7838	-1.23399	0.0243278	---	ENSRNOT00000088494
17673477	4.69497	3.81048	-1.23212	0.0125322	---	ENSRNOT00000048690
17805606	4.19456	3.40457	-1.23204	0.0391892	---	ENSRNOT00000085093
17864432	4.23053	3.43423	-1.23187	0.0485729	---	ENSRNOT00000089795
17734564	3.30733	2.68913	-1.22989	0.0313956	---	---
17633541	3.82793	3.11392	-1.2293	0.0455331	---	ENSRNOT00000083021
17720059	3.48116	2.83185	-1.22929	0.0298219	---	ENSRNOT00000069761
17849397	3.91521	3.18631	-1.22876	0.0314255	Mmp1b	XM_008765897
17635588	4.94451	4.02526	-1.22837	0.012066	Olr121	NM_001000155
17832714	3.75861	3.06003	-1.22829	0.0340781	Hoxc10	NM_001308636
17789535	5.06761	4.1326	-1.22625	0.0350784	---	---
17664233	4.16589	3.40495	-1.22348	0.0115008	---	GENSCAN00000019294
17821313	4.18307	3.42092	-1.22279	0.0200895	---	ENSRNOT00000082373
17873625	3.66054	3.00126	-1.21967	0.0244461	Ube2d4l1	ENSRNOT00000045603
17602687	4.5459	3.72875	-1.21915	0.025647	---	---
17883207	6.39885	5.25226	-1.2183	0.00484181	---	ENSRNOT00000051008
17880744	5.46237	4.49558	-1.21505	0.018947	Rnf223	XM_003750095
17769349	3.15739	2.60003	-1.21437	0.00414516	snRNA	ENSRNOT00000083648
17860356	4.78754	3.94242	-1.21436	0.029	Catip	XM_001074457
17810079	5.35527	4.41156	-1.21392	0.030667	---	---
17661316	4.73199	3.89994	-1.21335	0.0467596	Hap1	NM_024133
17725135	3.25799	2.68672	-1.21263	0.0264462	Nol4	NM_001107401
17645289	4.3495	3.58768	-1.21234	0.00841606	LOC100360106	XR_146179
17830322	3.81036	3.14814	-1.21036	0.0466786	---	ENSRNOT00000088464
17649499	4.75387	3.93454	-1.20824	0.0240331	Unc45b	NM_001107028
17775285	3.88215	3.21321	-1.20819	0.00352102	Olr747	NM_001001068
17774270	5.13632	4.25367	-1.2075	0.00145596	Olr650	NM_001000639
17746903	3.99346	3.30835	-1.20709	0.0498694	Ccdc144b	XM_006224102
17798630	4.33936	3.59505	-1.20704	0.0332059	Foxe1	NM_138909
17822243	4.87486	4.03893	-1.20697	0.025143	---	ENSRNOT00000005511
17760219	4.07408	3.37699	-1.20642	0.0246113	LOC102547882	XM_008761630
17606277	5.33514	4.42671	-1.20522	0.00370444	Eif4h	---
17881130	4.17342	3.46443	-1.20465	0.0443268	---	---
17822287	3.79491	3.15064	-1.20449	0.0465971	---	ENSRNOT00000034507
17818647	2.7868	2.31388	-1.20438	0.0330153	Mir379	NR_032124
17689096	3.49766	2.9046	-1.20418	0.0128561	RGD1559459	XM_003751344
17642308	5.27403	4.38315	-1.20325	0.0448068	Ankrd2	NM_001107589
17649863	4.71741	3.92092	-1.20314	0.00865366	Tbx4	NM_001107034
17754267	4.37453	3.6367	-1.20288	0.00472507	Krtap10-7	NM_001109593
17606511	4.76418	3.96143	-1.20264	0.0312403	---	---
17864675	5.42907	4.52115	-1.20082	0.0106027	Rftn2	XM_001066941
17842211	3.91249	3.25973	-1.20025	0.00483137	Olr1124	NM_001000426
17880542	5.91875	4.93223	-1.20001	0.0300952	LOC100363449	XM_008761278
17862605	4.00099	3.33658	-1.19913	0.0104271	---	---
17726740	3.77497	3.15484	-1.19657	0.0347993	---	---
17876393	4.44138	3.71324	-1.19609	0.0345888	Mir3560	NR_037342
17790019	4.92697	4.12217	-1.19524	0.0395184	---	---
17671298	4.91402	4.11242	-1.19492	6.52916e-05	Pcp2	NM_001107116
17666024	4.11963	3.44908	-1.19441	0.00132982	snRNA	ENSRNOT00000086753
17732247	5.30911	4.44715	-1.19382	0.0491945	---	---
17658475	5.08947	4.26391	-1.19362	0.0103238	Olr1470	NM_001000723
17882519	4.47776	3.75377	-1.19287	0.0291736	---	XM_001060057
17674977	4.33281	3.63338	-1.1925	0.0165242	---	---
17818631	4.45447	3.73603	-1.1923	0.0381239	---	ENSRNOT00000079934
17818639	4.45447	3.73603	-1.1923	0.0381239	---	ENSRNOT00000081392
17619110	4.75105	3.98662	-1.19175	0.0402325	Olr110	NM_001000743
17606215	4.64004	3.89526	-1.1912	0.0187488	---	---
17645664	4.70298	3.95136	-1.19022	0.0360413	---	ENSRNOT00000082608
17818137	5.92583	4.97975	-1.18999	0.00478049	LOC299282	NM_182474
17812273	4.08916	3.43984	-1.18876	0.0197369	Pramef20	XM_001077012
17676538	4.61036	3.88146	-1.18779	0.0060664	Mir25	NR_031829
17734361	6.50292	5.47592	-1.18755	0.0145272	Acta1	NM_019212
17830074	5.45842	4.59734	-1.1873	0.0133228	Smpd5	NM_001304747
17613521	4.76753	4.01711	-1.18681	0.0317302	Cabp5	NM_001108907
17872249	3.70118	3.12387	-1.1848	0.0288141	Grpr	NM_012706
17752725	3.84254	3.24387	-1.18456	0.016557	RT1-CE10	NM_001008833
17624812	4.47034	3.77519	-1.18414	0.029886	Slc1a1	NM_013032
17854660	4.06307	3.43206	-1.18386	0.0339258	---	GENSCAN00000014350
17686822	3.98932	3.37133	-1.18331	0.0240154	---	---
17624792	4.89541	4.14093	-1.1822	0.00777521	Kcnv2	NM_001106370
17868099	6.39975	5.41552	-1.18174	0.0435074	---	---
17612141	4.84173	4.09846	-1.18135	0.0409225	---	---
17868867	4.40981	3.73301	-1.1813	0.00197688	Ces-like	NM_001013889
17797315	5.14726	4.36411	-1.17945	0.0485497	Cdh17	NM_053977
17840699	4.86084	4.12275	-1.17903	0.0359983	Olr1105	NM_001001078
17746977	5.11478	4.3446	-1.17727	0.0439184	Trpc3	NM_021771
17859795	4.99428	4.24296	-1.17707	0.0198937	Ctla4	NM_031674
17774861	4.43416	3.76759	-1.17692	0.00451741	Snorna	ENSRNOT00000077474
17625943	5.12906	4.36044	-1.17627	0.00306909	Sema4g	NM_001108526
17626408	4.7722	4.06107	-1.17511	0.0493713	---	ENSRNOT00000063723
17619333	3.44787	2.935	-1.17474	0.0122208	Olr230	NM_001000205
17629574	4.64384	3.95312	-1.17473	0.0108724	---	GENSCAN00000001294
17815837	4.43205	3.77509	-1.17402	0.0497878	---	GENSCAN00000051585
17862139	4.80443	4.09398	-1.17354	0.0365555	Lama1	NM_001108237
17718640	3.72853	3.17861	-1.17301	0.0415359	Mir3596d	NR_037338
17757572	4.67274	3.98483	-1.17263	0.023538	LOC689927	NM_001109555
17788736	3.9915	3.4065	-1.17173	0.0373295	---	---
17868049	4.68048	3.99792	-1.17073	0.0267202	---	---
17605339	5.334	4.55739	-1.17041	0.00313298	Vps35l	---
17863238	4.48289	3.83289	-1.16958	0.0363304	---	ENSRNOT00000078679
17785898	4.77726	4.09378	-1.16695	0.0197656	---	ENSRNOT00000085023
[truncated: 902 more rows]
