# Supplementary material for: Extensive transcriptome sex-reversal later in life, after developmental low-dose bisphenol A exposure
Source: Research Square preprint supplement (doi:10.21203/rs.3.rs-2977026/v1), 2023-07-06
Supplement: Supplementary file 4 [file c4faeeba70cf02ae259a9aad.xlsx]

## Sheet: Sheet1
metabolitename	shortname	p-value Male	beta1 Male	beta1 Female	p-value Female
Large HDL cholesterol esters	LHDL-CE	0	-0.9535	-1.1955	0
Large HDL cholesterol	LHDL-Chol	0	-0.9463	-1.1837	0
Large HDL total concentration	LHDL-total	0	-0.9314	-1.1483	0
Medium HDL cholesterol (%)	MHDL-Chol (%)	0	-1.0676	-1.1367	0
Large HDL cholesterol este (%)rs	LHDL-CE (%)	0	-0.8667	-1.1319	0
Large HDL lipids	LHDL-lipids	0	-0.9503	-1.1303	0
Large HDL cholesterol (%)	LHDL-Chol (%)	0	-0.8188	-1.1293	0
Medium HDL cholesterol e (%)sters	MHDL-CE (%)	0	-1.0748	-1.1151	0
HDL-cholesterol	HDL-Chol	0	-0.8757	-1.107	0
Large HDL phospholipids	LHDL-PL	0	-0.9446	-1.1069	0
Large HDL free cholesterol	LHDL-free chol	0	-0.8944	-1.1037	0
Large LDL free cholesterol (%)	LLDL-free chol (%)	0	-1.1567	-1.0809	0
HDL diameter	HDL diam	0	-0.955	-1.0553	0
HDL2-cholesterol	HDL2-Chol	0	-0.9019	-1.0518	0
Polyunsaturated fatty acids (%)	PUFA (%)	0	-1.0748	-1.0466	0
Omega 6 fatty acids (%)	FAn6 (%)	0	-1.1409	-1.0459	0
Medium HDL cholesterol esters	MHDL-CE	0	-0.8501	-1.0367	0
Very-large HDL cholesterol esters	XLHDL-CE	0	-0.6481	-1.0206	0
Medium HDL cholesterol	MHDL-Chol	0	-0.8365	-1.0191	0
Very-large HDL phospholipids	XLHDL-PL	0	-0.7411	-1.0168	0
Very-large HDL cholesterol	XLHDL-Chol	0	-0.6324	-1.0029	0
Very-large HDL lipids	XLHDL-lipids	0	-0.6653	-0.9993	0
Very-large HDL total concentration	XLHDL-total	0	-0.6202	-0.967	0
Medium LDL free cholesterol (%)	MLDL-free chol (%)	0	-1.0785	-0.9411	0
Degree of FA unsaturation	UnSaturation	0	-0.8817	-0.8859	0
Medium HDL total concentration	LHDL-total	0	-0.7064	-0.876	0
Medium HDL free cholest (%)erol	MHDL-free chol (%)	0	-0.6342	-0.862	0
Medium HDL free cholesterol	MHDL-free chol	0	-0.6588	-0.8456	0
18:2, linoleic acid (%)	LA (%)	0	-0.9365	-0.8342	0
Very-large HDL phospholipids (%)	XLHDL-PL (%)	0	-0.8463	-0.8335	0
apolipoprotein A1	apoA1	0	-0.6344	-0.8307	0
Small HDL cholesterol (%)	SHDL-Chol (%)	0	-0.9388	-0.8213	0
Medium VLDL cholesterol esters (%)	MVLDL-CE (%)	0	-0.8448	-0.8065	0
Very small VLDL cholesterol esters (%)	XSVLDL-CE (%)	0	-0.8624	-0.777	0
Medium HDL lipids	MHDL-lipids	0	-0.6246	-0.7731	0
Medium VLDL cholesterol (%)	MVLDL-Chol (%)	0	-0.8006	-0.7616	0
Medium LDL phospholipids (%)	MLDL-PL (%)	0	-0.6624	-0.7597	0
Small VLDL phospholipids (%)	SVLDL-PL (%)	0	-0.8481	-0.7582	0
IDL free cholesterol (%)	IDL-free chol (%)	0	-0.7525	-0.7444	0
Small HDL cholesterol esters (%)	SHDL-CE (%)	0	-0.9006	-0.7406	0
Very small VLDL cholesterol (%)	XSVLDL-Chol (%)	0	-0.7634	-0.7198	0
Large LDL triglycerides	LLDL-TG	0	0.8934	0.6717	0
IDL triglycerides	IDL-TG	0	0.724	0.7093	0
IDL triglycerides (%)	IDL-TG (%)	0	0.91	0.7203	0
Medium HDL triglycerides	MHDL-TG	0	0.7992	0.7292	0
LDL-triglycerides	LDL-TG	0	1.0499	0.7316	0
Medium LDL triglycerides	MLDL-TG	0	1.1121	0.741	0
Leucine	Leucine	0	0.7537	0.7497	0
Very-large VLDL free cholesterol (%)	XVLDL-free chol (%)	0	0.8857	0.7511	0
Glucose	Glucose	0	0.9136	0.7655	0
Medium VLDL phospholipids	MVLDL-PL	0	0.7442	0.7718	0
Very small VLDL triglycerides (%)	XSVLDL-TG (%)	0	0.8496	0.7763	0
Medium VLDL free cholesterol	MVLDL-free chol	0	0.7842	0.7904	0
Monounsaturated fatty acids	MUFA	0	1.019	0.8001	0
Small LDL triglycerides	SLDL-TG	0	1.2117	0.8033	0
VLDL-cholesterol	VLDL-Chol	0	0.7922	0.8043	0
Medium VLDL lipids	MVLDL-lipids	0	0.8174	0.8309	0
Medium VLDL triglycerides (%)	MVLDL-TG (%)	0	0.8782	0.851	0
Medium VLDL total concentration	MVLDL-total	0	0.8641	0.8759	0
Medium LDL cholesterol esters (%)	MLDL-CE (%)	0	0.9076	0.9279	0
isoleucine	isoleucine	0	0.8824	0.9336	0
Large HDL triglycerides (%)	LHDL-TG (%)	0	1.0202	0.9473	0
Small VLDL lipids	SVLDL-lipids	0	0.7954	0.9501	0
Large VLDL free cholesterol (%)	LVLDL-free chol (%)	0	0.999	0.9586	0
Very small VLDL triglycerides	XSVLDL-TG	0	0.9013	0.9588	0
Glycoprotein acetyls	Glycoprot	0	1.0407	0.9619	0
Small VLDL total concentration	SVLDL-total	0	0.8514	0.9981	0
Very-large HDL triglycerides (%)	XLHDL-TG (%)	0	0.8657	1.0082	0
Very-large VLDL cholesterol esters	XVLDL-CE	0	1.0136	1.0104	0
apoB/apoA1-ratio	apoB/A1-ratio	0	0.8803	1.0117	0
VLDL diameter	VLDL diam	0	1.0601	1.0187	0
Medium HDL triglycerides (%)	MHDL-TG (%)	0	1.0401	1.0194	0
Large VLDL cholesterol esters	LVLDL-CE	0	0.9788	1.0237	0
Very-large VLDL cholesterol	XVLDL-Chol	0	1.0579	1.0278	0
Very-large VLDL free cholesterol	XVLDL-free chol	0	1.1033	1.0448	0
Very-large VLDL phospholipids	XVLDL-PL	0	1.0775	1.0466	0
Large VLDL cholesterol	LVLDL-Chol	0	1.032	1.0543	0
Serum triglycerides	S-TG	0	1.1317	1.0559	0
Monounsaturated fatty acids (%)	MUFA (%)	0	1.0752	1.0593	0
Very-large VLDL total concentration	XVLDL-total	0	1.1159	1.0599	0
Very-large VLDL lipids	XVLDL-lipids	0	1.1137	1.0621	0
Very-large VLDL triglycerides	XVLDL-TG	0	1.1338	1.065	0
Medium VLDL triglycerides	MVLDL-TG	0	1.0547	1.0664	0
Small HDL triglycerides	SHDL-TG	0	0.9996	1.0715	0
Large VLDL phospholipids	LVLDL-PL	0	1.0589	1.0725	0
Large VLDL total concentration	LVLDL-total	0	1.0826	1.0779	0
Medium HDL phospholipid (%)s	MHDL-PL (%)	0	0.9488	1.0787	0
Large VLDL triglycerides	LVLDL-TG	0	1.1099	1.0794	0
Large VLDL free cholesterol	LVLDL-free chol	0	1.0812	1.0795	0
Large VLDL lipids	LVLDL-lipids	0	1.0844	1.081	0
Small VLDL triglycerides	SVLDL-TG	0	1.004	1.0851	0
Small HDL triglycerides (%)	SHDL-TG (%)	0	0.9993	1.0885	0
VLDL-triglycerides	VLDL-TG	0	1.1158	1.1073	0
Triglyceride/Phosphoglyceride ratio	TG/PG-ratio	0	1.1579	1.1188	0
Saturated fatty acids	SFA	0	0.8937	0.6255	1e-25
LDL diameter	LDL diam	0	-0.898	-0.6004	1.61e-23
IDL cholesterol (%)	IDL-Chol (%)	0	-0.6963	-0.6321	1.9e-21
Total fatty ascids	FAs	0	0.8153	0.5735	2.16e-21
Very-large VLDL cholesterol esters (%)	XVLDL-CE (%)	0	-0.8032	-0.6831	2.74e-21
Small VLDL triglycerides (%)	SVLDL-TG (%)	0	0.7582	0.6155	7.5e-21
Small LDL triglycerides (%)	SLDL-TG (%)	0	0.9899	0.5964	1.09e-20
Very-large VLDL triglycerides (%)	XVLDL-TG (%)	0	0.7386	0.6268	3.3e-19
HDL-triglycerides	HDL-TG	0	0.7544	0.5501	7.66e-16
Very small VLDL free cholesterol (%)	XSVLDL-free chol (%)	0	0.8374	0.4863	1.11e-14
Large LDL triglycerides (%)	LLDL-TG (%)	0	0.794	0.4381	3.29e-11
Small LDL free cholesterol (%)	SLDL-free chol (%)	0	-0.896	-0.4417	1.54e-10
Medium LDL triglycerides (%)	MLDL-TG (%)	0	0.7516	0.2909	1.36e-05
Small LDL cholesterol (%)	SLDL-Chol (%)	0	-0.8108	-0.1059	0.09477
Very-large HDL free cholesterol (%)	XLHDL-free chol (%)	1e-25	0.6719	0.9355	0
Small VLDL cholesterol	SVLDL-Chol	2e-25	0.643	0.8446	0
Small VLDL free cholesterol	SVLDL-free chol	4e-25	0.6448	0.7938	0
Very-large VLDL phospholipids (%)	XVLDL-PL (%)	5e-25	-0.642	-0.5033	3.31e-12
Small VLDL cholesterol esters	SVLDL-CE	9e-25	0.6295	0.8681	0
Small VLDL free cholesterol (%)	SVLDL-free chol (%)	2.1e-24	-0.6051	-0.6527	2.53e-20
Very-large HDL free cholesterol	XLHDL-free chol	9.1e-24	-0.5514	-0.9117	0
Medium VLDL phospholipids (%)	MVLDL-PL (%)	5.39e-22	-0.593	-0.5033	1.18e-13
apolipoprotein B	apoB	1.63e-21	0.6186	0.6251	2.63e-22
Alanine	Alanine	1.23e-18	0.5697	0.5522	1.63e-16
IDL cholesterol esters (%)	IDL-CE (%)	1.48e-18	-0.5924	-0.482	4.79e-14
Small VLDL phospholipids	SVLDL-PL	2.22e-18	0.5526	0.7601	0
Small HDL free cholesterol (%)	SHDL-free chol (%)	6.81e-18	-0.5065	-0.6377	4.22e-23
Valine	Valine	3.77e-16	0.46	0.6118	9.87e-22
Small HDL phospholipids (%)	SHDL-PL (%)	4e-16	0.5247	0.3807	3.1e-09
Medium LDL cholesterol esters	MLDL-CE	4.28e-16	0.5153	0.5931	1.41e-19
Phenylalanine	Phenylala	7.94e-16	0.5188	0.3513	4.12e-08
Medium HDL phospholipids	MHDL-PL	2.63e-15	-0.4675	-0.584	4.91e-23
Large LDL phospholipids (%)	LLDL-PL (%)	3.83e-15	-0.4954	-0.5997	1.75e-20
Small LDL total concentration	SLDL-total	2.2e-14	0.5045	0.4228	5.21e-11
Large LDL cholesterol esters (%)	LLDL-CE (%)	2.48e-14	0.4749	0.5562	1.89e-18
Tyrosine	Tyrosine	6.01e-14	0.4753	0.3501	2.02e-07
Remnant cholesterol	Remnant-Chol	1.68e-13	0.4797	0.5578	1.03e-17
Saturated fatty acids (%)	SFA (%)	2.97e-13	0.4912	0.3713	9.38e-09
Very-large VLDL cholesterol (%)	XVLDL-Chol (%)	1.52e-12	-0.4401	-0.4072	1.41e-07
Very small VLDL free cholesterol	XSVLDL-free chol	2.41e-12	0.4566	0.5192	4.09e-16
Small LDL cholesterol esters	SLDL-CE	3.62e-12	0.4513	0.4448	9.36e-12
Small LDL phospholipids (%)	SLDL-PL (%)	6.27e-12	-0.3956	-0.7451	0
Medium LDL total concentration	MLDL-total	5.18e-11	0.4239	0.4932	6.72e-14
Large VLDL phospholipids (%)	LVLDL-PL (%)	1.79e-10	-0.3807	-0.287	9.02e-05
Omega 3 fatty acids	FAn3	3.56e-10	0.4088	0.1539	0.0185273
Lactate	Lactate	4.6e-10	0.3906	0.4489	4.33e-11
Small LDL lipids	SLDL-lipids	1.66e-09	0.399	0.3611	2.82e-08
Medium LDL lipids	MLDL-lipids	2.6e-09	0.386	0.4657	1.61e-12
IDL free cholesterol	IDL-free chol	9.63e-09	-0.3689	-0.1495	0.0221386
HDL3-cholesterol	HDL3-Chol	1.46e-08	-0.328	-0.9425	0
Large LDL cholesterol (%)	LLDL-Chol (%)	1.88e-08	-0.3624	-0.0312	0.638437
Glutamine	Glutamine	3.78e-08	-0.3668	-0.2052	0.0017237
Medium LDL cholesterol	MLDL-Chol	8.75e-08	0.3439	0.4568	5.89e-12
Small HDL phospholipids	SHDL-PL	1.2e-07	0.3417	0.2771	2.37e-05
Medium VLDL cholesterol	MVLDL-Chol	1.41e-07	0.3442	0.4767	5.26e-13
IDL cholesterol	IDL-Chol	2.23e-07	-0.3363	-0.1177	0.0740391
Very small VLDL total concentration	XSVLDL-total	2.5e-07	0.3363	0.4763	9.57e-14
Polyunsaturated fatty acids	PUFA	3.12e-07	0.342	0.1675	0.0084566
IDL cholesterol esters	IDL-CE	5.99e-07	-0.3245	-0.1089	0.0993768
Total phophoglycerides	Total PG	9.52e-07	0.3185	0.0403	0.513296
Small LDL phospholipids	SLDL-PL	1.02e-06	0.3272	0.2354	0.0002838
Medium LDL phospholipids	MLDL-PL	1.21e-06	0.3188	0.3847	5e-09
Large HDL free cholestero (%)l	LHDL-free chol (%)	1.92e-06	0.3532	-0.2703	2.6e-06
Very small VLDL lipids	XSVLDL-lipids	2.31e-06	0.3084	0.4624	4.96e-13
Small LDL cholesterol esters (%)	SLDL-CE (%)	3.89e-06	0.2712	0.4402	1.5e-12
Omega 6 fatty acids	FAn6	5.51e-06	0.3044	0.1626	0.0108488
22:6, Docosahexsaenoic acid	DHA	9.44e-06	0.2859	0.0655	0.321986
Large LDL free cholesterol	LLDL-free chol	9.68e-06	-0.2903	-0.0649	0.33041
Very small VLDL phospholipids	XSVLDL-PL	1.06e-05	0.2956	0.4742	3.07e-14
Small HDL cholesterol esters	SHDL-CE	1.69e-05	-0.2748	-0.2628	0.0001223
Small LDL cholesterol	SLDL-Chol	2.21e-05	0.2777	0.327	7.36e-07
IDL phospholipids	IDL-PL	2.44e-05	-0.2776	0.01	0.87667
Small VLDL cholesterol (%)	SVLDL-Chol (%)	3.42e-05	-0.2552	-0.0311	0.666732
18:2, linoleic acid	LA	4.24e-05	0.275	0.1506	0.019918
Small HDL cholesterol	SHDL-Chol	4.84e-05	-0.261	-0.259	0.0001323
Citrate	Citrate	4.97e-05	-0.2585	-0.2728	6.02e-05
22:6, Docosahexsaenoic acid (%)	DHA (%)	6.31e-05	-0.2505	-0.3637	1.47e-07
Large HDL phospholipids (%)	LHDL-PL (%)	6.64e-05	0.2712	0.9121	0
Phosphatidylcholine	PC	7.48e-05	0.2571	0.0143	0.817731
Very-large HDL cholesterol (%)	XLHDL-Chol (%)	7.83e-05	0.3141	0.1157	0.0461917
IDL lipids	IDL-lipids	0.0001224	-0.2513	-0.0169	0.795414
Medium LDL cholesterol (%)	MLDL-Chol (%)	0.000155	-0.2329	0.2105	0.0014765
Large VLDL cholesterol esters (%)	LVLDL-CE (%)	0.0003032	-0.2187	-0.02	0.790974
Small HDL lipids	SHDL-lipids	0.0006639	0.2183	0.1887	0.0049094
IDL total concentration	IDL-total	0.0008113	-0.2191	0.0132	0.839589
3-Hydroxybutyrate	Hydroxybut	0.0017405	-0.1849	-0.2879	0.0001066
Acetate	Acetate	0.0018284	-0.1954	-0.2894	2.01e-05
Total cholines	Cholines	0.0018436	0.1994	-0.056	0.367646
Large VLDL cholesterol (%)	LVLDL-Chol (%)	0.0082096	0.1603	0.3916	1.4e-07
IDL phospholipids (%)	IDL-PL (%)	0.0146204	-0.1647	0.1117	0.0878208
Large HDL triglycerides	LHDL-TG	0.022716	-0.141	-0.4313	8.31e-11
Medium VLDL free cholesterol (%)	MVLDL-free chol (%)	0.0780711	0.1061	0.0459	0.526123
Very-large HDL cholesterol este (%)rs	XLHDL-CE (%)	0.0900908	-0.1364	-0.4619	2.04e-14
Very small VLDL cholesterol esters	XSVLDL-CE	0.0923209	-0.1089	0.1149	0.0740953
Free cholesterol	Free Chol	0.108325	0.1064	0.0501	0.435713
LDL-cholesterol	LDL-Chol	0.119402	0.1017	0.2582	0.0001106
Very small VLDL phospholipids (%)	XSVLDL-PL (%)	0.138077	-0.0953	0.0334	0.630191
Medium VLDL cholesterol esters	MVLDL-CE	0.206883	0.0836	0.2885	1.19e-05
Omega 3 fatty acids (%)	FAn3 (%)	0.244076	-0.0732	-0.2558	0.0002222
Small HDL free cholesterol	SHDL-free chol	0.260848	-0.0719	-0.1755	0.0056958
Very-large HDL triglycerides	XLHDL-TG	0.276558	0.0683	-0.2974	4.29e-06
Large LDL phospholipids	LLDL-PL	0.291241	-0.0697	0.1007	0.128161
Sphymgomyelins	SM	0.311026	-0.0648	-0.1053	0.102628
Large LDL cholesterol esters	LLDL-CE	0.338324	0.0626	0.2419	0.0002969
Small LDL free cholesterol	SLDL-free chol	0.443788	0.0502	0.1714	0.0104139
Large VLDL triglycerides (%)	LVLDL-TG (%)	0.460585	0.0455	-0.2274	0.0020646
Large LDL total concentration	LLDL-total	0.47214	0.0473	0.2205	0.0008946
Very small VLDL cholesterol	XSVLDL-Chol	0.571887	0.0367	0.2231	0.0005256
Serum cholesterol	S-Chol	0.617562	0.0331	0.017	0.790797
Creatinine	Crea	0.632219	0.0254	0.0069	0.908719
Large LDL cholesterol	LLDL-Chol	0.643376	-0.0303	0.162	0.0154111
Medium LDL free cholesterol	MLDL-free chol	0.788503	-0.0176	0.1645	0.014136
Albumin	Albumin	0.847879	0.0121	-0.1041	0.130049
Small VLDL cholesterol esters (%)	SVLDL-CE (%)	0.871382	-0.01	0.3389	2.52e-06
Small HDL total concentration	SHDL-total	0.884116	0.0093	0.0102	0.882313
Acetoacetate	Acetoace	0.890847	-0.0085	-0.1141	0.1106
Esterified cholesterol	Ester Chol	0.906497	0.0078	0.0051	0.936123
Histidine	Histidine	0.939221	-0.0049	-0.0695	0.298424
Large LDL lipids	LLDL-lipids	0.94216	0.0048	0.1813	0.0063406
