# Supplementary material for: Extensive transcriptome sex-reversal later in life, after developmental low-dose bisphenol A exposure
Source: Research Square preprint supplement (doi:10.21203/rs.3.rs-2977026/v1), 2023-07-06
Supplement: Supplementary file 5 [file edbdc27fbd5b483cfef51326.xlsx]

## Sheet: female (BPA0.5+BPA50)
Probe_ID	Female Control, FC (avg exp)	Female BPA, fBPA(0.5+50) (avg exp)	fBPA(0.5+50) vs FC (fold change)	fBPA(0.5+50) vs FC (adj p-value)	Gene Symbol	mRNA Accession		x
17606647	0.893507	0.119978	-7.44725	0.0259139	---	---
17684692	0.888008	0.139927	-6.34621	0.0434636	---	ENSRNOT00000089596
17626893	2.06013	0.429517	-4.79638	0.00029433	Ces2i	XM_001074128
17777985	0.85909	0.214857	-3.99842	0.0376011	---	---
17601989	2.85553	0.960637	-2.97254	0.0070543	---	---
17607201	2.96082	1.06316	-2.78492	0.0370071	---	---
17601129	3.29588	1.22309	-2.69471	0.00868745	---	---
17601463	3.29588	1.22309	-2.69471	0.00868745	---	---
17736646	2.37454	1.02722	-2.31161	0.0473642	---	ENSRNOT00000070303
17724174	2.93432	1.364	-2.15126	0.0283545	---	ENSRNOT00000087981
17600941	3.69079	1.84424	-2.00126	0.0264844	---	---
17601275	3.69079	1.84424	-2.00126	0.0264844	---	---
17708049	2.58973	1.33915	-1.93387	0.011408	---	ENSRNOT00000063768
17851266	3.21269	1.77611	-1.80884	0.0423659	Olr1295	NM_001000598
17609183	3.24678	1.91322	-1.69703	0.0111966	---	---
17608649	3.09779	1.84409	-1.67985	0.0482003	---	---
17684952	2.27118	1.38542	-1.63935	0.0354988	---	ENSRNOT00000062587
17879069	3.07797	1.89355	-1.6255	0.0415366	---	ENSRNOT00000089249
17606469	3.86547	2.38851	-1.61836	0.0182383	---	---
17754684	2.53529	1.61908	-1.56588	0.047921	---	---
17606333	2.50445	1.63224	-1.53436	0.0208422	---	---
17606659	4.42474	2.92017	-1.51523	0.0350054	---	---
17791912	2.61137	1.73122	-1.5084	0.0367071	---	---
17723667	3.70524	2.47391	-1.49773	0.0296975	Mir3557	NR_037335
17607025	4.42568	2.97145	-1.4894	0.038652	---	---
17818447	2.75055	1.8628	-1.47656	0.0153931	---	ENSRNOT00000078011
17689278	2.45612	1.67225	-1.46875	0.0113123	---	ENSRNOT00000054495
17724855	3.25048	2.23201	-1.4563	0.026181	---	ENSRNOT00000078301
17727712	2.93617	2.04912	-1.43289	0.000230221	LOC100910721	XM_003751828
17608563	4.74483	3.34647	-1.41786	0.011166	---	---
17705163	3.4615	2.45453	-1.41025	0.0301699	---	ENSRNOT00000077540
17712292	3.54071	2.52202	-1.40392	0.00426888	---	ENSRNOT00000090682
17834450	3.46704	2.48229	-1.39671	0.0297498	Olr1096	NM_001000485
17604799	4.17888	3.02891	-1.37967	0.00146074	---	---
17789144	2.83455	2.06651	-1.37166	0.0320933	---	ENSRNOT00000087674
17800491	3.32479	2.44049	-1.36235	0.00859862	---	GENSCAN00000028827
17843235	3.71974	2.73545	-1.35982	0.0281363	Olr1203	NM_001001082
17601995	3.40956	2.54221	-1.34118	0.0214847	---	---
17842866	3.81956	2.85923	-1.33587	0.00827594	---	ENSRNOT00000078181
17824947	5.19867	3.95273	-1.31521	0.0219035	---	ENSRNOT00000048010
17717621	3.64231	2.79594	-1.30271	0.0413599	---	ENSRNOT00000077954
17607829	3.64526	2.81897	-1.29312	0.00221746	---	---
17607881	3.64526	2.81897	-1.29312	0.00221746	---	---
17879490	2.91289	2.26062	-1.28853	0.0422131	RGD1566008	XM_006257584
17608495	4.25778	3.31474	-1.2845	0.0373981	---	---
17637274	3.88475	3.04332	-1.27648	0.00807126	RGD1563217	NM_001109155
17613318	3.36277	2.65312	-1.26748	0.01706	Vom1r44	NM_001008902
17791704	3.39483	2.6812	-1.26616	0.0166528	---	ENSRNOT00000086788
17815732	2.82897	2.23645	-1.26494	0.0395523	---	ENSRNOT00000091748
17623958	4.31782	3.41645	-1.26383	0.00262865	---	---
17633780	3.89999	3.08806	-1.26292	0.0349791	LOC103691155	XM_008759570
17639986	3.8954	3.08459	-1.26286	0.0119043	Tex40	XM_006223630
17767085	4.41064	3.4945	-1.26216	0.00542733	Cst12	ENSRNOT00000006608
17742150	3.79985	3.01517	-1.26025	0.00137553	---	ENSRNOT00000078452
17766080	4.05214	3.22754	-1.25549	0.00457413	---	ENSRNOT00000079467
17650228	3.86149	3.08842	-1.25031	0.0472921	---	GENSCAN00000010450
17665384	3.08257	2.47144	-1.24728	0.0491062	---	---
17645017	3.0935	2.48334	-1.2457	0.0104356	Mir218-2	NR_031930
17699417	4.10019	3.29489	-1.24441	0.0170959	C1qtnf9	NM_001191891
17718732	3.14506	2.52833	-1.24393	0.0230404	---	GENSCAN00000054668
17737825	4.06304	3.26989	-1.24256	0.0140174	Sox2	XR_591019
17693277	2.9435	2.37257	-1.24064	0.0348943	LOC685667	XM_006227207
17612974	4.28027	3.45608	-1.23847	0.0146282	Vom1r37	NM_001008923
17602405	4.90171	3.96461	-1.23637	0.0416721	---	---
17608241	4.70715	3.81471	-1.23395	0.0264392	---	---
17760090	3.36301	2.73416	-1.23	0.0346224	LOC100359989	XM_002726069
17629867	3.01441	2.45091	-1.22991	0.0299101	Vom2r33	NM_001099497
17806938	4.07093	3.31195	-1.22917	0.010043	Olr833	NM_001000408
17832370	5.82845	4.76781	-1.22246	0.020497	---	---
17606887	4.69969	3.85047	-1.22055	0.0108759	---	---
17766023	4.69289	3.84875	-1.21933	0.0088633	LOC499886	NM_001024312
17883708	3.58575	2.94279	-1.21849	0.0426851	---	---
17728879	3.56876	2.93504	-1.21591	0.0036569	---	ENSRNOT00000080045
17619435	3.86046	3.17516	-1.21583	0.0291636	Olr276	NM_001000227
17654396	4.91473	4.06687	-1.20848	0.0132145	Dnase1l2	XM_001057412
17819850	3.6846	3.05112	-1.20762	0.0279384	---	ENSRNOT00000087571
17831021	4.08818	3.39358	-1.20468	0.0333152	RGD1306782	XM_006226169
17635673	4.49146	3.7311	-1.20379	0.0156196	Olr150	NM_001000739
17830066	4.51953	3.75514	-1.20356	0.0428416	Spatc1	NM_001115026
17612978	3.98757	3.31415	-1.2032	0.031844	Vom1r38	NM_001008964
17791554	4.05922	3.37796	-1.20168	0.0251108	Neurod6	NM_001109237
17605917	3.76262	3.13258	-1.20112	0.0137645	---	---
17835652	4.52298	3.76663	-1.2008	0.0154979	---	---
17601737	4.76363	3.97805	-1.19748	0.0215185	---	---
17666510	4.05791	3.3962	-1.19484	0.0310212	---	ENSRNOT00000054449
17857689	4.36301	3.65558	-1.19352	0.00338665	Znrd1-as1	NM_001109479
17713211	3.722	3.1191	-1.19329	0.046321	---	GENSCAN00000018948
17602023	4.73815	3.97783	-1.19114	0.0323828	---	---
17699751	4.45795	3.74382	-1.19075	0.0423515	Adra1a	NM_017191
17878238	3.97212	3.3392	-1.18954	0.0329069	---	ENSRNOT00000029030
17828539	3.1555	2.65299	-1.18941	0.0367814	---	---
17602047	4.75524	4.00128	-1.18843	0.0111041	---	---
17634523	4.96187	4.18811	-1.18475	0.0109198	---	---
17774325	3.96437	3.3579	-1.18061	0.0072564	Olr690	NM_001000569
17737285	3.96703	3.36045	-1.18051	0.0376694	---	---
17795801	4.1121	3.48399	-1.18028	0.0125568	Tas2r103	NM_001166690
17880505	3.89526	3.30679	-1.17796	0.0256133	RGD1565369	XM_001053809
17600391	5.23881	4.45077	-1.17706	0.0304528	---	---
17851355	4.49618	3.82357	-1.17591	0.00721629	RGD1560789	ENSRNOT00000035386
17651595	4.62068	3.93243	-1.17502	0.00307675	Higd1b	NM_001105844
17635729	3.26562	2.782	-1.17384	0.0492281	Olr183	NM_001000181
17794664	3.69703	3.14953	-1.17384	0.0428158	---	ENSRNOT00000078295
17775749	4.11249	3.50352	-1.17382	0.0350581	Ppp1r14d	NM_172011
17824049	4.06723	3.46846	-1.17263	0.0174179	Serpina1f	NM_001108054
17625488	4.17516	3.56113	-1.17242	0.0272828	LOC100361547	XM_008759635
17763689	3.74821	3.19922	-1.1716	0.0115058	Olr594	NM_001000657
17791813	2.33912	2.00003	-1.16954	0.0134757	---	---
17714898	4.43615	3.79366	-1.16936	0.0108438	---	---
17607521	4.40499	3.76823	-1.16898	0.0433102	---	---
17608939	4.40499	3.76823	-1.16898	0.0433102	---	---
17618059	4.98906	4.26968	-1.16849	0.0192648	---	---
17794815	5.56527	4.76539	-1.16785	0.0119754	Lrrc23	NM_001013165
17606417	4.53811	3.88838	-1.16709	0.0330958	---	---
17602013	5.28563	4.53206	-1.16628	0.0203744	---	---
17856378	4.15057	3.55964	-1.16601	0.0489077	Slc22a13	NM_001126285
17873738	5.13744	4.40833	-1.16539	0.00693493	---	---
17883644	4.22195	3.62415	-1.16495	0.00844062	---	---
17712678	4.05466	3.48152	-1.16462	0.0281528	Defb1	NM_031810
17850316	4.50767	3.87101	-1.16447	0.0294841	Ap1m2	NM_001108996
17782679	4.5973	3.94819	-1.16441	0.0133288	Tas2r137	NM_001025149
17818407	4.3157	3.70817	-1.16383	0.0105046	Mir433	NR_031954
17824855	8.30674	7.14408	-1.16274	0.00346479	LOC100359684	XM_008764999
17813354	4.75471	4.08954	-1.16265	0.0294206	Mir429	NR_031949
17609913	4.83644	4.16161	-1.16216	0.0292485	---	---
17608227	4.84417	4.17403	-1.16055	0.0232796	---	---
17797213	4.74584	4.09015	-1.16031	0.00198275	---	---
17863638	4.4585	3.8471	-1.15893	0.0214995	---	ENSRNOT00000077326
17608825	4.28789	3.704	-1.15764	0.0356737	---	---
17603577	5.55189	4.79723	-1.15731	0.00518828	---	---
17851369	3.44196	2.9787	-1.15553	0.0464145	Olr1335	NM_001000479
17634626	5.30737	4.59556	-1.15489	0.00978833	Cfap161	NM_001100581
17815439	3.7707	3.26622	-1.15445	0.0376259	Prps1l1	NM_001105678
17622566	4.78026	4.1452	-1.15321	0.00407029	---	ENSRNOT00000087467
17792677	4.90771	4.25747	-1.15273	0.0236283	Cd207	XM_002726425
17609439	5.72047	4.96398	-1.15239	0.0258822	---	---
17882261	5.3677	4.65818	-1.15232	0.0013581	---	XM_002724675
17829856	4.2456	3.68499	-1.15213	0.00471906	Mir3586	NR_037381
17606007	5.08659	4.41576	-1.15192	0.0222162	---	---
17808518	4.21377	3.65815	-1.15188	0.00643266	LOC103692403	XR_592584
17751213	4.24918	3.68912	-1.15182	0.0444131	---	NONRATT029449
17604545	4.7394	4.1163	-1.15137	0.0413028	---	---
17601721	5.10688	4.43651	-1.1511	0.00839444	---	---
17680423	5.13548	4.46291	-1.1507	0.0115902	---	NONRATT016430
17797244	3.76236	3.27086	-1.15026	0.0419693	---	GENSCAN00000052469
17840683	3.8617	3.35828	-1.1499	0.0351182	Olr1877	XM_006226253
17831711	5.7036	4.96099	-1.14969	0.0139718	---	---
17697622	4.47304	3.89176	-1.14936	0.00131132	Fam107a	NM_001025129
17685599	4.54776	3.95806	-1.14899	0.0125392	Axdnd1	XM_008762896
17624558	5.04985	4.3953	-1.14892	0.0171172	Trpm3	NM_001191562
17659365	4.92918	4.29044	-1.14887	0.00563879	Heatr9	XM_006220751
17767047	4.52826	3.94198	-1.14873	0.0023674	---	ENSRNOT00000066588
17633882	4.08785	3.5615	-1.14779	0.00360505	---	GENSCAN00000031039
17679373	4.49222	3.91741	-1.14673	0.0200809	---	---
17639613	4.46127	3.8927	-1.14606	0.0030548	Ovol1	NM_001107572
17686990	4.29205	3.74693	-1.14548	0.00790394	Mir350	NR_031794
17684944	4.69769	4.1027	-1.14502	0.0335457	---	ENSRNOT00000089834
17774283	3.50292	3.06308	-1.14359	0.0250112	Olr657	NM_001000343
17808538	4.12973	3.61308	-1.14299	0.0214102	Ifna16l1	XM_575856
17767091	4.59863	4.02541	-1.1424	0.043791	Cst8	NM_019258
17810194	5.25984	4.60426	-1.14239	0.0194531	Mir30e	NR_031840
17880901	3.80738	3.33299	-1.14233	0.01839	---	GENSCAN00000044451
17685238	4.67044	4.09115	-1.1416	0.0174495	Lamc2	NM_001100640
17792808	4.41122	3.86461	-1.14144	0.0406655	Cml2	NM_001173449
17785460	3.86189	3.38617	-1.14049	0.0373896	---	ENSRNOT00000082834
17700468	4.33607	3.80373	-1.13995	0.0347635	---	ENSRNOT00000087480
17728221	4.56248	4.00364	-1.13958	0.0415736	Ces1a	NM_001190375
17762178	4.98941	4.37866	-1.13948	0.00391441	RGD1564306	XM_001066066
17743049	4.50506	3.95415	-1.13932	0.012891	---	ENSRNOT00000084992
17842699	5.38123	4.72836	-1.13808	0.00404319	---	---
17609867	5.36902	4.71792	-1.13801	0.0142868	---	---
17806133	2.98264	2.62661	-1.13555	0.0392655	---	ENSRNOT00000082911
17878685	4.78827	4.2181	-1.13517	0.0462019	Nap1l3	NM_133402
17629290	4.94189	4.3541	-1.135	0.00666757	Mir290	NR_031937
17608863	4.90303	4.322	-1.13443	0.0489306	---	---
17738003	4.3942	3.87502	-1.13398	0.037163	Adad1	NM_001006977
17877456	4.46468	3.93767	-1.13384	0.0106046	Cldn34e	NM_001109415
17646399	5.0374	4.44562	-1.13312	0.0250026	Drc3	NM_001013857
17834496	5.00645	4.41854	-1.13306	0.00651113	RGD1566251	XM_008765268
17603965	5.39857	4.76548	-1.13285	0.0264539	---	---
17702253	7.49068	6.61497	-1.13238	0.0444531	---	---
17881771	4.78312	4.22499	-1.1321	0.00770373	---	---
17740475	5.14105	4.54227	-1.13182	0.019618	LOC102554691	XM_006232846
17600395	5.36669	4.74178	-1.13179	0.0187341	---	---
17881030	4.83046	4.26903	-1.13151	0.00489809	---	---
17754983	4.84119	4.27889	-1.13141	0.0103158	Pcbd1	NM_001007601
17703315	4.7653	4.2142	-1.13077	0.0461842	Gjb6	NM_053388
17738401	3.60949	3.19232	-1.13068	0.0263356	---	---
17764450	7.82762	6.92328	-1.13062	0.0139109	Pax6	NM_013001
17725991	5.55938	4.92352	-1.12915	0.0238393	Gpr151	NM_181633
17764518	4.97508	4.40732	-1.12882	0.000968974	Kcna4	NM_012971
17809798	4.70326	4.16756	-1.12854	0.0335993	Artn	NM_053397
17604173	4.9706	4.40527	-1.12833	0.0244038	---	---
17745976	5.41564	4.80079	-1.12807	0.029927	---	ENSRNOT00000085314
17607519	5.12921	4.5474	-1.12795	0.0361287	---	---
17608937	5.12921	4.5474	-1.12795	0.0361287	---	---
17774863	4.7868	4.24523	-1.12757	0.0101652	---	ENSRNOT00000080214
17609949	5.19179	4.60502	-1.12742	0.0393849	---	---
17710750	4.53971	4.02829	-1.12696	0.0409718	---	GENSCAN00000047978
17730018	4.37966	3.89242	-1.12517	0.0485484	Tat	NM_012668
17609909	5.07962	4.51638	-1.12471	0.00812253	---	---
17881435	4.93663	4.39024	-1.12446	0.0292017	---	NM_001127375
17881279	4.69612	4.179	-1.12374	0.0109434	---	RPTR-M10961-4
17676816	4.68395	4.16831	-1.12371	0.0429014	RGD1560262	XM_008758333
17606363	5.47793	4.87746	-1.12311	0.0071237	---	---
17653798	4.18415	3.7284	-1.12224	0.0280649	---	ENSRNOT00000081563
17830795	4.50035	4.01274	-1.12151	0.0127876	Fam83f	NM_001130502
17763083	5.20083	4.63849	-1.12123	0.0231855	Hoxd3	NM_001271038
17762220	4.52155	4.03339	-1.12103	0.0161453	---	ENSRNOT00000083238
17606729	5.55064	4.95531	-1.12014	0.0061694	---	---
17789270	4.97154	4.43912	-1.11994	0.039396	---	ENSRNOT00000091433
17696898	4.93535	4.40686	-1.11993	0.0223001	Dlg5	XM_003751423
17775289	4.27078	3.81419	-1.11971	0.0455348	Olr760	NM_001001069
17814334	5.5433	4.9566	-1.11837	0.000884475	---	GENSCAN00000018776
17747758	4.02135	3.5997	-1.11713	0.0482165	Vom2r47	NM_001099506
17791329	5.30256	4.74687	-1.11706	0.00212449	Npvf	NM_023952
17606975	5.30661	4.7515	-1.11683	0.0110606	---	---
17622979	3.79263	3.39695	-1.11648	0.0349042	Ccdc87	NM_001109527
17766552	5.58701	5.00441	-1.11642	0.0198512	Bmp2	NM_017178
17659942	4.35527	3.9018	-1.11622	0.00625752	Nog	NM_012990
17860813	5.16034	4.62363	-1.11608	0.0303274	Nyap2	XR_589287
17674212	4.43409	3.97607	-1.11519	0.0301939	Oas1e	NM_001009492
17826812	4.17572	3.74439	-1.11519	0.0168167	Cyp4f4	NM_173123
17848271	4.5748	4.10263	-1.11509	0.00517748	Prss44	NM_001109298
17605609	5.40024	4.84468	-1.11467	0.0306376	---	---
17604043	5.58058	5.00665	-1.11463	0.0166834	---	---
17768497	5.17587	4.64486	-1.11432	0.0146948	---	ENSRNOT00000087538
17883634	4.15209	3.72709	-1.11403	0.0357181	---	---
17681666	5.11945	4.59558	-1.11399	0.0362415	Gpa33	NM_001191829
17856953	4.71242	4.23039	-1.11394	0.0367306	Efhb	NM_001106879
17767488	4.75758	4.27161	-1.11377	0.0326039	Xkr7	NM_001012092
17651028	6.73393	6.04675	-1.11364	0.0134201	Krtap31-1	NM_001109409
17878161	6.04498	5.43029	-1.1132	0.00374386	Cited1	NM_172055
17824104	4.23864	3.80826	-1.11301	0.039568	LOC299277	XM_008764902
17797967	4.49111	4.03579	-1.11282	0.0180481	---	GENSCAN00000040114
17733825	4.68383	4.20953	-1.11267	0.00919238	Dynlrb2	NM_001108451
17882705	4.62437	4.15722	-1.11237	0.0184472	---	NM_013183
17623158	4.29263	3.85917	-1.11232	0.0328506	---	NONRATT002972
17872065	4.50203	4.04757	-1.11228	0.0292628	---	ENSRNOT00000081857
17608487	4.97118	4.46977	-1.11218	0.0477457	---	---
17603535	4.78702	4.30505	-1.11195	0.0402401	---	---
17675050	5.10452	4.59167	-1.11169	0.00918791	Map2k7	XM_001067872
17877718	5.38148	4.84122	-1.11159	0.00553016	RGD1561382	XM_001064013
17635738	4.74884	4.27239	-1.11152	0.0263203	Olr193	NM_001000186
17618268	4.32629	3.89416	-1.11097	0.0401248	---	GENSCAN00000012012
17708420	5.43705	4.89495	-1.11075	0.0135457	Unc5d	NM_001107319
17825279	4.91506	4.42572	-1.11057	0.0218438	Abcb5	XM_006225905
17763067	4.60143	4.14486	-1.11015	0.0339125	---	XM_006224627
17813463	5.37286	4.83995	-1.11011	0.00527975	---	---
17652017	4.86222	4.38074	-1.10991	0.0137282	Ace3	NM_001258237
17664320	6.03761	5.4404	-1.10977	0.019942	---	ENSRNOT00000062574
17724626	4.88951	4.40636	-1.10965	0.0128291	Neto1	NM_001107371
17634776	4.44673	4.00777	-1.10953	0.0160276	Olr29	NM_001000691
17636421	4.54313	4.09646	-1.10904	0.0183073	Calca	NM_001033955
17642740	4.28715	3.86572	-1.10902	0.0464269	---	ENSRNOT00000077279
17607011	5.20127	4.69019	-1.10897	0.0491973	---	---
17635528	5.61368	5.06262	-1.10885	0.0106094	Olr51	NM_001001021
17600465	5.69777	5.13912	-1.10871	0.0175854	---	---
17615434	5.08914	4.59258	-1.10812	0.03168	Sbsn	NM_001044231
17603043	5.84311	5.27586	-1.10752	0.00786067	---	---
17609915	5.79148	5.23019	-1.10732	0.0407625	---	---
17781889	4.68147	4.22785	-1.10729	0.0311373	Spam1	NM_053967
17734535	5.16601	4.6683	-1.10661	0.0258965	LOC102547637	XR_342447
17659474	4.76823	4.30918	-1.10653	0.0392741	Lhx1	NM_145880
17685929	4.79395	4.33418	-1.10608	0.0458074	RGD1309106	NM_001014130
17797006	4.998	4.51898	-1.106	0.0302949	Rgs20	NM_001127495
17794339	4.79643	4.33683	-1.10598	0.0193383	Wnt5b	NM_001100489
17827966	4.98088	4.50374	-1.10594	0.0294681	---	ENSRNOT00000090516
17723019	5.17452	4.67971	-1.10574	0.0259515	---	GENSCAN00000049718
17802918	5.23712	4.73755	-1.10545	0.038486	---	---
17736692	5.15097	4.66087	-1.10515	0.00590113	---	ENSRNOT00000080526
17820421	5.44416	4.92799	-1.10474	0.0188492	Clip4	NM_001013942
17857472	4.84022	4.38227	-1.1045	0.0148143	Gnmt	NM_017084
17731090	4.59164	4.15827	-1.10422	0.0497826	Capn9	NM_001271140
17829493	4.66983	4.23016	-1.10394	0.0366501	---	ENSRNOT00000054629
17883003	4.66983	4.23016	-1.10394	0.0366501	---	ENSRNOT00000054629
17635954	5.12834	4.64553	-1.10393	0.0378042	LOC499235	XM_001076383
17688092	5.45665	4.94317	-1.10388	0.0220357	---	---
17745923	4.27561	3.87446	-1.10354	0.0282619	LOC499542	NM_001047943
17602575	5.73678	5.19976	-1.10328	0.0154477	---	---
17636019	4.87446	4.4183	-1.10324	0.0258504	Ric3	NM_001115045
17855546	4.70559	4.26641	-1.10294	0.027486	Lsmem2	XM_001071401
17779078	5.04505	4.57475	-1.1028	0.0107682	Jph2	NM_001037974
17715355	5.93752	5.38486	-1.10263	0.0317871	RGD1564786	XM_003754666
17845434	4.57411	4.14842	-1.10262	0.0387834	C2cd4b	XM_001056441
17816841	5.1634	4.68296	-1.10259	0.0306449	---	NONRATT046973
17770130	5.37706	4.87768	-1.10238	0.000955219	Noxa1	NM_001100171
17657885	5.10519	4.63244	-1.10205	0.0014633	LOC497938	NM_001017475
17874027	5.52338	5.01202	-1.10203	0.00719182	Arxes2	XM_006227467
17723923	4.59889	4.17316	-1.10202	0.0270263	Cplx4	NM_001191835
17749195	4.58728	4.16296	-1.10193	0.0459865	Lce1f	NM_001109188
17703296	4.7996	4.35564	-1.10193	0.0383693	LOC100912477	XM_008770811
17794908	5.077	4.60841	-1.10168	0.00516352	Lag3	NM_212513
17878909	4.41321	4.00654	-1.1015	0.0300303	Bex2	NM_001077435
17602627	6.17389	5.60644	-1.10121	0.0287988	---	---
17649608	4.4166	4.01292	-1.10059	0.0424163	Wfdc17	XM_002727786
17881821	5.46061	4.96175	-1.10054	0.036123	---	NM_001014271
17689138	4.7484	4.31464	-1.10053	0.0275454	Tmprss11g	NM_001008554
17882335	4.58598	4.16713	-1.10051	0.0326583	---	XM_008774194
17809486	5.36249	4.87313	-1.10042	0.0310282	---	GENSCAN00000017738
17707428	4.80062	4.364	-1.10005	0.0124318	Npy5r	XM_006253013
17840689	4.94177	4.49238	-1.10004	0.00134731	Zfp641	NM_001106792
17813301	4.76211	4.32945	-1.09994	0.0132025	---	---
17694801	4.21763	3.83499	-1.09978	0.0109108	Gba3	NM_001106010
17609549	5.91908	5.38671	-1.09883	0.0129896	---	---
17613757	5.17755	4.71301	-1.09856	0.0297201	Ccdc8	NM_001009533
17702030	5.70838	5.19781	-1.09823	0.0361457	Rnase11	NM_001012476
17751175	4.90108	4.4628	-1.09821	0.00621561	---	ENSRNOT00000086024
17633360	6.73765	6.1353	-1.09818	0.0420344	LOC102552287	XR_350353
17843290	5.07666	4.62597	-1.09743	0.0350819	Olr1237	NM_001000963
17800635	6.27907	5.72221	-1.09732	0.0148136	Glis1	XM_006225448
17846278	4.76035	4.33822	-1.0973	0.0156288	---	GENSCAN00000044420
17619676	5.7111	5.20555	-1.09712	0.0413129	Parva	NM_020656
17840175	4.88152	4.45021	-1.09692	0.0340528	Syt10	NM_031666
17845663	4.7462	4.32922	-1.09632	0.035364	Aldh1a2	NM_053896
17843707	5.69133	5.19143	-1.09629	0.00387535	---	ENSRNOT00000089208
17655496	5.17605	4.72202	-1.09615	0.0135619	---	---
17764288	7.2563	6.62016	-1.09609	0.00181408	Pamr1	NM_001107755
17623944	4.94317	4.51045	-1.09594	0.0136133	Scgb2a2	NM_203333
17660032	4.42593	4.0391	-1.09577	0.0345952	Kif2b	NM_001005874
17676101	5.14672	4.69775	-1.09557	0.0480196	Slc29a4	NM_001105911
17759240	5.13069	4.68334	-1.09552	0.00454362	RGD1561147	OTTRNOT00000001670
17842847	4.44017	4.05318	-1.09548	0.0188276	Adamts8	XM_003750455
17609935	6.0938	5.56282	-1.09545	0.02736	---	---
17846431	4.90104	4.47583	-1.095	0.0477597	Mrap2	NM_001108774
17882831	5.56615	5.08496	-1.09463	0.00931759	---	NONRATT015812
17824344	5.21935	4.7685	-1.09455	0.0430286	Mir3576	NR_037368
17742246	4.60547	4.2093	-1.09412	0.0373324	Dpyd	NM_031027
17862356	5.80962	5.31002	-1.09409	0.00236697	Yes1	NM_033298
17804058	4.07472	3.72448	-1.09404	0.0192264	---	GENSCAN00000043371
17604877	5.32017	4.86431	-1.09372	0.017134	---	---
17864155	5.05976	4.62669	-1.0936	0.0215107	LOC102547353	NR_132639
17843411	4.96921	4.54491	-1.09336	0.0350387	Olr1337	NM_001000480
17808056	4.53069	4.1442	-1.09326	0.0411625	LOC688893	XM_008763818
17712437	5.01016	4.58452	-1.09284	0.0208886	---	ENSRNOT00000081241
17761854	5.79077	5.29882	-1.09284	0.00728263	---	---
17744336	5.26093	4.81421	-1.09279	0.0132426	Pde8b	NM_199268
17761795	4.47932	4.10036	-1.09242	0.0153494	Olr423	NM_001000391
17749022	4.78212	4.37931	-1.09198	0.0359107	Creb3l4	NM_001007093
17690171	4.67644	4.28323	-1.0918	0.0277439	Lgi2	NM_001107219
17725450	5.42562	4.97117	-1.09142	0.0439483	Nme5	XM_003751760
17862441	5.6838	5.20869	-1.09122	0.0372015	LOC100910172	XM_003750615
17877649	4.69708	4.30489	-1.0911	0.00638109	---	ENSRNOT00000050742
17605561	5.02194	4.60282	-1.09106	0.0465697	---	---
17607681	5.68198	5.20803	-1.09101	0.0431166	---	---
17609099	5.68198	5.20803	-1.09101	0.0431166	---	---
17768668	5.50923	5.05162	-1.09059	0.0163706	Tox2	NM_199392
17671144	4.9908	4.57647	-1.09053	0.00969061	---	GENSCAN00000010332
17781529	4.43791	4.06954	-1.09052	0.0319122	---	ENSRNOT00000079946
17698369	5.00251	4.58767	-1.09043	0.0190592	---	ENSRNOT00000078887
17782216	4.4808	4.11004	-1.09021	0.0140134	Cpa5	NM_001002808
17684169	4.73014	4.33879	-1.0902	0.0161248	Nfasc	NM_001160313
17813036	6.31163	5.78977	-1.09014	0.0091265	Hes3	NM_022687
17864988	6.09946	5.59532	-1.0901	0.0170532	---	ENSRNOT00000087417
17695172	5.41724	4.97048	-1.08988	0.0395172	Afap1	XM_008770245
17775034	4.76256	4.36983	-1.08987	0.0250687	---	GENSCAN00000041200
17831539	5.0684	4.65358	-1.08914	0.0259577	Mov10l1	XM_006226211
17681254	5.19377	4.77173	-1.08844	0.0263253	---	NONRATT016633
17877638	5.12635	4.71022	-1.08834	0.00939424	Mageb3	NM_001106965
17828407	5.90733	5.429	-1.08811	0.0306333	---	NONRATT049641
17824656	6.12644	5.63146	-1.0879	0.00887647	---	ENSRNOT00000079301
17606261	5.76894	5.30408	-1.08764	0.0358351	---	---
17812281	4.51768	4.15383	-1.08759	0.0402881	Pramef12	XM_006225597
17613529	4.88998	4.49679	-1.08744	0.0295759	---	ENSRNOT00000085100
17854667	5.39342	4.95979	-1.08743	0.019836	LOC102550510	XR_348670
17635080	6.83178	6.28325	-1.0873	0.0297515	Omp	NM_012616
17600327	6.29357	5.78849	-1.08726	0.0189649	---	---
17619053	4.81015	4.42596	-1.0868	0.0087917	Olr59	NM_173293
17879512	4.76298	4.38353	-1.08656	0.000835332	Fgf13	ENSRNOT00000091330
17715332	5.27297	4.85319	-1.0865	0.00935451	Tubb2b	NM_001013886
17801896	5.22779	4.81192	-1.08642	0.0121151	Pou3f1	NM_138838
17624339	5.32746	4.90494	-1.08614	0.00722864	Olr354	NM_001001045
17648707	5.75444	5.29832	-1.08609	0.00282344	Dbil5	NM_021596
17650552	5.13593	4.72967	-1.0859	0.0289782	Hoxb1	XM_001081344
17607735	5.79139	5.33333	-1.08589	0.03656	---	---
17609153	5.79139	5.33333	-1.08589	0.03656	---	---
17734793	5.61205	5.16851	-1.08582	0.0253018	LOC688542	XM_008760597
17611785	5.31136	4.89324	-1.08545	0.025692	Acat2	NM_001006995
17603999	6.64389	6.1213	-1.08537	0.0394462	---	---
17661189	5.66527	5.22021	-1.08526	0.0263675	Krt34	NM_001008758
17601075	6.87759	6.33785	-1.08516	0.00875631	---	---
17601409	6.87759	6.33785	-1.08516	0.00875631	---	---
17721665	4.69897	4.33061	-1.08506	0.0296002	---	GENSCAN00000048869
17605487	6.70403	6.17869	-1.08502	0.00483456	---	---
17763172	5.95116	5.48636	-1.08472	0.00315803	Dfnb59	XM_006224498
17629546	5.95792	5.4929	-1.08466	0.0253044	Ccdc106	XM_008759011
17735842	4.85797	4.47906	-1.08459	0.0193601	Mcidas	XM_001068366
17768732	6.36565	5.87029	-1.08439	0.0131666	Kcnk15	NM_130813
17882473	4.84571	4.46896	-1.08431	0.0315924	---	XM_001072891
17815742	6.01875	5.55219	-1.08403	0.00871938	---	ENSRNOT00000080886
17787128	5.89015	5.43751	-1.08324	0.0408626	---	---
17612556	4.43211	4.09191	-1.08314	0.0381895	---	---
17861671	5.61994	5.18994	-1.08285	0.0191967	Olr1349	NM_001000484
17758286	6.00128	5.54425	-1.08243	0.0464153	---	GENSCAN00000028760
17604185	5.19181	4.79672	-1.08237	0.0481145	---	---
17880410	6.22563	5.75283	-1.08219	0.0384027	---	ENSRNOT00000039245
17665014	5.26944	4.86985	-1.08205	0.0359802	---	---
17602061	5.27671	4.87843	-1.08164	0.027569	---	---
17799810	6.32581	5.8493	-1.08146	0.00124301	---	---
17678372	5.17087	4.78147	-1.08144	0.0266146	RGD1562310	NM_001109066
17604235	5.02044	4.64263	-1.08138	0.0313032	---	---
17672878	5.92324	5.47757	-1.08136	0.0218913	Ssc4d	XM_001077242
17747548	6.75874	6.25049	-1.08131	0.017571	Erich6	NM_001024300
17876715	4.87671	4.5102	-1.08126	0.0242155	LOC103690888	XM_008758533
17644331	5.55169	5.13447	-1.08126	0.0198656	Noxo1	NM_001106986
17882507	5.80178	5.36577	-1.08126	0.0477059	---	XM_008765862
17774148	5.89282	5.45013	-1.08123	0.0033649	Olr505	NM_001000679
17662347	5.00769	4.63162	-1.0812	0.00547232	---	---
17777209	6.06915	5.6145	-1.08098	0.034086	Pdyn	NM_019374
17607299	6.15111	5.69038	-1.08097	0.0211731	---	---
17785030	5.08265	4.70362	-1.08058	0.026586	---	ENSRNOT00000080196
17713375	5.82944	5.39513	-1.0805	0.0465654	Lamb2	NM_012974
17725943	4.82612	4.46661	-1.08049	0.0237679	Grxcr2	NM_001191078
17778324	7.07748	6.55114	-1.08034	0.00173519	Defb29	NM_001037368
17851813	6.08816	5.63744	-1.07995	0.00799877	Upk2	NM_001109523
17633198	8.07642	7.48013	-1.07972	0.0206366	---	ENSRNOT00000078692
17754230	5.70542	5.28575	-1.0794	0.0197421	Lrrc3	NM_145679
17601077	7.54699	6.99236	-1.07932	0.0151365	---	---
17601411	7.54699	6.99236	-1.07932	0.0151365	---	---
17838598	5.8366	5.40798	-1.07926	0.00689049	---	ENSRNOT00000080508
17821091	5.16326	4.78468	-1.07913	0.0350073	Mycn	NM_001013096
17608859	6.3021	5.84129	-1.07889	0.0220938	---	---
17746142	4.71505	4.37112	-1.07868	0.049422	Ropn1l	NM_001191086
17649180	4.80164	4.45187	-1.07857	0.00664173	Mir423	NR_032276
17811841	5.9404	5.50839	-1.07843	0.00241735	Pax7	NM_001191984
17680867	4.60873	4.27496	-1.07808	0.0328892	---	---
17665967	4.8747	4.52243	-1.0779	0.0180631	Fbxo40	XM_006248404
17601681	4.4241	4.10626	-1.0774	0.0443804	---	---
17823188	5.78997	5.37426	-1.07735	0.0471104	Abcd4	NM_001013100
17605651	5.85909	5.43855	-1.07733	0.0159929	---	---
17744314	5.19216	4.81967	-1.07728	0.0179114	Bhmt2	NM_001014256
17807890	4.72067	4.38214	-1.07725	0.0044915	---	GENSCAN00000031394
17851421	6.10622	5.66888	-1.07715	0.0279828	Crtam	NM_001106813
17619437	6.34027	5.88668	-1.07705	0.01853	Nlrp10	NM_001106291
17796078	5.29822	4.91963	-1.07696	0.00521671	---	GENSCAN00000019540
17808188	5.71022	5.30298	-1.07679	0.0247997	Tle1	NM_001173433
17601605	5.56775	5.17067	-1.07679	0.0328778	---	---
17729434	5.16836	4.80025	-1.07669	0.0471949	Hsd11b2	NM_017081
17827113	5.87886	5.46046	-1.07662	0.0243175	---	ENSRNOT00000090020
17824318	5.6778	5.2743	-1.0765	0.0289344	Wdr25	NM_001135894
17810547	4.49914	4.17948	-1.07648	0.0196491	---	---
17693071	6.48915	6.02854	-1.07641	0.0404705	---	---
17880121	6.37626	5.92581	-1.07602	0.0334312	Dmrtc1a	ENSRNOT00000074259
17605069	6.18831	5.7513	-1.07599	0.0251006	---	---
17866346	4.99646	4.64405	-1.07588	0.0318466	Iqca1	XM_001066515
17844098	5.99057	5.56807	-1.07588	0.0276129	Arhgap20	NM_213629
17649499	4.9531	4.60507	-1.07558	0.0459866	Unc45b	NM_001107028
17881191	6.33825	5.8933	-1.0755	0.00316659	---	RPTR-AF292560-1
17702407	5.33995	4.96622	-1.07525	0.00953059	---	GENSCAN00000058629
17611503	5.51325	5.12793	-1.07514	0.0309895	Ccdc170	XM_001065531
17704825	6.54997	6.09325	-1.07495	0.0342809	Pcdh20	NM_001107280
17845526	6.25602	5.82007	-1.0749	0.0142081	Rora	XM_008766408
17881939	7.30052	6.79477	-1.07443	0.00104576	---	XM_006227052
17847203	5.95358	5.5414	-1.07438	0.0332315	Col6a4	NM_001271182
17651280	5.62414	5.23497	-1.07434	0.0335074	Cntd1	NM_001197217
17659584	4.56657	4.25065	-1.07432	0.0372386	---	---
17801990	5.65679	5.26588	-1.07423	0.0442179	RGD1560436	NM_001109264
17857098	5.66023	5.26943	-1.07416	0.049177	Daam2	XM_006226766
17731182	6.16212	5.7373	-1.07405	0.00856955	Ntpcr	NM_001134573
17610516	5.99928	5.58578	-1.07403	0.00525194	---	---
17649132	5.69001	5.2979	-1.07401	0.0159605	Tp53i13	NM_001105818
17881717	8.29727	7.72771	-1.0737	0.0344938	---	---
17793412	5.66206	5.27446	-1.07349	0.0339176	Magi1	NM_001030045
17795893	4.53308	4.22287	-1.07346	0.0373453	Grin2b	NM_012574
17628646	5.76947	5.37533	-1.07332	0.044111	Ccr6	NM_001013145
17842292	5.83207	5.43455	-1.07315	0.0173714	Zfp846	NM_001134585
17870567	5.3638	4.99841	-1.0731	0.0121896	RGD1560927	NM_001109315
17668582	5.34718	4.98322	-1.07304	0.00952409	---	ENSRNOT00000080645
17821011	5.70117	5.31438	-1.07278	0.0188234	Klhl29	NM_001106713
17606739	6.34982	5.92017	-1.07257	0.0390435	---	---
17646050	5.33075	4.97038	-1.0725	0.0427416	---	---
17632211	6.00208	5.59647	-1.07247	0.0269017	---	GENSCAN00000021695
17804140	4.73967	4.41983	-1.07236	0.0212289	Nppa	NM_012612
17867772	5.55871	5.18369	-1.07235	0.0414644	Acer1	NM_001106875
17863712	5.57759	5.2043	-1.07173	0.0203247	Prss40	NM_001108209
17681241	5.50247	5.13499	-1.07156	0.0144505	---	---
17606859	5.03587	4.70059	-1.07133	0.0258618	---	---
17882207	6.56483	6.12778	-1.07132	0.0128484	---	NR_028365
17882035	5.75058	5.3684	-1.07119	0.0281321	---	NM_001101021
17883576	5.95287	5.55736	-1.07117	0.0159703	---	---
17727796	4.43689	4.14231	-1.07111	0.0486677	---	---
17675597	5.64706	5.27431	-1.07067	0.0192324	---	---
17600985	7.96738	7.4422	-1.07057	0.0332496	---	---
17601319	7.96738	7.4422	-1.07057	0.0332496	---	---
17777302	6.2672	5.85417	-1.07055	0.0360434	Slc4a11	NM_001107775
17877640	5.14494	4.80596	-1.07053	0.0395225	mageb1l1	XM_006227347
17754651	6.04114	5.6438	-1.0704	0.015489	Bicc1	NM_001108531
17837137	5.30012	4.95245	-1.0702	0.0281762	Sybu	XM_006226063
17824352	5.4213	5.06695	-1.06993	0.0177989	RGD1305298	NM_001134526
17744616	5.1933	4.85422	-1.06985	0.0149334	Tmem171	NM_001013903
17709248	5.32911	4.98153	-1.06977	0.0152807	Atp4b	NM_012510
17786914	5.10425	4.77135	-1.06977	0.0487046	Nanog	NM_001100781
17606167	6.61843	6.18812	-1.06954	0.0127366	---	---
17600675	6.5839	6.15768	-1.06922	0.00569362	---	---
17610189	6.5839	6.15768	-1.06922	0.00569362	---	---
17702506	5.81752	5.44103	-1.0692	0.0122581	LOC290071	BC091273
17810714	6.1137	5.71875	-1.06906	0.00552636	Gja4	NM_021654
17875847	6.28447	5.87892	-1.06898	0.00465705	Chst7	NM_207600
17853371	5.57773	5.21839	-1.06886	0.00288269	Iqch	NM_001106830
17878760	6.6328	6.20566	-1.06883	0.0324171	LOC102555917	XM_008758509
17839665	4.80992	4.50027	-1.06881	0.00401285	RGD1566029	XM_006226181
17720009	5.21163	4.87635	-1.06876	0.0171798	Armc4	XM_006222441
17606843	5.13289	4.8036	-1.06855	0.0423651	---	---
17779825	5.87664	5.49994	-1.06849	0.0284559	---	ENSRNOT00000075547
17827996	6.53273	6.11452	-1.0684	0.013727	Ppfia2	NM_001108745
17744450	7.33458	6.86547	-1.06833	0.00756011	---	ENSRNOT00000088791
17609861	5.65423	5.29272	-1.0683	0.0186271	---	---
17881867	4.62608	4.33053	-1.06825	0.0478958	---	XM_001070426
17617952	6.09007	5.70156	-1.06814	0.0252039	Adamtsl3	NM_001107533
17841714	5.10137	4.77599	-1.06813	0.00990334	LOC102555445	XM_006242468
17705538	5.59669	5.24008	-1.06805	0.00410448	LOC290071	BC091273
17654512	5.77119	5.40396	-1.06796	0.0384994	Slc9a3r2	NM_053811
17638177	6.28921	5.89055	-1.06768	0.013999	Syce1	NM_001025058
17718233	5.73276	5.36984	-1.06758	0.0275372	Unc5a	NM_022206
17693376	5.94851	5.57209	-1.06755	0.018841	---	ENSRNOT00000077515
17804305	5.50037	5.15255	-1.06751	0.0379446	Casz1	XM_006225624
17721975	5.39994	5.05895	-1.0674	0.0462068	---	NONRATT025625
17609671	6.92826	6.49165	-1.06726	0.0344812	---	---
17709497	5.85503	5.48644	-1.06718	0.0425086	Slc10a2	XM_006227219
17666560	6.14999	5.76289	-1.06717	0.0420875	---	GENSCAN00000003864
17715954	5.24789	4.91857	-1.06695	0.0451115	Pou6f2	NM_001101002
17877485	5.37613	5.03914	-1.06687	0.0430523	Ptges3l1	NM_001014272
17782095	6.03064	5.65466	-1.06649	0.036596	Smo	NM_012807
17718771	6.6208	6.20807	-1.06648	0.048398	Phactr1	NM_214457
17600467	6.20231	5.81746	-1.06615	0.0463739	---	---
17690484	6.94732	6.5166	-1.0661	0.00825161	Nsg1	NM_024128
17602655	6.7404	6.32391	-1.06586	0.00636808	---	---
17627707	5.68562	5.33473	-1.06578	0.047458	Moxd1	XM_001054130
17799330	5.45108	5.11485	-1.06573	0.0412778	Mir455	NR_032279
17780265	5.29456	4.96815	-1.0657	0.0235058	Bdnf	NM_001270630
17754673	8.03355	7.53831	-1.0657	0.00391242	---	ENSRNOT00000085952
17760196	5.59381	5.24934	-1.06562	0.0151252	LOC681186	XM_001060674
17726987	4.82489	4.52842	-1.06547	0.0360537	---	ENSRNOT00000058894
17608249	6.08222	5.70874	-1.06542	0.0210225	---	---
17816099	5.81494	5.4582	-1.06536	0.000904151	---	ENSRNOT00000089568
17803896	5.5267	5.18777	-1.06533	0.0188244	Epha2	NM_001108977
17630489	4.81522	4.52015	-1.06528	0.00601053	Tex101	XM_006228381
17622119	7.234	6.7934	-1.06486	0.0126865	B4galnt4	NM_001107562
17771223	7.59199	7.13218	-1.06447	0.0477327	Qrfp	NM_198200
17664328	6.17964	5.80543	-1.06446	0.0371147	Rbm11	NM_001105898
17659255	5.19797	4.88369	-1.06435	0.0458983	---	ENSRNOT00000089838
17719224	6.31652	5.93499	-1.06429	0.0292419	---	ENSRNOT00000063068
17688247	5.53023	5.19624	-1.06428	0.0308041	Hsd17b13	NM_001009684
17601181	6.61723	6.21762	-1.06427	0.0251634	---	---
17601515	6.61723	6.21762	-1.06427	0.0251634	---	---
17869695	5.57498	5.23835	-1.06426	0.0403171	RGD1564212	XM_002725076
17791390	6.17476	5.80196	-1.06425	0.025688	Hoxa7	NM_001109233
17823003	5.16301	4.85339	-1.06379	0.023571	Adam4l1	NM_001109277
17606611	6.58418	6.19002	-1.06368	0.00437553	---	---
17607255	6.58418	6.19002	-1.06368	0.00437553	---	---
17642527	6.03632	5.67733	-1.06323	0.00969788	Pitx3	NM_019247
17670580	5.42403	5.10158	-1.06321	0.0308728	Olr1569	NM_001000042
17849815	6.556	6.16632	-1.0632	0.0348477	---	ENSRNOT00000092214
17840679	6.21709	5.84896	-1.06294	0.00110124	---	---
17882555	5.53417	5.20898	-1.06243	0.0423701	---	XM_006227192
17795358	5.62626	5.29616	-1.06233	0.00896691	Clec2e	NM_001177689
17815528	6.85128	6.44932	-1.06233	0.0148184	---	---
17788192	6.95112	6.5447	-1.0621	0.00976272	Arntl2	NM_133391
17705556	5.69427	5.36244	-1.06188	0.032912	LOC100360891	ENSRNOT00000042721
17706415	5.12604	4.82856	-1.06161	0.0402258	Frmpd2	XM_008771103
17757333	6.39392	6.02287	-1.06161	0.00444248	Ccdc167	NM_001109548
17698254	5.57188	5.24863	-1.06159	0.0353079	---	ENSRNOT00000073533
17696256	5.93696	5.59282	-1.06153	0.0461361	Pkd1l1	XM_008766676
17855397	5.97258	5.6266	-1.06149	0.0234653	LOC102550160	XM_006226556
17689351	5.65008	5.32333	-1.06138	0.0242916	Nmu	NM_022239
17834018	5.78558	5.45111	-1.06136	0.0432848	Fgf22	NM_130751
17603771	6.26655	5.90654	-1.06095	0.0214446	---	---
17826613	5.72184	5.39313	-1.06095	0.0381727	---	---
17647298	5.75102	5.42071	-1.06094	0.0413614	Rpl26	ENSRNOT00000078038
17674232	5.89607	5.55842	-1.06075	0.0352758	Rita1	NM_001044226
17778331	4.61309	4.34916	-1.06069	0.0442808	Defb24	NM_001037508
17845789	5.66834	5.34467	-1.06056	0.0125395	Dyx1c1	NM_001007010
17815747	6.08426	5.73704	-1.06052	0.0286111	RGD1559629	ENSRNOT00000049500
17704941	5.64495	5.32323	-1.06044	0.0263907	---	---
17702334	5.6091	5.28989	-1.06034	0.046237	---	ENSRNOT00000060298
17874224	6.25428	5.90006	-1.06004	0.0442722	Mid2	NM_001191889
17881951	5.61378	5.29619	-1.05997	0.0400424	---	NM_001047113
17685434	6.73218	6.35164	-1.05991	0.00404404	Mr1	NM_001100635
17678784	6.20098	5.85049	-1.05991	0.0410511	Fam222a	NM_001109067
17723928	7.43324	7.0155	-1.05955	0.0180093	Rax	NM_053678
17805295	6.28259	5.92959	-1.05953	0.0219738	---	---
17643139	6.11408	5.77088	-1.05947	0.0107042	Vax1	NM_022636
17882613	7.63875	7.21138	-1.05926	0.0455948	---	NM_013035
17613753	5.73567	5.41515	-1.05919	0.0372635	Pnmal1	NM_001108473
17601981	5.89976	5.57326	-1.05858	0.0166642	---	---
17840384	5.79719	5.47713	-1.05844	0.00366494	Nell2	NM_031070
17670081	6.73507	6.36421	-1.05827	0.00233414	Rtp1	NM_001105870
17881601	5.5434	5.23951	-1.058	0.0333638	---	XR_600372
17741072	5.46781	5.16984	-1.05764	0.0395333	Ankrd35	XM_001063190
17698315	6.56572	6.20816	-1.05759	0.0195001	---	AB036696
17778123	6.0079	5.6811	-1.05752	0.0381458	RGD1565143	XR_591769
17654249	5.31801	5.0288	-1.05751	0.00918698	Prss30	NM_199371
17603265	6.01066	5.68513	-1.05726	0.0133053	---	---
17656988	7.23562	6.84395	-1.05723	0.0322153	Rnf112	NM_138613
17744705	6.30837	5.96772	-1.05708	0.00745317	Cartpt	NM_017110
17697116	6.56291	6.20922	-1.05696	0.0187019	Mss51	NM_001106025
17610457	4.82393	4.56541	-1.05663	0.0363127	---	GENSCAN00000004972
17838798	5.33535	5.0505	-1.0564	0.0220335	Lrrc24	NM_001135896
17782860	6.40486	6.06336	-1.05632	0.0482531	Trbv13-2	ENSRNOT00000091655
17872725	6.68027	6.32459	-1.05624	0.0355598	---	---
17608175	8.4291	7.98146	-1.05608	0.023791	---	---
17682317	6.49785	6.15432	-1.05582	0.0360871	Kmo	NM_021593
17697062	6.83754	6.47642	-1.05576	0.0251465	Synpo2l	NM_001305138
17834700	5.10813	4.83982	-1.05544	0.0352519	---	GENSCAN00000010935
17602779	6.30251	5.97163	-1.05541	0.0267496	---	---
17783099	5.4198	5.13603	-1.05525	0.0381435	Arhgef5	XM_001073085
17720497	4.52884	4.29188	-1.05521	0.0490649	Akr1c1	NM_001033697
17714873	6.27957	5.9528	-1.05489	0.0403009	Ptpdc1	NM_001106104
17604095	5.92381	5.61565	-1.05487	0.0487704	---	---
17644009	7.07344	6.70565	-1.05485	0.01843	Nlrc3	XM_006220565
17788897	5.75948	5.46064	-1.05473	0.0401637	---	ENSRNOT00000069841
17643476	8.23293	7.80622	-1.05466	0.00458027	LOC102550998	XM_006234663
17874195	6.62801	6.28532	-1.05452	0.0342197	Cldn2	NM_001106846
17807538	6.15258	5.83462	-1.0545	0.0191364	Txndc8	NM_001004092
17683261	6.33782	6.01269	-1.05408	0.0123021	Irf6	NM_001108859
17603743	6.02129	5.71263	-1.05403	0.0241671	---	---
17848689	5.30856	5.03677	-1.05396	0.0309223	Mir26a	NR_031830
17851823	6.29139	5.97132	-1.0536	0.020471	Cxcr5	NM_053303
17851246	7.18329	6.81795	-1.05359	0.02927	Olr1279	NM_001000961
17876097	5.07552	4.81746	-1.05357	0.0281534	Hypm	NM_001134598
17602537	7.92439	7.52199	-1.0535	0.0452134	---	---
17674510	5.47786	5.1997	-1.0535	0.0389156	---	GENSCAN00000018884
17649130	7.50094	7.12106	-1.05335	0.00577561	---	---
17846260	6.57649	6.24358	-1.05332	0.00837747	Irak1bp1	NM_001277283
17760312	7.65329	7.26635	-1.05325	0.0176135	Gbgt1	NM_023094
17675619	6.39782	6.07626	-1.05292	0.0402697	Mtus2	NM_001100989
17733582	6.26429	5.95045	-1.05274	0.0360474	---	---
17726735	8.03048	7.62831	-1.05272	0.0113752	---	GENSCAN00000041981
17674395	6.47816	6.15503	-1.0525	0.0303082	---	---
17781921	6.29539	5.98253	-1.0523	0.0256518	Fscn3	NM_001004232
17637493	5.31478	5.05119	-1.05218	0.0262228	Stx1b	NM_012700
17703427	4.92062	4.67845	-1.05176	0.0104007	---	ENSRNOT00000090169
17731446	6.00781	5.71297	-1.05161	0.0342821	Mmp15	NM_001106168
17874481	7.67334	7.29833	-1.05138	0.0144956	---	---
17870683	6.31165	6.00442	-1.05117	0.035589	---	GENSCAN00000037882
17693348	5.08056	4.8335	-1.05111	0.0480589	Fam47e	XM_006221696
17821260	5.52099	5.25323	-1.05097	0.0403904	---	GENSCAN00000027160
17614552	5.511	5.24442	-1.05083	0.036913	LOC100910127	XM_006231301
17780369	7.3148	6.96154	-1.05074	0.0344299	---	---
17725092	7.42857	7.07073	-1.05061	0.0474052	RGD1562080	XM_006254447
17702341	6.22836	5.92872	-1.05054	0.0432459	Tcrva8	Y09186
17703511	6.81678	6.49175	-1.05007	0.0137238	Atp8a2	XM_003751492
17774210	6.11218	5.82101	-1.05002	0.0290576	Olr552	NM_001001055
17690533	6.62889	6.31352	-1.04995	0.0369309	Wfs1	NM_031823
17774051	6.03458	5.74823	-1.04981	0.0238303	P2rx3	NM_001270621
17873704	5.91164	5.63136	-1.04977	0.00535778	H2afb3	NM_001106969
17787797	5.41176	5.1564	-1.04952	0.0226811	Gucy2c	NM_013170
17746202	7.36834	7.02103	-1.04947	0.0211254	---	GENSCAN00000045714
17695991	6.92144	6.59908	-1.04885	0.0214804	---	---
17601123	6.21045	5.92153	-1.04879	0.0398457	---	---
17601457	6.21045	5.92153	-1.04879	0.0398457	---	---
17638074	5.81786	5.54775	-1.04869	0.0328263	LOC103691261	XM_008760018
17669860	7.38227	7.03954	-1.04869	0.0263084	Pigz	XM_008768781
17607423	6.51285	6.21375	-1.04814	0.0257496	---	---
17718644	6.29786	6.00884	-1.0481	0.0464804	Id4	NM_175582
17741703	6.03473	5.75794	-1.04807	0.0495917	LOC100363178	NM_001302749
17868552	6.9782	6.65894	-1.04794	0.0468718	Tmem37	NM_139095
17802139	7.42761	7.08996	-1.04762	0.0460065	Col8a2	XM_001057987
17818835	6.96007	6.64626	-1.04722	0.0284773	Zfp839	XM_006225878
17614698	7.92173	7.56472	-1.04719	0.0414771	Prx	NM_023976
17735683	8.42524	8.04582	-1.04716	0.0054569	Pde4d	NM_001113328
17819240	5.96855	5.69991	-1.04713	0.0445773	Tex22	XM_003750240
17870159	7.01863	6.70348	-1.04701	0.0108221	---	XR_349441
17676959	6.22371	5.94712	-1.04651	0.0099156	Srrm3	NM_001277394
17882635	5.53999	5.29438	-1.04639	0.0362159	---	NM_024401
17688091	7.0209	6.70977	-1.04637	0.0410492	---	---
17857172	7.16807	6.85152	-1.0462	0.0284649	Foxp4	NM_001108788
17849448	6.37992	6.09964	-1.04595	0.0482576	LOC654482	NM_001039174
17817338	6.00451	5.74151	-1.04581	0.0125951	Dnal1	NM_001109477
17846985	6.42346	6.14239	-1.04576	0.00325095	Amotl2	NM_031717
17813704	6.04918	5.78485	-1.04569	0.0185108	Plekhh2	NM_001191770
17789285	7.20545	6.89074	-1.04567	0.00993935	---	GENSCAN00000010705
17689559	7.5891	7.25798	-1.04562	0.0487161	Txk	NM_001024255
17730578	6.03124	5.76949	-1.04537	0.0391677	Klhl36	NM_001017511
17606009	7.69525	7.36253	-1.04519	0.0253454	---	---
17695800	7.14523	6.83657	-1.04515	0.037732	RGD1308775	NM_001107233
17689771	9.25073	8.85209	-1.04503	0.0363952	Bend4	XM_006221735
17765325	6.58276	6.29981	-1.04491	0.0325997	Stard9	XM_001080099
17848898	6.62163	6.33765	-1.04481	0.0155269	Mobp	NM_012720
17797004	5.93022	5.67614	-1.04476	0.0264665	Npbwr1	NM_001014784
17765071	7.04831	6.74685	-1.04468	0.0354277	Dll4	NM_001107760
17690185	7.07281	6.77063	-1.04463	0.0327359	Ccdc149	XM_006221768
17600547	8.93351	8.55514	-1.04423	0.00213012	---	---
17610061	8.93351	8.55514	-1.04423	0.00213012	---	---
17824116	8.20623	7.85915	-1.04416	0.0146045	---	ENSRNOT00000085740
17883085	7.09047	6.79373	-1.04368	0.0478205	---	---
17842798	6.79332	6.51061	-1.04342	0.015605	Igsf9b	XM_001054496
17793691	7.39994	7.09265	-1.04332	0.0477418	---	---
17601979	9.4402	9.05016	-1.0431	0.0133172	---	---
17661741	7.50034	7.19429	-1.04254	0.0476644	Mpp3	NM_053668
17624453	5.79659	5.5604	-1.04248	0.0496047	Trpm6	XM_006223666
17631448	9.0365	8.671	-1.04215	0.0451617	---	GENSCAN00000029479
17697369	6.24733	5.99483	-1.04212	0.0352017	LOC498465	XM_006227064
17876870	7.88697	7.56878	-1.04204	0.0255768	Shroom2	NM_001047893
17753402	6.42289	6.16439	-1.04193	0.0298785	LOC499407	NM_001047939
17880589	6.7784	6.5078	-1.04158	0.0293417	---	NONRATT032537
17841318	7.63285	7.3287	-1.0415	0.0331455	Krt82	NM_001008803
17849437	7.87273	7.56067	-1.04127	0.0444231	Yap1	NM_001034002
17839120	6.92307	6.65056	-1.04098	0.0277768	Baiap2l2	NM_001271220
17611421	5.16123	4.95974	-1.04063	0.0149264	Iyd	NM_001025000
17682099	6.42584	6.17584	-1.04048	0.0256617	Igsf8	NM_001014787
17605611	7.14047	6.86501	-1.04013	0.0232506	---	---
17627742	7.27614	6.99583	-1.04007	0.0373969	Taar7e	NM_175590
17710343	7.55618	7.2654	-1.04002	0.0171734	---	GENSCAN00000030970
17652951	7.06337	6.79392	-1.03966	0.0274017	Mettl23	NM_001008283
17764784	5.66151	5.44707	-1.03937	0.0451485	---	GENSCAN00000044393
17663879	5.89754	5.67442	-1.03932	0.0344943	Mir338	NR_031783
17825276	8.42163	8.10505	-1.03906	0.0200991	---	GENSCAN00000007165
17657249	6.07594	5.85049	-1.03853	0.014897	---	GENSCAN00000016912
17687254	6.51477	6.27436	-1.03832	0.0324086	LOC103693700	XM_008769901
17665130	7.78436	7.5018	-1.03767	0.0256191	Olr1546	NM_001001106
17689947	7.86917	7.58938	-1.03687	0.00806166	Mir328b	NR_037399
17672343	6.93355	6.68735	-1.03682	0.014089	Azgp1	NM_012826
17792762	6.48919	6.26161	-1.03635	0.0379025	Rab11fip5	XM_003753914
17778982	6.74276	6.50657	-1.0363	0.0380685	RGD1563145	ENSRNOT00000051343
17739843	9.02057	8.70501	-1.03625	0.0131823	Mex3a	XM_006224180
17864351	5.44884	5.25863	-1.03617	0.0214355	---	GENSCAN00000010653
17734045	6.32988	6.10898	-1.03616	0.0362897	Zcchc14	XM_001079169
17660702	7.46189	7.20308	-1.03593	0.0194629	Cacnb1	NM_017346
17882703	9.33037	9.0075	-1.03584	0.0371669	---	NM_013062
17870833	6.1644	5.95342	-1.03544	0.0215313	---	GENSCAN00000041529
17626635	8.38594	8.09977	-1.03533	0.0478694	Adrb1	NM_012701
17829984	7.12648	6.88411	-1.03521	0.0255576	---	ENSRNOT00000078728
17603185	8.89167	8.5898	-1.03514	0.0358648	---	---
17711144	6.44345	6.22486	-1.03511	0.0477917	Zfp964	XM_006222184
17730555	6.69892	6.47281	-1.03493	0.0393196	Adad2	XM_002725395
17783858	8.07328	7.8021	-1.03476	0.0436385	LOC103695214	XM_008775751
17690968	7.99076	7.7243	-1.0345	0.0489453	---	GENSCAN00000019694
17690969	7.99076	7.7243	-1.0345	0.0489453	---	---
17869444	7.19873	6.96181	-1.03403	0.0305712	---	NONRATT004056
17648065	6.76522	6.5431	-1.03395	0.035046	---	---
17679419	7.29404	7.0551	-1.03387	0.0455621	---	---
17603207	8.49957	8.22405	-1.0335	0.0249018	---	---
17741359	9.19551	8.90217	-1.03295	0.0215873	Trim45	NM_001106453
17742633	9.57509	9.27536	-1.03231	0.0308054	Cfi	NM_024157
17750735	5.76298	5.58276	-1.03228	0.0120048	---	ENSRNOT00000080226
17787813	7.6366	7.40043	-1.03191	0.0228314	Pde6h	NM_053688
17612228	8.82836	8.55706	-1.0317	0.0267032	---	---
17604803	6.99321	6.78263	-1.03105	0.0494821	---	---
17605301	8.231	7.99246	-1.02985	0.0289593	---	---
17605235	7.9101	7.68471	-1.02933	0.0395481	---	---
17682865	8.6579	8.41466	-1.02891	0.0355072	Tlr5	NM_001145828
17870903	8.94772	8.70075	-1.02838	0.0497361	LOC307727	NM_001047882
17681407	7.20375	7.00541	-1.02831	0.0377659	Mir214	NR_031927
17796611	7.95235	7.74148	-1.02724	0.018868	LOC102551296	XM_006234031
17600865	7.58463	7.3862	-1.02686	0.0287302	---	---
17604061	8.48311	8.27087	-1.02566	0.0120572	---	---
17838414	9.10496	8.88327	-1.02496	0.0460267	---	---
17615374	8.19785	7.99912	-1.02484	0.0384713	RGD1560986	XM_008759244
17774168	10.9815	10.7391	-1.02257	0.0449506	Olr522	NM_001000562
17784234	8.84675	8.66324	-1.02118	0.00676291	---	ENSRNOT00000086526
17742873	10.5128	10.6553	1.01356	0.0083891	---	---
17811689	10.694	10.8987	1.01914	0.0434925	---	---
17810524	10.3607	10.565	1.01972	0.0416331	---	---
17725351	8.83216	9.0439	1.02397	0.00912154	---	GENSCAN00000008246
17653796	7.95082	8.15809	1.02607	0.0315215	---	---
17878716	6.43425	6.62239	1.02924	0.0353038	---	ENSRNOT00000050903
17775148	8.14014	8.37825	1.02925	0.0319062	RGD1560017	ENSRNOT00000049695
17827299	6.98277	7.19221	1.02999	0.0275657	LOC691921	NM_001135566
17611410	7.38664	7.61142	1.03043	0.0136166	---	XM_008758139
17690397	9.64026	9.95781	1.03294	0.0339785	RGD1561694	ENSRNOT00000040676
17689793	7.25212	7.49408	1.03336	0.0237161	---	ENSRNOT00000078801
17714036	7.9482	8.2139	1.03343	0.0397586	---	GENSCAN00000038024
17722461	7.3652	7.61916	1.03448	0.0201907	Slc4a9	NM_152938
17628084	8.53493	8.8332	1.03495	0.0460038	LOC679731	XR_597617
17741221	7.81814	8.10032	1.03609	0.0350461	---	ENSRNOT00000054534
17700158	8.28273	8.58692	1.03673	0.00522244	---	---
17823538	10.7263	11.125	1.03717	0.0238286	---	ENSRNOT00000078315
17829203	8.4085	8.72168	1.03725	0.024843	---	ENSRNOT00000089710
17863204	10.2032	10.6078	1.03965	0.0296094	---	---
17834129	5.4898	5.71144	1.04037	0.0475921	---	ENSRNOT00000063488
17741796	6.45074	6.71731	1.04133	0.0115177	Kcna10	NM_001191713
17797978	9.58136	9.97793	1.04139	0.0134774	---	---
17630241	5.40316	5.62716	1.04146	0.0262285	Cd3eap	NM_001109416
17827479	4.86261	5.06681	1.04199	0.0473472	---	GENSCAN00000027851
17835987	5.64509	5.88412	1.04234	0.0391377	RGD1306474	NM_001108746
17796850	6.69398	6.98176	1.04299	0.00950648	---	ENSRNOT00000078457
17806434	6.98347	7.28442	1.0431	0.04113	Ndufb6	NM_001106646
17625512	6.72823	7.02311	1.04383	0.0433141	---	GENSCAN00000015054
17671901	5.16462	5.39105	1.04384	0.0318291	---	NM_001034153
17713887	7.1744	7.49349	1.04448	0.0113524	---	XM_008773616
17702384	5.38378	5.62674	1.04513	0.0261307	---	GENSCAN00000058635
17871740	7.12194	7.45346	1.04655	0.0456711	LOC100362724	XM_003752027
17610361	4.3497	4.55269	1.04667	0.0363474	---	---
17610966	7.51848	7.8736	1.04723	0.0172791	---	ENSRNOT00000081762
17878870	6.64972	6.96698	1.04771	0.0357988	Zmat1	XM_002727625
17867300	9.11691	9.55188	1.04771	0.0257751	---	ENSRNOT00000041978
17600373	7.12827	7.47015	1.04796	0.0410175	---	---
17607939	5.95945	6.24643	1.04815	0.0385374	---	---
17646715	10.022	10.5099	1.04868	0.0272058	---	ENSRNOT00000077980
17801684	6.04785	6.34295	1.0488	0.0445086	---	NONRATT043531
17652606	5.40017	5.66642	1.0493	0.0432305	Kctd2	XM_006221035
17734805	8.61048	9.04247	1.05017	0.0368543	---	---
17817028	5.61316	5.89773	1.0507	0.0369166	---	---
17611052	4.52767	4.75832	1.05094	0.0438141	Taar8c	NM_175600
17690531	5.34931	5.62209	1.05099	0.0280754	---	ENSRNOT00000069124
17871554	6.6276	6.97503	1.05242	0.0140635	---	ENSRNOT00000060001
17880955	5.3653	5.64711	1.05253	0.0473692	RGD1564447	XM_001058987
17791413	6.60613	6.95315	1.05253	0.0110555	---	ENSRNOT00000035078
17818685	5.2434	5.51919	1.0526	0.0444901	Mir300	NR_031944
17771869	9.48551	9.99796	1.05402	0.0343816	---	ENSRNOT00000077371
17859645	10.518	11.0897	1.05436	0.040934	---	ENSRNOT00000083445
17624523	9.73123	10.2621	1.05455	0.0354719	---	ENSRNOT00000079288
17736690	9.73123	10.2621	1.05455	0.0354719	---	ENSRNOT00000079288
17739042	9.73123	10.2621	1.05455	0.0354719	---	ENSRNOT00000079288
17839395	9.73123	10.2621	1.05455	0.0354719	LOC102549144	XR_593658
17856988	9.73123	10.2621	1.05455	0.0354719	---	ENSRNOT00000079288
17638713	6.20393	6.5426	1.05459	0.029432	---	ENSRNOT00000090108
17789808	10.0956	10.647	1.05462	0.0252871	---	ENSRNOT00000087755
17876731	5.83825	6.15871	1.05489	0.0198803	RragB	NM_053972
17837695	6.18217	6.52433	1.05535	0.0104746	---	GENSCAN00000055264
17737281	5.73955	6.05936	1.05572	0.0455367	---	GENSCAN00000052391
17698231	4.99112	5.26989	1.05585	0.046028	Olr1643	NM_001000535
17668044	4.40049	4.64854	1.05637	0.0157998	Cldn14	NM_001013429
17664172	4.99354	5.27511	1.05639	0.0436102	Rab40b	NM_001107076
17602165	5.47394	5.78461	1.05675	0.0450376	---	---
17609811	5.77712	6.10768	1.05722	0.0492022	---	---
17847353	4.86267	5.14306	1.05766	0.0268864	---	---
17801023	7.80689	8.26545	1.05874	0.0397141	---	---
17600643	5.66533	5.99877	1.05886	0.00910058	---	---
17610157	5.66533	5.99877	1.05886	0.00910058	---	---
17609751	5.32124	5.63768	1.05947	0.0165651	---	---
17720684	5.64493	5.9817	1.05966	0.0426487	---	---
17799004	7.11543	7.54087	1.05979	0.0114098	---	---
17668348	5.61211	5.94831	1.05991	0.0340788	---	---
17872257	10.0881	10.6934	1.06001	0.0279709	---	ENSRNOT00000091839
17851407	5.00892	5.3098	1.06007	0.0394188	---	---
17661238	4.50409	4.7754	1.06024	0.0490448	Krt15	NM_001004022
17608697	5.76087	6.1079	1.06024	0.0240401	---	---
17842354	5.57636	5.91298	1.06036	0.0281044	---	ENSRNOT00000077761
17773120	6.82474	7.23854	1.06063	0.0013582	---	---
17723511	5.59531	5.93472	1.06066	0.0404456	Chsy3	XM_003753051
17883039	4.56972	4.84963	1.06125	0.00993107	---	XM_006227142
17773126	5.70097	6.05114	1.06142	0.0235473	---	---
17737579	5.18834	5.5089	1.06178	0.0461355	Slc2a2	NM_012879
17880483	4.9609	5.26823	1.06195	0.00898093	---	GENSCAN00000046877
17769288	5.05663	5.37042	1.06205	0.0193677	Tfap2c	NM_201420
17818430	5.80515	6.16812	1.06253	0.0142313	Mir341	NR_031785
17739249	5.81645	6.18237	1.06291	0.0109311	LOC499643	NM_001024301
17604759	6.57525	6.98949	1.063	0.0199297	---	---
17624595	5.94022	6.31461	1.06303	0.00388588	---	ENSRNOT00000049732
17686894	4.62851	4.92236	1.06349	0.0316139	Olr1592	NM_001000084
17744392	5.14264	5.46987	1.06363	0.00813821	S100z	NM_001191701
17874930	9.27923	9.87592	1.0643	0.0356033	---	ENSRNOT00000089543
17617570	4.55594	4.84922	1.06437	0.0337726	Mrps11	NM_001109148
17604125	5.34501	5.69376	1.06525	0.0256727	---	---
17883045	4.61249	4.91427	1.06543	0.000864622	---	XM_006227087
17746435	9.03246	9.62439	1.06553	0.0286058	---	ENSRNOT00000086840
17839345	5.48251	5.84193	1.06556	0.034145	Chadl	XM_008765807
17742274	4.98443	5.31126	1.06557	0.0315409	---	ENSRNOT00000036228
17729917	6.10947	6.51013	1.06558	0.0471252	LOC100362565	XM_008772566
17883232	5.71955	6.09575	1.06577	0.0380375	---	---
17880418	5.01006	5.34008	1.06587	0.0424204	LOC100909679	XM_006227225
17611073	8.27474	8.82059	1.06597	0.0349189	---	ENSRNOT00000084929
17603449	5.21603	5.56252	1.06643	0.0497767	---	---
17745564	8.42282	8.9861	1.06688	0.0222743	---	---
17617129	5.96412	6.36358	1.06698	0.00643931	---	GENSCAN00000059392
17605945	4.7897	5.1145	1.06781	0.0335576	---	---
17793995	6.98446	7.45886	1.06792	0.025737	---	ENSRNOT00000079576
17825181	6.98446	7.45886	1.06792	0.025737	---	ENSRNOT00000079576
17846174	4.71038	5.03063	1.06799	0.0347123	---	ENSRNOT00000087956
17848896	9.02292	9.63768	1.06813	0.0399279	---	ENSRNOT00000090176
17693741	4.93422	5.27165	1.06838	0.00468226	Dzip1-ps1	NR_003527
17843379	4.6277	4.94595	1.06877	0.0162161	Olr1308	NM_001000795
17844818	5.99439	6.41062	1.06944	0.0315166	---	---
17749165	4.41015	4.71727	1.06964	0.0382345	LOC102552651	XM_006232829
17701451	4.00888	4.28853	1.06976	0.0204842	---	---
17616728	5.8438	6.2535	1.07011	0.0155951	Nav2	NM_138529
17840724	6.3408	6.78536	1.07011	0.00273408	---	ENSRNOT00000079851
17600453	5.95661	6.37562	1.07034	0.0439626	---	---
17625288	4.83228	5.17512	1.07095	0.0191832	---	ENSRNOT00000018878
17675915	4.35218	4.66146	1.07106	0.0304598	Nptx2	NM_001034199
17760451	7.16662	7.67616	1.0711	0.0423703	---	ENSRNOT00000077431
17609781	4.89803	5.24656	1.07116	0.0220426	---	---
17880351	6.82992	7.31961	1.0717	0.00679633	LOC103693442	XM_008768233
17642793	3.99433	4.28118	1.07181	0.0268291	---	ENSRNOT00000079294
17642795	3.99433	4.28118	1.07181	0.0268291	---	ENSRNOT00000079294
17815821	5.76817	6.18439	1.07216	0.00332814	Nubpl	NM_001185025
17687414	5.9959	6.42912	1.07225	0.0184798	---	ENSRNOT00000034990
17604611	5.7632	6.17994	1.07231	0.0122481	---	---
17667929	5.53646	5.9393	1.07276	0.0465557	Dnajc28	NM_001014124
17658493	3.70085	3.97054	1.07287	0.03932	---	---
17654238	4.54265	4.87401	1.07295	0.0193413	---	NM_001108823
17605499	4.66555	5.00796	1.07339	0.0198462	---	---
17615597	6.68774	7.1809	1.07374	0.0287094	---	GENSCAN00000050015
17883744	3.62452	3.89188	1.07376	0.0396006	---	---
17606057	4.76423	5.11572	1.07378	0.0267372	---	---
17712710	5.26722	5.65597	1.07381	0.00201914	---	NM_001033074
17850594	4.65466	4.99859	1.07389	0.00217309	Dpy19l2	XM_002727030
17843371	7.32272	7.86687	1.07431	0.0233354	---	---
17878568	4.83634	5.19594	1.07435	0.0168636	RGD1562039	XM_008758487
17829929	5.54382	5.95637	1.07442	0.0165129	Psca	NM_001172106
17761617	4.33992	4.66309	1.07446	0.0247624	RGD1564854	NM_001109341
17683592	9.5202	10.2312	1.07468	0.0344048	---	ENSRNOT00000090418
17856249	6.63563	7.13276	1.07492	0.041803	---	ENSRNOT00000089261
17811793	5.44107	5.84959	1.07508	0.0437346	---	ENSRNOT00000085021
17751520	4.69714	5.05295	1.07575	0.0342621	---	ENSRNOT00000080251
17609597	5.44101	5.85371	1.07585	0.00446538	---	---
17881817	4.9229	5.29939	1.07648	0.049499	---	NM_001014004
17738052	4.08583	4.39901	1.07665	0.0367213	RGD1564378	ENSRNOT00000040470
17715197	4.16506	4.48737	1.07738	0.0302458	Cage1	NM_001012052
17674844	8.41444	9.06763	1.07763	0.042077	---	ENSRNOT00000077456
17843424	5.47267	5.90171	1.0784	0.000439829	Zfp202	NM_001109290
17619955	4.64905	5.01444	1.0786	0.0408086	Acsm2a	NM_144748
17746334	5.849	6.3096	1.07875	0.0111155	Chmp4c	NM_001017466
17724160	4.54072	4.90015	1.07916	0.00476537	---	GENSCAN00000034789
17808430	6.3805	6.88573	1.07918	0.0482977	---	---
17685836	5.50571	5.94359	1.07953	0.0305428	Zbtb37	NM_001107191
17631334	5.0843	5.48904	1.07961	0.0379106	Spred3	NM_001173344
17601001	5.87293	6.34084	1.07967	0.0491488	---	---
17601335	5.87293	6.34084	1.07967	0.0491488	---	---
17604409	5.71177	6.16758	1.0798	0.0206457	---	---
17818103	5.30411	5.72802	1.07992	0.00233493	Ppp4r4	NM_001134632
17843147	4.36185	4.71138	1.08013	0.0353058	Hepacam	XM_002729891
17697502	7.17955	7.75651	1.08036	0.0193319	---	ENSRNOT00000088809
17688647	4.46388	4.82545	1.081	0.0283762	Ccdc158	XM_006221687
17688094	5.18757	5.60886	1.08121	0.0109545	---	---
17883057	4.27085	4.6177	1.08122	0.000529216	---	XM_006227142
17883065	4.27085	4.6177	1.08122	0.000529216	---	XM_006227142
17763607	4.6139	4.98992	1.0815	0.00935698	Olr475	NM_001000686
17818965	7.60467	8.22463	1.08152	0.0411464	---	ENSRNOT00000088162
17607181	4.62046	4.99784	1.08167	0.0364735	---	---
17727441	4.16878	4.51027	1.08192	0.0268288	LOC100359752	XM_008772227
17764604	4.12357	4.46141	1.08193	0.0421682	Olr748	NM_001000365
17605527	5.19939	5.62656	1.08216	0.0353003	---	---
17741393	4.51213	4.88595	1.08285	0.0181058	Casq2	NM_017131
17605799	4.78987	5.19031	1.0836	0.0418133	---	---
17774100	8.19903	8.88847	1.08409	0.0436706	---	ENSRNOT00000077267
17873629	3.41344	3.70093	1.08422	0.026617	LOC100911639	XM_003754801
17619421	5.02126	5.44525	1.08444	0.00996978	Olr264	NM_001000999
17670118	8.60107	9.32737	1.08444	0.0310555	---	ENSRNOT00000077490
17831126	5.12709	5.56199	1.08482	0.00663444	43346	NM_019375
17791155	8.77852	9.52889	1.08548	0.0308634	---	NONRATT016812
17881241	4.72795	5.13301	1.08567	0.0496646	---	RPTR-CVE247372-1
17607757	5.04844	5.48353	1.08618	0.0441135	---	---
17609175	5.04844	5.48353	1.08618	0.0441135	---	---
17765685	4.41469	4.7963	1.08644	0.0339549	---	ENSRNOT00000069242
17674327	6.1425	6.67566	1.0868	0.0472783	---	ENSRNOT00000081564
17804303	4.63023	5.03338	1.08707	0.0339416	---	ENSRNOT00000070328
17724523	4.4016	4.78511	1.08713	0.0312237	LOC102553808	XR_342049
17835302	5.18827	5.64065	1.08719	0.0234819	Rpl31l3	ENSRNOT00000049211
17605931	4.89353	5.3209	1.08733	0.0340264	---	---
17635082	5.45945	5.93815	1.08768	0.0132748	B3gnt6	NM_001106211
17608579	5.46709	5.94783	1.08793	0.00440881	---	---
17766772	4.70435	5.11923	1.08819	0.013726	Otor	NM_001108960
17813079	4.45653	4.85039	1.08838	0.0488208	---	---
17850691	4.98148	5.42351	1.08873	0.0459732	---	ENSRNOT00000054317
17722250	6.61423	7.20189	1.08885	0.0268177	---	ENSRNOT00000091913
17616926	5.40404	5.8864	1.08926	0.0398125	---	ENSRNOT00000090628
17700729	4.5842	4.99376	1.08934	0.0323673	---	GENSCAN00000010074
17709862	7.6103	8.29197	1.08957	0.0398271	---	ENSRNOT00000077419
17647353	4.04317	4.40656	1.08988	0.0495497	Borcs6	NM_001017474
17609483	4.3527	4.74564	1.09027	0.0454869	---	---
17880220	4.09414	4.46477	1.09053	0.0341674	---	---
17839737	7.12727	7.77346	1.09066	0.035646	---	ENSRNOT00000082070
17882003	4.71615	5.14404	1.09073	0.0100609	---	NM_031806
17807281	4.49705	4.90513	1.09075	0.0162692	---	ENSRNOT00000082381
17710187	6.52351	7.11708	1.09099	0.0423451	---	ENSRNOT00000081926
17792133	4.24174	4.62834	1.09114	0.0482848	Smyd1	NM_001106595
17631210	5.28019	5.76215	1.09128	0.0353173	Ryr1	XM_008759293
17865872	4.26483	4.65471	1.09142	0.0226596	Fam124b	XM_001076121
17774236	3.64451	3.978	1.0915	0.031606	Olr604	NM_001000656
17683379	3.6228	3.95516	1.09174	0.0302656	---	GENSCAN00000028171
17622674	5.32753	5.81827	1.09211	0.0433712	---	---
17763041	5.4137	5.91544	1.09268	0.00426917	---	---
17772949	4.67929	5.11403	1.09291	0.0396482	Scn7a	NM_031686
17684462	5.9083	6.46135	1.09361	0.013952	---	ENSRNOT00000069877
17677535	4.56447	4.99176	1.09361	0.0324835	Atp6v0a2	ENSRNOT00000087698
17603153	5.08593	5.56348	1.0939	0.000859211	---	---
17869149	4.44877	4.86721	1.09406	0.00114249	LOC316124	NM_001134566
17614456	4.76108	5.21447	1.09523	0.0154224	B3gnt8	NM_001107492
17810192	4.17382	4.57159	1.0953	0.0437844	Mir30c1	NR_031839
17724639	6.77911	7.42829	1.09576	0.0086351	---	ENSRNOT00000081363
17829038	3.7304	4.08918	1.09618	0.0276814	Odf1	NM_024126
17727681	6.89949	7.56521	1.09649	0.0297767	---	ENSRNOT00000083178
17843197	4.98191	5.46493	1.09695	0.00902468	Vsig2	NM_001106812
17676538	4.01501	4.40475	1.09707	0.0123136	Mir25	NR_031829
17735559	4.83415	5.30665	1.09774	0.019449	Adamts6	XM_008760707
17607393	6.26647	6.88008	1.09792	0.0126466	---	---
17723641	4.71433	5.17678	1.0981	0.0485421	Pde6a	NM_001107386
17656531	4.7576	5.22543	1.09833	0.0279068	Obscn	XM_008767886
17838637	3.97907	4.37387	1.09922	0.0210223	Scrt1	NM_001130570
17801861	9.62782	10.5855	1.09947	0.0316455	---	ENSRNOT00000088888
17758137	4.61437	5.07381	1.09957	0.0321336	---	ENSRNOT00000092097
17600221	5.62126	6.18157	1.09968	0.0492425	---	---
17788294	4.93146	5.4232	1.09971	0.0341074	Rps4y2	NM_001109612
17864415	4.15239	4.56868	1.10025	0.00583645	Tmeff2	NM_001108795
17737211	3.99471	4.39741	1.10081	0.021258	Fabp9	NM_022854
17659949	3.91323	4.30866	1.10105	0.0321765	LOC102551403	XM_006220779
17698236	3.98605	4.3891	1.10111	0.038279	---	GENSCAN00000058642
17750982	4.0585	4.46897	1.10114	0.0462315	---	ENSRNOT00000090294
17626033	4.80009	5.28716	1.10147	0.00047476	Hps6	NM_181432
17603751	4.87158	5.37034	1.10238	0.0125882	---	---
17814960	4.58052	5.04981	1.10245	0.0467596	---	ENSRNOT00000087732
17764822	4.55307	5.02138	1.10286	0.00448036	---	---
17657284	4.33882	4.78821	1.10357	0.0241674	Dnah9	XM_002724507
17677771	4.82959	5.33049	1.10372	0.0495621	Lrrc43	NM_001170396
17880285	4.42871	4.88935	1.10401	0.00209351	LOC690138	XR_592743
17808373	4.24515	4.68724	1.10414	0.021247	---	ENSRNOT00000076789
17831177	6.39111	7.0568	1.10416	0.0172518	---	ENSRNOT00000078385
17844970	6.39111	7.0568	1.10416	0.0172518	---	ENSRNOT00000078385
17850645	3.94672	4.3588	1.10441	0.0372903	---	ENSRNOT00000090306
17756404	3.99355	4.4106	1.10443	0.0458146	Ly6g5c	NM_198739
17692574	7.38584	8.15822	1.10458	0.0105552	---	ENSRNOT00000082867
17723396	4.52372	4.99683	1.10458	0.0421458	Ctxn3	NM_001134696
17602687	4.26746	4.71558	1.10501	0.0208004	---	---
17699096	3.84089	4.24498	1.10521	0.0312108	---	---
17808857	4.68331	5.17739	1.1055	0.036852	---	---
17692576	7.40675	8.18967	1.1057	0.0117572	---	ENSRNOT00000085510
17602781	4.94098	5.46418	1.10589	0.0398109	---	---
17854027	4.58466	5.07097	1.10607	0.00490419	Tmod2	NM_031613
17785157	5.22666	5.78109	1.10608	0.0200541	---	ENSRNOT00000088858
17634958	4.40702	4.87458	1.10609	0.0464024	---	ENSRNOT00000087596
17605731	5.0982	5.64125	1.10652	0.0347896	---	---
17790891	3.4128	3.77686	1.10668	0.00848352	Prss37	NM_001108625
17881983	3.31548	3.66983	1.10688	0.0479018	---	NM_022679
17703439	5.00396	5.53932	1.10699	0.00703384	---	ENSRNOT00000084279
17880497	4.42787	4.90179	1.10703	0.0203243	---	---
17619502	9.07412	10.0478	1.1073	0.0365155	---	ENSRNOT00000087551
17857965	3.64546	4.03676	1.10734	0.0423395	RGD1562107	XM_001070946
17662644	4.62215	5.11933	1.10757	0.00264188	Cacng1	NM_019255
17882663	4.16681	4.61508	1.10758	0.00983934	---	NM_013120
17799408	5.28637	5.85601	1.10776	0.0330315	Mir3084c	NR_128676
17612972	4.61025	5.10752	1.10786	0.00418449	---	ENSRNOT00000053809
17629648	4.61025	5.10752	1.10786	0.00418449	---	ENSRNOT00000053809
17709291	4.21758	4.67552	1.10858	0.016026	Adprhl1	XM_006253439
17719505	7.40685	8.2153	1.10915	0.0194975	---	ENSRNOT00000081299
17712094	4.26457	4.73104	1.10938	0.0248661	---	ENSRNOT00000077407
17608095	4.67209	5.18437	1.10965	0.0396105	---	---
17645787	3.88099	4.30687	1.10973	0.0205127	Shroom1	XM_006220672
17816066	3.86508	4.29006	1.10995	0.0181996	---	GENSCAN00000051684
17712060	4.59166	5.09726	1.11011	0.021595	Pragmin	NM_001107315
17811325	4.49992	5.00018	1.11117	0.0491716	Catsper4	XM_002726602
17653713	4.02461	4.47251	1.11129	0.00751886	Atf7ip2	NM_001017471
17612139	7.59167	8.43807	1.11149	0.0248011	---	---
17810722	4.536	5.04427	1.11205	0.00136953	Gjb5	NM_019241
17735635	4.34975	4.83863	1.11239	0.0274189	---	GENSCAN00000028710
17608749	4.4968	5.00281	1.11253	0.0475106	---	---
17747002	3.99722	4.44782	1.11273	0.0393437	Il2	NM_053836
17751221	7.5489	8.40009	1.11276	0.0332787	---	ENSRNOT00000086241
17647227	4.72827	5.26238	1.11296	0.0101001	Mfsd6l	NM_001105787
17601743	4.25548	4.73775	1.11333	0.00512087	---	---
17793891	4.47926	4.987	1.11335	0.0392504	Atp2b2	NM_012508
17603085	4.30335	4.79163	1.11347	0.0464883	---	---
17725568	6.14356	6.84185	1.11366	0.0241106	---	NONRATT026534
17725255	3.96388	4.41495	1.1138	0.00507043	---	GENSCAN00000055442
17655264	4.56787	5.08774	1.11381	0.00943339	Ranbp17	NM_001106994
17723497	5.39861	6.01362	1.11392	0.0154408	---	GENSCAN00000027368
17733821	3.03663	3.38327	1.11415	0.0233627	---	---
17637632	6.98256	7.78095	1.11434	0.0109228	---	ENSRNOT00000085524
17751596	4.29229	4.78553	1.11491	0.0479111	---	NONRATT032352
17760106	4.58819	5.11629	1.1151	0.00210806	Kcnt1	NM_021853
17667474	4.74055	5.28717	1.11531	0.0314528	---	---
17875772	7.01292	7.8221	1.11538	0.0236193	---	---
17722258	6.3391	7.07348	1.11585	0.021365	---	ENSRNOT00000078524
17797445	4.12636	4.60453	1.11588	0.047671	Cngb3	NM_001271238
17620691	4.52158	5.04746	1.1163	0.00421871	Tbx6	NM_001108920
17630496	3.57246	3.98862	1.11649	0.0426377	RGD1564380	NM_001170329
17720057	4.87958	5.44986	1.11687	0.0105585	LOC100362965	XM_002725291
17831119	3.93473	4.39611	1.11726	0.00838447	Mir33	NR_031847
17621282	4.28049	4.78372	1.11756	0.0487078	Plpp4	NM_001191631
17670072	3.80985	4.25802	1.11764	0.00476748	---	---
17867541	4.71531	5.2711	1.11787	0.0384262	Vom2r76	NM_001099505
17711471	3.91393	4.37957	1.11897	0.0134009	Aadat	NM_017193
17623368	4.57998	5.12509	1.11902	0.0228506	Cdc42bpg	NM_001130013
17878615	3.74365	4.19031	1.11931	0.0431792	Satl1	NM_001163543
17871383	3.62401	4.05887	1.12	0.0473154	---	ENSRNOT00000086074
17871394	3.62401	4.05887	1.12	0.0473154	---	ENSRNOT00000086074
17624985	4.85623	5.44003	1.12022	0.00648668	Mbl2	NM_022704
17805604	6.4181	7.19074	1.12038	0.015744	---	ENSRNOT00000085342
17702281	3.98989	4.4707	1.12051	0.000624514	---	GENSCAN00000019563
17615650	5.75221	6.44982	1.12128	0.0172385	---	ENSRNOT00000085592
17603977	5.42067	6.08379	1.12233	0.0422291	---	---
17855784	3.63716	4.08632	1.12349	0.0496993	Mir3555	NR_037333
17610855	4.22819	4.75092	1.12363	0.00539785	---	ENSRNOT00000087422
17801876	3.43464	3.85947	1.12369	0.038011	LOC102547626	XM_008764119
17878689	5.16749	5.80797	1.12394	0.0258154	---	ENSRNOT00000082466
17849503	3.92088	4.40835	1.12433	0.00990101	Cntn5	NM_053746
17867031	4.20079	4.72371	1.12448	0.0211418	Mtcl1	XM_002727262
17856610	4.34298	4.88488	1.12478	0.00362586	Lyzl4	NM_001246183
17817269	4.4179	4.96945	1.12484	0.00581887	Papln	XM_006225840
17880638	3.40819	3.83512	1.12527	0.0310061	---	GENSCAN00000050571
17808103	5.34227	6.01169	1.12531	0.01546	---	ENSRNOT00000082400
17831219	3.55311	3.99897	1.12548	0.0331099	Mpped1	NM_001130569
17660303	4.2074	4.73579	1.12558	0.0103902	Itga3	XM_003750907
17873757	5.33216	6.0069	1.12654	0.016241	---	ENSRNOT00000085780
17740709	5.13378	5.78344	1.12655	0.0214362	---	ENSRNOT00000081119
17710348	3.78837	4.26954	1.12701	0.0348683	---	NM_001134849
17791722	3.89543	4.39312	1.12776	0.0177134	---	---
17801863	7.916	8.932	1.12835	0.0161133	---	ENSRNOT00000083798
17812310	3.03327	3.42342	1.12863	0.0338538	RGD1559644	XM_001074380
17604993	4.1879	4.72958	1.12935	0.0427032	---	---
17767250	3.44731	3.89321	1.12935	0.0367227	---	GENSCAN00000040644
17856878	3.95893	4.47429	1.13018	0.0195071	Slc5a7	NM_053521
17678750	4.80344	5.43105	1.13066	0.0111839	---	ENSRNOT00000084763
17741423	2.53713	2.86867	1.13068	0.0418439	---	ENSRNOT00000087315
17843365	3.81605	4.31537	1.13085	0.013904	Olr1271	NM_173300
17707014	4.45177	5.03634	1.13131	0.0159801	Kcnn1	NM_019313
17640803	4.00667	4.5341	1.13164	0.0170015	Olr325	NM_001000247
17608727	4.32376	4.89337	1.13174	0.014243	---	---
17616249	4.05326	4.58754	1.13182	0.00898174	Tead2	NM_001107512
17734026	3.78162	4.28208	1.13234	0.0241103	---	ENSRNOT00000058502
17851866	3.42672	3.88522	1.1338	0.049379	---	ENSRNOT00000089787
17881048	3.80393	4.31308	1.13385	0.0471876	RGD1566387	XM_006227517
17825894	4.06693	4.61183	1.13398	0.0352458	---	---
17665377	4.3142	4.89246	1.13404	0.0441424	Zpld1	XM_006221171
17880802	3.67352	4.1673	1.13441	0.0098674	---	---
17737657	3.80471	4.31864	1.13508	0.0210855	Actrt3	NM_001108942
17842249	3.72192	4.22474	1.1351	0.0145555	Pcbp1	ENSRNOT00000045980
17636806	4.75191	5.39429	1.13518	0.0273151	---	ENSRNOT00000084089
17742929	3.35022	3.80601	1.13605	0.0444395	---	GENSCAN00000019329
17644642	3.74436	4.25814	1.13721	0.0440682	Mslnl	XM_008767615
17790133	3.84317	4.37434	1.13821	0.0235306	Pax4	NM_031799
17766921	3.48747	3.97217	1.13898	0.0474586	---	---
17875323	3.61479	4.11978	1.1397	0.041257	---	GENSCAN00000042974
17765469	4.95685	5.6495	1.13974	0.0343074	---	ENSRNOT00000079001
17667697	3.84292	4.38193	1.14026	0.0169773	---	ENSRNOT00000079873
17793700	3.89465	4.44227	1.14061	0.0279029	---	ENSRNOT00000086281
17828153	6.22254	7.10037	1.14107	0.0289519	---	ENSRNOT00000083385
17601685	4.5956	5.25015	1.14243	0.0123804	---	---
17667433	4.82857	5.51713	1.1426	0.017745	---	ENSRNOT00000081657
17764480	7.12546	8.14234	1.14271	0.0377913	---	ENSRNOT00000085457
17860243	7.12546	8.14234	1.14271	0.0377913	---	ENSRNOT00000085457
17841793	4.03352	4.60995	1.14291	0.00467562	---	---
17757282	3.38378	3.86963	1.14358	0.0264095	---	ENSRNOT00000089280
17642925	4.4172	5.05177	1.14366	0.0100892	Gucy2g	NM_139042
17675697	7.89173	9.02787	1.14397	0.0401511	---	ENSRNOT00000081251
17689669	3.88981	4.45159	1.14442	0.0152468	Gabra2	NM_001135779
17664503	3.96631	4.53963	1.14455	0.0179566	Krtap13-2	NM_001109325
17761755	3.60498	4.12762	1.14498	0.00144587	Olr396	NM_001000831
17600679	4.39078	5.0302	1.14563	0.0423293	---	---
17610193	4.39078	5.0302	1.14563	0.0423293	---	---
17789272	3.43384	3.93404	1.14567	0.0290249	RGD1564345	NM_001077681
17640851	3.10091	3.55382	1.14606	0.0373955	Olr343	NM_001000254
17871530	4.02536	4.61684	1.14694	0.0195861	Gucy2f	NM_053831
17666434	3.72886	4.27969	1.14772	0.0254393	---	ENSRNOT00000054450
17752323	3.89158	4.46849	1.14825	0.0236319	Olr1744	NM_001001426
17607967	4.75883	5.46484	1.14836	0.0120327	---	---
17608413	5.00924	5.75359	1.1486	0.0144524	---	---
17735051	3.27056	3.76192	1.15024	0.0457584	---	GENSCAN00000056891
17836828	3.94025	4.53261	1.15034	0.044531	Fbxo43	NM_001012117
17609259	3.83404	4.41154	1.15062	0.0447727	---	---
17817742	3.25731	3.74943	1.15108	0.0405446	---	---
17602185	3.91005	4.50344	1.15176	0.0427245	---	---
17736124	4.86739	5.60968	1.1525	0.0100652	---	ENSRNOT00000078081
17881179	3.75119	4.32532	1.15305	0.0160704	---	RPTR-AE009032-1
17872079	3.65564	4.21771	1.15375	0.00811361	---	ENSRNOT00000088318
17876868	5.36595	6.19772	1.15501	0.0052341	---	---
17640636	3.31548	3.83025	1.15526	0.0406903	Ms4a18	XM_008760254
17644371	4.54403	5.25157	1.15571	0.00899196	Hs3st6	NM_001109450
17871172	3.74062	4.32446	1.15608	0.00467749	Eras	NM_001109375
17714226	2.36758	2.73952	1.1571	0.0328438	---	ENSRNOT00000090825
17872953	4.06642	4.7077	1.1577	8.92379e-05	---	ENSRNOT00000036763
17880162	3.18849	3.69421	1.15861	0.029399	---	GENSCAN00000000790
17762099	4.11042	4.76513	1.15928	0.0137069	Lypd6b	NM_001134580
17700732	3.55291	4.11976	1.15954	0.0144836	---	GENSCAN00000010065
17785017	2.97549	3.45317	1.16054	0.0115286	---	---
17634978	2.517	2.92296	1.16129	0.0407818	---	ENSRNOT00000069872
17667409	4.09864	4.76175	1.16179	0.0241582	---	---
17640302	5.28285	6.15019	1.16418	0.00107356	Gng3	NM_053658
17624216	5.02972	5.86236	1.16554	0.0224152	---	ENSRNOT00000080847
17711151	2.33158	2.7183	1.16586	0.0303156	---	ENSRNOT00000082048
17863710	3.83034	4.4657	1.16587	0.0109061	---	ENSRNOT00000089558
17879617	3.44291	4.01984	1.16757	0.00896162	Mir743a	NR_032293
17778090	3.03595	3.54522	1.16774	0.0440364	LOC296235	NM_001037350
17605627	4.04398	4.72484	1.16836	0.0443793	---	---
17863213	4.09046	4.77991	1.16855	0.00382989	Crisp4	NM_001039393
17808186	3.42827	4.00643	1.16865	0.0177957	---	ENSRNOT00000085105
17748264	4.23681	4.95332	1.16911	0.0037457	Rbm46	NM_001135717
17815471	3.28994	3.8464	1.16914	0.0182588	Agr3	NM_001106724
17875942	3.76142	4.40104	1.17005	0.0217652	---	GENSCAN00000045608
17872106	3.76468	4.41465	1.17265	0.00388933	Egfl6	NM_001108254
17726532	3.55171	4.1656	1.17284	0.00866683	Mir378	NR_032139
17779149	3.59683	4.21907	1.173	0.0380009	Wfdc5	NM_001106538
17787463	3.3232	3.90095	1.17385	0.000739386	---	NONRATT042292
17668828	5.32435	6.25131	1.1741	0.016211	---	---
17730310	3.69083	4.33408	1.17429	0.0116225	Cntnap4	NM_001107432
17874091	3.57852	4.20284	1.17446	0.0256265	Nrk	NM_001191797
17604681	4.38078	5.14932	1.17543	0.0474416	---	---
17607075	3.48561	4.09904	1.17599	0.00174067	---	---
17739110	3.51314	4.1321	1.17618	0.0274009	---	GENSCAN00000052555
17735918	3.00977	3.54374	1.17741	0.0288809	---	ENSRNOT00000069349
17774120	3.5577	4.19046	1.17786	0.0317182	Olr482	NM_001000561
17666753	3.06247	3.61016	1.17884	0.00793881	---	ENSRNOT00000053366
17809493	3.44579	4.06272	1.17904	0.0470994	Lurap1	NM_001109263
17633381	3.78233	4.46469	1.18041	0.00663134	---	ENSRNOT00000088934
17703186	2.94321	3.47905	1.18206	0.0350545	Gzmf	NM_153466
17879340	3.36461	3.98002	1.18291	0.00910292	Mir19b2	NR_031821
17602747	4.40644	5.21352	1.18316	0.0296908	---	---
17609245	4.03588	4.77982	1.18433	0.00718733	---	---
17819748	3.05499	3.62644	1.18705	0.0299732	---	---
17686241	2.94083	3.49359	1.18796	0.0497	---	---
17738332	3.44054	4.08809	1.18821	0.00260702	---	---
17667230	4.02987	4.79209	1.18914	0.00533557	Ccdc116	NM_001024740
17606001	2.93157	3.4867	1.18936	0.0282062	---	---
17614858	4.08786	4.86674	1.19054	0.0319823	Rps16	NM_001169146
17876534	2.72234	3.24218	1.19095	0.0439095	Mir1912	NR_037370
17779671	3.06758	3.6565	1.19198	0.0330635	Zfp93	NM_001106546
17760437	3.67061	4.37761	1.19261	0.0230839	Dbh	NM_013158
17755316	3.45335	4.11985	1.193	0.0338142	---	---
17870578	3.30227	3.94412	1.19437	0.0401528	Akap14	NM_021703
17719593	3.50278	4.18568	1.19496	0.0260945	---	ENSRNOT00000083158
17603243	4.15489	4.96728	1.19553	0.0171794	---	---
17669344	2.72873	3.26348	1.19597	0.00667156	---	ENSRNOT00000090043
17601643	5.02731	6.01542	1.19655	0.0178863	---	---
17824346	3.14291	3.76127	1.19675	0.0410387	Mir3592	NR_037393
17737823	2.53112	3.0392	1.20073	0.0330394	---	ENSRNOT00000081740
17709056	2.99414	3.59676	1.20127	0.0426043	Defb38	NM_001037552
17825916	3.3419	4.01707	1.20203	0.00179617	---	NM_001001365
17601899	4.22273	5.07709	1.20232	0.0105637	---	---
17857881	3.04349	3.66347	1.20371	0.0222031	LOC102553880	XM_008757998
17624768	2.94317	3.54318	1.20387	0.019836	---	---
17832714	2.83048	3.40787	1.20399	0.0123102	Hoxc10	NM_001308636
17882581	2.93044	3.52908	1.20428	0.0440525	---	---
17875518	2.67748	3.23101	1.20674	0.0374313	---	ENSRNOT00000087693
17763760	3.37487	4.07849	1.20849	0.0197246	Olr725	NM_001000514
17836105	3.12636	3.7866	1.21119	0.0262565	LOC100362798	ENSRNOT00000034088
17618069	2.42425	2.93721	1.2116	0.0345101	---	---
17876548	2.4097	2.92186	1.21254	0.0270679	---	ENSRNOT00000004806
17842260	2.85285	3.45961	1.21269	0.0455879	Olr1169	NM_001000434
17794121	2.92479	3.54734	1.21286	0.0392411	RGD1563294	XR_346076
17624333	3.634	4.40844	1.21311	0.0179532	Olr347	NM_001000758
17802718	2.60468	3.16129	1.21369	0.0224257	Trnp1	XM_001069068
17640069	3.95564	4.80175	1.2139	0.0321727	---	---
17882597	2.9718	3.60772	1.21399	0.0232002	---	---
17608539	2.92556	3.55734	1.21595	0.0180292	---	---
17873405	2.65452	3.22826	1.21614	0.00830997	---	GENSCAN00000002765
17604269	4.14985	5.04865	1.21659	0.0234713	---	---
17881181	2.86575	3.49157	1.21838	0.0320257	---	RPTR-AF062997-1
17881253	3.28402	4.00374	1.21916	0.0115781	---	RPTR-J01347-3
17805654	3.40154	4.14962	1.21992	0.0281732	RGD1563405	XR_592402
17707450	4.30723	5.25509	1.22006	0.025768	---	ENSRNOT00000079119
17705169	2.96816	3.6252	1.22136	0.0174697	---	---
17607365	2.99235	3.65696	1.22211	0.0280201	---	---
17679279	3.82334	4.67496	1.22274	0.00284867	---	---
17683561	3.01891	3.69389	1.22359	0.0280951	---	GENSCAN00000000357
17859208	2.9128	3.56511	1.22395	0.0222265	---	ENSRNOT00000087343
17701826	3.95338	4.84208	1.22479	0.0488097	---	ENSRNOT00000052658
17609381	4.23798	5.19425	1.22564	0.0397297	---	---
17754697	2.95304	3.62636	1.22801	0.0449936	---	ENSRNOT00000000780
17877689	2.66282	3.28118	1.23222	0.048841	---	ENSRNOT00000082581
17881557	3.49414	4.31525	1.235	0.0117137	---	---
17695867	5.73371	7.08374	1.23545	0.0144232	---	ENSRNOT00000082222
17799873	2.72087	3.36773	1.23774	0.030502	---	ENSRNOT00000090826
17611075	2.03114	2.51872	1.24005	0.0398427	---	---
17622593	3.46874	4.30886	1.2422	0.00555125	Shank2	NM_001004133
17852932	2.95392	3.67819	1.24519	0.0219061	---	ENSRNOT00000087701
17602195	3.31976	4.13562	1.24576	0.0389248	---	---
17600561	4.68915	5.85347	1.2483	0.0148201	---	---
17610075	4.68915	5.85347	1.2483	0.0148201	---	---
17602305	3.58389	4.47521	1.2487	0.0403344	---	---
17604285	4.30918	5.38249	1.24907	0.0401964	---	---
17787645	2.72422	3.40643	1.25042	0.00569604	Tas2r120	NM_001080937
17661181	3.08154	3.85998	1.25261	0.0375683	---	NM_001008819
17698466	2.31506	2.90304	1.25398	0.0467254	---	GENSCAN00000019573
17664755	1.88294	2.36714	1.25715	0.0337005	Mir802	NR_032753
17772066	3.3882	4.26553	1.25894	0.049976	---	ENSRNOT00000088810
17608189	3.72666	4.69955	1.26106	0.0304705	---	---
17797464	2.89429	3.66401	1.26594	0.0245923	---	---
17689949	1.90349	2.41416	1.26828	0.0424605	---	ENSRNOT00000090879
17812315	2.38962	3.0314	1.26857	0.023453	LOC691196	XM_001077182
17602973	3.44662	4.37537	1.26947	0.0319205	---	---
17672685	3.25138	4.12823	1.26968	0.00685693	---	---
17795746	2.74236	3.48465	1.27067	0.0492132	Tas2r114	ENSRNOT00000007497
17606827	2.14833	2.73388	1.27256	0.0369517	---	---
17797639	2.43821	3.10291	1.27262	0.0286728	---	---
17742235	3.32644	4.23503	1.27314	0.00610581	Plppr5	NM_001107720
17671409	2.38038	3.03642	1.2756	0.0273598	---	---
17605345	2.66568	3.40042	1.27563	0.00655955	---	---
17635565	3.28067	4.18632	1.27606	0.0261173	Olr104	NM_001000145
17881739	2.59473	3.31145	1.27622	0.001837	---	---
17604805	3.52889	4.50421	1.27638	0.0138296	---	---
17785904	2.17009	2.76998	1.27644	0.0411522	---	---
17689259	1.50554	1.92301	1.27729	0.0314197	---	ENSRNOT00000086649
17763974	2.57175	3.28697	1.27811	0.0316115	---	ENSRNOT00000091926
17855794	3.16675	4.04983	1.27886	0.0336559	P4htm	XM_001075237
17728627	2.91618	3.73546	1.28094	0.0348278	Best2	NM_001108895
17763595	2.48724	3.18736	1.28148	0.0297281	Olr468	NM_001001124
17781965	2.57849	3.30544	1.28193	0.00320886	---	ENSRNOT00000091563
17834277	1.72455	2.21079	1.28195	0.0150413	---	ENSRNOT00000090088
17764621	2.81856	3.61493	1.28254	0.000520839	Olr757	NM_001000613
17853515	2.47625	3.18766	1.28729	0.0458654	---	ENSRNOT00000084254
17660859	1.88714	2.43069	1.28803	0.0273054	---	ENSRNOT00000086648
17874448	2.58755	3.33298	1.28808	0.0294704	LOC317588	XR_147211
17682390	2.53608	3.27041	1.28955	0.0299668	---	ENSRNOT00000086901
17791990	5.54765	7.15712	1.29012	0.0216651	---	ENSRNOT00000078895
17607189	3.13809	4.05271	1.29145	0.00970032	---	---
17677988	3.40904	4.40743	1.29286	0.0105267	---	---
17724218	4.34761	5.6338	1.29584	0.0118205	---	ENSRNOT00000091851
17705150	2.89762	3.75588	1.2962	0.0391578	---	---
17666531	3.29539	4.29138	1.30224	0.01627	Tmem207	XM_002724750
17607357	3.34904	4.36945	1.30469	0.0100837	---	---
17604569	3.42872	4.47719	1.30579	0.0227662	---	---
17862492	2.76689	3.62488	1.31009	0.0405573	---	ENSRNOT00000080225
17747179	2.43003	3.19191	1.31353	0.0457358	LOC102548017	XM_006227109
17607041	3.02994	3.98851	1.31637	0.0223389	---	---
17656473	2.26776	2.99328	1.31993	0.0213251	Olr1422	NM_001000007
17808681	2.86207	3.77805	1.32004	0.0297569	---	ENSRNOT00000082265
17823045	1.89116	2.49948	1.32167	0.0193405	---	---
17786457	3.16989	4.20959	1.32799	0.00421136	---	ENSRNOT00000083862
17600567	1.76179	2.35059	1.33421	0.0266377	---	---
17610081	1.76179	2.35059	1.33421	0.0266377	---	---
17863648	2.60231	3.49256	1.3421	0.0319998	---	ENSRNOT00000083847
17778053	2.06288	2.76924	1.34241	0.0333028	RGD1563136	XM_001057954
17876562	3.03936	4.08661	1.34456	0.000169452	---	---
17779182	1.47927	1.99404	1.34799	0.0441183	Slpil3	NM_001008873
17714890	1.60044	2.15794	1.34835	0.0427678	Mirlet7f-1	NR_031806
17601625	2.19575	2.96231	1.34911	0.0323959	---	---
17609625	2.81991	3.81191	1.35178	0.0117913	---	---
17870901	3.46405	4.6885	1.35347	0.0147523	---	---
17687846	2.60816	3.53407	1.355	0.0263606	Tmed11	XM_001071744
17842256	2.87724	3.90151	1.35599	0.00676011	Olr1165	NM_001000868
17763636	2.65966	3.60943	1.3571	0.00231058	---	ENSRNOT00000078527
17883011	1.85723	2.53002	1.36226	0.0151161	---	---
17798910	1.71561	2.33848	1.36306	0.0196683	LOC500460	XM_003749941
17605419	2.05311	2.8095	1.36841	0.0457948	---	---
17839704	2.81639	3.85728	1.36958	0.000226676	Mir1249	NR_037390
17877899	2.69523	3.69455	1.37077	0.00335768	Asb12	NM_001037367
17778058	1.65826	2.27391	1.37126	0.0266276	---	---
17607667	3.1377	4.3133	1.37467	0.0183347	---	---
17609085	3.1377	4.3133	1.37467	0.0183347	---	---
17626334	2.69772	3.70957	1.37507	0.022671	---	ENSRNOT00000080375
17763192	1.65255	2.28087	1.38021	0.0049823	---	---
17629072	2.10486	2.97999	1.41577	0.0252358	---	ENSRNOT00000033187
17868539	1.54216	2.18558	1.41723	0.0426494	LOC100911408	XR_594200
17806396	2.40329	3.42392	1.42468	0.0134443	Mir873	NR_032297
17605093	2.75813	3.96327	1.43694	0.0239305	---	---
17685342	3.21625	4.63214	1.44023	0.029873	Rgsl1	XM_008769723
17825876	1.58017	2.29002	1.44922	0.0332156	Olr950	NM_001001370
17604199	2.48601	3.61631	1.45467	0.0379676	---	---
17605313	2.82494	4.13977	1.46544	0.0412328	---	---
17620522	2.31364	3.39106	1.46568	0.0469742	LOC691716	XR_085721
17616918	2.00061	2.95346	1.47628	0.00590162	---	---
17791727	2.3936	3.55631	1.48576	0.0208561	---	ENSRNOT00000080282
17697318	1.65904	2.47701	1.49304	0.0111916	---	ENSRNOT00000049746
17792068	1.49103	2.23269	1.49742	0.0459037	---	---
17777957	2.56046	3.88048	1.51554	0.0170153	---	---
17797387	1.44147	2.19172	1.52048	0.0284463	---	ENSRNOT00000085729
17791729	1.08696	1.65751	1.5249	0.0306249	---	ENSRNOT00000081947
17606029	2.21652	3.42484	1.54515	0.0220047	---	---
17786036	1.88745	2.93824	1.55673	0.00991658	---	ENSRNOT00000077907
17865434	2.36751	3.70933	1.56677	0.0114579	---	ENSRNOT00000069095
17704830	1.1965	1.87789	1.56949	0.0490554	---	---
17638072	1.16272	1.86857	1.60706	0.0354427	Mir202	NR_032736
17621679	1.86392	3.00702	1.61327	0.0445707	---	ENSRNOT00000082706
17806163	1.55398	2.52437	1.62445	0.00450033	---	ENSRNOT00000090806
17837272	1.15573	1.93042	1.6703	0.0425364	---	GENSCAN00000011919
17777472	1.18917	2.00752	1.68817	0.0093836	RGD1564425	ENSRNOT00000058238
17784332	1.40473	2.4109	1.71628	0.00996301	---	---
17612416	1.64937	2.84455	1.72463	0.00252654	Vom1r3	NM_001009517
17603731	2.20523	3.81644	1.73063	0.0356822	---	---
17658498	1.74176	3.03827	1.74437	0.0153071	Olr1498	NM_001000030
17861793	1.61502	2.82293	1.74792	0.00840476	---	ENSRNOT00000085771
17861862	2.60903	4.75467	1.82239	0.00934391	---	ENSRNOT00000054649
17872998	0.985847	1.86441	1.89117	0.0498828	Mir3573	NR_037364
17711284	1.48425	2.84179	1.91463	0.000446684	---	ENSRNOT00000070760
17689442	1.27554	2.44354	1.9157	0.035797	LOC100363494	XM_002728110
17652674	0.572302	1.11991	1.95686	0.0291681	---	ENSRNOT00000079591
17602067	1.58605	3.13914	1.97921	0.0337687	---	---
17664440	1.47866	3.07119	2.07701	0.00317749	---	---
17665185	0.944845	1.96933	2.08429	0.000466705	---	ENSRNOT00000089069
17832363	1.76193	3.78696	2.14932	0.0196887	---	---
17651099	0.925202	2.09405	2.26334	0.0234584	---	ENSRNOT00000091580
17602075	1.04127	2.35881	2.26532	0.0114188	---	---
17780056	1.52503	3.4621	2.27018	0.00988805	---	---
17880186	0.963152	2.23307	2.3185	0.00513038	Olr1471	NM_001000722
17880691	0.963152	2.23307	2.3185	0.00513038	---	NM_001000722
17629276	0.511919	1.1914	2.32731	0.0377734	Mir294	NR_032761
17723744	0.844598	2.12589	2.51705	0.00830547	---	---
17602597	1.10206	3.0315	2.75074	0.00368791	---	---
17654267	0.259524	0.734655	2.83078	0.0141099	---	ENSRNOT00000090974
17780194	0.698411	2.00017	2.86388	0.012425	---	ENSRNOT00000090607
17849291	0.594716	2.0484	3.44433	0.0116862	---	ENSRNOT00000091366
17606309	0.450281	1.59931	3.5518	0.0409314	---	---
17824832	0.788012	2.85524	3.62335	0.00515466	---	GENSCAN00000014518
17604911	0.413148	2.02802	4.9087	0.006525	---	---
17604685	0.409492	2.09689	5.12071	0.000371596	---	---
17604483	0.162217	2.58032	15.9066	0.0031761	---	---
17735454	0.0502371	1.03854	20.6729	0.0173996	---	ENSRNOT00000086153
17764253	0.000520964	0.975348	1872.2	0.027086	---	---

## Sheet: male (BPA0.5+BPA50)
Probe_ID	Male Control, MC (avg exp)	Male BPA, mBPA(0.5+50) (avg exp)	mBPA(0.5+50) vs MC (fold change)	mBPA(0.5+50) vs MC (adj p-value)	Gene Symbol	mRNA Accession		x
17696707	1.09503	0.00122604	-893.147	0.00629989	---	---
17818435	1.7341	0.142046	-12.208	0.0023515	Mir370	NR_032113
17607371	1.80337	0.198832	-9.06981	0.0227883	---	---
17866861	1.73381	0.375039	-4.62301	0.0055696	---	ENSRNOT00000080255
17676821	2.48568	0.935396	-2.65735	0.0019032	---	XM_002727483
17700872	1.84101	0.712833	-2.58266	0.0205275	---	ENSRNOT00000089058
17720295	3.15342	1.30053	-2.42471	0.0249127	---	---
17607491	2.65311	1.1628	-2.28166	0.0425955	---	---
17608909	2.65311	1.1628	-2.28166	0.0425955	---	---
17607047	3.69931	1.65169	-2.23971	0.0477033	---	---
17652674	2.1791	0.995466	-2.18903	0.0108012	---	ENSRNOT00000079591
17723022	2.85076	1.3167	-2.16508	0.00726434	---	ENSRNOT00000091214
17702368	2.5019	1.23309	-2.02896	0.018938	---	---
17759327	2.79499	1.38248	-2.02173	0.0414102	---	GENSCAN00000002163
17755805	3.02844	1.49989	-2.01912	0.0262731	---	ENSRNOT00000081975
17698991	2.14386	1.06855	-2.00633	0.049308	RGD1565713	ENSRNOT00000048255
17825873	1.91082	0.983591	-1.9427	0.0143154	---	---
17822060	1.60475	0.835996	-1.91957	0.00586864	---	---
17823578	3.0779	1.68713	-1.82434	0.00123731	---	ENSRNOT00000054608
17722302	2.18237	1.2034	-1.81351	0.0406988	---	ENSRNOT00000070204
17828428	2.72483	1.50703	-1.80808	0.0493795	---	---
17734970	5.01299	2.93029	-1.71075	0.0468529	---	---
17882901	5.01299	2.93029	-1.71075	0.0468529	---	---
17758831	2.09443	1.24391	-1.68374	0.00526729	---	---
17604555	4.33491	2.57565	-1.68304	0.021866	---	---
17607833	3.96206	2.36656	-1.67418	0.0375962	---	---
17607885	3.96206	2.36656	-1.67418	0.0375962	---	---
17872929	3.38617	2.02545	-1.67181	0.0232862	---	ENSRNOT00000085184
17751284	2.67889	1.61183	-1.66201	0.0243175	---	GENSCAN00000028253
17744446	3.60459	2.20224	-1.63678	0.00845269	---	ENSRNOT00000063717
17698547	2.71862	1.66156	-1.63618	0.00354678	---	---
17833196	3.21228	1.96845	-1.63188	0.00528839	---	NM_001001367
17813508	3.46766	2.21804	-1.56339	0.000450619	---	ENSRNOT00000087435
17634774	3.08814	1.98572	-1.55517	0.0210916	Olr27	NM_001000936
17738640	2.87957	1.85352	-1.55357	0.0205115	---	ENSRNOT00000078590
17704845	2.3576	1.52361	-1.54737	0.00283637	---	ENSRNOT00000088841
17814060	3.36134	2.17417	-1.54603	0.0348753	---	GENSCAN00000041783
17818250	3.10382	2.03617	-1.52435	0.0239313	---	---
17667435	2.66277	1.7611	-1.51199	0.00726896	---	ENSRNOT00000090829
17713758	1.95864	1.29785	-1.50914	0.0364958	---	ENSRNOT00000085604
17641707	3.09096	2.05349	-1.50522	0.026148	---	ENSRNOT00000089137
17633641	2.5347	1.6916	-1.49841	0.031444	RGD1561206	ENSRNOT00000021855
17789165	2.31283	1.54974	-1.4924	0.0415799	Mir879	NR_032260
17604585	3.28145	2.21161	-1.48374	0.019998	---	---
17683397	2.15063	1.45387	-1.47924	0.00724742	---	ENSRNOT00000091118
17604587	4.2625	2.89795	-1.47087	0.0481332	---	---
17607021	4.25737	2.91224	-1.46189	0.0172013	---	---
17619058	4.33544	2.99268	-1.44868	0.0204132	---	ENSRNOT00000084931
17746449	3.01761	2.08453	-1.44762	0.0247567	---	GENSCAN00000037521
17879293	2.91943	2.06931	-1.41082	0.0405166	---	ENSRNOT00000042507
17800491	3.48408	2.47174	-1.40957	0.0461757	---	GENSCAN00000028827
17628980	4.06448	2.89806	-1.40248	0.0112693	Mir3596c	NR_037379
17817740	3.57685	2.55444	-1.40025	0.0160155	---	ENSRNOT00000053416
17808299	2.62499	1.88014	-1.39617	0.0130278	---	ENSRNOT00000063530
17712348	4.14432	2.98995	-1.38608	0.0023427	---	ENSRNOT00000079003
17619140	4.37796	3.16006	-1.3854	0.0298113	Olr143	NM_001000163
17814007	4.50392	3.25476	-1.38379	0.0443456	---	---
17818647	2.7868	2.02281	-1.37769	0.0174966	Mir379	NR_032124
17862543	3.05167	2.223	-1.37277	0.0271899	---	ENSRNOT00000080718
17723017	3.16236	2.30675	-1.37091	0.0237072	---	ENSRNOT00000079804
17676941	3.36708	2.46416	-1.36642	0.0291517	---	ENSRNOT00000082811
17706552	3.96092	2.90419	-1.36387	0.0466794	---	---
17658477	3.97874	2.91914	-1.36299	0.0480333	Olr1471	NM_001000722
17613818	4.23332	3.1264	-1.35405	0.0156545	Ceacam11	NM_001025404
17605755	4.00476	2.96473	-1.3508	0.0258613	---	---
17664511	3.84489	2.85146	-1.34839	0.0182473	---	GENSCAN00000007349
17858567	3.56715	2.64627	-1.34799	0.000346813	---	ENSRNOT00000069857
17879629	2.44172	1.81794	-1.34313	0.0402552	Mir3551	NR_037327
17612661	3.23624	2.41136	-1.34208	0.0439754	Vom2r-ps39	XR_593754
17739279	3.25386	2.42487	-1.34187	0.0132256	---	ENSRNOT00000078566
17878331	3.02354	2.26728	-1.33355	0.0269695	Mir384	NR_032273
17671409	3.5512	2.66618	-1.33194	0.021792	---	---
17837103	3.87829	2.92011	-1.32813	0.0309384	---	---
17609891	5.03526	3.79197	-1.32788	0.0115677	---	---
17664326	3.48469	2.63212	-1.32391	0.0124968	---	ENSRNOT00000077296
17636662	2.6991	2.04396	-1.32053	0.0350681	---	ENSRNOT00000089011
17876893	3.38108	2.56076	-1.32034	0.0419388	LOC685789	XM_006227313
17600585	3.73122	2.83256	-1.31726	0.0443452	---	---
17610099	3.73122	2.83256	-1.31726	0.0443452	---	---
17604027	4.67504	3.55143	-1.31638	0.00735535	---	---
17787479	2.32268	1.7667	-1.3147	0.0398514	LOC103692234	XM_008763347
17878660	2.57751	1.96127	-1.31421	0.01147	---	ENSRNOT00000088990
17843241	4.34045	3.3044	-1.31354	0.00989482	---	GENSCAN00000041658
17780948	4.4438	3.39129	-1.31036	0.0269679	---	---
17725233	4.3681	3.34792	-1.30472	0.00420186	---	GENSCAN00000034589
17692643	4.39255	3.36752	-1.30439	0.039215	Ephx4	NM_001105994
17668584	3.18582	2.4427	-1.30422	0.00927266	---	ENSRNOT00000088826
17870837	2.77059	2.12653	-1.30287	0.0108021	---	ENSRNOT00000078060
17607905	4.55351	3.49616	-1.30243	0.0287294	---	---
17802718	4.04047	3.1054	-1.30111	0.0452252	Trnp1	XM_001069068
17725423	4.35019	3.35295	-1.29742	0.0259346	LOC103694185	XM_008772053
17711255	2.74987	2.12008	-1.29706	0.042724	---	ENSRNOT00000090257
17839733	4.7133	3.64084	-1.29456	0.0480191	---	ENSRNOT00000078815
17866738	4.4606	3.44837	-1.29354	0.0305638	---	NONRATT058390
17792083	3.71313	2.88006	-1.28925	0.040481	---	GENSCAN00000052033
17688569	3.66277	2.85285	-1.2839	0.0355192	Gk2	NM_001004077
17602041	5.23201	4.07581	-1.28367	0.00018537	---	---
17656503	3.63444	2.83222	-1.28325	0.045327	RGD1559534	ENSRNOT00000002064
17607773	4.30134	3.35915	-1.28048	0.0371436	---	---
17777537	4.12596	3.22498	-1.27937	0.025027	---	ENSRNOT00000090455
17653930	4.69404	3.66924	-1.27929	0.0112503	LOC100361104	XM_002727701
17825050	3.71782	2.90921	-1.27795	0.0469888	---	ENSRNOT00000091268
17805450	5.17616	4.05774	-1.27563	0.00694209	RGD1561849	NM_001109260
17831908	3.26907	2.56316	-1.27541	0.0300709	---	ENSRNOT00000086801
17726649	4.09717	3.21302	-1.27518	0.0441786	Spink13	NM_001109539
17633915	5.17879	4.06398	-1.27431	0.00115593	---	---
17602021	4.07001	3.19565	-1.27361	0.00836068	---	---
17760321	3.51472	2.76477	-1.27125	0.0139309	Lcn4	XM_006224383
17844192	4.66737	3.67477	-1.27011	0.0228008	Slc35f2	NM_001106822
17711983	4.06993	3.20496	-1.26988	0.00428324	LOC100910977	XM_003751603
17796833	3.40855	2.69027	-1.26699	0.0174509	---	ENSRNOT00000087024
17818649	2.65855	2.10041	-1.26573	0.0416246	Mir411	NR_032275
17716278	3.85379	3.05527	-1.26136	0.00110577	---	GENSCAN00000057733
17879625	3.27127	2.59549	-1.26037	0.00723412	---	ENSRNOT00000063060
17703186	3.48248	2.76527	-1.25936	0.0393443	Gzmf	NM_153466
17874062	3.39776	2.69858	-1.25909	0.0329016	---	---
17694443	3.24266	2.57861	-1.25752	0.0201682	---	ENSRNOT00000078391
17863211	4.29342	3.42606	-1.25316	0.00333428	---	XM_008758000
17781280	4.50438	3.59604	-1.2526	0.0293875	LOC103692071	XM_008762749
17746564	3.51956	2.81431	-1.25059	0.0103253	---	---
17774397	3.91099	3.13091	-1.24915	0.00987689	Olr744	NM_001000577
17730306	4.10534	3.28775	-1.24868	0.0200626	---	ENSRNOT00000086376
17711322	4.57745	3.67299	-1.24625	0.0282875	Spock3	NM_001107310
17755592	4.9992	4.02749	-1.24127	0.00638454	Ak9	XM_003753496
17706458	3.72129	3.00987	-1.23637	0.0285656	Rbp3	NM_001191832
17621989	4.0375	3.26991	-1.23474	0.0197701	Olr302	NM_001000238
17603621	4.60799	3.73474	-1.23382	0.0227616	---	---
17635637	2.30817	1.87115	-1.23356	0.0287721	Olr129	NM_001001027
17723509	4.47366	3.62756	-1.23324	0.000584028	---	---
17778304	4.39691	3.56607	-1.23298	0.0426268	Nrsn2	NM_001109561
17812273	4.08916	3.31771	-1.23252	0.0466297	Pramef20	XM_001077012
17635588	4.94451	4.01679	-1.23096	0.000630226	Olr121	NM_001000155
17843069	5.4219	4.41029	-1.22937	0.032388	LOC100360143	XM_002729890
17606587	4.75016	3.86446	-1.22919	0.0132264	---	---
17658479	4.38498	3.56743	-1.22917	0.0349723	Olr1474	NM_001000943
17664233	4.16589	3.40081	-1.22497	0.000753972	---	GENSCAN00000019294
17788736	3.9915	3.26082	-1.22408	0.00555584	---	---
17874533	4.93987	4.04	-1.22274	0.0372207	---	---
17664442	3.54716	2.90298	-1.2219	0.00537241	---	ENSRNOT00000089032
17880340	3.97398	3.25536	-1.22075	0.0198279	---	GENSCAN00000049630
17617261	4.05355	3.32217	-1.22015	0.0211786	Mir211	NR_031924
17769299	4.60496	3.77588	-1.21957	0.0207031	Spo11	NM_001108964
17842225	3.58313	2.94326	-1.2174	0.0154548	---	ENSRNOT00000089268
17763691	4.73055	3.88806	-1.21669	0.0393148	Olr595	NM_001006596
17795006	3.1741	2.61489	-1.21386	0.00791522	Tuba3a	NM_001040008
17662073	4.13304	3.40535	-1.21369	0.042126	Spata32	NM_001005531
17881549	4.37016	3.60195	-1.21328	0.00916779	---	---
17880833	4.47545	3.69271	-1.21197	0.00599679	---	---
17798630	4.33936	3.58123	-1.21169	0.0103926	Foxe1	NM_138909
17671298	4.91402	4.05623	-1.21147	0.0254647	Pcp2	NM_001107116
17680226	5.00602	4.14178	-1.20866	0.00680922	Fmod	NM_080698
17813583	3.43518	2.85279	-1.20414	0.0124035	---	ENSRNOT00000088494
17713941	4.27468	3.55006	-1.20412	0.0235641	Ctsr	NM_175581
17766983	4.14201	3.44353	-1.20284	0.0461313	---	ENSRNOT00000084125
17707510	4.09401	3.40466	-1.20247	0.0351087	---	ENSRNOT00000054504
17709048	4.56795	3.80259	-1.20127	0.036145	Defb12	NM_001037514
17830322	3.81036	3.17498	-1.20012	0.0127313	---	ENSRNOT00000088464
17830364	3.09957	2.58461	-1.19924	0.038246	---	ENSRNOT00000078365
17665832	4.54608	3.79247	-1.19871	0.0284878	---	---
17876479	4.42543	3.69536	-1.19757	0.0177072	Ott	XM_006257440
17877407	3.43183	2.86724	-1.19691	0.0123068	---	GENSCAN00000055465
17722664	3.24627	2.71421	-1.19603	0.0326485	Pcdhb11	XM_001055576
17676608	2.76521	2.31368	-1.19516	0.028099	Vom2r61	NM_001099508
17703220	4.65984	3.89953	-1.19498	0.0109909	---	---
17694311	5.15815	4.31763	-1.19467	0.0222885	Grxcr1	NM_001191935
17653468	4.25941	3.56538	-1.19466	0.00704921	Pla2g10	NM_017176
17633381	4.59402	3.85207	-1.19261	0.0478331	---	ENSRNOT00000088934
17881048	4.42613	3.71639	-1.19098	0.00728854	RGD1566387	XM_006227517
17715140	4.36467	3.66491	-1.19094	0.0204026	---	ENSRNOT00000079635
17785915	4.45141	3.74413	-1.1889	0.0203699	Cav3	NM_019155
17814005	3.11323	2.62318	-1.18682	0.041	---	ENSRNOT00000072498
17881173	4.72165	3.97921	-1.18658	0.0307543	---	RPTR-A12338-1
17668365	3.97008	3.35053	-1.18491	0.046915	---	GENSCAN00000038824
17775285	3.88215	3.27676	-1.18475	0.0403479	Olr747	NM_001001068
17699518	4.64996	3.92543	-1.18457	0.0318803	Defb43	NM_001037528
17881171	4.10257	3.46532	-1.18389	0.0339351	---	RPTR-A06498-1
17783891	4.82013	4.07201	-1.18372	0.0356518	Vom1r72	NM_001009521
17814793	3.50716	2.96438	-1.1831	0.0360321	---	ENSRNOT00000080164
17810057	4.28386	3.62609	-1.1814	0.0215852	Olr866	NM_001000411
17854660	4.06307	3.43983	-1.18118	0.00731541	---	GENSCAN00000014350
17737222	4.9437	4.18541	-1.18118	0.0167476	Pmp2	NM_001109514
17844705	4.57332	3.87451	-1.18036	0.0412119	Celf6	NM_001106827
17720059	3.48116	2.95122	-1.17956	0.0176441	---	ENSRNOT00000069761
17846131	3.73437	3.16591	-1.17956	0.0316077	Gsta5	NM_001010921
17715886	4.96154	4.20753	-1.17921	0.045508	Gpx5	NM_001105738
17790019	4.92697	4.17923	-1.17892	0.0149384	---	---
17820928	5.11107	4.33573	-1.17883	0.0481363	Efr3b	XM_006225717
17819544	4.83644	4.10335	-1.17866	0.040528	Tmem196	NM_001044269
17842288	3.52833	2.99378	-1.17855	0.029301	---	ENSRNOT00000080906
17607037	4.77922	4.05925	-1.17736	0.0249813	---	---
17822614	4.91125	4.17209	-1.17717	0.0463938	Six1	NM_053759
17792028	4.37008	3.71676	-1.17578	0.0303392	---	GENSCAN00000018492
17602687	4.5459	3.87047	-1.17451	0.0405673	---	---
17756731	3.95844	3.37107	-1.17424	0.0317448	Btnl3	NM_001002803
17774219	4.17277	3.55487	-1.17382	0.0324754	---	GENSCAN00000007863
17718640	3.72853	3.17955	-1.17266	0.0237502	Mir3596d	NR_037338
17626408	4.7722	4.08057	-1.16949	0.00726639	---	ENSRNOT00000063723
17690113	4.04769	3.46126	-1.16943	0.0316584	---	GENSCAN00000046386
17617131	4.41946	3.77996	-1.16918	0.0216126	Gabrb3	NM_017065
17680673	5.33007	4.55979	-1.16893	0.0424597	---	GENSCAN00000028121
17824346	4.32474	3.70051	-1.16869	0.04674	Mir3592	NR_037393
17874722	4.54002	3.8851	-1.16857	0.00789351	F9	NM_031540
17664495	4.39076	3.75816	-1.16833	0.0485365	---	GENSCAN00000019990
17842247	3.26836	2.79758	-1.16828	0.0016934	Olr1162	NM_001000870
17883033	4.04845	3.46797	-1.16738	0.0355585	---	---
17837275	4.49546	3.85155	-1.16718	0.0225769	---	---
17747119	4.16487	3.57248	-1.16582	0.0115513	---	GENSCAN00000025704
17844933	4.45157	3.81868	-1.16574	0.042734	---	ENSRNOT00000083313
17635717	4.23046	3.62914	-1.16569	0.043877	Olr174	NM_001001028
17625943	5.12906	4.40028	-1.16562	0.0102843	Sema4g	NM_001108526
17726740	3.77497	3.24111	-1.16472	0.00841001	---	---
17878506	4.05616	3.48303	-1.16455	0.0151554	RGD1561552	NM_001126271
17880501	4.70484	4.05068	-1.16149	0.040674	RGD1564915	XM_001053975
17737452	5.39274	4.64536	-1.16089	0.0272215	---	---
17681000	4.07362	3.50958	-1.16071	0.0440966	Shcbp1l	NM_001105961
17787545	4.75049	4.09281	-1.16069	0.0406433	Klrb1	NM_001085405
17826858	3.98014	3.43408	-1.15901	0.0381839	---	---
17883772	4.02319	3.47247	-1.15859	0.0428815	---	---
17872707	4.4724	3.86174	-1.15813	0.0295376	LOC100363193	NM_001177824
17621587	3.94499	3.40687	-1.15795	0.0471945	LOC103690408	XM_008774712
17675050	4.61371	3.9847	-1.15786	0.00258121	Map2k7	XM_001067872
17754602	4.47577	3.8667	-1.15752	0.0380028	Rtdr1	NM_001127557
17883207	6.39885	5.53169	-1.15676	0.00794615	---	ENSRNOT00000051008
17774045	4.35064	3.76107	-1.15675	0.0136693	---	GENSCAN00000033998
17604931	6.03089	5.21463	-1.15653	0.00957137	---	---
17753995	4.74376	4.10273	-1.15625	0.0086759	Pde9a	NM_138543
17883742	4.90481	4.24328	-1.1559	0.0480244	---	---
17787922	4.54608	3.93369	-1.15568	0.011047	---	---
17605339	5.334	4.61869	-1.15488	0.00992277	---	---
17880744	5.46237	4.73063	-1.15468	0.0169487	Rnf223	XM_003750095
17863238	4.48289	3.88863	-1.15282	0.009896	---	ENSRNOT00000078679
17688108	4.21494	3.66237	-1.15088	0.0187309	---	ENSRNOT00000047322
17872580	4.19799	3.65053	-1.14997	0.0051071	LOC100909677	XM_003752046
17797315	5.14726	4.47827	-1.14939	0.0167709	Cdh17	NM_053977
17774270	5.13632	4.46962	-1.14916	0.0274096	Olr650	NM_001000639
17649863	4.71741	4.1054	-1.14907	0.00976112	Tbx4	NM_001107034
17664918	3.77904	3.28932	-1.14888	0.028977	---	---
17719761	4.64674	4.04733	-1.1481	0.0422845	---	GENSCAN00000007382
17646209	4.03198	3.51196	-1.14807	0.0283321	---	GENSCAN00000031738
17607935	5.01956	4.37283	-1.1479	0.0370097	---	---
17630489	4.935	4.29984	-1.14772	0.0205479	Tex101	XM_006228381
17808901	4.31168	3.75963	-1.14684	0.0490312	RGD1561212	XM_006225404
17711987	4.77	4.16271	-1.14589	0.0116725	Adam24	XM_008771287
17876865	3.88905	3.39577	-1.14526	0.0182382	LOC685699	XM_006227310
17676538	4.61036	4.02719	-1.14481	0.0215233	Mir25	NR_031829
17613521	4.76753	4.16479	-1.14472	0.0357314	Cabp5	NM_001108907
17679443	4.37649	3.82874	-1.14306	0.0135818	Serpinb13	NM_001107168
17711787	4.71316	4.12852	-1.14161	0.000789242	Pdlim3	NM_053650
17866780	4.94147	4.32978	-1.14128	0.0344295	---	ENSRNOT00000034533
17604627	5.79807	5.08057	-1.14123	0.0489355	---	---
17783444	4.03089	3.53324	-1.14085	0.00536981	Aoc1	NM_022935
17702226	4.0073	3.51315	-1.14066	0.0399922	Olr1645	NM_001000102
17860307	5.06069	4.43839	-1.14021	0.0262082	LOC102548134	XR_349134
17791875	6.59463	5.78482	-1.13999	0.0459029	---	ENSRNOT00000072325
17743062	5.41436	4.7498	-1.13991	0.0117583	Adh4	ENSRNOT00000090253
17730701	4.99522	4.38521	-1.13911	0.0329387	Mir3564	NR_037347
17843250	3.68757	3.23847	-1.13868	0.0380741	Olr1214	NM_001000438
17848329	4.9053	4.30792	-1.13867	0.0461731	Lrrc2	NM_001012001
17746398	4.85666	4.26666	-1.13828	0.017765	---	GENSCAN00000042108
17774182	5.21355	4.5808	-1.13813	0.0136885	Olr533	NM_001000673
17741928	4.30383	3.78206	-1.13796	0.0454125	---	ENSRNOT00000089090
17785391	4.25016	3.73954	-1.13655	0.0110245	Vom1r97	NM_173297
17797288	5.28691	4.65243	-1.13638	0.0195075	Gem	NM_001106637
17619110	4.75105	4.18137	-1.13624	0.0458165	Olr110	NM_001000743
17629992	4.82579	4.24947	-1.13562	0.0068605	Crx	NM_021855
17796847	4.09728	3.60926	-1.13521	0.03599	LOC680435	XR_145970
17624812	4.47034	3.93835	-1.13508	0.0271948	Slc1a1	NM_013032
17723051	4.27685	3.76978	-1.13451	0.0120255	Lvrn	XM_001054995
17841243	4.8651	4.28864	-1.13442	0.0289097	---	---
17611240	3.9819	3.51604	-1.1325	0.00813792	---	---
17731839	4.44416	3.92587	-1.13202	0.0409313	Sez6l	NM_001134538
17729870	4.74805	4.20111	-1.13019	0.0122224	Mir140	NR_031779
17868867	4.40981	3.90236	-1.13004	0.00653087	LOC291863	NM_001013889
17717823	4.20027	3.71805	-1.1297	0.0332577	Mir24-1	NR_031827
17707766	5.18721	4.59199	-1.12962	0.015305	---	---
17741466	4.30916	3.81749	-1.12879	0.00545808	Ampd1	NM_138876
17865545	4.65372	4.12476	-1.12824	0.016879	Mir375	NR_032271
17827234	4.96231	4.40131	-1.12746	0.0477871	Aldh1l2	NM_001191778
17883270	5.45298	4.83851	-1.127	0.0226465	---	---
17850788	5.0505	4.48217	-1.1268	0.0395955	Tmem45b	NM_001033067
17674285	4.45239	3.95451	-1.1259	0.0211036	---	---
17865827	5.06904	4.50255	-1.12581	0.00191237	Scg2	NM_022669
17728627	3.87075	3.44219	-1.1245	0.0469747	Best2	NM_001108895
17880310	5.70338	5.07631	-1.12353	0.0454781	RGD1562394	XM_001081708
17707849	4.90279	4.37324	-1.12109	0.0343557	---	GENSCAN00000022549
17641494	5.15149	4.60023	-1.11983	0.0316403	Tpd52l3	NM_001106349
17818137	5.92583	5.29353	-1.11945	0.0431608	LOC299282	NM_182474
17880959	4.80697	4.29715	-1.11864	0.00827085	LOC103690545	XM_008758039
17823389	4.71083	4.21389	-1.11793	0.0468653	---	ENSRNOT00000069549
17609949	5.11196	4.57328	-1.11779	0.0484836	---	---
17607811	4.18738	3.74965	-1.11674	0.0470404	---	---
17607863	4.18738	3.74965	-1.11674	0.0470404	---	---
17629006	5.35702	4.79809	-1.11649	0.048956	Vom1r10	NM_001008958
17749142	5.15318	4.61635	-1.11629	0.00606193	---	GENSCAN00000033305
17779178	4.31796	3.86834	-1.11623	0.0363121	Slpil2	NM_001008872
17658637	5.18	4.64316	-1.11562	0.0445366	Serpinf2	NM_001011892
17810045	5.56896	4.992	-1.11558	0.00529453	Olr857	NM_001000583
17747131	5.09323	4.56678	-1.11528	0.00957396	RGD1563562	XM_008760965
17880903	5.4915	4.9257	-1.11487	0.0244199	---	---
17882659	5.08043	4.55766	-1.1147	0.0461189	---	NM_022852
17665258	5.50073	4.94357	-1.1127	0.019671	Lnp1	XM_006221099
17819449	5.01581	4.50849	-1.11252	0.0187319	Ptprn2	NM_031600
17768369	5.34422	4.80931	-1.11122	0.0344452	---	ENSRNOT00000091559
17611384	6.6974	6.03016	-1.11065	0.0180965	Slc6a18	NM_017163
17690395	5.19815	4.68044	-1.11061	0.0222566	RGD1565560	XM_001060544
17612471	4.2311	3.81008	-1.1105	0.0183578	Vom1r21	NM_001009510
17881154	4.91561	4.42659	-1.11047	0.0394253	---	---
17670915	4.85143	4.37403	-1.10914	0.0145232	LOC102546862	XM_008758295
17751329	5.91867	5.34071	-1.10822	0.00965729	Egf	NM_012842
17716950	5.10463	4.60954	-1.1074	0.025102	---	ENSRNOT00000085036
17600677	4.95032	4.47293	-1.10673	0.00146592	---	---
17610191	4.95032	4.47293	-1.10673	0.00146592	---	---
17821649	4.66646	4.21678	-1.10664	0.0340081	---	GENSCAN00000003897
17838174	4.65317	4.20786	-1.10583	0.0201713	LOC680316	XM_008765639
17740626	4.11004	3.7179	-1.10547	0.0198133	C2cd4d	XM_006224209
17807247	5.91662	5.35243	-1.10541	0.0431208	Grin3a	ENSRNOT00000007957
17795787	4.66919	4.224	-1.1054	0.0437596	Tas2r129	NM_001166683
17635920	4.72568	4.27649	-1.10504	0.0493927	Olr218	NM_001000551
17856301	5.03868	4.56224	-1.10443	0.0339886	---	GENSCAN00000049689
17606669	5.86445	5.3122	-1.10396	0.02904	---	---
17883274	5.49033	4.97439	-1.10372	0.0426125	---	---
17874991	5.30581	4.80792	-1.10356	0.00279606	LOC690082	XM_006227237
17768777	4.83252	4.37924	-1.10351	0.00219554	Svs4	NM_012662
17742987	5.50902	4.99569	-1.10276	0.0446209	LOC102555814	XM_006224273
17664878	5.93016	5.38205	-1.10184	0.0473061	---	GENSCAN00000006571
17724615	4.84265	4.39776	-1.10116	0.0229539	Fbxo15	NM_001108436
17605559	5.21642	4.73837	-1.10089	0.0424956	---	---
17825898	3.58838	3.26476	-1.09913	0.0333023	---	---
17797445	5.04572	4.59478	-1.09814	0.0164928	Cngb3	NM_001271238
17789901	6.24828	5.69077	-1.09797	0.00190581	---	GENSCAN00000004108
17770733	5.14181	4.68752	-1.09691	0.0142069	Vegp2	NM_053574
17795882	4.32694	3.94724	-1.09619	0.0479874	Gsg1	NM_001013166
17749641	5.50171	5.02174	-1.09558	0.0261859	Nudt17	NM_001109340
17682154	5.2778	4.81988	-1.09501	0.0168592	Cfap45	NM_001024882
17691728	4.58837	4.19797	-1.093	0.0418948	---	GENSCAN00000058185
17838768	4.77343	4.37218	-1.09177	0.0351489	Foxh1	NM_001130493
17861121	4.90435	4.49237	-1.09171	0.0347989	Alppl2	XM_008758072
17824528	5.46651	5.01198	-1.09069	0.0193935	Ahnak2	XM_008776340
17601825	5.61335	5.15135	-1.08968	0.0379131	---	---
17673401	5.02725	4.61543	-1.08922	0.0173166	Zfp11	XM_006221341
17781466	4.76399	4.37895	-1.08793	0.023767	---	GENSCAN00000003524
17731951	5.16828	4.75577	-1.08674	0.0369194	---	---
17838798	5.1175	4.70963	-1.0866	0.0299166	Lrrc24	NM_001135896
17742537	6.71463	6.18202	-1.08615	0.0357943	Arsj	NM_001047887
17612863	6.71462	6.18306	-1.08597	0.039027	Zfp418	NM_001191620
17742419	5.45833	5.02782	-1.08563	0.0438635	Bcar3	NM_001107722
17866307	4.31577	3.98064	-1.08419	0.0234362	Dnajb3	NM_001109396
17771322	5.3048	4.89647	-1.08339	0.041388	Ttc16	XM_003749453
17798803	5.13546	4.74602	-1.08206	0.0185512	Murc	NM_001107931
17822984	4.82991	4.46489	-1.08175	0.0285933	Slc10a1	NM_017047
17679728	6.63198	6.13303	-1.08135	0.0281141	---	ENSRNOT00000054487
17765785	5.7832	5.3541	-1.08015	0.0212632	Slc27a2	NM_031736
17770011	6.10854	5.65609	-1.07999	0.0486513	---	ENSRNOT00000054562
17654033	5.38657	4.98839	-1.07982	0.00614027	Olr1356	NM_001000493
17657485	5.10252	4.72733	-1.07937	0.0467993	---	ENSRNOT00000075523
17883690	4.45835	4.13089	-1.07927	3.04743e-05	---	---
17612797	5.15345	4.78064	-1.07798	0.04543	LOC100359972	XM_002725506
17823470	5.10425	4.73611	-1.07773	0.0354698	Gle1-ps1	XR_593191
17677021	5.15919	4.78804	-1.07752	0.0417383	Trim50	NM_181080
17757392	5.75283	5.34635	-1.07603	0.011757	---	ENSRNOT00000085192
17642329	6.80401	6.3254	-1.07567	0.0429184	Scd1	NM_139192
17660257	4.89489	4.55109	-1.07554	0.0440094	Tmem92	XM_008768249
17845789	5.40692	5.03511	-1.07384	0.0116469	Dyx1c1	NM_001007010
17837872	6.10189	5.68623	-1.0731	0.0470784	Col22a1	XM_001072793
17779556	5.10671	4.76318	-1.07212	0.0375938	Kcnb1	NM_013186
17767178	8.62374	8.04809	-1.07153	0.0366307	---	---
17774816	5.32768	4.97402	-1.0711	0.00355509	LOC103695174	XR_600271
17764304	5.19046	4.8509	-1.07	0.0433437	Slc1a2	AY069978
17757895	6.14322	5.75245	-1.06793	0.0403071	Gstt3	NM_001137643
17882497	4.81378	4.51343	-1.06655	0.0233959	---	XM_001058984
17867322	6.79901	6.38177	-1.06538	0.0454961	---	---
17860813	4.92744	4.62601	-1.06516	0.0345607	Nyap2	XR_589287
17832113	6.04231	5.67456	-1.06481	0.0209465	Wnt1	NM_001105714
17852119	6.4491	6.05923	-1.06434	0.0261235	LOC102551354	XM_006226456
17792224	5.96362	5.6214	-1.06088	0.0471079	---	NONRATT041504
17854449	4.91868	4.64478	-1.05897	0.0497307	Snap91	NM_031728
17719375	6.31991	5.97115	-1.05841	0.0112373	RGD1307443	NM_001197023
17806664	4.67723	4.42166	-1.0578	0.0362271	Ccl21	NM_001008513
17875055	6.48966	6.14563	-1.05598	0.0384961	Dusp9	NM_001037973
17790970	5.69691	5.40058	-1.05487	0.0442454	Try10	NM_001004097
17818295	5.73151	5.43913	-1.05375	0.0360236	Cyp46a1	NM_001108723
17627742	7.21546	6.8482	-1.05363	0.0166178	Taar7e	NM_175590
17600659	5.80288	5.53737	-1.04795	0.0438281	---	---
17610173	5.80288	5.53737	-1.04795	0.0438281	---	---
17801679	5.59045	5.34027	-1.04685	0.00453866	Guca2a	NM_013118
17633011	7.43768	7.12618	-1.04371	0.0435259	Syngr4	NM_001025644
17628459	5.71119	5.47539	-1.04307	0.0453776	Mrgprh	NM_001002281
17739044	7.20346	7.00269	-1.02867	0.0290381	Mlf1	NM_001107680
17714900	8.23912	8.37489	1.01648	0.0158819	---	---
17612808	10.0713	10.247	1.01744	0.0429103	Vstm1	XM_002725507
17806222	10.6234	10.8128	1.01783	0.0374267	Manea	NM_080785
17864547	10.6199	10.8147	1.01834	0.0388528	LOC681338	ENSRNOT00000047517
17661796	11.3473	11.6051	1.02272	0.00423002	Lsm12	NM_001105843
17661471	11.0869	11.3478	1.02353	0.0225468	Rab5c	NM_001105840
17698522	6.55616	6.715	1.02423	0.0461793	---	ENSRNOT00000070991
17691617	10.474	10.728	1.02425	0.0414805	Ikzf1	NM_001107237
17832982	10.8762	11.1532	1.02547	0.0433463	Pa2g4	NM_001004206
17644950	10.9696	11.2516	1.02571	0.0424734	Lcp2	NM_130421
17630680	10.0532	10.3218	1.02671	0.0139666	Ceacam1	NM_001033860
17787097	9.81592	10.0882	1.02773	0.0485038	---	---
17717308	10.9794	11.2909	1.02838	0.0316943	Plxdc2	NM_001108422
17708153	9.569	9.84342	1.02868	0.0167886	---	---
17856125	10.5204	10.8252	1.02897	0.0236946	Pdcd6ip	NM_001029910
17602545	7.53134	7.75061	1.02911	0.0463175	---	---
17714849	9.70621	9.99373	1.02962	0.0199838	Phf2	NM_001107342
17688889	10.0095	10.3157	1.03059	0.0358659	---	---
17636289	11.5702	11.9251	1.03068	0.014318	---	---
17817782	9.31463	9.6031	1.03097	0.0217039	Gpr65	NM_001106751
17787115	11.5131	11.8718	1.03116	0.0279984	---	ENSRNOT00000084518
17787116	11.5131	11.8718	1.03116	0.0279984	---	---
17811169	10.2693	10.5902	1.03125	0.0216609	Wasf2	NM_001013167
17653953	6.43732	6.63912	1.03135	0.0412769	Hmox2	NM_001277073
17866937	9.84349	10.1542	1.03157	0.0146952	Rab31	NM_145094
17670575	8.27367	8.53831	1.03199	0.00701124	B3gnt5	NM_053932
17787100	9.96824	10.2888	1.03216	0.03117	---	---
17797581	8.11501	8.37919	1.03255	0.0307758	Fbxl4	NM_001107919
17635403	9.37072	9.69074	1.03415	0.0240058	Folr2	NM_001106283
17865053	9.52868	9.86687	1.03549	0.0127224	Klf7	NM_001108800
17623683	11.2483	11.6481	1.03554	0.0452157	LOC100912041	XR_590584
17813875	9.45516	9.79202	1.03563	0.0493746	Cript	NM_019907
17883195	10.7699	11.1591	1.03614	0.0299935	---	ENSRNOT00000045072
17648530	11.2494	11.6571	1.03624	0.0061695	---	---
17867282	10.7451	11.1371	1.03648	0.0388004	---	ENSRNOT00000045072
17818951	9.65513	10.008	1.03655	0.0490742	Eif5	NM_020075
17660784	8.4174	8.72628	1.0367	0.044146	Mien1	NM_001108296
17851673	7.67056	7.9541	1.03697	0.0346255	Pdzd3	NM_001191996
17842144	7.59265	7.87526	1.03722	0.0387286	---	ENSRNOT00000083265
17665624	7.39745	7.67373	1.03735	0.0321522	LOC685767	XM_008768748
17719453	8.24303	8.55105	1.03737	0.0215991	Cmah	NM_001024273
17757565	7.14753	7.41539	1.03748	0.0269446	LOC100365646	XM_006256266
17856974	8.72664	9.0546	1.03758	0.00877356	Satb1	NM_001012129
17744731	8.45463	8.77486	1.03788	0.0489334	Bdp1	ENSRNOT00000024023
17747418	8.40231	8.72077	1.0379	0.0397888	Ccna1	NM_001011949
17839278	5.4283	5.63423	1.03794	0.0260014	Rps19bp1	NM_001130578
17690272	7.66064	7.95358	1.03824	0.0413451	Lcorl	XM_001058603
17600875	7.95619	8.26432	1.03873	0.0116948	---	---
17692517	8.08298	8.39947	1.03916	0.0359852	Ccdc18	XM_006221639
17635675	9.5985	9.97453	1.03918	0.0273683	Trim5	NM_001014023
17772320	9.62049	10.0004	1.03949	0.0424468	Stam2	NM_001012085
17665981	7.23781	7.52384	1.03952	0.000398657	Slc15a2	NM_031672
17840277	8.97516	9.33323	1.0399	0.047833	Gxylt1	NM_001100887
17837767	9.8209	10.2129	1.03991	0.045827	Tmem71	NM_001271215
17607045	7.2332	7.52221	1.03996	0.0427372	---	---
17750657	9.45879	9.83777	1.04007	0.0424761	Stxbp3	NM_053637
17636301	10.2049	10.6191	1.04059	0.00901023	---	NONRATT006201
17636302	10.2049	10.6191	1.04059	0.00901023	---	---
17774266	5.04146	5.24666	1.0407	0.0453554	Olr631	NM_001000339
17643104	5.25744	5.47152	1.04072	0.018582	---	---
17603443	5.91905	6.16013	1.04073	0.0484925	---	---
17629913	7.54525	7.85282	1.04076	0.00248564	RGD1310257	XM_006223077
17780879	10.0403	10.4505	1.04086	0.0204357	Ptpn12	NM_057115
17727296	8.17309	8.50952	1.04116	0.0488156	Nfatc1	NM_001244933
17686504	5.09754	5.31289	1.04224	0.0433139	---	ENSRNOT00000086838
17871605	8.94653	9.32449	1.04225	0.0151585	LOC683430	XM_001065910
17880160	9.24243	9.63326	1.04229	0.0273159	Slfn1	XM_001068751
17843141	5.91189	6.16313	1.0425	0.0225127	Tmem218	NM_001008325
17690963	7.99079	8.33477	1.04305	0.0206347	---	---
17821531	9.0849	9.48352	1.04388	0.0445247	Pik3cg	XM_003750140
17779331	7.69788	8.03567	1.04388	0.0416649	Ncoa5	NM_001106543
17859655	8.22521	8.58653	1.04393	0.0176698	Bmpr2	NM_080407
17600835	7.39639	7.72367	1.04425	0.03768	---	---
17789488	8.804	9.19424	1.04433	0.0368474	Samd9l	XM_006236084
17804598	10.9904	11.481	1.04464	0.0258207	Rpl22	BC058466
17835724	10.3729	10.8365	1.04469	0.0383949	Glipr1	NM_001011987
17662959	5.32759	5.56687	1.04491	0.0129824	---	---
17880477	7.56521	7.90615	1.04507	0.0423373	---	ENSRNOT00000091620
17818007	6.13277	6.40927	1.04509	0.0399404	Tmem251	XM_002729747
17702182	8.19619	8.56578	1.04509	0.0131568	---	ENSRNOT00000078665
17881889	5.57871	5.83322	1.04562	0.0203194	---	XM_006220923
17800587	6.05923	6.33594	1.04567	0.0482612	Hspb11	NM_001131002
17711277	8.58327	8.97584	1.04574	0.0344978	March1	NM_001135838
17631443	5.79789	6.06318	1.04576	0.038096	Zfp27	XM_008759225
17795534	9.88997	10.343	1.04581	0.0236251	LOC103690111	XM_006225086
17744073	8.92687	9.33617	1.04585	0.0456686	Vcan	NM_001170558
17768821	7.43218	7.77318	1.04588	0.0345177	---	---
17847555	7.21113	7.54255	1.04596	0.0407639	Camkv	NM_024000
17822868	7.70346	8.0582	1.04605	0.00404568	---	---
17624245	7.83214	8.19458	1.04628	0.0160855	---	ENSRNOT00000089688
17751564	7.94714	8.31666	1.0465	0.0362568	Bank1	NM_001047918
17704825	6.00743	6.28776	1.04666	0.0474061	Pcdh20	NM_001107280
17754713	6.95309	7.27937	1.04693	0.0244264	RGD1306739	NM_001134576
17779424	6.18348	6.4755	1.04723	0.0318434	LOC685619	XM_002729250
17791585	5.70072	5.96998	1.04723	0.0384261	Lsm5	NM_001107289
17678891	8.56916	8.97726	1.04762	0.033635	---	---
17776979	6.18011	6.47519	1.04775	0.00959254	Fahd2a	NM_001134834
17632219	6.65278	6.97231	1.04803	0.0158277	LOC102555051	XM_006223225
17651653	9.1607	9.60367	1.04836	0.038894	Fmnl1	NM_001105846
17660362	6.29696	6.60422	1.04879	0.0334509	Ngfr	NM_012610
17801019	6.26863	6.57484	1.04885	0.0180796	LOC100911772	XM_006225515
17882291	7.71478	8.09589	1.0494	0.042176	---	XM_002724899
17727792	7.41321	7.77994	1.04947	0.0363784	---	ENSRNOT00000081852
17801997	8.12493	8.52739	1.04953	0.0294536	Rspo1	NM_001107980
17603633	5.89182	6.18491	1.04975	0.0279757	---	---
17819983	6.54477	6.87223	1.05003	0.0332291	Prepl	NM_001010951
17882331	8.09468	8.50069	1.05016	0.0450462	---	NM_001271475
17881785	5.55075	5.83001	1.05031	0.013875	---	NR_037315
17635894	7.75794	8.14916	1.05043	0.0277208	LOC499229	XM_001075550
17794572	5.63629	5.9216	1.05062	0.0486641	Klrg1	NM_031649
17615696	6.44818	6.77492	1.05067	0.0130681	Zfp141	XM_006223226
17605895	6.82094	7.17064	1.05127	0.0250852	---	---
17650607	5.86994	6.17088	1.05127	0.0472831	Osbpl7	NM_001107044
17826267	8.47369	8.91182	1.0517	0.0395287	---	---
17620391	9.2117	9.69014	1.05194	0.0365552	Prkcb	NM_001172305
17826274	9.94829	10.4659	1.05203	0.0153174	---	---
17700435	8.47917	8.92143	1.05216	0.0178082	Pibf1	NM_001305419
17754248	6.36604	6.69886	1.05228	0.0482577	LOC690431	XM_006223844
17873463	7.76699	8.17479	1.0525	0.0431268	Atp7a	NM_052803
17657791	10.5373	11.1006	1.05345	0.0122681	---	ENSRNOT00000083744
17864386	6.60919	6.96406	1.05369	0.000533482	Stat4	NM_001012226
17710221	8.01146	8.44365	1.05395	0.0482743	Wdfy4	XM_006222110
17743103	9.12323	9.61593	1.05401	0.0486685	Tspan5	NM_001004090
17770406	7.21368	7.60436	1.05416	0.0342748	Tmem141	NM_001109197
17711572	6.35976	6.70508	1.0543	0.0157043	LOC365085	XM_008758106
17779161	5.48764	5.78758	1.05466	0.00962329	Wfdc15b	NM_001009179
17747897	9.65127	10.1818	1.05497	0.0151693	---	ENSRNOT00000082298
17882025	9.80199	10.3418	1.05507	0.0216745	---	NM_001101009
17655700	6.03678	6.37144	1.05544	0.0112529	Itk	NM_001108825
17882499	7.11723	7.51227	1.0555	0.048268	---	XM_001072867
17705426	7.83424	8.26988	1.05561	0.0201911	Gpr18	NM_001079710
17635207	6.18546	6.53	1.0557	0.0124059	Neu3	NM_054010
17608779	8.44909	8.92008	1.05574	0.0374855	---	---
17804954	6.26963	6.62022	1.05592	0.0484652	Cdk11b	NM_145766
17689334	7.16828	7.57025	1.05608	0.0484246	Aasdh	XM_006250858
17688437	5.71841	6.03924	1.05611	0.0438275	---	ENSRNOT00000069193
17774291	5.80635	6.13302	1.05626	0.0420607	Olr663	NM_001000346
17852677	5.36337	5.66539	1.05631	0.0168271	Cib2	NM_001015010
17786158	8.50554	8.98787	1.05671	0.0192986	Brk1	NM_001195476
17853768	5.19536	5.4909	1.05689	0.0216586	Foxb1	NM_001013248
17875719	7.05945	7.46134	1.05693	0.0367066	Usp11	NM_001008861
17865793	4.82369	5.09919	1.05711	0.033508	---	ENSRNOT00000085842
17730363	5.92853	6.2704	1.05767	0.0162443	Nudt7	NM_001305426
17787099	8.70963	9.21193	1.05767	0.00201058	---	---
17851954	6.05925	6.40876	1.05768	0.0441576	Cd3g	NM_001077646
17605615	6.47945	6.85404	1.05781	0.0364363	---	---
17790063	7.587	8.02599	1.05786	0.0293189	Wasl	NM_001110365
17723299	6.79404	7.1874	1.0579	0.0481272	---	GENSCAN00000025913
17881093	5.55981	5.88188	1.05793	0.0346708	Eid2b	XR_590109
17668572	5.45175	5.76835	1.05807	0.00953687	---	ENSRNOT00000084952
17649537	10.0714	10.6573	1.05817	0.0254534	Slfn4	NM_053687
17609343	6.90071	7.30258	1.05824	0.0258564	---	---
17625518	8.89185	9.40988	1.05826	0.0144148	Entpd1	NM_022587
17600359	5.43594	5.75313	1.05835	0.0170698	---	---
17731351	6.48207	6.86118	1.05849	0.006325	Bean1	XM_006222658
17609729	5.08891	5.38687	1.05855	0.0466938	---	---
17636814	8.83125	9.3507	1.05882	0.0332403	Igsf6	NM_133542
17750150	5.68014	6.01453	1.05887	0.0454511	Fam19a3	XM_006224234
17642210	8.36471	8.86061	1.05929	0.0107093	Entpd7	NM_001107595
17764326	6.51281	6.89972	1.05941	0.0263256	---	---
17659395	10.2951	10.9068	1.05942	0.014803	Ccl6	NM_001004202
17644901	8.63348	9.14885	1.05969	0.0496506	Stk10	NM_019206
17605847	7.74551	8.21152	1.06016	0.0355306	---	---
17772978	7.26256	7.69987	1.06021	0.0209278	Stk39	NM_019362
17827164	6.02615	6.38963	1.06032	0.0263063	Cry1	NM_198750
17723832	7.89516	8.37526	1.06081	0.0176294	Malt1	XM_001060526
17873537	6.66058	7.06605	1.06087	0.0444328	RGD1560455	NM_001106939
17761572	5.91087	6.27211	1.06111	0.00599168	Angptl2	NM_133569
17610691	7.83822	8.31781	1.06119	0.0381575	Map3k5	NM_001277694
17676754	5.68085	6.0286	1.06121	0.0423349	Irs3	NM_032074
17628420	8.42165	8.93746	1.06125	0.0361077	Tagap	NM_001309449
17609991	5.21416	5.53396	1.06133	0.0139652	---	---
17781829	6.8736	7.29601	1.06145	0.00249533	---	---
17619464	8.08033	8.57843	1.06164	0.0146188	---	ENSRNOT00000088044
17831906	8.08033	8.57843	1.06164	0.0146188	---	ENSRNOT00000091986
17810614	6.46569	6.86453	1.06169	0.0303076	Ago4	NM_001106686
17777693	6.13554	6.51413	1.0617	0.0379826	Tasp1	NM_001044243
17661091	4.58523	4.87001	1.06211	0.029521	Krtap4-3	ENSRNOT00000066758
17786908	5.22483	5.54967	1.06217	0.0301891	---	GENSCAN00000010846
17702184	6.40677	6.80589	1.0623	0.0298177	Rab2b	NM_001037645
17615745	8.99485	9.55904	1.06272	0.0494685	Siglec5	NM_001106249
17692413	7.42028	7.89081	1.06341	0.0432488	Fgfrl1	NM_199114
17715845	6.27131	6.67099	1.06373	0.0369031	Zfp192	NM_001100574
17629677	9.04222	9.62008	1.06391	0.0272413	Lilrb4	NM_001013894
17605845	7.65028	8.14097	1.06414	0.0348257	---	---
17710984	6.76239	7.19634	1.06417	0.0240176	Sugp2	NM_001108397
17600235	7.6739	8.16652	1.06419	0.0412754	---	---
17634604	7.80481	8.30674	1.06431	0.0262264	Il16	NM_001105749
17635885	7.15717	7.61922	1.06456	0.0109245	Gvinp1	XM_008759822
17744200	6.80853	7.24832	1.06459	0.0432684	Zfyve16	NM_001191958
17676296	6.2605	6.66569	1.06472	0.0436959	Elfn1	NM_001105913
17846210	5.93922	6.32368	1.06473	0.035496	Myo6	XM_001061392
17882349	5.37177	5.71972	1.06477	0.0400059	---	XM_006222933
17678731	8.6282	9.18858	1.06495	0.00851523	Oasl2	NM_001009682
17828130	6.6029	7.03328	1.06518	0.0466997	---	GENSCAN00000042488
17764014	7.04791	7.51739	1.06661	0.0476915	---	---
17842140	10.3281	11.0177	1.06677	0.0100755	---	ENSRNOT00000080499
17632725	11.2319	11.9819	1.06677	0.0117937	---	ENSRNOT00000091141
17722336	5.27356	5.62591	1.06681	0.0316267	LOC100363294	NM_001270416
17866137	7.55377	8.05848	1.06682	0.0152144	RGD1563917	XR_349184
17663879	5.5713	5.94487	1.06705	0.0389997	Mir338	NR_031783
17760196	5.02882	5.36649	1.06715	0.0361525	LOC681186	XM_001060674
17676907	6.75747	7.21403	1.06756	0.0406937	Upk3bl	NM_001109020
17671916	6.19791	6.61914	1.06796	0.0446138	Olr1572	XM_008759142
17672731	9.54538	10.1985	1.06842	0.0237402	Fis1	NM_001105919
17691515	6.40825	6.84794	1.06861	0.0437524	LOC688553	NM_001135915
17785849	7.53138	8.04839	1.06865	0.0192131	Bhlhe40	NM_053328
17808188	4.84543	5.17807	1.06865	0.0275727	Tle1	NM_001173433
17782531	5.2399	5.59977	1.06868	0.0217118	Ttc26	NM_001025045
17676796	9.00184	9.62071	1.06875	0.0357243	LOC100910669	XM_008760835
17699849	4.5398	4.85259	1.0689	0.0235854	Loxl2	ENSRNOT00000058663
17881933	5.64436	6.03333	1.06891	0.0374563	---	XM_008758531
17648532	9.0119	9.63443	1.06908	0.00910983	---	---
17808471	7.12969	7.62344	1.06925	0.000372722	Fam29a	FQ230383
17789285	6.56725	7.02273	1.06936	0.00497145	---	GENSCAN00000010705
17853338	6.94544	7.42871	1.06958	0.014393	Map2k5	NM_001033987
17704710	8.63538	9.24138	1.07018	0.0320774	Dgkh	XM_001072779
17600237	6.82994	7.31061	1.07038	0.0151561	---	---
17876830	4.5495	4.86985	1.07041	0.0158244	---	ENSRNOT00000049138
17621377	7.29426	7.8092	1.0706	0.0310561	Plekha1	NM_001079894
17755547	5.48767	5.87682	1.07091	0.0386801	---	ENSRNOT00000078359
17670112	7.21641	7.72888	1.07102	0.0479755	---	ENSRNOT00000077510
17825043	6.10596	6.54036	1.07114	0.00140191	---	ENSRNOT00000065808
17672411	5.18356	5.55315	1.0713	0.0330793	Nxpe5	XM_008759318
17880863	6.02919	6.45914	1.07131	0.0138241	Smim24	XM_002726871
17741868	5.26991	5.64649	1.07146	0.0476309	Amigo1	NM_206881
17605699	6.0112	6.44079	1.07146	0.0353035	---	---
17603477	6.65051	7.12586	1.07148	0.0321705	---	---
17809258	5.47952	5.87126	1.07149	0.0324198	Zfyve9	NM_001107952
17795734	7.51603	8.05565	1.0718	0.0429614	---	ENSRNOT00000087464
17862587	8.14669	8.73171	1.07181	0.0329845	Treml4	XM_006226713
17745289	6.05692	6.49252	1.07192	0.0486839	Gpx8	NM_001106411
17608641	5.97801	6.40852	1.07202	0.00780318	---	---
17666271	9.52967	10.2197	1.0724	0.0330361	---	ENSRNOT00000086324
17870009	6.04576	6.48476	1.07261	0.0197555	LOC100363372	XM_003751991
17715062	7.42581	7.96511	1.07263	0.0195507	Adtrp	NM_001014144
17746481	4.85531	5.20843	1.07273	0.0284461	Crh	NM_031019
17609845	6.64304	7.12675	1.07281	0.0268543	---	---
17603617	9.42693	10.1134	1.07283	0.0328186	---	---
17789192	7.16817	7.69037	1.07285	0.0195821	Crot	NM_031987
17836123	8.42666	9.04095	1.0729	0.0275594	Irak3	NM_001108101
17677810	4.69063	5.03267	1.07292	0.0444263	---	ENSRNOT00000081769
17625123	6.88792	7.39103	1.07304	0.0265579	Ifit1	ENSRNOT00000025770
17695991	6.19115	6.6446	1.07324	0.00279984	---	---
17839047	7.15224	7.67639	1.07329	0.0477012	Mfng	NM_199110
17605831	7.71993	8.28653	1.0734	0.00677132	---	---
17624393	7.21485	7.74511	1.0735	0.0259959	Prune2	XM_006231152
17632723	10.6798	11.4659	1.0736	0.0129273	---	ENSRNOT00000087746
17681477	5.28827	5.67803	1.0737	0.047782	Sele	NM_138879
17603223	6.72052	7.21616	1.07375	0.0207879	---	---
17834858	6.77928	7.27989	1.07384	0.0343165	Dram1	NM_001173427
17700678	5.06798	5.4429	1.07398	0.043433	Cldn10	NM_001106058
17865955	5.53393	5.94371	1.07405	0.0197119	---	NONRATT058201
17859645	10.6878	11.4793	1.07406	0.00733397	---	ENSRNOT00000083445
17609989	5.40627	5.80686	1.0741	0.0438784	---	---
17874579	6.68027	7.1753	1.0741	0.0338529	RGD1564845	XM_008758478
17696164	10.2131	10.9728	1.07439	0.0474462	---	ENSRNOT00000090631
17608857	6.89795	7.41189	1.07451	0.00641586	---	---
17616068	4.79448	5.15257	1.07469	0.00378651	Fam71e1	XM_001077811
17628511	6.87109	7.38468	1.07475	0.0451182	---	ENSRNOT00000091196
17816850	6.0937	6.5505	1.07496	0.0495984	---	ENSRNOT00000084948
17688307	8.22715	8.8449	1.07509	0.0477319	Wdfy3	NM_001170551
17609229	5.35726	5.76016	1.07521	0.0149923	---	---
17781204	5.12091	5.50711	1.07542	0.0316107	Steap2	NM_001107846
17817588	5.7251	6.15701	1.07544	0.0220117	Ift43	NM_001134525
17657197	4.82082	5.18517	1.07558	0.0159511	Zfp287	NM_001107008
17768901	4.30279	4.62931	1.07588	0.0450795	Snx21	XM_008775625
17672714	7.51682	8.08743	1.07591	0.0241982	RGD1566006	XM_006249195
17734990	6.20738	6.67885	1.07595	0.0422967	Pou5f2	NM_001081751
17735497	8.04123	8.65281	1.07605	0.0272661	Cd180	NM_001106405
17665106	4.51762	4.86212	1.07626	0.0475145	Olr1528	NM_001001099
17715330	7.61371	8.19686	1.07659	0.0347574	---	NONRATT024133
17610935	7.06928	7.61227	1.07681	0.0237745	L3mbtl3	XM_003748666
17792709	6.96501	7.5025	1.07717	0.0431274	Exoc6b	NM_001109246
17600077	4.89954	5.27942	1.07753	0.0394956	---	---
17684469	5.45341	5.87743	1.07775	0.00129968	---	---
17604117	6.22741	6.71475	1.07826	0.0207395	---	---
17795541	8.40033	9.06007	1.07854	0.0182693	Ly49si2	NM_001009498
17633143	5.38959	5.8134	1.07863	0.0232953	Sergef	XM_001080802
17877674	3.73505	4.02905	1.07872	0.0318868	---	ENSRNOT00000004460
17765071	6.45096	6.95917	1.07878	0.0478648	Dll4	NM_001107760
17870865	6.43052	6.93722	1.0788	0.040999	Cask	NM_022184
17702438	5.28918	5.70617	1.07884	0.0167077	---	GENSCAN00000058645
17872257	10.3474	11.1633	1.07886	0.00638823	---	ENSRNOT00000091839
17731446	5.50173	5.93661	1.07904	0.0228726	Mmp15	NM_001106168
17859653	5.71627	6.16926	1.07925	0.0477664	---	ENSRNOT00000080611
17668368	5.79293	6.25247	1.07933	0.0392892	Mina	NM_153309
17698315	6.00082	6.47916	1.07971	0.0427516	---	AB036696
17603023	5.74718	6.20646	1.07991	0.0229691	---	---
17609679	5.26383	5.6848	1.07997	0.0335936	---	---
17772405	8.09156	8.73996	1.08013	0.0308416	Cytip	NM_001012086
17813426	6.15783	6.65158	1.08018	0.0104928	Klhl17	NM_145671
17602719	5.17777	5.59377	1.08034	0.0271874	---	---
17687187	6.00636	6.49006	1.08053	0.0109517	Nvl	NM_001105980
17874930	9.58404	10.3571	1.08067	0.0184369	---	ENSRNOT00000089543
17605039	5.67625	6.13466	1.08076	0.0350392	---	---
17607445	5.67188	6.13057	1.08087	0.0133685	---	---
17828543	5.0395	5.44719	1.0809	0.015323	Lrig3	XM_001055013
17708414	8.79276	9.50717	1.08125	0.0143384	---	---
17697861	6.34232	6.85951	1.08155	0.00163162	Gpr137c	NM_001134541
17754816	6.29072	6.8045	1.08167	0.0125313	Rufy2	NM_001168586
17802139	6.66996	7.21517	1.08174	0.0205555	Col8a2	XM_001057987
17789808	10.1558	10.9888	1.08202	0.00857159	---	ENSRNOT00000087755
17882677	7.4882	8.10259	1.08205	0.0178822	---	NM_001012235
17793650	5.09643	5.51545	1.08222	0.0183789	---	GENSCAN00000045049
17864163	4.79277	5.18702	1.08226	0.0397704	---	ENSRNOT00000088797
17858542	5.76792	6.24271	1.08232	0.0406235	---	ENSRNOT00000051584
17600253	6.02071	6.51641	1.08233	0.0387649	---	---
17604687	5.5985	6.05952	1.08235	0.0353526	---	---
17605661	5.30178	5.73901	1.08247	0.00910302	---	---
17624523	9.76764	10.5732	1.08247	0.0132672	---	ENSRNOT00000079288
17736690	9.76764	10.5732	1.08247	0.0132672	---	ENSRNOT00000079288
17739042	9.76764	10.5732	1.08247	0.0132672	---	ENSRNOT00000079288
17839395	9.76764	10.5732	1.08247	0.0132672	LOC102549144	XR_593658
17856988	9.76764	10.5732	1.08247	0.0132672	---	ENSRNOT00000079288
17669396	7.34767	7.95745	1.08299	1.9511e-05	---	ENSRNOT00000080344
17882475	4.37021	4.73303	1.08302	0.0287942	---	XM_006225501
17781957	6.61537	7.16622	1.08327	0.0327097	Lipogenin	NM_145790
17843465	7.91386	8.57459	1.08349	0.0316826	---	ENSRNOT00000080953
17794657	7.49296	8.11941	1.08361	0.0284585	Clec4e	NM_001005897
17869130	5.32735	5.77292	1.08364	0.0294948	Ak5	XM_008757912
17746437	4.99126	5.40963	1.08382	0.0244056	Cyp7b1	NM_019138
17623687	6.41342	6.95169	1.08393	0.0195384	---	ENSRNOT00000082766
17839274	7.52063	8.15514	1.08437	0.0211709	---	ENSRNOT00000077507
17712654	4.18718	4.54092	1.08448	0.0274236	---	XM_008771371
17818321	7.95515	8.62733	1.0845	0.0225101	Evl	NM_024147
17629660	6.78839	7.36234	1.08455	0.0437151	Fcar	NM_201992
17609795	5.73415	6.21922	1.08459	0.000458362	---	---
17848650	6.45777	7.00601	1.0849	0.0243782	Itga9	XM_008757902
17608759	5.26132	5.70803	1.08491	0.0353445	---	---
17881599	6.99523	7.58953	1.08496	0.0393662	---	---
17881741	6.99523	7.58953	1.08496	0.0393662	---	---
17835470	6.78064	7.35786	1.08513	0.00487577	Mettl25	NM_001108089
17635898	6.87957	7.46592	1.08523	0.0113131	LOC499229	XM_001075550
17817269	4.69399	5.0941	1.08524	0.0439641	Papln	XM_006225840
17762026	5.08188	5.51525	1.08528	0.00635033	---	GENSCAN00000021449
17832893	4.53588	4.92344	1.08544	0.0481788	Slc39a5	NM_001108728
17619462	7.28511	7.90886	1.08562	0.00247913	---	ENSRNOT00000083317
17746435	9.08412	9.86222	1.08565	0.0142487	---	ENSRNOT00000086840
17600021	6.06618	6.58948	1.08627	0.0216774	---	---
17709297	5.02978	5.46442	1.08641	0.0403955	---	ENSRNOT00000057740
17669608	8.17737	8.88925	1.08706	0.0034531	---	ENSRNOT00000082127
17794983	9.88504	10.7502	1.08753	0.0135321	---	ENSRNOT00000084000
17761856	6.467	7.03599	1.08798	0.00159314	---	---
17676776	4.29724	4.67567	1.08806	0.0136267	---	GENSCAN00000006109
17874422	5.58886	6.0812	1.08809	0.00862923	Arhgap36	XM_001069533
17869056	6.40129	6.96582	1.08819	0.0325756	Sowahc	NM_001109364
17651031	4.55821	4.96171	1.08852	0.0208474	LOC100364862	XM_006221026
17725088	4.66626	5.07994	1.08865	0.0302285	---	ENSRNOT00000086227
17787572	5.19228	5.654	1.08892	0.024529	Clec9a	NM_001109354
17815867	6.46741	7.04277	1.08896	0.00908999	---	ENSRNOT00000085819
17737044	6.99609	7.61879	1.08901	0.00543511	LOC100909964	XM_003751228
17852458	5.97577	6.50769	1.08901	0.0137896	---	GENSCAN00000001647
17726157	5.52488	6.01887	1.08941	0.0394646	Ticam2	NM_001108890
17609837	5.33616	5.81378	1.08951	0.00855351	---	---
17626410	5.40008	5.88426	1.08966	0.0377932	Ins1	NM_019129
17626561	8.26878	9.01017	1.08966	0.00495933	Tcf7l2	XM_008760555
17791155	8.93357	9.735	1.08971	0.0387726	---	NONRATT016812
17663090	6.89831	7.51864	1.08993	0.019541	Cd300le	NM_001202463
17604229	4.84239	5.27801	1.08996	0.0387049	---	---
17606741	5.19362	5.6611	1.09001	0.0455728	---	---
17600109	6.05342	6.60044	1.09036	0.0131957	---	---
17682317	5.73918	6.25805	1.09041	0.0293247	Kmo	NM_021593
17736456	4.27615	4.66295	1.09046	0.0067662	---	NONRATT031100
17718771	5.71957	6.23793	1.09063	0.00379598	Phactr1	NM_214457
17787809	4.85319	5.29313	1.09065	0.0492662	LOC500354	NM_001037797
17882329	5.34894	5.83535	1.09094	0.0124371	---	XM_001053747
17756346	7.06036	7.70278	1.09099	0.0391862	Ltb	NM_212507
17658137	5.27552	5.756	1.09108	0.036556	Chrne	NM_017194
17658663	4.38859	4.78937	1.09132	0.0221105	Doc2b	NM_031142
17705578	5.02583	5.48517	1.0914	0.0182779	Ipo5	XM_001075101
17670118	8.99423	9.82115	1.09194	0.0280598	---	ENSRNOT00000077490
17610505	4.35072	4.75268	1.09239	0.0420559	Epm2a	NM_001276762
17606543	5.03411	5.49952	1.09245	0.0464888	---	---
17708289	6.19025	6.76265	1.09247	0.0386833	---	ENSRNOT00000081731
17878832	5.15206	5.629	1.09257	0.00278095	Armcx2	NM_001014274
17714873	5.33373	5.82772	1.09262	0.0414398	Ptpdc1	NM_001106104
17774693	4.22022	4.61119	1.09264	0.0176986	Prdm11	NM_001271530
17874683	4.76389	5.20559	1.09272	0.0323603	Vgll1	XM_008758585
17603429	5.94255	6.49362	1.09273	0.0468329	---	---
17604631	7.29892	7.97776	1.09301	0.0105031	---	---
17681325	9.44623	10.3275	1.09329	0.0126415	---	ENSRNOT00000062348
17863770	5.7798	6.31963	1.0934	0.041517	Neurl3	NM_001014100
17882621	4.49542	4.9159	1.09353	0.00536601	---	NM_181384
17603399	6.30686	6.89678	1.09354	0.024837	---	---
17843424	5.27261	5.76751	1.09386	0.0454058	Zfp202	NM_001109290
17638511	3.87504	4.23893	1.09391	0.0308277	---	NONRATT006776
17783565	4.80575	5.25797	1.0941	0.0127309	Nfe2l3	NM_001305047
17706032	6.53997	7.15578	1.09416	0.00695912	---	GENSCAN00000017132
17671285	6.34819	6.94719	1.09436	0.0191877	Fcer2	NM_001033924
17600249	6.04416	6.61587	1.09459	0.0370621	---	---
17697961	6.22055	6.80896	1.09459	0.0346529	---	ENSRNOT00000088547
17600909	4.54285	4.97267	1.09461	0.0300873	---	---
17601229	4.54285	4.97267	1.09461	0.0300873	---	---
17756337	9.29271	10.1739	1.09483	0.0458617	---	ENSRNOT00000088691
17603173	4.79126	5.24683	1.09508	0.0291455	---	---
17791076	5.00392	5.48003	1.09515	0.025298	Olr804	NM_001000852
17644009	6.18589	6.77489	1.09522	0.0233077	Nlrc3	XM_006220565
17855551	4.65373	5.09749	1.09536	0.0417075	Sema3b	NM_001079942
17723951	5.70829	6.25346	1.09551	0.0117915	---	ENSRNOT00000080776
17861310	8.80368	9.64454	1.09551	0.0366286	---	ENSRNOT00000081699
17635184	9.67341	10.6004	1.09583	0.0239561	---	ENSRNOT00000079066
17670116	7.8811	8.63639	1.09584	0.0031226	---	ENSRNOT00000078004
17752139	5.50761	6.03652	1.09603	0.0403012	Tyw3	XM_001080203
17876849	5.79781	6.35627	1.09632	0.0190258	Tspyl2	NM_001191618
17834736	5.43731	5.96248	1.09659	0.0367945	Eid3	NM_001044304
17725346	5.88032	6.44923	1.09675	0.00849066	LOC498836	NM_001047935
17786046	4.40689	4.83375	1.09686	0.0159507	Ttll3	NM_001108640
17749668	6.35652	6.97337	1.09704	0.00954353	---	ENSRNOT00000082817
17782860	5.24432	5.75419	1.09722	0.0195858	Trbv13-2	ENSRNOT00000091655
17842356	6.42593	7.051	1.09727	0.0450485	---	ENSRNOT00000086228
17661049	4.90675	5.38535	1.09754	0.028881	Krtap1-5	NM_001025135
17640579	4.57873	5.02565	1.09761	0.0247652	Tmem132a	NM_178021
17676012	4.56132	5.00849	1.09804	0.0371235	---	GENSCAN00000036104
17743645	5.76533	6.33205	1.0983	0.0297542	Negr1	NM_021682
17730478	5.45965	5.99667	1.09836	0.0115489	---	GENSCAN00000007883
17715033	5.47909	6.01885	1.09851	0.036217	---	ENSRNOT00000092038
17882239	4.74835	5.21636	1.09856	0.0465946	---	XM_006220963
17731912	6.07112	6.66992	1.09863	0.049929	Capns2	NM_001109380
17609571	5.79808	6.37243	1.09906	0.0106983	---	---
17760451	7.04899	7.74814	1.09918	0.0139429	---	ENSRNOT00000077431
17720404	3.74665	4.11892	1.09936	0.0370617	LOC102550988	XM_008771799
17761956	7.6879	8.45287	1.0995	0.0379919	RGD1561736	XM_006224408
17651323	3.94078	4.33304	1.09954	0.036557	---	ENSRNOT00000077603
17779695	6.74076	7.41238	1.09964	0.031874	---	ENSRNOT00000080566
17849826	6.3877	7.02448	1.09969	0.00437987	---	ENSRNOT00000091276
17880084	7.68391	8.44994	1.09969	0.0414283	Rpl10	FQ220555
17700524	5.50036	6.04897	1.09974	0.0267888	---	GENSCAN00000032073
17763548	5.48701	6.03615	1.10008	0.027335	Tnks1bp1	XM_001069984
17840809	5.33111	5.86466	1.10008	0.0109486	---	NONRATT060008
17746778	4.83636	5.32131	1.10027	0.0049241	---	ENSRNOT00000077191
17830042	4.98962	5.49114	1.10051	0.00707746	RGD1563870	XM_006226132
17775958	6.43131	7.07808	1.10057	0.00786207	Pla2g4e	XM_001080884
17605825	5.37953	5.92186	1.10081	0.0469744	---	---
17668004	7.17541	7.8993	1.10088	0.0498618	Rcan1	NM_153724
17644086	4.22072	4.64745	1.10111	0.0246578	Cldn6	NM_001102364
17680754	5.14153	5.66177	1.10118	0.0251207	LOC102549528	XR_358970
17608739	6.1243	6.74446	1.10126	0.0338521	---	---
17646114	6.3943	7.0425	1.10137	0.00699828	---	ENSRNOT00000085028
17772562	4.8555	5.34876	1.10159	0.0180468	Pla2r1	NM_001100837
17646717	8.16804	9.00065	1.10194	0.0219704	---	ENSRNOT00000085658
17704935	6.71625	7.40088	1.10194	0.0246851	---	---
17600229	6.51038	7.17464	1.10203	0.0482072	---	---
17857996	5.43986	5.99576	1.10219	0.0137966	---	GENSCAN00000027115
17656451	5.25425	5.79238	1.10242	0.0263909	LOC691286	NM_001109634
17840439	7.67883	8.46577	1.10248	0.0441031	RGD1564963	XM_006226245
17608885	5.72357	6.31077	1.10259	0.0304483	---	---
17859318	6.664	7.35047	1.10301	0.00350343	Spats2l	NM_001014102
17608037	5.20919	5.7474	1.10332	0.0444724	---	---
17882041	6.32833	6.98273	1.10341	0.0204309	---	XM_008767525
17827963	4.48836	4.95655	1.10431	0.0477271	Rassf9	NM_022959
17809654	9.71855	10.734	1.10448	0.0111226	---	ENSRNOT00000087225
17840244	5.65442	6.24672	1.10475	0.0452699	Abcd2	NM_033352
17659799	4.78113	5.28206	1.10477	0.0281278	---	ENSRNOT00000083038
17790749	5.13614	5.67528	1.10497	0.04281	Klrg2	XM_001072378
17754515	6.26463	6.9239	1.10524	7.29822e-05	Prmt2	ENSRNOT00000050531
17630609	6.45447	7.1356	1.10553	0.031422	Pou2f2	NM_001271204
17790578	4.78959	5.29674	1.10589	0.02506	Fam180a	NM_001108621
17643356	4.64499	5.13685	1.10589	0.0123858	---	GENSCAN00000016959
17628461	6.09222	6.73866	1.10611	0.00797785	---	---
17710715	5.68448	6.28831	1.10623	0.0408561	Abhd8	NM_001107301
17698012	5.66331	6.26718	1.10663	0.00101796	Peli2	NM_001107259
17862007	4.17638	4.62179	1.10665	0.0333878	---	ENSRNOT00000092057
17639197	5.16163	5.71253	1.10673	0.025317	Ankrd13d	NM_001108514
17843274	4.20013	4.64852	1.10676	0.0295281	Olr1229	NM_001000444
17722380	5.39267	5.96956	1.10698	0.0268378	Mir1949	NR_037361
17848896	9.10978	10.0852	1.10708	0.0141592	---	ENSRNOT00000090176
17665660	5.44916	6.03288	1.10712	0.0380656	Boc	XM_003751052
17604311	5.36546	5.94042	1.10716	0.00281644	---	---
17749947	5.86041	6.48871	1.10721	0.0170128	Cd2	NM_012830
17657302	4.23694	4.69137	1.10725	0.0389249	Dnah9	XM_002724507
17633870	4.80003	5.31576	1.10744	0.0497127	Synm	NM_001134858
17634598	8.8568	9.81099	1.10774	0.00653281	---	ENSRNOT00000078695
17605503	4.62027	5.11862	1.10786	0.0452453	---	---
17754240	4.23523	4.69286	1.10805	0.00329308	LOC690415	NM_001109590
17863039	4.96839	5.50562	1.10813	0.023053	Cyp39a1	NM_001106893
17794149	5.21067	5.77443	1.10819	0.0458097	---	ENSRNOT00000091169
17753894	4.751	5.26503	1.10819	0.0172221	Glp1r	NM_012728
17649952	9.57387	10.6098	1.1082	0.00598578	---	ENSRNOT00000080772
17649960	9.57387	10.6098	1.1082	0.00598578	---	ENSRNOT00000079504
17649962	9.57387	10.6098	1.1082	0.00598578	---	ENSRNOT00000080495
17706642	4.89826	5.42918	1.10839	0.0199362	Dydc1	XM_006222160
17600291	5.87519	6.51365	1.10867	0.0330347	---	---
17878760	5.74928	6.37529	1.10888	0.0312996	LOC102555917	XM_008758509
17795160	4.39451	4.87317	1.10892	0.025661	LOC689519	XM_006225063
17759156	7.62596	8.45767	1.10906	0.0244461	---	ENSRNOT00000086077
17836473	4.88353	5.41726	1.10929	0.0340665	Kif5a	NM_212523
17794646	6.5729	7.29314	1.10958	0.024841	C3ar1	NM_032060
17703427	4.37857	4.85879	1.10968	0.00670725	---	ENSRNOT00000090169
17604651	5.79777	6.43401	1.10974	0.0309758	---	---
17662513	7.70665	8.55794	1.11046	0.0151766	---	ENSRNOT00000079258
17752747	5.25525	5.83646	1.1106	0.0164973	Tnf	NM_012675
17882639	6.63976	7.37416	1.11061	0.046333	---	NM_198131
17706615	7.32751	8.14088	1.111	0.00115304	---	ENSRNOT00000089356
17604367	5.99493	6.66164	1.11121	0.0286341	---	---
17725934	4.87458	5.41782	1.11144	0.0024215	Prelid2	NM_001271333
17683592	9.94146	11.0498	1.11149	0.00850988	---	ENSRNOT00000090418
17841858	4.50915	5.01229	1.11158	0.0473561	Mmp12	NM_053963
17600223	6.00824	6.68041	1.11187	0.0291128	---	---
17731798	5.47747	6.09081	1.11198	0.0340141	Large	NM_001108439
17602231	5.02694	5.59133	1.11227	0.00202863	---	---
17879295	4.58828	5.10354	1.1123	0.0194363	MGC114492	NM_001024895
17820661	5.11196	5.6864	1.11237	0.029832	Trim54	NM_001013217
17604993	4.55001	5.06149	1.11241	0.023911	---	---
17673387	10.483	11.6634	1.1126	0.00383298	---	ENSRNOT00000089881
17629126	4.78069	5.31991	1.11279	0.037956	---	GENSCAN00000004678
17812668	8.35904	9.30219	1.11283	0.00424683	---	ENSRNOT00000086923
17795515	6.31302	7.0265	1.11302	0.0185776	LOC497796	NM_001111310
17757127	6.01182	6.69133	1.11303	0.0140916	---	ENSRNOT00000087296
17609261	5.78568	6.44091	1.11325	0.0407954	---	---
17764101	6.08064	6.77211	1.11372	0.0496084	---	ENSRNOT00000086512
17825498	6.26686	6.98188	1.11409	0.0360635	---	ENSRNOT00000091815
17600099	6.4775	7.21669	1.11412	0.0173428	---	---
17605331	5.15869	5.74787	1.11421	0.0197844	---	---
17630268	4.65795	5.19175	1.1146	0.0209949	---	ENSRNOT00000081082
17600805	6.07838	6.77765	1.11504	0.0197273	---	---
17605171	5.01084	5.5881	1.1152	0.0141131	---	---
17724289	7.573	8.44833	1.11559	0.028349	---	ENSRNOT00000078900
17708013	5.51294	6.15102	1.11574	0.00773652	Klkb1	NM_012725
17615171	5.04556	5.63009	1.11585	0.0150876	Zfp383	XM_006228746
17766558	5.39046	6.01687	1.11621	0.0305129	Plcb1	NM_001077641
17834307	5.32314	5.94395	1.11662	0.0403267	Cyp4f6	NM_153318
17780379	3.93055	4.3901	1.11692	0.0342204	---	---
17748424	6.45165	7.20783	1.11721	0.0238886	---	ENSRNOT00000086795
17602263	5.22077	5.83587	1.11782	0.0152902	---	---
17606121	5.81104	6.49659	1.11797	0.0158703	---	---
17604951	5.15796	5.76657	1.11799	0.0200105	---	---
17844986	8.45081	9.45125	1.11838	0.0114392	---	ENSRNOT00000083337
17750608	4.53356	5.07099	1.11854	0.0403187	RGD1310209	XR_085774
17795586	4.80663	5.37764	1.1188	0.0206024	Ly49s6	ENSRNOT00000079975
17665483	5.62878	6.30021	1.11928	0.000148084	Trat1	NM_001037981
17608823	4.51982	5.0599	1.11949	0.0146569	---	---
17842132	8.33648	9.34319	1.12076	0.0011765	Taf1d	XM_008765941
17844687	8.33648	9.34319	1.12076	0.0011765	---	ENSRNOT00000082211
17653639	6.08701	6.82364	1.12102	0.0457591	Snn	NM_001034083
17667228	5.63205	6.3137	1.12103	0.000164179	---	ENSRNOT00000079151
17690621	4.15703	4.66017	1.12103	0.0161403	Sorcs2	NM_001107225
17652978	5.32957	5.97482	1.12107	0.0304879	Mgat5b	NM_001107068
17668556	5.0333	5.64281	1.1211	0.0282252	---	---
17861243	4.66613	5.23128	1.12112	0.0290363	RGD1311447	NM_001134587
17695845	4.89756	5.49155	1.12128	0.00735057	Ccdc157	XM_001062582
17701790	4.68358	5.25211	1.12139	0.0008005	---	ENSRNOT00000090523
17634766	3.71752	4.16908	1.12147	0.0342154	Olr16	NM_001000694
17839104	4.75118	5.32845	1.1215	0.0362901	Sox10	NM_019193
17821089	6.48878	7.27737	1.12153	0.00989625	---	ENSRNOT00000086956
17605421	6.12593	6.87114	1.12165	0.00834119	---	---
17871267	4.37144	4.90431	1.1219	0.0388801	Mir501	NR_032108
17864112	7.73069	8.67438	1.12207	0.0047811	---	ENSRNOT00000085682
17602983	5.35222	6.00696	1.12233	0.00362925	---	---
17603651	5.19536	5.83133	1.12241	0.0310122	---	---
17724811	4.77199	5.3565	1.12249	0.00780262	---	GENSCAN00000041273
17830985	5.20972	5.84831	1.12258	0.0196445	Tef	NM_019194
17808428	9.66089	10.8461	1.12268	0.000732321	---	ENSRNOT00000077459
17722383	10.7731	12.095	1.12271	0.00275032	---	ENSRNOT00000077339
17723195	5.78261	6.49389	1.123	0.0256484	---	ENSRNOT00000091740
17622674	5.42886	6.09732	1.12313	0.0497901	---	---
17737182	4.22088	4.74155	1.12335	0.0435872	Slc10a5	NM_001025280
17674965	6.89812	7.7506	1.12358	0.0438659	---	---
17770731	8.5263	9.58442	1.1241	0.00130561	---	ENSRNOT00000078426
17856201	4.66875	5.24827	1.12413	0.0053222	---	ENSRNOT00000088307
17661785	3.42812	3.85401	1.12423	0.0335472	Pyy	NM_001034080
17839737	7.32968	8.24227	1.12451	0.0248985	---	ENSRNOT00000082070
17630020	4.63584	5.21314	1.12453	0.00429414	---	ENSRNOT00000084625
17609539	4.98703	5.6085	1.12462	0.0441184	---	---
17848607	5.53965	6.23034	1.12468	0.00212982	Eomes	XM_006226608
17881879	5.2164	5.86725	1.12477	0.0487379	---	XM_001060106
17605849	4.68247	5.26851	1.12516	0.0276317	---	---
17600827	5.67448	6.38497	1.12521	0.0448702	---	---
17733194	4.20716	4.73479	1.12541	0.044422	Ctrl	NM_054009
17739798	5.92109	6.66417	1.1255	0.000394162	---	ENSRNOT00000079068
17775329	3.63625	4.09296	1.1256	0.0421539	Olr791	NM_001000580
17607307	5.20942	5.86501	1.12585	0.0053619	---	---
17758929	3.64557	4.10456	1.1259	0.0395922	---	GENSCAN00000007051
17608257	5.49637	6.18927	1.12607	0.047952	---	---
17609731	5.13027	5.77868	1.12639	0.00476199	---	---
17764753	5.26854	5.93684	1.12685	0.0288497	Fmn1	XM_006224644
17602925	4.83019	5.44436	1.12715	0.0442309	---	---
17603743	5.2115	5.87602	1.12751	0.0370831	---	---
17610001	5.24566	5.91514	1.12763	0.00356875	---	---
17603831	5.79855	6.53954	1.12779	0.00662648	---	---
17604187	4.37766	4.93803	1.12801	0.0123226	---	---
17766359	4.83759	5.45726	1.12809	0.00285829	---	ENSRNOT00000086857
17602605	4.32515	4.87965	1.1282	0.0434401	---	---
17864430	4.13392	4.66438	1.12832	0.00212697	---	ENSRNOT00000083077
17633068	5.25415	5.92863	1.12837	0.0133028	Abcc8	NM_013039
17674934	9.32959	10.5276	1.12841	0.00324754	---	ENSRNOT00000053446
17674936	9.32959	10.5276	1.12841	0.00324754	---	ENSRNOT00000053446
17674938	9.32959	10.5276	1.12841	0.00324754	---	ENSRNOT00000053446
17882811	9.32959	10.5276	1.12841	0.00324754	---	ENSRNOT00000053446
17882813	9.32959	10.5276	1.12841	0.00324754	---	ENSRNOT00000053446
17882815	9.32959	10.5276	1.12841	0.00324754	---	ENSRNOT00000053446
17600601	5.02641	5.67257	1.12855	0.000941501	---	---
17610115	5.02641	5.67257	1.12855	0.000941501	---	---
17795527	7.47061	8.43227	1.12873	0.0207817	Ly49si1	NM_001009497
17834474	3.57921	4.04105	1.12903	0.0396585	RGD1565071	XM_001079328
17612506	5.138	5.80244	1.12932	0.006553	Zfp52	NM_001014158
17860505	4.8881	5.5223	1.12974	0.0350655	Cyp27a1	NM_178847
17600501	5.31046	5.99951	1.12975	0.0120039	---	---
17607563	5.47698	6.1908	1.13033	0.031501	---	---
17608981	5.47698	6.1908	1.13033	0.031501	---	---
17644349	4.93633	5.57986	1.13037	0.00357038	---	ENSRNOT00000081773
17771174	4.73141	5.35464	1.13172	0.0288691	Ptges	NM_021583
17650515	4.33954	4.91213	1.13195	0.0499883	Hoxb9	NM_001100497
17664863	3.72471	4.21631	1.13198	0.0387908	Sim2	NM_001107108
17652123	5.0394	5.70526	1.13213	0.0188818	---	ENSRNOT00000081749
17752800	9.56423	10.8303	1.13237	0.00267121	---	ENSRNOT00000083081
17606075	4.95863	5.61628	1.13263	0.030779	---	---
17674327	6.06046	6.86437	1.13265	0.0450615	---	ENSRNOT00000081564
17769015	9.06561	10.2685	1.13269	0.00303444	---	ENSRNOT00000053446
17755250	6.70518	7.59534	1.13276	0.0193434	Dse	NM_001108933
17698694	4.45013	5.04179	1.13295	0.0170169	Cmtm5	NM_001106034
17622279	11.0787	12.5528	1.13306	1.28678e-05	---	ENSRNOT00000078706
17878822	4.39276	4.97793	1.13321	0.00826273	Armcx6	NM_001007757
17732027	5.11189	5.79334	1.13331	0.0324758	Cyld	ENSRNOT00000091626
17640313	9.66954	10.965	1.13398	0.0208272	---	ENSRNOT00000086318
17640315	9.66954	10.965	1.13398	0.0208272	---	ENSRNOT00000086318
17602419	4.93702	5.60051	1.13439	0.017288	---	---
17878133	4.31779	4.90004	1.13485	0.0229764	---	ENSRNOT00000090479
17831177	6.50055	7.37788	1.13496	0.0354779	---	ENSRNOT00000078385
17844970	6.50055	7.37788	1.13496	0.0354779	---	ENSRNOT00000078385
17611073	8.02395	9.10771	1.13507	0.0011399	---	ENSRNOT00000084929
17876453	3.77495	4.28714	1.13568	0.0389259	RGD1563606	ENSRNOT00000003981
17764152	4.39408	4.99151	1.13596	0.01713	---	---
17768666	6.35167	7.21587	1.13606	0.00991624	---	ENSRNOT00000052983
17757449	4.30018	4.88691	1.13644	0.0391924	Cbs	NM_012522
17608477	5.38101	6.11541	1.13648	0.00899793	---	---
17787622	4.69168	5.33265	1.13662	0.0264274	Prr21	NM_139184
17675730	4.43887	5.04648	1.13688	0.00125783	Cyp3a2	NM_153312
17614147	4.1013	4.66415	1.13723	0.0209769	LOC102548600	XM_008759057
17789982	4.78428	5.44333	1.13775	0.0448605	Cadps2	XM_001060172
17607139	5.86001	6.67202	1.13857	0.00653606	---	---
17616002	5.72101	6.51531	1.13884	0.00719318	---	ENSRNOT00000088583
17636806	4.95148	5.64076	1.13921	0.0401313	---	ENSRNOT00000084089
17621918	5.74758	6.54791	1.13925	0.0283588	Prap1	NM_031669
17604869	5.4237	6.18005	1.13945	0.0434548	---	---
17840724	5.96753	6.8005	1.13958	0.00624317	---	ENSRNOT00000079851
17623677	7.09931	8.09036	1.1396	0.0177331	---	ENSRNOT00000091683
17668900	5.5891	6.37081	1.13986	0.0272466	Cd200r1l	XM_006221131
17879977	6.08864	6.94393	1.14047	0.00285192	---	ENSRNOT00000077572
17875310	4.36404	4.97842	1.14078	0.0218404	Sh2d1a	NM_001109313
17880732	4.29446	4.89905	1.14078	0.0139825	RGD1309291	XR_145981
17782636	5.30361	6.05119	1.14096	0.00277943	Tmem178b	NM_001195277
17604293	5.02992	5.73908	1.14099	0.0307609	---	---
17831049	4.65968	5.31722	1.14111	0.0328115	Mei1	NM_001130555
17839665	4.01404	4.5821	1.14152	0.0174105	RGD1566029	XM_006226181
17696324	4.65211	5.31253	1.14196	0.0265563	---	---
17653002	6.03668	6.89391	1.142	0.014683	---	ENSRNOT00000081692
17602333	6.18915	7.07479	1.14309	0.00657588	---	---
17603093	5.14222	5.87819	1.14312	0.0297559	---	---
17752445	4.2714	4.88313	1.14322	0.0140841	RT1-T18	NM_001002821
17609499	5.37517	6.14665	1.14353	0.00476652	---	---
17645038	6.25802	7.157	1.14365	0.0102287	---	ENSRNOT00000080287
17836741	6.25802	7.157	1.14365	0.0102287	---	ENSRNOT00000080287
17840722	5.70081	6.52046	1.14378	0.00862645	---	ENSRNOT00000081038
17761570	5.86104	6.706	1.14417	0.00384705	---	ENSRNOT00000090384
17606773	5.49092	6.28267	1.14419	0.0249672	---	---
17809625	4.89129	5.5981	1.1445	0.0253923	Plk3	NM_022187
17611071	7.21852	8.2639	1.14482	0.00498137	---	ENSRNOT00000077255
17608137	4.73062	5.41577	1.14483	0.0350099	---	---
17674844	8.2909	9.49927	1.14575	0.017361	---	ENSRNOT00000077456
17734841	5.59257	6.40937	1.14605	0.0218277	Pcsk1	NM_017091
17706987	8.7195	9.99649	1.14645	0.0102905	---	ENSRNOT00000085683
17749159	3.57388	4.09902	1.14694	0.0363058	LOC102553778	XM_006224196
17722610	7.16669	8.2218	1.14722	0.001775	---	NONRATT025802
17600089	4.63529	5.32299	1.14836	0.0387071	---	---
17861864	4.34872	4.99457	1.14852	0.0214177	Bok	NM_017312
17603597	4.83674	5.55684	1.14888	0.0231004	---	---
17778969	5.98047	6.8759	1.14973	0.0473841	---	ENSRNOT00000086898
17605679	4.94325	5.68422	1.14989	0.0488356	---	---
17604697	4.36491	5.02016	1.15012	0.0286427	---	---
17751221	7.43347	8.55073	1.1503	0.0123653	---	ENSRNOT00000086241
17840701	3.81183	4.38643	1.15074	0.0216086	Olr1106	NM_001000423
17607619	4.81021	5.53651	1.15099	0.00279715	---	---
17609037	4.81021	5.53651	1.15099	0.00279715	---	---
17606093	5.33103	6.13603	1.151	0.00773047	---	---
17644254	8.55752	9.84981	1.15101	0.00565112	---	ENSRNOT00000080140
17779805	3.82416	4.40172	1.15103	0.0325606	Mir296	NR_031940
17616319	4.19686	4.83219	1.15138	0.0325347	Lhb	NM_001033975
17789082	7.28685	8.3982	1.15251	0.00935921	---	ENSRNOT00000053977
17875155	4.10279	4.72907	1.15265	0.034864	Avpr2	NM_019136
17604913	4.4575	5.14068	1.15327	0.001358	---	---
17798022	5.22577	6.02721	1.15336	0.000449122	---	ENSRNOT00000091691
17733318	3.96944	4.57888	1.15353	0.0381093	LOC103694325	XR_597247
17816064	6.61579	7.63286	1.15373	0.0137197	---	ENSRNOT00000082764
17866724	4.20372	4.85018	1.15378	0.0449556	Pdcd1	NM_001106927
17818965	7.39205	8.52958	1.15389	0.00527073	---	ENSRNOT00000088162
17665319	5.23195	6.03871	1.1542	0.00241819	---	ENSRNOT00000091706
17845815	4.65784	5.37924	1.15488	0.014934	Mir628	NR_032749
17855074	3.35094	3.87025	1.15497	0.00640212	---	ENSRNOT00000087708
17606871	4.3744	5.05495	1.15557	0.0430221	---	---
17709647	4.775	5.51803	1.15561	0.0352776	Cacna2d3	NM_175595
17725192	4.34702	5.02456	1.15586	0.00330835	---	ENSRNOT00000069481
17710346	7.12033	8.23104	1.15599	0.00994849	---	ENSRNOT00000078472
17603699	4.65436	5.38186	1.15631	0.0463507	---	---
17825553	5.426	6.27412	1.15631	0.0397496	Mip	NM_001105719
17792222	5.62371	6.50404	1.15654	0.000601367	Ptcd3	ENSRNOT00000078991
17759530	4.70564	5.44267	1.15663	0.0345833	---	NONRATT006658
17851627	4.49146	5.20192	1.15818	0.0286221	Pou2f3	NM_001105745
17874161	5.53048	6.40807	1.15868	0.0165963	Rnf128	NM_001173349
17673385	9.12401	10.576	1.15914	0.00720974	---	ENSRNOT00000083071
17689697	4.6713	5.4152	1.15925	0.0390595	---	ENSRNOT00000086201
17725726	3.74301	4.34008	1.15952	0.010237	Dnd1	NM_001109379
17751632	4.00561	4.64466	1.15954	0.0398382	RGD1309170	NM_001134579
17608799	4.58027	5.31125	1.15959	0.0315657	---	---
17822869	6.68897	7.75669	1.15962	0.0227564	---	---
17602291	4.85882	5.63545	1.15984	0.0452939	---	---
17658370	4.30195	4.99274	1.16058	0.0286709	Slc13a5	NM_170668
17635940	4.0119	4.66039	1.16164	0.022447	Cyb5r2	NM_001014244
17602785	4.46416	5.18589	1.16167	0.044114	---	---
17764480	7.27953	8.4566	1.1617	0.0179312	---	ENSRNOT00000085457
17860243	7.27953	8.4566	1.1617	0.0179312	---	ENSRNOT00000085457
17816196	3.96296	4.6039	1.16173	0.00149237	---	GENSCAN00000034593
17606977	4.75572	5.52884	1.16257	0.0300646	---	---
17669332	3.22662	3.75121	1.16258	0.0463594	Stfa2l1	NM_001004129
17725568	6.2787	7.30139	1.16288	0.0221294	---	NONRATT026534
17709164	3.73782	4.34802	1.16325	0.00532398	---	GENSCAN00000047943
17607389	4.00466	4.66038	1.16374	0.0401555	---	---
17668766	3.46299	4.03238	1.16442	0.0216399	Retnla	NM_053333
17763560	4.07551	4.74581	1.16447	0.0210623	Aplnr	NM_031349
17690143	3.51692	4.0956	1.16454	0.0492527	Sel1l3	XM_006251033
17602677	4.32566	5.0404	1.16523	0.0365308	---	---
17772305	4.33405	5.05217	1.16569	0.0438573	Cacnb4	NM_001105733
17681825	8.30593	9.69051	1.1667	0.0213707	Fcgr3a	NM_207603
17602311	4.69247	5.4758	1.16693	0.0133372	---	---
17870751	3.45344	4.03248	1.16767	0.00249794	---	GENSCAN00000032848
17602901	4.80057	5.60926	1.16846	0.0301926	---	---
17844664	3.54254	4.14188	1.16918	0.039245	Hcn4	NM_021658
17643099	3.45994	4.04669	1.16958	0.0274028	LOC681006	XM_002728900
17604121	4.21763	4.93389	1.16983	0.0436825	---	---
17689943	4.68193	5.47798	1.17003	0.0410913	Tlr10	NM_001146035
17607005	4.43124	5.186	1.17033	0.00671729	---	---
17712905	3.47988	4.07551	1.17116	0.00517984	LOC688801	XR_146347
17873757	5.253	6.15215	1.17117	0.0209825	---	ENSRNOT00000085780
17602131	4.03324	4.72456	1.17141	0.0127147	---	---
17678148	7.49617	8.78266	1.17162	0.000252939	---	ENSRNOT00000087390
17605923	4.28483	5.02512	1.17277	0.0451342	---	---
17825141	6.30797	7.40231	1.17348	0.0185663	---	ENSRNOT00000051410
17735293	5.17807	6.0782	1.17383	0.0433116	---	ENSRNOT00000069461
17671538	5.90456	6.93665	1.1748	0.00663556	---	ENSRNOT00000052581
17601663	4.39106	5.15868	1.17481	0.0431325	---	---
17793995	6.58479	7.73989	1.17542	0.00107456	---	ENSRNOT00000079576
17825181	6.58479	7.73989	1.17542	0.00107456	---	ENSRNOT00000079576
17866175	5.55546	6.53021	1.17546	0.00503634	---	ENSRNOT00000080697
17692576	7.23105	8.50041	1.17554	0.00331177	---	ENSRNOT00000085510
17604113	5.23931	6.15958	1.17565	0.0146796	---	---
17608415	4.53664	5.33726	1.17648	0.00707851	---	---
17608695	4.71857	5.5521	1.17665	0.0242124	---	---
17882609	3.88218	4.57066	1.17734	0.0148868	---	XM_008764895
17713258	5.74104	6.76469	1.17831	0.0243386	Tnfsf13b	NM_001109112
17635186	7.26361	8.56357	1.17897	0.0168561	---	ENSRNOT00000085357
17661171	4.3354	5.11158	1.17903	0.0172471	LOC102554371	XM_006220838
17758543	4.51688	5.32908	1.17981	0.0192171	RGD1305587	ENSRNOT00000000662
17823969	3.20856	3.78553	1.17982	0.0186653	---	ENSRNOT00000069093
17790823	3.80276	4.48717	1.17998	0.0220824	Dennd2a	XM_006224879
17603723	4.46495	5.26919	1.18012	0.0414666	---	---
17603383	4.50035	5.3135	1.18069	0.0211674	---	---
17600325	4.4327	5.23439	1.18086	0.0132567	---	---
17665753	6.55229	7.74524	1.18207	0.00133458	---	ENSRNOT00000084982
17692574	7.15696	8.46276	1.18245	0.0058438	---	ENSRNOT00000082867
17603849	4.09964	4.84991	1.18301	0.0474528	---	---
17605821	4.19566	4.96889	1.18429	0.0391349	---	---
17785934	3.46413	4.10316	1.18447	0.0358426	---	ENSRNOT00000086023
17774100	7.82822	9.27631	1.18498	0.000614271	---	ENSRNOT00000077267
17607461	3.89853	4.62098	1.18531	0.0354235	---	---
17605279	4.00082	4.74335	1.1856	0.0235132	---	---
17666582	3.78908	4.49308	1.1858	0.00845256	Sst	NM_012659
17648841	3.92103	4.65092	1.18615	0.031433	Foxn1	NM_001100648
17857704	3.82729	4.54081	1.18643	0.019922	---	ENSRNOT00000084647
17809650	6.52843	7.74722	1.18669	0.00560324	---	ENSRNOT00000086480
17619916	4.49107	5.33348	1.18758	0.00942306	---	---
17882549	3.51873	4.18174	1.18842	0.0309268	---	XM_008758216
17684772	3.90786	4.64538	1.18873	0.0291142	RGD1566099	NM_001108347
17605647	4.26619	5.07954	1.19065	0.0238488	---	---
17783745	4.1986	4.99967	1.19079	0.0250724	Fam188b	XM_001058587
17600587	4.15624	4.95399	1.19194	0.0260586	---	---
17610101	4.15624	4.95399	1.19194	0.0260586	---	---
17781469	3.34436	3.9887	1.19266	0.0234578	Asb4	NM_001024318
17683259	5.26364	6.29628	1.19618	0.0428042	---	ENSRNOT00000087158
17778973	5.26364	6.29926	1.19675	0.00477403	---	ENSRNOT00000084801
17647798	4.11574	4.9258	1.19682	0.0185041	Gltpd2	NM_001115030
17609483	4.26682	5.10661	1.19682	0.0360664	---	---
17657789	8.28301	9.91675	1.19724	0.00156016	---	ENSRNOT00000079842
17709281	4.08073	4.88959	1.19822	0.003517	---	ENSRNOT00000057740
17863710	3.8375	4.60146	1.19908	0.0295898	---	ENSRNOT00000089558
17623679	9.38824	11.2635	1.19974	0.00061816	---	ENSRNOT00000088786
17614865	6.49177	7.78873	1.19979	0.00318967	---	ENSRNOT00000080795
17749842	3.62976	4.3555	1.19994	0.0440285	---	GENSCAN00000051735
17609493	3.98594	4.78588	1.20069	0.0334574	---	---
17801861	9.31516	11.1894	1.2012	0.00132976	---	ENSRNOT00000088888
17761410	5.33235	6.40917	1.20194	0.0134216	---	ENSRNOT00000078591
17761412	5.33235	6.40917	1.20194	0.0134216	---	ENSRNOT00000086225
17611079	3.40459	4.09348	1.20234	0.00666123	Eya4	NM_001271317
17848894	6.5733	7.93991	1.2079	0.00098126	---	ENSRNOT00000083758
17755554	6.53304	7.89447	1.20839	0.0193237	---	ENSRNOT00000079074
17609591	4.31649	5.21767	1.20877	0.0289627	---	---
17710187	6.1571	7.44665	1.20944	0.000953185	---	ENSRNOT00000081926
17881921	3.62796	4.39404	1.21116	0.0472873	---	XM_001057922
17858292	3.60368	4.36721	1.21188	0.0200445	Prss39	NM_001013226
17766248	6.2924	7.63006	1.21258	0.000449864	---	ENSRNOT00000082756
17604307	4.6924	5.6937	1.21339	0.0221906	---	---
17607079	3.17591	3.85459	1.2137	0.049645	---	---
17877689	2.86779	3.4843	1.21498	0.0376943	---	ENSRNOT00000082581
17600299	4.20118	5.11008	1.21634	0.000744041	---	---
17624899	4.37098	5.31869	1.21682	0.0117897	Pdcd1lg2	NM_001107582
17601789	3.38371	4.12238	1.2183	0.0214412	---	---
17827629	3.29609	4.0157	1.21832	0.0154827	Ntn4	NM_001106780
17801863	7.78596	9.48925	1.21876	0.00410247	---	ENSRNOT00000083798
17668828	5.63697	6.87122	1.21896	0.0208788	---	---
17759143	7.36099	8.98181	1.22019	0.00023685	---	ENSRNOT00000091170
17870607	7.36099	8.98181	1.22019	0.00023685	---	ENSRNOT00000083166
17803755	6.79976	8.31195	1.22239	0.00200272	---	ENSRNOT00000080569
17612399	5.54454	6.78271	1.22331	0.0379497	Fpr3	XM_001058175
17835135	8.20435	10.0388	1.2236	0.000396092	---	ENSRNOT00000080363
17726656	3.4616	4.24051	1.22501	0.0317729	---	ENSRNOT00000088527
17765469	4.77053	5.85348	1.22701	0.00264659	---	ENSRNOT00000079001
17796700	3.38697	4.15959	1.22812	0.0121051	LOC100912291	XR_346305
17688794	5.33014	6.55133	1.22911	0.00289742	---	ENSRNOT00000090415
17624216	4.69841	5.78484	1.23124	0.0355581	---	ENSRNOT00000080847
17608709	4.22177	5.19901	1.23148	0.0197825	---	---
17755135	2.84719	3.50837	1.23222	0.0454114	---	---
17638660	3.59428	4.42944	1.23236	0.00304111	Ascl2	NM_031503
17829493	3.58597	4.42085	1.23282	0.00628545	---	ENSRNOT00000054629
17883003	3.58597	4.42085	1.23282	0.00628545	---	ENSRNOT00000054629
17751177	5.39366	6.65196	1.23329	0.00208017	---	ENSRNOT00000084360
17743875	3.35606	4.14532	1.23517	0.016624	---	ENSRNOT00000090582
17608811	4.36189	5.39178	1.23611	0.00890453	---	---
17605475	4.03917	4.99727	1.2372	0.011169	---	---
17602873	4.11747	5.09726	1.23796	5.21236e-05	---	---
17605823	4.54784	5.63017	1.23799	0.000147324	---	---
17722258	6.5263	8.08511	1.23885	0.0100253	---	ENSRNOT00000078524
17729142	2.65905	3.29419	1.23886	0.0452739	---	NONRATT027367
17619502	8.43166	10.4775	1.24264	0.00156678	---	ENSRNOT00000087551
17673023	4.59784	5.71525	1.24303	0.0166848	---	ENSRNOT00000085456
17605587	3.72787	4.64485	1.24598	0.0270635	---	---
17605795	3.91966	4.88659	1.24669	0.00383812	---	---
17675682	3.14567	3.92272	1.24702	0.0395282	---	ENSRNOT00000086197
17605689	4.14172	5.16931	1.24811	0.0485532	---	---
17787247	6.2751	7.83338	1.24833	0.0074319	---	ENSRNOT00000081653
17705115	3.64185	4.54698	1.24854	0.0180464	---	ENSRNOT00000080889
17806671	3.18943	3.9888	1.25063	0.0331925	LOC100360779	XM_008763649
17609883	3.65473	4.57217	1.25103	0.0102717	---	---
17605455	4.38851	5.49101	1.25122	0.0102272	---	---
17809652	7.91303	9.90697	1.25198	0.000288594	---	ENSRNOT00000082779
17605933	3.31851	4.16303	1.25449	0.0338739	---	---
17875897	2.3146	2.91627	1.25994	0.0138249	---	ENSRNOT00000054673
17608131	3.24749	4.0961	1.26131	0.0417903	---	---
17602907	3.2895	4.15027	1.26167	0.0325063	---	---
17675697	7.40362	9.34936	1.26281	0.00158536	---	ENSRNOT00000081251
17609255	3.42848	4.33128	1.26332	0.032925	---	---
17603879	3.76428	4.76318	1.26536	0.0431489	---	---
17609383	4.86394	6.15673	1.26579	0.00216173	---	---
17605113	3.81901	4.83521	1.26609	0.0266824	---	---
17678168	3.21174	4.06858	1.26678	0.00332279	Oas1f	NM_001009490
17644404	3.31778	4.20661	1.2679	0.0162041	Igfals	ENSRNOT00000020233
17755886	3.92062	4.97199	1.26816	0.00431525	---	ENSRNOT00000069704
17602657	3.76012	4.77189	1.26908	0.0162194	---	---
17727949	5.19343	6.5995	1.27074	0.00053042	---	ENSRNOT00000087539
17608255	4.15809	5.28876	1.27192	0.0382309	---	---
17727794	7.65551	9.74073	1.27238	8.58462e-05	---	ENSRNOT00000080595
17773349	2.68813	3.42724	1.27495	0.0244454	---	ENSRNOT00000086887
17660657	7.70898	9.83878	1.27627	0.000323694	---	ENSRNOT00000087314
17609869	3.299	4.21943	1.279	0.000357427	---	---
17602609	4.03196	5.15722	1.27908	0.00397205	---	---
17871315	2.5945	3.32431	1.28129	0.0470305	---	GENSCAN00000024625
17607287	3.66128	4.69433	1.28215	0.0311573	---	---
17607227	3.36955	4.32432	1.28335	0.0349133	---	---
17647364	5.30953	6.83263	1.28686	0.00219904	---	ENSRNOT00000083120
17608693	4.14115	5.33087	1.28729	0.0271392	---	---
17607965	3.71754	4.78793	1.28793	0.0280671	---	---
17608269	4.54941	5.86286	1.28871	0.0065405	---	---
17837576	3.05174	3.93472	1.28934	0.0391006	LOC690120	NR_131067
17603077	3.50295	4.51998	1.29034	0.0246149	---	---
17757282	3.32798	4.29775	1.2914	0.0113924	---	ENSRNOT00000089280
17795659	4.00729	5.18241	1.29324	0.0348799	Ly49s7	NM_001009494
17696200	5.88964	7.62011	1.29382	0.000329184	---	ENSRNOT00000092149
17802783	2.69418	3.48846	1.29481	0.024713	---	NONRATT045616
17747682	3.32804	4.34099	1.30437	0.00714638	---	ENSRNOT00000083113
17802806	4.89746	6.38907	1.30457	0.00525127	---	ENSRNOT00000087842
17600911	3.73973	4.88344	1.30583	0.0454629	---	---
17601231	3.73973	4.88344	1.30583	0.0454629	---	---
17846438	2.77163	3.62391	1.3075	0.0387622	---	ENSRNOT00000079206
17674969	3.63351	4.77037	1.31288	0.0174226	---	---
17793044	6.1943	8.14089	1.31426	0.00418795	Tcp1-ps1	XR_592190
17605177	3.15596	4.15135	1.3154	0.0160156	---	---
17692578	4.75939	6.26416	1.31617	0.0223623	---	ENSRNOT00000078554
17732273	3.04689	4.02147	1.31986	0.035302	---	---
17795684	5.28256	6.98675	1.32261	0.015498	Ly49i7	NM_001009500
17606177	3.51429	4.66208	1.32661	0.0147102	---	---
17604967	4.70381	6.24498	1.32764	0.0406061	---	---
17822901	4.19821	5.58748	1.33092	0.0461047	---	---
17691637	3.5488	4.7552	1.33995	0.0227909	---	---
17641178	3.8621	5.17795	1.34071	0.0131149	---	ENSRNOT00000078242
17730371	4.01367	5.40431	1.34648	0.0351655	Vat1l	XM_003751883
17836105	2.74965	3.71672	1.35171	0.0470966	LOC100362798	ENSRNOT00000034088
17862492	2.89285	3.91358	1.35285	0.00851412	---	ENSRNOT00000080225
17816217	2.52919	3.4336	1.35759	0.0493388	---	---
17605597	3.80427	5.17635	1.36067	0.00484859	---	---
17738823	2.53455	3.45195	1.36196	0.0305231	Arhgef26	XM_001063458
17649604	3.60835	4.93771	1.36841	0.0138092	Ccl4	NM_053858
17840408	2.24894	3.08623	1.3723	0.0206739	---	ENSRNOT00000082993
17603845	2.72567	3.7513	1.37629	0.013043	---	---
17796679	3.29167	4.53753	1.37849	0.0257132	---	---
17603305	3.19645	4.42254	1.38358	0.00565601	---	---
17674311	3.87766	5.3831	1.38823	0.0440393	---	---
17795674	4.53527	6.29979	1.38907	0.00259049	Klra5	XM_008763341
17606227	3.8455	5.36033	1.39392	0.00413748	---	---
17610007	3.33979	4.69042	1.4044	0.017256	---	---
17603551	2.58902	3.63689	1.40474	0.0177105	---	---
17600899	3.4234	4.82725	1.41007	0.0230845	---	---
17601219	3.4234	4.82725	1.41007	0.0230845	---	---
17774274	2.82285	3.99062	1.41369	0.0402495	---	NM_001000638
17803003	2.52692	3.62631	1.43507	0.0171663	Ifnlr1	NM_001191868
17718463	2.92821	4.20288	1.43531	0.0452963	---	ENSRNOT00000071112
17652949	2.42011	3.51451	1.45221	0.0202388	---	ENSRNOT00000084995
17762108	2.81999	4.09653	1.45268	0.0157549	Lypd6	XM_001053512
17604533	2.45821	3.57835	1.45568	0.0207683	---	---
17879490	1.84254	2.68488	1.45716	0.0470563	RGD1566008	XM_006257584
17600181	3.06432	4.5138	1.47302	0.0027158	---	---
17603983	2.90225	4.3724	1.50656	0.00722733	---	---
17602867	2.583	3.90527	1.51191	0.0348377	---	---
17851973	3.33896	5.06118	1.5158	0.000509053	---	ENSRNOT00000079343
17602159	1.97987	3.02511	1.52793	0.0495371	---	---
17605549	2.5874	3.98161	1.53885	0.0183718	---	---
17604905	2.90259	4.48622	1.54559	0.016129	---	---
17609265	2.9053	4.49173	1.54604	0.000253239	---	---
17700702	2.37566	3.67719	1.54786	0.00348444	---	ENSRNOT00000063238
17612350	1.92418	2.99297	1.55545	0.0061788	---	ENSRNOT00000081154
17859862	4.42935	6.92785	1.56408	0.0032573	---	ENSRNOT00000091608
17608209	2.07246	3.24439	1.56548	0.0339976	---	---
17603019	2.4369	3.89264	1.59737	0.0402659	---	---
17601919	2.93927	4.73146	1.60974	0.0293955	---	---
17606303	2.20769	3.55759	1.61145	0.0209759	---	---
17763461	3.0727	4.96869	1.61704	0.00100011	Mir3590	NR_037388
17692790	2.16769	3.52032	1.624	0.0472248	---	NONRATT019077
17607699	2.63991	4.37018	1.65543	0.00227891	---	---
17609117	2.63991	4.37018	1.65543	0.00227891	---	---
17607505	2.4307	4.05838	1.66964	0.0196343	---	---
17608923	2.4307	4.05838	1.66964	0.0196343	---	---
17607527	2.45144	4.16389	1.69855	0.0320685	---	---
17608945	2.45144	4.16389	1.69855	0.0320685	---	---
17762604	1.89439	3.25242	1.71687	0.00326864	---	ENSRNOT00000069354
17755673	0.806246	1.41502	1.75508	0.0154364	---	ENSRNOT00000069395
17601753	2.24744	4.00751	1.78314	0.0250557	---	---
17601935	1.96688	3.51966	1.78946	0.0243516	---	---
17843745	2.17561	4.07107	1.87123	0.0133732	---	ENSRNOT00000052626
17604063	1.87744	3.65358	1.94605	0.0233034	---	---
17661197	1.37273	2.80403	2.04267	0.0121908	Krt31	NM_001008817
17608565	1.40507	2.9121	2.07257	0.047426	---	---
17670276	1.04825	2.5546	2.43702	0.00632943	---	ENSRNOT00000084380
17605441	1.03429	2.62646	2.53939	0.00492237	---	---
17839752	0.689227	1.75323	2.54377	0.0429798	---	---
17883017	0.689227	1.75323	2.54377	0.0429798	---	---
17807212	1.00805	2.58485	2.56421	0.005987	Acnat1	XM_006225295
17847381	1.22238	3.13762	2.5668	0.0286636	---	ENSRNOT00000088789
17607185	1.09866	2.92468	2.66204	0.0383767	---	---
17600925	1.07128	2.88227	2.6905	0.0329509	---	---
17601245	1.07128	2.88227	2.6905	0.0329509	---	---
17601259	1.07128	2.88227	2.6905	0.0329509	---	---
17609553	1.47233	4.0684	2.76325	0.0146149	---	---
17605083	1.37635	3.85474	2.80069	0.00173771	---	---
17605389	1.07727	3.78048	3.5093	0.00907127	---	---
17600375	0.456517	3.10356	6.79834	0.0356041	---	---
17694639	0.236554	1.77631	7.5091	0.0326169	---	ENSRNOT00000088249
17879352	0.144544	1.21627	8.41453	0.0340901	Mir450a1	NR_031951
17711913	0.174809	1.69401	9.69068	0.00338813	---	ENSRNOT00000085656
17606905	0.102718	2.08733	20.3209	0.0103749	---	---

## Sheet: female male BPA overlap
Probe_ID	Gene Symbol	Male Control, MC (avg exp)	Male BPA, mBPA(0.5+50) (avg exp)	mBPA(0.5+50) vs MC (adj p-value)	mBPA(0.5+50) vs MC (fold change)	Female BPA, fBPA(0.5+50) vs FC (fold change)	Female Control, FC (avg exp)	fBPA(0.5+50) (avg exp)	fBPA(0.5+50) vs FC (adj p-value)
17800491	---	3.48408	2.47174	0.0461757	-1.40957	-1.36235	3.32479	2.44049	0.00859862
17879490	RGD1566008	1.84254	2.68488	0.0470563	1.45716	-1.28853	2.91289	2.26062	0.0422131
17609949	---	5.11196	4.57328	0.0484836	-1.11779	-1.12742	5.19179	4.60502	0.0393849
17860813	Nyap2	4.92744	4.62601	0.0345607	-1.06516	-1.11608	5.16034	4.62363	0.0303274
17675050	Map2k7	4.61371	3.9847	0.00258121	-1.15786	-1.11169	5.10452	4.59167	0.00918791
17829493	---	3.58597	4.42085	0.00628545	1.23282	-1.10394	4.66983	4.23016	0.0366501
17883003	---	3.58597	4.42085	0.00628545	1.23282	-1.10394	4.66983	4.23016	0.0366501
17808188	Tle1	4.84543	5.17807	0.0275727	1.06865	-1.07679	5.71022	5.30298	0.0247997
17704825	Pcdh20	6.00743	6.28776	0.0474061	1.04666	-1.07495	6.54997	6.09325	0.0342809
17878760	LOC102555917	5.74928	6.37529	0.0312996	1.10888	-1.06883	6.6328	6.20566	0.0324171
17839665	RGD1566029	4.01404	4.5821	0.0174105	1.14152	-1.06881	4.80992	4.50027	0.00401285
17718771	Phactr1	5.71957	6.23793	0.00379598	1.09063	-1.06648	6.6208	6.20807	0.048398
17760196	LOC681186	5.02882	5.36649	0.0361525	1.06715	-1.06562	5.59381	5.24934	0.0151252
17630489	Tex101	4.935	4.29984	0.0205479	-1.14772	-1.06528	4.81522	4.52015	0.00601053
17845789	Dyx1c1	5.40692	5.03511	0.0116469	-1.07384	-1.06056	5.66834	5.34467	0.0125395
17698315	---	6.00082	6.47916	0.0427516	1.07971	-1.05759	6.56572	6.20816	0.0195001
17838798	Lrrc24	5.1175	4.70963	0.0299166	-1.0866	-1.0564	5.33535	5.0505	0.0220335
17782860	Trbv13-2	5.24432	5.75419	0.0195858	1.09722	-1.05632	6.40486	6.06336	0.0482531
17682317	Kmo	5.73918	6.25805	0.0293247	1.09041	-1.05582	6.49785	6.15432	0.0360871
17714873	Ptpdc1	5.33373	5.82772	0.0414398	1.09262	-1.05489	6.27957	5.9528	0.0403009
17644009	Nlrc3	6.18589	6.77489	0.0233077	1.09522	-1.05485	7.07344	6.70565	0.01843
17603743	---	5.2115	5.87602	0.0370831	1.12751	-1.05403	6.02129	5.71263	0.0241671
17703427	---	4.37857	4.85879	0.00670725	1.10968	-1.05176	4.92062	4.67845	0.0104007
17731446	Mmp15	5.50173	5.93661	0.0228726	1.07904	-1.05161	6.00781	5.71297	0.0342821
17695991	---	6.19115	6.6446	0.00279984	1.07324	-1.04885	6.92144	6.59908	0.0214804
17802139	Col8a2	6.66996	7.21517	0.0205555	1.08174	-1.04762	7.42761	7.08996	0.0460065
17789285	---	6.56725	7.02273	0.00497145	1.06936	-1.04567	7.20545	6.89074	0.00993935
17765071	Dll4	6.45096	6.95917	0.0478648	1.07878	-1.04468	7.04831	6.74685	0.0354277
17627742	Taar7e	7.21546	6.8482	0.0166178	-1.05363	-1.04007	7.27614	6.99583	0.0373969
17663879	Mir338	5.5713	5.94487	0.0389997	1.06705	-1.03932	5.89754	5.67442	0.0344943
17859645	---	10.6878	11.4793	0.00733397	1.07406	1.05436	10.518	11.0897	0.040934
17624523	---	9.76764	10.5732	0.0132672	1.08247	1.05455	9.73123	10.2621	0.0354719
17736690	---	9.76764	10.5732	0.0132672	1.08247	1.05455	9.73123	10.2621	0.0354719
17739042	---	9.76764	10.5732	0.0132672	1.08247	1.05455	9.73123	10.2621	0.0354719
17839395	LOC102549144	9.76764	10.5732	0.0132672	1.08247	1.05455	9.73123	10.2621	0.0354719
17856988	---	9.76764	10.5732	0.0132672	1.08247	1.05455	9.73123	10.2621	0.0354719
17789808	---	10.1558	10.9888	0.00857159	1.08202	1.05462	10.0956	10.647	0.0252871
17872257	---	10.3474	11.1633	0.00638823	1.07886	1.06001	10.0881	10.6934	0.0279709
17874930	---	9.58404	10.3571	0.0184369	1.08067	1.0643	9.27923	9.87592	0.0356033
17746435	---	9.08412	9.86222	0.0142487	1.08565	1.06553	9.03246	9.62439	0.0286058
17611073	---	8.02395	9.10771	0.0011399	1.13507	1.06597	8.27474	8.82059	0.0349189
17793995	---	6.58479	7.73989	0.00107456	1.17542	1.06792	6.98446	7.45886	0.025737
17825181	---	6.58479	7.73989	0.00107456	1.17542	1.06792	6.98446	7.45886	0.025737
17848896	---	9.10978	10.0852	0.0141592	1.10708	1.06813	9.02292	9.63768	0.0399279
17840724	---	5.96753	6.8005	0.00624317	1.13958	1.07011	6.3408	6.78536	0.00273408
17760451	---	7.04899	7.74814	0.0139429	1.09918	1.0711	7.16662	7.67616	0.0423703
17683592	---	9.94146	11.0498	0.00850988	1.11149	1.07468	9.5202	10.2312	0.0344048
17674844	---	8.2909	9.49927	0.017361	1.14575	1.07763	8.41444	9.06763	0.042077
17843424	Zfp202	5.27261	5.76751	0.0454058	1.09386	1.0784	5.47267	5.90171	0.000439829
17818965	---	7.39205	8.52958	0.00527073	1.15389	1.08152	7.60467	8.22463	0.0411464
17774100	---	7.82822	9.27631	0.000614271	1.18498	1.08409	8.19903	8.88847	0.0436706
17670118	---	8.99423	9.82115	0.0280598	1.09194	1.08444	8.60107	9.32737	0.0310555
17791155	---	8.93357	9.735	0.0387726	1.08971	1.08548	8.77852	9.52889	0.0308634
17674327	---	6.06046	6.86437	0.0450615	1.13265	1.0868	6.1425	6.67566	0.0472783
17609483	---	4.26682	5.10661	0.0360664	1.19682	1.09027	4.3527	4.74564	0.0454869
17839737	---	7.32968	8.24227	0.0248985	1.12451	1.09066	7.12727	7.77346	0.035646
17710187	---	6.1571	7.44665	0.000953185	1.20944	1.09099	6.52351	7.11708	0.0423451
17622674	---	5.42886	6.09732	0.0497901	1.12313	1.09211	5.32753	5.81827	0.0433712
17676538	Mir25	4.61036	4.02719	0.0215233	-1.14481	1.09707	4.01501	4.40475	0.0123136
17801861	---	9.31516	11.1894	0.00132976	1.2012	1.09947	9.62782	10.5855	0.0316455
17831177	---	6.50055	7.37788	0.0354779	1.13496	1.10416	6.39111	7.0568	0.0172518
17844970	---	6.50055	7.37788	0.0354779	1.13496	1.10416	6.39111	7.0568	0.0172518
17692574	---	7.15696	8.46276	0.0058438	1.18245	1.10458	7.38584	8.15822	0.0105552
17602687	---	4.5459	3.87047	0.0405673	-1.17451	1.10501	4.26746	4.71558	0.0208004
17692576	---	7.23105	8.50041	0.00331177	1.17554	1.1057	7.40675	8.18967	0.0117572
17619502	---	8.43166	10.4775	0.00156678	1.24264	1.1073	9.07412	10.0478	0.0365155
17751221	---	7.43347	8.55073	0.0123653	1.1503	1.11276	7.5489	8.40009	0.0332787
17725568	---	6.2787	7.30139	0.0221294	1.16288	1.11366	6.14356	6.84185	0.0241106
17722258	---	6.5263	8.08511	0.0100253	1.23885	1.11585	6.3391	7.07348	0.021365
17797445	Cngb3	5.04572	4.59478	0.0164928	-1.09814	1.11588	4.12636	4.60453	0.047671
17817269	Papln	4.69399	5.0941	0.0439641	1.08524	1.12484	4.4179	4.96945	0.00581887
17873757	---	5.253	6.15215	0.0209825	1.17117	1.12654	5.33216	6.0069	0.016241
17801863	---	7.78596	9.48925	0.00410247	1.21876	1.12835	7.916	8.932	0.0161133
17604993	---	4.55001	5.06149	0.023911	1.11241	1.12935	4.1879	4.72958	0.0427032
17881048	RGD1566387	4.42613	3.71639	0.00728854	-1.19098	1.13385	3.80393	4.31308	0.0471876
17636806	---	4.95148	5.64076	0.0401313	1.13921	1.13518	4.75191	5.39429	0.0273151
17765469	---	4.77053	5.85348	0.00264659	1.22701	1.13974	4.95685	5.6495	0.0343074
17764480	---	7.27953	8.4566	0.0179312	1.1617	1.14271	7.12546	8.14234	0.0377913
17860243	---	7.27953	8.4566	0.0179312	1.1617	1.14271	7.12546	8.14234	0.0377913
17757282	---	3.32798	4.29775	0.0113924	1.2914	1.14358	3.38378	3.86963	0.0264095
17675697	---	7.40362	9.34936	0.00158536	1.26281	1.14397	7.89173	9.02787	0.0401511
17624216	---	4.69841	5.78484	0.0355581	1.23124	1.16554	5.02972	5.86236	0.0224152
17863710	---	3.8375	4.60146	0.0295898	1.19908	1.16587	3.83034	4.4657	0.0109061
17668828	---	5.63697	6.87122	0.0208788	1.21896	1.1741	5.32435	6.25131	0.016211
17633381	---	4.59402	3.85207	0.0478331	-1.19261	1.18041	3.78233	4.46469	0.00663134
17703186	Gzmf	3.48248	2.76527	0.0393443	-1.25936	1.18206	2.94321	3.47905	0.0350545
17824346	Mir3592	4.32474	3.70051	0.04674	-1.16869	1.19675	3.14291	3.76127	0.0410387
17836105	LOC100362798	2.74965	3.71672	0.0470966	1.35171	1.21119	3.12636	3.7866	0.0262565
17802718	Trnp1	4.04047	3.1054	0.0452252	-1.30111	1.21369	2.60468	3.16129	0.0224257
17877689	---	2.86779	3.4843	0.0376943	1.21498	1.23222	2.66282	3.28118	0.048841
17671409	---	3.5512	2.66618	0.021792	-1.33194	1.2756	2.38038	3.03642	0.0273598
17728627	Best2	3.87075	3.44219	0.0469747	-1.1245	1.28094	2.91618	3.73546	0.0348278
17862492	---	2.89285	3.91358	0.00851412	1.35285	1.31009	2.76689	3.62488	0.0405573
17652674	---	2.1791	0.995466	0.0108012	-2.18903	1.95686	0.572302	1.11991	0.0291681

## Sheet: Female BPA(0.5+50) masculinizat
Probe_ID	Female Control, FC (avg exp)	fBPA(0.5+50) (avg exp)	Male Control, MC (avg exp)	Female BPA, fBPA(0.5+50)-MC	fBPA(0.5+50)-MC (absolute value)	Column, J-F (283st closer to M)	FC-MC	fBPA(0.5+50)-FC	fBPA(0.5+50)-FC (absolute value)
17608563	4.74483	3.34647	3.80326	-0.456797	0.456797	0.94157	0.94157	-1.39837	1.39837
17723667	3.70524	2.47391	1.86506	0.608848	0.608848	0.622483	1.84018	-1.23133	1.23133	upregulation
17824855	8.30674	7.14408	6.67388	0.470204	0.470204	0.692457	1.63286	-1.16266	1.16266	downregulation
17604799	4.17888	3.02891	2.76836	0.260551	0.260551	0.889424	1.41053	-1.14998	1.14998
17832370	5.82845	4.76781	5.0427	-0.27489	0.27489	0.785747	0.785747	-1.06064	1.06064
17724855	3.25048	2.23201	2.06538	0.166623	0.166623	0.851848	1.18509	-1.01847	1.01847
17843235	3.71974	2.73545	2.82753	-0.092074	0.092074	0.892209	0.892209	-0.984283	0.984283
17602405	4.90171	3.96461	3.74284	0.221773	0.221773	0.71533	1.15887	-0.937102	0.937102
17791912	2.61137	1.73122	1.54424	0.186976	0.186976	0.69318	1.06713	-0.880156	0.880156
17702253	7.49068	6.61497	6.49741	0.11756	0.11756	0.758153	0.993272	-0.875712	0.875712
17654396	4.91473	4.06687	4.17081	-0.103946	0.103946	0.743916	0.743916	-0.847862	0.847862
17766023	4.69289	3.84875	4.07985	-0.231101	0.231101	0.613043	0.613043	-0.844145	0.844145
17612974	4.28027	3.45608	3.55864	-0.102556	0.102556	0.721626	0.721626	-0.824182	0.824182
17699417	4.10019	3.29489	3.11973	0.175162	0.175162	0.630139	0.980463	-0.805301	0.805301
17794815	5.56527	4.76539	4.39744	0.367944	0.367944	0.431939	1.16783	-0.799884	0.799884
17600391	5.23881	4.45077	4.1837	0.267069	0.267069	0.520974	1.05511	-0.788043	0.788043
17634523	4.96187	4.18811	3.91308	0.275029	0.275029	0.498737	1.0488	-0.773766	0.773766
17806938	4.07093	3.31195	3.54457	-0.232617	0.232617	0.526366	0.526366	-0.758983	0.758983
17609439	5.72047	4.96398	4.71369	0.250292	0.250292	0.506191	1.00677	-0.756483	0.756483
17602013	5.28563	4.53206	4.6113	-0.0792361	0.0792361	0.674336	0.674336	-0.753572	0.753572
17831711	5.7036	4.96099	5.13828	-0.177292	0.177292	0.565315	0.565315	-0.742607	0.742607
17873738	5.13744	4.40833	4.57502	-0.166687	0.166687	0.56242	0.56242	-0.729107	0.729107
17618059	4.98906	4.26968	4.4101	-0.140416	0.140416	0.578962	0.578962	-0.719378	0.719378
17882261	5.3677	4.65818	4.73662	-0.0784378	0.0784378	0.631078	0.631078	-0.709516	0.709516
17651595	4.62068	3.93243	3.36544	0.566988	0.566988	0.121263	1.25524	-0.688251	0.688251
17651028	6.73393	6.04675	5.93491	0.111846	0.111846	0.575328	0.799021	-0.687174	0.687174
17606007	5.08659	4.41576	4.20466	0.211106	0.211106	0.45972	0.881931	-0.670825	0.670825
17608227	4.84417	4.17403	4.27806	-0.10403	0.10403	0.566117	0.566117	-0.670147	0.670147
17813354	4.75471	4.08954	4.29264	-0.203099	0.203099	0.462066	0.462066	-0.665164	0.665164
17666510	4.05791	3.3962	3.22563	0.170578	0.170578	0.491133	0.832288	-0.66171	0.66171
17810194	5.25984	4.60426	4.38861	0.215643	0.215643	0.439944	0.871229	-0.655587	0.655587
17842699	5.38123	4.72836	3.94284	0.785516	0.785516	-0.132642	1.43839	-0.652873	0.652873
17879490	2.91289	2.26062	1.84254	0.418076	0.418076	0.234191	1.07034	-0.652267	0.652267
17782679	4.5973	3.94819	4.0065	-0.0583136	0.0583136	0.590799	0.590799	-0.649113	0.649113
17883708	3.58575	2.94279	3.01479	-0.0720029	0.0720029	0.570961	0.570961	-0.642964	0.642964
17764288	7.2563	6.62016	6.72535	-0.105185	0.105185	0.530952	0.530952	-0.636137	0.636137
17725991	5.55938	4.92352	4.88467	0.0388452	0.0388452	0.597018	0.674708	-0.635863	0.635863
17622566	4.78026	4.1452	3.78853	0.356665	0.356665	0.278401	0.991731	-0.635066	0.635066
17819850	3.6846	3.05112	2.95398	0.0971429	0.0971429	0.536337	0.730623	-0.63348	0.63348
17878161	6.04498	5.43029	5.23039	0.1999	0.1999	0.414795	0.814595	-0.614695	0.614695
17818407	4.3157	3.70817	2.59406	1.11411	1.11411	-0.506582	1.72164	-0.607527	0.607527
17633360	6.73765	6.1353	6.09884	0.0364588	0.0364588	0.565892	0.638809	-0.60235	0.60235
17664320	6.03761	5.4404	5.34828	0.0921169	0.0921169	0.505092	0.689326	-0.597209	0.597209
17633198	8.07642	7.48013	7.35026	0.129864	0.129864	0.466428	0.726157	-0.596292	0.596292
17646399	5.0374	4.44562	4.27275	0.172873	0.172873	0.418907	0.764652	-0.59178	0.59178
17629290	4.94189	4.3541	4.12423	0.229872	0.229872	0.357918	0.817661	-0.587789	0.587789
17814334	5.5433	4.9566	4.88969	0.0669164	0.0669164	0.519778	0.653611	-0.586695	0.586695
17604043	5.58058	5.00665	4.98293	0.023725	0.023725	0.550203	0.597653	-0.573928	0.573928
17878685	4.78827	4.2181	4.19742	0.0206816	0.0206816	0.549487	0.59085	-0.570169	0.570169
17881717	8.29727	7.72771	7.63081	0.0968995	0.0968995	0.472663	0.666462	-0.569563	0.569563
17609909	5.07962	4.51638	4.10202	0.414355	0.414355	0.148885	0.977595	-0.56324	0.56324
17881030	4.83046	4.26903	3.90313	0.365898	0.365898	0.195537	0.927333	-0.561435	0.561435
17609915	5.79148	5.23019	5.26083	-0.0306383	0.0306383	0.530653	0.530653	-0.561291	0.561291
17800635	6.27907	5.72221	5.63528	0.0869312	0.0869312	0.469932	0.643794	-0.556863	0.556863
17791329	5.30256	4.74687	4.96371	-0.216836	0.216836	0.338851	0.338851	-0.555686	0.555686
17606975	5.30661	4.7515	4.57776	0.173741	0.173741	0.381368	0.72885	-0.555109	0.555109
17601077	7.54699	6.99236	6.86834	0.124024	0.124024	0.430599	0.678647	-0.554623	0.554623
17601411	7.54699	6.99236	6.86834	0.124024	0.124024	0.430599	0.678647	-0.554623	0.554623
17715355	5.93752	5.38486	4.9121	0.472759	0.472759	0.0799015	1.02542	-0.552661	0.552661
17743049	4.50506	3.95415	3.51989	0.434254	0.434254	0.116653	0.985161	-0.550907	0.550907
17635080	6.83178	6.28325	6.00541	0.27784	0.27784	0.270689	0.826368	-0.548529	0.548529
17792808	4.41122	3.86461	3.51199	0.352613	0.352613	0.194002	0.899227	-0.546614	0.546614
17686990	4.29205	3.74693	3.81586	-0.0689305	0.0689305	0.476186	0.476186	-0.545116	0.545116
17877718	5.38148	4.84122	4.75847	0.082756	0.082756	0.457496	0.623008	-0.540252	0.540252
17601075	6.87759	6.33785	6.36936	-0.031511	0.031511	0.508228	0.508228	-0.539739	0.539739
17601409	6.87759	6.33785	6.36936	-0.031511	0.031511	0.508228	0.508228	-0.539739	0.539739
17602575	5.73678	5.19976	4.51538	0.684382	0.684382	-0.147368	1.2214	-0.537014	0.537014
17768497	5.17587	4.64486	4.45606	0.188797	0.188797	0.342215	0.719809	-0.531012	0.531012
17609935	6.0938	5.56282	4.90519	0.657635	0.657635	-0.126661	1.18861	-0.530974	0.530974
17778324	7.07748	6.55114	6.36569	0.185452	0.185452	0.340889	0.711793	-0.526341	0.526341
17603999	6.64389	6.1213	5.88625	0.235052	0.235052	0.287534	0.757639	-0.522586	0.522586
17813036	6.31163	5.78977	5.78157	0.00819633	0.00819633	0.513667	0.53006	-0.521863	0.521863
17874027	5.52338	5.01202	4.93777	0.0742577	0.0742577	0.437094	0.58561	-0.511352	0.511352
17881939	7.30052	6.79477	6.83395	-0.0391851	0.0391851	0.466561	0.466561	-0.505746	0.505746
17600327	6.29357	5.78849	5.54684	0.241648	0.241648	0.263435	0.746732	-0.505084	0.505084
17864988	6.09946	5.59532	5.52807	0.0672495	0.0672495	0.436891	0.57139	-0.504141	0.504141
17754673	8.03355	7.53831	7.31547	0.222835	0.222835	0.272405	0.718076	-0.49524	0.49524
17824656	6.12644	5.63146	5.49036	0.141099	0.141099	0.353885	0.636082	-0.494983	0.494983
17723019	5.17452	4.67971	4.15562	0.524086	0.524086	-0.0292717	1.0189	-0.494814	0.494814
17635729	3.26562	2.782	2.73066	0.0513416	0.0513416	0.432285	0.534968	-0.483627	0.483627
17603535	4.78702	4.30505	3.71207	0.592979	0.592979	-0.111011	1.07495	-0.481969	0.481969
17652017	4.86222	4.38074	4.21846	0.162279	0.162279	0.319202	0.643759	-0.48148	0.48148
17882831	5.56615	5.08496	4.96989	0.115069	0.115069	0.366121	0.596259	-0.48119	0.48119
17828407	5.90733	5.429	5.46178	-0.0327722	0.0327722	0.445553	0.445553	-0.478325	0.478325
17827966	4.98088	4.50374	4.04613	0.45761	0.45761	0.0195265	0.934746	-0.477136	0.477136
17607681	5.68198	5.20803	4.97068	0.237345	0.237345	0.236612	0.711301	-0.473957	0.473957
17609099	5.68198	5.20803	4.97068	0.237345	0.237345	0.236612	0.711301	-0.473957	0.473957
17657885	5.10519	4.63244	4.64465	-0.0122085	0.0122085	0.460541	0.460541	-0.472749	0.472749
17779078	5.04505	4.57475	4.33353	0.241221	0.241221	0.229082	0.711524	-0.470303	0.470303
17744450	7.33458	6.86547	6.7677	0.0977665	0.0977665	0.371347	0.56688	-0.469113	0.469113
17629546	5.95792	5.4929	5.30527	0.187624	0.187624	0.277398	0.652647	-0.465023	0.465023
17606261	5.76894	5.30408	4.8817	0.422384	0.422384	0.0424722	0.88724	-0.464856	0.464856
17763172	5.95116	5.48636	5.38515	0.101208	0.101208	0.363588	0.566004	-0.464796	0.464796
17613757	5.17755	4.71301	4.37337	0.339641	0.339641	0.124896	0.804177	-0.464536	0.464536
17607299	6.15111	5.69038	5.4341	0.256288	0.256288	0.204435	0.717011	-0.460723	0.460723
17693071	6.48915	6.02854	5.72587	0.302663	0.302663	0.157954	0.763281	-0.460618	0.460618
17704825	6.54997	6.09325	6.00743	0.0858227	0.0858227	0.370897	0.542542	-0.456719	0.456719
17777209	6.06915	5.6145	5.32007	0.294431	0.294431	0.160225	0.749086	-0.454655	0.454655
17619437	6.34027	5.88668	5.52069	0.365991	0.365991	0.0876036	0.819585	-0.453594	0.453594
17659942	4.35527	3.9018	4.88908	-0.987282	0.987282	-0.533817	-0.533817	-0.453465	0.453465
17787128	5.89015	5.43751	5.32201	0.115505	0.115505	0.337131	0.568141	-0.452636	0.452636
17824344	5.21935	4.7685	4.50049	0.268016	0.268016	0.182835	0.718867	-0.450851	0.450851
17851813	6.08816	5.63744	5.6068	0.0306428	0.0306428	0.420072	0.481358	-0.450715	0.450715
17843290	5.07666	4.62597	4.37504	0.250926	0.250926	0.199763	0.701614	-0.450688	0.450688
17880121	6.37626	5.92581	5.78031	0.145502	0.145502	0.30495	0.595953	-0.450451	0.450451
17744336	5.26093	4.81421	4.69806	0.116152	0.116152	0.330569	0.562873	-0.446721	0.446721
17703296	4.7996	4.35564	4.09676	0.258878	0.258878	0.185079	0.702835	-0.443957	0.443957
17622119	7.234	6.7934	6.80932	-0.0159266	0.0159266	0.424672	0.424672	-0.440598	0.440598
17829493	4.66983	4.23016	3.58597	0.644191	0.644191	-0.204518	1.08386	-0.439673	0.439673
17883003	4.66983	4.23016	3.58597	0.644191	0.644191	-0.204518	1.08386	-0.439673	0.439673
17855546	4.70559	4.26641	4.14539	0.121014	0.121014	0.318168	0.560196	-0.439182	0.439182
17851421	6.10622	5.66888	5.30136	0.367521	0.367521	0.0698131	0.804854	-0.437334	0.437334
17882207	6.56483	6.12778	6.20693	-0.0791495	0.0791495	0.3579	0.3579	-0.437049	0.437049
17605069	6.18831	5.7513	5.61939	0.131909	0.131909	0.305104	0.568922	-0.437013	0.437013
17707428	4.80062	4.364	4.23159	0.132419	0.132419	0.304199	0.569037	-0.436618	0.436618
17882507	5.80178	5.36577	5.1478	0.217969	0.217969	0.218041	0.65398	-0.43601	0.43601
17713375	5.82944	5.39513	4.96216	0.432969	0.432969	0.00133862	0.867277	-0.434308	0.434308
17854667	5.39342	4.95979	4.91341	0.0463819	0.0463819	0.387251	0.480015	-0.433633	0.433633
17623158	4.29263	3.85917	3.54154	0.317628	0.317628	0.115839	0.751095	-0.433467	0.433467
17838598	5.8366	5.40798	5.25707	0.150916	0.150916	0.277705	0.579536	-0.428621	0.428621
17878760	6.6328	6.20566	5.74928	0.456375	0.456375	-0.0292305	0.883519	-0.427144	0.427144
17643476	8.23293	7.80622	7.54118	0.265036	0.265036	0.161677	0.691749	-0.426713	0.426713
17600675	6.5839	6.15768	6.02926	0.12842	0.12842	0.297805	0.554645	-0.426225	0.426225
17610189	6.5839	6.15768	6.02926	0.12842	0.12842	0.297805	0.554645	-0.426225	0.426225
17845434	4.57411	4.14842	3.11124	1.03718	1.03718	-0.611484	1.46287	-0.425695	0.425695
17712437	5.01016	4.58452	4.54327	0.0412518	0.0412518	0.384388	0.466892	-0.42564	0.42564
17731182	6.16212	5.7373	5.61482	0.122483	0.122483	0.302342	0.547308	-0.424825	0.424825
17749195	4.58728	4.16296	3.93438	0.228578	0.228578	0.195741	0.652898	-0.42432	0.42432
17843411	4.96921	4.54491	4.32548	0.219428	0.219428	0.204871	0.643728	-0.424299	0.424299
17754230	5.70542	5.28575	5.29548	-0.00972895	0.00972895	0.409938	0.409938	-0.419667	0.419667
17827113	5.87886	5.46046	5.33003	0.130428	0.130428	0.287977	0.548832	-0.418405	0.418405
17644331	5.55169	5.13447	5.0989	0.0355705	0.0355705	0.381647	0.452788	-0.417217	0.417217
17801896	5.22779	4.81192	4.61549	0.19643	0.19643	0.21944	0.612299	-0.415869	0.415869
17823188	5.78997	5.37426	5.17108	0.203183	0.203183	0.212526	0.618891	-0.415709	0.415709
17698369	5.00251	4.58767	4.2506	0.337063	0.337063	0.0777796	0.751905	-0.414842	0.414842
17831539	5.0684	4.65358	4.33057	0.323018	0.323018	0.091801	0.737837	-0.414819	0.414819
17610516	5.99928	5.58578	5.25223	0.333555	0.333555	0.0799433	0.747054	-0.413499	0.413499
17777302	6.2672	5.85417	5.16013	0.694041	0.694041	-0.281018	1.10706	-0.413022	0.413022
17718771	6.6208	6.20807	5.71957	0.488502	0.488502	-0.0757765	0.901228	-0.412726	0.412726
17808188	5.71022	5.30298	4.84543	0.457553	0.457553	-0.0503145	0.864791	-0.407238	0.407238
17875847	6.28447	5.87892	5.62492	0.253991	0.253991	0.151564	0.659547	-0.405556	0.405556
17726735	8.03048	7.62831	7.6695	-0.0411853	0.0411853	0.360982	0.360982	-0.402167	0.402167
17842292	5.83207	5.43455	5.24128	0.19327	0.19327	0.204242	0.590781	-0.397512	0.397512
17810714	6.1137	5.71875	5.60603	0.112717	0.112717	0.282238	0.507673	-0.394956	0.394956
17628646	5.76947	5.37533	5.12058	0.254743	0.254743	0.139397	0.648883	-0.39414	0.39414
17656988	7.23562	6.84395	6.85925	-0.0153025	0.0153025	0.376368	0.376368	-0.391671	0.391671
17801990	5.65679	5.26588	5.03281	0.233072	0.233072	0.157834	0.623978	-0.390906	0.390906
17857098	5.66023	5.26943	5.13463	0.134802	0.134802	0.255996	0.525599	-0.390798	0.390798
17601979	9.4402	9.05016	8.82353	0.22663	0.22663	0.163411	0.616672	-0.390042	0.390042
17793412	5.66206	5.27446	4.93814	0.336325	0.336325	0.0512767	0.723927	-0.387602	0.387602
17660032	4.42593	4.0391	3.82649	0.212611	0.212611	0.174222	0.599443	-0.386832	0.386832
17821011	5.70117	5.31438	4.67423	0.640145	0.640145	-0.253357	1.02693	-0.386789	0.386789
17600467	6.20231	5.81746	5.51637	0.301088	0.301088	0.0837653	0.685942	-0.384854	0.384854
17619053	4.81015	4.42596	4.2477	0.178259	0.178259	0.205931	0.56245	-0.38419	0.38419
17882035	5.75058	5.3684	5.23012	0.138281	0.138281	0.243891	0.520454	-0.382173	0.382173
17719224	6.31652	5.93499	5.94192	-0.00693743	0.00693743	0.374597	0.374597	-0.381534	0.381534
17685434	6.73218	6.35164	6.3405	0.0111433	0.0111433	0.369399	0.391685	-0.380542	0.380542
17879512	4.76298	4.38353	4.14103	0.242503	0.242503	0.136943	0.621949	-0.379446	0.379446
17735683	8.42524	8.04582	7.91849	0.127331	0.127331	0.252083	0.506746	-0.379414	0.379414
17785030	5.08265	4.70362	4.45155	0.252068	0.252068	0.126967	0.631103	-0.379035	0.379035
17600547	8.93351	8.55514	8.65047	-0.0953282	0.0953282	0.283045	0.283045	-0.378373	0.378373
17610061	8.93351	8.55514	8.65047	-0.0953282	0.0953282	0.283045	0.283045	-0.378373	0.378373
17779825	5.87664	5.49994	5.3791	0.120841	0.120841	0.255852	0.497533	-0.376693	0.376693
17693376	5.94851	5.57209	5.43804	0.134054	0.134054	0.242359	0.510467	-0.376413	0.376413
17874481	7.67334	7.29833	7.15024	0.148095	0.148095	0.226911	0.5231	-0.375006	0.375006
17791390	6.17476	5.80196	5.6983	0.103661	0.103661	0.269135	0.476456	-0.372795	0.372795
17744314	5.19216	4.81967	4.70117	0.118503	0.118503	0.253982	0.490988	-0.372485	0.372485
17757333	6.39392	6.02287	5.76317	0.259705	0.259705	0.111337	0.630748	-0.371042	0.371042
17729434	5.16836	4.80025	4.36068	0.439574	0.439574	-0.0714619	0.807687	-0.368112	0.368112
17644009	7.07344	6.70565	6.18589	0.519762	0.519762	-0.151973	0.887551	-0.367789	0.367789
17681241	5.50247	5.13499	4.70305	0.43194	0.43194	-0.0644595	0.799421	-0.367481	0.367481
17631448	9.0365	8.671	8.40849	0.262518	0.262518	0.102982	0.628018	-0.3655	0.3655
17697062	6.83754	6.47642	6.44142	0.0349978	0.0349978	0.326125	0.396121	-0.361123	0.361123
17853371	5.57773	5.21839	5.12774	0.0906547	0.0906547	0.268683	0.449992	-0.359338	0.359338
17725092	7.42857	7.07073	6.95547	0.115256	0.115256	0.242584	0.473097	-0.357841	0.357841
17698315	6.56572	6.20816	6.00082	0.207344	0.207344	0.150211	0.5649	-0.357556	0.357556
17614698	7.92173	7.56472	7.36749	0.197233	0.197233	0.159775	0.554241	-0.357008	0.357008
17816099	5.81494	5.4582	5.21944	0.238768	0.238768	0.117969	0.595504	-0.356737	0.356737
17874224	6.25428	5.90006	5.70641	0.193649	0.193649	0.160566	0.547864	-0.354215	0.354215
17780369	7.3148	6.96154	6.81824	0.143297	0.143297	0.209962	0.496556	-0.353259	0.353259
17746202	7.36834	7.02103	6.93349	0.0875417	0.0875417	0.259771	0.434855	-0.347313	0.347313
17824116	8.20623	7.85915	7.75338	0.105766	0.105766	0.241312	0.452845	-0.347078	0.347078
17760196	5.59381	5.24934	5.02882	0.22052	0.22052	0.123955	0.564995	-0.344475	0.344475
17696256	5.93696	5.59282	5.31084	0.281987	0.281987	0.0621499	0.626124	-0.344137	0.344137
17682317	6.49785	6.15432	5.73918	0.415142	0.415142	-0.0716126	0.758671	-0.343529	0.343529
17643139	6.11408	5.77088	5.72258	0.0482975	0.0482975	0.294903	0.391498	-0.3432	0.3432
17669860	7.38227	7.03954	6.46385	0.575685	0.575685	-0.232955	0.918415	-0.34273	0.34273
17874195	6.62801	6.28532	6.31415	-0.028827	0.028827	0.313859	0.313859	-0.342686	0.342686
17782860	6.40486	6.06336	5.24432	0.819045	0.819045	-0.47755	1.16054	-0.341494	0.341494
17802139	7.42761	7.08996	6.66996	0.419994	0.419994	-0.0823402	0.757648	-0.337654	0.337654
17799330	5.45108	5.11485	5.06447	0.0503843	0.0503843	0.285838	0.386607	-0.336223	0.336223
17688247	5.53023	5.19624	5.21836	-0.0221178	0.0221178	0.311873	0.311873	-0.333991	0.333991
17689559	7.5891	7.25798	6.81803	0.439956	0.439956	-0.108835	0.771077	-0.331121	0.331121
17795358	5.62626	5.29616	5.0784	0.217762	0.217762	0.112337	0.547861	-0.330099	0.330099
17715954	5.24789	4.91857	4.5313	0.38727	0.38727	-0.0579497	0.716591	-0.329321	0.329321
17826613	5.72184	5.39313	5.22534	0.167784	0.167784	0.16093	0.496497	-0.328714	0.328714
17714873	6.27957	5.9528	5.33373	0.619069	0.619069	-0.292301	0.945837	-0.326768	0.326768
17780265	5.29456	4.96815	4.7747	0.193446	0.193446	0.13297	0.519863	-0.326417	0.326417
17603265	6.01066	5.68513	5.49188	0.193251	0.193251	0.132274	0.518776	-0.325525	0.325525
17683261	6.33782	6.01269	5.76222	0.250472	0.250472	0.0746648	0.575609	-0.325137	0.325137
17703511	6.81678	6.49175	6.19858	0.293172	0.293172	0.0318581	0.618202	-0.32503	0.32503
17695991	6.92144	6.59908	6.19115	0.407928	0.407928	-0.0855627	0.730294	-0.322366	0.322366
17675619	6.39782	6.07626	5.86486	0.211399	0.211399	0.110155	0.532952	-0.321553	0.321553
17613753	5.73567	5.41515	5.27556	0.139592	0.139592	0.180927	0.46011	-0.320519	0.320519
17851823	6.29139	5.97132	5.60302	0.368295	0.368295	-0.0482235	0.688366	-0.320071	0.320071
17868552	6.9782	6.65894	6.41371	0.245233	0.245233	0.0740221	0.564488	-0.319255	0.319255
17702334	5.6091	5.28989	5.2091	0.0807915	0.0807915	0.238419	0.400002	-0.319211	0.319211
17876870	7.88697	7.56878	7.33513	0.233651	0.233651	0.0845303	0.551833	-0.318182	0.318182
17857172	7.16807	6.85152	6.52373	0.32779	0.32779	-0.011233	0.644346	-0.316557	0.316557
17659584	4.56657	4.25065	3.84396	0.406688	0.406688	-0.0907631	0.722613	-0.315925	0.315925
17690533	6.62889	6.31352	6.0603	0.253223	0.253223	0.0621459	0.568592	-0.315369	0.315369
17870159	7.01863	6.70348	6.51511	0.188365	0.188365	0.126789	0.50352	-0.315155	0.315155
17789285	7.20545	6.89074	6.56725	0.323497	0.323497	-0.0087962	0.638197	-0.314701	0.314701
17781921	6.29539	5.98253	5.63723	0.345303	0.345303	-0.032441	0.658164	-0.312862	0.312862
17849437	7.87273	7.56067	7.30087	0.259793	0.259793	0.0522711	0.571856	-0.312064	0.312064
17688091	7.0209	6.70977	6.55727	0.152507	0.152507	0.158622	0.463636	-0.311129	0.311129
17839665	4.80992	4.50027	4.01404	0.486232	0.486232	-0.176586	0.795877	-0.309645	0.309645
17603743	6.02129	5.71263	5.2115	0.501132	0.501132	-0.192473	0.809791	-0.308659	0.308659
17661741	7.50034	7.19429	7.29005	-0.0957658	0.0957658	0.210284	0.210284	-0.30605	0.30605
17690185	7.07281	6.77063	6.66292	0.107718	0.107718	0.194457	0.409892	-0.302174	0.302174
17765071	7.04831	6.74685	6.45096	0.295888	0.295888	0.00556619	0.597342	-0.301454	0.301454
17607423	6.51285	6.21375	5.65696	0.556788	0.556788	-0.257688	0.855888	-0.2991	0.2991
17706415	5.12604	4.82856	4.74599	0.0825704	0.0825704	0.214909	0.38005	-0.29748	0.29748
17727796	4.43689	4.14231	3.94858	0.193734	0.193734	0.100842	0.48831	-0.294576	0.294576
17741359	9.19551	8.90217	8.77933	0.122836	0.122836	0.170507	0.41618	-0.293343	0.293343
17774210	6.11218	5.82101	5.77361	0.0473929	0.0473929	0.243787	0.338572	-0.291179	0.291179
17710343	7.55618	7.2654	7.18008	0.085322	0.085322	0.205462	0.376106	-0.290784	0.290784
17654249	5.31801	5.0288	4.78937	0.239438	0.239438	0.0497701	0.528647	-0.289208	0.289208
17765325	6.58276	6.29981	6.12376	0.176046	0.176046	0.106909	0.459001	-0.282955	0.282955
17842798	6.79332	6.51061	6.31675	0.19385	0.19385	0.0888594	0.47656	-0.28271	0.28271
17846985	6.42346	6.14239	6.04439	0.0980003	0.0980003	0.183072	0.379073	-0.281072	0.281072
17873704	5.91164	5.63136	5.44984	0.181521	0.181521	0.0987611	0.461804	-0.280282	0.280282
17689947	7.86917	7.58938	7.41314	0.176232	0.176232	0.103559	0.456024	-0.279792	0.279792
17674510	5.47786	5.1997	4.96526	0.234437	0.234437	0.0437278	0.512601	-0.278165	0.278165
17605611	7.14047	6.86501	6.46001	0.404997	0.404997	-0.129538	0.680457	-0.27546	0.27546
17839120	6.92307	6.65056	6.16645	0.484113	0.484113	-0.211606	0.756621	-0.272507	0.272507
17848689	5.30856	5.03677	4.52975	0.507028	0.507028	-0.235239	0.778817	-0.271789	0.271789
17638074	5.81786	5.54775	5.4328	0.114944	0.114944	0.155168	0.385055	-0.270112	0.270112
17652951	7.06337	6.79392	6.38639	0.407525	0.407525	-0.138073	0.676977	-0.269452	0.269452
17817338	6.00451	5.74151	5.39506	0.346446	0.346446	-0.0834434	0.609449	-0.263003	0.263003
17730578	6.03124	5.76949	5.38841	0.381087	0.381087	-0.119341	0.642833	-0.261746	0.261746
17797004	5.93022	5.67614	5.37397	0.302168	0.302168	-0.0480838	0.556253	-0.254084	0.254084
17882635	5.53999	5.29438	4.95618	0.338195	0.338195	-0.0925833	0.583807	-0.245612	0.245612
17774168	10.9815	10.7391	10.6064	0.132661	0.132661	0.109774	0.375096	-0.242435	0.242435
17703427	4.92062	4.67845	4.37857	0.299886	0.299886	-0.0577131	0.542059	-0.242173	0.242173
17605301	8.231	7.99246	7.58804	0.404419	0.404419	-0.165876	0.642962	-0.238543	0.238543
17624453	5.79659	5.5604	5.37396	0.186444	0.186444	0.0497512	0.422639	-0.236195	0.236195
17663879	5.89754	5.67442	5.5713	0.10312	0.10312	0.119999	0.326239	-0.223119	0.223119
17870833	6.1644	5.95342	5.76999	0.183437	0.183437	0.0275444	0.394418	-0.210981	0.210981
17796611	7.95235	7.74148	7.64854	0.0929347	0.0929347	0.117935	0.303804	-0.210869	0.210869
17611421	5.16123	4.95974	4.6687	0.291038	0.291038	-0.0895475	0.492528	-0.20149	0.20149
17600865	7.58463	7.3862	7.23382	0.152386	0.152386	0.0460385	0.350811	-0.198425	0.198425
17750735	5.76298	5.58276	5.38054	0.202214	0.202214	-0.0219923	0.382436	-0.180222	0.180222
17883744	3.62452	3.89188	4.35817	-0.466285	0.466285	-0.198924	-0.733646	0.267361	0.267361
17642793	3.99433	4.28118	4.56104	-0.279869	0.279869	0.00697862	-0.566717	0.286848	0.286848
17642795	3.99433	4.28118	4.56104	-0.279869	0.279869	0.00697862	-0.566717	0.286848	0.286848
17873629	3.41344	3.70093	2.63989	1.06105	1.06105	-0.773552	0.773552	0.287496	0.287496
17851407	5.00892	5.3098	5.46833	-0.15853	0.15853	0.142349	-0.45941	0.30088	0.30088
17880483	4.9609	5.26823	5.40923	-0.140997	0.140997	0.166339	-0.448333	0.307336	0.307336
17843379	4.6277	4.94595	5.06669	-0.120741	0.120741	0.197504	-0.438986	0.318245	0.318245
17713887	7.1744	7.49349	7.62706	-0.133567	0.133567	0.185529	-0.452663	0.319096	0.319096
17727441	4.16878	4.51027	4.87937	-0.369098	0.369098	-0.027604	-0.710593	0.341494	0.341494
17850594	4.65466	4.99859	5.25623	-0.25764	0.25764	0.0862889	-0.60157	0.343929	0.343929
17724160	4.54072	4.90015	5.01955	-0.119393	0.119393	0.240038	-0.478824	0.359431	0.359431
17818430	5.80515	6.16812	6.32817	-0.160051	0.160051	0.20292	-0.523022	0.362971	0.362971
17790891	3.4128	3.77686	4.46562	-0.688757	0.688757	-0.324695	-1.05282	0.364062	0.364062
17724523	4.4016	4.78511	4.97432	-0.189209	0.189209	0.194298	-0.572716	0.383507	0.383507
17712710	5.26722	5.65597	5.772	-0.116026	0.116026	0.272724	-0.504776	0.38875	0.38875
17676538	4.01501	4.40475	4.61036	-0.205607	0.205607	0.184133	-0.595347	0.38974	0.38974
17812310	3.03327	3.42342	3.99914	-0.575719	0.575719	-0.185561	-0.965877	0.390158	0.390158
17838637	3.97907	4.37387	4.54414	-0.170267	0.170267	0.224538	-0.565072	0.394805	0.394805
17810192	4.17382	4.57159	4.70688	-0.135291	0.135291	0.262485	-0.533067	0.397776	0.397776
17617129	5.96412	6.36358	6.57268	-0.209096	0.209096	0.190365	-0.608557	0.399461	0.399461
17804303	4.63023	5.03338	5.73604	-0.702659	0.702659	-0.299503	-1.10581	0.403156	0.403156
17807281	4.49705	4.90513	5.13646	-0.231326	0.231326	0.176761	-0.639414	0.408087	0.408087
17700729	4.5842	4.99376	5.28586	-0.292105	0.292105	0.117454	-0.701663	0.409558	0.409558
17609597	5.44101	5.85371	6.01212	-0.158415	0.158415	0.254276	-0.571106	0.412691	0.412691
17619421	5.02126	5.44525	5.6607	-0.215457	0.215457	0.208535	-0.639448	0.423992	0.423992
17801876	3.43464	3.85947	4.11148	-0.252012	0.252012	0.17282	-0.676844	0.424832	0.424832
17831126	5.12709	5.56199	5.38009	0.181907	0.181907	0.252993	-0.252993	0.4349	0.4349
17653713	4.02461	4.47251	4.58333	-0.11082	0.11082	0.337082	-0.558722	0.447902	0.447902
17670072	3.80985	4.25802	4.41685	-0.158823	0.158823	0.289353	-0.606999	0.448176	0.448176
17709291	4.21758	4.67552	4.60917	0.0663505	0.0663505	0.391586	-0.391586	0.457937	0.457937
17601001	5.87293	6.34084	6.70154	-0.360703	0.360703	0.107214	-0.828619	0.467916	0.467916
17601335	5.87293	6.34084	6.70154	-0.360703	0.360703	0.107214	-0.828619	0.467916	0.467916
17723396	4.52372	4.99683	5.1639	-0.167069	0.167069	0.306042	-0.64018	0.473111	0.473111
17603153	5.08593	5.56348	5.79631	-0.232833	0.232833	0.244711	-0.710377	0.477544	0.477544
17797445	4.12636	4.60453	5.04572	-0.441189	0.441189	0.0369804	-0.919357	0.478169	0.478169
17626033	4.80009	5.28716	5.2525	0.0346631	0.0346631	0.452407	-0.452407	0.48707	0.48707
17612972	4.61025	5.10752	5.14704	-0.0395235	0.0395235	0.457746	-0.536793	0.49727	0.49727
17629648	4.61025	5.10752	5.14704	-0.0395235	0.0395235	0.457746	-0.536793	0.49727	0.49727
17811325	4.49992	5.00018	5.30979	-0.30961	0.30961	0.190651	-0.809872	0.500262	0.500262
17880162	3.18849	3.69421	4.13709	-0.442882	0.442882	0.0628422	-0.948606	0.505724	0.505724
17640636	3.31548	3.83025	4.40127	-0.571024	0.571024	-0.0562532	-1.08579	0.51477	0.51477
17610855	4.22819	4.75092	4.68999	0.06093	0.06093	0.461803	-0.461803	0.522733	0.522733
17790133	3.84317	4.37434	4.49912	-0.124779	0.124779	0.406391	-0.65595	0.531171	0.531171
17735918	3.00977	3.54374	3.79312	-0.249385	0.249385	0.284581	-0.783351	0.533966	0.533966
17652674	0.572302	1.11991	2.1791	-1.05919	1.05919	-0.511574	-1.6068	0.547613	0.547613
17666434	3.72886	4.27969	4.31682	-0.0371357	0.0371357	0.513692	-0.587964	0.550828	0.550828
17802718	2.60468	3.16129	4.04047	-0.879181	0.879181	-0.322578	-1.43578	0.556602	0.556602
17689669	3.88981	4.45159	4.88242	-0.430826	0.430826	0.130959	-0.992611	0.561785	0.561785
17841793	4.03352	4.60995	4.57591	0.034039	0.034039	0.542389	-0.542389	0.576428	0.576428
17832714	2.83048	3.40787	3.75861	-0.350736	0.350736	0.226653	-0.928125	0.577389	0.577389
17609259	3.83404	4.41154	4.47322	-0.0616845	0.0616845	0.515813	-0.639182	0.577498	0.577498
17698466	2.31506	2.90304	2.94444	-0.0413929	0.0413929	0.546591	-0.629377	0.587984	0.587984
17785904	2.17009	2.76998	3.54261	-0.77263	0.77263	-0.17274	-1.37252	0.59989	0.59989
17607075	3.48561	4.09904	4.04312	0.0559208	0.0559208	0.557502	-0.557502	0.613423	0.613423
17726532	3.55171	4.1656	4.54107	-0.375465	0.375465	0.238429	-0.989359	0.613894	0.613894
17824346	3.14291	3.76127	4.32474	-0.563474	0.563474	0.0548856	-1.18183	0.618359	0.618359
17608539	2.92556	3.55734	3.60024	-0.0429005	0.0429005	0.588871	-0.674672	0.631771	0.631771
17774120	3.5577	4.19046	4.54666	-0.356203	0.356203	0.276554	-0.98896	0.632757	0.632757
17875942	3.76142	4.40104	4.14196	0.259083	0.259083	0.380542	-0.380542	0.639626	0.639626
17730310	3.69083	4.33408	4.67475	-0.340668	0.340668	0.302589	-0.983926	0.643257	0.643257
17872106	3.76468	4.41465	4.47922	-0.0645633	0.0645633	0.585406	-0.714532	0.649969	0.649969
17859208	2.9128	3.56511	3.6826	-0.117485	0.117485	0.534829	-0.7698	0.652314	0.652314
17671409	2.38038	3.03642	3.5512	-0.514778	0.514778	0.141265	-1.17082	0.656042	0.656042
17825916	3.3419	4.01707	4.19983	-0.182766	0.182766	0.492404	-0.857936	0.67517	0.67517
17863213	4.09046	4.77991	5.20706	-0.42715	0.42715	0.262299	-1.1166	0.689449	0.689449
17763595	2.48724	3.18736	3.2241	-0.036739	0.036739	0.663378	-0.736856	0.700117	0.700117
17638072	1.16272	1.86857	2.38357	-0.515004	0.515004	0.190839	-1.22085	0.705843	0.705843
17760437	3.67061	4.37761	4.58221	-0.204604	0.204604	0.502394	-0.911603	0.706998	0.706998
17881739	2.59473	3.31145	3.94925	-0.637801	0.637801	0.0789245	-1.35453	0.716725	0.716725
17656473	2.26776	2.99328	3.07626	-0.0829763	0.0829763	0.642546	-0.808499	0.725522	0.725522
17605345	2.66568	3.40042	3.68908	-0.28866	0.28866	0.446077	-1.0234	0.734737	0.734737
17605419	2.05311	2.8095	2.96693	-0.157427	0.157427	0.598964	-0.913818	0.756391	0.756391
17667230	4.02987	4.79209	4.773	0.0190933	0.0190933	0.743127	-0.743127	0.76222	0.76222
17629072	2.10486	2.97999	3.33901	-0.35902	0.35902	0.516108	-1.23415	0.875128	0.875128
17806163	1.55398	2.52437	3.37157	-0.847202	0.847202	0.123189	-1.81759	0.97039	0.97039
17601643	5.02731	6.01542	6.27205	-0.256626	0.256626	0.731489	-1.24474	0.988115	0.988115
17735454	0.0502371	1.03854	0.744785	0.293759	0.293759	0.694548	-0.694548	0.988307	0.988307
17839704	2.81639	3.85728	3.83517	0.0221124	0.0221124	1.01878	-1.01878	1.04089	1.04089
17876562	3.03936	4.08661	3.82823	0.25838	0.25838	0.788873	-0.788873	1.04725	1.04725
17791727	2.3936	3.55631	3.88982	-0.333513	0.333513	0.829192	-1.49622	1.16271	1.16271
17723744	0.844598	2.12589	2.41431	-0.288414	0.288414	0.992882	-1.56971	1.2813	1.2813
17780194	0.698411	2.00017	1.29653	0.703637	0.703637	0.598119	-0.598119	1.30176	1.30176
17711284	1.48425	2.84179	2.95527	-0.113479	0.113479	1.24406	-1.47102	1.35754	1.35754
17849291	0.594716	2.0484	3.04891	-1.00051	1.00051	0.453178	-2.45419	1.45368	1.45368
17664440	1.47866	3.07119	2.88947	0.181714	0.181714	1.41082	-1.41082	1.59253	1.59253
17602597	1.10206	3.0315	3.07453	-0.0430334	0.0430334	1.8864	-1.97247	1.92943	1.92943

## Sheet: Male BPA(0.5+50) feminization
Probe_ID	Female Control, FC (avg exp)	Male BPA, mBPA(0.5+50) (avg exp)	Male Control, MC (avg exp)	mBPA(0.5+50)-FC	mBPA(0.5+50)-FC (absolute value)	Column, J-F (415st closer to FC)	MC-FC	mBPA(0.5+50)-MC	mBPA(0.5+50)-MC (absolute value)
17642329	8.42658	6.3254	6.80401	-2.10118	2.10118	-1.62256	-1.62256	-0.478616	0.478616
17841858	6.47951	5.01229	4.50915	-1.46722	1.46722	-0.964084	-1.97036	0.503137	0.503137	upregulation
17744073	8.46553	9.33617	8.92687	0.870638	0.870638	-0.461342	0.461342	0.409296	0.409296	downregulation
17787572	6.43813	5.654	5.19228	-0.784135	0.784135	-0.322419	-1.24585	0.461716	0.461716
17806222	10.3273	10.8128	10.6234	0.485515	0.485515	-0.296149	0.296149	0.189366	0.189366
17655700	6.94346	6.37144	6.03678	-0.572029	0.572029	-0.237373	-0.906686	0.334657	0.334657
17808188	5.71022	5.17807	4.84543	-0.532148	0.532148	-0.199506	-0.864791	0.332643	0.332643
17609991	6.03334	5.53396	5.21416	-0.499385	0.499385	-0.179588	-0.819181	0.319797	0.319797
17782860	6.40486	5.75419	5.24432	-0.650663	0.650663	-0.140787	-1.16054	0.509876	0.509876
17881889	6.20585	5.83322	5.57871	-0.372629	0.372629	-0.118127	-0.627131	0.254502	0.254502
17875310	5.68864	4.97842	4.36404	-0.710223	0.710223	-0.0958394	-1.32461	0.614384	0.614384
17851673	8.31391	7.9541	7.67056	-0.359809	0.359809	-0.0762636	-0.643355	0.283546	0.283546
17698522	6.94408	6.715	6.55616	-0.229084	0.229084	-0.0702493	-0.387918	0.158835	0.158835
17646209	2.93537	3.51196	4.03198	0.57659	0.57659	-0.0565699	1.09661	-0.52002	0.52002
17750150	6.38329	6.01453	5.68014	-0.368763	0.368763	-0.0343711	-0.703155	0.334392	0.334392
17797445	4.12636	4.59478	5.04572	0.468425	0.468425	-0.0174924	0.919357	-0.450933	0.450933
17609729	5.68467	5.38687	5.08891	-0.297799	0.297799	0.00016681	-0.595765	0.297966	0.297966
17817588	6.57709	6.15701	5.7251	-0.420078	0.420078	0.0118311	-0.851988	0.431909	0.431909
17704825	6.54997	6.28776	6.00743	-0.262213	0.262213	0.0181159	-0.542542	0.280329	0.280329
17650607	6.44833	6.17088	5.86994	-0.27745	0.27745	0.0234947	-0.578394	0.300944	0.300944
17866724	5.46523	4.85018	4.20372	-0.615054	0.615054	0.0314052	-1.26151	0.646459	0.646459
17853768	5.74589	5.4909	5.19536	-0.254991	0.254991	0.0405491	-0.55053	0.29554	0.29554
17714873	6.27957	5.82772	5.33373	-0.451843	0.451843	0.0421504	-0.945837	0.493993	0.493993
17864386	7.26819	6.96406	6.60919	-0.304127	0.304127	0.0507509	-0.659004	0.354877	0.354877
17819983	7.14868	6.87223	6.54477	-0.276447	0.276447	0.0510094	-0.603904	0.327457	0.327457
17629913	8.1083	7.85282	7.54525	-0.255483	0.255483	0.0520904	-0.563056	0.307573	0.307573
17824346	3.14291	3.70051	4.32474	0.557605	0.557605	0.0666234	1.18183	-0.624228	0.624228
17851954	6.6562	6.40876	6.05925	-0.247442	0.247442	0.102074	-0.596958	0.349516	0.349516
17760196	5.59381	5.36649	5.02882	-0.227321	0.227321	0.110353	-0.564995	0.337674	0.337674
17676296	6.95724	6.66569	6.2605	-0.291548	0.291548	0.113642	-0.696739	0.405191	0.405191
17607045	7.68962	7.52221	7.2332	-0.167415	0.167415	0.121591	-0.456421	0.289006	0.289006
17832893	5.18765	4.92344	4.53588	-0.264215	0.264215	0.123345	-0.651775	0.38756	0.38756
17862007	4.94063	4.62179	4.17638	-0.31884	0.31884	0.126569	-0.764248	0.445409	0.445409
17757565	7.55005	7.41539	7.14753	-0.134666	0.134666	0.133193	-0.402524	0.267858	0.267858
17718771	6.6208	6.23793	5.71957	-0.38287	0.38287	0.135488	-0.901228	0.518358	0.518358
17882475	4.96011	4.73303	4.37021	-0.227083	0.227083	0.135733	-0.589899	0.362816	0.362816
17600909	5.25849	4.97267	4.54285	-0.285826	0.285826	0.143994	-0.715646	0.42982	0.42982
17601229	5.25849	4.97267	4.54285	-0.285826	0.285826	0.143994	-0.715646	0.42982	0.42982
17603173	5.55196	5.24683	4.79126	-0.305123	0.305123	0.150453	-0.760699	0.455576	0.455576
17665832	3.19812	3.79247	4.54608	0.594348	0.594348	0.159264	1.34796	-0.753612	0.753612
17658137	6.06759	5.756	5.27552	-0.31159	0.31159	0.16889	-0.79207	0.48048	0.48048
17823969	4.18929	3.78553	3.20856	-0.403753	0.403753	0.173221	-0.980728	0.576974	0.576974
17690963	8.50523	8.33477	7.99079	-0.170462	0.170462	0.173524	-0.514447	0.343985	0.343985
17633143	6.06285	5.8134	5.38959	-0.249453	0.249453	0.174354	-0.67326	0.423807	0.423807
17865955	6.17874	5.94371	5.53393	-0.235035	0.235035	0.174739	-0.644809	0.409774	0.409774
17832113	5.48234	5.67456	6.04231	0.192219	0.192219	0.175534	0.559971	-0.367752	0.367752
17695991	6.92144	6.6446	6.19115	-0.276845	0.276845	0.176605	-0.730294	0.453449	0.453449
17871267	5.25784	4.90431	4.37144	-0.353531	0.353531	0.179333	-0.886396	0.532864	0.532864
17653953	6.62078	6.63912	6.43732	0.0183495	0.0183495	0.18346	-0.18346	0.20181	0.20181
17880477	8.04815	7.90615	7.56521	-0.142002	0.142002	0.198938	-0.482943	0.340941	0.340941
17711572	6.84647	6.70508	6.35976	-0.141392	0.141392	0.203921	-0.486706	0.345313	0.345313
17719453	8.45462	8.55105	8.24303	0.0964306	0.0964306	0.211587	-0.211587	0.308018	0.308018
17757392	5.15147	5.34635	5.75283	0.194882	0.194882	0.211601	0.601364	-0.406482	0.406482
17668365	2.94295	3.35053	3.97008	0.407576	0.407576	0.211977	1.02713	-0.619554	0.619554
17747418	8.82707	8.72077	8.40231	-0.1063	0.1063	0.212154	-0.424753	0.318453	0.318453
17662959	5.59237	5.56687	5.32759	-0.0254945	0.0254945	0.213784	-0.264773	0.239279	0.239279
17881093	5.98873	5.88188	5.55981	-0.106858	0.106858	0.21521	-0.428925	0.322068	0.322068
17600835	7.83533	7.72367	7.39639	-0.11166	0.11166	0.215612	-0.438932	0.327272	0.327272
17726740	2.92575	3.24111	3.77497	0.315355	0.315355	0.218508	0.849219	-0.533864	0.533864
17736456	4.82949	4.66295	4.27615	-0.166538	0.166538	0.220263	-0.553339	0.386801	0.386801
17800587	6.39161	6.33594	6.05923	-0.0556696	0.0556696	0.221037	-0.332376	0.276707	0.276707
17754248	6.80984	6.69886	6.36604	-0.110976	0.110976	0.221844	-0.443795	0.33282	0.33282
17749947	6.89487	6.48871	5.86041	-0.406163	0.406163	0.222138	-1.03446	0.628301	0.628301
17604631	7.53159	7.97776	7.29892	0.446169	0.446169	0.232668	-0.232668	0.678837	0.678837
17822868	8.17858	8.0582	7.70346	-0.12038	0.12038	0.23436	-0.47512	0.35474	0.35474
17768821	7.87555	7.77318	7.43218	-0.102369	0.102369	0.238632	-0.443369	0.341001	0.341001
17665483	6.72857	6.30021	5.62878	-0.42836	0.42836	0.243068	-1.09979	0.671429	0.671429
17801019	6.51646	6.57484	6.26863	0.0583821	0.0583821	0.247831	-0.247831	0.306213	0.306213
17663090	7.14623	7.51864	6.89831	0.372408	0.372408	0.247924	-0.247924	0.620332	0.620332
17774291	6.20588	6.13302	5.80635	-0.072867	0.072867	0.253805	-0.399539	0.326672	0.326672
17791076	5.70105	5.48003	5.00392	-0.221017	0.221017	0.255091	-0.697125	0.476108	0.476108
17639197	6.00606	5.71253	5.16163	-0.293531	0.293531	0.257365	-0.844427	0.550896	0.550896
17640579	5.20968	5.02565	4.57873	-0.184023	0.184023	0.262903	-0.63095	0.446927	0.446927
17789285	7.20545	7.02273	6.56725	-0.18272	0.18272	0.272757	-0.638197	0.455477	0.455477
17682317	6.49785	6.25805	5.73918	-0.239804	0.239804	0.279063	-0.758671	0.518867	0.518867
17722336	5.69869	5.62591	5.27356	-0.0727824	0.0727824	0.27957	-0.425135	0.352352	0.352352
17688437	6.07837	6.03924	5.71841	-0.0391209	0.0391209	0.281716	-0.359957	0.320837	0.320837
17870751	4.32253	4.03248	3.45344	-0.290049	0.290049	0.288994	-0.869091	0.579043	0.579043
17644009	7.07344	6.77489	6.18589	-0.298551	0.298551	0.290449	-0.887551	0.589	0.589
17880863	6.32177	6.45914	6.02919	0.137369	0.137369	0.292587	-0.292587	0.429956	0.429956
17676754	6.08212	6.0286	5.68085	-0.0535206	0.0535206	0.294229	-0.401271	0.34775	0.34775
17846210	6.41176	6.32368	5.93922	-0.0880878	0.0880878	0.296374	-0.47255	0.384462	0.384462
17828543	5.55785	5.44719	5.0395	-0.110653	0.110653	0.29704	-0.518346	0.407693	0.407693
17605831	8.55488	8.28653	7.71993	-0.268341	0.268341	0.298265	-0.834948	0.566606	0.566606
17731351	6.786	6.86118	6.48207	0.0751706	0.0751706	0.303937	-0.303937	0.379108	0.379108
17657302	4.84014	4.69137	4.23694	-0.148775	0.148775	0.305649	-0.6032	0.454424	0.454424
17689334	7.66495	7.57025	7.16828	-0.0947014	0.0947014	0.307273	-0.496676	0.401974	0.401974
17702438	5.81363	5.70617	5.28918	-0.107464	0.107464	0.309529	-0.524457	0.416993	0.416993
17677021	4.84817	4.78804	5.15919	-0.0601348	0.0601348	0.311014	0.311014	-0.371149	0.371149
17606741	5.80972	5.6611	5.19362	-0.148625	0.148625	0.318852	-0.616101	0.467476	0.467476
17882025	10.1269	10.3418	9.80199	0.214859	0.214859	0.324921	-0.324921	0.53978	0.53978
17663879	5.89754	5.94487	5.5713	0.047327	0.047327	0.326239	-0.326239	0.373566	0.373566
17787099	9.0365	9.21193	8.70963	0.175426	0.175426	0.326875	-0.326875	0.502301	0.502301
17605895	7.19073	7.17064	6.82094	-0.0200917	0.0200917	0.329605	-0.369789	0.349697	0.349697
17785849	7.86354	8.04839	7.53138	0.184854	0.184854	0.332157	-0.332157	0.517011	0.517011
17802139	7.42761	7.21517	6.66996	-0.212437	0.212437	0.332773	-0.757648	0.545211	0.545211
17702182	8.53015	8.56578	8.19619	0.0356308	0.0356308	0.33396	-0.33396	0.369591	0.369591
17621377	7.63056	7.8092	7.29426	0.178635	0.178635	0.336304	-0.336304	0.514939	0.514939
17840408	3.5872	3.08623	2.24894	-0.500975	0.500975	0.336311	-1.33826	0.837287	0.837287
17769299	3.28518	3.77588	4.60496	0.490701	0.490701	0.338388	1.31979	-0.829088	0.829088
17826267	8.81236	8.91182	8.47369	0.0994592	0.0994592	0.338672	-0.338672	0.438131	0.438131
17839665	4.80992	4.5821	4.01404	-0.227816	0.227816	0.340245	-0.795877	0.568061	0.568061
17671916	6.69525	6.61914	6.19791	-0.0761086	0.0761086	0.345116	-0.497333	0.421224	0.421224
17715845	6.61788	6.67099	6.27131	0.0531121	0.0531121	0.346574	-0.346574	0.399686	0.399686
17853338	7.29275	7.42871	6.94544	0.135954	0.135954	0.347313	-0.347313	0.483267	0.483267
17731798	6.35612	6.09081	5.47747	-0.265301	0.265301	0.348044	-0.878646	0.613345	0.613345
17780379	4.50039	4.3901	3.93055	-0.110287	0.110287	0.349261	-0.569836	0.459548	0.459548
17720404	4.13965	4.11892	3.74665	-0.0207239	0.0207239	0.351548	-0.392996	0.372272	0.372272
17678731	8.9801	9.18858	8.6282	0.208476	0.208476	0.351903	-0.351903	0.560379	0.560379
17777693	6.53988	6.51413	6.13554	-0.025744	0.025744	0.352847	-0.404335	0.378591	0.378591
17636301	10.6767	10.6191	10.2049	-0.0575493	0.0575493	0.356694	-0.471792	0.414243	0.414243
17636302	10.6767	10.6191	10.2049	-0.0575493	0.0575493	0.356694	-0.471792	0.414243	0.414243
17616319	5.1106	4.83219	4.19686	-0.278408	0.278408	0.356927	-0.913742	0.635335	0.635335
17876849	6.5555	6.35627	5.79781	-0.199228	0.199228	0.35923	-0.757686	0.558458	0.558458
17751329	5.55868	5.34071	5.91867	-0.217966	0.217966	0.359989	0.359989	-0.577955	0.577955
17604229	5.34967	5.27801	4.84239	-0.0716576	0.0716576	0.363962	-0.507277	0.435619	0.435619
17648530	11.6143	11.6571	11.2494	0.0428877	0.0428877	0.364833	-0.364833	0.40772	0.40772
17697861	7.01142	6.85951	6.34232	-0.151915	0.151915	0.365277	-0.669106	0.517191	0.517191
17790063	7.95303	8.02599	7.587	0.072956	0.072956	0.366028	-0.366028	0.438984	0.438984
17609795	6.33682	6.21922	5.73415	-0.117606	0.117606	0.36746	-0.602672	0.485066	0.485066
17878760	6.6328	6.37529	5.74928	-0.257512	0.257512	0.368495	-0.883519	0.626007	0.626007
17648532	9.38279	9.63443	9.0119	0.251641	0.251641	0.370889	-0.370889	0.62253	0.62253
17772978	7.76434	7.69987	7.26256	-0.0644718	0.0644718	0.372842	-0.501785	0.437313	0.437313
17796700	4.55829	4.15959	3.38697	-0.398697	0.398697	0.373926	-1.17132	0.772622	0.772622
17725934	5.58097	5.41782	4.87458	-0.163149	0.163149	0.380085	-0.706383	0.543234	0.543234
17882329	5.94165	5.83535	5.34894	-0.106301	0.106301	0.380109	-0.592711	0.48641	0.48641
17792709	7.34605	7.5025	6.96501	0.15645	0.15645	0.381036	-0.381036	0.537486	0.537486
17676012	4.94237	5.00849	4.56132	0.0661214	0.0661214	0.381052	-0.381052	0.447173	0.447173
17785934	4.35913	4.10316	3.46413	-0.255977	0.255977	0.383053	-0.895006	0.639029	0.639029
17603477	7.21615	7.12586	6.65051	-0.090285	0.090285	0.385065	-0.565635	0.47535	0.47535
17883207	5.05292	5.53169	6.39885	0.478773	0.478773	0.388387	1.34593	-0.86716	0.86716
17702184	6.79596	6.80589	6.40677	0.00993048	0.00993048	0.389183	-0.389183	0.399114	0.399114
17710984	7.15407	7.19634	6.76239	0.042269	0.042269	0.391688	-0.391688	0.433957	0.433957
17698315	6.56572	6.47916	6.00082	-0.0865531	0.0865531	0.391794	-0.5649	0.478347	0.478347
17863238	3.68713	3.88863	4.48289	0.2015	0.2015	0.392756	0.795755	-0.594256	0.594256
17604311	6.12251	5.94042	5.36546	-0.182087	0.182087	0.392874	-0.757048	0.574961	0.574961
17789982	5.70901	5.44333	4.78428	-0.265675	0.265675	0.393376	-0.924726	0.659051	0.659051
17611240	3.58657	3.51604	3.9819	-0.0705268	0.0705268	0.395334	0.395334	-0.465861	0.465861
17882639	7.713	7.37416	6.63976	-0.338841	0.338841	0.395561	-1.07324	0.734402	0.734402
17752747	6.02162	5.83646	5.25525	-0.185163	0.185163	0.396049	-0.766376	0.581212	0.581212
17725192	5.30399	5.02456	4.34702	-0.279429	0.279429	0.398114	-0.956971	0.677542	0.677542
17610691	8.23986	8.31781	7.83822	0.0779456	0.0779456	0.401649	-0.401649	0.479595	0.479595
17792083	2.44916	2.88006	3.71313	0.430898	0.430898	0.402169	1.26397	-0.833067	0.833067
17626410	5.80229	5.88426	5.40008	0.0819643	0.0819643	0.402215	-0.402215	0.484179	0.484179
17807247	5.51283	5.35243	5.91662	-0.160407	0.160407	0.403785	0.403785	-0.564193	0.564193
17763548	6.18111	6.03615	5.48701	-0.144957	0.144957	0.404186	-0.694099	0.549143	0.549143
17795734	7.92261	8.05565	7.51603	0.133038	0.133038	0.406584	-0.406584	0.539623	0.539623
17608857	7.30794	7.41189	6.89795	0.103955	0.103955	0.409989	-0.409989	0.513944	0.513944
17710221	8.4656	8.44365	8.01146	-0.0219446	0.0219446	0.410249	-0.454138	0.432193	0.432193
17743103	9.5354	9.61593	9.12323	0.0805283	0.0805283	0.412175	-0.412175	0.492703	0.492703
17690621	4.75102	4.66017	4.15703	-0.0908478	0.0908478	0.412287	-0.593983	0.503135	0.503135
17687187	6.42021	6.49006	6.00636	0.0698485	0.0698485	0.413855	-0.413855	0.483704	0.483704
17698694	4.86456	5.04179	4.45013	0.177234	0.177234	0.414425	-0.414425	0.591659	0.591659
17705578	5.4424	5.48517	5.02583	0.0427698	0.0427698	0.416574	-0.416574	0.459343	0.459343
17830364	2.68299	2.58461	3.09957	-0.0983731	0.0983731	0.416584	0.416584	-0.514957	0.514957
17862587	8.56413	8.73171	8.14669	0.167579	0.167579	0.417443	-0.417443	0.585022	0.585022
17703427	4.92062	4.85879	4.37857	-0.0618314	0.0618314	0.418396	-0.542059	0.480227	0.480227
17765071	7.04831	6.95917	6.45096	-0.08914	0.08914	0.419062	-0.597342	0.508202	0.508202
17855074	3.96965	3.87025	3.35094	-0.0994006	0.0994006	0.419901	-0.618702	0.519301	0.519301
17848650	6.87942	7.00601	6.45777	0.126599	0.126599	0.421645	-0.421645	0.548243	0.548243
17689943	5.85088	5.47798	4.68193	-0.372901	0.372901	0.423149	-1.16895	0.79605	0.79605
17600021	6.6896	6.58948	6.06618	-0.100122	0.100122	0.423178	-0.623421	0.523299	0.523299
17840809	5.75569	5.86466	5.33111	0.108974	0.108974	0.424577	-0.424577	0.533551	0.533551
17826858	3.31305	3.43408	3.98014	0.121024	0.121024	0.425038	0.667086	-0.546062	0.546062
17874683	5.22147	5.20559	4.76389	-0.0158808	0.0158808	0.425814	-0.457575	0.441695	0.441695
17635885	7.58403	7.61922	7.15717	0.0351956	0.0351956	0.426856	-0.426856	0.462052	0.462052
17723951	6.13572	6.25346	5.70829	0.117738	0.117738	0.427436	-0.427436	0.545175	0.545175
17608885	6.46965	6.31077	5.72357	-0.158878	0.158878	0.428326	-0.746083	0.587204	0.587204
17676907	7.24203	7.21403	6.75747	-0.028004	0.028004	0.428554	-0.484562	0.456558	0.456558
17785391	3.82157	3.73954	4.25016	-0.0820297	0.0820297	0.42859	0.42859	-0.51062	0.51062
17814005	2.68363	2.62318	3.11323	-0.0604542	0.0604542	0.429598	0.429598	-0.490052	0.490052
17609255	4.80284	4.33128	3.42848	-0.471566	0.471566	0.431226	-1.37436	0.902792	0.902792
17624393	7.6484	7.74511	7.21485	0.0967115	0.0967115	0.433556	-0.433556	0.530267	0.530267
17802718	2.60468	3.1054	4.04047	0.500715	0.500715	0.434354	1.43578	-0.935068	0.935068
17761856	7.16968	7.03599	6.467	-0.133686	0.133686	0.435304	-0.702675	0.568989	0.568989
17754515	6.70136	6.9239	6.26463	0.222537	0.222537	0.436729	-0.436729	0.659265	0.659265
17604687	6.08356	6.05952	5.5985	-0.0240404	0.0240404	0.436983	-0.485064	0.461023	0.461023
17661049	5.42389	5.38535	4.90675	-0.038546	0.038546	0.440052	-0.517144	0.478598	0.478598
17692643	3.94914	3.36752	4.39255	-0.581619	0.581619	0.443412	0.443412	-1.02503	1.02503
17695845	5.63981	5.49155	4.89756	-0.14826	0.14826	0.445726	-0.742246	0.593986	0.593986
17883033	3.3336	3.46797	4.04845	0.134369	0.134369	0.446114	0.714852	-0.580483	0.580483
17609883	5.04209	4.57217	3.65473	-0.469919	0.469919	0.447526	-1.38737	0.917446	0.917446
17868867	3.84306	3.90236	4.40981	0.0592918	0.0592918	0.448167	0.56675	-0.507459	0.507459
17830985	5.66203	5.84831	5.20972	0.186271	0.186271	0.452315	-0.452315	0.638586	0.638586
17734841	6.0468	6.40937	5.59257	0.36257	0.36257	0.454223	-0.454223	0.816793	0.816793
17661171	4.79146	5.11158	4.3354	0.320124	0.320124	0.456051	-0.456051	0.776175	0.776175
17835470	7.23672	7.35786	6.78064	0.121145	0.121145	0.456081	-0.456081	0.577226	0.577226
17795541	8.85701	9.06007	8.40033	0.203061	0.203061	0.456671	-0.456671	0.659732	0.659732
17809625	5.84671	5.5981	4.89129	-0.248611	0.248611	0.458199	-0.95542	0.706809	0.706809
17602263	5.99121	5.83587	5.22077	-0.155345	0.155345	0.459755	-0.770446	0.615101	0.615101
17842288	3.0684	2.99378	3.52833	-0.0746139	0.0746139	0.459929	0.459929	-0.534543	0.534543
17818649	2.19725	2.10041	2.65855	-0.0968377	0.0968377	0.461304	0.461304	-0.558142	0.558142
17650515	5.02184	4.91213	4.33954	-0.109703	0.109703	0.462889	-0.682294	0.572591	0.572591
17878133	5.01262	4.90004	4.31779	-0.112574	0.112574	0.469674	-0.694822	0.582248	0.582248
17735497	8.51227	8.65281	8.04123	0.140536	0.140536	0.47104	-0.47104	0.611575	0.611575
17609731	5.9559	5.77868	5.13027	-0.177218	0.177218	0.471192	-0.825629	0.648411	0.648411
17767178	8.15245	8.04809	8.62374	-0.104357	0.104357	0.471289	0.471289	-0.575646	0.575646
17605923	5.29388	5.02512	4.28483	-0.268756	0.268756	0.471533	-1.00905	0.740289	0.740289
17679728	6.15983	6.13303	6.63198	-0.0267936	0.0267936	0.472154	0.472154	-0.498948	0.498948
17605933	4.53206	4.16303	3.31851	-0.369027	0.369027	0.475495	-1.21355	0.844522	0.844522
17742987	5.03287	4.99569	5.50902	-0.0371842	0.0371842	0.476148	0.476148	-0.513332	0.513332
17827629	4.25777	4.0157	3.29609	-0.242074	0.242074	0.477528	-0.961677	0.719603	0.719603
17863770	6.25836	6.31963	5.7798	0.0612742	0.0612742	0.478556	-0.478556	0.53983	0.53983
17715140	3.44431	3.66491	4.36467	0.220597	0.220597	0.479167	0.920361	-0.699764	0.699764
17643356	5.12535	5.13685	4.64499	0.0115014	0.0115014	0.480361	-0.480361	0.491863	0.491863
17723509	3.99132	3.62756	4.47366	-0.363759	0.363759	0.482346	0.482346	-0.846105	0.846105
17730478	6.05045	5.99667	5.45965	-0.0537811	0.0537811	0.48323	-0.590792	0.537011	0.537011
17698012	6.14765	6.26718	5.66331	0.119525	0.119525	0.484345	-0.484345	0.60387	0.60387
17750608	5.0216	5.07099	4.53356	0.0493925	0.0493925	0.488037	-0.488037	0.53743	0.53743
17749142	4.56757	4.61635	5.15318	0.0487863	0.0487863	0.488038	0.585611	-0.536825	0.536825
17665319	5.72028	6.03871	5.23195	0.318426	0.318426	0.488325	-0.488325	0.806751	0.806751
17795586	5.45953	5.37764	4.80663	-0.0818904	0.0818904	0.489118	-0.652899	0.571008	0.571008
17764152	4.88753	4.99151	4.39408	0.103982	0.103982	0.493453	-0.493453	0.597434	0.597434
17814793	3.01295	2.96438	3.50716	-0.0485696	0.0485696	0.494205	0.494205	-0.542775	0.542775
17834736	5.99084	5.96248	5.43731	-0.0283622	0.0283622	0.496803	-0.553527	0.525165	0.525165
17635588	4.44675	4.01679	4.94451	-0.429955	0.429955	0.497761	0.497761	-0.927716	0.927716
17725346	6.37881	6.44923	5.88032	0.0704208	0.0704208	0.498484	-0.498484	0.568905	0.568905
17690395	4.69929	4.68044	5.19815	-0.0188519	0.0188519	0.498858	0.498858	-0.517709	0.517709
17766359	5.33686	5.45726	4.83759	0.120402	0.120402	0.499266	-0.499266	0.619668	0.619668
17635898	7.55116	7.46592	6.87957	-0.0852387	0.0852387	0.50111	-0.671588	0.586349	0.586349
17836123	8.93098	9.04095	8.42666	0.10997	0.10997	0.504319	-0.504319	0.61429	0.61429
17794149	5.83137	5.77443	5.21067	-0.0569466	0.0569466	0.506806	-0.620699	0.563752	0.563752
17790823	4.66392	4.48717	3.80276	-0.176753	0.176753	0.507653	-0.86116	0.684407	0.684407
17628420	8.92974	8.93746	8.42165	0.00771816	0.00771816	0.50809	-0.50809	0.515808	0.515808
17820661	5.75166	5.6864	5.11196	-0.0652578	0.0652578	0.50918	-0.639695	0.574437	0.574437
17781280	3.99155	3.59604	4.50438	-0.395515	0.395515	0.512827	0.512827	-0.908342	0.908342
17706642	5.41196	5.42918	4.89826	0.0172171	0.0172171	0.513699	-0.513699	0.530916	0.530916
17619462	7.79969	7.90886	7.28511	0.109178	0.109178	0.514572	-0.514572	0.62375	0.62375
17864430	4.6787	4.66438	4.13392	-0.0143232	0.0143232	0.516135	-0.544782	0.530458	0.530458
17606075	5.47635	5.61628	4.95863	0.139935	0.139935	0.517716	-0.517716	0.657651	0.657651
17603743	6.02129	5.87602	5.2115	-0.145271	0.145271	0.51925	-0.809791	0.66452	0.66452
17798022	5.74644	6.02721	5.22577	0.280768	0.280768	0.520672	-0.520672	0.80144	0.80144
17668584	2.66389	2.4427	3.18582	-0.221191	0.221191	0.521934	0.521934	-0.743126	0.743126
17844664	4.21804	4.14188	3.54254	-0.076157	0.076157	0.523186	-0.675499	0.599342	0.599342
17715330	8.25578	8.19686	7.61371	-0.0589222	0.0589222	0.524226	-0.642071	0.583149	0.583149
17787545	3.95956	4.09281	4.75049	0.133251	0.133251	0.524432	0.790933	-0.657682	0.657682
17623687	6.96472	6.95169	6.41342	-0.0130315	0.0130315	0.525244	-0.551307	0.538275	0.538275
17753995	3.98779	4.10273	4.74376	0.114939	0.114939	0.526096	0.755974	-0.641035	0.641035
17859318	7.19154	7.35047	6.664	0.158934	0.158934	0.527543	-0.527543	0.686478	0.686478
17725726	4.40892	4.34008	3.74301	-0.0688484	0.0688484	0.52822	-0.665917	0.597068	0.597068
17779805	4.35443	4.40172	3.82416	0.0472891	0.0472891	0.530268	-0.530268	0.577557	0.577557
17658370	5.15298	4.99274	4.30195	-0.160238	0.160238	0.530556	-0.851032	0.690794	0.690794
17846131	3.12834	3.16591	3.73437	0.0375756	0.0375756	0.530881	0.606032	-0.568457	0.568457
17857996	6.02007	5.99576	5.43986	-0.0243074	0.0243074	0.5316	-0.580215	0.555908	0.555908
17713941	3.35754	3.55006	4.27468	0.192518	0.192518	0.532102	0.917138	-0.72462	0.72462
17600109	6.6133	6.60044	6.05342	-0.012855	0.012855	0.534162	-0.559872	0.547017	0.547017
17604187	4.91211	4.93803	4.37766	0.025924	0.025924	0.534454	-0.534454	0.560378	0.560378
17743645	6.30132	6.33205	5.76533	0.030728	0.030728	0.535995	-0.535995	0.566723	0.566723
17818321	8.76221	8.62733	7.95515	-0.134877	0.134877	0.537304	-0.807058	0.672181	0.672181
17724811	5.40319	5.3565	4.77199	-0.0466875	0.0466875	0.537819	-0.631194	0.584506	0.584506
17676796	9.54114	9.62071	9.00184	0.0795734	0.0795734	0.539299	-0.539299	0.618872	0.618872
17608739	6.66418	6.74446	6.1243	0.080278	0.080278	0.539879	-0.539879	0.620157	0.620157
17680226	3.81794	4.14178	5.00602	0.323847	0.323847	0.540385	1.18808	-0.864232	0.864232
17672714	8.05806	8.08743	7.51682	0.0293695	0.0293695	0.541239	-0.541239	0.570609	0.570609
17882677	8.02978	8.10259	7.4882	0.0728138	0.0728138	0.54158	-0.54158	0.614394	0.614394
17816196	4.70215	4.6039	3.96296	-0.0982432	0.0982432	0.542698	-0.739184	0.640941	0.640941
17609571	6.39922	6.37243	5.79808	-0.0267859	0.0267859	0.547569	-0.60114	0.574354	0.574354
17697961	6.77075	6.80896	6.22055	0.0382092	0.0382092	0.550205	-0.550205	0.588414	0.588414
17706032	7.22125	7.15578	6.53997	-0.0654629	0.0654629	0.550349	-0.681275	0.615812	0.615812
17708013	6.06527	6.15102	5.51294	0.0857508	0.0857508	0.552328	-0.552328	0.638079	0.638079
17707766	4.63158	4.59199	5.18721	-0.039594	0.039594	0.555623	0.555623	-0.595217	0.595217
17600827	6.23197	6.38497	5.67448	0.153004	0.153004	0.557492	-0.557492	0.710496	0.710496
17601663	5.36873	5.15868	4.39106	-0.210059	0.210059	0.557555	-0.977673	0.767614	0.767614
17795515	6.87319	7.0265	6.31302	0.153313	0.153313	0.560174	-0.560174	0.713487	0.713487
17683397	1.58981	1.45387	2.15063	-0.135937	0.135937	0.560821	0.560821	-0.696758	0.696758
17600089	5.19716	5.32299	4.63529	0.125832	0.125832	0.561866	-0.561866	0.687697	0.687697
17711987	4.12049	4.16271	4.77	0.0422242	0.0422242	0.565067	0.649516	-0.607292	0.607292
17880744	4.8967	4.73063	5.46237	-0.166076	0.166076	0.565661	0.565661	-0.731736	0.731736
17671298	4.34666	4.05623	4.91402	-0.290429	0.290429	0.567355	0.567355	-0.857785	0.857785
17874533	4.3718	4.04	4.93987	-0.331799	0.331799	0.568073	0.568073	-0.899872	0.899872
17757449	4.87095	4.88691	4.30018	0.0159569	0.0159569	0.570765	-0.570765	0.586722	0.586722
17689697	5.58822	5.4152	4.6713	-0.173023	0.173023	0.570874	-0.91692	0.743897	0.743897
17676538	4.01501	4.02719	4.61036	0.0121802	0.0121802	0.570987	0.595347	-0.583167	0.583167
17878822	4.96423	4.97793	4.39276	0.0136981	0.0136981	0.571464	-0.571464	0.585162	0.585162
17607563	6.3295	6.1908	5.47698	-0.1387	0.1387	0.575119	-0.852519	0.713819	0.713819
17608981	6.3295	6.1908	5.47698	-0.1387	0.1387	0.575119	-0.852519	0.713819	0.713819
17860307	4.48226	4.43839	5.06069	-0.043869	0.043869	0.578435	0.578435	-0.622304	0.622304
17653639	6.9781	6.82364	6.08701	-0.154463	0.154463	0.582159	-0.891085	0.736622	0.736622
17605331	5.74163	5.74787	5.15869	0.00623932	0.00623932	0.582938	-0.582938	0.589177	0.589177
17739798	6.50557	6.66417	5.92109	0.158606	0.158606	0.58448	-0.58448	0.743087	0.743087
17829493	4.66983	4.42085	3.58597	-0.248984	0.248984	0.585895	-1.08386	0.834879	0.834879
17883003	4.66983	4.42085	3.58597	-0.248984	0.248984	0.585895	-1.08386	0.834879	0.834879
17602131	4.82947	4.72456	4.03324	-0.104905	0.104905	0.586421	-0.79623	0.691326	0.691326
17880340	3.12328	3.25536	3.97398	0.132082	0.132082	0.586533	0.850697	-0.718615	0.718615
17730701	4.36186	4.38521	4.99522	0.0233508	0.0233508	0.586663	0.633365	-0.610014	0.610014
17604367	6.58654	6.66164	5.99493	0.0751025	0.0751025	0.591609	-0.591609	0.666712	0.666712
17860505	5.56483	5.5223	4.8881	-0.0425339	0.0425339	0.591665	-0.676733	0.634199	0.634199
17725423	3.75825	3.35295	4.35019	-0.405299	0.405299	0.591941	0.591941	-0.99724	0.99724
17774270	4.54129	4.46962	5.13632	-0.0716733	0.0716733	0.595026	0.595026	-0.666699	0.666699
17696324	5.24827	5.31253	4.65211	0.0642511	0.0642511	0.596163	-0.596163	0.660414	0.660414
17771174	5.3793	5.35464	4.73141	-0.0246648	0.0246648	0.598561	-0.64789	0.623226	0.623226
17671409	2.38038	2.66618	3.5512	0.285803	0.285803	0.599215	1.17082	-0.885017	0.885017
17608137	5.50116	5.41577	4.73062	-0.0853878	0.0853878	0.599762	-0.770537	0.68515	0.68515
17792028	3.76976	3.71676	4.37008	-0.0530012	0.0530012	0.600319	0.600319	-0.653321	0.653321
17711255	2.14484	2.12008	2.74987	-0.0247682	0.0247682	0.605025	0.605025	-0.629793	0.629793
17878331	2.41641	2.26728	3.02354	-0.149127	0.149127	0.60713	0.60713	-0.756257	0.756257
17604869	6.03103	6.18005	5.4237	0.149011	0.149011	0.607333	-0.607333	0.756344	0.756344
17604931	5.01158	5.21463	6.03089	0.203049	0.203049	0.613215	1.01931	-0.816264	0.816264
17879490	2.91289	2.68488	1.84254	-0.228004	0.228004	0.614335	-1.07034	0.842339	0.842339
17602873	4.73212	5.09726	4.11747	0.365142	0.365142	0.614653	-0.614653	0.979795	0.979795
17603699	5.26918	5.38186	4.65436	0.112683	0.112683	0.614823	-0.614823	0.727506	0.727506
17794646	7.39446	7.29314	6.5729	-0.101327	0.101327	0.618907	-0.821561	0.720234	0.720234
17781469	4.01365	3.9887	3.34436	-0.0249592	0.0249592	0.619379	-0.669298	0.644338	0.644338
17738823	3.74768	3.45195	2.53455	-0.295735	0.295735	0.621662	-1.21313	0.917397	0.917397
17706458	2.92124	3.00987	3.72129	0.0886221	0.0886221	0.622807	0.800051	-0.711429	0.711429
17630609	7.07871	7.1356	6.45447	0.0568939	0.0568939	0.624236	-0.624236	0.68113	0.68113
17761410	5.9605	6.40917	5.33235	0.448678	0.448678	0.628144	-0.628144	1.07682	1.07682
17761412	5.9605	6.40917	5.33235	0.448678	0.448678	0.628144	-0.628144	1.07682	1.07682
17610001	5.95645	5.91514	5.24566	-0.0413111	0.0413111	0.628169	-0.710792	0.669481	0.669481
17851627	5.28327	5.20192	4.49146	-0.0813509	0.0813509	0.629112	-0.791813	0.710462	0.710462
17622279	11.7101	12.5528	11.0787	0.842721	0.842721	0.631398	-0.631398	1.47412	1.47412
17641707	2.458	2.05349	3.09096	-0.404511	0.404511	0.63296	0.63296	-1.03747	1.03747
17602907	4.37507	4.15027	3.2895	-0.224803	0.224803	0.635969	-1.08557	0.860772	0.860772
17698547	1.24118	1.66156	2.71862	0.420382	0.420382	0.636678	1.47744	-1.05706	1.05706
17858292	4.49395	4.36721	3.60368	-0.126747	0.126747	0.636784	-0.890278	0.763531	0.763531
17668900	6.23225	6.37081	5.5891	0.13856	0.13856	0.643156	-0.643156	0.781716	0.781716
17755250	7.34987	7.59534	6.70518	0.245475	0.245475	0.644688	-0.644688	0.890163	0.890163
17668004	7.82304	7.8993	7.17541	0.0762575	0.0762575	0.647624	-0.647624	0.723881	0.723881
17607139	6.50878	6.67202	5.86001	0.163245	0.163245	0.64877	-0.64877	0.812015	0.812015
17837103	2.61222	2.92011	3.87829	0.307883	0.307883	0.650305	1.26607	-0.958188	0.958188
17602419	5.61104	5.60051	4.93702	-0.0105298	0.0105298	0.652967	-0.674027	0.663497	0.663497
17600099	7.13359	7.21669	6.4775	0.083102	0.083102	0.656087	-0.656087	0.739189	0.739189
17653930	4.03666	3.66924	4.69404	-0.367418	0.367418	0.657373	0.657373	-1.02479	1.02479
17603831	6.62223	6.53954	5.79855	-0.0826821	0.0826821	0.658315	-0.823679	0.740997	0.740997
17606871	5.07671	5.05495	4.3744	-0.0217627	0.0217627	0.658785	-0.70231	0.680547	0.680547
17606303	4.24764	3.55759	2.20769	-0.690054	0.690054	0.659842	-2.03995	1.3499	1.3499
17609499	6.25796	6.14665	5.37517	-0.11131	0.11131	0.660169	-0.882788	0.771479	0.771479
17843069	4.75437	4.41029	5.4219	-0.344077	0.344077	0.667531	0.667531	-1.01161	1.01161
17880833	3.57912	3.69271	4.47545	0.113586	0.113586	0.669154	0.896327	-0.78274	0.78274
17628980	3.39479	2.89806	4.06448	-0.496728	0.496728	0.669688	0.669688	-1.16642	1.16642
17608695	5.40093	5.5521	4.71857	0.15117	0.15117	0.682359	-0.682359	0.833529	0.833529
17848607	6.23751	6.23034	5.53965	-0.0071773	0.0071773	0.683506	-0.69786	0.690683	0.690683
17845815	5.34214	5.37924	4.65784	0.0370992	0.0370992	0.684302	-0.684302	0.721401	0.721401
17711322	3.89178	3.67299	4.57745	-0.218795	0.218795	0.685664	0.685664	-0.904459	0.904459
17605689	4.82795	5.16931	4.14172	0.34136	0.34136	0.686226	-0.686226	1.02759	1.02759
17626561	8.95845	9.01017	8.26878	0.0517186	0.0517186	0.689673	-0.689673	0.741392	0.741392
17670276	3.36561	2.5546	1.04825	-0.81101	0.81101	0.695345	-2.31736	1.50636	1.50636
17602291	5.71546	5.63545	4.85882	-0.0800148	0.0800148	0.696611	-0.85664	0.776625	0.776625
17694311	4.17546	4.31763	5.15815	0.142172	0.142172	0.698349	0.982692	-0.84052	0.84052
17704845	1.65489	1.52361	2.3576	-0.131281	0.131281	0.702707	0.702707	-0.833987	0.833987
17759530	5.47477	5.44267	4.70564	-0.0321063	0.0321063	0.704919	-0.769132	0.737025	0.737025
17602901	5.71196	5.60926	4.80057	-0.1027	0.1027	0.705988	-0.911387	0.808688	0.808688
17795659	5.64348	5.18241	4.00729	-0.461068	0.461068	0.714045	-1.63618	1.17511	1.17511
17688569	2.76298	2.85285	3.66277	0.0898753	0.0898753	0.720038	0.899789	-0.809913	0.809913
17709647	5.53348	5.51803	4.775	-0.0154483	0.0154483	0.727583	-0.758479	0.743031	0.743031
17726649	3.36431	3.21302	4.09717	-0.151292	0.151292	0.73286	0.73286	-0.884152	0.884152
17607005	5.17086	5.186	4.43124	0.0151334	0.0151334	0.739627	-0.739627	0.754761	0.754761
17602609	4.77689	5.15722	4.03196	0.380322	0.380322	0.744934	-0.744934	1.12526	1.12526
17608131	4.19103	4.0961	3.24749	-0.0949308	0.0949308	0.753683	-0.943545	0.848614	0.848614
17652674	0.572302	0.995466	2.1791	0.423164	0.423164	0.760471	1.6068	-1.18364	1.18364
17763691	3.96811	3.88806	4.73055	-0.0800542	0.0800542	0.762434	0.762434	-0.842488	0.842488
17709281	4.93049	4.88959	4.08073	-0.0408993	0.0408993	0.767965	-0.849763	0.808864	0.808864
17638660	4.48823	4.42944	3.59428	-0.0587914	0.0587914	0.776372	-0.893955	0.835164	0.835164
17605823	5.32934	5.63017	4.54784	0.300837	0.300837	0.781494	-0.781494	1.08233	1.08233
17606093	6.11499	6.13603	5.33103	0.0210411	0.0210411	0.783965	-0.783965	0.805006	0.805006
17874161	6.34081	6.40807	5.53048	0.0672608	0.0672608	0.810327	-0.810327	0.877588	0.877588
17778304	3.58538	3.56607	4.39691	-0.0193165	0.0193165	0.811523	0.811523	-0.83084	0.83084
17825553	6.24154	6.27412	5.426	0.0325759	0.0325759	0.81555	-0.81555	0.848125	0.848125
17678168	4.10892	4.06858	3.21174	-0.0403329	0.0403329	0.816506	-0.897172	0.856839	0.856839
17602021	3.14751	3.19565	4.07001	0.0481323	0.0481323	0.826237	0.922501	-0.874369	0.874369
17795527	8.29848	8.43227	7.47061	0.133797	0.133797	0.827863	-0.827863	0.96166	0.96166
17633915	4.35039	4.06398	5.17879	-0.286407	0.286407	0.828399	0.828399	-1.11481	1.11481
17718463	3.77585	4.20288	2.92821	0.42703	0.42703	0.847647	-0.847647	1.27468	1.27468
17602333	7.11194	7.07479	6.18915	-0.037158	0.037158	0.848477	-0.922793	0.885635	0.885635
17817740	2.72337	2.55444	3.57685	-0.168926	0.168926	0.853483	0.853483	-1.02241	1.02241
17603879	4.62002	4.76318	3.76428	0.143164	0.143164	0.855739	-0.855739	0.998903	0.998903
17624899	5.22993	5.31869	4.37098	0.0887523	0.0887523	0.858952	-0.858952	0.947705	0.947705
17603845	3.90129	3.7513	2.72567	-0.149985	0.149985	0.875646	-1.17562	1.02563	1.02563
17605475	5.06951	4.99727	4.03917	-0.0722479	0.0722479	0.885845	-1.03034	0.958093	0.958093
17725233	3.44169	3.34792	4.3681	-0.0937715	0.0937715	0.926409	0.926409	-1.02018	1.02018
17600899	5.30363	4.82725	3.4234	-0.476374	0.476374	0.927475	-1.88022	1.40385	1.40385
17601219	5.30363	4.82725	3.4234	-0.476374	0.476374	0.927475	-1.88022	1.40385	1.40385
17605455	5.32085	5.49101	4.38851	0.170154	0.170154	0.932345	-0.932345	1.1025	1.1025
17602041	4.28857	4.07581	5.23201	-0.212753	0.212753	0.943439	0.943439	-1.15619	1.15619
17605113	4.90159	4.83521	3.81901	-0.0663839	0.0663839	0.949816	-1.08258	1.0162	1.0162
17607905	3.56778	3.49616	4.55351	-0.0716253	0.0716253	0.985729	0.985729	-1.05735	1.05735
17649604	5.28116	4.93771	3.60835	-0.343457	0.343457	0.985898	-1.67281	1.32936	1.32936
17604533	3.70048	3.57835	2.45821	-0.122123	0.122123	0.998021	-1.24227	1.12014	1.12014
17755886	5.0209	4.97199	3.92062	-0.048917	0.048917	1.00245	-1.10028	1.05136	1.05136
17607287	4.72381	4.69433	3.66128	-0.0294809	0.0294809	1.00357	-1.06253	1.03305	1.03305
17634774	2.08345	1.98572	3.08814	-0.0977334	0.0977334	1.00469	1.00469	-1.10242	1.10242
17713258	6.77722	6.76469	5.74104	-0.0125235	0.0125235	1.01113	-1.03618	1.02366	1.02366
17608255	5.4055	5.28876	4.15809	-0.116737	0.116737	1.01393	-1.24741	1.13067	1.13067
17606177	4.54683	4.66208	3.51429	0.115244	0.115244	1.03254	-1.03254	1.14779	1.14779
17613818	3.0528	3.1264	4.23332	0.0735977	0.0735977	1.03332	1.18051	-1.10692	1.10692
17606227	4.88154	5.36033	3.8455	0.478789	0.478789	1.03605	-1.03605	1.51483	1.51483
17711913	2.17338	1.69401	0.174809	-0.479366	0.479366	1.03984	-1.99857	1.51921	1.51921
17839733	3.67221	3.64084	4.7133	-0.0313731	0.0313731	1.04109	1.04109	-1.07246	1.07246
17608269	5.6213	5.86286	4.54941	0.241559	0.241559	1.07189	-1.07189	1.31345	1.31345
17604063	2.96774	3.65358	1.87744	0.685835	0.685835	1.09031	-1.09031	1.77614	1.77614
17604555	3.24342	2.57565	4.33491	-0.667769	0.667769	1.09149	1.09149	-1.75926	1.75926
17692790	3.75344	3.52032	2.16769	-0.233121	0.233121	1.11951	-1.58575	1.35263	1.35263
17603983	4.03624	4.3724	2.90225	0.336158	0.336158	1.13399	-1.13399	1.47015	1.47015
17607021	3.11355	2.91224	4.25737	-0.20131	0.20131	1.14383	1.14383	-1.34514	1.34514
17612399	6.70104	6.78271	5.54454	0.0816729	0.0816729	1.1565	-1.1565	1.23817	1.23817
17730371	5.63482	5.40431	4.01367	-0.230508	0.230508	1.16013	-1.62115	1.39064	1.39064
17609891	3.8744	3.79197	5.03526	-0.0824305	0.0824305	1.16086	1.16086	-1.24329	1.24329
17814060	2.15544	2.17417	3.36134	0.0187327	0.0187327	1.16843	1.2059	-1.18716	1.18716
17681825	9.89849	9.69051	8.30593	-0.207986	0.207986	1.17659	-1.59257	1.38458	1.38458
17762108	4.17117	4.09653	2.81999	-0.0746432	0.0746432	1.2019	-1.35118	1.27654	1.27654
17607185	3.54506	2.92468	1.09866	-0.620378	0.620378	1.20564	-2.4464	1.82602	1.82602
17619058	3.12376	2.99268	4.33544	-0.131079	0.131079	1.21168	1.21168	-1.34276	1.34276
17605597	5.32014	5.17635	3.80427	-0.143785	0.143785	1.2283	-1.51587	1.37209	1.37209
17609383	6.10192	6.15673	4.86394	0.0548028	0.0548028	1.23798	-1.23798	1.29279	1.29279
17700702	3.73652	3.67719	2.37566	-0.059329	0.059329	1.2422	-1.36086	1.30153	1.30153
17795674	5.85309	6.29979	4.53527	0.446701	0.446701	1.31782	-1.31782	1.76452	1.76452
17610007	4.67642	4.69042	3.33979	0.0139992	0.0139992	1.33663	-1.33663	1.35062	1.35062
17734970	2.20679	2.93029	5.01299	0.723505	0.723505	1.3592	2.80621	-2.0827	2.0827
17882901	2.20679	2.93029	5.01299	0.723505	0.723505	1.3592	2.80621	-2.0827	2.0827
17674311	5.47973	5.3831	3.87766	-0.0966333	0.0966333	1.40881	-1.60207	1.50544	1.50544
17600925	2.50678	2.88227	1.07128	0.375495	0.375495	1.4355	-1.4355	1.81099	1.81099
17601245	2.50678	2.88227	1.07128	0.375495	0.375495	1.4355	-1.4355	1.81099	1.81099
17601259	2.50678	2.88227	1.07128	0.375495	0.375495	1.4355	-1.4355	1.81099	1.81099
17600181	4.50788	4.5138	3.06432	0.00591386	0.00591386	1.44356	-1.44356	1.44947	1.44947
17601935	3.59429	3.51966	1.96688	-0.0746313	0.0746313	1.47815	-1.62741	1.55278	1.55278
17604905	4.421	4.48622	2.90259	0.0652193	0.0652193	1.5184	-1.5184	1.58362	1.58362
17607527	4.35634	4.16389	2.45144	-0.19245	0.19245	1.52	-1.9049	1.71245	1.71245
17608945	4.35634	4.16389	2.45144	-0.19245	0.19245	1.52	-1.9049	1.71245	1.71245
17605441	2.68328	2.62646	1.03429	-0.0568234	0.0568234	1.53535	-1.64899	1.59217	1.59217
17795684	6.82715	6.98675	5.28256	0.159603	0.159603	1.54459	-1.54459	1.7042	1.7042
17843745	3.7279	4.07107	2.17561	0.343165	0.343165	1.55229	-1.55229	1.89545	1.89545
17607505	4.10969	4.05838	2.4307	-0.0513082	0.0513082	1.57638	-1.67899	1.62769	1.62769
17608923	4.10969	4.05838	2.4307	-0.0513082	0.0513082	1.57638	-1.67899	1.62769	1.62769
17607699	4.52316	4.37018	2.63991	-0.15298	0.15298	1.57729	-1.88325	1.73027	1.73027
17609117	4.52316	4.37018	2.63991	-0.15298	0.15298	1.57729	-1.88325	1.73027	1.73027
17763461	4.71655	4.96869	3.0727	0.252139	0.252139	1.64385	-1.64385	1.89599	1.89599
17720295	1.4928	1.30053	3.15342	-0.192261	0.192261	1.66063	1.66063	-1.85289	1.85289
17601919	4.82436	4.73146	2.93927	-0.0928955	0.0928955	1.6993	-1.88509	1.7922	1.7922
17605083	3.24333	3.85474	1.37635	0.61141	0.61141	1.86698	-1.86698	2.47839	2.47839
17605389	3.2637	3.78048	1.07727	0.516774	0.516774	2.18643	-2.18643	2.7032	2.7032
17609553	4.3176	4.0684	1.47233	-0.2492	0.2492	2.34688	-2.84528	2.59608	2.59608
